# Supplementary material for: GTPBP1 resolves paused ribosomes to maintain neuronal homeostasis
Source: eLife. 2020 Nov 13;9:e62731. doi: 10.7554/eLife.62731 (PMC7665888; doi:10.7554/eLife.62731)
Supplement: Figure 1—source data 1. [file elife-62731-fig1-data1.xlsx]

## Sheet: Panel G
Granule Cells
3 weeks
lobule VI
#1 Gtpbp1	section #1	513		#1 NMF205	section #1	578		#1 Gtpbp1, NMF205	section #1	554		#1 B6J	section #1	464
	section #2	520			section #2	461			section #2	471			section #2	483
	section #3	454			section #3	459			section #3	440			section #3	478
	mean	495.667			mean	499.333			mean	488.333			mean	475
#2 Gtpbp1	section #1	526		#2 NMF205	section #1	418		#2 Gtpbp1, NMF205	section #1	439		#2 B6J	section #1	493
	section #2	501			section #2	461			section #2	466			section #2	487
	section #3	436			section #3	496			section #3	459			section #3	536
	mean	487.667			mean	458.333			mean	454.667			mean	505.333
#3 Gtpbp1	section #1	432		#3 NMF205	section #1	467		#3 Gtpbp1, NMF205	section #1	538		#3 B6J	section #1	450
	section #2	439			section #2	438			section #2	474			section #2	480
	section #3	474			section #3	471			section #3	485			section #3	518
	mean	448.333			mean	458.667			mean	499			mean	482.667
Granule Cells
4 weeks
lobule VI
#1 Gtpbp1	section #1	305.882		#1 NMF205	section #1	444.444		#1 Gtpbp1, NMF205	section #1	420		#1 B6J	section #1	567
	section #2	396.078			section #2	411.765			section #2	415			section #2	513.725
	section #3	380.392			section #3	427.451			section #3	360			section #3	555.556
	mean	360.784			mean	427.887			mean	398.333			mean	545.427
#2 Gtpbp1	section #1	358.17		#2 NMF205	section #1	424.837		#2 Gtpbp1, NMF205	section #1	395		#2 B6J	section #1	509.804
	section #2	418.301			section #2	351.634			section #2	356			section #2	488.889
	section #3	389.542			section #3	375.163			section #3	368			section #3	512.418
	mean	388.671			mean	383.878			mean	373			mean	503.704
#3 Gtpbp1	section #1	366.013		#3 NMF205	section #1	340		#3 Gtpbp1, NMF205	section #1	402		#3 B6J	section #1	496.732
	section #2	379.085			section #2	353			section #2	432			section #2	511.111
	section #3	409.15			section #3	438			section #3	414			section #3	529.412
	mean	384.749			mean	377			mean	416			mean	512.418
Granule Cells
6 weeks
lobule VI
#1 Gtpbp1	section #1	261		#1 NMF205	section #1	220		#1 Gtpbp1, NMF205	section #1	263		#1 B6J	section #1	524
	section #2	206			section #2	226			section #2	311			section #2	498
	section #3	274			section #3	243			section #3	251			section #3	493
	mean	247			mean	229.667			mean	275			mean	505
#2 Gtpbp1	section #1	243		#2 NMF205	section #1	296		#2 Gtpbp1, NMF205	section #1	207		#2 B6J	section #1	445
	section #2	262			section #2	223			section #2	243			section #2	480
	section #3	273			section #3	271			section #3	270			section #3	496
	mean	259.333			mean	263.333			mean	240			mean	473.667
#3 Gtpbp1	section #1	261		#3 NMF205	section #1	203		#3 Gtpbp1, NMF205	section #1	287		#3 B6J	section #1	454
	section #2	235			section #2	249			section #2	207			section #2	508
	section #3	302			section #3	276			section #3	238			section #3	507
	mean	266			mean	242.667			mean	244			mean	489.667

## Sheet: Panel H
Granule Cells
3 weeks
lobule IX
#1 Gtpbp1	section #1	544		#1 NMF205	section #1	635		#1 Gtpbp1, NMF205	section #1	495		#1 B6J	section #1	678
	section #2	498			section #2	555			section #2	590			section #2	558
	section #3	575			section #3	570			section #3	578			section #3	548
	mean	539			mean	586.667			mean	554.333			mean	594.667
#2 Gtpbp1	section #1	508		#2 NMF205	section #1	466		#2 Gtpbp1, NMF205	section #1	557		#2 B6J	section #1	524
	section #2	523			section #2	541			section #2	519			section #2	570
	section #3	497			section #3	556			section #3	504			section #3	528
	mean	509.333			mean	521			mean	526.667			mean	540.667
#3 Gtpbp1	section #1	555		#3 NMF205	section #1	536		#3 Gtpbp1, NMF205	section #1	621		#3 B6J	section #1	545
	section #2	562			section #2	577			section #2	567			section #2	598
	section #3	574			section #3	590			section #3	534			section #3	535
	mean	563.667			mean	567.667			mean	574			mean	559.333
Granule Cells
4 weeks
lobule IX
#1 Gtpbp1	section #1	309		#1 NMF205	section #1	302		#1 Gtpbp1, NMF205	section #1	321		#1 B6J	section #1	539
	section #2	328			section #2	335			section #2	317			section #2	513
	section #3	299			section #3	278			section #3	312			section #3	478
	mean	312			mean	305			mean	316.667			mean	510
#2 Gtpbp1	section #1	299		#2 NMF205	section #1	325		#2 Gtpbp1, NMF205	section #1	240		#2 B6J	section #1	515
	section #2	276			section #2	297			section #2	253			section #2	509
	section #3	316			section #3	301			section #3	242			section #3	493
	mean	297			mean	307.667			mean	245			mean	505.667
#3 Gtpbp1	section #1	356		#3 NMF205	section #1	256		#3 Gtpbp1, NMF205	section #1	306		#3 B6J	section #1	629
	section #2	297			section #2	286			section #2	263			section #2	525
	section #3	332			section #3	318			section #3	295			section #3	492
	mean	328.333			mean	286.667			mean	288			mean	548.667
Granule Cells
6 weeks
lobule IX
#1 Gtpbp1	section #1	187		#1 NMF205	section #1	200		#1 Gtpbp1, NMF205	section #1	118		#1 B6J	section #1	505
	section #2	152			section #2	174			section #2	232			section #2	488
	section #3	162			section #3	175			section #3	158			section #3	459
	mean	167			mean	183			mean	169.333			mean	484
#2 Gtpbp1	section #1	206		#2 NMF205	section #1	172		#2 Gtpbp1, NMF205	section #1	202		#2 B6J	section #1	458
	section #2	185			section #2	190			section #2	168			section #2	508
	section #3	162			section #3	202			section #3	213			section #3	502
	mean	184.333			mean	188			mean	194.333			mean	489.333
#3 Gtpbp1	section #1	173		#3 NMF205	section #1	161		#3 Gtpbp1, NMF205	section #1	172		#3 B6J	section #1	523
	section #2	171			section #2	177			section #2	142			section #2	487
	section #3	185			section #3	188			section #3	184			section #3	507
	mean	176.333			mean	175.333			mean	166			mean	505.667
