# Supplementary material for: GTPBP1 resolves paused ribosomes to maintain neuronal homeostasis
Source: eLife. 2020 Nov 13;9:e62731. doi: 10.7554/eLife.62731 (PMC7665888; doi:10.7554/eLife.62731)
Supplement: Figure 2—source data 1. [file elife-62731-fig2-data1.xlsx]

## Sheet: Panel A
codon pausing A-site
	wtJ_1	wtJ_2	wtJ_3	J_BP1_1	J_BP1_2	J_BP1_3
CCT - Pro	1.12068	1.21812	1.32552	1.17709	1.11783	1.21003
CCG - Pro	0.945454	1.03119	1.27563	1.14392	1.08062	1.15223
CCA - Pro	1.17882	1.20878	1.31777	1.28219	1.19581	1.21846
CCC - Pro	1.02337	1.2038	1.24959	1.23243	1.0215	1.08873
TAT - Tyr	0.961895	0.806736	0.879455	0.9093	1.00507	0.924581
TAC - Tyr	1.04332	0.868382	0.931213	0.93269	1.11936	1.11774
AGG - Arg	0.90183	1.03858	1.03562	0.974968	0.991957	1.07766
AGA - Arg	0.995503	0.862269	1.2465	2.72386	2.61895	3.42882
CGA - Arg	0.96664	1.01228	1.07678	1.07523	1.08001	1.0705
CGC - Arg	0.903508	0.843207	1.01643	0.998751	1.08178	1.27324
CGT - Arg	0.8838	0.707433	0.867156	0.910115	0.941014	1.08436
CGG - Arg	0.821798	0.730505	0.921625	0.892094	0.906625	1.01265
GGG - Gly	0.813508	1.0534	0.886763	0.900851	0.803886	0.907214
GGA - Gly	1.12923	1.39286	1.17562	1.19434	1.04801	1.01826
GGC - Gly	0.765795	0.828302	0.882134	0.848705	0.884053	1.0246
GGT - Gly	0.776009	0.852608	0.739048	0.743882	0.760721	0.933822
GTA - Val	0.869177	0.886073	0.960132	0.9369	0.92627	0.856555
GTC - Val	0.893485	1.01255	1.08373	0.893082	0.967497	0.981993
GTG - Val	0.778274	0.721639	0.859149	0.858298	0.830093	0.888241
GTT - Val	0.83215	0.937133	0.980329	0.856274	0.921297	0.879685
GAG - Glu	1.05655	1.36037	0.975423	1.02324	0.924007	0.85011
GAA - Glu	1.061	1.41221	0.986721	1.16953	0.996351	0.865497
AAG - Lys	1.0124	1.02161	0.872071	0.93692	0.970835	1.05079
AAA - Lys	0.900866	0.573045	0.800703	0.953002	0.940111	0.734427
AAC - Asn	1.20923	1.16163	1.05695	1.04767	1.1294	0.929608
AAT - Asn	1.14766	1.1289	0.962305	1.01569	1.05153	0.865009
CAT - His	0.934935	0.742126	0.95719	0.909686	0.976347	0.919099
CAC - His	1.02424	0.966276	0.994325	0.950669	0.985173	0.998062
CTT - Gln	0.977436	0.895719	0.999274	0.915558	1.0432	1.12005
CAA - Gln	0.897203	0.62144	0.810681	0.898252	0.911316	0.841255
CAG - Gln	0.929814	0.694133	0.865159	0.840163	0.912572	0.974468
GAC - Asp	1.29934	1.636	1.32076	1.24817	1.24361	1.12304
GAT - Asp	1.25518	1.45603	1.17953	1.13023	1.12693	0.993758
TGT - Cys	0.835968	0.715395	0.742278	0.720678	0.767889	0.826607
TGC - Cys	0.818972	0.753923	0.841941	0.747679	0.807234	0.880757
TTT - Phe	0.845657	0.516802	0.811776	0.776303	0.842958	0.868499
TTC - Phe	0.848898	0.613231	0.858482	0.799613	0.825173	0.879306
TCT - Ser	1.13739	0.90631	0.918466	0.877105	0.935759	1.00754
TCG - Ser	1.15034	1.08611	1.01785	0.947589	1.00073	1.06539
TCC - Ser	1.15939	1.01629	0.979841	0.940984	0.960108	1.04286
AGT - Ser	0.951312	0.804239	0.736844	0.8117	0.832389	0.843083
AGC - Ser	0.914141	0.740806	0.825506	0.821894	0.852101	0.887187
TCA - Ser	1.03508	0.831539	0.950023	0.961067	0.98268	1.01265
GCA - Ala	0.904895	1.01399	0.990658	0.972709	0.972529	1.01943
GCC - Ala	0.860123	0.974693	1.0178	0.929635	0.965853	1.03087
GCG - Ala	0.872836	0.999774	0.974427	0.956042	0.932503	1.05661
GCT - Ala	0.834238	0.883366	0.952758	0.875918	0.934034	1.00772
TGG - Trp	0.93221	0.934825	1.04341	0.98531	1.06932	1.11767
TTA - Leu	0.96768	0.689618	0.983495	0.990227	1.03717	0.964022
TTG - Leu	0.932538	0.698998	0.919741	0.842104	0.934854	0.953323
CTC - Leu	0.938546	0.848201	1.00419	0.935094	1.00724	1.10906
CTA - Leu	1.02648	0.767849	1.0487	0.98657	1.06996	1.09171
CTG - Leu	0.868319	0.717742	0.888113	0.802741	0.862418	0.931694

## Sheet: Panel B
AGA Pausing
relative_location	wtJ_1	wtJ_2	wtJ_3	J_BP1_1	J_BP1_2	J_BP1_3
-5	0.998102	0.950013	0.967815	1.17367	1.06033	0.852896
-4	1.04257	0.988236	0.967385	1.15872	1.01773	0.921721
E	0.950912	0.970393	1.03814	1.23754	1.13079	1.00457
P	0.879521	0.745423	1.05307	1.28136	1.34025	1.09812
A	1.00892	0.842871	1.29049	2.86773	2.62095	3.61306
1	1.0028	0.948464	0.965667	1.17313	1.06928	1.04286
2	0.962405	0.942702	0.923145	1.01213	0.990297	0.903972
