# Supplementary material for: GTPBP1 resolves paused ribosomes to maintain neuronal homeostasis
Source: eLife. 2020 Nov 13;9:e62731. doi: 10.7554/eLife.62731 (PMC7665888; doi:10.7554/eLife.62731)
Supplement: Figure 3—source data 1. [file elife-62731-fig3-data1.xlsx]

## Sheet: Panel C
	P21										P21
	Cerebellum	RPS6	P-RPS6	P-RPS6/RPS6	relative ratio			mean	SD		Cerebellum	P-Eif2a	Eif2a	P-Eif2a/Eif2a	relative ratio			mean	SD
	B6J (1)	11009.6	14137.4	1.2841	0.779554		B6J	1	0.191275		B6J (1)	10086.1	28134.2	0.358501	0.960864		B6J	1	0.108174
	Gtpbp1 (1)	8699.15	14074.8	1.61795	0.982229		Gtpbp1	0.943294	0.0841384		Gtpbp1 (1)	9431.58	13850.4	0.680962	1.82513		Gtpbp1	1.98425	0.137999
	NMF205 (1)	6026.55	7662.89	1.27152	0.771918		NMF205	0.835086	0.087501		NMF205 (1)	8767.02	13491.6	0.649812	1.74165		NMF205	1.88723	0.234694
	B6J (2)	4579.13	8285.33	1.80937	1.09843						B6J (2)	4085.2	11942.4	0.342075	0.91684
	Gtpbp1 (2)	10884.5	15181.4	1.39477	0.84674						Gtpbp1 (2)	15411.1	20085.7	0.767269	2.05646
	NMF205 (2)	5964.45	7843.89	1.31511	0.798378						NMF205 (2)	8162.07	10137.4	0.805145	2.15797
	B6J (3)	7767.2	14355.4	1.84821	1.12201						B6J (3)	9914.55	23677.6	0.418731	1.1223
	Gtpbp1 (3)	8046.91	13267.2	1.64873	1.00091						Gtpbp1 (3)	15709.8	20329.5	0.772758	2.07117
	NMF205 (3)	9778.86	15060.3	1.54009	0.934962						NMF205 (3)	12781.8	19442.1	0.657431	1.76207
	Hippocampus	RPS6	P-RPS6	P-RPS6/RPS6	relative ratio			mean	SD		Hippocampus	P-Eif2a	Eif2a	P-Eif2a/Eif2a	relative ratio			mean	SD
	B6J (1)	2780.3	13201.4	4.74818	0.954586		B6J	1.01566	0.0589755		B6J (1)	2631.62	9430.48	0.279055	0.955626		B6J	1	0.0392824
	Gtpbp1 (1)	3125.89	792.406	0.253498	0.0731872		Gtpbp1	0.136199	0.0650678		Gtpbp1 (1)	11143.3	12761	0.87323	2.99039		Gtpbp1	2.63055	0.3475
	NMF205 (1)	10544	3371.43	0.319747	0.0972147		NMF205	0.0532736	0.0444137		NMF205 (1)	18646.8	27800	0.670748	2.29698		NMF205	2.29884	0.462278
	B6J (2)	1968.18	10295.2	5.23082	1.07228						B6J (2)	1151.13	3887.48	0.296113	1.01404
	Gtpbp1 (2)	4724.18	3305.28	0.699652	0.203144						Gtpbp1 (2)	7310.41	10899.5	0.670713	2.29687
	NMF205 (2)	3923.96	689.991	0.17584	0.0542041						NMF205 (2)	9318.92	17367.6	0.536569	1.83749
	B6J (3)	3220.89	15921.6	4.94323	1.02013						B6J (3)	6855.51	22785.7	0.300869	1.03033
	Gtpbp1 (3)	10059.7	6447.48	0.640922	0.132266						Gtpbp1 (3)	13073.4	17190	0.76052	2.60441
	NMF205 (3)	9843.15	400.749	0.0407135	0.00840197						NMF205 (3)	26068.3	32320.8	0.806549	2.76204

## Sheet: Panel F
Granule Cells
P35
lobule VI
#1 Gtpbp1	section #1	402		#1 Gtpbp1, Gcn2	section #1	238		#1 B6J	section #1	506
	section #2	364			section #2	244			section #2	512
	section #3	387			section #3	212			section #3	539
	mean	384.333			mean	231.333			mean	519
#2 Gtpbp1	section #1	348		#2 Gtpbp1, Gcn2	section #1	270		#2 B6J	section #1	489
	section #2	322			section #2	268			section #2	528
	section #3	364			section #3	242			section #3	542
	mean	344.667			mean	260			mean	519.667
#3 Gtpbp1	section #1	348		#3 Gtpbp1, Gcn2	section #1	258		#3 B6J	section #1	506
	section #2	370			section #2	240			section #2	534
	section #3	352			section #3	266			section #3	551
	mean	356.667			mean	254.667			mean	530.333
Granule Cells
P35
lobule IX
#1 Gtpbp1	section #1	374		#1 Gtpbp1, Gcn2	section #1	198		#1 B6J	section #1	493
	section #2	352			section #2	168			section #2	528
	section #3	344			section #3	170			section #3	542
	mean	356.667			mean	178.667			mean	521
#2 Gtpbp1	section #1	302		#2 Gtpbp1, Gcn2	section #1	202		#2 B6J	section #1	503
	section #2	298			section #2	196			section #2	512
	section #3	320			section #3	178			section #3	520
	mean	306.667			mean	192			mean	511.667
#3 Gtpbp1	section #1	288		#3 Gtpbp1, Gcn2	section #1	184		#3 B6J	section #1	497
	section #2	306			section #2	160			section #2	485
	section #3	298			section #3	178			section #3	520
	mean	297.333			mean	174			mean	500.667

## Sheet: Panel G
% pyknotic cells
P35
DG
		pyknotic cells	total cells	%				pyknotic cells	total cells	%				pyknotic cells	total cells	%
#1 Gtpbp1	section #1	23	824	2.79126		#1 Gtpbp1, Gcn2	section #1	38	777	4.8906		#1 B6J	section #1	2	1175	0.170213
	section #2	11	704	1.5625			section #2	64	842	7.60095			section #2	0	965	0
	section #3	22	767	2.86832			section #3	55	731	7.52394			section #3	1	1059	0.0944287
			mean	2.40736					mean	6.67183					mean	0.0882138
#2 Gtpbp1	section #1	14	633	2.21169		#2 Gtpbp1, Gcn2	section #1	39	795	4.90566		#2 B6J	section #1	0	1008	0
	section #2	12	782	1.53453			section #2	48	804	5.97015			section #2	1	976	0.102459
	section #3	13	676	1.92308			section #3	47	821	5.72473			section #3	0	1035	0
			mean	1.88976					mean	5.53351					mean	0.034153
#3 Gtpbp1	section #1	25	752	3.32447		#3 Gtpbp1, Gcn2	section #1	48	925	5.18919		#3 B6J	section #1	1	987	0.101317
	section #2	11	831	1.32371			section #2	44	818	5.37897			section #2	2	1192	0.167785
	section #3	22	698	3.15186			section #3	37	897	4.12486			section #3	2	1316	0.151976
			mean	2.60001					mean	4.89767					mean	0.140359
% pyknotic cells
P35
CA1
		pyknotic cells	total cells	%				pyknotic cells	total cells	%				pyknotic cells	total cells	%
#1 Gtpbp1	section #1	0	299	0		#1 Gtpbp1, Gcn2	section #1	27	282	9.57447		#1 B6J	section #1	0	294	0
	section #2	0	282	0			section #2	29	290	10			section #2	0	369	0
	section #3	0	319	0			section #3	39	283	13.7809			section #3	0	338	0
			mean	0					mean	11.1185					mean	0
#2 Gtpbp1	section #1	0	370	0		#2 Gtpbp1, Gcn2	section #1	43	380	11.3158		#2 B6J	section #1	0	305	0
	section #2	0	354	0			section #2	32	350	9.14286			section #2	0	345	0
	section #3	0	325	0			section #3	37	331	11.1782			section #3	0	381	0
			mean	0					mean	10.5456					mean	0
#3 Gtpbp1	section #1	0	387	0		#3 Gtpbp1, Gcn2	section #1	24	351	6.83761		#3 B6J	section #1	0	367	0
	section #2	0	325	0			section #2	29	392	7.39796			section #2	0	297	0
	section #3	0	305	0			section #3	41	303	13.5314			section #3	0	302	0
			mean	0					mean	9.25564					mean	0
