# Supplementary material for: GTPBP1 resolves paused ribosomes to maintain neuronal homeostasis
Source: eLife. 2020 Nov 13;9:e62731. doi: 10.7554/eLife.62731 (PMC7665888; doi:10.7554/eLife.62731)
Supplement: Figure 4—figure supplement 1—source data 1. [file elife-62731-fig4-figsupp1-data1.xlsx]

## Sheet: Panel E and F
P21 cerebellum
Rapamycin P14-P21
		RPS6	P-RPS6	P-RPS6/RPS6	relative ratio			mean	SD
	B6J (1)	20013.3	52458.2	2.62117	1.1325		B6J	1	0.128907
	B6J (2)	24804.7	50235.1	2.02523	0.875018		B6J (R)	0.132624	0.108479
	B6J (3)	21132.7	48543.7	2.29709	0.99248		BP1	0.909416	0.0848679
	B6J (1) Rapa.	21978.6	12103.6	0.550702	0.237936		BP1 (R)	0.13517	0.0754156
	B6J (2) Rapa.	27602.9	1356.55	0.0491452	0.0212336
	B6J (3) Rapa.	28412.3	9121.15	0.321028	0.138703
	BP1 (1)	18249.3	42072.2	2.30541	0.996076
	BP1 (2)	20349	42656.9	2.09627	0.905712
	BP1 (3)	22281.1	42620.2	1.91284	0.826461
	BP1 (1) Rapa.	26647	13044.7	0.489538	0.211509
	BP1 (2) Rapa.	19850.4	2789.4	0.140521	0.0607133
	BP1 (3) Rapa.	22501.4	6941.49	0.308492	0.133287
P21 cerebellum
Rapamycin P14-P21
		RPS6	P-RPS6	P-RPS6/RPS6	relative ratio			mean	SD
	B6J (1)	26883.4	30478.6	1.13373	0.976043		B6J	1	0.185887
	B6J (2)	35827.8	34427	0.960904	0.827253		B6J (R)	0.1553	0.0868026
	B6J (3)	26017.7	36165.7	1.39004	1.1967		205	1.06062	0.0931073
	B6J (1) Rapa.	30896.6	4610.05	0.149209	0.128456		205 (R)	0.215145	0.17402
	B6J (2) Rapa.	37335.8	3690.22	0.0988387	0.0850914
	B6J (3) Rapa.	37575.8	11014.4	0.293124	0.252354
	205 (1)	23604.4	30524.9	1.29319	1.11332
	205 (2)	27174.6	30085.1	1.10711	0.953119
	205 (3)	27546.5	35690.4	1.29564	1.11543
	205 (1) Rapa.	18061	360.435	0.0199565	0.0171808
	205 (2) Rapa.	24183.7	9662.51	0.399546	0.343973
	205 (3) Rapa.	38954.9	12863.2	0.330208	0.28428

## Sheet: Panel G
	P21											P21													P21
		ct					delta ct						ct						delta ct							ct				delta ct
		"Actin"	Ddr2	Eif4ebp1	ATF4		Ddr2	Eif4ebp1	ATF4				"Actin"	Sesn2	Chac1	Mthfd2	Cyb5r1		Sesn2	Chac1	Mthfd2	Cyb5r1				"Actin"	Asns	Aldh1l2		Asns	Aldh1l2
	B6J (1) Rapa.	17.21	23.97	25.34	21.25		-6.76	-8.13	-4.04			B6J (1) Rapa.	17.89	24.2	27.31	23.28	23.27		-6.31	-9.42	-5.39	-5.38			B6J (1) Rapa.	17.36	20.6	24.8		-3.24	-7.44
	B6J (2) Rapa.	17.76	24.93	25.23	21.3		-7.17	-7.47	-3.54			B6J (2) Rapa.	18.03	24.27	27.89	23.48	23.44		-6.24	-9.86	-5.45	-5.41			B6J (2) Rapa.	17.96	20.82	25.24		-2.86	-7.28
	B6J (3) Rapa.	17.71	24.31	25.53	21.47		-6.6	-7.82	-3.76			B6J (3) Rapa.	18.12	24.42	28	23.62	23.36		-6.3	-9.88	-5.5	-5.24			B6J (3) Rapa.	17.93	21.09	25.22		-3.16	-7.29
	BP1 (1) Rapa.	17.78	21.73	20.89	19.75		-3.95	-3.11	-1.97			BP1 (1) Rapa.	18.12	20.33	24.9	20.41	20.57		-2.21	-6.78	-2.29	-2.45			BP1 (1) Rapa.	17.91	18.73	21.94		-0.82	-4.03
	BP1 (2) Rapa.	17.61	21.3	20.77	19.45		-3.69	-3.16	-1.84			BP1 (2) Rapa.	17.84	20.25	24.05	19.85	20.45		-2.41	-6.21	-2.01	-2.61			BP1 (2) Rapa.	17.9	18.27	22.15		-0.37	-4.25
	BP1 (3) Rapa.	18.01	21.94	20.94	19.73		-3.93	-2.93	-1.72			BP1 (3) Rapa.	17.98	20.23	24.66	20	20.47		-2.25	-6.68	-2.02	-2.49			BP1 (3) Rapa.	18.16	18.61	22.26		-0.45	-4.1
	205 (1) Rapa.	17.59	21.65	20.89	19.19		-4.06	-3.3	-1.6			205 (1) Rapa.	17.99	20.38	24.89	19.99	20.48		-2.39	-6.9	-2	-2.49			205 (1) Rapa.	17.88	18.37	22.2		-0.49	-4.32
	205 (2) Rapa.	17.25	21.21	20.42	19		-3.96	-3.17	-1.75			205 (2) Rapa.	17.93	20.68	24.2	20.53	20.8		-2.75	-6.27	-2.6	-2.87			205 (2) Rapa.	17.51	18.27	21.99		-0.76	-4.48
	205 (3) Rapa.	17.12	21.43	20.49	19.4		-4.31	-3.37	-2.28			205 (3) Rapa.	18.01	20.24	24.31	20.41	20.93		-2.23	-6.3	-2.4	-2.92			205 (3) Rapa.	17.44	18.3	21.83		-0.86	-4.39
	B6J (1)	17.65	24.95	25.71	21.29		-7.3	-8.06	-3.64			B6J (1)	18.23	24.58	30.67	23.37	23.35		-6.35	-12.44	-5.14	-5.12			B6J (1)	17.9	20.58	24.82		-2.68	-6.92
	B6J (2)	17.15	24.65	24.76	21.03		-7.5	-7.61	-3.88			B6J (2)	17.97	24.92	30.93	23.21	23.26		-6.95	-12.96	-5.24	-5.29			B6J (2)	17.97	20.49	24.95		-2.52	-6.98
	B6J (3)	17.54	24.87	25.33	21.13		-7.33	-7.79	-3.59			B6J (3)	18.03	24.65	30.32	23.05	23.28		-6.62	-12.29	-5.02	-5.25			B6J (3)	17.92	20.6	25.02		-2.68	-7.1
	BP1 (1)	17.74	21.85	20.97	19.53		-4.11	-3.23	-1.79			BP1 (1)	17.9	20.83	27.04	20.36	20.57		-2.93	-9.14	-2.46	-2.67			BP1 (1)	17.91	18.14	21.83		-0.23	-3.92
	BP1 (2)	17.69	21.79	20.83	19.15		-4.1	-3.14	-1.46			BP1 (2)	18.03	20.89	27.11	20.08	20.08		-2.86	-9.08	-2.05	-2.05			BP1 (2)	18.03	17.91	21.87		0.12	-3.84
	BP1 (3)	17.53	21.94	20.78	19.38		-4.41	-3.25	-1.85			BP1 (3)	17.92	20.71	26.93	20.19	20.4		-2.79	-9.01	-2.27	-2.48			BP1 (3)	17.66	18	21.84		-0.34	-4.18
	205 (1)	17.34	21.94	20.76	18.73		-4.6	-3.42	-1.39			205 (1)	18.09	20.79	27.5	20.22	20.03		-2.7	-9.41	-2.13	-1.94			205 (1)	17.68	18.06	21.89		-0.38	-4.21
	205 (2)	17.48	21.87	20.63	18.78		-4.39	-3.15	-1.3			205 (2)	18.37	21.08	27.83	20.72	20.84		-2.71	-9.46	-2.35	-2.47			205 (2)	17.93	18.18	22.13		-0.25	-4.2
	205 (3)	17.23	21.3	20.7	19.1		-4.07	-3.47	-1.87			205 (3)	18.01	20.88	27.13	20.09	19.96		-2.87	-9.12	-2.08	-1.95			205 (3)	17.53	17.91	21.46		-0.38	-3.93
			delta - delta ct				fold change							delta - delta ct					fold change								delta - delta ct			fold change
			Ddr2	Eif4ebp1	ATF4		Ddr2	Eif4ebp1	ATF4					Sesn2	Chac1	Mthfd2	Cyb5r1		Sesn2	Chac1	Mthfd2	Cyb5r1					Asns	Aldh1l2		Asns	Aldh1l2
	B6J (1) Rapa.		0.0833333	-0.323333	-0.26		1.05946	0.799221	0.835088			B6J (1) Rapa.		-0.0266667	0.3	0.0566667	-0.0366667		0.981686	1.23114	1.04006	0.974905			B6J (1) Rapa.		-0.153333	-0.103333		0.899171	0.93088
	B6J (2) Rapa.		-0.326667	0.336667	0.24		0.797377	1.26284	1.18099			B6J (2) Rapa.		0.0433333	-0.14	-0.00333333	-0.0666667		1.03049	0.907519	0.997692	0.954842			B6J (2) Rapa.		0.226667	0.0566667		1.17013	1.04006
	B6J (3) Rapa.		0.243333	-0.0133333	0.02		1.18372	0.990801	1.01396			B6J (3) Rapa.		-0.0166667	-0.16	-0.0533333	0.103333		0.988514	0.895025	0.963707	1.07425			B6J (3) Rapa.		-0.0733333	0.0466667		0.950439	1.03288
	BP1 (1) Rapa.		2.89333	4.69667	1.81		7.42985	25.9321	3.50642			BP1 (1) Rapa.		4.07333	2.94	3.15667	2.89333		16.8343	7.67411	8.91767	7.42985			BP1 (1) Rapa.		2.26667	3.30667		4.8121	9.89477
	BP1 (2) Rapa.		3.15333	4.64667	1.94		8.89709	25.0487	3.83706			BP1 (2) Rapa.		3.87333	3.51	3.43667	2.73333		14.6551	11.3924	10.8278	6.6499			BP1 (2) Rapa.		2.71667	3.08667		6.57352	8.49531
	BP1 (3) Rapa.		2.91333	4.87667	2.06		7.53357	29.378	4.16986			BP1 (3) Rapa.		4.03333	3.04	3.42667	2.85333		16.374	8.22491	10.753	7.22668			BP1 (3) Rapa.		2.63667	3.23667		6.21893	9.42614
	205 (1) Rapa.		2.78333	4.50667	2.18		6.88441	22.7322	4.53154			205 (1) Rapa.		3.89333	2.82	3.44667	2.85333		14.8597	7.06162	10.9031	7.22668			205 (1) Rapa.		2.59667	3.01667		6.04887	8.09296
	205 (2) Rapa.		2.88333	4.63667	2.03		7.37853	24.8757	4.08405			205 (2) Rapa.		3.53333	3.45	2.84667	2.47333		11.5782	10.9283	7.19336	5.55325			205 (2) Rapa.		2.32667	2.85667		5.01645	7.2434
	205 (3) Rapa.		2.53333	4.43667	1.5		5.78908	21.6556	2.82843			205 (3) Rapa.		4.05333	3.42	3.04667	2.42333		16.6026	10.7034	8.26301	5.36409			205 (3) Rapa.		2.22667	2.94667		4.68051	7.70966
	B6J (1)		0.0766667	-0.24	0.0633333		1.05458	0.846745	1.04488			B6J (1)		0.29	0.123333	-0.00666667	0.1		1.22264	1.08925	0.99539	1.07177			B6J (1)		-0.0533333	0.08		0.963707	1.05702
	B6J (2)		-0.123333	0.21	-0.176667		0.918064	1.15669	0.884745			B6J (2)		-0.31	-0.396667	-0.106667	-0.07		0.806642	0.759611	0.928731	0.952638			B6J (2)		0.106667	0.02		1.07674	1.01396
	B6J (3)		0.0466667	0.03	0.113333		1.03288	1.02101	1.08172			B6J (3)		0.02	0.273333	0.113333	-0.03		1.01396	1.2086	1.08172	0.97942			B6J (3)		-0.0533333	-0.1		0.963707	0.933033
	BP1 (1)		3.26667	4.59	1.91333		9.6242	24.0839	3.76678			BP1 (1)		3.71	3.42333	2.67333	2.55		13.0864	10.7282	6.37901	5.85634			BP1 (1)		2.39667	3.08		5.26585	8.45614
	BP1 (2)		3.27667	4.68	2.24333		9.69114	25.6342	4.7349			BP1 (2)		3.78	3.48333	3.08333	3.17		13.737	11.1838	8.4757	9.00047			BP1 (2)		2.74667	3.16		6.71165	8.9383
	BP1 (3)		2.96667	4.57	1.85333		7.81728	23.7524	3.61334			BP1 (3)		3.85	3.55333	2.86333	2.74		14.42	11.7398	7.27695	6.6807			BP1 (3)		2.28667	2.82		4.87927	7.06162
	205 (1)		2.77667	4.4	2.31333		6.85267	21.1121	4.9703			205 (1)		3.94	3.15333	3.00333	3.28		15.3482	8.89709	8.01851	9.71356			205 (1)		2.24667	2.79		4.74585	6.9163
	205 (2)		2.98667	4.67	2.40333		7.9264	25.4572	5.29024			205 (2)		3.93	3.10333	2.78333	2.75		15.2422	8.59402	6.88441	6.72717			205 (2)		2.37667	2.8		5.19335	6.9644
	205 (3)		3.30667	4.35	1.83333		9.89477	20.393	3.56359			205 (3)		3.77	3.44333	3.05333	3.27		13.6422	10.8779	8.30128	9.64646			205 (3)		2.24667	3.07		4.74585	8.39773
			Ddr2	Eif4ebp1	ATF4									Sesn2	Chac1	Mthfd2	Cyb5r1										Asns	Aldh1l2
	Rapamycin											Rapamycin													Rapamycin
	B6J	rel. fold change	1.01352	1.01762	1.01001							B6J	rel. fold change	1.00023	1.01123	1.00049	1.00133								B6J	rel. fold change	1.00658	1.00127
		SEM	0.0657429	0.0776559	0.057662								SEM	0.00880953	0.0635181	0.012751	0.021314									SEM	0.0479795	0.0203557
	BP1	rel. fold change	7.9535	26.7863	3.83778							BP1	rel. fold change	15.9545	9.09714	10.1662	7.10215								BP1	rel. fold change	5.86818	9.27207
		SEM	0.272938	0.762522	0.110574								SEM	0.382856	0.668914	0.360621	0.134871									SEM	0.310541	0.237446
	205	rel. fold change	6.68401	23.0878	3.81467							205	rel. fold change	14.3468	9.56446	8.78649	6.04801								205	rel. fold change	5.24861	7.682
		SEM	0.271152	0.546422	0.29431								SEM	0.850389	0.723477	0.636489	0.341711									SEM	0.237704	0.141818
	untreated											untreated													untreated
	B6J	rel. fold change	1.00184	1.00815	1.00378							B6J	rel. fold change	1.01441	1.01915	1.00195	1.00128								B6J	rel. fold change	1.00138	1.00134
		SEM	0.0244529	0.0517904	0.0349076								SEM	0.0693332	0.0775186	0.0255691	0.0208343									SEM	0.0217527	0.020983
	BP1	rel. fold change	9.04421	24.4902	4.03834							BP1	rel. fold change	13.7478	11.2172	7.37722	7.17917								BP1	rel. fold change	5.61892	8.15202
		SEM	0.354359	0.33485	0.202698								SEM	0.222284	0.168877	0.350645	0.543419									SEM	0.321954	0.324866
	205	rel. fold change	8.22462	22.3208	4.60805							205	rel. fold change	14.7442	9.45635	7.73473	8.69573								205	rel. fold change	4.89502	7.42615
		SEM	0.514273	0.913304	0.306186								SEM	0.318622	0.413474	0.24995	0.568384									SEM	0.0861221	0.280588
