# Supplementary material for: GTPBP1 resolves paused ribosomes to maintain neuronal homeostasis
Source: eLife. 2020 Nov 13;9:e62731. doi: 10.7554/eLife.62731 (PMC7665888; doi:10.7554/eLife.62731)
Supplement: Figure 4—figure supplement 2—source data 1. [file elife-62731-fig4-figsupp2-data1.xlsx]

## Sheet: Panel B
# pyknotic cells
P28
cortex
#1 Gtpbp1 (R)	section #1	152		#1 Gtpbp1 (V)	section #1	44		#1 NMF205 (R)	section #1	172		#1 NMF205 (V)	section #1	50		#1 B6J (R)	section #1	11		#1 B6J (V)	section #1	10
	section #2	162			section #2	73			section #2	120			section #2	45			section #2	4			section #2	0
	section #3	133			section #3	53			section #3	159			section #3	37			section #3	12			section #3	5
	mean	149			mean	56.6667			mean	150.333			mean	44			mean	9			mean	5
#2 Gtpbp1 (R)	section #1	116		#2 Gtpbp1 (V)	section #1	58		#2 NMF205 (R)	section #1	208		#2 NMF205 (V)	section #1	18		#2 B6J (R)	section #1	4		#2 B6J (V)	section #1	7
	section #2	225			section #2	53			section #2	141			section #2	35			section #2	0			section #2	0
	section #3	164			section #3	39			section #3	130			section #3	28			section #3	11			section #3	5
	mean	168.333			mean	50			mean	159.667			mean	27			mean	5			mean	4
#3 Gtpbp1 (R)	section #1	151		#3 Gtpbp1 (V)	section #1	67		#3 NMF205 (R)	section #1	138		#3 NMF205 (V)	section #1	35		#3 B6J (R)	section #1	8		#3 B6J (V)	section #1	0
	section #2	161			section #2	55			section #2	160			section #2	49			section #2	3			section #2	10
	section #3	190			section #3	35			section #3	161			section #3	29			section #3	15			section #3	3
	mean	167.333			mean	52.3333			mean	153			mean	37.6667			mean	8.66667			mean	4.33333
Granule Cells
P28
lobule VI
#1 Gtpbp1 (R)	section #1	168		#1 Gtpbp1 (V)	section #1	234		#1 NMF205 (R)	section #1	224		#1 NMF205 (V)	section #1	340		#1 B6J (R)	section #1	410		#1 B6J (V)	section #1	511
	section #2	175			section #2	303			section #2	220			section #2	315			section #2	456			section #2	393
	section #3	203			section #3	291			section #3	173			section #3	327			section #3	393			section #3	425
	mean	182			mean	276			mean	205.667			mean	327.333			mean	419.667			mean	443
#2 Gtpbp1 (R)	section #1	190		#2 Gtpbp1 (V)	section #1	274		#2 NMF205 (R)	section #1	197		#2 NMF205 (V)	section #1	325		#2 B6J (R)	section #1	368		#2 B6J (V)	section #1	390
	section #2	206			section #2	320			section #2	212			section #2	269			section #2	351			section #2	374
	section #3	277			section #3	298			section #3	176			section #3	287			section #3	365			section #3	392
	mean	224.333			mean	297.333			mean	195			mean	293.667			mean	361.333			mean	385.333
#3 Gtpbp1 (R)	section #1	205		#3 Gtpbp1 (V)	section #1	280		#3 NMF205 (R)	section #1	191		#3 NMF205 (V)	section #1	260		#3 B6J (R)	section #1	359		#3 B6J (V)	section #1	380
	section #2	228			section #2	290			section #2	190			section #2	270			section #2	437			section #2	391
	section #3	195			section #3	313			section #3	243			section #3	335			section #3	419			section #3	405
	mean	209.333			mean	294.333			mean	208			mean	288.333			mean	405			mean	392

## Sheet: Panel D and E
# DG cells
P28
#1 Gtpbp1 (R)	section #1	626		#1 Gtpbp1 (V)	section #1	911		#1 NMF205 (R)	section #1	582		#1 NMF205 (V)	section #1	940		#1 B6J (R)	section #1	1165		#1 B6J (V)	section #1	1263
	section #2	484			section #2	864			section #2	672			section #2	963			section #2	1284			section #2	1243
	section #3	406			section #3	801			section #3	578			section #3	786			section #3	1095			section #3	1366
	mean	505.333			mean	858.667			mean	610.667			mean	896.333			mean	1181.33			mean	1290.67
#2 Gtpbp1 (R)	section #1	436		#2 Gtpbp1 (V)	section #1	851		#2 NMF205 (R)	section #1	618		#2 NMF205 (V)	section #1	828		#2 B6J (R)	section #1	1287		#2 B6J (V)	section #1	1254
	section #2	456			section #2	841			section #2	592			section #2	766			section #2	1223			section #2	1189
	section #3	461			section #3	764			section #3	576			section #3	773			section #3	1329			section #3	1287
	mean	451			mean	818.667			mean	595.333			mean	789			mean	1279.67			mean	1243.33
#3 Gtpbp1 (R)	section #1	532		#3 Gtpbp1 (V)	section #1	803		#3 NMF205 (R)	section #1	622		#3 NMF205 (V)	section #1	845		#3 B6J (R)	section #1	1232		#3 B6J (V)	section #1	1327
	section #2	413			section #2	869			section #2	580			section #2	742			section #2	1099			section #2	1259
	section #3	376			section #3	858			section #3	585			section #3	647			section #3	1189			section #3	1216
	mean	440.333			mean	843.333			mean	595.667			mean	744.667			mean	1173.33			mean	1267.33
% pyknotic DG cells
P28
		pyknotic cells	total cells	%				pyknotic cells	total cells	%				pyknotic cells	total cells	%				pyknotic cells	total cells	%				pyknotic cells	total cells	%				pyknotic cells	total cells	%
#1 Gtpbp1 (R)	section #1	132	626	21.0863		#1 Gtpbp1 (V)	section #1	32	911	3.51262		#1 NMF205 (R)	section #1	134	582	23.0241		#1 NMF205 (V)	section #1	37	940	3.93617		#1 B6J (R)	section #1	1	1165	0.0858369		#1 B6J (V)	section #1	0	1263	0
	section #2	111	484	22.9339			section #2	30	864	3.47222			section #2	173	672	25.744			section #2	16	963	1.66147			section #2	1	1284	0.0778816			section #2	0	1243	0
	section #3	103	406	25.3695			section #3	23	801	2.87141			section #3	118	578	20.4152			section #3	21	786	2.67176			section #3	0	1095	0			section #3	1	1366	0.0732064
			mean	23.1299					mean	3.28542					mean	23.0611					mean	2.75647					mean	0.0545728					mean	0.0244021
#2 Gtpbp1 (R)	section #1	101	436	23.1651		#2 Gtpbp1 (V)	section #1	41	851	4.81786		#2 NMF205 (R)	section #1	117	618	18.932		#2 NMF205 (V)	section #1	14	828	1.69082		#2 B6J (R)	section #1	1	1287	0.0777001		#2 B6J (V)	section #1	1	1254	0.0797448
	section #2	107	456	23.4649			section #2	36	841	4.28062			section #2	126	592	21.2838			section #2	42	766	5.48303			section #2	0	1223	0			section #2	0	1189	0
	section #3	95	461	20.6074			section #3	24	764	3.14136			section #3	105	576	18.2292			section #3	37	773	4.78655			section #3	0	1329	0			section #3	0	1287	0
			mean	22.4125					mean	4.07995					mean	19.4817					mean	3.9868					mean	0.0259					mean	0.0265816
#3 Gtpbp1 (R)	section #1	123	532	23.1203		#3 Gtpbp1 (V)	section #1	28	803	3.48692		#3 NMF205 (R)	section #1	155	622	24.9196		#3 NMF205 (V)	section #1	24	845	2.84024		#3 B6J (R)	section #1	1	1232	0.0811688		#3 B6J (V)	section #1	2	1327	0.150716
	section #2	70	413	16.9492			section #2	14	869	1.61105			section #2	145	580	25			section #2	34	742	4.58221			section #2	0	1099	0			section #2	0	1259	0
	section #3	65	376	17.2872			section #3	25	858	2.91375			section #3	173	585	29.5726			section #3	24	647	3.70943			section #3	2	1189	0.168209			section #3	0	1216	0
			mean	19.1189					mean	2.67057					mean	26.4974					mean	3.71063					mean	0.0831258					mean	0.0502386
