# Supplementary material for: GTPBP1 resolves paused ribosomes to maintain neuronal homeostasis
Source: eLife. 2020 Nov 13;9:e62731. doi: 10.7554/eLife.62731 (PMC7665888; doi:10.7554/eLife.62731)
Supplement: Figure 4—source data 1. [file elife-62731-fig4-data1.xlsx]

## Sheet: Panel C
Granule Cells
P28
lobule IX
#1 Gtpbp1 (R)	section #1	224		#1 Gtpbp1 (V)	section #1	355		#1 NMF205 (R)	section #1	166		#1 NMF205 (V)	section #1	307		#1 B6J (R)	section #1	535		#1 B6J (V)	section #1	542
	section #2	205			section #2	329			section #2	217			section #2	331			section #2	597			section #2	511
	section #3	223			section #3	359			section #3	182			section #3	287			section #3	506			section #3	464
	mean	217.333			mean	347.667			mean	188.333			mean	308.333			mean	546			mean	505.667
#2 Gtpbp1 (R)	section #1	224		#2 Gtpbp1 (V)	section #1	305		#2 NMF205 (R)	section #1	161		#2 NMF205 (V)	section #1	330		#2 B6J (R)	section #1	553		#2 B6J (V)	section #1	513
	section #2	183			section #2	270			section #2	177			section #2	292			section #2	490			section #2	507
	section #3	202			section #3	322			section #3	169			section #3	299			section #3	531			section #3	498
	mean	203			mean	299			mean	169			mean	307			mean	524.667			mean	506
#3 Gtpbp1 (R)	section #1	163		#3 Gtpbp1 (V)	section #1	376		#3 NMF205 (R)	section #1	231		#3 NMF205 (V)	section #1	251		#3 B6J (R)	section #1	494		#3 B6J (V)	section #1	623
	section #2	192			section #2	296			section #2	170			section #2	281			section #2	497			section #2	522
	section #3	162			section #3	354			section #3	198			section #3	324			section #3	507			section #3	496
	mean	172.333			mean	342			mean	199.667			mean	285.333			mean	499.333			mean	547
Granule Cells
P28
lobule VI
#1 Gtpbp1 (R)	section #1	168		#1 Gtpbp1 (V)	section #1	234		#1 NMF205 (R)	section #1	224		#1 NMF205 (V)	section #1	340		#1 B6J (R)	section #1	410		#1 B6J (V)	section #1	511
	section #2	175			section #2	303			section #2	220			section #2	315			section #2	456			section #2	393
	section #3	203			section #3	291			section #3	173			section #3	327			section #3	393			section #3	425
	mean	182			mean	276			mean	205.667			mean	327.333			mean	419.667			mean	443
#2 Gtpbp1 (R)	section #1	190		#2 Gtpbp1 (V)	section #1	274		#2 NMF205 (R)	section #1	197		#2 NMF205 (V)	section #1	325		#2 B6J (R)	section #1	368		#2 B6J (V)	section #1	390
	section #2	206			section #2	320			section #2	212			section #2	269			section #2	351			section #2	374
	section #3	277			section #3	298			section #3	176			section #3	287			section #3	365			section #3	392
	mean	224.333			mean	297.333			mean	195			mean	293.667			mean	361.333			mean	385.333
#3 Gtpbp1 (R)	section #1	205		#3 Gtpbp1 (V)	section #1	280		#3 NMF205 (R)	section #1	191		#3 NMF205 (V)	section #1	260		#3 B6J (R)	section #1	359		#3 B6J (V)	section #1	380
	section #2	228			section #2	290			section #2	190			section #2	270			section #2	437			section #2	391
	section #3	195			section #3	313			section #3	243			section #3	335			section #3	419			section #3	405
	mean	209.333			mean	294.333			mean	208			mean	288.333			mean	405			mean	392
