# Supplementary material for: GTPBP1 resolves paused ribosomes to maintain neuronal homeostasis
Source: eLife. 2020 Nov 13;9:e62731. doi: 10.7554/eLife.62731 (PMC7665888; doi:10.7554/eLife.62731)
Supplement: Supplementary file 1. [file elife-62731-supp1.xlsx]

## Sheet: Gtpbp1 Pause gene
gene_id	gene_name	J_BP1_1	J_BP1_2	J_BP1_3
ENSMUSG00000007777	0610009B22Rik	11.689	NA	NA
ENSMUSG00000030663	1110004F10Rik	NA	NA	14.446
ENSMUSG00000019797	1700021F05Rik	NA	NA	19.689
ENSMUSG00000022507	1810013L24Rik	NA	NA	11.465
ENSMUSG00000078784	1810022K09Rik	10.695	15.107	NA
ENSMUSG00000029559	2210016L21Rik	11.7	10.835	NA
ENSMUSG00000046567	4930430F08Rik	NA	11.542	NA
ENSMUSG00000057715	A830018L16Rik	15.062	11.676	NA
ENSMUSG00000037257	Aagab	NA	NA	11.684
ENSMUSG00000057230	Aak1	NA	12.416	10.664
ENSMUSG00000031960	Aars	12.516	NA	15.408
ENSMUSG00000058355	Abce1	NA	NA	11.269
ENSMUSG00000028953	Abcf2	12.468	NA	12.29
ENSMUSG00000024030	Abcg1	10.699	NA	22.516
ENSMUSG00000033157	Abhd10	NA	NA	10.042
ENSMUSG00000032046	Abhd12	NA	NA	15.915
ENSMUSG00000007036	Abhd16a	NA	NA	13.641
ENSMUSG00000047368	Abhd17b	NA	NA	11.03
ENSMUSG00000026782	Abi2	10.305	NA	NA
ENSMUSG00000036138	Acaa1a	NA	10.857	NA
ENSMUSG00000030861	Acadsb	NA	NA	11.365
ENSMUSG00000049076	Acap2	NA	13.923	NA
ENSMUSG00000029033	Acap3	NA	NA	13.324
ENSMUSG00000023328	Ache	NA	NA	12.869
ENSMUSG00000022477	Aco2	NA	10.187	14.788
ENSMUSG00000020333	Acsl6	NA	NA	23.237
ENSMUSG00000029580	Actb	12.572	16.064	22.529
ENSMUSG00000029580	Actb	10.593	11.49	18.318
ENSMUSG00000021076	Actr10	15.83	15.929	21.691
ENSMUSG00000025228	Actr1a	NA	12.255	21.183
ENSMUSG00000020152	Actr2	14.396	21.864	23.594
ENSMUSG00000000532	Acvr1b	NA	NA	12.244
ENSMUSG00000008822	Acyp1	NA	15.083	NA
ENSMUSG00000054693	Adam10	NA	11.433	14.853
ENSMUSG00000020926	Adam11	NA	11.563	NA
ENSMUSG00000020431	Adcy1	11.174	13.235	12.551
ENSMUSG00000029106	Add1	NA	NA	14.806
ENSMUSG00000034730	Adgrb1	NA	11.333	NA
ENSMUSG00000033569	Adgrb3	NA	11.004	NA
ENSMUSG00000028138	Adh5	NA	NA	12.215
ENSMUSG00000026457	Adipor1	NA	11.243	12.007
ENSMUSG00000057134	Ado	NA	NA	20.252
ENSMUSG00000002844	Adprh	11.653	NA	NA
ENSMUSG00000054452	Aes	NA	NA	10.18
ENSMUSG00000025083	Afap1l2	11.081	16.201	22.882
ENSMUSG00000024527	Afg3l2	NA	NA	15.171
ENSMUSG00000049659	Aftph	NA	11.714	NA
ENSMUSG00000031521	Aga	NA	NA	10.355
ENSMUSG00000055013	Agap1	NA	NA	17.115
ENSMUSG00000034254	Agpat1	NA	10.104	12.555
ENSMUSG00000019986	Ahi1	NA	14.807	NA
ENSMUSG00000021037	Ahsa1	NA	13.381	12.486
ENSMUSG00000019806	Aig1	15.348	NA	27.198
ENSMUSG00000028029	Aimp1	NA	NA	17.749
ENSMUSG00000024847	Aip	NA	NA	19.99
ENSMUSG00000029419	Ajm1	NA	11.47	NA
ENSMUSG00000022016	Akap11	NA	13.737	11.031
ENSMUSG00000028692	Akr1a1	NA	17.976	21.814
ENSMUSG00000028743	Akr7a5	NA	NA	10.574
ENSMUSG00000022636	Alcam	NA	16.218	NA
ENSMUSG00000025007	Aldh18a1	13.389	11.858	23.576
ENSMUSG00000026687	Aldh9a1	NA	11.806	NA
ENSMUSG00000017390	Aldoc	23.038	NA	NA
ENSMUSG00000075470	Alg10b	NA	NA	16.551
ENSMUSG00000039887	Alg14	10.104	NA	11.573
ENSMUSG00000039740	Alg2	11.855	NA	32.239
ENSMUSG00000021986	Amer2	NA	NA	14.748
ENSMUSG00000031751	Amfr	NA	NA	17.965
ENSMUSG00000027889	Ampd2	NA	11.299	11.58
ENSMUSG00000021314	Amph	NA	NA	27.312
ENSMUSG00000026965	Anapc2	NA	14.244	NA
ENSMUSG00000022265	Ank	NA	NA	24.867
ENSMUSG00000032826	Ank2	15.327	15.564	20.443
ENSMUSG00000036188	Ankmy2	12.827	NA	NA
ENSMUSG00000049097	Ankrd34a	NA	10.303	NA
ENSMUSG00000058589	Anks1b	14.685	10.772	NA
ENSMUSG00000015749	Anp32e	NA	NA	11.838
ENSMUSG00000004849	Ap1s1	16.109	11.055	19.112
ENSMUSG00000031367	Ap1s2	NA	NA	12.922
ENSMUSG00000002957	Ap2a2	18.146	12.102	13.977
ENSMUSG00000022841	Ap2m1	NA	NA	11.961
ENSMUSG00000020198	Ap3d1	NA	15.61	NA
ENSMUSG00000020955	Ap4s1	NA	13.35	16.89
ENSMUSG00000027193	Api5	NA	11.314	13.872
ENSMUSG00000006651	Aplp1	NA	11.917	13.057
ENSMUSG00000031996	Aplp2	21.49	13.197	10.965
ENSMUSG00000037787	Apopt1	NA	NA	10.91
ENSMUSG00000022892	App	30.086	33.359	39.995
ENSMUSG00000018481	Appbp2	13.779	16.105	13.294
ENSMUSG00000040760	Appl1	NA	NA	12.068
ENSMUSG00000001127	Araf	18.493	10.594	NA
ENSMUSG00000051853	Arf3	NA	NA	11.033
ENSMUSG00000021877	Arf4	NA	13.113	24.366
ENSMUSG00000019852	Arfgef3	NA	NA	14.727
ENSMUSG00000035133	Arhgap5	NA	10.77	NA
ENSMUSG00000025132	Arhgdia	NA	NA	12.551
ENSMUSG00000054901	Arhgef33	NA	NA	13.125
ENSMUSG00000031511	Arhgef7	NA	NA	24.598
ENSMUSG00000060904	Arl1	11.816	NA	14.388
ENSMUSG00000027122	Arl14ep	NA	NA	30.393
ENSMUSG00000025035	Arl3	NA	NA	14.325
ENSMUSG00000030654	Arl6ip1	13.39	17.119	16.211
ENSMUSG00000026426	Arl8a	NA	NA	16.858
ENSMUSG00000030105	Arl8b	10.073	18.529	19.748
ENSMUSG00000032468	Armc8	NA	NA	13.234
ENSMUSG00000029621	Arpc1a	NA	NA	38.707
ENSMUSG00000026755	Arpc5l	11.66	NA	20.592
ENSMUSG00000029752	Asns	19.26	16.994	27.258
ENSMUSG00000028207	Asph	24.462	12.9	14.455
ENSMUSG00000026587	Astn1	NA	NA	13.019
ENSMUSG00000028373	Astn2	NA	14.021	25.369
ENSMUSG00000013662	Atad1	NA	NA	15.846
ENSMUSG00000034958	Atcay	NA	NA	13.166
ENSMUSG00000026663	Atf6	NA	12.95	NA
ENSMUSG00000022663	Atg3	NA	12.101	16.422
ENSMUSG00000026280	Atg4b	NA	NA	10.367
ENSMUSG00000021066	Atl1	NA	11.19	29.617
ENSMUSG00000059811	Atl2	13.587	NA	NA
ENSMUSG00000033161	Atp1a1	30.43	36.695	103.344
ENSMUSG00000040907	Atp1a3	10.033	NA	NA
ENSMUSG00000026576	Atp1b1	NA	16.801	61.42
ENSMUSG00000041329	Atp1b2	12.367	NA	38.788
ENSMUSG00000029467	Atp2a2	14.103	17.249	16.468
ENSMUSG00000019943	Atp2b1	10.835	16.952	17.744
ENSMUSG00000031376	Atp2b3	13.158	15.898	19.504
ENSMUSG00000025428	Atp5a1	27.11	29.341	55.306
ENSMUSG00000025393	Atp5b	21.031	29.759	68.789
ENSMUSG00000025781	Atp5c1	NA	NA	19.448
ENSMUSG00000000563	Atp5f1	NA	12.544	NA
ENSMUSG00000018770	Atp5g3	21.102	33.13	15.201
ENSMUSG00000022890	Atp5j	16.213	15.497	28.885
ENSMUSG00000038690	Atp5j2	NA	10.283	41.612
ENSMUSG00000021290	Atp5mpl	NA	NA	12.977
ENSMUSG00000019087	Atp6ap1	11.74	NA	10.925
ENSMUSG00000031007	Atp6ap2	14.005	NA	13.212
ENSMUSG00000033379	Atp6v0b	NA	10.236	22.369
ENSMUSG00000052459	Atp6v1a	NA	15.139	26.704
ENSMUSG00000006273	Atp6v1b2	16.812	26.62	32.514
ENSMUSG00000022295	Atp6v1c1	10.12	17.228	11.821
ENSMUSG00000021114	Atp6v1d	10.309	NA	NA
ENSMUSG00000019210	Atp6v1e1	NA	NA	33.35
ENSMUSG00000037685	Atp8a1	NA	12.231	13.533
ENSMUSG00000027546	Atp9a	NA	NA	16.416
ENSMUSG00000027312	Atrn	NA	NA	12.71
ENSMUSG00000016541	Atxn10	NA	20.679	16.468
ENSMUSG00000032637	Atxn2l	NA	NA	15.284
ENSMUSG00000021460	Auh	NA	NA	13.891
ENSMUSG00000018821	Avpi1	NA	10.442	NA
ENSMUSG00000039182	AW209491	NA	13.962	NA
ENSMUSG00000045767	B230219D22Rik	NA	11.043	14.505
ENSMUSG00000060802	B2m	NA	NA	10.571
ENSMUSG00000043300	B3galnt1	NA	11.692	25.833
ENSMUSG00000033849	B3galt2	NA	14.754	NA
ENSMUSG00000056124	B4galt6	NA	NA	21.702
ENSMUSG00000024392	Bag6	NA	15.428	13.817
ENSMUSG00000021901	Bap1	NA	11.885	NA
ENSMUSG00000003873	Bax	NA	NA	10.71
ENSMUSG00000025235	Bbs4	NA	NA	10.333
ENSMUSG00000031955	Bcar1	NA	NA	11.929
ENSMUSG00000030268	Bcat1	NA	13.215	NA
ENSMUSG00000022508	Bcl6	18.65	20.631	16.265
ENSMUSG00000037608	Bclaf1	14.359	15.043	NA
ENSMUSG00000050071	Bex1	10.829	NA	15.571
ENSMUSG00000042750	Bex2	15.562	15.07	28.091
ENSMUSG00000030103	Bhlhe40	NA	NA	17.93
ENSMUSG00000030256	Bhlhe41	NA	15.211	16.628
ENSMUSG00000024381	Bin1	NA	NA	13.093
ENSMUSG00000020840	Blmh	10.22	17.498	13.159
ENSMUSG00000067336	Bmpr2	10.205	11.101	20.045
ENSMUSG00000078566	Bnip3	NA	11.226	NA
ENSMUSG00000022051	Bnip3l	NA	NA	10.829
ENSMUSG00000047721	Bola2	NA	NA	19.703
ENSMUSG00000022557	Bop1	NA	NA	10.485
ENSMUSG00000002413	Braf	NA	11.055	NA
ENSMUSG00000028351	Brinp1	NA	11.749	21.911
ENSMUSG00000033940	Brk1	10.043	NA	NA
ENSMUSG00000035390	Brsk1	NA	10.529	NA
ENSMUSG00000071657	Bscl2	11.597	11.832	11.557
ENSMUSG00000023175	Bsg	17.188	27.918	12.885
ENSMUSG00000111375	Btbd8	13.91	15.698	NA
ENSMUSG00000021660	Btf3	12.102	NA	NA
ENSMUSG00000036478	Btg1	16.923	19.649	NA
ENSMUSG00000066979	Bub3	14.061	NA	15.617
ENSMUSG00000038722	Bud31	10.916	NA	NA
ENSMUSG00000051223	Bzw1	NA	NA	14.919
ENSMUSG00000020547	Bzw2	NA	NA	13.227
ENSMUSG00000000581	C1d	NA	NA	17.171
ENSMUSG00000036707	Cab39	NA	NA	12.496
ENSMUSG00000029544	Cabp1	NA	12.19	NA
ENSMUSG00000034656	Cacna1a	NA	NA	14.664
ENSMUSG00000040118	Cacna2d1	NA	19.371	20.373
ENSMUSG00000021991	Cacna2d3	NA	NA	12.563
ENSMUSG00000066189	Cacng3	14.218	NA	14.672
ENSMUSG00000032076	Cadm1	NA	NA	11.388
ENSMUSG00000064115	Cadm2	NA	10.551	11.755
ENSMUSG00000005338	Cadm3	23.032	37.138	55.671
ENSMUSG00000054793	Cadm4	11.134	13.208	13.783
ENSMUSG00000054423	Cadps	NA	NA	10.997
ENSMUSG00000017978	Cadps2	10.602	12.338	19.867
ENSMUSG00000003657	Calb2	44.21	33.687	42.962
ENSMUSG00000001175	Calm1	26.33	34.793	47.068
ENSMUSG00000036438	Calm2	16.779	10.159	18.421
ENSMUSG00000019370	Calm3	23.674	23.447	46.84
ENSMUSG00000057897	Camk2b	29.211	39.152	17.581
ENSMUSG00000038128	Camk4	NA	14.775	24.16
ENSMUSG00000041570	Camsap2	NA	12.548	NA
ENSMUSG00000014592	Camta1	NA	18.907	24.58
ENSMUSG00000014592	Camta1	12.258	11.396	15.356
ENSMUSG00000020114	Cand1	NA	12.637	14.862
ENSMUSG00000020368	Canx	NA	16.76	26.027
ENSMUSG00000027184	Caprin1	12.084	15.94	25.588
ENSMUSG00000070372	Capza1	NA	NA	10.605
ENSMUSG00000015733	Capza2	11.225	10.682	14.995
ENSMUSG00000028745	Capzb	NA	NA	15.711
ENSMUSG00000056158	Car10	NA	15.147	11.542
ENSMUSG00000041261	Car8	NA	10.21	13.499
ENSMUSG00000060227	Casc4	NA	NA	10.849
ENSMUSG00000015189	Casd1	NA	NA	17.536
ENSMUSG00000035640	Cbarp	NA	NA	20.874
ENSMUSG00000031654	Cbln1	16.204	15.315	18.053
ENSMUSG00000029836	Cbx3	NA	16.358	11.982
ENSMUSG00000039989	Cbx4	NA	12.784	NA
ENSMUSG00000078622	Ccdc47	10.089	10.517	17.76
ENSMUSG00000023572	Ccndbp1	NA	NA	10.814
ENSMUSG00000021548	Ccnh	NA	11.239	16.139
ENSMUSG00000029068	Ccnl2	NA	23.311	NA
ENSMUSG00000034563	Ccpg1	NA	13.124	NA
ENSMUSG00000034024	Cct2	12.302	14.818	11.397
ENSMUSG00000001416	Cct3	10.367	NA	11.279
ENSMUSG00000007739	Cct4	14.532	13.136	20.617
ENSMUSG00000022234	Cct5	NA	NA	12.618
ENSMUSG00000030007	Cct7	NA	10.357	23.737
ENSMUSG00000025613	Cct8	11.538	13.316	22.835
ENSMUSG00000029617	Ccz1	NA	10.475	NA
ENSMUSG00000055447	Cd47	10.192	10.617	14.422
ENSMUSG00000038416	Cdc16	NA	NA	15.999
ENSMUSG00000019471	Cdc37	10.107	NA	16.841
ENSMUSG00000006699	Cdc42	NA	NA	13.62
ENSMUSG00000024304	Cdh2	NA	NA	12.969
ENSMUSG00000030682	Cdipt	NA	NA	16.905
ENSMUSG00000031065	Cdk16	NA	NA	15.681
ENSMUSG00000020015	Cdk17	NA	12.624	15.411
ENSMUSG00000009555	Cdk9	11.184	NA	NA
ENSMUSG00000023067	Cdkn1a	NA	NA	37.959
ENSMUSG00000003031	Cdkn1b	20.106	38.394	54.173
ENSMUSG00000058793	Cds2	NA	NA	15.143
ENSMUSG00000062691	Cebpzos	NA	NA	11.163
ENSMUSG00000068740	Celsr2	NA	11.229	NA
ENSMUSG00000035891	Cerk	NA	12.41	NA
ENSMUSG00000021537	Cetn3	NA	10.824	16.903
ENSMUSG00000031954	Cfdp1	11.855	NA	NA
ENSMUSG00000047710	Champ1	NA	11.232	NA
ENSMUSG00000063787	Chchd1	10.552	NA	NA
ENSMUSG00000070493	Chchd2	10.519	10.631	16.125
ENSMUSG00000021194	Chga	NA	13.929	16.325
ENSMUSG00000027350	Chgb	26.062	33.184	74.31
ENSMUSG00000024843	Chka	NA	14.567	13.714
ENSMUSG00000030077	Chl1	12.356	15.265	17.007
ENSMUSG00000053119	Chmp3	NA	NA	16.591
ENSMUSG00000004633	Chn2	11.38	13.5	31.897
ENSMUSG00000026080	Chst10	10.752	NA	NA
ENSMUSG00000001017	Chtop	NA	10.869	NA
ENSMUSG00000038550	Ciart	NA	NA	10.174
ENSMUSG00000034157	Cipc	10.061	NA	NA
ENSMUSG00000045193	Cirbp	NA	NA	16.912
ENSMUSG00000039910	Cited2	NA	18.988	10.19
ENSMUSG00000040549	Ckap5	NA	10.025	NA
ENSMUSG00000000308	Ckmt1	17.715	11.105	NA
ENSMUSG00000033392	Clasp2	NA	12.863	10.498
ENSMUSG00000004319	Clcn3	10.186	13.585	11.506
ENSMUSG00000000605	Clcn4	NA	NA	25.7
ENSMUSG00000029016	Clcn6	NA	NA	15.242
ENSMUSG00000007041	Clic1	NA	NA	10.516
ENSMUSG00000037242	Clic4	NA	NA	41.513
ENSMUSG00000013921	Clip3	NA	22.419	44.468
ENSMUSG00000026034	Clk1	12.286	14.871	NA
ENSMUSG00000025439	Clns1a	13.276	NA	10.054
ENSMUSG00000021610	Clptm1l	NA	NA	10.646
ENSMUSG00000015357	Clpx	NA	10.382	NA
ENSMUSG00000039953	Clstn1	NA	10.076	28.212
ENSMUSG00000008153	Clstn3	11.018	10.61	NA
ENSMUSG00000028478	Clta	10.538	NA	NA
ENSMUSG00000047126	Cltc	12.267	13.359	24.815
ENSMUSG00000041216	Clvs1	NA	12.133	NA
ENSMUSG00000034390	Cmip	NA	NA	16.735
ENSMUSG00000028719	Cmpk1	NA	NA	28.294
ENSMUSG00000030057	Cnbp	NA	NA	13.029
ENSMUSG00000015759	Cnih1	10.312	NA	NA
ENSMUSG00000025658	Cnksr2	NA	10.935	NA
ENSMUSG00000025189	Cnnm1	NA	NA	16.121
ENSMUSG00000026174	Cnot9	NA	11.137	NA
ENSMUSG00000025381	Cnpy2	10.004	11.6	27.995
ENSMUSG00000044288	Cnr1	10.033	NA	NA
ENSMUSG00000044629	Cnrip1	NA	NA	10.365
ENSMUSG00000038949	Cnst	NA	11.132	NA
ENSMUSG00000055022	Cntn1	NA	10.726	11.642
ENSMUSG00000053024	Cntn2	NA	NA	10.435
ENSMUSG00000030092	Cntn6	12.973	NA	NA
ENSMUSG00000017167	Cntnap1	NA	NA	12.39
ENSMUSG00000039419	Cntnap2	11.631	14.252	21.194
ENSMUSG00000018661	Cog1	NA	12.71	NA
ENSMUSG00000051154	Commd3	24.145	21.82	35.943
ENSMUSG00000026553	Copa	14.168	NA	26.605
ENSMUSG00000030754	Copb1	NA	11.299	13.492
ENSMUSG00000032458	Copb2	10.212	10.426	NA
ENSMUSG00000055681	Cope	NA	NA	10.174
ENSMUSG00000030058	Copg1	NA	NA	11.116
ENSMUSG00000027206	Cops2	NA	NA	19.272
ENSMUSG00000035297	Cops4	NA	NA	22.951
ENSMUSG00000030127	Cops7a	NA	NA	17.128
ENSMUSG00000030652	Coq7	10.688	NA	NA
ENSMUSG00000026489	Coq8a	NA	12.976	NA
ENSMUSG00000030707	Coro1a	12.025	32.998	16.073
ENSMUSG00000041729	Coro2b	11.363	12.717	10.254
ENSMUSG00000091803	Cox16	NA	10.636	NA
ENSMUSG00000031818	Cox4i1	NA	NA	12.068
ENSMUSG00000000088	Cox5a	14.504	16.665	NA
ENSMUSG00000041697	Cox6a1	27.202	12.771	18.057
ENSMUSG00000014313	Cox6c	10.038	18.329	11.063
ENSMUSG00000032330	Cox7a2	NA	NA	64.707
ENSMUSG00000024248	Cox7a2l	NA	10.752	18.22
ENSMUSG00000031231	Cox7b	11.442	NA	12.916
ENSMUSG00000017778	Cox7c	NA	NA	12.223
ENSMUSG00000037852	Cpe	17.759	23.686	17.67
ENSMUSG00000020300	Cpeb4	NA	10.531	11.582
ENSMUSG00000033615	Cplx1	NA	14.8	NA
ENSMUSG00000041781	Cpsf2	NA	11.381	NA
ENSMUSG00000005362	Crbn	NA	11.174	15.867
ENSMUSG00000024146	Cript	NA	11.307	NA
ENSMUSG00000017776	Crk	NA	12.156	NA
ENSMUSG00000027357	Crls1	NA	NA	17.879
ENSMUSG00000029121	Crmp1	11.681	11.263	NA
ENSMUSG00000020038	Cry1	NA	11.175	14.041
ENSMUSG00000068742	Cry2	11.245	NA	16.562
ENSMUSG00000058240	Cryzl1	NA	20.199	14.733
ENSMUSG00000068823	Csde1	13.028	10.811	13.027
ENSMUSG00000002718	Cse1l	NA	NA	13.359
ENSMUSG00000046934	Csl	11.327	10.55	18.112
ENSMUSG00000024576	Csnk1a1	10.616	NA	21.895
ENSMUSG00000074698	Csnk2a1	NA	11.815	17.688
ENSMUSG00000024387	Csnk2b	10.601	NA	NA
ENSMUSG00000027447	Cst3	NA	NA	13.094
ENSMUSG00000031256	Cstf2	NA	10.014	NA
ENSMUSG00000053536	Cstf2t	NA	13.48	15.297
ENSMUSG00000037373	Ctbp1	NA	NA	11.006
ENSMUSG00000030970	Ctbp2	NA	NA	11.265
ENSMUSG00000005698	Ctcf	NA	12.749	NA
ENSMUSG00000018559	Ctdnep1	NA	NA	15.017
ENSMUSG00000006932	Ctnnb1	12.452	NA	17.5
ENSMUSG00000021939	Ctsb	19.401	16.697	12.433
ENSMUSG00000007891	Ctsd	NA	13.315	12.089
ENSMUSG00000031078	Cttn	10.039	NA	10.681
ENSMUSG00000036748	Cuedc2	11.628	12.224	NA
ENSMUSG00000029686	Cul1	NA	NA	14.591
ENSMUSG00000004364	Cul3	10.422	13.806	18.719
ENSMUSG00000031095	Cul4b	NA	13.649	11.545
ENSMUSG00000004096	Cwc15	NA	NA	18.258
ENSMUSG00000031778	Cx3cl1	NA	NA	19.206
ENSMUSG00000026456	Cyb5r1	NA	NA	12.124
ENSMUSG00000022551	Cyc1	21.451	15.611	NA
ENSMUSG00000020340	Cyfip2	NA	NA	29.047
ENSMUSG00000061740	Cyp2d22	NA	11.676	18.424
ENSMUSG00000021259	Cyp46a1	NA	NA	11.585
ENSMUSG00000003269	Cyth2	NA	NA	11.905
ENSMUSG00000056692	D17Wsu92e	NA	NA	10.446
ENSMUSG00000068373	D430041D05Rik	NA	11.772	NA
ENSMUSG00000022174	Dad1	NA	13.817	13.639
ENSMUSG00000039952	Dag1	11.576	NA	NA
ENSMUSG00000068921	Dap3	NA	11.282	NA
ENSMUSG00000026356	Dars	NA	NA	15.519
ENSMUSG00000027797	Dclk1	NA	NA	12.034
ENSMUSG00000028078	Dclk2	NA	11.096	NA
ENSMUSG00000031865	Dctn1	NA	11.501	NA
ENSMUSG00000024603	Dctn4	NA	NA	17.943
ENSMUSG00000031516	Dctn6	NA	NA	12.557
ENSMUSG00000042462	Dctpp1	NA	NA	22.93
ENSMUSG00000024740	Ddb1	NA	NA	15.605
ENSMUSG00000116429	Ddit3	NA	NA	13.914
ENSMUSG00000020108	Ddit4	NA	NA	10.797
ENSMUSG00000003534	Ddr1	NA	NA	11.13
ENSMUSG00000037149	Ddx1	NA	10.844	14.556
ENSMUSG00000055065	Ddx17	NA	12.612	15.348
ENSMUSG00000015023	Ddx19a	NA	NA	15.05
ENSMUSG00000033658	Ddx19b	NA	NA	18.631
ENSMUSG00000041645	Ddx24	NA	NA	22
ENSMUSG00000000787	Ddx3x	NA	13.876	13.201
ENSMUSG00000020719	Ddx5	23.95	20.869	36.393
ENSMUSG00000032097	Ddx6	NA	NA	11.707
ENSMUSG00000023106	Denr	NA	NA	13.566
ENSMUSG00000022365	Derl1	NA	NA	23.96
ENSMUSG00000070738	Dgkd	NA	14.843	15.115
ENSMUSG00000021094	Dhrs7	NA	NA	10.249
ENSMUSG00000042569	Dhrs7b	NA	11.77	NA
ENSMUSG00000029169	Dhx15	NA	10.047	10.609
ENSMUSG00000027770	Dhx36	13.332	NA	NA
ENSMUSG00000042699	Dhx9	10.467	11.306	NA
ENSMUSG00000022848	Dirc2	NA	12.254	NA
ENSMUSG00000040035	Disp2	NA	17.013	24.413
ENSMUSG00000020664	Dld	NA	13.477	10.905
ENSMUSG00000052572	Dlg2	NA	NA	11.22
ENSMUSG00000020886	Dlg4	NA	NA	13.163
ENSMUSG00000004789	Dlst	NA	10.825	13.89
ENSMUSG00000022099	Dmtn	NA	NA	12.725
ENSMUSG00000028410	Dnaja1	NA	NA	12.164
ENSMUSG00000004069	Dnaja3	NA	NA	13.981
ENSMUSG00000020109	Dnajb12	NA	NA	10.685
ENSMUSG00000014905	Dnajb9	NA	NA	16.295
ENSMUSG00000036764	Dnajc12	10.733	NA	NA
ENSMUSG00000022013	Dnajc15	NA	NA	13.688
ENSMUSG00000022136	Dnajc3	NA	10.656	10.402
ENSMUSG00000028528	Dnajc6	NA	NA	12.687
ENSMUSG00000014195	Dnajc7	NA	23.758	10.643
ENSMUSG00000054405	Dnajc8	NA	NA	10.286
ENSMUSG00000036766	Dner	NA	NA	10.097
ENSMUSG00000026825	Dnm1	20.397	19.206	41.869
ENSMUSG00000022789	Dnm1l	NA	13.555	14
ENSMUSG00000078919	Dpm1	NA	10.798	12.661
ENSMUSG00000036815	Dpp10	NA	10.683	NA
ENSMUSG00000061576	Dpp6	NA	15.262	24.898
ENSMUSG00000043671	Dpy19l3	NA	10.33	NA
ENSMUSG00000022048	Dpysl2	NA	12.847	19.725
ENSMUSG00000020457	Drg1	NA	NA	17.254
ENSMUSG00000024302	Dtna	NA	10.234	NA
ENSMUSG00000003518	Dusp3	11.097	11.2	NA
ENSMUSG00000034765	Dusp5	12.81	29.515	31.503
ENSMUSG00000003233	Dvl3	NA	NA	10.874
ENSMUSG00000018707	Dync1h1	12.413	11.919	NA
ENSMUSG00000032435	Dync1li1	NA	NA	12.049
ENSMUSG00000035770	Dync1li2	NA	NA	15.536
ENSMUSG00000057098	Ebf1	NA	15.411	NA
ENSMUSG00000057530	Ece1	NA	NA	10.79
ENSMUSG00000050812	Ecpas	NA	14.18	NA
ENSMUSG00000015092	Edf1	NA	15.651	23.298
ENSMUSG00000034488	Edil3	NA	NA	10.988
ENSMUSG00000037742	Eef1a1	48.363	21.116	33.008
ENSMUSG00000034994	Eef2	12.398	13.007	19.352
ENSMUSG00000024772	Ehd1	NA	NA	15.205
ENSMUSG00000024065	Ehd3	NA	11.265	NA
ENSMUSG00000062762	Ei24	NA	NA	11.261
ENSMUSG00000035530	Eif1	12.895	15.965	17.407
ENSMUSG00000057561	Eif1a	NA	11.519	NA
ENSMUSG00000067194	Eif1ax	NA	13.178	13.846
ENSMUSG00000027810	Eif2a	NA	10.268	19.52
ENSMUSG00000029613	Eif2ak1	NA	NA	15.411
ENSMUSG00000029388	Eif2b1	NA	12.154	NA
ENSMUSG00000074656	Eif2s2	13.694	17.104	NA
ENSMUSG00000035150	Eif2s3x	11.852	11.577	12.256
ENSMUSG00000024991	Eif3a	NA	13.355	12.018
ENSMUSG00000030738	Eif3c	17.042	12.719	24.049
ENSMUSG00000022336	Eif3e	NA	NA	21.264
ENSMUSG00000070319	Eif3g	NA	17.926	19.877
ENSMUSG00000028798	Eif3i	12.514	NA	11.691
ENSMUSG00000027170	Eif3m	NA	NA	10.374
ENSMUSG00000059796	Eif4a1	NA	NA	34.849
ENSMUSG00000022884	Eif4a2	39.878	22.346	16.624
ENSMUSG00000025580	Eif4a3	NA	NA	15.72
ENSMUSG00000058655	Eif4b	NA	11.322	NA
ENSMUSG00000028156	Eif4e	NA	11.629	11.975
ENSMUSG00000005610	Eif4g2	19.688	23.691	17.179
ENSMUSG00000040731	Eif4h	10.356	NA	12.708
ENSMUSG00000027613	Eif6	NA	NA	10.782
ENSMUSG00000036613	Eipr1	10.53	NA	NA
ENSMUSG00000028546	Elavl4	12.617	10.133	10.657
ENSMUSG00000013822	Elof1	NA	10.608	NA
ENSMUSG00000032262	Elovl4	10.791	NA	NA
ENSMUSG00000028431	Elp1	NA	16.017	NA
ENSMUSG00000024271	Elp2	NA	10.106	15.538
ENSMUSG00000047260	Emc6	12.117	NA	NA
ENSMUSG00000055943	Emc7	NA	NA	13.844
ENSMUSG00000058070	Eml1	NA	NA	10.048
ENSMUSG00000063524	Eno1	NA	17.859	12.424
ENSMUSG00000004267	Eno2	NA	19.342	NA
ENSMUSG00000022425	Enpp2	NA	NA	13.655
ENSMUSG00000023960	Enpp5	NA	NA	17.922
ENSMUSG00000038619	Ensa	NA	NA	10.155
ENSMUSG00000095463	Entpd4	NA	NA	11.833
ENSMUSG00000022066	Entpd4b	NA	NA	11.757
ENSMUSG00000032537	Ephb1	NA	11.323	NA
ENSMUSG00000046785	Epm2aip1	NA	14.108	14.568
ENSMUSG00000001036	Epn2	NA	NA	10.701
ENSMUSG00000026615	Eprs	NA	11.776	23.47
ENSMUSG00000028552	Eps15	16.807	17.625	16.317
ENSMUSG00000006276	Eps15l1	NA	14.322	NA
ENSMUSG00000015766	Eps8	10.224	15.753	27.698
ENSMUSG00000001576	Ergic1	NA	NA	15.035
ENSMUSG00000031483	Erlin2	NA	10.104	NA
ENSMUSG00000028343	Erp44	NA	NA	13.972
ENSMUSG00000028967	Errfi1	NA	11.787	NA
ENSMUSG00000021996	Esd	NA	13.805	NA
ENSMUSG00000026610	Esrrg	NA	16.486	NA
ENSMUSG00000040370	Etfrf1	NA	NA	11.545
ENSMUSG00000004151	Etv1	12.266	14.605	38.262
ENSMUSG00000009079	Ewsr1	NA	NA	14.564
ENSMUSG00000034152	Exoc3	NA	10.816	NA
ENSMUSG00000027714	Exosc9	NA	NA	10.566
ENSMUSG00000027963	Extl2	NA	11.192	10.914
ENSMUSG00000052397	Ezr	NA	NA	13.92
ENSMUSG00000010517	Faf1	NA	10.17	NA
ENSMUSG00000025873	Faf2	NA	NA	10.403
ENSMUSG00000045316	Fahd1	NA	10.829	NA
ENSMUSG00000025262	Fam120c	NA	15.649	NA
ENSMUSG00000048388	Fam171b	NA	NA	21.293
ENSMUSG00000051185	Fam174a	10.221	12.841	23.323
ENSMUSG00000031774	Fam192a	NA	15.479	NA
ENSMUSG00000022378	Fam49b	NA	NA	22.694
ENSMUSG00000027349	Fam98b	10.456	NA	NA
ENSMUSG00000026245	Farsb	NA	10.02	NA
ENSMUSG00000055333	Fat2	16.785	26.721	43.351
ENSMUSG00000038274	Fau	NA	NA	26.733
ENSMUSG00000025226	Fbxl15	NA	NA	10.831
ENSMUSG00000022124	Fbxl3	NA	10.964	NA
ENSMUSG00000005371	Fbxo11	NA	15.29	NA
ENSMUSG00000032898	Fbxo21	11.718	NA	NA
ENSMUSG00000032309	Fbxo22	NA	NA	10.643
ENSMUSG00000027180	Fbxo3	NA	11.11	NA
ENSMUSG00000001366	Fbxo9	NA	NA	13.221
ENSMUSG00000020271	Fbxw11	NA	NA	28.823
ENSMUSG00000028086	Fbxw7	NA	18.309	NA
ENSMUSG00000032244	Fem1b	NA	16.098	14.97
ENSMUSG00000032118	Fez1	NA	14.602	11.528
ENSMUSG00000069135	Fgfr1op	NA	10.331	NA
ENSMUSG00000026526	Fh1	NA	NA	26.243
ENSMUSG00000024911	Fibp	NA	NA	11.717
ENSMUSG00000019054	Fis1	NA	10.404	NA
ENSMUSG00000032966	Fkbp1a	NA	NA	14.691
ENSMUSG00000056629	Fkbp2	11.616	12.013	NA
ENSMUSG00000020949	Fkbp3	11.266	NA	NA
ENSMUSG00000032633	Flcn	NA	NA	20.197
ENSMUSG00000040097	Flywch1	NA	10.328	12.073
ENSMUSG00000015994	Fnta	NA	NA	17.048
ENSMUSG00000033373	Fntb	12.874	NA	NA
ENSMUSG00000021250	Fos	13.274	NA	12.827
ENSMUSG00000045589	Frrs1l	10.054	NA	13.005
ENSMUSG00000055932	Fto	NA	10.614	13.178
ENSMUSG00000030795	Fus	11.281	NA	NA
ENSMUSG00000021065	Fut8	NA	NA	16.207
ENSMUSG00000055373	Fut9	NA	NA	13.887
ENSMUSG00000019843	Fyn	NA	NA	15.68
ENSMUSG00000022800	Fyttd1	NA	10.386	NA
ENSMUSG00000041075	Fzd7	11.397	29.793	11.692
ENSMUSG00000020235	Fzr1	NA	11.047	NA
ENSMUSG00000018583	G3bp1	NA	NA	11.674
ENSMUSG00000025579	Gaa	NA	12.609	12.547
ENSMUSG00000031950	Gabarapl2	NA	NA	17.816
ENSMUSG00000024462	Gabbr1	21.245	11.488	13.278
ENSMUSG00000039809	Gabbr2	11.585	NA	NA
ENSMUSG00000010803	Gabra1	22.286	NA	10.53
ENSMUSG00000020428	Gabra6	13.945	19.297	28.6
ENSMUSG00000007653	Gabrb2	NA	12.476	19.737
ENSMUSG00000033676	Gabrb3	13.608	12.779	21.765
ENSMUSG00000029054	Gabrd	NA	NA	15.185
ENSMUSG00000020436	Gabrg2	NA	13.745	19.469
ENSMUSG00000060988	Galnt13	NA	NA	12.903
ENSMUSG00000071650	Ganab	NA	12.97	12.765
ENSMUSG00000047261	Gap43	17.759	22.1	21.397
ENSMUSG00000026867	Gapvd1	NA	10.478	NA
ENSMUSG00000038860	Garnl3	11.561	NA	NA
ENSMUSG00000029777	Gars	21.987	12.301	34.28
ENSMUSG00000033066	Gas7	NA	11.467	11.788
ENSMUSG00000042390	Gatad2b	13.337	12.8	10.989
ENSMUSG00000042390	Gatad2b	11.372	NA	NA
ENSMUSG00000051007	Gatd1	NA	NA	10.121
ENSMUSG00000017943	Gdap1l1	NA	NA	11.184
ENSMUSG00000033917	Gde1	11.601	14.681	16.54
ENSMUSG00000038508	Gdf15	14.413	13.458	30.763
ENSMUSG00000021218	Gdi2	11.46	14.821	18.829
ENSMUSG00000044709	Gemin7	NA	NA	14.967
ENSMUSG00000029992	Gfpt1	NA	12.324	11.943
ENSMUSG00000041028	Ghitm	36.348	29.674	39.802
ENSMUSG00000032252	Glce	NA	11.596	NA
ENSMUSG00000003316	Glg1	12.056	17.391	23.889
ENSMUSG00000028020	Glrb	12.461	16.403	56.385
ENSMUSG00000018196	Glrx2	NA	NA	11.692
ENSMUSG00000031068	Glrx3	NA	NA	10.419
ENSMUSG00000026103	Gls	12.997	NA	NA
ENSMUSG00000022536	Glyr1	NA	18.471	12.706
ENSMUSG00000101523	Gm10031	NA	12.041	17.858
ENSMUSG00000069622	Gm10273	NA	10.559	10.478
ENSMUSG00000070713	Gm10282	15.634	15.619	36.061
ENSMUSG00000092116	Gm10320	NA	20.174	NA
ENSMUSG00000074826	Gm10767	10.559	NA	15.792
ENSMUSG00000078134	Gm12355	11.935	11.628	NA
ENSMUSG00000098559	Gm15013	NA	16.833	26.175
ENSMUSG00000078193	Gm2000	NA	NA	20.407
ENSMUSG00000089739	Gm20431	NA	NA	15.945
ENSMUSG00000021139	Gm20498	14.249	15.276	NA
ENSMUSG00000092232	Gm20521	11.015	12.969	NA
ENSMUSG00000093752	Gm20716	NA	NA	10.926
ENSMUSG00000097239	Gm27029	10.758	11.377	10.35
ENSMUSG00000000948	Gm38393	16.877	22.98	23.554
ENSMUSG00000105204	Gm43738	NA	NA	10.645
ENSMUSG00000109493	Gm45208	11.929	NA	NA
ENSMUSG00000114797	Gm49336	NA	10.753	NA
ENSMUSG00000116358	Gm49450	NA	NA	19.911
ENSMUSG00000107906	Gm5580	13.254	12.058	NA
ENSMUSG00000049124	Gm8186	NA	13.827	15.425
ENSMUSG00000044424	Gm9493	NA	13.414	18.673
ENSMUSG00000062014	Gmfb	NA	11.179	14.176
ENSMUSG00000027823	Gmps	NA	NA	11.233
ENSMUSG00000031748	Gnao1	11.821	13.939	17.132
ENSMUSG00000024639	Gnaq	NA	NA	13.428
ENSMUSG00000029064	Gnb1	NA	10.729	23.819
ENSMUSG00000029713	Gnb2	17.05	NA	12.543
ENSMUSG00000032192	Gnb5	NA	10.285	NA
ENSMUSG00000025266	Gnl3l	16.171	13.516	10.557
ENSMUSG00000034707	Gns	NA	14.478	NA
ENSMUSG00000046519	Golph3l	NA	10.237	NA
ENSMUSG00000030245	Golt1b	NA	11.926	10.636
ENSMUSG00000014959	Gorasp2	NA	NA	16.411
ENSMUSG00000025190	Got1	NA	12.425	24.548
ENSMUSG00000031672	Got2	10.442	16.561	29.49
ENSMUSG00000047454	Gphn	NA	NA	26.12
ENSMUSG00000031148	Gpkow	NA	10.594	NA
ENSMUSG00000031517	Gpm6a	32.456	55.336	27.202
ENSMUSG00000031342	Gpm6b	20.956	NA	NA
ENSMUSG00000029464	Gpn3	NA	NA	16.95
ENSMUSG00000045967	Gpr158	10.03	10.081	21.88
ENSMUSG00000038390	Gpr162	NA	NA	11.806
ENSMUSG00000022131	Gpr180	NA	NA	12.862
ENSMUSG00000043384	Gprasp1	NA	NA	10.232
ENSMUSG00000072966	Gprasp2	NA	13.101	NA
ENSMUSG00000008734	Gprc5b	15.059	18.085	NA
ENSMUSG00000051043	Gprc5c	11.199	NA	23.395
ENSMUSG00000069227	Gprin1	NA	17.348	17.617
ENSMUSG00000025156	Gps1	NA	NA	12.446
ENSMUSG00000040111	Gramd1b	NA	10.224	NA
ENSMUSG00000059923	Grb2	NA	11.049	36.464
ENSMUSG00000072772	Grcc10	NA	NA	15.942
ENSMUSG00000033981	Gria2	NA	NA	16.217
ENSMUSG00000001986	Gria3	NA	11.48	NA
ENSMUSG00000056073	Grik2	NA	NA	15.787
ENSMUSG00000026959	Grin1	NA	NA	12.953
ENSMUSG00000022564	Grina	NA	NA	29.321
ENSMUSG00000063239	Grm4	11.041	13.895	13.885
ENSMUSG00000024580	Grpel2	NA	13.53	NA
ENSMUSG00000044221	Grsf1	10.073	NA	NA
ENSMUSG00000022812	Gsk3b	NA	10.843	NA
ENSMUSG00000031584	Gsr	NA	NA	16.073
ENSMUSG00000025068	Gsto1	NA	NA	11.907
ENSMUSG00000060803	Gstp1	NA	NA	10.363
ENSMUSG00000038155	Gstp2	NA	10.979	11.99
ENSMUSG00000020962	Gtf2a1	NA	NA	12.42
ENSMUSG00000002658	Gtf2f1	10.916	13.837	NA
ENSMUSG00000041303	Gtf3c3	NA	10.006	NA
ENSMUSG00000028005	Gucy1b1	NA	NA	22.549
ENSMUSG00000041126	H2afv	NA	10.687	11.083
ENSMUSG00000060743	H3f3a	23.746	10.849	31.203
ENSMUSG00000016559	H3f3b	33.274	46.134	74.199
ENSMUSG00000021476	Habp4	NA	12.429	NA
ENSMUSG00000035376	Hacd2	NA	NA	11.322
ENSMUSG00000025745	Hadha	NA	NA	12.154
ENSMUSG00000024158	Hagh	12.262	17.174	NA
ENSMUSG00000021730	Hcn1	NA	NA	10.402
ENSMUSG00000019777	Hdac2	11.626	NA	26.087
ENSMUSG00000004897	Hdgf	NA	NA	16.711
ENSMUSG00000029804	Herc3	NA	NA	19.602
ENSMUSG00000031770	Herpud1	10.905	15.773	39.483
ENSMUSG00000008429	Herpud2	NA	NA	10.371
ENSMUSG00000040289	Hey1	NA	NA	24.261
ENSMUSG00000025793	Hgs	NA	11.006	20.616
ENSMUSG00000021109	Hif1a	NA	17.293	15.964
ENSMUSG00000067455	Hist1h4j	13.534	12.323	NA
ENSMUSG00000091405	Hist2h4	NA	NA	37.589
ENSMUSG00000037012	Hk1	NA	20.491	10.134
ENSMUSG00000066551	Hmgb1	35.391	23.614	NA
ENSMUSG00000021670	Hmgcr	NA	NA	14.28
ENSMUSG00000003038	Hmgn2	21.796	16.136	35.926
ENSMUSG00000007836	Hnrnpa0	28.049	24.483	16.465
ENSMUSG00000046434	Hnrnpa1	NA	10.733	11.546
ENSMUSG00000004980	Hnrnpa2b1	13.229	18.566	18.6
ENSMUSG00000020358	Hnrnpab	11.768	10.29	21.42
ENSMUSG00000042079	Hnrnpf	18.01	12.549	11.374
ENSMUSG00000007850	Hnrnph1	18.337	12.308	45.916
ENSMUSG00000045427	Hnrnph2	NA	NA	10.376
ENSMUSG00000020069	Hnrnph3	NA	NA	10.361
ENSMUSG00000015165	Hnrnpl	NA	NA	12.795
ENSMUSG00000066037	Hnrnpr	NA	NA	13.939
ENSMUSG00000039630	Hnrnpu	11.042	NA	22.237
ENSMUSG00000071659	Hnrnpul2	NA	NA	20.824
ENSMUSG00000028759	Hp1bp3	10.801	11.328	10.232
ENSMUSG00000051022	Hs3st1	NA	16.628	20.985
ENSMUSG00000024507	Hsd17b4	NA	10.452	NA
ENSMUSG00000021270	Hsp90aa1	16.153	14.035	25.508
ENSMUSG00000023944	Hsp90ab1	24.613	36.466	NA
ENSMUSG00000020048	Hsp90b1	14.717	10.849	NA
ENSMUSG00000032932	Hspa13	NA	11.265	NA
ENSMUSG00000109865	Hspa14	NA	NA	11.47
ENSMUSG00000020361	Hspa4	NA	11.954	10.634
ENSMUSG00000025757	Hspa4l	NA	NA	10.607
ENSMUSG00000026864	Hspa5	NA	10.354	NA
ENSMUSG00000015656	Hspa8	15.343	11.473	17.93
ENSMUSG00000024359	Hspa9	12.187	13.507	48.653
ENSMUSG00000025980	Hspd1	NA	15.421	22.017
ENSMUSG00000029657	Hsph1	10.519	NA	10.232
ENSMUSG00000067873	Htatsf1	NA	24.951	NA
ENSMUSG00000032115	Hyou1	NA	10.467	NA
ENSMUSG00000027245	Hypk	10.429	NA	10.097
ENSMUSG00000037851	Iars	NA	NA	12.152
ENSMUSG00000020644	Id2	14.032	NA	NA
ENSMUSG00000032279	Idh3a	NA	10.722	NA
ENSMUSG00000035847	Ids	12.464	10.955	NA
ENSMUSG00000023830	Igf2r	NA	16.796	NA
ENSMUSG00000026185	Igfbp5	NA	25.785	NA
ENSMUSG00000040972	Igsf21	10.394	NA	16.155
ENSMUSG00000117081	Igsf5	80.657	93.122	62.038
ENSMUSG00000038034	Igsf8	10.366	NA	NA
ENSMUSG00000024474	Ik	10.48	13.163	20.406
ENSMUSG00000001741	Il16	NA	10.578	18.484
ENSMUSG00000074695	Il22	11.203	NA	NA
ENSMUSG00000001016	Ilf2	12.034	16.085	27.084
ENSMUSG00000090461	Iltifb	11.08	NA	NA
ENSMUSG00000052337	Immt	12.218	NA	10.994
ENSMUSG00000027531	Impa1	12.617	NA	NA
ENSMUSG00000066324	Impad1	NA	NA	10.116
ENSMUSG00000034336	Ina	NA	12.224	11.823
ENSMUSG00000030330	Ing4	NA	10.163	NA
ENSMUSG00000030662	Ipo5	NA	12.144	16.636
ENSMUSG00000066232	Ipo7	10.253	10.754	18.728
ENSMUSG00000041879	Ipo9	10.377	30.362	NA
ENSMUSG00000102422	Iqschfp	24.406	32.272	64.711
ENSMUSG00000034312	Iqsec1	NA	NA	17.348
ENSMUSG00000034168	Irf2bpl	NA	NA	22.831
ENSMUSG00000025825	Iscu	NA	NA	11.006
ENSMUSG00000031703	Itfg1	NA	11.347	NA
ENSMUSG00000001507	Itga3	NA	NA	12.089
ENSMUSG00000022108	Itm2b	16.494	NA	11.44
ENSMUSG00000026223	Itm2c	NA	NA	12.595
ENSMUSG00000030102	Itpr1	12.756	19.927	14.96
ENSMUSG00000027332	Ivd	NA	10.04	NA
ENSMUSG00000028530	Jak1	NA	NA	23.204
ENSMUSG00000063568	Jazf1	NA	17.009	NA
ENSMUSG00000005078	Jkamp	NA	NA	14.18
ENSMUSG00000020737	Jpt1	NA	NA	12.231
ENSMUSG00000001552	Jup	NA	NA	16.341
ENSMUSG00000038909	Kat7	NA	10.192	NA
ENSMUSG00000059486	Kbtbd2	NA	NA	13.983
ENSMUSG00000047976	Kcna1	NA	NA	14.177
ENSMUSG00000040724	Kcna2	NA	NA	15.797
ENSMUSG00000058975	Kcnc1	NA	12.652	NA
ENSMUSG00000060882	Kcnd2	NA	NA	18.634
ENSMUSG00000029088	Kcnip4	11.253	NA	NA
ENSMUSG00000042529	Kcnj12	NA	25.139	50.597
ENSMUSG00000026824	Kcnj3	29.511	46.297	29.2
ENSMUSG00000033998	Kcnk1	NA	14.153	27.226
ENSMUSG00000030685	Kctd13	NA	NA	12.502
ENSMUSG00000016940	Kctd2	NA	12.781	NA
ENSMUSG00000028060	Khdc4	NA	15.739	NA
ENSMUSG00000028790	Khdrbs1	18.446	13.79	20.877
ENSMUSG00000007670	Khsrp	NA	10.388	13.569
ENSMUSG00000036333	Kidins220	NA	15.219	19.835
ENSMUSG00000014602	Kif1a	NA	18.22	16.574
ENSMUSG00000063077	Kif1b	11.023	NA	16.081
ENSMUSG00000036955	Kif1bp	NA	18.466	15.441
ENSMUSG00000022629	Kif21a	NA	11.284	NA
ENSMUSG00000018395	Kif3a	NA	NA	11.964
ENSMUSG00000020668	Kif3c	10.746	NA	NA
ENSMUSG00000006740	Kif5b	NA	NA	15.044
ENSMUSG00000026764	Kif5c	NA	13.617	18.572
ENSMUSG00000026585	Kifap3	NA	NA	10.053
ENSMUSG00000032036	Kirrel3	10.586	15.291	11.417
ENSMUSG00000005672	Kit	14.509	20.519	26.735
ENSMUSG00000021288	Klc1	NA	NA	23.049
ENSMUSG00000024862	Klc2	NA	14.516	18.922
ENSMUSG00000052040	Klf13	NA	NA	19.841
ENSMUSG00000033863	Klf9	NA	14.694	23.515
ENSMUSG00000020978	Klhdc2	11.032	14.81	27.007
ENSMUSG00000048732	Klhl11	NA	NA	12.516
ENSMUSG00000022750	Klhl22	NA	12.511	14.083
ENSMUSG00000042155	Klhl23	NA	NA	12.395
ENSMUSG00000062901	Klhl24	NA	NA	14.131
ENSMUSG00000070923	Klhl9	NA	NA	21.694
ENSMUSG00000066129	Kndc1	NA	12.736	13.924
ENSMUSG00000027782	Kpna4	NA	NA	17.609
ENSMUSG00000030265	Kras	NA	NA	12.037
ENSMUSG00000042747	Krtcap2	12.995	NA	NA
ENSMUSG00000031391	L1cam	NA	19.088	NA
ENSMUSG00000031447	Lamp1	NA	NA	11.034
ENSMUSG00000016534	Lamp2	NA	NA	16.336
ENSMUSG00000062190	Lancl2	12.538	12.144	15.192
ENSMUSG00000024493	Lars	16.865	13.495	NA
ENSMUSG00000030763	Lcmt1	NA	NA	14.608
ENSMUSG00000025223	Ldb1	NA	13.015	NA
ENSMUSG00000042487	Leo1	13.748	14.282	14.673
ENSMUSG00000031513	Leprotl1	NA	NA	13.267
ENSMUSG00000005299	Letm1	NA	NA	12.622
ENSMUSG00000042363	Lgalsl	NA	NA	10.251
ENSMUSG00000067242	Lgi1	NA	10.305	10.348
ENSMUSG00000033595	Lgi3	NA	NA	20.024
ENSMUSG00000050199	Lgr4	NA	NA	11.437
ENSMUSG00000019906	Lin7a	14.576	19.844	33.51
ENSMUSG00000027162	Lin7c	11.365	21.542	15.827
ENSMUSG00000062044	Lmtk3	NA	15.361	NA
ENSMUSG00000023845	Lnpep	NA	20.396	16.413
ENSMUSG00000041168	Lonp1	NA	19.474	NA
ENSMUSG00000048814	Lonrf2	NA	NA	17.338
ENSMUSG00000040249	Lrp1	NA	11.187	NA
ENSMUSG00000022305	Lrp12	NA	14.099	21.953
ENSMUSG00000029103	Lrpap1	NA	NA	17.376
ENSMUSG00000029028	Lrrc47	NA	NA	10.47
ENSMUSG00000027286	Lrrc57	NA	NA	11.965
ENSMUSG00000026305	Lrrfip1	NA	11.884	NA
ENSMUSG00000034648	Lrrn1	NA	12.082	14.537
ENSMUSG00000036295	Lrrn3	NA	NA	11.035
ENSMUSG00000071862	Lrrtm2	NA	10.583	NA
ENSMUSG00000042846	Lrrtm3	11.102	18.703	31.126
ENSMUSG00000037296	Lsm1	NA	NA	11.264
ENSMUSG00000020922	Lsm12	NA	NA	10.276
ENSMUSG00000066568	Lsm14a	NA	NA	13.076
ENSMUSG00000039108	Lsm14b	NA	NA	15.45
ENSMUSG00000044155	Lsm8	NA	NA	14.591
ENSMUSG00000029823	Luc7l2	NA	13	NA
ENSMUSG00000020863	Luc7l3	NA	20.608	NA
ENSMUSG00000028826	Maco1	NA	NA	32.996
ENSMUSG00000022553	Maf1	NA	12.695	NA
ENSMUSG00000036634	Mag	NA	14.254	NA
ENSMUSG00000025151	Maged1	12.802	15.399	19.84
ENSMUSG00000031578	Mak16	NA	11.329	NA
ENSMUSG00000040520	Manea	NA	NA	11.726
ENSMUSG00000027254	Map1a	NA	10.653	10.078
ENSMUSG00000052727	Map1b	10.269	17.351	28.42
ENSMUSG00000031812	Map1lc3b	NA	15.008	21.598
ENSMUSG00000015222	Map2	12.975	10.333	18.253
ENSMUSG00000004936	Map2k1	NA	10.107	10.519
ENSMUSG00000033352	Map2k4	NA	12.9	16.033
ENSMUSG00000023050	Map3k12	NA	NA	10.931
ENSMUSG00000032479	Map4	NA	16.126	NA
ENSMUSG00000063358	Mapk1	12.695	14.544	11.717
ENSMUSG00000046709	Mapk10	NA	16.34	28.368
ENSMUSG00000063065	Mapk3	NA	10.188	NA
ENSMUSG00000021936	Mapk8	12.376	NA	NA
ENSMUSG00000022619	Mapk8ip2	NA	10.339	21.013
ENSMUSG00000027479	Mapre1	NA	12.521	NA
ENSMUSG00000024277	Mapre2	NA	14.722	33.884
ENSMUSG00000023307	March5	NA	NA	17.297
ENSMUSG00000039100	March6	NA	18.837	27.633
ENSMUSG00000040354	Mars	17.161	NA	14.517
ENSMUSG00000053693	Mast1	NA	NA	21.82
ENSMUSG00000042032	Mat2b	10.095	11.606	14.118
ENSMUSG00000037236	Matr3	12.955	16.091	19.236
ENSMUSG00000022139	Mbnl2	NA	NA	10.911
ENSMUSG00000041607	Mbp	21.006	16.844	27.212
ENSMUSG00000046873	Mbtps2	NA	NA	14.031
ENSMUSG00000038612	Mcl1	NA	NA	15.974
ENSMUSG00000048170	Mcmbp	NA	10.592	14.95
ENSMUSG00000009647	Mcu	11.719	10.785	12.869
ENSMUSG00000020321	Mdh1	19.164	26.235	30.965
ENSMUSG00000019179	Mdh2	11.862	16.955	NA
ENSMUSG00000028863	Meaf6	11.46	NA	11.378
ENSMUSG00000031935	Med17	NA	NA	11.959
ENSMUSG00000026799	Med27	11.929	NA	NA
ENSMUSG00000022109	Med4	16.118	NA	NA
ENSMUSG00000002679	Med6	NA	NA	11.531
ENSMUSG00000030557	Mef2a	NA	NA	11.108
ENSMUSG00000001419	Mef2d	NA	NA	45.686
ENSMUSG00000024593	Megf10	NA	NA	11.639
ENSMUSG00000036466	Megf11	NA	NA	14.505
ENSMUSG00000038503	Mesd	NA	NA	10.456
ENSMUSG00000036112	Metap2	NA	10.465	10.501
ENSMUSG00000068479	Mfap1a	11.631	11.444	NA
ENSMUSG00000048222	Mfap1b	11.631	11.444	NA
ENSMUSG00000026150	Mff	11.72	NA	10.206
ENSMUSG00000025220	Mgea5	NA	NA	11.962
ENSMUSG00000022517	Mgrn1	NA	12.707	NA
ENSMUSG00000056050	Mia3	NA	12.12	11.296
ENSMUSG00000020111	Micu1	NA	NA	14.29
ENSMUSG00000039478	Micu3	NA	13.706	10.206
ENSMUSG00000008035	Mid1ip1	10.218	NA	NA
ENSMUSG00000054942	Miga1	NA	NA	10.198
ENSMUSG00000024896	Minpp1	NA	NA	18.652
ENSMUSG00000025609	Mkln1	NA	13.491	12.973
ENSMUSG00000030120	Mlf2	NA	NA	13.522
ENSMUSG00000025979	Mob4	NA	15.062	11.686
ENSMUSG00000062270	Morf4l1	29.349	34.608	53.084
ENSMUSG00000031422	Morf4l2	11.063	NA	NA
ENSMUSG00000023861	Mpc1	14.775	14.837	30.386
ENSMUSG00000052373	Mpp3	12.001	11.566	16.777
ENSMUSG00000039640	Mrpl12	NA	10.262	10.328
ENSMUSG00000023939	Mrpl14	NA	NA	10.536
ENSMUSG00000033845	Mrpl15	NA	NA	11.412
ENSMUSG00000029066	Mrpl20	NA	NA	10.625
ENSMUSG00000024181	Mrpl28	NA	NA	12.555
ENSMUSG00000022889	Mrpl39	NA	NA	13.376
ENSMUSG00000062981	Mrpl42	11.068	NA	NA
ENSMUSG00000025208	Mrpl43	NA	NA	19.058
ENSMUSG00000026248	Mrpl44	NA	11.03	11.002
ENSMUSG00000037531	Mrpl47	11.721	NA	NA
ENSMUSG00000030706	Mrpl48	10.246	NA	NA
ENSMUSG00000044018	Mrpl50	16.859	12.089	10.639
ENSMUSG00000058267	Mrps14	12.826	14.274	NA
ENSMUSG00000028861	Mrps15	NA	NA	10.195
ENSMUSG00000023967	Mrps18a	NA	NA	11.27
ENSMUSG00000054312	Mrps21	NA	10.219	NA
ENSMUSG00000032459	Mrps22	10.162	NA	NA
ENSMUSG00000040269	Mrps28	10.13	NA	NA
ENSMUSG00000031533	Mrps31	NA	NA	17.131
ENSMUSG00000038880	Mrps34	NA	NA	10.88
ENSMUSG00000040112	Mrps35	NA	13.141	NA
ENSMUSG00000061474	Mrps36	10.922	NA	11.333
ENSMUSG00000069769	Msi2	NA	NA	13.976
ENSMUSG00000054733	Msra	NA	NA	18.038
ENSMUSG00000027282	Mtch2	NA	NA	31.373
ENSMUSG00000005667	Mthfd2	NA	NA	17.684
ENSMUSG00000039431	Mtmr7	NA	NA	12.889
ENSMUSG00000035078	Mtmr9	NA	NA	11.084
ENSMUSG00000016018	Mtrex	NA	11.653	NA
ENSMUSG00000038065	Mturn	NA	NA	14.332
ENSMUSG00000045636	Mtus1	NA	NA	10.725
ENSMUSG00000038740	Mvb12b	NA	10.479	NA
ENSMUSG00000025025	Mxi1	10.51	11.401	NA
ENSMUSG00000034593	Myo5a	NA	12.618	18.458
ENSMUSG00000021555	Naa35	NA	10.381	NA
ENSMUSG00000025402	Nab2	NA	NA	46.793
ENSMUSG00000061315	Naca	36.415	20.634	NA
ENSMUSG00000053916	Nanp	NA	NA	12.74
ENSMUSG00000058799	Nap1l1	NA	NA	19.44
ENSMUSG00000059119	Nap1l4	NA	10.246	NA
ENSMUSG00000006024	Napa	10.101	15.168	11.423
ENSMUSG00000027438	Napb	10.232	10.135	NA
ENSMUSG00000024581	Napg	14.132	21.304	NA
ENSMUSG00000024587	Nars	17.113	24.759	25.985
ENSMUSG00000028693	Nasp	NA	10.333	NA
ENSMUSG00000048142	Nat8l	11.906	NA	11.223
ENSMUSG00000031505	Naxd	NA	NA	17.471
ENSMUSG00000086316	Nbdy	NA	NA	18.132
ENSMUSG00000017119	Nbr1	10.063	12.075	22.953
ENSMUSG00000051359	Ncald	11.67	NA	38.999
ENSMUSG00000039542	Ncam1	NA	13.435	19.77
ENSMUSG00000028833	Ncdn	26.701	24.594	31.688
ENSMUSG00000032475	Nck1	NA	NA	10.099
ENSMUSG00000027002	Nckap1	10.865	13.758	22.41
ENSMUSG00000032598	Nckipsd	NA	11.265	NA
ENSMUSG00000056234	Ncoa4	NA	NA	10.29
ENSMUSG00000003458	Ncstn	NA	NA	14.717
ENSMUSG00000024425	Ndfip1	20.341	30.905	16.698
ENSMUSG00000053253	Ndfip2	NA	17.584	13.96
ENSMUSG00000033585	Ndn	11.671	14.859	15.424
ENSMUSG00000027634	Ndrg3	16.673	29.358	57.474
ENSMUSG00000016427	Ndufa1	NA	13.233	21.358
ENSMUSG00000002379	Ndufa11	NA	NA	17.201
ENSMUSG00000035674	Ndufa3	11.134	19.324	21.573
ENSMUSG00000029632	Ndufa4	NA	13.623	31.166
ENSMUSG00000023089	Ndufa5	14.179	16.264	13.211
ENSMUSG00000040048	Ndufb10	NA	11.807	16.897
ENSMUSG00000031059	Ndufb11	NA	NA	22.431
ENSMUSG00000022820	Ndufb4	NA	NA	13.499
ENSMUSG00000071014	Ndufb6	NA	NA	10.456
ENSMUSG00000025204	Ndufb8	NA	18.908	NA
ENSMUSG00000022354	Ndufb9	11.065	NA	12.365
ENSMUSG00000025968	Ndufs1	NA	NA	12.68
ENSMUSG00000013593	Ndufs2	12.134	18.249	15.553
ENSMUSG00000021764	Ndufs4	12.796	13.066	NA
ENSMUSG00000020153	Ndufs7	19.798	12.622	16.197
ENSMUSG00000024099	Ndufv2	12.988	NA	11.957
ENSMUSG00000040536	Necab1	NA	11.032	NA
ENSMUSG00000032216	Nedd4	10.445	11.381	25.555
ENSMUSG00000024589	Nedd4l	NA	11.99	NA
ENSMUSG00000022055	Nefl	NA	12.488	NA
ENSMUSG00000040037	Negr1	NA	NA	10.335
ENSMUSG00000032340	Neo1	NA	NA	11.425
ENSMUSG00000036902	Neto2	NA	15.439	10.759
ENSMUSG00000026442	Nfasc	NA	11.19	11.712
ENSMUSG00000008575	Nfib	NA	14.004	15.137
ENSMUSG00000001911	Nfix	NA	23.976	25.75
ENSMUSG00000029993	Nfu1	NA	NA	11.268
ENSMUSG00000032897	Nfyc	NA	15.356	15.504
ENSMUSG00000021785	Ngly1	NA	12.094	NA
ENSMUSG00000021910	Nisch	NA	NA	18.98
ENSMUSG00000021772	Nkiras1	NA	NA	12.591
ENSMUSG00000027787	Nmd3	NA	18.744	NA
ENSMUSG00000026643	Nmt2	NA	14.104	NA
ENSMUSG00000023087	Noct	NA	NA	16.181
ENSMUSG00000063200	Nol7	11.175	16.951	NA
ENSMUSG00000041560	Nop53	NA	NA	10.286
ENSMUSG00000027405	Nop56	NA	14.754	NA
ENSMUSG00000015094	Npdc1	NA	NA	31.33
ENSMUSG00000001441	Npepps	NA	NA	10.639
ENSMUSG00000039703	Nploc4	NA	17.612	NA
ENSMUSG00000057113	Npm1	17.383	NA	NA
ENSMUSG00000032336	Nptn	13.889	22.882	10.632
ENSMUSG00000021775	Nr1d2	NA	NA	13.65
ENSMUSG00000026826	Nr4a2	NA	10.13	NA
ENSMUSG00000029148	Nrbp1	NA	NA	15.3
ENSMUSG00000020598	Nrcam	NA	NA	12.879
ENSMUSG00000042834	Nrep	18.46	17.784	32.648
ENSMUSG00000034825	Nrip3	NA	NA	20.004
ENSMUSG00000024109	Nrxn1	17.089	25.179	54.754
ENSMUSG00000033768	Nrxn2	11.19	23.2	25.864
ENSMUSG00000066392	Nrxn3	12.73	12.714	10.82
ENSMUSG00000034187	Nsf	15.953	16.147	10.959
ENSMUSG00000027455	Nsfl1c	NA	NA	11.462
ENSMUSG00000029126	Nsg1	19.928	NA	NA
ENSMUSG00000020297	Nsg2	11.521	11.495	12.712
ENSMUSG00000040331	Nsmce4a	10.132	NA	19.219
ENSMUSG00000025041	Nt5c2	NA	10.051	NA
ENSMUSG00000059974	Ntm	NA	NA	19.83
ENSMUSG00000059146	Ntrk3	NA	NA	11.179
ENSMUSG00000028954	Nub1	NA	10.657	15.076
ENSMUSG00000026434	Nucks1	NA	13.731	20.854
ENSMUSG00000020328	Nudcd2	11.492	NA	NA
ENSMUSG00000024213	Nudt3	10.718	13.18	NA
ENSMUSG00000066306	Numa1	10.14	NA	NA
ENSMUSG00000063895	Nupl1	NA	11.609	NA
ENSMUSG00000020844	Nxn	NA	NA	11.389
ENSMUSG00000040771	Oard1	NA	NA	11.129
ENSMUSG00000035242	Oaz1	14.642	NA	18.062
ENSMUSG00000029152	Ociad1	13.223	11.421	13.574
ENSMUSG00000021638	Ocln	NA	NA	10.191
ENSMUSG00000020456	Ogdh	NA	NA	12.988
ENSMUSG00000034160	Ogt	NA	10.4	NA
ENSMUSG00000027108	Ola1	NA	NA	16.295
ENSMUSG00000026833	Olfm1	11.292	10.519	28.033
ENSMUSG00000027965	Olfm3	10.633	18.667	13.988
ENSMUSG00000038084	Opa1	NA	NA	11.934
ENSMUSG00000062257	Opcml	11.154	11.532	16.071
ENSMUSG00000026672	Optn	NA	13.591	NA
ENSMUSG00000040044	Orc3	NA	10.161	NA
ENSMUSG00000039050	Osbpl2	NA	14.628	NA
ENSMUSG00000035399	Oser1	NA	NA	12.343
ENSMUSG00000022186	Oxct1	11.002	14.328	NA
ENSMUSG00000022307	Oxr1	10.221	12.922	10.198
ENSMUSG00000025130	P4hb	NA	NA	16.873
ENSMUSG00000025364	Pa2g4	NA	NA	12.308
ENSMUSG00000022194	Pabpn1	NA	12.643	NA
ENSMUSG00000020745	Pafah1b1	NA	14.81	41.879
ENSMUSG00000029247	Paics	NA	12.405	NA
ENSMUSG00000025451	Paip1	10.133	10.387	11.234
ENSMUSG00000030774	Pak1	10.883	11.009	14.767
ENSMUSG00000026335	Pam	NA	11.169	NA
ENSMUSG00000055725	Paqr3	13.485	16.509	31.304
ENSMUSG00000025931	Paqr8	NA	10.293	NA
ENSMUSG00000051695	Pcbp1	16.48	18.443	29.873
ENSMUSG00000029108	Pcdh7	NA	14.233	NA
ENSMUSG00000102697	Pcdhac2	NA	20.917	NA
ENSMUSG00000103472	Pcdhga7	NA	10.519	NA
ENSMUSG00000102918	Pcdhgc3	NA	NA	10.698
ENSMUSG00000031592	Pcm1	11.387	15.091	NA
ENSMUSG00000090223	Pcp4	25.3	28.275	19.499
ENSMUSG00000039278	Pcsk1n	10.39	NA	11.614
ENSMUSG00000029998	Pcyox1	NA	NA	18.468
ENSMUSG00000024579	Pcyox1l	NA	13.968	NA
ENSMUSG00000025137	Pcyt2	NA	NA	10.077
ENSMUSG00000027835	Pdcd10	NA	NA	11.873
ENSMUSG00000028525	Pde4b	NA	11.755	13.05
ENSMUSG00000038170	Pde4dip	14.454	11.502	17.655
ENSMUSG00000021748	Pdhb	NA	NA	13.902
ENSMUSG00000027248	Pdia3	NA	NA	10.435
ENSMUSG00000025823	Pdia4	NA	15.871	11.456
ENSMUSG00000020571	Pdia6	NA	NA	10.921
ENSMUSG00000034021	Pds5b	NA	13.216	NA
ENSMUSG00000028102	Pex11b	NA	NA	10.311
ENSMUSG00000028975	Pex14	NA	11.911	10.365
ENSMUSG00000024346	Pfdn1	NA	NA	23.631
ENSMUSG00000052033	Pfdn4	11.02	19.425	18.392
ENSMUSG00000027805	Pfn2	13.113	16.306	16.787
ENSMUSG00000011752	Pgam1	12.316	14.138	20.436
ENSMUSG00000029500	Pgam5	NA	NA	14.92
ENSMUSG00000050751	Pgbd5	NA	10.338	NA
ENSMUSG00000025791	Pgm1	NA	11.724	NA
ENSMUSG00000008301	Phax	NA	11.086	NA
ENSMUSG00000023883	Phf10	NA	14.787	22.454
ENSMUSG00000053398	Phgdh	NA	10.22	16.288
ENSMUSG00000026664	Phyh	NA	NA	20.955
ENSMUSG00000003469	Phyhip	NA	14.342	13.66
ENSMUSG00000041720	Pi4ka	NA	13.533	NA
ENSMUSG00000039361	Picalm	NA	16.44	15.589
ENSMUSG00000039047	Pigk	NA	11.905	10.308
ENSMUSG00000033628	Pik3c3	NA	10.513	NA
ENSMUSG00000031834	Pik3r2	NA	NA	11.902
ENSMUSG00000079480	Pin4	NA	NA	12.107
ENSMUSG00000028756	Pink1	NA	10.855	NA
ENSMUSG00000017781	Pitpna	NA	10.033	NA
ENSMUSG00000034403	Pja1	NA	NA	21.212
ENSMUSG00000024083	Pja2	NA	12.817	12.736
ENSMUSG00000039943	Plcb4	NA	NA	13.359
ENSMUSG00000026123	Plekhb2	NA	NA	12.222
ENSMUSG00000031425	Plp1	NA	NA	12.45
ENSMUSG00000044667	Plppr4	NA	11.796	NA
ENSMUSG00000036606	Plxnb2	NA	10.481	NA
ENSMUSG00000026926	Pmpca	NA	NA	12.432
ENSMUSG00000029017	Pmpcb	NA	NA	16.313
ENSMUSG00000026179	Pnkd	12.371	16.731	NA
ENSMUSG00000070802	Pnmal2	NA	NA	17.284
ENSMUSG00000020116	Pno1	NA	NA	13.181
ENSMUSG00000036257	Pnpla8	NA	12.126	NA
ENSMUSG00000040128	Pnrc1	14.84	11.86	13.311
ENSMUSG00000041815	Poldip3	NA	10.115	NA
ENSMUSG00000029642	Polr1d	15.764	NA	NA
ENSMUSG00000029250	Polr2b	11.816	10.122	10.697
ENSMUSG00000024258	Polr2d	11.247	NA	NA
ENSMUSG00000031169	Porcn	NA	NA	13.312
ENSMUSG00000021096	Ppm1a	NA	11.603	NA
ENSMUSG00000020525	Ppm1d	NA	15.903	10.036
ENSMUSG00000034613	Ppm1h	NA	NA	11.211
ENSMUSG00000040385	Ppp1ca	11.731	13.662	16.818
ENSMUSG00000014956	Ppp1cb	10.934	14.268	15.204
ENSMUSG00000004455	Ppp1cc	12.068	11.731	15.439
ENSMUSG00000019907	Ppp1r12a	10.147	10.279	NA
ENSMUSG00000046062	Ppp1r15b	NA	NA	15.022
ENSMUSG00000022490	Ppp1r1a	NA	NA	15.659
ENSMUSG00000028882	Ppp1r8	NA	10.644	18.246
ENSMUSG00000020349	Ppp2ca	17.342	21.88	24.444
ENSMUSG00000009630	Ppp2cb	NA	NA	17.456
ENSMUSG00000007564	Ppp2r1a	10.153	14.802	25.956
ENSMUSG00000022052	Ppp2r2a	NA	NA	10.153
ENSMUSG00000041769	Ppp2r2d	NA	11.557	NA
ENSMUSG00000059409	Ppp2r5d	NA	NA	17.481
ENSMUSG00000028161	Ppp3ca	13.25	16.357	36.023
ENSMUSG00000021816	Ppp3cb	15.655	13.192	18.167
ENSMUSG00000033953	Ppp3r1	11.436	NA	15.871
ENSMUSG00000003099	Ppp5c	NA	NA	10.818
ENSMUSG00000026753	Ppp6c	NA	NA	20.692
ENSMUSG00000015474	Ppt2	NA	10.509	10.506
ENSMUSG00000031157	Pqbp1	NA	13.447	13.892
ENSMUSG00000004895	Prcc	NA	27.621	10.818
ENSMUSG00000035456	Prdm8	NA	15.975	NA
ENSMUSG00000005161	Prdx2	15.088	NA	NA
ENSMUSG00000025289	Prdx4	NA	NA	10.193
ENSMUSG00000024953	Prdx5	14.428	NA	NA
ENSMUSG00000026701	Prdx6	NA	10.685	NA
ENSMUSG00000024127	Prepl	10.657	16.298	32.392
ENSMUSG00000005034	Prkacb	11.549	27.742	25.232
ENSMUSG00000020612	Prkar1a	12.448	21.814	28.111
ENSMUSG00000025855	Prkar1b	10.649	23.942	10.283
ENSMUSG00000052889	Prkcb	NA	10.172	12.894
ENSMUSG00000045038	Prkce	NA	NA	17.453
ENSMUSG00000079037	Prnp	NA	NA	11.152
ENSMUSG00000027881	Prpf38b	NA	10.917	NA
ENSMUSG00000020850	Prpf8	11.568	NA	21.189
ENSMUSG00000079104	Prps1l3	NA	NA	12.408
ENSMUSG00000045114	Prrt2	12.075	11.599	NA
ENSMUSG00000039126	Prune2	NA	15.72	11.504
ENSMUSG00000004207	Psap	10.772	16.754	19.468
ENSMUSG00000024640	Psat1	16.845	14.27	NA
ENSMUSG00000036835	Psenen	NA	NA	11.693
ENSMUSG00000028484	Psip1	NA	10.411	NA
ENSMUSG00000030751	Psma1	NA	10.299	17.687
ENSMUSG00000015671	Psma2	NA	12.838	21.025
ENSMUSG00000060073	Psma3	11.698	NA	31.479
ENSMUSG00000068749	Psma5	10.199	13.963	NA
ENSMUSG00000021024	Psma6	10.217	NA	37.341
ENSMUSG00000027566	Psma7	NA	NA	30.685
ENSMUSG00000014769	Psmb1	11.324	12.777	21.34
ENSMUSG00000005779	Psmb4	NA	16.289	15.47
ENSMUSG00000022193	Psmb5	NA	13.09	11.297
ENSMUSG00000018286	Psmb6	NA	NA	10.736
ENSMUSG00000026750	Psmb7	NA	13.515	17.138
ENSMUSG00000021178	Psmc1	13.127	11.832	10.37
ENSMUSG00000020708	Psmc5	13.339	12.606	23.347
ENSMUSG00000021832	Psmc6	11.185	10.805	16.098
ENSMUSG00000026229	Psmd1	NA	10.555	11.899
ENSMUSG00000017428	Psmd11	NA	NA	35.223
ENSMUSG00000020720	Psmd12	11.074	18.721	23.314
ENSMUSG00000025487	Psmd13	NA	12.515	NA
ENSMUSG00000026914	Psmd14	10.004	NA	11.895
ENSMUSG00000006998	Psmd2	NA	NA	15.147
ENSMUSG00000017221	Psmd3	NA	10.379	NA
ENSMUSG00000026869	Psmd5	NA	NA	18.518
ENSMUSG00000021737	Psmd6	11.397	12.205	NA
ENSMUSG00000078652	Psme3	NA	NA	15.956
ENSMUSG00000021938	Pspc1	NA	11.504	NA
ENSMUSG00000028134	Ptbp2	NA	NA	11.502
ENSMUSG00000021518	Ptdss1	NA	NA	13.058
ENSMUSG00000026238	Ptma	12.086	12.724	19.16
ENSMUSG00000030122	Ptms	16.273	14.753	17.166
ENSMUSG00000029838	Ptn	10.569	NA	NA
ENSMUSG00000038502	Ptov1	NA	13.461	10.381
ENSMUSG00000026064	Ptp4a1	NA	10.801	11.996
ENSMUSG00000039515	Ptpa	NA	NA	14.383
ENSMUSG00000043733	Ptpn11	NA	NA	11.303
ENSMUSG00000026204	Ptprn	15.575	11.164	28.507
ENSMUSG00000056553	Ptprn2	NA	NA	14.086
ENSMUSG00000002524	Puf60	12.81	10.417	14.861
ENSMUSG00000028580	Pum1	NA	12.269	10.062
ENSMUSG00000005716	Pvalb	14.831	41.053	55.616
ENSMUSG00000064030	Pym1	NA	NA	12.413
ENSMUSG00000043162	Pyurf	NA	10.797	NA
ENSMUSG00000062078	Qk	NA	NA	11.48
ENSMUSG00000006673	Qrich1	NA	NA	36.049
ENSMUSG00000035781	R3hdm4	NA	10.395	NA
ENSMUSG00000020671	Rab10	NA	11.45	16.352
ENSMUSG00000004771	Rab11a	NA	10.152	17.086
ENSMUSG00000077450	Rab11b	NA	10.263	16.073
ENSMUSG00000023460	Rab12	NA	NA	12.46
ENSMUSG00000073639	Rab18	11.065	10.495	NA
ENSMUSG00000020149	Rab1a	14.347	12.409	17.732
ENSMUSG00000020132	Rab21	NA	NA	14.542
ENSMUSG00000027519	Rab22a	NA	NA	10.224
ENSMUSG00000047187	Rab2a	NA	NA	13.783
ENSMUSG00000031202	Rab39b	NA	NA	18.434
ENSMUSG00000021700	Rab3c	10.235	10.189	14.911
ENSMUSG00000019478	Rab4a	NA	NA	14.11
ENSMUSG00000017831	Rab5a	NA	NA	10.165
ENSMUSG00000030704	Rab6a	18.109	19.168	12.621
ENSMUSG00000079477	Rab7	NA	NA	27.641
ENSMUSG00000036943	Rab8b	NA	10.785	NA
ENSMUSG00000035437	Rabgap1	NA	10.549	21.758
ENSMUSG00000020372	Rack1	NA	14.061	15.504
ENSMUSG00000022314	Rad21	14.353	NA	NA
ENSMUSG00000038646	Ramac	NA	NA	12.394
ENSMUSG00000029430	Ran	NA	14.712	NA
ENSMUSG00000038546	Ranbp9	NA	NA	11.879
ENSMUSG00000032892	Rangrf	NA	NA	15.822
ENSMUSG00000041351	Rap1gap	NA	10.363	NA
ENSMUSG00000028149	Rap1gds1	13.401	11.516	25.987
ENSMUSG00000018848	Rars	NA	12.74	25.577
ENSMUSG00000031453	Rasa3	NA	NA	11.002
ENSMUSG00000032356	Rasgrf1	NA	10.251	10.766
ENSMUSG00000026439	Rbbp5	NA	NA	26.618
ENSMUSG00000033565	Rbfox2	NA	NA	11.539
ENSMUSG00000025576	Rbfox3	15.519	18.823	21.98
ENSMUSG00000037197	Rbm17	NA	NA	10.937
ENSMUSG00000026889	Rbm18	NA	NA	10.08
ENSMUSG00000031167	Rbm3	18.954	NA	22.596
ENSMUSG00000027620	Rbm39	NA	14.946	17.299
ENSMUSG00000036733	Rbm42	NA	13.465	16.013
ENSMUSG00000042396	Rbm7	NA	10.603	13.983
ENSMUSG00000078184	Rbm8a2	NA	10.666	NA
ENSMUSG00000037070	Rbmxl1	NA	NA	10.44
ENSMUSG00000022400	Rbx1	NA	NA	14.594
ENSMUSG00000040945	Rcc2	NA	14.871	22.466
ENSMUSG00000025350	Rdh5	10.158	21.739	NA
ENSMUSG00000032050	Rdx	11.69	18.667	NA
ENSMUSG00000052852	Reep1	NA	11.459	NA
ENSMUSG00000035504	Reep6	10.26	10.035	10.677
ENSMUSG00000042453	Reln	15.613	19.167	12.155
ENSMUSG00000052751	Repin1	NA	10.508	NA
ENSMUSG00000039852	Rere	NA	NA	13.815
ENSMUSG00000049339	Retreg2	NA	10.814	21.56
ENSMUSG00000024712	Rfk	NA	11.086	11.047
ENSMUSG00000019775	Rgs17	NA	10.916	NA
ENSMUSG00000026527	Rgs7	NA	NA	13.88
ENSMUSG00000007815	Rhoa	NA	NA	12.495
ENSMUSG00000017686	Rhot1	NA	12.736	19.789
ENSMUSG00000057455	Rit2	NA	NA	10.2
ENSMUSG00000017144	Rnd3	NA	14.97	NA
ENSMUSG00000052656	Rnf103	NA	NA	19.747
ENSMUSG00000028557	Rnf11	NA	11.538	23.068
ENSMUSG00000010086	Rnf112	11.567	10.91	10.388
ENSMUSG00000028098	Rnf115	11.641	NA	10.67
ENSMUSG00000031438	Rnf128	NA	11.251	NA
ENSMUSG00000020376	Rnf130	NA	11.599	11.762
ENSMUSG00000037075	Rnf139	NA	18.988	53.217
ENSMUSG00000060450	Rnf14	NA	11.581	21.324
ENSMUSG00000019189	Rnf145	NA	NA	10.478
ENSMUSG00000038876	Rnf146	NA	19.243	27.976
ENSMUSG00000055850	Rnf181	NA	15.153	NA
ENSMUSG00000026484	Rnf2	10.091	19.577	16.772
ENSMUSG00000029474	Rnf34	10.359	NA	NA
ENSMUSG00000038650	Rnh1	NA	NA	11.085
ENSMUSG00000009535	Rnmt	NA	11.966	13.149
ENSMUSG00000032238	Rora	NA	NA	18.779
ENSMUSG00000038510	Rpf2	NA	15.299	NA
ENSMUSG00000029608	Rph3a	NA	NA	28.043
ENSMUSG00000038900	Rpl12	10.002	NA	NA
ENSMUSG00000000740	Rpl13	NA	NA	10.826
ENSMUSG00000025794	Rpl14	10.297	NA	10.296
ENSMUSG00000012405	Rpl15	24.74	NA	NA
ENSMUSG00000071415	Rpl23	19.905	17.719	23.38
ENSMUSG00000098274	Rpl24	17.904	26.558	54.719
ENSMUSG00000060938	Rpl26	11.6	12.557	25.09
ENSMUSG00000046364	Rpl27a	12.862	20.058	21.821
ENSMUSG00000030432	Rpl28	NA	16.414	15.277
ENSMUSG00000058600	Rpl30	14.444	16.138	17.41
ENSMUSG00000057841	Rpl32	16.877	16.657	16.645
ENSMUSG00000062006	Rpl34	11.908	17.931	NA
ENSMUSG00000062997	Rpl35	NA	NA	19.568
ENSMUSG00000057863	Rpl36	19.317	22.142	23.331
ENSMUSG00000049751	Rpl36al	NA	NA	21.84
ENSMUSG00000041841	Rpl37	10.69	11.252	14.829
ENSMUSG00000046330	Rpl37a	NA	19.242	NA
ENSMUSG00000032399	Rpl4	17.337	14.525	36.951
ENSMUSG00000093674	Rpl41	36.73	22.248	36.218
ENSMUSG00000058558	Rpl5	NA	NA	17.249
ENSMUSG00000029614	Rpl6	10.876	13.047	16.613
ENSMUSG00000043716	Rpl7	12.806	NA	13.373
ENSMUSG00000062647	Rpl7a	23.052	31.698	38.121
ENSMUSG00000063888	Rpl7l1	10.131	12.834	19.654
ENSMUSG00000003970	Rpl8	NA	NA	38.023
ENSMUSG00000030062	Rpn1	NA	NA	14.98
ENSMUSG00000052146	Rps10	19.589	23.675	23.826
ENSMUSG00000003429	Rps11	NA	NA	15.222
ENSMUSG00000090862	Rps13	17.176	11.377	20.838
ENSMUSG00000024608	Rps14	10.27	13.701	18.351
ENSMUSG00000063457	Rps15	19.501	16.681	NA
ENSMUSG00000040952	Rps19	13.91	11.266	13.357
ENSMUSG00000028234	Rps20	12.44	NA	NA
ENSMUSG00000049517	Rps23	NA	13.816	NA
ENSMUSG00000025290	Rps24	23.73	18.424	22.61
ENSMUSG00000009927	Rps25	14.757	11.149	22.775
ENSMUSG00000025362	Rps26	14.961	NA	NA
ENSMUSG00000036781	Rps27l	NA	11.213	NA
ENSMUSG00000030744	Rps3	NA	NA	21.243
ENSMUSG00000028081	Rps3a1	23.929	23.696	31.575
ENSMUSG00000031320	Rps4x	10.9	11.028	15.459
ENSMUSG00000012848	Rps5	NA	NA	16.398
ENSMUSG00000028495	Rps6	21.531	26.892	22.662
ENSMUSG00000003644	Rps6ka1	NA	27.541	11.444
ENSMUSG00000061477	Rps7	NA	10.786	12.124
ENSMUSG00000006333	Rps9	NA	12.764	15.019
ENSMUSG00000022682	Rrn3	NA	11.09	NA
ENSMUSG00000061032	Rrp1	15.989	13.049	NA
ENSMUSG00000032215	Rsl24d1	NA	NA	16.436
ENSMUSG00000037266	Rsrp1	NA	10.641	NA
ENSMUSG00000001783	Rtcb	NA	NA	23.107
ENSMUSG00000024758	Rtn3	41.178	53.078	53.871
ENSMUSG00000021807	Rtraf	11.16	NA	10.661
ENSMUSG00000029291	Rufy3	15.16	23.932	30.651
ENSMUSG00000006575	Rundc3a	10.414	NA	17.128
ENSMUSG00000041263	Rusc1	NA	14.52	11.193
ENSMUSG00000025240	Sacm1l	NA	11.995	16.266
ENSMUSG00000052833	Sae1	NA	12.097	NA
ENSMUSG00000071054	Safb	NA	NA	14.596
ENSMUSG00000021963	Sap18	NA	13.064	NA
ENSMUSG00000061104	Sap18b	NA	13.01	NA
ENSMUSG00000031532	Saraf	12.386	NA	21.023
ENSMUSG00000068739	Sars	NA	NA	41.925
ENSMUSG00000025337	Sbds	NA	NA	12.408
ENSMUSG00000032018	Sc5d	NA	NA	14.101
ENSMUSG00000021687	Scamp1	NA	NA	33.893
ENSMUSG00000025203	Scd2	NA	11.255	14.262
ENSMUSG00000050711	Scg2	13.819	12.019	27.74
ENSMUSG00000027777	Schip1	26.072	28.755	61.977
ENSMUSG00000064329	Scn1a	NA	13.084	NA
ENSMUSG00000019194	Scn1b	NA	NA	26.022
ENSMUSG00000075318	Scn2a	17.399	39.198	37.771
ENSMUSG00000023033	Scn8a	NA	13.335	NA
ENSMUSG00000091780	Sco2	NA	NA	11.986
ENSMUSG00000063253	Scoc	12.854	12.82	NA
ENSMUSG00000000278	Scpep1	NA	NA	10.959
ENSMUSG00000019124	Scrn1	NA	13.912	17.867
ENSMUSG00000029076	Sdf4	NA	NA	10.604
ENSMUSG00000021577	Sdha	NA	NA	16.379
ENSMUSG00000042505	Sdhaf3	NA	17.555	NA
ENSMUSG00000009863	Sdhb	NA	12.674	12.076
ENSMUSG00000000171	Sdhd	NA	NA	14.114
ENSMUSG00000025724	Sec11a	NA	NA	11.047
ENSMUSG00000030298	Sec13	NA	NA	15.509
ENSMUSG00000020823	Sec14l1	NA	NA	35.516
ENSMUSG00000027879	Sec22b	NA	NA	12.836
ENSMUSG00000027429	Sec23b	NA	NA	10.607
ENSMUSG00000001052	Sec24b	NA	10.042	NA
ENSMUSG00000053317	Sec61b	NA	13.392	NA
ENSMUSG00000078974	Sec61g	NA	11.693	NA
ENSMUSG00000035093	Secisbp2l	NA	12.571	NA
ENSMUSG00000079614	Seh1l	NA	15.749	11.133
ENSMUSG00000037072	Selenof	10.37	NA	NA
ENSMUSG00000064373	Selenop	14.56	NA	NA
ENSMUSG00000075701	Selenos	11.206	NA	NA
ENSMUSG00000038264	Sema7a	NA	NA	13.039
ENSMUSG00000001833	Sept7	NA	10.138	14.379
ENSMUSG00000036371	Serbp1	12.627	10.328	12.55
ENSMUSG00000021643	Serf1	NA	NA	12.119
ENSMUSG00000074884	Serf2	15.416	NA	NA
ENSMUSG00000019877	Serinc1	21.58	35.773	35.259
ENSMUSG00000017707	Serinc3	12.926	NA	NA
ENSMUSG00000027834	Serpini1	NA	11.057	NA
ENSMUSG00000038332	Sesn1	NA	NA	19.079
ENSMUSG00000028893	Sesn2	NA	NA	25.634
ENSMUSG00000054766	Set	NA	10.817	NA
ENSMUSG00000000632	Sez6	NA	16.589	14.192
ENSMUSG00000058153	Sez6l	NA	14.221	20.594
ENSMUSG00000030683	Sez6l2	10.05	20.563	14.194
ENSMUSG00000024949	Sf1	10.263	11.232	26.074
ENSMUSG00000002129	Sf3a1	NA	NA	21.386
ENSMUSG00000020211	Sf3a2	NA	13.665	NA
ENSMUSG00000025982	Sf3b1	11.885	NA	21.171
ENSMUSG00000033732	Sf3b3	NA	19.068	14.513
ENSMUSG00000068856	Sf3b4	NA	15.859	15.772
ENSMUSG00000037361	Sf3b6	NA	15.096	35.602
ENSMUSG00000028820	Sfpq	NA	11.348	NA
ENSMUSG00000021474	Sfxn1	NA	NA	19.394
ENSMUSG00000063698	Sfxn4	NA	11.309	NA
ENSMUSG00000028524	Sgip1	NA	NA	11.003
ENSMUSG00000004937	Sgta	NA	NA	10.046
ENSMUSG00000028488	Sh3gl2	14.704	14.708	22.794
ENSMUSG00000096883	Shisa8	NA	11.648	NA
ENSMUSG00000025403	Shmt2	NA	14.696	19.171
ENSMUSG00000024976	Shoc2	NA	11.367	NA
ENSMUSG00000036432	Siah2	NA	NA	11.785
ENSMUSG00000034135	Sik3	NA	12.978	10.819
ENSMUSG00000031622	Sin3b	NA	NA	11.887
ENSMUSG00000037902	Sirpa	10.676	13.271	13.28
ENSMUSG00000029050	Ski	NA	NA	10.117
ENSMUSG00000024597	Slc12a2	NA	NA	24.762
ENSMUSG00000017740	Slc12a5	10.32	NA	10.243
ENSMUSG00000030500	Slc17a6	NA	13.908	NA
ENSMUSG00000005089	Slc1a2	NA	10.151	NA
ENSMUSG00000020142	Slc1a4	NA	19.466	31.897
ENSMUSG00000005357	Slc1a6	NA	NA	11.23
ENSMUSG00000027340	Slc23a2	NA	NA	12.475
ENSMUSG00000037996	Slc24a2	11.757	10.77	NA
ENSMUSG00000027010	Slc25a12	NA	10.254	41.825
ENSMUSG00000022404	Slc25a17	NA	NA	10.005
ENSMUSG00000019082	Slc25a22	22.063	12.596	15.127
ENSMUSG00000061904	Slc25a3	24.494	40.649	18.405
ENSMUSG00000032449	Slc25a36	NA	NA	10.607
ENSMUSG00000031633	Slc25a4	NA	NA	22.248
ENSMUSG00000016319	Slc25a5	NA	NA	18.978
ENSMUSG00000003153	Slc2a3	NA	15.752	20.844
ENSMUSG00000028293	Slc35a1	NA	NA	12.108
ENSMUSG00000022664	Slc35a5	NA	11.129	10.862
ENSMUSG00000020873	Slc35b1	NA	NA	10.538
ENSMUSG00000037089	Slc35b2	NA	NA	16.892
ENSMUSG00000024270	Slc39a6	10.368	NA	NA
ENSMUSG00000010095	Slc3a2	NA	13.492	21.17
ENSMUSG00000026904	Slc4a10	NA	NA	19.204
ENSMUSG00000041313	Slc7a1	NA	NA	12.686
ENSMUSG00000027737	Slc7a11	NA	NA	12.269
ENSMUSG00000031297	Slc7a3	NA	14.149	21.331
ENSMUSG00000040010	Slc7a5	16.242	13.241	36.426
ENSMUSG00000022180	Slc7a8	NA	NA	14.976
ENSMUSG00000054640	Slc8a1	NA	16.522	18.149
ENSMUSG00000030376	Slc8a2	17.306	NA	19.905
ENSMUSG00000002504	Slc9a3r2	NA	NA	11.689
ENSMUSG00000060681	Slc9a6	10.453	NA	10.929
ENSMUSG00000037341	Slc9a7	11.549	NA	NA
ENSMUSG00000036790	Slitrk2	NA	18.658	NA
ENSMUSG00000046699	Slitrk4	NA	14.349	NA
ENSMUSG00000032870	Smap2	NA	NA	21.487
ENSMUSG00000024921	Smarca2	12.609	17.094	32.408
ENSMUSG00000031715	Smarca5	NA	11.025	NA
ENSMUSG00000039354	Smarcal1	NA	11.754	NA
ENSMUSG00000023018	Smarcd1	NA	NA	14.2
ENSMUSG00000028949	Smarcd3	NA	13.994	NA
ENSMUSG00000037935	Smarce1	11.456	11.836	14.009
ENSMUSG00000024974	Smc3	11.825	NA	NA
ENSMUSG00000042380	Smim12	10.415	14.525	NA
ENSMUSG00000031534	Smim19	NA	NA	10.408
ENSMUSG00000071708	Sms	NA	NA	10.177
ENSMUSG00000028409	Smu1	NA	16.696	13.651
ENSMUSG00000027273	Snap25	14.718	NA	56.83
ENSMUSG00000009894	Snap47	11.06	13.791	12.252
ENSMUSG00000033419	Snap91	10.587	11.91	15.898
ENSMUSG00000021113	Snapc1	NA	11.118	NA
ENSMUSG00000001424	Snd1	NA	NA	12.916
ENSMUSG00000038145	Snrk	NA	11.168	15.22
ENSMUSG00000038145	Snrk	NA	11.255	14.6
ENSMUSG00000038145	Snrk	NA	11.312	14.505
ENSMUSG00000003660	Snrnp200	NA	NA	21.426
ENSMUSG00000074088	Snrnp40	NA	NA	12.726
ENSMUSG00000027404	Snrpb	16.635	NA	11.695
ENSMUSG00000024217	Snrpc	16.608	NA	13.23
ENSMUSG00000002477	Snrpd1	10.079	NA	12.795
ENSMUSG00000020180	Snrpd3	NA	NA	21.453
ENSMUSG00000090553	Snrpe	NA	11.85	NA
ENSMUSG00000057278	Snrpg	NA	13.742	15.63
ENSMUSG00000102252	Snrpn	10.64	12.54	15.96
ENSMUSG00000063480	Snu13	NA	10.625	11.762
ENSMUSG00000102627	Snurf	12.075	14.762	21.816
ENSMUSG00000021039	Snw1	NA	NA	10.637
ENSMUSG00000019804	Snx3	13.81	12.867	24.757
ENSMUSG00000022961	Son	NA	10.724	20.459
ENSMUSG00000049313	Sorl1	NA	NA	17.432
ENSMUSG00000021917	Spcs1	10.686	NA	NA
ENSMUSG00000035227	Spcs2	NA	NA	10.457
ENSMUSG00000026163	Sphkap	14.384	15.75	29.054
ENSMUSG00000074227	Spint2	NA	12.256	11.272
ENSMUSG00000030741	Spns1	NA	13.771	NA
ENSMUSG00000056222	Spock1	10.886	11.021	26.834
ENSMUSG00000058297	Spock2	NA	15.8	19.311
ENSMUSG00000027351	Spred1	NA	NA	11
ENSMUSG00000045733	Sprn	NA	11.96	NA
ENSMUSG00000022114	Spry2	NA	18.875	NA
ENSMUSG00000036966	Spryd3	NA	NA	17.965
ENSMUSG00000024160	Spsb3	NA	13.59	NA
ENSMUSG00000057738	Sptan1	10.854	14.285	45.966
ENSMUSG00000020315	Sptbn1	NA	NA	25.131
ENSMUSG00000038453	Srcin1	11.916	NA	NA
ENSMUSG00000022463	Srebf2	NA	NA	17.478
ENSMUSG00000026425	Srgap2	10.024	NA	NA
ENSMUSG00000003161	Sri	NA	NA	13.785
ENSMUSG00000073079	Srp54a	NA	20.732	28.613
ENSMUSG00000112449	Srp54b	NA	20.732	28.757
ENSMUSG00000079108	Srp54c	10.172	17.159	29.927
ENSMUSG00000020780	Srp68	NA	NA	15.529
ENSMUSG00000036323	Srp72	NA	NA	10.519
ENSMUSG00000026511	Srp9	13.509	NA	10.438
ENSMUSG00000062604	Srpk2	NA	NA	13.543
ENSMUSG00000032553	Srprb	NA	10.332	13.391
ENSMUSG00000039218	Srrm2	14.272	14.574	NA
ENSMUSG00000018379	Srsf1	NA	11.455	NA
ENSMUSG00000055436	Srsf11	NA	15.549	18.831
ENSMUSG00000071172	Srsf3	11.963	10.317	NA
ENSMUSG00000021134	Srsf5	NA	10.424	16.142
ENSMUSG00000024097	Srsf7	NA	10.337	NA
ENSMUSG00000068882	Ssb	NA	15.863	16.153
ENSMUSG00000003992	Ssbp2	NA	NA	12.57
ENSMUSG00000061887	Ssbp3	NA	11.16	NA
ENSMUSG00000029038	Ssu72	NA	12.662	14.628
ENSMUSG00000056091	St3gal5	13.731	18.571	15.643
ENSMUSG00000079442	St6galnac4	NA	NA	13.906
ENSMUSG00000045576	St7l	14.083	15.679	13.351
ENSMUSG00000025862	Stag2	10.408	NA	NA
ENSMUSG00000026718	Stam	NA	NA	10.651
ENSMUSG00000027367	Stard7	NA	NA	16.751
ENSMUSG00000020303	Stc2	10.507	NA	NA
ENSMUSG00000024966	Stip1	NA	NA	13.677
ENSMUSG00000026277	Stk25	NA	NA	12.017
ENSMUSG00000027030	Stk39	12.862	NA	NA
ENSMUSG00000028832	Stmn1	NA	18.012	24.073
ENSMUSG00000027500	Stmn2	13.392	NA	11.216
ENSMUSG00000026915	Strbp	NA	15.282	24.145
ENSMUSG00000014601	Strip1	10.592	15.252	16.949
ENSMUSG00000020954	Strn3	NA	13.031	13.735
ENSMUSG00000032116	Stt3a	NA	NA	12.605
ENSMUSG00000026797	Stxbp1	NA	17.047	NA
ENSMUSG00000022205	Sub1	10.971	11.024	11.001
ENSMUSG00000022110	Sucla2	NA	15.701	13.834
ENSMUSG00000052738	Suclg1	NA	NA	16.533
ENSMUSG00000022024	Sugt1	NA	NA	11.956
ENSMUSG00000018865	Sult4a1	NA	NA	20.209
ENSMUSG00000035726	Supt16	12.637	11.848	NA
ENSMUSG00000020485	Supt4a	NA	NA	16.16
ENSMUSG00000038486	Sv2a	NA	11.51	NA
ENSMUSG00000053025	Sv2b	13.066	NA	19.976
ENSMUSG00000051111	Sv2c	NA	NA	11.963
ENSMUSG00000022340	Sybu	13.656	10.322	16.515
ENSMUSG00000009394	Syn2	NA	12.366	32.931
ENSMUSG00000022973	Synj1	NA	11.147	10.918
ENSMUSG00000056296	Synpr	13.047	27.402	20.508
ENSMUSG00000031144	Syp	NA	NA	10.85
ENSMUSG00000068923	Syt11	NA	13.314	16.726
ENSMUSG00000026452	Syt2	36.071	50.428	15.379
ENSMUSG00000024261	Syt4	16.26	13.415	21.273
ENSMUSG00000024743	Syt7	NA	NA	12.707
ENSMUSG00000024807	Syvn1	NA	NA	10.343
ENSMUSG00000052293	Taf9	NA	NA	10.04
ENSMUSG00000022658	Tagln3	13.345	NA	NA
ENSMUSG00000046985	Tapt1	NA	NA	11.601
ENSMUSG00000022241	Tars	10.929	11.663	26.192
ENSMUSG00000020130	Tbc1d15	NA	16.231	NA
ENSMUSG00000031709	Tbc1d9	NA	14.694	12.416
ENSMUSG00000027630	Tbl1xr1	NA	NA	11.951
ENSMUSG00000071359	Tbpl1	14.116	NA	10.164
ENSMUSG00000036667	Tcaf1	NA	NA	19.827
ENSMUSG00000033813	Tcea1	12.916	12.78	22.231
ENSMUSG00000044550	Tceal3	13.897	24.304	42.082
ENSMUSG00000054034	Tceal5	15.238	27.419	48.303
ENSMUSG00000031409	Tceal6	15.679	25.662	44.911
ENSMUSG00000051579	Tceal8	15.237	11.795	NA
ENSMUSG00000024498	Tcerg1	NA	13.385	NA
ENSMUSG00000001472	Tcf25	NA	10.357	17.885
ENSMUSG00000068039	Tcp1	NA	12.571	15.034
ENSMUSG00000027175	Tcp11l1	NA	10.804	NA
ENSMUSG00000034674	Tdg	NA	NA	14.724
ENSMUSG00000031708	Tecr	NA	11.143	NA
ENSMUSG00000022757	Tfg	NA	NA	22.253
ENSMUSG00000022797	Tfrc	NA	NA	10.776
ENSMUSG00000043962	Thrap3	12.044	NA	16.063
ENSMUSG00000032011	Thy1	19.503	22.407	18.239
ENSMUSG00000027076	Timm10	NA	NA	13.731
ENSMUSG00000013701	Timm23	NA	10.591	13.66
ENSMUSG00000017466	Timp2	NA	12.174	18.291
ENSMUSG00000040843	Tiprl	10.927	NA	10.836
ENSMUSG00000028563	Tm2d1	NA	13.791	NA
ENSMUSG00000031556	Tm2d2	NA	13.398	14.077
ENSMUSG00000078681	Tm2d3	NA	14.516	18.738
ENSMUSG00000023010	Tmbim6	10.639	NA	NA
ENSMUSG00000052428	Tmco1	NA	NA	11.155
ENSMUSG00000029390	Tmed2	NA	10.251	NA
ENSMUSG00000063406	Tmed5	11.092	NA	NA
ENSMUSG00000029571	Tmem106b	12.731	11.673	NA
ENSMUSG00000034659	Tmem109	NA	15.185	18.074
ENSMUSG00000043388	Tmem130	14.534	24.688	14.166
ENSMUSG00000024736	Tmem132a	12.824	14.2	34.674
ENSMUSG00000039428	Tmem135	NA	NA	16.467
ENSMUSG00000026347	Tmem163	NA	NA	10.191
ENSMUSG00000024245	Tmem178	15.248	26.689	13.694
ENSMUSG00000029782	Tmem209	NA	11.439	17.631
ENSMUSG00000074634	Tmem267	NA	12.451	NA
ENSMUSG00000037720	Tmem33	NA	12.081	24.827
ENSMUSG00000033578	Tmem35a	NA	11.801	24.222
ENSMUSG00000025666	Tmem47	NA	NA	11.865
ENSMUSG00000028618	Tmem59	15.781	18.484	14.056
ENSMUSG00000036026	Tmem63b	NA	NA	14.779
ENSMUSG00000034145	Tmem63c	NA	11.686	12.554
ENSMUSG00000062373	Tmem65	NA	NA	13.941
ENSMUSG00000028232	Tmem68	NA	11.412	20.631
ENSMUSG00000033808	Tmem87a	NA	NA	22.21
ENSMUSG00000026411	Tmem9	NA	10.62	18.604
ENSMUSG00000030059	Tmf1	NA	11.844	14.833
ENSMUSG00000019961	Tmpo	NA	11.888	NA
ENSMUSG00000021072	Tmx1	13.66	NA	NA
ENSMUSG00000050043	Tmx2	12.299	10.696	11.626
ENSMUSG00000024614	Tmx3	10.055	11.909	18.718
ENSMUSG00000034723	Tmx4	NA	11.902	32.097
ENSMUSG00000031529	Tnks	NA	12.637	NA
ENSMUSG00000024811	Tnks2	10.963	NA	11.628
ENSMUSG00000009470	Tnpo1	NA	NA	13.938
ENSMUSG00000037573	Tob1	NA	12.547	20.615
ENSMUSG00000000538	Tom1l2	NA	17.936	12.138
ENSMUSG00000093904	Tomm20	12.458	11.779	25.262
ENSMUSG00000022752	Tomm70a	18.307	14.112	19.148
ENSMUSG00000017485	Top2b	NA	15.897	NA
ENSMUSG00000016831	Tox4	NA	20.216	NA
ENSMUSG00000035274	Tpbg	NA	11.583	NA
ENSMUSG00000023456	Tpi1	15.165	20.769	25.036
ENSMUSG00000032366	Tpm1	11.785	NA	NA
ENSMUSG00000027940	Tpm3	15.716	10.385	10.607
ENSMUSG00000041763	Tpp2	NA	12.969	NA
ENSMUSG00000006005	Tpr	NA	11.766	NA
ENSMUSG00000048707	Tprn	NA	NA	14.655
ENSMUSG00000060126	Tpt1	11.035	NA	10.568
ENSMUSG00000022858	Tra2b	10.41	NA	12.883
ENSMUSG00000020628	Trappc12	NA	NA	10.232
ENSMUSG00000079317	Trappc2	NA	NA	25.058
ENSMUSG00000047921	Trappc9	NA	NA	11.604
ENSMUSG00000021712	Trim23	NA	13.292	30.407
ENSMUSG00000036989	Trim3	13.54	NA	NA
ENSMUSG00000051675	Trim32	NA	11.149	10.228
ENSMUSG00000025034	Trim8	NA	NA	11.957
ENSMUSG00000041203	Trir	NA	10.511	NA
ENSMUSG00000018199	Trove2	NA	11.278	16.887
ENSMUSG00000032839	Trpc1	NA	11.732	NA
ENSMUSG00000027716	Trpc3	12.745	11.149	NA
ENSMUSG00000038324	Trpc4ap	NA	NA	10.865
ENSMUSG00000052387	Trpm3	NA	NA	14.969
ENSMUSG00000022010	Tsc22d1	11.928	NA	NA
ENSMUSG00000035585	Tsen34	NA	13.159	NA
ENSMUSG00000040521	Tsfm	NA	NA	12.985
ENSMUSG00000014402	Tsg101	NA	13.515	16.121
ENSMUSG00000056820	Tsnax	NA	NA	11.333
ENSMUSG00000020577	Tspan13	12.266	NA	12.727
ENSMUSG00000032324	Tspan3	14.276	18.186	36.097
ENSMUSG00000028152	Tspan5	11.354	12.06	20.334
ENSMUSG00000047514	Tspyl1	10.95	12.639	19.55
ENSMUSG00000039485	Tspyl4	21.592	33.931	19.514
ENSMUSG00000040785	Ttc3	NA	14.552	17.358
ENSMUSG00000022151	Ttc33	NA	12.951	NA
ENSMUSG00000036565	Ttyh3	NA	11.368	NA
ENSMUSG00000072235	Tuba1a	12.083	14.486	20.375
ENSMUSG00000023004	Tuba1b	15.003	17.022	26.791
ENSMUSG00000043091	Tuba1c	17.129	17.027	26.811
ENSMUSG00000062591	Tubb4a	11.143	11.807	31.366
ENSMUSG00000039530	Tusc3	11.749	12.094	NA
ENSMUSG00000005354	Txn2	10.024	NA	23.7
ENSMUSG00000058407	Txndc9	NA	10.283	NA
ENSMUSG00000061613	U2af1	NA	13.278	19.174
ENSMUSG00000030435	U2af2	NA	10.077	16.065
ENSMUSG00000001924	Uba1	NA	NA	18.154
ENSMUSG00000052997	Uba2	10.874	NA	16.682
ENSMUSG00000030061	Uba3	NA	NA	12.761
ENSMUSG00000050628	Ubald2	NA	NA	11.124
ENSMUSG00000032020	Ubash3b	NA	NA	17.514
ENSMUSG00000019505	Ubb	21.75	23.115	66.872
ENSMUSG00000008348	Ubc	12.729	20.555	40.851
ENSMUSG00000016308	Ube2a	NA	12.33	12.394
ENSMUSG00000078578	Ube2d3	10.462	NA	12.091
ENSMUSG00000021774	Ube2e1	NA	12.946	NA
ENSMUSG00000027011	Ube2e3	10.433	18.124	14.824
ENSMUSG00000027011	Ube2e3	NA	20.893	15.593
ENSMUSG00000009293	Ube2g2	NA	NA	10.51
ENSMUSG00000015120	Ube2i	10.222	10.502	15.888
ENSMUSG00000028277	Ube2j1	NA	11.154	NA
ENSMUSG00000005575	Ube2m	NA	12.871	15.442
ENSMUSG00000042572	Ube2q1	NA	NA	10.797
ENSMUSG00000032307	Ube2q2	NA	10.91	NA
ENSMUSG00000078923	Ube2v1	NA	NA	14.04
ENSMUSG00000022674	Ube2v2	NA	10.872	17.299
ENSMUSG00000025326	Ube3a	NA	11.586	NA
ENSMUSG00000028960	Ube4b	NA	17.874	30.405
ENSMUSG00000005312	Ubqln1	11.389	15.895	NA
ENSMUSG00000050148	Ubqln2	NA	12.95	NA
ENSMUSG00000008604	Ubqln4	NA	11.547	47.785
ENSMUSG00000044308	Ubr3	11.792	NA	16.32
ENSMUSG00000020634	Ubxn2a	12.246	NA	NA
ENSMUSG00000026353	Ubxn4	NA	11.283	NA
ENSMUSG00000029223	Uchl1	12.608	23.166	29.518
ENSMUSG00000002550	Uck1	NA	NA	18.177
ENSMUSG00000005262	Ufd1	16.114	12.083	12.353
ENSMUSG00000031634	Ufsp2	10.391	NA	NA
ENSMUSG00000028381	Ugcg	NA	NA	12.462
ENSMUSG00000020099	Unc5b	NA	NA	10.486
ENSMUSG00000058301	Upf1	NA	11.539	NA
ENSMUSG00000071654	Uqcc3	NA	20.035	NA
ENSMUSG00000059534	Uqcr10	NA	11.869	12.133
ENSMUSG00000020163	Uqcr11	NA	NA	14.81
ENSMUSG00000021520	Uqcrb	15.279	17.403	NA
ENSMUSG00000025651	Uqcrc1	12.132	11.252	NA
ENSMUSG00000038462	Uqcrfs1	12.089	NA	NA
ENSMUSG00000071528	Usmg5	33.042	27.222	53.464
ENSMUSG00000029407	Uso1	NA	NA	14.568
ENSMUSG00000042506	Usp22	NA	11.619	12.245
ENSMUSG00000025437	Usp33	NA	15.347	18.606
ENSMUSG00000054814	Usp46	NA	NA	17.511
ENSMUSG00000059263	Usp47	NA	10.251	NA
ENSMUSG00000022710	Usp7	12.492	13.289	14.406
ENSMUSG00000031010	Usp9x	13.359	14.634	25.691
ENSMUSG00000020894	Vamp2	13.31	30.956	29.273
ENSMUSG00000026696	Vamp4	NA	13.155	10.167
ENSMUSG00000024091	Vapa	NA	NA	23.268
ENSMUSG00000046844	Vat1l	NA	14.967	NA
ENSMUSG00000028452	Vcp	NA	14.78	27.156
ENSMUSG00000008892	Vdac3	12.194	13.475	14.629
ENSMUSG00000023951	Vegfa	NA	NA	12.265
ENSMUSG00000018377	Vezf1	NA	NA	11.831
ENSMUSG00000073131	Vma21	12.965	NA	NA
ENSMUSG00000061619	Vma21-ps	14.863	NA	NA
ENSMUSG00000018171	Vmp1	NA	NA	11.399
ENSMUSG00000029462	Vps29	NA	NA	14.143
ENSMUSG00000029434	Vps33a	NA	NA	15.802
ENSMUSG00000031696	Vps35	NA	NA	14.73
ENSMUSG00000041236	Vps41	NA	12	NA
ENSMUSG00000001376	Vps50	10.13	NA	NA
ENSMUSG00000024797	Vps51	NA	NA	23.605
ENSMUSG00000017288	Vps53	NA	12.3	NA
ENSMUSG00000008958	Vps72	NA	10.558	NA
ENSMUSG00000054459	Vsnl1	21.935	16.675	43.425
ENSMUSG00000019868	Vta1	NA	10.772	NA
ENSMUSG00000021124	Vti1b	NA	NA	27.003
ENSMUSG00000024283	Wac	NA	10.787	NA
ENSMUSG00000019831	Wasf1	NA	14.951	15.158
ENSMUSG00000024104	Washc2	NA	11.959	11.312
ENSMUSG00000020056	Washc3	NA	NA	10.388
ENSMUSG00000034560	Washc4	NA	10.559	NA
ENSMUSG00000029684	Wasl	10.745	NA	NA
ENSMUSG00000030216	Wbp11	NA	14.524	11.561
ENSMUSG00000034341	Wbp2	NA	13.962	16.519
ENSMUSG00000005103	Wdr1	NA	11.26	13.885
ENSMUSG00000021147	Wdr37	NA	NA	15.736
ENSMUSG00000061559	Wdr61	NA	NA	11.747
ENSMUSG00000020257	Wdr82	NA	NA	12.382
ENSMUSG00000021400	Wrnip1	NA	10.479	11.754
ENSMUSG00000063430	Wscd2	NA	NA	26.423
ENSMUSG00000022100	Xpo7	NA	NA	10.084
ENSMUSG00000034667	Xpot	NA	14.612	19.497
ENSMUSG00000028639	Ybx1	12.337	11.134	16.338
ENSMUSG00000030189	Ybx3	13.105	11.238	14.804
ENSMUSG00000071074	Yipf3	NA	10.585	NA
ENSMUSG00000026775	Yme1l1	NA	10.38	NA
ENSMUSG00000039770	Ypel5	NA	NA	14.074
ENSMUSG00000028889	Yrdc	NA	NA	15.913
ENSMUSG00000020849	Ywhae	16.816	17.051	21.101
ENSMUSG00000076432	Ywhaq	NA	10.405	NA
ENSMUSG00000022285	Ywhaz	16.032	24.832	27.4
ENSMUSG00000021264	Yy1	NA	NA	11.952
ENSMUSG00000034173	Zbed5	34.764	36.853	49.989
ENSMUSG00000063659	Zbtb18	13.825	27.486	25.347
ENSMUSG00000035011	Zbtb7a	NA	15.152	NA
ENSMUSG00000043542	Zc2hc1a	NA	NA	13.68
ENSMUSG00000021012	Zc3h14	NA	10.701	NA
ENSMUSG00000027091	Zc3h15	NA	NA	13.247
ENSMUSG00000031428	Zcchc18	NA	17.145	26.868
ENSMUSG00000024750	Zfand5	NA	11.905	NA
ENSMUSG00000030629	Zfand6	NA	NA	16.65
ENSMUSG00000051469	Zfp24	NA	NA	14.806
ENSMUSG00000060510	Zfp266	NA	17.855	NA
ENSMUSG00000059878	Zfp422	NA	10.503	NA
ENSMUSG00000007812	Zfp655	NA	11.572	NA
ENSMUSG00000085795	Zfp703	NA	NA	27.751
ENSMUSG00000024298	Zfp871	NA	17.647	NA
ENSMUSG00000022201	Zfr	10.593	15.008	16.397
ENSMUSG00000061524	Zic2	15.911	NA	NA
ENSMUSG00000007817	Zmiz1	NA	NA	23.801
ENSMUSG00000030967	Zranb1	NA	14.82	NA
ENSMUSG00000044068	Zrsr1	NA	15.105	NA
ENSMUSG00000022228	Zscan26	10.384	NA	NA
ENSMUSG00000034636	Zyg11b	10.257	NA	42.233

## Sheet: NMF205 Pause gene
gene_id	gene_name	J_NMF205_1	J_NMF205_2	J_NMF205_3
ENSMUSG00000047466	8030462N17Rik	16.27	NA	19.991
ENSMUSG00000057715	A830018L16Rik	10.351	NA	NA
ENSMUSG00000057230	Aak1	13.347	NA	NA
ENSMUSG00000031960	Aars	18.658	10.406	NA
ENSMUSG00000075528	Aarsd1	NA	NA	11.672
ENSMUSG00000018697	Aatf	11.114	NA	NA
ENSMUSG00000057880	Abat	NA	NA	15.81
ENSMUSG00000058355	Abce1	NA	NA	11.523
ENSMUSG00000028953	Abcf2	10.087	NA	10.236
ENSMUSG00000007036	Abhd16a	22.029	19.359	10.74
ENSMUSG00000047368	Abhd17b	NA	NA	10.131
ENSMUSG00000036138	Acaa1a	17.076	NA	NA
ENSMUSG00000049076	Acap2	10.143	NA	NA
ENSMUSG00000029033	Acap3	NA	NA	12.099
ENSMUSG00000026499	Acbd3	13.081	NA	12.798
ENSMUSG00000002103	Acp2	12.898	NA	15.408
ENSMUSG00000020333	Acsl6	NA	NA	11.269
ENSMUSG00000025228	Actr1a	NA	11.714	NA
ENSMUSG00000000532	Acvr1b	NA	NA	13.574
ENSMUSG00000008822	Acyp1	NA	NA	11.339
ENSMUSG00000040537	Adam22	13.437	NA	NA
ENSMUSG00000027951	Adar	10.539	NA	18.387
ENSMUSG00000020431	Adcy1	NA	NA	12.376
ENSMUSG00000029106	Add1	10.89	NA	NA
ENSMUSG00000033569	Adgrb3	NA	NA	16.368
ENSMUSG00000020629	Adi1	10.924	NA	NA
ENSMUSG00000057134	Ado	14.32	11.128	21.58
ENSMUSG00000002844	Adprh	NA	NA	12.287
ENSMUSG00000025083	Afap1l2	19.095	10.831	29.611
ENSMUSG00000049470	Aff4	NA	NA	10.113
ENSMUSG00000049659	Aftph	NA	NA	15.435
ENSMUSG00000019806	Aig1	NA	NA	12.616
ENSMUSG00000022016	Akap11	13.496	NA	NA
ENSMUSG00000028692	Akr1a1	NA	NA	10.951
ENSMUSG00000025007	Aldh18a1	11.406	NA	10.393
ENSMUSG00000017390	Aldoc	11.071	NA	NA
ENSMUSG00000075470	Alg10b	NA	NA	16.377
ENSMUSG00000039740	Alg2	15.682	16.233	NA
ENSMUSG00000031751	Amfr	NA	12.609	13.052
ENSMUSG00000026965	Anapc2	NA	NA	11.433
ENSMUSG00000032826	Ank2	11.294	12.361	13.279
ENSMUSG00000041870	Ankrd13a	13.035	NA	NA
ENSMUSG00000057766	Ankrd29	NA	NA	15.667
ENSMUSG00000014498	Ankrd52	11.88	NA	NA
ENSMUSG00000058589	Anks1b	11.7	15.481	19.249
ENSMUSG00000015749	Anp32e	NA	11.836	NA
ENSMUSG00000021814	Anxa7	NA	NA	10.214
ENSMUSG00000074238	Ap1ar	NA	NA	10.316
ENSMUSG00000031367	Ap1s2	NA	NA	12.657
ENSMUSG00000022841	Ap2m1	NA	NA	14.116
ENSMUSG00000020198	Ap3d1	23.694	NA	25.187
ENSMUSG00000036291	Ap5m1	10.607	NA	NA
ENSMUSG00000024897	Apba1	NA	NA	12.425
ENSMUSG00000035960	Apex1	10.458	NA	14.736
ENSMUSG00000027193	Api5	NA	NA	10.101
ENSMUSG00000031996	Aplp2	22.346	NA	21.099
ENSMUSG00000022892	App	34.223	36.439	44.597
ENSMUSG00000032096	Arcn1	NA	NA	10.503
ENSMUSG00000062421	Arf2	NA	NA	11.059
ENSMUSG00000033389	Arhgap44	NA	NA	11.312
ENSMUSG00000035133	Arhgap5	NA	NA	14.367
ENSMUSG00000054901	Arhgef33	16.49	NA	10.51
ENSMUSG00000031511	Arhgef7	11.756	16.261	15.119
ENSMUSG00000060904	Arl1	12.039	NA	NA
ENSMUSG00000027122	Arl14ep	15.753	23.853	21.03
ENSMUSG00000047446	Arl4a	17.011	10.095	NA
ENSMUSG00000022722	Arl6	NA	NA	14.396
ENSMUSG00000029621	Arpc1a	NA	NA	11.536
ENSMUSG00000042082	Arsb	12.228	NA	NA
ENSMUSG00000048175	Asb8	10.615	NA	NA
ENSMUSG00000029752	Asns	20.118	NA	16.527
ENSMUSG00000028207	Asph	17.273	22.972	57.061
ENSMUSG00000028373	Astn2	14.026	NA	NA
ENSMUSG00000013662	Atad1	NA	NA	16.051
ENSMUSG00000030850	Ate1	12.085	NA	NA
ENSMUSG00000026663	Atf6	NA	NA	15.991
ENSMUSG00000026280	Atg4b	16.383	NA	NA
ENSMUSG00000059811	Atl2	15.609	NA	10.714
ENSMUSG00000033161	Atp1a1	18.37	18.54	44.597
ENSMUSG00000026576	Atp1b1	10.46	NA	NA
ENSMUSG00000041329	Atp1b2	10.307	NA	15.813
ENSMUSG00000029467	Atp2a2	10.754	NA	NA
ENSMUSG00000020788	Atp2a3	NA	NA	11.293
ENSMUSG00000019943	Atp2b1	19.47	NA	NA
ENSMUSG00000031376	Atp2b3	11.619	NA	NA
ENSMUSG00000025428	Atp5a1	19.323	14.038	30.329
ENSMUSG00000025393	Atp5b	NA	NA	21.09
ENSMUSG00000038690	Atp5j2	12.357	11.446	NA
ENSMUSG00000050856	Atp5k	NA	NA	11.951
ENSMUSG00000071528	Atp5md	19.287	23.916	40.913
ENSMUSG00000000563	Atp5pb	NA	NA	10.19
ENSMUSG00000019302	Atp6v0a1	25.324	NA	NA
ENSMUSG00000052459	Atp6v1a	11.634	10.683	12.121
ENSMUSG00000006273	Atp6v1b2	13.26	10.73	14.142
ENSMUSG00000019210	Atp6v1e1	NA	13.942	12.442
ENSMUSG00000033793	Atp6v1h	NA	NA	13.968
ENSMUSG00000037685	Atp8a1	11.88	NA	20.5
ENSMUSG00000016541	Atxn10	NA	NA	12.202
ENSMUSG00000042605	Atxn2	NA	NA	22.161
ENSMUSG00000032637	Atxn2l	NA	13.609	14.804
ENSMUSG00000068328	Aup1	NA	NA	14.355
ENSMUSG00000045767	B230219D22Rik	NA	NA	12.179
ENSMUSG00000033849	B3galt2	NA	NA	10.481
ENSMUSG00000056124	B4galt6	NA	NA	11.894
ENSMUSG00000047379	B4gat1	10.551	NA	NA
ENSMUSG00000022508	Bcl6	28.517	NA	33.709
ENSMUSG00000037608	Bclaf1	15.175	NA	31.913
ENSMUSG00000050071	Bex1	NA	NA	16.465
ENSMUSG00000042750	Bex2	13.134	NA	12.163
ENSMUSG00000046432	Bex3	NA	NA	13.549
ENSMUSG00000030103	Bhlhe40	NA	NA	20.434
ENSMUSG00000030256	Bhlhe41	NA	10.859	NA
ENSMUSG00000001999	Blvra	NA	NA	10.187
ENSMUSG00000047721	Bola2	NA	NA	22.898
ENSMUSG00000066324	Bpnt2	NA	NA	10.823
ENSMUSG00000002413	Braf	NA	NA	10.121
ENSMUSG00000029458	Brap	NA	NA	22.966
ENSMUSG00000003778	Brd8	NA	NA	13.626
ENSMUSG00000028351	Brinp1	NA	NA	14.09
ENSMUSG00000022247	Brix1	NA	NA	14.823
ENSMUSG00000111375	Btbd8	10.395	NA	36.992
ENSMUSG00000051223	Bzw1	12.714	NA	15.334
ENSMUSG00000000581	C1d	NA	NA	11.044
ENSMUSG00000017412	Cacnb4	10.107	NA	NA
ENSMUSG00000032076	Cadm1	NA	NA	13.22
ENSMUSG00000064115	Cadm2	12.946	NA	NA
ENSMUSG00000005338	Cadm3	14.023	14.41	27.464
ENSMUSG00000054793	Cadm4	NA	NA	18.804
ENSMUSG00000017978	Cadps2	12.846	NA	NA
ENSMUSG00000003657	Calb2	17.309	11.894	10.588
ENSMUSG00000001175	Calm1	47.048	21.715	36.61
ENSMUSG00000036438	Calm2	14.238	11.376	NA
ENSMUSG00000019370	Calm3	27.023	27.059	17.239
ENSMUSG00000025468	Caly	13.084	NA	NA
ENSMUSG00000057897	Camk2b	55.189	NA	30.398
ENSMUSG00000051146	Camk2n2	NA	NA	10.5
ENSMUSG00000038128	Camk4	12.549	10.682	12.238
ENSMUSG00000029471	Camkk2	10.201	NA	NA
ENSMUSG00000014592	Camta1	18.23	24.664	38.032
ENSMUSG00000020114	Cand1	NA	NA	13.257
ENSMUSG00000027184	Caprin1	14.272	NA	11.965
ENSMUSG00000041261	Car8	NA	10.247	NA
ENSMUSG00000029836	Cbx3	12.587	NA	15.29
ENSMUSG00000020074	Ccar1	NA	NA	13.251
ENSMUSG00000029769	Ccdc136	NA	NA	10.553
ENSMUSG00000078622	Ccdc47	13.307	NA	NA
ENSMUSG00000023572	Ccndbp1	22.989	NA	12.871
ENSMUSG00000029385	Ccng2	NA	NA	11.352
ENSMUSG00000021548	Ccnh	NA	11.99	13.349
ENSMUSG00000034024	Cct2	13.735	16.667	NA
ENSMUSG00000001416	Cct3	NA	NA	17.111
ENSMUSG00000007739	Cct4	12.51	NA	22.712
ENSMUSG00000030007	Cct7	15.107	12.948	16.23
ENSMUSG00000025613	Cct8	NA	NA	11.843
ENSMUSG00000038446	Cdc40	NA	NA	14.511
ENSMUSG00000023067	Cdkn1a	12.46	10.174	21.324
ENSMUSG00000003031	Cdkn1b	18.389	NA	27.607
ENSMUSG00000058793	Cds2	12.853	NA	17.769
ENSMUSG00000027035	Cers6	14.345	NA	NA
ENSMUSG00000021537	Cetn3	NA	NA	14.043
ENSMUSG00000020462	Cfap36	NA	NA	11.636
ENSMUSG00000027350	Chgb	17.039	12.349	45.781
ENSMUSG00000024843	Chka	NA	NA	11.292
ENSMUSG00000030077	Chl1	21.531	13.097	10.468
ENSMUSG00000004633	Chn2	12.804	13.906	16.234
ENSMUSG00000001774	Chordc1	NA	NA	11.361
ENSMUSG00000026080	Chst10	NA	NA	14.326
ENSMUSG00000003662	Ciao1	NA	NA	11.429
ENSMUSG00000039910	Cited2	13.971	NA	20.614
ENSMUSG00000040549	Ckap5	14.444	NA	16.662
ENSMUSG00000000308	Ckmt1	12.18	NA	14.111
ENSMUSG00000033392	Clasp2	14.272	NA	12.224
ENSMUSG00000013921	Clip3	15.163	NA	30.03
ENSMUSG00000026034	Clk1	29.462	NA	15.806
ENSMUSG00000015357	Clpx	NA	NA	12.052
ENSMUSG00000047126	Cltc	10.524	NA	13.503
ENSMUSG00000041216	Clvs1	11.69	NA	NA
ENSMUSG00000024644	Cndp2	11.332	NA	12.19
ENSMUSG00000025658	Cnksr2	28.093	NA	10.923
ENSMUSG00000015202	Cnksr3	12.738	NA	NA
ENSMUSG00000025189	Cnnm1	NA	NA	12.065
ENSMUSG00000003135	Cnot11	NA	NA	10.2
ENSMUSG00000044629	Cnrip1	NA	10.542	10.339
ENSMUSG00000038949	Cnst	NA	NA	12.269
ENSMUSG00000055022	Cntn1	NA	NA	12.512
ENSMUSG00000053024	Cntn2	14.211	NA	19.412
ENSMUSG00000039419	Cntnap2	15.14	13.332	NA
ENSMUSG00000001435	Col18a1	NA	11.279	NA
ENSMUSG00000027570	Col9a3	NA	NA	12.644
ENSMUSG00000051154	Commd3	NA	10.381	23.571
ENSMUSG00000026553	Copa	10.506	NA	11.178
ENSMUSG00000032458	Copb2	12.384	NA	NA
ENSMUSG00000025607	Copg2	20.946	NA	NA
ENSMUSG00000030127	Cops7a	NA	NA	17.553
ENSMUSG00000030707	Coro1a	27.327	NA	10.48
ENSMUSG00000026500	Cox20	10.445	NA	13.115
ENSMUSG00000031818	Cox4i1	14.787	12.412	15.421
ENSMUSG00000041697	Cox6a1	18.327	11.28	NA
ENSMUSG00000032330	Cox7a2	12.402	NA	NA
ENSMUSG00000024248	Cox7a2l	NA	NA	14.522
ENSMUSG00000020841	Cpd	10.184	NA	NA
ENSMUSG00000020300	Cpeb4	NA	NA	13.225
ENSMUSG00000039007	Cpq	10.594	NA	NA
ENSMUSG00000027357	Crls1	NA	NA	10.413
ENSMUSG00000029121	Crmp1	20.566	NA	NA
ENSMUSG00000020038	Cry1	14.474	NA	15.012
ENSMUSG00000058240	Cryzl1	NA	NA	10.063
ENSMUSG00000068823	Csde1	12.106	NA	NA
ENSMUSG00000025162	Csnk1d	15.823	NA	NA
ENSMUSG00000073563	Csnk1g3	NA	NA	11.191
ENSMUSG00000074698	Csnk2a1	NA	NA	14.817
ENSMUSG00000101523	Csnk2a1-ps3	NA	NA	14.946
ENSMUSG00000053536	Cstf2t	NA	NA	24.889
ENSMUSG00000005698	Ctcf	NA	NA	10.889
ENSMUSG00000018559	Ctdnep1	14.244	NA	NA
ENSMUSG00000006932	Ctnnb1	13.639	NA	NA
ENSMUSG00000007891	Ctsd	NA	NA	12.919
ENSMUSG00000021477	Ctsl	NA	NA	10.096
ENSMUSG00000036748	Cuedc2	NA	NA	22.5
ENSMUSG00000004364	Cul3	12.048	NA	10.44
ENSMUSG00000031095	Cul4b	NA	NA	15.629
ENSMUSG00000004096	Cwc15	18.474	NA	19.207
ENSMUSG00000026456	Cyb5r1	NA	NA	10.529
ENSMUSG00000022551	Cyc1	10.817	NA	NA
ENSMUSG00000030447	Cyfip1	10.076	NA	NA
ENSMUSG00000020340	Cyfip2	10.67	NA	NA
ENSMUSG00000061740	Cyp2d22	NA	NA	36.755
ENSMUSG00000021259	Cyp46a1	NA	10.223	NA
ENSMUSG00000022378	Cyrib	NA	NA	10.884
ENSMUSG00000068921	Dap3	12.238	NA	10.086
ENSMUSG00000116429	Ddit3	NA	NA	11.613
ENSMUSG00000055065	Ddx17	13.58	NA	10.811
ENSMUSG00000001674	Ddx18	NA	NA	10.472
ENSMUSG00000015023	Ddx19a	NA	NA	10.677
ENSMUSG00000003360	Ddx23	NA	NA	10.189
ENSMUSG00000000787	Ddx3x	12.325	11.039	17.484
ENSMUSG00000020705	Ddx42	14.433	NA	13.279
ENSMUSG00000020719	Ddx5	29.011	16.495	31.524
ENSMUSG00000070738	Dgkd	NA	NA	10.146
ENSMUSG00000040479	Dgkz	NA	16.184	NA
ENSMUSG00000034449	Dhrs11	NA	NA	13.575
ENSMUSG00000021094	Dhrs7	13.461	NA	NA
ENSMUSG00000042569	Dhrs7b	14.419	NA	NA
ENSMUSG00000029169	Dhx15	17.779	NA	NA
ENSMUSG00000027770	Dhx36	14.973	NA	14.694
ENSMUSG00000042699	Dhx9	15.861	10.679	NA
ENSMUSG00000023026	Dip2b	NA	10.935	NA
ENSMUSG00000040035	Disp2	17.174	18.356	NA
ENSMUSG00000061689	Dlgap4	NA	NA	11.09
ENSMUSG00000004789	Dlst	11.199	NA	13.173
ENSMUSG00000028410	Dnaja1	NA	NA	18.964
ENSMUSG00000031701	Dnaja2	NA	10.076	NA
ENSMUSG00000036052	Dnajb5	11.528	NA	NA
ENSMUSG00000028528	Dnajc6	NA	NA	16.028
ENSMUSG00000014195	Dnajc7	NA	12.853	16.402
ENSMUSG00000054405	Dnajc8	11.492	NA	NA
ENSMUSG00000026825	Dnm1	10.548	NA	NA
ENSMUSG00000022789	Dnm1l	NA	NA	14.981
ENSMUSG00000020661	Dnmt3a	12.659	10.589	NA
ENSMUSG00000036815	Dpp10	NA	NA	10.37
ENSMUSG00000061576	Dpp6	16.381	NA	NA
ENSMUSG00000040415	Dtx3	NA	NA	12.534
ENSMUSG00000003518	Dusp3	10.733	NA	NA
ENSMUSG00000027203	Dut	NA	NA	19.859
ENSMUSG00000018707	Dync1h1	10.918	15.252	11.611
ENSMUSG00000027012	Dync1i2	NA	NA	13.056
ENSMUSG00000035770	Dync1li2	12.718	11.916	NA
ENSMUSG00000050812	Ecpas	NA	NA	18.824
ENSMUSG00000015092	Edf1	NA	NA	14.345
ENSMUSG00000034994	Eef2	NA	NA	21.074
ENSMUSG00000035530	Eif1	12.755	NA	11.921
ENSMUSG00000029613	Eif2ak1	NA	NA	18.105
ENSMUSG00000074656	Eif2s2	NA	NA	19.043
ENSMUSG00000035150	Eif2s3x	11.836	NA	12.267
ENSMUSG00000024991	Eif3a	12.153	NA	16.102
ENSMUSG00000030738	Eif3c	NA	NA	13.32
ENSMUSG00000022336	Eif3e	10.535	NA	NA
ENSMUSG00000022884	Eif4a2	32.304	16.751	28.086
ENSMUSG00000094973	Eif4a3l1	NA	NA	10.492
ENSMUSG00000058655	Eif4b	NA	10.848	NA
ENSMUSG00000028156	Eif4e	NA	NA	12.294
ENSMUSG00000005610	Eif4g2	12.145	13.807	23.918
ENSMUSG00000028760	Eif4g3	10.441	NA	NA
ENSMUSG00000040731	Eif4h	NA	19.041	13.478
ENSMUSG00000027613	Eif6	NA	NA	11.785
ENSMUSG00000040028	Elavl1	NA	NA	11.282
ENSMUSG00000003410	Elavl3	NA	NA	10.653
ENSMUSG00000041112	Elmo1	12.526	NA	NA
ENSMUSG00000013822	Elof1	10.727	NA	NA
ENSMUSG00000022337	Emc2	12.234	NA	NA
ENSMUSG00000027131	Emc4	NA	NA	11.994
ENSMUSG00000055943	Emc7	NA	10.083	NA
ENSMUSG00000037419	Endod1	NA	NA	10.187
ENSMUSG00000004267	Eno2	NA	NA	15.992
ENSMUSG00000095463	Entpd4	11.465	NA	10.399
ENSMUSG00000022066	Entpd4b	11.22	NA	10.335
ENSMUSG00000024044	Epb41l3	34.137	NA	27.305
ENSMUSG00000046785	Epm2aip1	13.863	NA	NA
ENSMUSG00000026615	Eprs	NA	NA	11.069
ENSMUSG00000028552	Eps15	12.026	NA	12.813
ENSMUSG00000015766	Eps8	22.951	19.876	21.11
ENSMUSG00000001576	Ergic1	12.027	10.317	15.656
ENSMUSG00000020311	Erlec1	NA	NA	11.214
ENSMUSG00000028343	Erp44	10.767	NA	NA
ENSMUSG00000021996	Esd	NA	NA	14.932
ENSMUSG00000026610	Esrrg	10.832	NA	NA
ENSMUSG00000024360	Etf1	17.477	NA	NA
ENSMUSG00000004151	Etv1	10.219	NA	20.793
ENSMUSG00000033769	Exoc6b	10.468	NA	NA
ENSMUSG00000027714	Exosc9	NA	NA	10.958
ENSMUSG00000027963	Extl2	NA	NA	10.437
ENSMUSG00000044788	Fads6	11.369	NA	NA
ENSMUSG00000045316	Fahd1	10.572	NA	NA
ENSMUSG00000050821	Fam131a	NA	NA	20.948
ENSMUSG00000027349	Fam98b	11.201	NA	NA
ENSMUSG00000030303	Far2	NA	11.698	NA
ENSMUSG00000055333	Fat2	20.452	10.365	32.79
ENSMUSG00000038274	Fau	21.086	17.195	17.857
ENSMUSG00000023965	Fbxl17	NA	NA	11.706
ENSMUSG00000005371	Fbxo11	NA	NA	12.282
ENSMUSG00000032898	Fbxo21	NA	NA	12.166
ENSMUSG00000032309	Fbxo22	NA	NA	13.039
ENSMUSG00000047539	Fbxo28	12.894	NA	NA
ENSMUSG00000020271	Fbxw11	NA	NA	21.125
ENSMUSG00000028086	Fbxw7	10.501	NA	11.579
ENSMUSG00000059743	Fdps	10.723	10.664	NA
ENSMUSG00000032244	Fem1b	10.616	NA	NA
ENSMUSG00000033319	Fem1c	11.26	NA	NA
ENSMUSG00000031137	Fgf13	10.454	NA	NA
ENSMUSG00000021974	Fgf9	NA	NA	10.115
ENSMUSG00000026526	Fh1	15.36	NA	NA
ENSMUSG00000020949	Fkbp3	NA	NA	17.206
ENSMUSG00000032633	Flcn	NA	NA	15.107
ENSMUSG00000061981	Flot2	NA	NA	11.651
ENSMUSG00000040097	Flywch1	NA	NA	10.1
ENSMUSG00000035992	Fnip1	NA	NA	11.864
ENSMUSG00000056602	Fry	14.594	NA	13.29
ENSMUSG00000055932	Fto	11.158	NA	NA
ENSMUSG00000055373	Fut9	NA	10.255	NA
ENSMUSG00000019843	Fyn	12.222	NA	NA
ENSMUSG00000022800	Fyttd1	11.77	NA	NA
ENSMUSG00000010803	Gabra1	13.147	NA	16.248
ENSMUSG00000020428	Gabra6	11.873	NA	22.649
ENSMUSG00000007653	Gabrb2	14.803	NA	20.01
ENSMUSG00000033676	Gabrb3	NA	NA	16.379
ENSMUSG00000070880	Gad1	NA	NA	10.103
ENSMUSG00000026787	Gad2	11.302	NA	10.862
ENSMUSG00000000420	Galnt1	11.997	NA	NA
ENSMUSG00000047261	Gap43	13.384	NA	11.246
ENSMUSG00000029777	Gars	22.15	NA	19.631
ENSMUSG00000031451	Gas6	13.157	NA	NA
ENSMUSG00000042390	Gatad2b	20.164	13.413	NA
ENSMUSG00000028467	Gba2	NA	NA	10.534
ENSMUSG00000017943	Gdap1l1	12.275	NA	NA
ENSMUSG00000021218	Gdi2	24.827	NA	NA
ENSMUSG00000020932	Gfap	NA	NA	10.639
ENSMUSG00000020530	Ggnbp2	18.122	NA	NA
ENSMUSG00000041028	Ghitm	18.289	NA	22.915
ENSMUSG00000003316	Glg1	NA	NA	11.229
ENSMUSG00000017286	Glod4	11.726	NA	11.431
ENSMUSG00000028020	Glrb	12.289	11.382	14.05
ENSMUSG00000018196	Glrx2	23.628	NA	13.061
ENSMUSG00000026103	Gls	NA	NA	12.316
ENSMUSG00000022536	Glyr1	NA	NA	16.258
ENSMUSG00000092116	Gm10320	NA	NA	13.02
ENSMUSG00000098559	Gm15013	NA	11.279	NA
ENSMUSG00000090639	Gm20425	NA	13.033	17.678
ENSMUSG00000089739	Gm20431	12.824	NA	NA
ENSMUSG00000097239	Gm27029	NA	NA	13.954
ENSMUSG00000000948	Gm38393	17.228	10	15.839
ENSMUSG00000111410	Gm49337	NA	NA	13.404
ENSMUSG00000117081	Gm49948	25.667	11.931	26.021
ENSMUSG00000049235	Gm7324	11.438	NA	NA
ENSMUSG00000049124	Gm8186	NA	NA	13.566
ENSMUSG00000044424	Gm9493	NA	18.731	15.496
ENSMUSG00000062014	Gmfb	12.508	NA	14.168
ENSMUSG00000027823	Gmps	11.678	NA	NA
ENSMUSG00000000001	Gnai3	NA	NA	12.752
ENSMUSG00000031748	Gnao1	NA	NA	15.206
ENSMUSG00000029064	Gnb1	11.62	11.336	NA
ENSMUSG00000015341	Golga7	NA	NA	16.016
ENSMUSG00000019861	Gopc	14.783	NA	NA
ENSMUSG00000014959	Gorasp2	NA	10.607	11.134
ENSMUSG00000025190	Got1	19.48	10.401	10.667
ENSMUSG00000026827	Gpd2	14.683	NA	10.653
ENSMUSG00000047454	Gphn	15.555	NA	14.543
ENSMUSG00000031517	Gpm6a	NA	11.887	38.566
ENSMUSG00000031342	Gpm6b	12.537	NA	11.733
ENSMUSG00000045967	Gpr158	12.486	NA	14.498
ENSMUSG00000043384	Gprasp1	NA	10.862	NA
ENSMUSG00000072966	Gprasp2	NA	10.172	NA
ENSMUSG00000008734	Gprc5b	14.169	NA	14.104
ENSMUSG00000069227	Gprin1	NA	NA	19.378
ENSMUSG00000025156	Gps1	17.298	NA	NA
ENSMUSG00000033981	Gria2	NA	NA	15.693
ENSMUSG00000001986	Gria3	NA	NA	11.062
ENSMUSG00000010825	Grid2ip	13.145	NA	NA
ENSMUSG00000026959	Grin1	NA	NA	10.093
ENSMUSG00000022564	Grina	10.752	10.29	NA
ENSMUSG00000034708	Grn	NA	12.302	NA
ENSMUSG00000022812	Gsk3b	NA	NA	12.552
ENSMUSG00000044715	Gskip	NA	NA	16.547
ENSMUSG00000025068	Gsto1	NA	NA	10.503
ENSMUSG00000061232	H2-K1	16.7	NA	11.029
ENSMUSG00000016559	H3f3b	30.363	25.34	51.876
ENSMUSG00000067455	H4c11	14.048	NA	NA
ENSMUSG00000091405	H4c14	74.277	59.134	89.181
ENSMUSG00000024158	Hagh	14.212	12.356	18.255
ENSMUSG00000006930	Hap1	NA	NA	10.55
ENSMUSG00000027018	Hat1	10.314	NA	NA
ENSMUSG00000021730	Hcn1	NA	NA	14.655
ENSMUSG00000002833	Hdgfl2	14.626	NA	11.632
ENSMUSG00000034088	Hdlbp	NA	NA	11.236
ENSMUSG00000029804	Herc3	10.182	NA	16.626
ENSMUSG00000031770	Herpud1	17.482	NA	22.083
ENSMUSG00000008429	Herpud2	NA	NA	10.719
ENSMUSG00000040289	Hey1	17.043	NA	NA
ENSMUSG00000025793	Hgs	12.192	NA	11.219
ENSMUSG00000021109	Hif1a	16.366	NA	10.055
ENSMUSG00000037012	Hk1	18.534	NA	29.781
ENSMUSG00000066551	Hmgb1	26.706	11.859	36.602
ENSMUSG00000021670	Hmgcr	NA	NA	20.67
ENSMUSG00000066456	Hmgn3	11.583	10.389	NA
ENSMUSG00000007836	Hnrnpa0	13.474	NA	26.215
ENSMUSG00000004980	Hnrnpa2b1	13.626	10.164	11.5
ENSMUSG00000059005	Hnrnpa3	26.985	NA	15.132
ENSMUSG00000000568	Hnrnpd	10.629	NA	12.846
ENSMUSG00000029328	Hnrnpdl	NA	NA	13.963
ENSMUSG00000042079	Hnrnpf	13.577	NA	NA
ENSMUSG00000007850	Hnrnph1	12.754	13.228	16.238
ENSMUSG00000015165	Hnrnpl	22.493	NA	NA
ENSMUSG00000024095	Hnrnpll	NA	NA	15.758
ENSMUSG00000039630	Hnrnpu	13.705	NA	12.292
ENSMUSG00000071659	Hnrnpul2	NA	NA	16.977
ENSMUSG00000051022	Hs3st1	NA	NA	12.39
ENSMUSG00000016194	Hsd11b1	NA	NA	11.191
ENSMUSG00000019878	Hsf2	11.72	NA	NA
ENSMUSG00000021270	Hsp90aa1	16.153	12.848	28.02
ENSMUSG00000023944	Hsp90ab1	NA	13.653	27.149
ENSMUSG00000020048	Hsp90b1	10.095	NA	NA
ENSMUSG00000109865	Hspa14	26.151	NA	NA
ENSMUSG00000020361	Hspa4	13.627	NA	11.762
ENSMUSG00000015656	Hspa8	15.637	NA	20.205
ENSMUSG00000024359	Hspa9	12.399	16.116	42.002
ENSMUSG00000025980	Hspd1	11.09	NA	17.883
ENSMUSG00000032115	Hyou1	NA	NA	14.857
ENSMUSG00000037851	Iars	NA	NA	11.446
ENSMUSG00000050002	Idnk	NA	NA	10.989
ENSMUSG00000001627	Ifrd1	NA	NA	14.601
ENSMUSG00000026185	Igfbp5	11.352	NA	NA
ENSMUSG00000013367	Iglon5	NA	NA	11.543
ENSMUSG00000024474	Ik	14.374	NA	NA
ENSMUSG00000001741	Il16	10.602	NA	25.825
ENSMUSG00000074695	Il22	18.212	20.946	24.006
ENSMUSG00000001016	Ilf2	11.507	NA	12.17
ENSMUSG00000090461	Iltifb	17.16	20.395	23.741
ENSMUSG00000027531	Impa1	NA	NA	13.347
ENSMUSG00000034336	Ina	NA	NA	20.054
ENSMUSG00000066232	Ipo7	16.667	16.007	16.717
ENSMUSG00000102422	Iqschfp	34.123	21.681	59.805
ENSMUSG00000034312	Iqsec1	10.626	NA	NA
ENSMUSG00000038894	Irs2	NA	NA	17.271
ENSMUSG00000025321	Itgb8	NA	NA	11.33
ENSMUSG00000030102	Itpr1	41.786	17.454	41.805
ENSMUSG00000028530	Jak1	NA	NA	11.83
ENSMUSG00000020737	Jpt1	NA	NA	10.384
ENSMUSG00000031948	Kars	NA	NA	12.756
ENSMUSG00000038909	Kat7	11.982	NA	13.13
ENSMUSG00000059486	Kbtbd2	13.723	NA	12.373
ENSMUSG00000043881	Kbtbd7	NA	NA	21.968
ENSMUSG00000028931	Kcnab2	NA	NA	11.306
ENSMUSG00000058975	Kcnc1	15.219	NA	NA
ENSMUSG00000060882	Kcnd2	12.37	NA	NA
ENSMUSG00000042529	Kcnj12	NA	NA	25.07
ENSMUSG00000026824	Kcnj3	NA	NA	52.851
ENSMUSG00000036760	Kcnk9	11.355	NA	NA
ENSMUSG00000036225	Kctd1	NA	NA	17.367
ENSMUSG00000030685	Kctd13	NA	NA	10.335
ENSMUSG00000016940	Kctd2	11.885	NA	NA
ENSMUSG00000037653	Kctd8	NA	NA	24.997
ENSMUSG00000036940	Kdm1a	22.393	NA	NA
ENSMUSG00000033326	Kdm4a	NA	NA	15.701
ENSMUSG00000042207	Kdm5b	13.392	NA	NA
ENSMUSG00000009905	Kdsr	NA	NA	12.431
ENSMUSG00000028790	Khdrbs1	12.372	NA	11.884
ENSMUSG00000036333	Kidins220	13.071	11.655	17.62
ENSMUSG00000014602	Kif1a	12.481	NA	15.797
ENSMUSG00000063077	Kif1b	31.708	NA	15.477
ENSMUSG00000022629	Kif21a	NA	NA	10.366
ENSMUSG00000021693	Kif2a	NA	NA	11.027
ENSMUSG00000018395	Kif3a	10.089	NA	NA
ENSMUSG00000006740	Kif5b	12.249	10.384	10.383
ENSMUSG00000036955	Kifbp	10.595	NA	NA
ENSMUSG00000032036	Kirrel3	14.808	10.46	16.572
ENSMUSG00000005672	Kit	54.271	15.651	33.725
ENSMUSG00000024862	Klc2	NA	NA	12.992
ENSMUSG00000033863	Klf9	13.353	NA	NA
ENSMUSG00000020978	Klhdc2	18.103	NA	11.604
ENSMUSG00000048732	Klhl11	13.443	NA	15.238
ENSMUSG00000022750	Klhl22	15.272	NA	NA
ENSMUSG00000066129	Kndc1	18.949	12.306	NA
ENSMUSG00000027782	Kpna4	12.113	NA	NA
ENSMUSG00000003731	Kpna6	NA	NA	13.379
ENSMUSG00000031391	L1cam	22.692	NA	NA
ENSMUSG00000052911	Lamb2	NA	NA	10.844
ENSMUSG00000016534	Lamp2	NA	NA	10.675
ENSMUSG00000062190	Lancl2	12.004	NA	NA
ENSMUSG00000024493	Lars	14.78	NA	NA
ENSMUSG00000057421	Las1l	NA	NA	12.257
ENSMUSG00000038366	Lasp1	NA	NA	14.812
ENSMUSG00000042487	Leo1	NA	NA	14.559
ENSMUSG00000050199	Lgr4	NA	NA	26.541
ENSMUSG00000029199	Lias	NA	NA	12.841
ENSMUSG00000019906	Lin7a	15.295	NA	13.128
ENSMUSG00000001143	Lman2l	16.263	NA	NA
ENSMUSG00000073725	Lmbrd1	NA	NA	20.656
ENSMUSG00000023845	Lnpep	11.967	NA	NA
ENSMUSG00000041168	Lonp1	20.78	NA	11.856
ENSMUSG00000022305	Lrp12	10.607	NA	NA
ENSMUSG00000029103	Lrpap1	NA	12.115	25.162
ENSMUSG00000024120	Lrpprc	13.05	NA	NA
ENSMUSG00000028703	Lrrc41	NA	NA	10.744
ENSMUSG00000007476	Lrrc8a	10.871	NA	NA
ENSMUSG00000026305	Lrrfip1	NA	NA	12.527
ENSMUSG00000034648	Lrrn1	11.409	NA	NA
ENSMUSG00000042846	Lrrtm3	NA	NA	20.405
ENSMUSG00000066568	Lsm14a	NA	16.529	NA
ENSMUSG00000044155	Lsm8	NA	NA	11.976
ENSMUSG00000063297	Luzp2	NA	NA	11.873
ENSMUSG00000032184	Lysmd2	NA	NA	10.446
ENSMUSG00000025245	Lztfl1	NA	NA	10.831
ENSMUSG00000025151	Maged1	NA	NA	11.097
ENSMUSG00000031227	Magee1	11.553	NA	NA
ENSMUSG00000027254	Map1a	14.193	NA	11.458
ENSMUSG00000052727	Map1b	33.444	21.612	23.994
ENSMUSG00000031812	Map1lc3b	11.156	NA	NA
ENSMUSG00000015222	Map2	17.196	23.899	28.25
ENSMUSG00000004936	Map2k1	NA	NA	16.881
ENSMUSG00000033352	Map2k4	13.11	NA	NA
ENSMUSG00000023050	Map3k12	NA	13.072	NA
ENSMUSG00000032479	Map4	NA	NA	13.266
ENSMUSG00000063358	Mapk1	12.966	NA	10.407
ENSMUSG00000046709	Mapk10	11.896	NA	31.077
ENSMUSG00000053436	Mapk14	NA	NA	12.937
ENSMUSG00000024277	Mapre2	28.21	24.474	48.227
ENSMUSG00000023307	Marchf5	NA	NA	14.753
ENSMUSG00000026977	Marchf7	NA	NA	10.687
ENSMUSG00000007411	Mark3	NA	NA	10.414
ENSMUSG00000040354	Mars1	17.459	NA	14.718
ENSMUSG00000042032	Mat2b	15.662	NA	12.822
ENSMUSG00000037236	Matr3	20.491	NA	18.934
ENSMUSG00000022139	Mbnl2	15.61	17	16.2
ENSMUSG00000041607	Mbp	54.885	43.791	45.831
ENSMUSG00000024150	Mcfd2	NA	NA	19.461
ENSMUSG00000038612	Mcl1	NA	NA	16.276
ENSMUSG00000020321	Mdh1	21.941	NA	18.071
ENSMUSG00000022109	Med4	NA	NA	11.248
ENSMUSG00000030557	Mef2a	NA	NA	21.712
ENSMUSG00000001419	Mef2d	NA	NA	25.299
ENSMUSG00000036466	Megf11	12.09	NA	NA
ENSMUSG00000036112	Metap2	NA	NA	10.358
ENSMUSG00000068479	Mfap1a	13.404	NA	NA
ENSMUSG00000048222	Mfap1b	13.404	NA	NA
ENSMUSG00000056050	Mia3	NA	10.396	18.607
ENSMUSG00000039478	Micu3	18.532	NA	12.415
ENSMUSG00000029922	Mkrn1	10.063	NA	NA
ENSMUSG00000030120	Mlf2	17.269	NA	16.029
ENSMUSG00000027612	Mmp24	NA	NA	11.927
ENSMUSG00000062270	Morf4l1	11.656	NA	14.237
ENSMUSG00000023861	Mpc1	NA	13.905	17.717
ENSMUSG00000052373	Mpp3	18.465	NA	12.374
ENSMUSG00000005417	Mprip	10.82	NA	11.946
ENSMUSG00000033845	Mrpl15	10.21	NA	NA
ENSMUSG00000018882	Mrpl45	NA	NA	11.382
ENSMUSG00000030612	Mrpl46	13.103	NA	NA
ENSMUSG00000058267	Mrps14	10.345	NA	NA
ENSMUSG00000031533	Mrps31	NA	NA	12.015
ENSMUSG00000040112	Mrps35	NA	NA	17.04
ENSMUSG00000061474	Mrps36	NA	NA	10.464
ENSMUSG00000069769	Msi2	15.347	10.404	12.553
ENSMUSG00000031604	Msmo1	12.136	NA	NA
ENSMUSG00000031762	Mt2	NA	NA	15.469
ENSMUSG00000021987	Mtmr6	NA	NA	10.423
ENSMUSG00000039431	Mtmr7	NA	NA	13.755
ENSMUSG00000028991	Mtor	NA	NA	18.588
ENSMUSG00000045636	Mtus1	NA	10.947	12.192
ENSMUSG00000020900	Myh10	11.889	NA	NA
ENSMUSG00000034593	Myo5a	NA	NA	14.639
ENSMUSG00000022671	Mzt2	NA	12.41	NA
ENSMUSG00000025402	Nab2	NA	NA	13.976
ENSMUSG00000014907	Naf1	NA	NA	41.021
ENSMUSG00000020572	Nampt	11.591	NA	NA
ENSMUSG00000058799	Nap1l1	NA	NA	10.29
ENSMUSG00000055733	Nap1l3	12.17	NA	NA
ENSMUSG00000006024	Napa	NA	NA	14.175
ENSMUSG00000024581	Napg	12.85	NA	NA
ENSMUSG00000024587	Nars	17.306	15.419	25.586
ENSMUSG00000028693	Nasp	NA	NA	22.193
ENSMUSG00000048142	Nat8l	NA	NA	11.442
ENSMUSG00000027799	Nbea	12.941	NA	NA
ENSMUSG00000051359	Ncald	10.369	NA	NA
ENSMUSG00000039542	Ncam1	28.282	18.773	35.477
ENSMUSG00000022762	Ncam2	13.615	NA	NA
ENSMUSG00000028833	Ncdn	16.827	23.682	19.604
ENSMUSG00000027698	Nceh1	NA	NA	17.287
ENSMUSG00000027002	Nckap1	10.74	NA	NA
ENSMUSG00000024425	Ndfip1	16.52	11.492	15.693
ENSMUSG00000053253	Ndfip2	NA	NA	16.52
ENSMUSG00000033585	Ndn	NA	NA	11.374
ENSMUSG00000027634	Ndrg3	NA	NA	17.976
ENSMUSG00000016427	Ndufa1	16.897	14.531	21.544
ENSMUSG00000035674	Ndufa3	14.888	NA	19.462
ENSMUSG00000029632	Ndufa4	12.642	NA	14.797
ENSMUSG00000030869	Ndufab1	10.019	NA	NA
ENSMUSG00000031059	Ndufb11	NA	NA	12.347
ENSMUSG00000022820	Ndufb4	NA	NA	13.763
ENSMUSG00000027673	Ndufb5	NA	10.392	13.872
ENSMUSG00000025204	Ndufb8	NA	NA	16.64
ENSMUSG00000022354	Ndufb9	11.185	13.644	13.339
ENSMUSG00000013593	Ndufs2	NA	NA	17.461
ENSMUSG00000024099	Ndufv2	11.991	NA	19.073
ENSMUSG00000032216	Nedd4	12.05	12.446	22.487
ENSMUSG00000016253	Nelfcd	NA	NA	13.267
ENSMUSG00000055409	Nell1	10.704	NA	NA
ENSMUSG00000034701	Neurod1	18.335	NA	16.684
ENSMUSG00000028565	Nfia	NA	NA	10.498
ENSMUSG00000008575	Nfib	10.425	NA	NA
ENSMUSG00000001911	Nfix	29.134	26.112	33.922
ENSMUSG00000027618	Nfs1	11.821	NA	NA
ENSMUSG00000021785	Ngly1	NA	NA	18.515
ENSMUSG00000047084	Ngrn	15.02	NA	NA
ENSMUSG00000026377	Nifk	NA	NA	17.449
ENSMUSG00000029432	Nipsnap2	NA	NA	16.572
ENSMUSG00000021910	Nisch	11.644	12.63	NA
ENSMUSG00000027787	Nmd3	10.512	NA	12.021
ENSMUSG00000042751	Nmnat2	10.828	NA	NA
ENSMUSG00000063200	Nol7	16.243	NA	10.857
ENSMUSG00000015176	Nolc1	NA	NA	10.003
ENSMUSG00000031311	Nono	NA	NA	10.397
ENSMUSG00000026020	Nop58	15.906	NA	10.04
ENSMUSG00000021775	Nr1d2	NA	NA	15.469
ENSMUSG00000005893	Nr2c2	NA	NA	10.123
ENSMUSG00000026826	Nr4a2	13.018	NA	NA
ENSMUSG00000042834	Nrep	12.387	NA	NA
ENSMUSG00000024109	Nrxn1	22.297	NA	28.795
ENSMUSG00000033768	Nrxn2	19.471	NA	13.877
ENSMUSG00000066392	Nrxn3	NA	NA	13.328
ENSMUSG00000034187	Nsf	10.539	NA	21.245
ENSMUSG00000029126	Nsg1	20.914	15.598	44.444
ENSMUSG00000040331	Nsmce4a	10.111	NA	NA
ENSMUSG00000059974	Ntm	10.348	NA	NA
ENSMUSG00000028954	Nub1	14.267	NA	13.77
ENSMUSG00000026434	Nucks1	11.31	NA	20.728
ENSMUSG00000024213	Nudt3	NA	NA	10.565
ENSMUSG00000029310	Nudt9	NA	NA	10.482
ENSMUSG00000066306	Numa1	11.677	NA	NA
ENSMUSG00000020844	Nxn	NA	NA	15.123
ENSMUSG00000042271	Nxt2	10.65	NA	NA
ENSMUSG00000030934	Oat	NA	NA	10.294
ENSMUSG00000035242	Oaz1	35.665	21.542	20.583
ENSMUSG00000029152	Ociad1	17.012	NA	NA
ENSMUSG00000033009	Ogfod1	NA	NA	15.861
ENSMUSG00000034160	Ogt	NA	NA	14.421
ENSMUSG00000027108	Ola1	NA	NA	13.722
ENSMUSG00000027965	Olfm3	11.233	NA	NA
ENSMUSG00000026761	Orc4	NA	NA	16.466
ENSMUSG00000040462	Os9	10.78	NA	NA
ENSMUSG00000024687	Osbp	11.049	NA	NA
ENSMUSG00000038280	Ostm1	10.031	NA	NA
ENSMUSG00000022307	Oxr1	15.724	NA	NA
ENSMUSG00000020745	Pafah1b1	14.828	30.712	20.359
ENSMUSG00000030774	Pak1	NA	NA	12.676
ENSMUSG00000028032	Papss1	NA	NA	11.575
ENSMUSG00000050505	Pcdh20	NA	NA	10.058
ENSMUSG00000055421	Pcdh9	NA	NA	15.629
ENSMUSG00000031592	Pcm1	NA	NA	16.873
ENSMUSG00000019795	Pcmt1	NA	NA	18.481
ENSMUSG00000029998	Pcyox1	NA	NA	23.501
ENSMUSG00000025137	Pcyt2	NA	NA	10.553
ENSMUSG00000038170	Pde4dip	16.072	NA	10.404
ENSMUSG00000031299	Pdha1	NA	NA	13.345
ENSMUSG00000010914	Pdhx	14.655	NA	11.007
ENSMUSG00000049225	Pdp1	NA	NA	14.855
ENSMUSG00000024122	Pdpk1	14.793	NA	NA
ENSMUSG00000022680	Pdxdc1	NA	NA	11.637
ENSMUSG00000013698	Pea15a	NA	NA	24.326
ENSMUSG00000002265	Peg3	12.855	NA	10.262
ENSMUSG00000024346	Pfdn1	11.608	NA	12.715
ENSMUSG00000033065	Pfkm	11.827	NA	NA
ENSMUSG00000027805	Pfn2	13.667	NA	19.362
ENSMUSG00000011752	Pgam1	17.144	NA	13.264
ENSMUSG00000008301	Phax	NA	NA	15.589
ENSMUSG00000023883	Phf10	10.043	NA	NA
ENSMUSG00000061360	Phf5a	11.711	NA	NA
ENSMUSG00000053398	Phgdh	NA	NA	16.637
ENSMUSG00000003469	Phyhip	23.36	12.595	NA
ENSMUSG00000025178	Pi4k2a	18.255	NA	17.914
ENSMUSG00000032405	Pias1	NA	NA	14.372
ENSMUSG00000039361	Picalm	15.845	10.216	NA
ENSMUSG00000017721	Pigt	10.191	NA	NA
ENSMUSG00000033628	Pik3c3	NA	NA	12.866
ENSMUSG00000027665	Pik3ca	NA	NA	15.599
ENSMUSG00000028698	Pik3r3	NA	10.003	12
ENSMUSG00000079480	Pin4	NA	NA	13.687
ENSMUSG00000034403	Pja1	14.908	NA	NA
ENSMUSG00000024083	Pja2	11.131	25.037	18.77
ENSMUSG00000039943	Plcb4	12.996	NA	NA
ENSMUSG00000031425	Plp1	NA	15.866	NA
ENSMUSG00000051373	Plpp7	NA	NA	24.036
ENSMUSG00000044667	Plppr4	13.523	NA	NA
ENSMUSG00000027998	Plrg1	NA	NA	10.617
ENSMUSG00000017417	Plxdc1	NA	NA	11.494
ENSMUSG00000026748	Plxdc2	NA	NA	10.08
ENSMUSG00000036606	Plxnb2	NA	NA	16.4
ENSMUSG00000026926	Pmpca	NA	NA	11
ENSMUSG00000029017	Pmpcb	NA	NA	11.175
ENSMUSG00000028248	Pnisr	14.492	NA	NA
ENSMUSG00000026179	Pnkd	12.357	NA	21.367
ENSMUSG00000020994	Pnn	NA	NA	11.795
ENSMUSG00000036257	Pnpla8	14.007	14.426	11.878
ENSMUSG00000041815	Poldip3	14.594	NA	NA
ENSMUSG00000005198	Polr2a	NA	NA	10.895
ENSMUSG00000031783	Polr2c	NA	NA	13.172
ENSMUSG00000045996	Polr2k	10.409	NA	NA
ENSMUSG00000032199	Polr2m	NA	NA	11.613
ENSMUSG00000029649	Pomp	NA	NA	10.431
ENSMUSG00000020525	Ppm1d	13.626	NA	NA
ENSMUSG00000040385	Ppp1ca	11.869	NA	NA
ENSMUSG00000004455	Ppp1cc	12.124	21.465	15.655
ENSMUSG00000046062	Ppp1r15b	NA	NA	14.899
ENSMUSG00000029725	Ppp1r35	NA	NA	11.665
ENSMUSG00000028882	Ppp1r8	14.725	NA	NA
ENSMUSG00000020349	Ppp2ca	NA	NA	13.396
ENSMUSG00000007564	Ppp2r1a	NA	NA	13.124
ENSMUSG00000041769	Ppp2r2d	NA	NA	16.668
ENSMUSG00000021022	Ppp2r3c	NA	NA	13.149
ENSMUSG00000059409	Ppp2r5d	11.912	NA	NA
ENSMUSG00000028161	Ppp3ca	13.928	17.989	27.83
ENSMUSG00000033953	Ppp3r1	11.328	NA	33.571
ENSMUSG00000052144	Ppp4r2	12.979	NA	10.565
ENSMUSG00000021209	Ppp4r4	NA	NA	11.982
ENSMUSG00000003099	Ppp5c	17.495	NA	15.297
ENSMUSG00000026753	Ppp6c	10.981	NA	NA
ENSMUSG00000024908	Ppp6r3	15.001	NA	NA
ENSMUSG00000038582	Pptc7	NA	NA	17.278
ENSMUSG00000031157	Pqbp1	NA	10.733	16.623
ENSMUSG00000004895	Prcc	30.366	NA	NA
ENSMUSG00000035456	Prdm8	NA	NA	21.128
ENSMUSG00000024127	Prepl	17.436	14.97	34.706
ENSMUSG00000005034	Prkacb	NA	NA	13.317
ENSMUSG00000025855	Prkar1b	10.649	11.706	60.569
ENSMUSG00000052889	Prkcb	10.809	NA	NA
ENSMUSG00000037643	Prkci	12.336	NA	13.653
ENSMUSG00000039449	Prpf18	12.618	NA	NA
ENSMUSG00000027881	Prpf38b	10.596	NA	15.749
ENSMUSG00000015711	Prune1	NA	NA	17.265
ENSMUSG00000039126	Prune2	NA	NA	15.121
ENSMUSG00000030465	Psd3	11.818	NA	NA
ENSMUSG00000028484	Psip1	12.896	NA	NA
ENSMUSG00000030751	Psma1	NA	NA	12.095
ENSMUSG00000015671	Psma2	12.544	NA	16.02
ENSMUSG00000060073	Psma3	11.664	12.165	NA
ENSMUSG00000068749	Psma5	NA	NA	14.17
ENSMUSG00000021024	Psma6	10.604	14.926	NA
ENSMUSG00000021178	Psmc1	16.483	NA	17.864
ENSMUSG00000002102	Psmc3	20.214	12.036	30.696
ENSMUSG00000021832	Psmc6	NA	NA	17.052
ENSMUSG00000026229	Psmd1	10.859	NA	18.884
ENSMUSG00000025487	Psmd13	NA	10.059	11.826
ENSMUSG00000026914	Psmd14	11.24	NA	20.079
ENSMUSG00000006998	Psmd2	21.575	24.269	NA
ENSMUSG00000026869	Psmd5	14.161	NA	NA
ENSMUSG00000029440	Psmd9	NA	NA	11.196
ENSMUSG00000022913	Psmg1	NA	NA	12.837
ENSMUSG00000026238	Ptma	NA	12.091	NA
ENSMUSG00000030122	Ptms	12.356	NA	15.923
ENSMUSG00000038502	Ptov1	NA	NA	13.461
ENSMUSG00000026064	Ptp4a1	NA	NA	12.186
ENSMUSG00000117310	Ptp4a1	NA	NA	12.186
ENSMUSG00000043733	Ptpn11	NA	NA	13.878
ENSMUSG00000056553	Ptprn2	12.541	NA	NA
ENSMUSG00000020151	Ptprr	11.292	NA	NA
ENSMUSG00000013236	Ptprs	11.761	NA	NA
ENSMUSG00000002524	Puf60	NA	NA	11.954
ENSMUSG00000028580	Pum1	11.218	NA	12.211
ENSMUSG00000005716	Pvalb	NA	NA	18.522
ENSMUSG00000077450	Rab11b	NA	NA	10.08
ENSMUSG00000073639	Rab18	NA	NA	11.363
ENSMUSG00000020132	Rab21	NA	11.883	15.75
ENSMUSG00000030643	Rab30	NA	NA	10.123
ENSMUSG00000021700	Rab3c	16.641	33.759	NA
ENSMUSG00000030704	Rab6a	13.171	NA	22.715
ENSMUSG00000079477	Rab7	10.067	NA	12.063
ENSMUSG00000038975	Rabggtb	NA	NA	13.39
ENSMUSG00000001847	Rac1	11.154	NA	18.942
ENSMUSG00000020372	Rack1	NA	NA	10.387
ENSMUSG00000003813	Rad23a	NA	NA	11.908
ENSMUSG00000029430	Ran	11.405	NA	NA
ENSMUSG00000018848	Rars	NA	NA	16.008
ENSMUSG00000031453	Rasa3	10.639	NA	NA
ENSMUSG00000032356	Rasgrf1	11.368	NA	NA
ENSMUSG00000025907	Rb1cc1	NA	NA	11.826
ENSMUSG00000031353	Rbbp7	NA	NA	10.266
ENSMUSG00000033565	Rbfox2	NA	NA	11.108
ENSMUSG00000025576	Rbfox3	18.03	NA	NA
ENSMUSG00000078784	Rbis	10.156	NA	NA
ENSMUSG00000010608	Rbm25	15.512	NA	12.102
ENSMUSG00000031167	Rbm3	NA	15.111	13.092
ENSMUSG00000027620	Rbm39	10.761	NA	12.351
ENSMUSG00000036733	Rbm42	11.884	NA	18.42
ENSMUSG00000031134	Rbmx	10.607	NA	NA
ENSMUSG00000037070	Rbmxl1	10.95	NA	NA
ENSMUSG00000022400	Rbx1	10.658	NA	NA
ENSMUSG00000040945	Rcc2	12.639	NA	26.904
ENSMUSG00000035504	Reep6	NA	NA	13.219
ENSMUSG00000042453	Reln	22.434	NA	22.114
ENSMUSG00000040855	Reps2	NA	NA	10.997
ENSMUSG00000017802	Retreg3	NA	NA	10.85
ENSMUSG00000024712	Rfk	NA	11.603	NA
ENSMUSG00000048027	Rgmb	NA	NA	13.88
ENSMUSG00000019775	Rgs17	NA	NA	12.378
ENSMUSG00000007815	Rhoa	NA	NA	17.138
ENSMUSG00000017686	Rhot1	11.883	NA	15.071
ENSMUSG00000057455	Rit2	NA	NA	12.009
ENSMUSG00000028557	Rnf11	11.276	NA	19.976
ENSMUSG00000010086	Rnf112	15.982	NA	10.749
ENSMUSG00000028098	Rnf115	NA	NA	10.227
ENSMUSG00000036503	Rnf13	12.292	10.923	NA
ENSMUSG00000038876	Rnf146	12.497	NA	10.205
ENSMUSG00000052949	Rnf157	NA	NA	13.212
ENSMUSG00000040746	Rnf167	NA	NA	12.851
ENSMUSG00000055850	Rnf181	17.281	NA	16.081
ENSMUSG00000026484	Rnf2	12.176	NA	NA
ENSMUSG00000028677	Rnf220	NA	NA	10.607
ENSMUSG00000034681	Rnps1	10.604	NA	NA
ENSMUSG00000020580	Rock2	14.427	NA	12.006
ENSMUSG00000022540	Rogdi	15.34	NA	10.475
ENSMUSG00000028187	Rpf1	NA	NA	15.354
ENSMUSG00000029608	Rph3a	14.702	10.268	13.747
ENSMUSG00000025794	Rpl14	10.409	NA	NA
ENSMUSG00000012405	Rpl15	11.093	NA	NA
ENSMUSG00000059070	Rpl18	13.442	NA	11
ENSMUSG00000071415	Rpl23	12.372	NA	14.04
ENSMUSG00000098274	Rpl24	59.172	29.357	50.406
ENSMUSG00000046364	Rpl27a	10.89	16.367	NA
ENSMUSG00000057841	Rpl32	NA	NA	13.074
ENSMUSG00000062006	Rpl34	NA	NA	16.448
ENSMUSG00000057863	Rpl36	17.857	NA	21.128
ENSMUSG00000060377	Rpl36a-ps1	NA	NA	12.661
ENSMUSG00000041841	Rpl37	NA	NA	10.267
ENSMUSG00000046330	Rpl37a	NA	10.481	11.255
ENSMUSG00000032399	Rpl4	14.301	NA	11.199
ENSMUSG00000093674	Rpl41	50.093	32.356	57.221
ENSMUSG00000029614	Rpl6	NA	NA	10.602
ENSMUSG00000062647	Rpl7a	18.037	34.544	55.469
ENSMUSG00000003970	Rpl8	15.906	10.885	20.807
ENSMUSG00000030062	Rpn1	14.032	NA	NA
ENSMUSG00000024446	Rpp21	NA	NA	11.175
ENSMUSG00000090862	Rps13	14.367	NA	NA
ENSMUSG00000024608	Rps14	NA	NA	15.619
ENSMUSG00000063457	Rps15	21.198	NA	17.895
ENSMUSG00000069117	Rps18-ps6	10.415	NA	NA
ENSMUSG00000040952	Rps19	NA	NA	14.105
ENSMUSG00000049517	Rps23	NA	14.579	NA
ENSMUSG00000025290	Rps24	12.607	NA	13.839
ENSMUSG00000009927	Rps25	10.006	NA	12.058
ENSMUSG00000036781	Rps27l	NA	NA	12.309
ENSMUSG00000030744	Rps3	11.333	NA	11.509
ENSMUSG00000028081	Rps3a1	16.89	NA	10.535
ENSMUSG00000031320	Rps4x	22.949	14.748	25.265
ENSMUSG00000028495	Rps6	13.571	11.871	25.901
ENSMUSG00000003644	Rps6ka1	10.558	NA	10.315
ENSMUSG00000061477	Rps7	NA	13	10.735
ENSMUSG00000006333	Rps9	13.729	NA	NA
ENSMUSG00000022682	Rrn3	13.472	NA	NA
ENSMUSG00000061032	Rrp1	NA	NA	12.38
ENSMUSG00000000339	Rtca	NA	10.711	NA
ENSMUSG00000027502	Rtf2	15.011	NA	NA
ENSMUSG00000024758	Rtn3	NA	NA	18.162
ENSMUSG00000020458	Rtn4	10.001	NA	NA
ENSMUSG00000029291	Rufy3	10.094	NA	NA
ENSMUSG00000035969	Rusc2	13.319	NA	19.714
ENSMUSG00000030079	Ruvbl1	NA	NA	12.585
ENSMUSG00000025240	Sacm1l	16.084	NA	10.122
ENSMUSG00000052833	Sae1	11.58	NA	NA
ENSMUSG00000021963	Sap18	NA	NA	13.079
ENSMUSG00000061104	Sap18b	NA	NA	13.079
ENSMUSG00000020755	Sap30bp	NA	10.891	NA
ENSMUSG00000031532	Saraf	NA	NA	16.318
ENSMUSG00000036529	Sbf1	18.532	NA	NA
ENSMUSG00000021687	Scamp1	12.097	NA	21.443
ENSMUSG00000027777	Schip1	38.584	19.422	60.777
ENSMUSG00000075318	Scn2a	24.864	NA	46.519
ENSMUSG00000092607	Scnm1	NA	NA	12.648
ENSMUSG00000021577	Sdha	14.64	NA	NA
ENSMUSG00000009863	Sdhb	NA	NA	10.674
ENSMUSG00000000171	Sdhd	NA	NA	10.198
ENSMUSG00000025724	Sec11a	NA	NA	12.137
ENSMUSG00000035093	Secisbp2l	NA	11.058	12.757
ENSMUSG00000079614	Seh1l	11.037	NA	10.078
ENSMUSG00000075701	Selenos	NA	NA	11.777
ENSMUSG00000022855	Senp2	10.612	NA	NA
ENSMUSG00000036371	Serbp1	NA	NA	13.251
ENSMUSG00000019877	Serinc1	15.433	NA	11.768
ENSMUSG00000028893	Sesn2	NA	NA	14.01
ENSMUSG00000042272	Sestd1	NA	NA	12.045
ENSMUSG00000056770	Setd3	NA	10.027	NA
ENSMUSG00000000632	Sez6	13.572	NA	NA
ENSMUSG00000030683	Sez6l2	12.276	NA	24.646
ENSMUSG00000024949	Sf1	12.919	NA	NA
ENSMUSG00000002129	Sf3a1	NA	NA	15.665
ENSMUSG00000020211	Sf3a2	NA	NA	18.424
ENSMUSG00000025982	Sf3b1	15.453	NA	11.482
ENSMUSG00000033732	Sf3b3	11.496	NA	22.611
ENSMUSG00000068856	Sf3b4	NA	NA	11.885
ENSMUSG00000037361	Sf3b6	NA	NA	18.866
ENSMUSG00000021474	Sfxn1	NA	NA	12.734
ENSMUSG00000032908	Sgpp2	NA	NA	10.334
ENSMUSG00000026860	Sh3glb2	12.678	NA	NA
ENSMUSG00000037541	Shank2	NA	NA	11.135
ENSMUSG00000025403	Shmt2	13.601	NA	14.453
ENSMUSG00000036432	Siah2	NA	NA	34.255
ENSMUSG00000037902	Sirpa	13.142	NA	11.459
ENSMUSG00000022372	Sla	NA	NA	17.612
ENSMUSG00000024597	Slc12a2	NA	NA	13.405
ENSMUSG00000005360	Slc1a3	12.064	NA	12.707
ENSMUSG00000020142	Slc1a4	NA	NA	24.274
ENSMUSG00000037996	Slc24a2	11.196	NA	10.797
ENSMUSG00000027010	Slc25a12	10.462	18.59	12.447
ENSMUSG00000019082	Slc25a22	20.207	NA	10.209
ENSMUSG00000061904	Slc25a3	19.045	10.044	24.248
ENSMUSG00000003153	Slc2a3	NA	NA	12.314
ENSMUSG00000070287	Slc35g2	NA	11.877	NA
ENSMUSG00000081534	Slc48a1	10.374	NA	NA
ENSMUSG00000022848	Slc49a4	14.935	NA	NA
ENSMUSG00000026904	Slc4a10	NA	12.567	NA
ENSMUSG00000060961	Slc4a4	NA	NA	11.432
ENSMUSG00000031596	Slc7a2	NA	NA	11.9
ENSMUSG00000031297	Slc7a3	12.928	NA	23.333
ENSMUSG00000022180	Slc7a8	22.93	NA	20.53
ENSMUSG00000054640	Slc8a1	11.103	NA	NA
ENSMUSG00000060681	Slc9a6	11.756	NA	NA
ENSMUSG00000020409	Slu7	10.272	NA	NA
ENSMUSG00000031681	Smad1	NA	NA	17.144
ENSMUSG00000024921	Smarca2	16.871	NA	23.94
ENSMUSG00000032187	Smarca4	NA	NA	10.206
ENSMUSG00000031715	Smarca5	10.373	NA	13.555
ENSMUSG00000037935	Smarce1	NA	NA	13.185
ENSMUSG00000024974	Smc3	18.424	NA	14.813
ENSMUSG00000009894	Snap47	10.972	NA	13.294
ENSMUSG00000021113	Snapc1	NA	NA	11.094
ENSMUSG00000003660	Snrnp200	12.264	NA	13.892
ENSMUSG00000001158	Snrnp27	NA	NA	19.968
ENSMUSG00000074088	Snrnp40	NA	NA	13.006
ENSMUSG00000063511	Snrnp70	NA	14.74	16.826
ENSMUSG00000024217	Snrpc	NA	10.367	17.268
ENSMUSG00000002477	Snrpd1	15.701	16.028	15.47
ENSMUSG00000057278	Snrpg	NA	NA	13.566
ENSMUSG00000102252	Snrpn	18.27	NA	16.631
ENSMUSG00000063480	Snu13	NA	NA	15.236
ENSMUSG00000021039	Snw1	10.55	NA	10.308
ENSMUSG00000038301	Snx10	22.417	NA	NA
ENSMUSG00000019804	Snx3	10.49	NA	NA
ENSMUSG00000056185	Snx32	12.629	NA	NA
ENSMUSG00000006818	Sod2	12.309	NA	NA
ENSMUSG00000055485	Soga1	13.16	NA	NA
ENSMUSG00000038916	Soga3	NA	NA	13.079
ENSMUSG00000022961	Son	16.353	18.589	18.058
ENSMUSG00000046470	Sox18	NA	NA	11.725
ENSMUSG00000027109	Sp3	NA	NA	16.318
ENSMUSG00000020859	Spag9	15.274	NA	NA
ENSMUSG00000029309	Sparcl1	12.687	15.496	19.63
ENSMUSG00000054408	Spcs3	12.65	NA	NA
ENSMUSG00000026163	Sphkap	12.209	11.857	16.119
ENSMUSG00000056222	Spock1	11.87	NA	13.979
ENSMUSG00000054162	Spock3	NA	NA	12.752
ENSMUSG00000035206	Sppl2b	10	NA	NA
ENSMUSG00000027351	Spred1	10.753	NA	NA
ENSMUSG00000036966	Spryd3	NA	11.232	NA
ENSMUSG00000024160	Spsb3	NA	NA	15.058
ENSMUSG00000057738	Sptan1	22.257	15.081	25.757
ENSMUSG00000020315	Sptbn1	15.567	13.807	21.122
ENSMUSG00000026425	Srgap2	17.133	10.686	NA
ENSMUSG00000073079	Srp54a	12.144	NA	NA
ENSMUSG00000020780	Srp68	NA	NA	11.901
ENSMUSG00000026511	Srp9	NA	NA	10.429
ENSMUSG00000039218	Srrm2	12.493	NA	15.262
ENSMUSG00000055436	Srsf11	13.859	NA	11.699
ENSMUSG00000071172	Srsf3	NA	NA	17.687
ENSMUSG00000078134	Srsf3-ps	NA	NA	19.657
ENSMUSG00000021134	Srsf5	NA	NA	10.356
ENSMUSG00000016921	Srsf6	NA	NA	11.419
ENSMUSG00000068882	Ssb	11.913	13.45	17.779
ENSMUSG00000003992	Ssbp2	10.692	NA	10.447
ENSMUSG00000036825	Ssx2ip	NA	NA	16.263
ENSMUSG00000022403	St13	NA	NA	10.96
ENSMUSG00000056091	St3gal5	22.939	14.333	12.104
ENSMUSG00000045576	St7l	NA	NA	18.965
ENSMUSG00000025862	Stag2	NA	NA	13.153
ENSMUSG00000024966	Stip1	14.784	NA	NA
ENSMUSG00000063410	Stk24	15.342	NA	NA
ENSMUSG00000028455	Stoml2	NA	NA	11
ENSMUSG00000014601	Strip1	14.547	NA	21.745
ENSMUSG00000032437	Stt3b	16.406	NA	11.373
ENSMUSG00000022205	Sub1	14.079	23.424	11.953
ENSMUSG00000052738	Suclg1	10.802	30.253	26.439
ENSMUSG00000002052	Supt6	18.022	NA	NA
ENSMUSG00000053025	Sv2b	10.097	NA	10.863
ENSMUSG00000022340	Sybu	13.207	NA	14.149
ENSMUSG00000009394	Syn2	16.569	NA	14.888
ENSMUSG00000032423	Syncrip	17.321	NA	16.824
ENSMUSG00000096054	Syne1	NA	22.752	NA
ENSMUSG00000022973	Synj1	NA	10.661	NA
ENSMUSG00000031144	Syp	38.075	12.672	12.627
ENSMUSG00000068923	Syt11	NA	12.72	11.369
ENSMUSG00000026452	Syt2	NA	10.299	16.977
ENSMUSG00000022658	Tagln3	10.825	NA	NA
ENSMUSG00000022241	Tars	10.136	NA	NA
ENSMUSG00000004535	Tax1bp1	NA	NA	16.547
ENSMUSG00000020130	Tbc1d15	NA	NA	17.762
ENSMUSG00000039178	Tbc1d19	NA	NA	11.195
ENSMUSG00000031709	Tbc1d9	NA	NA	12.007
ENSMUSG00000037287	Tbcel	NA	NA	11.857
ENSMUSG00000011114	Tbrg1	11.876	NA	NA
ENSMUSG00000036667	Tcaf1	11.765	NA	NA
ENSMUSG00000044550	Tceal3	20.571	27.288	46.337
ENSMUSG00000054034	Tceal5	24.062	29.255	50.602
ENSMUSG00000031409	Tceal6	22.255	29.643	48.089
ENSMUSG00000001472	Tcf25	NA	NA	10.733
ENSMUSG00000068039	Tcp1	11.232	NA	16.515
ENSMUSG00000027175	Tcp11l1	NA	NA	11.666
ENSMUSG00000020034	Tcp11l2	NA	NA	10.143
ENSMUSG00000034674	Tdg	12.965	NA	NA
ENSMUSG00000031708	Tecr	12.25	NA	21.245
ENSMUSG00000029345	Tfip11	NA	NA	11.871
ENSMUSG00000039239	Tgfb2	NA	NA	10.408
ENSMUSG00000032625	Thsd7a	NA	NA	13.552
ENSMUSG00000032011	Thy1	28.566	23.688	30.767
ENSMUSG00000035443	Thyn1	12.289	NA	NA
ENSMUSG00000002949	Timm44	NA	NA	13.855
ENSMUSG00000021079	Timm9	NA	NA	11.018
ENSMUSG00000017466	Timp2	NA	NA	10.428
ENSMUSG00000025544	Tm9sf2	NA	NA	17.237
ENSMUSG00000029390	Tmed2	NA	NA	11.235
ENSMUSG00000020921	Tmem101	NA	11.344	NA
ENSMUSG00000029571	Tmem106b	NA	NA	18.21
ENSMUSG00000024736	Tmem132a	15.356	12.235	10.594
ENSMUSG00000024245	Tmem178	18.523	NA	NA
ENSMUSG00000051232	Tmem199	NA	13.332	NA
ENSMUSG00000053094	Tmem248	NA	NA	15.518
ENSMUSG00000033578	Tmem35a	12.688	NA	NA
ENSMUSG00000045435	Tmem60	NA	NA	11.301
ENSMUSG00000054484	Tmem62	NA	NA	12.66
ENSMUSG00000036026	Tmem63b	12.596	NA	NA
ENSMUSG00000033808	Tmem87a	NA	NA	10.378
ENSMUSG00000030059	Tmf1	12.621	NA	NA
ENSMUSG00000032186	Tmod2	13.879	NA	NA
ENSMUSG00000034757	Tmub2	NA	NA	15.343
ENSMUSG00000021072	Tmx1	NA	NA	11.517
ENSMUSG00000024614	Tmx3	NA	NA	21.254
ENSMUSG00000034723	Tmx4	NA	11.019	12.896
ENSMUSG00000023905	Tnfrsf12a	NA	12.224	16.326
ENSMUSG00000009470	Tnpo1	17.457	NA	18.002
ENSMUSG00000037573	Tob1	21.123	19.791	11.885
ENSMUSG00000022752	Tomm70a	12.447	NA	13.291
ENSMUSG00000070544	Top1	NA	NA	10.291
ENSMUSG00000023456	Tpi1	14.203	13.817	15.579
ENSMUSG00000032366	Tpm1	36.355	NA	12.918
ENSMUSG00000041763	Tpp2	10.376	NA	17.372
ENSMUSG00000006005	Tpr	NA	NA	18.619
ENSMUSG00000048707	Tprn	NA	12.821	19.598
ENSMUSG00000029817	Tra2a	NA	NA	19.268
ENSMUSG00000022858	Tra2b	12.233	NA	14.88
ENSMUSG00000042726	Trafd1	11.018	NA	NA
ENSMUSG00000079317	Trappc2	NA	NA	14.064
ENSMUSG00000032112	Trappc4	NA	NA	12.476
ENSMUSG00000032554	Trf	NA	11.174	15.252
ENSMUSG00000021712	Trim23	10.396	NA	NA
ENSMUSG00000036989	Trim3	NA	NA	11.926
ENSMUSG00000018548	Trim37	10.629	NA	NA
ENSMUSG00000027189	Trim44	NA	10.194	NA
ENSMUSG00000013736	Trnt1	NA	NA	12.01
ENSMUSG00000027716	Trpc3	12.229	NA	18.723
ENSMUSG00000052387	Trpm3	NA	NA	10.792
ENSMUSG00000022010	Tsc22d1	NA	NA	16.886
ENSMUSG00000056820	Tsnax	NA	NA	17.114
ENSMUSG00000032324	Tspan3	15.97	12.07	30.283
ENSMUSG00000030352	Tspan9	NA	NA	13.334
ENSMUSG00000039485	Tspyl4	13.894	10.889	15.216
ENSMUSG00000041278	Ttc1	NA	NA	11.759
ENSMUSG00000040785	Ttc3	NA	NA	17.035
ENSMUSG00000022151	Ttc33	NA	NA	22.344
ENSMUSG00000072235	Tuba1a	14.493	NA	15.442
ENSMUSG00000023004	Tuba1b	14.282	NA	NA
ENSMUSG00000043091	Tuba1c	13.932	11.074	NA
ENSMUSG00000026202	Tuba4a	13.104	NA	14.275
ENSMUSG00000005354	Txn2	11.136	NA	NA
ENSMUSG00000061613	U2af1	NA	NA	11.913
ENSMUSG00000001924	Uba1	12.023	NA	NA
ENSMUSG00000052997	Uba2	NA	NA	15.726
ENSMUSG00000036352	Ubac1	NA	NA	10.148
ENSMUSG00000050628	Ubald2	NA	NA	10.144
ENSMUSG00000019505	Ubb	41.426	12.816	25.255
ENSMUSG00000008348	Ubc	44.567	36.146	32.925
ENSMUSG00000016308	Ube2a	NA	NA	12.682
ENSMUSG00000058317	Ube2e2	10.198	NA	NA
ENSMUSG00000027011	Ube2e3	19.956	NA	14.183
ENSMUSG00000020794	Ube2g1	12.317	NA	NA
ENSMUSG00000015120	Ube2i	11.949	NA	16.29
ENSMUSG00000005575	Ube2m	NA	NA	10.921
ENSMUSG00000020802	Ube2o	11.053	NA	11.075
ENSMUSG00000078923	Ube2v1	NA	10.277	NA
ENSMUSG00000039000	Ube3c	10.38	NA	NA
ENSMUSG00000059890	Ube4a	NA	NA	19.786
ENSMUSG00000028960	Ube4b	15.937	12.533	38.948
ENSMUSG00000005312	Ubqln1	NA	NA	24.791
ENSMUSG00000008604	Ubqln4	NA	NA	10.848
ENSMUSG00000020634	Ubxn2a	NA	NA	10.177
ENSMUSG00000026353	Ubxn4	11.007	11.676	NA
ENSMUSG00000052906	Ubxn8	NA	NA	10.217
ENSMUSG00000022111	Uchl3	NA	11.657	11.028
ENSMUSG00000031634	Ufsp2	NA	NA	10.505
ENSMUSG00000026667	Uhmk1	10.344	10.221	11.046
ENSMUSG00000034799	Unc13a	11.663	NA	NA
ENSMUSG00000058301	Upf1	10.433	NA	17.399
ENSMUSG00000020163	Uqcr11	10	14.24	16.777
ENSMUSG00000021520	Uqcrb	13.491	11.225	22.94
ENSMUSG00000025651	Uqcrc1	13.599	NA	NA
ENSMUSG00000038462	Uqcrfs1	NA	NA	15.829
ENSMUSG00000063882	Uqcrh	NA	NA	13.851
ENSMUSG00000029407	Uso1	10.728	NA	15.83
ENSMUSG00000047879	Usp14	11.249	NA	NA
ENSMUSG00000020124	Usp15	10.621	NA	NA
ENSMUSG00000006676	Usp19	NA	NA	13.238
ENSMUSG00000032010	Usp2	NA	NA	12.008
ENSMUSG00000025437	Usp33	10.893	NA	10.928
ENSMUSG00000059263	Usp47	NA	NA	13.419
ENSMUSG00000022710	Usp7	NA	NA	10.144
ENSMUSG00000027363	Usp8	NA	NA	17.125
ENSMUSG00000031010	Usp9x	12.77	NA	NA
ENSMUSG00000024091	Vapa	NA	NA	12.06
ENSMUSG00000046844	Vat1l	NA	NA	14.113
ENSMUSG00000028452	Vcp	13.271	NA	11.608
ENSMUSG00000045210	Vcpip1	NA	NA	24.85
ENSMUSG00000008892	Vdac3	13.98	NA	22.365
ENSMUSG00000073131	Vma21	NA	NA	10.337
ENSMUSG00000031696	Vps35	NA	NA	15.079
ENSMUSG00000030982	Vps35l	NA	NA	11.726
ENSMUSG00000001376	Vps50	NA	NA	11.437
ENSMUSG00000048834	Vstm2a	NA	NA	11.361
ENSMUSG00000021124	Vti1b	17.555	NA	NA
ENSMUSG00000019831	Wasf1	NA	NA	12.035
ENSMUSG00000029684	Wasl	14.915	NA	NA
ENSMUSG00000030216	Wbp11	NA	NA	11.663
ENSMUSG00000022023	Wbp4	10.584	NA	NA
ENSMUSG00000024400	Wdr33	14.879	NA	NA
ENSMUSG00000025173	Wdr45b	10.697	NA	NA
ENSMUSG00000032512	Wdr48	NA	NA	10.324
ENSMUSG00000020257	Wdr82	15.645	NA	NA
ENSMUSG00000020811	Wscd1	NA	NA	10.582
ENSMUSG00000020290	Xpo1	17.66	NA	NA
ENSMUSG00000067150	Xpo5	NA	NA	11.755
ENSMUSG00000034667	Xpot	NA	NA	12.321
ENSMUSG00000028811	Yars	15.272	NA	13.13
ENSMUSG00000030189	Ybx3	NA	NA	10.049
ENSMUSG00000071074	Yipf3	NA	NA	12.356
ENSMUSG00000024072	Yipf4	NA	NA	11.125
ENSMUSG00000026775	Yme1l1	NA	NA	15.953
ENSMUSG00000035851	Ythdc1	NA	NA	20.956
ENSMUSG00000020849	Ywhae	36.225	27.875	36.194
ENSMUSG00000022285	Ywhaz	28.506	NA	17.891
ENSMUSG00000034173	Zbed5	14.173	NA	22.494
ENSMUSG00000063659	Zbtb18	14.234	10.313	26.942
ENSMUSG00000035011	Zbtb7a	NA	NA	12.086
ENSMUSG00000043542	Zc2hc1a	11.353	12.326	NA
ENSMUSG00000031428	Zcchc18	10.044	NA	NA
ENSMUSG00000034265	Zdhhc14	NA	NA	13.729
ENSMUSG00000035798	Zdhhc17	NA	11.249	NA
ENSMUSG00000039686	Zer1	NA	NA	14.085
ENSMUSG00000030629	Zfand6	16.327	NA	16.499
ENSMUSG00000017421	Zfp207	11.341	NA	12.146
ENSMUSG00000000552	Zfp385a	NA	NA	11.887
ENSMUSG00000024298	Zfp871	NA	NA	15.346
ENSMUSG00000022201	Zfr	17.907	NA	10.403
ENSMUSG00000032368	Zic1	14.302	NA	NA
ENSMUSG00000007817	Zmiz1	NA	NA	10.177
ENSMUSG00000043207	Zmpste24	11.276	NA	NA
ENSMUSG00000021945	Zmym2	NA	NA	20.298
ENSMUSG00000059518	Znhit1	11.909	NA	NA
ENSMUSG00000030967	Zranb1	NA	NA	12.407
ENSMUSG00000028180	Zranb2	11.567	NA	NA
ENSMUSG00000022228	Zscan26	NA	NA	12.391
ENSMUSG00000034636	Zyg11b	NA	14.098	NA
