# Supplementary material for: GTPBP1 resolves paused ribosomes to maintain neuronal homeostasis
Source: eLife. 2020 Nov 13;9:e62731. doi: 10.7554/eLife.62731 (PMC7665888; doi:10.7554/eLife.62731)
Supplement: Supplementary file 2. [file elife-62731-supp2.xlsx]

## Sheet: B6J_vs_Gtpbp1 DE gene
target_id	ext_gene	pval	qval	b	se_b	mean_obs	var_obs	tech_var	sigma_sq	smooth_sigma_sq	final_sigma_sq	J_BP1_1	J_BP1_2	J_BP1_3	wtJ_1	wtJ_2	wtJ_3
ENSMUSG00000031297	Slc7a3	1.12685e-156	2.72417e-152	3.33441	0.125037	7.10488	3.35424	0.0019498	0.0215016	0.00767021	0.0215016	110.805	125.537	136.717	4.52874	5.10234	3.55325
ENSMUSG00000028893	Sesn2	3.63104e-111	4.38902e-107	2.08861	0.0932266	7.83688	1.31912	0.000580974	0.0124558	0.00581794	0.0124558	67.1486	68.7568	82.8714	9.18352	9.82054	7.85553
ENSMUSG00000027313	Chac1	4.02202e-99	3.24108e-95	2.08949	0.0988769	6.27176	1.3163	0.00237335	0.00576518	0.0122916	0.0122916	32.4112	32.8003	40.3419	4.25851	4.3059	4.1157
ENSMUSG00000002100	Mybpc3	2.08998e-96	1.26313e-92	-1.29259	0.0620396	8.29564	0.505854	0.00035405	0.00541931	0.00523065	0.00541931	18.4177	18.4699	17.5383	58.6165	69.6383	69.7369
ENSMUSG00000025403	Shmt2	4.97305e-92	2.40447e-88	1.55465	0.0764082	6.98443	0.726102	0.000623804	0.000653568	0.00813352	0.00813352	168.868	172.492	171.134	32.9326	36.1908	33.0272
ENSMUSG00000029752	Asns	2.86325e-91	1.15365e-87	1.48023	0.0730595	7.10062	0.663196	0.000320866	0.00701894	0.00768566	0.00768566	319.031	359.656	394.906	72.8369	77.8532	78.5631
ENSMUSG00000026456	Cyb5r1	9.49267e-80	3.27836e-76	1.77956	0.0941085	6.3811	0.957562	0.00182557	0.00756088	0.0114591	0.0114591	100.19	98.5225	127.972	18.1741	16.922	17.666
ENSMUSG00000031026	Trim66	5.59677e-73	1.69127e-69	2.35947	0.130582	7.20241	1.6906	0.00114731	0.02443	0.00733441	0.02443	32.3641	33.4821	41.1542	2.71742	3.90083	3.57754
ENSMUSG00000020142	Slc1a4	1.88247e-60	5.05653e-57	1.20559	0.073507	8.1179	0.442515	0.000376191	0.00772874	0.00541758	0.00772874	56.0293	58.2458	67.5125	19.6815	17.3014	16.9893
ENSMUSG00000029777	Gars	1.14672e-56	2.77221e-53	1.00964	0.0636483	7.76343	0.310201	0.00013109	0.0053547	0.00594557	0.00594557	268.314	280.014	324.083	93.975	104.133	99.4631
ENSMUSG00000052397	Ezr	2.09797e-52	4.61077e-49	1.15593	0.0758776	7.44449	0.407762	0.000912458	0.00772365	0.00663307	0.00772365	68.2306	66.1021	65.0853	22.2299	22.1313	18.0453
ENSMUSG00000032637	Atxn2l	4.41919e-51	8.90282e-48	0.896235	0.0596152	9.31705	0.244833	0.000309599	0.00451738	0.00502136	0.00502136	177.056	188.138	206.943	82.4722	75.415	73.2353
ENSMUSG00000024493	Lars	4.28592e-50	7.97016e-47	0.904616	0.0607841	8.2585	0.249179	0.00027636	0.00432288	0.00526571	0.00526571	65.3112	64.1406	73.9307	28.6129	27.4581	25.7098
ENSMUSG00000024587	Nars	6.32468e-50	1.09214e-46	0.883702	0.059483	9.63312	0.237803	5.81144e-05	0.00434662	0.00524922	0.00524922	369.858	387.447	421.623	151.034	163.644	168.954
ENSMUSG00000023951	Vegfa	2.7266e-48	4.39438e-45	1.13481	0.0777157	8.12938	0.393583	0.000597502	0.0084621	0.00540402	0.0084621	330.16	386.322	357.148	114.049	98.5341	119.112
ENSMUSG00000073879	Gm5859	1.4231e-47	2.15022e-44	-3.89153	0.268586	4.67167	4.59921	0.0679305	0.00209618	0.0402769	0.0402769	0.183961	0.295572	0.290443	16.436	12.5934	9.52683
ENSMUSG00000038539	Atf5	3.21976e-45	4.32431e-42	1.30305	0.0923384	7.30835	0.519611	0.000544803	0.0122448	0.00700572	0.0122448	58.5133	53.7968	65.1545	14.367	18.179	14.7165
ENSMUSG00000024359	Hspa9	3.11346e-45	4.32431e-42	0.848871	0.0601438	9.74883	0.220082	5.51925e-05	0.0048291	0.00537073	0.00537073	363.136	379.294	428.743	159.957	170.062	168.789
ENSMUSG00000036964	Trim17	1.28036e-44	1.62909e-41	1.35432	0.0966405	6.44486	0.558007	0.00299677	0.0066963	0.0110123	0.0110123	12.6426	13.6175	15.4669	3.9348	3.47479	3.24781
ENSMUSG00000020096	Tbata	4.04146e-44	4.88512e-41	-1.22282	0.0877695	6.64462	0.449796	0.00178016	-0.000264218	0.00977507	0.00977507	18.9573	19.7372	20.86	65.9844	63.827	64.4305
ENSMUSG00000083929	Gm10600	4.66724e-44	5.37288e-41	-3.28605	0.236036	5.18207	3.30629	0.0261114	0.0574578	0.0279723	0.0574578	0.983175	0.749732	0.461169	19.2073	21.7329	15.616
ENSMUSG00000098178	Gm42418	6.54327e-44	7.19016e-41	-1.14777	0.0825875	7.28628	0.4034	0.00214929	0.00808175	0.00707128	0.00808175	17.9457	19.5823	18.2125	56.4359	67.5957	51.0529
ENSMUSG00000031770	Herpud1	1.15829e-43	1.21747e-40	0.990374	0.0714724	7.24255	0.297268	0.000456811	0.00331217	0.00720565	0.00720565	177.251	171.313	196.917	60.1222	67.2831	62.0242
ENSMUSG00000022208	Jph4	5.9985e-43	6.04224e-40	-0.821595	0.0598039	8.97703	0.203571	0.000430992	0.000900577	0.00493377	0.00493377	52.3265	50.6896	52.5474	111.653	121.526	118.637
ENSMUSG00000025408	Ddit3	1.1462e-42	1.10837e-39	0.973966	0.0711381	7.33615	0.287073	0.000665692	0.00244763	0.00692526	0.00692526	149.793	136.514	144.583	50.3645	50.2695	55.3725
ENSMUSG00000030785	Cox6a2	4.15476e-42	3.86313e-39	3.35703	0.246889	4.3073	3.43342	0.0386721	0.0269951	0.0527592	0.0527592	31.009	34.8849	38.3585	1.184	0.734294	1.46831
ENSMUSG00000068739	Sars	1.47252e-40	1.31845e-37	0.787481	0.0590591	9.1222	0.187506	0.000280068	0.00155531	0.0049519	0.0049519	308.842	299.01	335.129	144.078	140.661	136.877
ENSMUSG00000042834	Nrep	1.02087e-38	8.81413e-36	-0.980627	0.0753527	10.5041	0.295302	2.32166e-05	0.00849382	0.00677311	0.00849382	435.955	466.649	536.373	1244	1187.12	1355.87
ENSMUSG00000010095	Slc3a2	9.32099e-38	7.77017e-35	0.937446	0.0729884	8.2207	0.270034	0.000258745	0.0077322	0.00530353	0.0077322	361.514	380.164	449.866	155.497	155.319	137.879
ENSMUSG00000031513	Leprotl1	1.56143e-37	1.25825e-34	0.762153	0.0595256	8.44773	0.177727	0.000206626	0.00412349	0.00510831	0.00510831	102.473	109.593	121.711	51.825	51.2871	50.6974
ENSMUSG00000044165	Bcl2l15	1.90145e-37	1.48283e-34	-0.975417	0.0762731	7.1534	0.290052	0.00122737	0.004548	0.007499	0.007499	55.5666	59.9153	64.6647	148.459	151.906	158.952
ENSMUSG00000030717	Nupr1	7.81139e-37	5.90126e-34	1.69616	0.133786	5.43814	0.876291	0.0039775	0.0125234	0.0228705	0.0228705	59.3346	69.5838	71.9542	12.5665	9.70599	11.377
ENSMUSG00000028811	Yars	9.72239e-37	7.12239e-34	0.870323	0.0687404	7.49071	0.231349	0.000569658	0.00456826	0.0065182	0.0065182	226.707	214.222	226.628	82.2754	83.675	96.6987
ENSMUSG00000020256	Aldh1l2	1.24178e-35	8.82945e-33	1.78118	0.142958	6.33336	0.976302	0.00341598	0.0272393	0.0118118	0.0272393	39.7682	44.7682	57.3255	8.40237	8.36902	6.40681
ENSMUSG00000000805	Car4	2.41385e-35	1.66728e-32	-1.22867	0.0990358	7.37765	0.464661	0.000579346	0.0141328	0.00680941	0.0141328	99.1607	124.733	95.0237	348.175	301.768	355.794
ENSMUSG00000109511	Nup62	2.82424e-35	1.89656e-32	0.984779	0.0794575	7.3482	0.298513	0.00106072	0.00840953	0.0068911	0.00840953	37.3542	38.0976	43.5054	13.5786	16.5332	13.746
ENSMUSG00000037703	Lzts3	5.30961e-34	3.46918e-31	-0.738574	0.0607563	8.23483	0.164298	0.000247868	0.000565355	0.00528913	0.00528913	20.7998	20.7937	20.6683	44.5092	43.5689	40.5431
ENSMUSG00000028364	Tnc	1.08211e-33	6.88422e-31	-1.28748	0.106421	7.19108	0.510875	0.000910349	0.0160778	0.00737174	0.0160778	3.15102	3.91262	3.92557	14.0018	14.5221	11.3375
ENSMUSG00000038642	Ctss	1.4263e-33	8.84123e-31	0.930578	0.0770645	7.28701	0.266919	0.000861808	0.00804661	0.00706907	0.00804661	94.3175	81.7127	75.9684	33.667	29.4898	34.0858
ENSMUSG00000032715	Trib3	2.813e-33	1.7001e-30	3.85196	0.320481	3.66984	4.57453	0.0241041	0.129958	0.0923357	0.129958	29.5789	25.439	19.1016	0.31882	0.529771	0.778127
ENSMUSG00000004267	Eno2	3.10449e-33	1.83051e-30	-0.790457	0.0658102	8.73947	0.192644	0.000204294	0.00629219	0.00496507	0.00629219	337.041	320.763	271.233	656.868	649.092	631.104
ENSMUSG00000005667	Mthfd2	4.38947e-33	2.52656e-30	1.42294	0.118752	5.73294	0.617737	0.00303712	0.00984612	0.0181159	0.0181159	64.2628	88.6227	88.7984	14.5575	19.8811	17.6293
ENSMUSG00000057715	A830018L16Rik	5.30838e-33	2.98442e-30	1.97024	0.164643	6.83065	1.19708	0.00349166	0.0371694	0.00881243	0.0371694	58.5202	61.6845	78.893	9.69358	6.93313	10.2389
ENSMUSG00000025592	Dach2	6.86167e-33	3.77002e-30	1.56721	0.131197	5.70675	0.757495	0.00559507	0.0202241	0.0184903	0.0202241	9.95649	11.8378	13.6257	2.68617	2.00759	2.5876
ENSMUSG00000023883	Phf10	4.85974e-32	2.61076e-29	1.15745	0.0982423	6.79478	0.413486	0.000562889	0.0139144	0.00898549	0.0139144	180.118	204.146	229.613	63.6451	65.9715	76.3861
ENSMUSG00000041313	Slc7a1	1.06619e-31	5.60329e-29	1.39294	0.118901	7.12843	0.599048	0.000799613	0.0204065	0.00758606	0.0204065	50.2649	51.094	61.7298	12.0981	15.8692	11.7915
ENSMUSG00000007944	Ttc9b	1.90785e-31	9.81327e-29	-1.00419	0.0860805	6.65712	0.309573	0.0014097	0.00740661	0.00970507	0.00970507	7.15982	8.8713	8.83852	20.6629	23.4515	22.7209
ENSMUSG00000046607	Hrk	2.3666e-31	1.19193e-28	1.32157	0.113465	6.20054	0.539414	0.00131111	0.0180004	0.0128831	0.0180004	13.607	11.0671	13.0751	3.57922	3.7065	2.74108
ENSMUSG00000027122	Arl14ep	5.48834e-31	2.70777e-28	0.983125	0.0849319	7.89486	0.298616	0.00062457	0.0101956	0.00572417	0.0101956	107.65	121.277	142.443	44.9597	46.4516	45.9792
ENSMUSG00000056216	Cebpg	5.97768e-31	2.89021e-28	0.942691	0.0814904	6.91589	0.274569	0.000492413	0.00946863	0.00842343	0.00946863	59.8092	69.5363	76.202	24.8857	27.975	25.9021
ENSMUSG00000094065	Gm21541	3.90556e-30	1.85131e-27	-5.95392	0.522002	2.28381	10.6815	0.0346082	0.0238573	0.374121	0.374121	0	0	0	11.8537	13.3167	6.90581
ENSMUSG00000036887	C1qa	6.59677e-30	3.06686e-27	0.971962	0.0855583	6.6609	0.286262	0.00129622	0.0022656	0.0096841	0.0096841	54.5998	46.4601	51.923	18.6068	18.2686	18.5864
ENSMUSG00000021186	Fbln5	7.1239e-30	3.24944e-27	1.43407	0.12631	6.51796	0.636108	0.00227528	0.0216561	0.0105324	0.0216561	22.798	23.3482	29.0873	4.93858	6.01287	6.91489
ENSMUSG00000035885	Cox8a	7.69529e-30	3.44507e-27	-0.763568	0.0672939	8.75227	0.180345	0.000185534	0.00660716	0.00496145	0.00660716	593.197	642.177	739.059	1152.03	1229.22	1208.19
ENSMUSG00000038781	Stap2	1.1135e-29	4.89434e-27	-1.57901	0.139557	6.00072	0.771352	0.00375812	0.0254563	0.0147977	0.0254563	5.54046	4.85036	4.17327	27.126	18.4908	23.8264
ENSMUSG00000036905	C1qb	1.23322e-29	5.32378e-27	0.925459	0.0818595	6.82044	0.259262	0.00119038	0.0017089	0.00886109	0.00886109	60.355	54.3657	56.3788	20.9552	21.1557	22.9878
ENSMUSG00000026674	Ddr2	1.46393e-29	6.20888e-27	1.97604	0.175019	6.66913	1.20817	0.0037673	0.0421804	0.0096386	0.0421804	42.8563	52.5375	63.7997	7.099	8.8515	5.64749
ENSMUSG00000044067	Gpr22	1.69978e-29	7.08485e-27	-0.804928	0.0713763	7.2613	0.1984	0.000494572	0.00453875	0.00714729	0.00714729	27.6295	28.3147	32.3071	64.9441	67.1209	62.6156
ENSMUSG00000042532	Golga7b	3.58018e-29	1.46696e-26	-0.676525	0.0603419	8.33423	0.139101	0.000265317	0.00197907	0.00519641	0.00519641	38.2303	39.1884	41.4184	76.5913	73.5354	81.5354
ENSMUSG00000040010	Slc7a5	7.75663e-29	3.12528e-26	1.30888	0.117463	6.69659	0.530504	0.000532737	0.0201636	0.00948932	0.0201636	163.246	140.272	170.196	46.1856	41.5604	32.5919
ENSMUSG00000091542	Gm17167	9.27778e-29	3.67689e-26	-1.92393	0.172908	6.58664	1.14633	0.00351716	0.0413285	0.0101106	0.0413285	2.4495	2.33177	1.66496	17.1427	15.6757	11.3047
ENSMUSG00000074656	Eif2s2	5.1604e-28	2.01214e-25	0.640053	0.0583304	8.8026	0.126296	0.000154295	0.00409103	0.00494936	0.00494936	169.333	188.142	186.801	91.8276	91.4932	102.829
ENSMUSG00000032193	Ldlr	2.41272e-27	9.25833e-25	-0.90346	0.0834021	6.69312	0.248027	0.000925857	0.00301831	0.00950802	0.00950802	6.31703	7.00541	5.89442	16.3133	15.1775	15.4947
ENSMUSG00000036896	C1qc	3.27742e-27	1.23799e-24	1.04165	0.0964089	6.45126	0.336664	0.00157413	0.0123679	0.0109689	0.0123679	51.0368	38.5794	41.0208	16.0434	15.447	14.261
ENSMUSG00000108414	Snhg1	5.09655e-27	1.89552e-24	0.971125	0.0902206	6.46144	0.285117	0.00130911	0.00143016	0.0109005	0.0109005	125.444	126.294	140.858	47.1393	52.7873	53.8238
ENSMUSG00000017167	Cntnap1	8.84199e-27	3.23871e-24	-0.636432	0.0594072	8.46074	0.123001	0.000194434	0.0016645	0.0050994	0.0050994	39.062	41.2941	43.2409	76.4451	80.0277	74.8943
ENSMUSG00000046805	Mpeg1	3.20582e-26	1.15673e-23	1.26134	0.119071	6.81873	0.494304	0.00149773	0.019769	0.00886929	0.019769	20.4763	15.249	14.3253	5.09864	4.59536	4.29056
ENSMUSG00000027298	Tyro3	4.60083e-26	1.61196e-23	-0.919516	0.0870811	6.48859	0.259819	0.000653497	0.007054	0.0107212	0.0107212	32.4771	40.0634	35.4354	84.0523	80.6998	97.9779
ENSMUSG00000015568	Lpl	4.54792e-26	1.61196e-23	1.45034	0.137338	5.36884	0.639578	0.0041296	0.00653546	0.0241629	0.0241629	9.17537	7.43324	8.2596	1.81144	2.13665	1.77503
ENSMUSG00000035504	Reep6	6.48157e-26	2.23846e-23	1.53731	0.146034	7.05241	0.734592	0.00180591	0.0301831	0.00786513	0.0301831	44.9103	37.1428	53.3969	8.02619	10.5828	11.1688
ENSMUSG00000007030	Vwa7	6.65341e-26	2.26544e-23	-1.64551	0.156349	5.54211	0.841649	0.00622205	0.0304455	0.0210569	0.0304455	0.995375	1.05968	0.723073	5.63899	4.75656	3.93798
ENSMUSG00000038244	Mical2	7.31649e-26	2.45661e-23	-0.633561	0.0602493	8.61689	0.122547	0.000434002	0.00222438	0.00501097	0.00501097	63.3631	63.0933	67.5224	114.104	125.924	121.472
ENSMUSG00000066189	Cacng3	1.27456e-25	4.2209e-23	1.34824	0.128855	5.68975	0.558155	0.00616713	0.00987176	0.0187383	0.0187383	28.811	31.3924	38.0363	8.84948	7.4172	8.62741
ENSMUSG00000072568	Fam84b	2.92744e-25	9.56361e-23	0.96102	0.0925467	6.33114	0.282749	0.00101877	0.00608221	0.0118286	0.0118286	11.7481	13.1909	14.5956	5.2479	4.98054	4.73932
ENSMUSG00000029471	Camkk2	4.52139e-25	1.4574e-22	-0.668422	0.0646281	7.73423	0.135543	0.000266065	0.001617	0.00599913	0.00599913	69.3027	67.5551	69.8633	129.252	137.385	121.198
ENSMUSG00000020303	Stc2	1.40474e-24	4.46837e-22	2.90464	0.283839	3.57924	2.62777	0.00850223	0.112345	0.100436	0.112345	19.5576	22.6132	28.4456	1.76211	1.11731	0.672595
ENSMUSG00000095098	Ccdc85b	1.45243e-24	4.56007e-22	-0.91391	0.0893346	6.57732	0.260146	0.0016207	0.0103503	0.0101662	0.0103503	43.0709	41.694	47.8123	95.5839	123.978	90.2474
ENSMUSG00000007682	Dio2	2.05153e-24	6.35844e-22	-0.673159	0.0660175	7.72661	0.139412	0.000524083	0.00381163	0.00601338	0.00601338	13.3521	12.6521	11.4477	24.713	22.8114	25.8905
ENSMUSG00000021423	Ly86	2.87211e-24	8.78903e-22	1.07321	0.10559	6.25997	0.34892	0.00433708	-0.000103223	0.0123867	0.0123867	22.9324	20.2187	21.6899	6.8564	7.18841	7.7896
ENSMUSG00000027737	Slc7a11	1.17945e-23	3.56415e-21	0.822395	0.0820316	6.83167	0.210975	0.000343973	0.00974979	0.00880757	0.00974979	22.5194	25.6384	28.2207	10.2686	11.9081	11.1682
ENSMUSG00000027634	Ndrg3	2.01255e-23	6.0066e-21	-0.586854	0.0588476	8.53333	0.10665	0.000140511	0.0040233	0.00505406	0.00505406	371.596	370.326	374.85	643.806	665.573	574.815
ENSMUSG00000039278	Pcsk1n	2.58465e-23	7.62e-21	-0.668416	0.067194	7.86193	0.139452	0.00042242	0.00635014	0.00577669	0.00635014	33.8846	37.1541	31.4349	60.8764	71.8518	65.4402
ENSMUSG00000042182	Bend6	3.53108e-23	1.02848e-20	-0.590867	0.0595846	8.50408	0.10546	0.00025405	0.000649331	0.00507143	0.00507143	116.164	119.523	113.353	200.9	205.048	214.721
ENSMUSG00000100153	Ppp1ccb	6.59958e-23	1.89934e-20	-0.685258	0.0695424	8.07122	0.144436	0.00177933	0.00267352	0.00547489	0.00547489	91.4332	103.215	101.29	177.438	201.015	189.344
ENSMUSG00000048065	Cyb5r2	1.49945e-22	4.2646e-20	4.43668	0.454066	3.86597	6.15265	0.192449	0.116814	0.0772468	0.116814	7.69037	11.0148	11.1288	0.0381479	0.19564	0.141393
ENSMUSG00000028059	Arhgef2	1.57678e-22	4.4324e-20	1.25503	0.128511	7.33015	0.492348	0.00131899	0.0234537	0.00694243	0.0234537	224.187	203.708	243.426	68.7242	70.6182	51.058
ENSMUSG00000026494	Kif26b	2.5991e-22	7.2222e-20	-0.883777	0.0909691	7.59773	0.244249	0.000348025	0.012065	0.00627304	0.012065	6.64365	6.73241	8.12998	17.5713	18.9432	15.1689
ENSMUSG00000020428	Gabra6	2.76467e-22	7.59498e-20	-0.738986	0.0761147	10.316	0.170782	3.30795e-05	0.0086571	0.00631158	0.0086571	403.515	434.289	502.998	897.837	896.552	988.009
ENSMUSG00000050822	Slc29a4	3.69615e-22	1.00398e-19	-0.840236	0.0868085	7.402	0.215042	0.00455986	-0.000505784	0.00674372	0.00674372	26.3679	25.2828	27.818	57.9921	65.8514	58.7366
ENSMUSG00000068259	Olfr461	4.31109e-22	1.15184e-19	2.41849	0.250272	4.15905	1.80994	0.0343684	0.0346552	0.0595855	0.0595855	4.39015	3.50667	3.97542	0.434323	0.221744	0.434875
ENSMUSG00000034667	Xpot	4.33576e-22	1.15184e-19	0.92999	0.0962438	6.45034	0.26161	0.00291915	-0.00023735	0.0109751	0.0109751	93.2503	95.4398	106.092	36.8546	37.2802	35.7753
ENSMUSG00000047496	Rnf152	4.48003e-22	1.17723e-19	-0.742819	0.0769003	8.78267	0.17263	0.000147405	0.00872307	0.00495374	0.00872307	22.1506	22.364	25.5997	47.4197	54.5894	45.6763
ENSMUSG00000074968	Ano3	6.44725e-22	1.67594e-19	-0.952237	0.0989631	6.14666	0.281343	0.00133194	0.0103131	0.0133586	0.0133586	4.90766	5.18958	6.48283	14.2005	14.2071	15.7259
ENSMUSG00000040794	C1qtnf4	6.73935e-22	1.73323e-19	-1.06554	0.110791	7.10966	0.355342	0.00107424	0.0173376	0.00765297	0.0173376	23.6208	26.7786	29.7384	68.5784	91.426	69.3206
ENSMUSG00000061859	Patj	7.70363e-22	1.96037e-19	-1	0.104126	7.54872	0.313014	0.00114305	0.0151202	0.00638181	0.0151202	21.9767	18.9523	17.0754	56.7529	54.4232	44.2006
ENSMUSG00000025478	Dpysl4	1.00131e-21	2.52152e-19	-0.588664	0.0614679	8.83272	0.106853	0.000723697	0.00289574	0.00494376	0.00494376	66.3283	57.579	62.4081	114.513	106.329	112.215
ENSMUSG00000062591	Tubb4a	1.01613e-21	2.53246e-19	-0.624933	0.0652655	10.3364	0.118995	3.18716e-05	0.00225874	0.00635751	0.00635751	370.533	399.122	377.908	691.993	754.202	678.017
ENSMUSG00000026615	Eprs	1.0711e-21	2.64223e-19	0.689928	0.0720943	8.67822	0.149037	0.000100116	0.00769626	0.00498545	0.00769626	118.103	125.614	146.757	66.5755	65.6982	61.9611
ENSMUSG00000047904	Sstr2	1.09702e-21	2.67884e-19	1.96408	0.20529	4.36276	1.1958	0.0126977	0.0354476	0.0505182	0.0505182	7.44677	5.51654	5.48792	0.660105	1.05237	1.01276
ENSMUSG00000058258	Idi1	2.20362e-21	5.32725e-19	-0.857598	0.0903217	6.37496	0.226184	0.000733482	0.00619389	0.0115035	0.0115035	39.3964	46.1017	39.2527	84.8652	96.2535	97.6468
ENSMUSG00000022658	Tagln3	2.43184e-21	5.82077e-19	-0.771388	0.08133	8.89936	0.186449	0.000151092	0.00977077	0.00493568	0.00977077	191.113	178.703	169.523	352.046	348.764	433.212
ENSMUSG00000033615	Cplx1	2.83679e-21	6.72347e-19	-0.547156	0.0577865	9.08411	0.0923953	6.45242e-05	0.00316221	0.0049444	0.0049444	229.211	206.006	197.639	347.596	360.492	359.77
ENSMUSG00000027965	Olfm3	3.75184e-21	8.80591e-19	-0.726139	0.076927	9.1675	0.165285	0.000136258	0.00874039	0.0049634	0.00874039	86.9307	94.3049	105.104	181.627	199.666	212.509
ENSMUSG00000031490	Eif4ebp1	6.19884e-21	1.44093e-18	2.57268	0.274081	5.10752	2.07575	0.00899901	0.103682	0.0295857	0.103682	19.2443	16.5743	27.6264	1.34945	2.41337	1.19823
ENSMUSG00000102030	Gm29106	8.01058e-21	1.84434e-18	2.15797	0.230564	4.29275	1.45607	0.0263671	0.0474085	0.0533727	0.0533727	3.98799	2.41767	3.34135	0.361616	0.488829	0.26933
ENSMUSG00000029385	Ccng2	9.48664e-21	2.16358e-18	-0.692793	0.0741619	7.50166	0.150589	0.000527924	0.00772207	0.00649181	0.00772207	37.7893	35.7042	42.8878	80.1764	80.1935	69.9332
ENSMUSG00000084845	Tmem240	1.13634e-20	2.56738e-18	-0.670041	0.0718736	7.42686	0.13652	0.00107033	0.0012216	0.00667838	0.00667838	35.9318	39.4814	35.8222	71.9389	73.6215	67.4365
ENSMUSG00000051401	Kctd16	1.64243e-20	3.67645e-18	2.08137	0.224205	4.24506	1.32732	0.0199363	0.0146777	0.0554655	0.0554655	6.29686	5.98776	8.76607	0.793322	0.9913	0.703526
ENSMUSG00000026688	Mgst3	1.72115e-20	3.81732e-18	-0.634401	0.0683742	7.51235	0.124632	0.000546226	0.00431938	0.00646633	0.00646633	63.9055	58.6822	57.1767	103.261	107.641	119.287
ENSMUSG00000021203	Otub2	1.7597e-20	3.86734e-18	0.777218	0.0837882	6.91961	0.188952	0.00212353	0.00754064	0.00840715	0.00840715	19.1939	19.74	23.7891	9.01169	10.201	9.35899
ENSMUSG00000024736	Tmem132a	1.98149e-20	4.31554e-18	-0.553246	0.0597243	9.66116	0.0931646	7.37764e-05	0.00160155	0.00527671	0.00527671	102.986	98.1601	105.779	169.417	182.658	177.924
ENSMUSG00000052336	Cx3cr1	2.06819e-20	4.46414e-18	0.730309	0.0788776	6.98644	0.163731	0.00120719	0.00344998	0.00812531	0.00812531	17.3956	16.2794	14.6249	7.35214	7.66802	7.95483
ENSMUSG00000040972	Igsf21	2.63461e-20	5.63642e-18	-0.61169	0.0662513	7.64228	0.114389	0.000404781	0.00226942	0.00617908	0.00617908	30.7243	28.0315	29.3857	50.511	55.9512	52.7022
ENSMUSG00000054459	Vsnl1	4.46825e-20	9.47543e-18	-0.542532	0.0591242	9.53795	0.0920904	7.85089e-05	0.00465647	0.005165	0.005165	302.349	321.65	280.641	474.903	522.346	545.856
ENSMUSG00000023067	Cdkn1a	4.58798e-20	9.64474e-18	1.319	0.143787	7.45614	0.546736	0.000394123	0.0306178	0.00660357	0.0306178	110.756	126.212	138.717	25.853	32.8419	40.1251
ENSMUSG00000029419	Ajm1	5.13075e-20	1.06928e-17	-0.645222	0.0704295	8.85971	0.130846	0.000733424	0.00670706	0.00493977	0.00670706	54.1764	44.3764	47.4684	83.2943	92.0338	91.7122
ENSMUSG00000050700	Emilin3	7.15225e-20	1.47783e-17	-1.41682	0.155262	5.11654	0.619539	0.00677122	0.0148881	0.0293883	0.0293883	0.927655	0.68261	0.937018	3.63878	3.53975	3.13681
ENSMUSG00000029632	Ndufa4	7.68711e-20	1.57488e-17	-0.610998	0.0670137	8.42278	0.117384	0.000169762	0.00656648	0.00512608	0.00656648	752.092	689.897	619.368	1088.95	1124.62	1231.84
ENSMUSG00000026483	Fam129a	1.15589e-19	2.3482e-17	1.70341	0.187741	5.62284	0.912773	0.0155571	0.0373127	0.0197521	0.0373127	6.31581	7.1249	10.8253	1.34437	1.27795	1.65506
ENSMUSG00000054136	Adm2	1.63413e-19	3.2921e-17	5.98576	0.66248	2.94807	11.2755	0.0481063	0.610212	0.187817	0.610212	9.05158	12.332	14.4978	0	0.0903568	0
ENSMUSG00000027797	Dclk1	1.94144e-19	3.87887e-17	-0.529614	0.0587381	9.44159	0.0866347	8.16237e-05	0.00302778	0.00509362	0.00509362	126.636	141.395	143.997	224.364	229.797	242.229
ENSMUSG00000056999	Ide	2.36539e-19	4.68716e-17	0.627312	0.0697412	7.66934	0.123893	0.000372659	0.0069231	0.00612423	0.0069231	79.6675	82.1936	95.4192	46.2936	47.6978	42.484
ENSMUSG00000023456	Tpi1	3.02861e-19	5.95257e-17	-0.519462	0.0579261	8.72691	0.0842987	6.43207e-05	0.00411876	0.00496883	0.00496883	360.169	344.082	309.736	520.458	528.441	555.559
ENSMUSG00000031960	Aars	3.8705e-19	7.54592e-17	0.63882	0.0714515	7.19633	0.126438	0.000303604	0.00470941	0.00735437	0.00735437	126.729	132.997	148.097	69.3182	70.945	64.6746
ENSMUSG00000024245	Tmem178	4.78664e-19	9.25736e-17	-0.55608	0.0623611	8.06076	0.0957028	0.00034514	0.00332386	0.00548823	0.00548823	68.4177	60.4194	67.8698	113.01	116.718	108.489
ENSMUSG00000024403	Atp6v1g2	5.48104e-19	1.05162e-16	-0.522198	0.0586602	8.77121	0.0859364	0.000140821	0.00502071	0.0049565	0.00502071	229.219	208.708	188.4	341.031	347.627	333.377
ENSMUSG00000028708	Mknk1	5.89946e-19	1.12299e-16	0.822745	0.0925065	6.45309	0.209822	0.00187962	0.00655675	0.0109566	0.0109566	80.0025	76.4501	95.6794	34.6091	33.0978	36.0529
ENSMUSG00000032021	Crtam	1.15998e-18	2.19082e-16	-0.868301	0.0984635	8.10207	0.237818	0.000838346	0.0137043	0.00543662	0.0137043	18.5352	18.5551	19.8702	50.7338	48.8892	37.2234
ENSMUSG00000033909	Usp36	1.46479e-18	2.74507e-16	0.587709	0.0668434	7.81807	0.104882	0.000852379	0.000724653	0.00584967	0.00584967	33.4632	33.1852	34.8529	18.9107	19.4871	17.8153
ENSMUSG00000069516	Lyz2	1.59383e-18	2.9639e-16	0.883608	0.100606	6.2142	0.237683	0.00241597	0.0019018	0.0127664	0.0127664	29.5599	27.3307	29.6846	12.8152	10.9791	11.4252
ENSMUSG00000086040	Wipf3	2.1224e-18	3.91672e-16	-0.678133	0.0774957	7.22803	0.140779	0.00175675	0.0017673	0.00725162	0.00725162	8.01892	8.79678	8.95817	16.6763	17.981	15.908
ENSMUSG00000028698	Pik3r3	2.18232e-18	3.99679e-16	-0.605606	0.0692323	8.32341	0.115779	0.000225474	0.00696419	0.00520578	0.00696419	73.2837	86.3254	78.4686	135.74	156.552	133.686
ENSMUSG00000028601	Echdc2	2.38814e-18	4.34085e-16	-0.981143	0.112294	5.87178	0.299149	0.00263308	0.0103129	0.0162818	0.0162818	14.8585	19.2992	16.5994	44.3451	37.8647	41.6085
ENSMUSG00000038026	Kcnj9	2.47933e-18	4.47298e-16	-0.54883	0.0628453	7.90379	0.0910067	0.000214028	0.000589075	0.00571026	0.00571026	32.9986	33.3027	34.7765	56.1357	59.4412	57.1889
ENSMUSG00000040146	Rgl3	3.26364e-18	5.84434e-16	-0.608055	0.0698761	7.58765	0.11647	0.00102904	0.00590951	0.00629496	0.00629496	20.5994	18.3571	21.7196	40.3504	35.1625	34.2876
ENSMUSG00000023020	Cox14	3.68299e-18	6.54678e-16	-0.616828	0.0709963	7.33566	0.11712	0.000634033	0.00308683	0.00692668	0.00692668	89.4062	89.7383	98.0996	171.945	159.807	148.335
ENSMUSG00000036093	Arl5a	3.95032e-18	6.97073e-16	-0.517518	0.0596204	8.45652	0.0842895	0.000229625	0.00469799	0.00510226	0.00510226	61.854	66.7198	68.103	103.265	119.055	106.748
ENSMUSG00000037851	Iars	5.38899e-18	9.4405e-16	0.726315	0.0840173	6.63315	0.166382	0.000748364	0.00940472	0.00984001	0.00984001	76.0064	83.0394	97.1551	40.0611	41.1658	33.3342
ENSMUSG00000029054	Gabrd	6.0232e-18	1.04756e-15	-0.514105	0.0595573	8.85158	0.082829	0.000379732	0.00404263	0.00494087	0.00494087	106.515	115.118	118.831	189.988	171.476	201.609
ENSMUSG00000022369	Mtbp	6.26745e-18	1.08225e-15	1.41183	0.163641	5.2322	0.615455	0.0132608	0.00858859	0.0269069	0.0269069	12.234	12.6945	10.1577	3.23162	2.93844	2.28479
ENSMUSG00000021665	Hexb	7.81058e-18	1.33915e-15	0.576172	0.0669785	7.57048	0.103293	0.000396371	0.00423001	0.00633281	0.00633281	112.705	100.249	104.305	57.709	53.588	62.7417
ENSMUSG00000060882	Kcnd2	1.07545e-17	1.83092e-15	-0.4992	0.0582799	9.27076	0.0784809	9.47098e-05	0.0045561	0.0050001	0.0050001	68.3433	68.6049	78.7595	118.836	122.264	114.882
ENSMUSG00000104282	Gm37460	1.12567e-17	1.90301e-15	1.52313	0.177929	4.77433	0.730575	0.0100054	0.0332436	0.0374827	0.0374827	5.04663	5.37439	6.91495	0.941874	1.45599	1.3833
ENSMUSG00000011751	Sptbn4	1.24977e-17	2.09813e-15	-0.512575	0.0599626	8.62539	0.0826179	0.000386158	0.00436121	0.00500712	0.00500712	31.767	30.4453	30.8436	47.2773	50.7216	56.7372
ENSMUSG00000057615	Ldoc1	1.283e-17	2.13907e-15	-1.21902	0.142655	5.80247	0.470224	0.00377745	0.0267484	0.0171661	0.0267484	6.29828	4.19685	6.51679	18.1981	19.4452	17.9317
ENSMUSG00000053398	Phgdh	1.41861e-17	2.34897e-15	0.807188	0.0945894	6.88262	0.206202	0.000659414	0.0127613	0.0085715	0.0127613	144.494	140.662	185.803	59.8572	64.5442	64.8919
ENSMUSG00000002820	Atg4d	1.78505e-17	2.93561e-15	-0.737201	0.0866583	6.69035	0.166223	0.00174155	0.0022374	0.00952294	0.00952294	22.3671	20.8814	20.4794	46.3984	40.0034	43.729
ENSMUSG00000020620	Abca8b	2.46061e-17	4.01927e-15	-0.588185	0.0694459	7.38383	0.105092	0.000441519	0.00118802	0.00679259	0.00679259	8.09293	8.60035	8.35121	15.3766	15.5013	14.2168
ENSMUSG00000062488	Ifit3b	3.32087e-17	5.38805e-15	1.19973	0.142238	5.93106	0.456083	0.00320111	0.0271462	0.015574	0.0271462	12.8422	17.7171	16.6364	4.82564	5.42766	3.86418
ENSMUSG00000110631	Gm42047	3.53869e-17	5.70319e-15	0.854206	0.101362	7.05979	0.23123	0.00108952	0.014322	0.00783707	0.014322	17.5598	21.7233	21.478	9.87494	8.16178	7.6374
ENSMUSG00000047181	Samd14	4.25101e-17	6.80584e-15	-0.573864	0.0682704	7.42231	0.103477	0.000301067	0.00555038	0.0066902	0.0066902	43.3376	37.5834	39.6516	66.4848	76.119	65.4244
ENSMUSG00000036067	Slc2a6	4.88002e-17	7.76148e-15	-0.868038	0.103467	6.12917	0.234875	0.00253955	0.00849499	0.0135185	0.0135185	5.88804	6.34548	4.75938	13.365	12.3373	13.7559
ENSMUSG00000037071	Scd1	5.45736e-17	8.62299e-15	-0.514387	0.0614091	9.05079	0.0839035	0.000115198	0.00554142	0.00493944	0.00554142	59.3106	60.0718	51.2673	89.7562	101.423	93.5114
ENSMUSG00000031700	Gpt2	6.74184e-17	1.05834e-14	0.781236	0.0935448	6.5355	0.1936	0.00108219	0.0120437	0.0104221	0.0120437	71.8682	76.1762	91.9315	35.0142	37.722	30.3585
ENSMUSG00000027525	Phactr3	7.26904e-17	1.13285e-14	-0.514352	0.0616539	8.33989	0.0839289	0.000333573	0.00536823	0.00519157	0.00536823	51.4386	50.7977	49.9129	75.1559	86.0128	90.5885
ENSMUSG00000010755	Cars	7.31019e-17	1.13285e-14	0.942963	0.113039	6.6862	0.282087	0.0017783	0.0173885	0.00954537	0.0173885	171.824	161.241	167.11	63.561	48.4428	67.6493
ENSMUSG00000037217	Syn1	7.89582e-17	1.21581e-14	-0.53451	0.0641454	8.95939	0.0906479	0.000114871	0.00605707	0.00493349	0.00605707	65.9988	71.8554	62.9147	106.731	125.301	107.979
ENSMUSG00000020429	Igfbp1	8.22462e-17	1.25842e-14	2.6248	0.31518	4.34688	2.18608	0.02553	0.123477	0.0511445	0.123477	7.36562	9.50343	10.0394	0.770755	0.336439	0.919027
ENSMUSG00000028552	Eps15	8.36745e-17	1.27222e-14	0.557462	0.066955	8.88748	0.0986088	0.000126672	0.00659779	0.00493669	0.00659779	306.417	319.453	378.18	187.557	185.917	189.728
ENSMUSG00000029446	Psph	8.80207e-17	1.32994e-14	1.00216	0.120453	5.83541	0.308039	0.00502528	0.00340181	0.0167381	0.0167381	62.7918	57.6829	60.2086	22.6233	21.3071	18.028
ENSMUSG00000031654	Cbln1	1.0348e-16	1.55381e-14	-0.530261	0.0638812	10.2075	0.0883777	3.88696e-05	0.00499216	0.00608235	0.00608235	525.621	453.717	538.415	862.803	813.22	863.656
ENSMUSG00000019194	Scn1b	1.22249e-16	1.82431e-14	-0.484535	0.0585124	9.28546	0.0734408	0.000129013	0.00363171	0.00500653	0.00500653	237.663	204.308	227.551	356.859	367.106	342.455
ENSMUSG00000015476	Prrt1	1.29082e-16	1.91446e-14	-0.508195	0.0614176	8.15686	0.0813596	0.000285789	0.00456524	0.0053724	0.0053724	74.1387	74.7814	81.6155	122.513	116.949	136.557
ENSMUSG00000046449	Nexmif	1.3488e-16	1.98825e-14	0.603577	0.0729911	7.215	0.113663	0.000698103	0.00476594	0.00729345	0.00729345	7.3612	7.87613	8.05452	3.92798	4.63672	4.23254
ENSMUSG00000037977	6430571L13Rik	1.43506e-16	2.10258e-14	-0.712701	0.0862647	6.65323	0.161313	0.00130903	0.00985338	0.00972679	0.00985338	16.357	13.6296	14.7813	32.1205	31.8185	26.085
ENSMUSG00000022241	Tars	1.61129e-16	2.34656e-14	0.716183	0.0868316	6.79473	0.162923	0.00228241	0.00902718	0.00898571	0.00902718	83.2033	92.767	90.3399	45.3699	35.5887	45.2835
ENSMUSG00000038375	Trp53inp2	1.67831e-16	2.42954e-14	-0.527899	0.0640415	7.73377	0.0879689	0.000151985	0.00530497	0.00599999	0.00599999	94.6961	108.486	109.69	155.742	174.347	168.692
ENSMUSG00000043843	Tmem145	1.83358e-16	2.63849e-14	-0.700277	0.0850626	7.60142	0.155799	0.000455275	0.0103982	0.00626509	0.0103982	44.22	34.3965	38.2723	79.1428	71.4319	78.8665
ENSMUSG00000060802	B2m	2.09273e-16	2.99359e-14	0.519462	0.0632207	7.98124	0.0846027	0.000399815	0.00416314	0.00559547	0.00559547	308.908	335.312	311.579	166.726	186.272	196.267
ENSMUSG00000024521	Pmaip1	2.14027e-16	3.0436e-14	1.5515	0.188886	4.60955	0.727676	0.0114279	-0.00452031	0.0420893	0.0420893	4.07174	3.9564	4.54061	0.972395	0.84568	0.823318
ENSMUSG00000021091	Serpina3n	2.26331e-16	3.19973e-14	1.46021	0.177917	5.59019	0.67765	0.00440653	0.0430753	0.020269	0.0430753	11.7908	9.07483	11.2912	2.01098	3.33111	2.16686
ENSMUSG00000024640	Psat1	2.45529e-16	3.45096e-14	0.689332	0.0840909	6.68587	0.151039	0.000293497	0.0103134	0.00954714	0.0103134	133.021	141.416	157.126	75.3972	66.2267	61.4051
ENSMUSG00000043873	Chil5	3.443e-16	4.81124e-14	-1.06948	0.131117	5.58413	0.363766	0.00432025	0.0214671	0.0203665	0.0214671	8.30817	7.88666	6.42972	18.4326	19.7112	26.2646
ENSMUSG00000066621	Tecpr1	3.67946e-16	5.11213e-14	-0.551772	0.0677131	7.80562	0.0933965	0.00100657	0.0015695	0.00587102	0.00587102	55.0626	59.3102	58.1361	96.7723	89.8158	100.102
ENSMUSG00000071235	Vrtn	4.94955e-16	6.83745e-14	5.09783	0.628374	1.85577	7.85595	0.0143032	0.0601891	0.577978	0.577978	1.32699	0.636065	1.13526	0	0	0
ENSMUSG00000040945	Rcc2	5.0384e-16	6.9006e-14	0.769207	0.0948401	6.28316	0.181811	0.00129136	0.00409259	0.0122006	0.0122006	70.061	76.1412	82.1505	31.0254	32.9777	35.3145
ENSMUSG00000109523	Gdf1	5.05236e-16	6.9006e-14	-5.34442	0.658973	1.97906	8.67341	0.140897	-0.0102096	0.510471	0.510471	0	0	0	1.73171	3.75533	4.70143
ENSMUSG00000020684	Rasl10b	7.44065e-16	1.01055e-13	-0.485181	0.0601733	8.39022	0.0718298	0.00028063	0.00123125	0.00515062	0.00515062	35.4887	34.8696	37.3758	55.4131	60.0154	58.6522
ENSMUSG00000041168	Lonp1	8.203e-16	1.10786e-13	0.476597	0.0591962	8.58856	0.0714096	0.000231798	0.00385102	0.00502449	0.00502449	63.7365	65.9435	74.516	40.0888	42.1679	42.875
ENSMUSG00000021062	Rab15	9.09104e-16	1.22098e-13	-0.630911	0.0784857	6.87393	0.121468	0.000629005	0.00193792	0.00861101	0.00861101	45.0658	47.8983	47.9933	85.3169	91.7899	80.7272
ENSMUSG00000096847	Tmem151b	1.08996e-15	1.45579e-13	-0.575688	0.0718148	8.94484	0.105614	0.000152369	0.00758368	0.00493358	0.00758368	37.8655	39.4718	45.1411	69.4792	79.1363	67.2648
ENSMUSG00000027220	Syt13	1.13756e-15	1.51102e-13	-0.470703	0.0587569	8.6645	0.0671155	0.000187845	0.000621136	0.00499071	0.00499071	46.5013	48.8144	45.0574	75.1742	75.4717	73.3207
ENSMUSG00000020932	Gfap	1.14816e-15	1.51676e-13	0.927357	0.115777	9.35076	0.274082	0.000128207	0.0199781	0.00503874	0.0199781	359.43	248.065	271.424	117.152	104.962	117.217
ENSMUSG00000030557	Mef2a	1.23893e-15	1.62778e-13	0.463849	0.0579774	8.81738	0.0682709	9.55978e-05	0.00455951	0.00494646	0.00494646	139.477	141.042	156.819	90.6052	97.7817	86.9815
ENSMUSG00000056222	Spock1	1.30378e-15	1.70373e-13	-0.539024	0.0674266	8.58239	0.0926197	0.000295257	0.00652426	0.00502759	0.00652426	58.2804	56.314	64.3055	98.5534	112.373	95.1009
ENSMUSG00000020607	Fam84a	1.3637e-15	1.77244e-13	-0.633021	0.0792396	7.02649	0.122814	0.00145307	0.00179542	0.0079653	0.0079653	17.3943	15.5743	14.939	29.3089	30.4823	30.0714
ENSMUSG00000090799	Klhl33	1.83488e-15	2.37209e-13	0.610073	0.0767192	6.96917	0.113475	0.000632405	0.00164069	0.00819636	0.00819636	33.0739	35.7323	36.5887	18.9164	17.9146	19.6033
ENSMUSG00000079056	Kcnip3	2.14962e-15	2.7642e-13	-0.551394	0.0695117	8.01303	0.097009	0.000242914	0.00700491	0.00555133	0.00700491	42.9781	42.2155	46.1683	77.6674	82.8121	66.4401
ENSMUSG00000025007	Aldh18a1	2.36529e-15	3.02544e-13	0.906133	0.114403	5.97356	0.256347	0.00453887	0.0079912	0.0150933	0.0150933	71.1566	70.0067	80.4192	30.4793	28.4333	23.779
ENSMUSG00000025498	Irf7	3.46566e-15	4.40959e-13	1.5738	0.199901	4.33249	0.757307	0.00821818	0.0096022	0.0517224	0.0517224	10.1149	14.5199	12.7745	2.19677	2.53374	2.42416
ENSMUSG00000043289	Mei4	3.48889e-15	4.41591e-13	1.12432	0.142825	5.41766	0.400714	0.00735299	0.0195012	0.0232454	0.0232454	6.76346	8.50411	9.77482	3.00259	2.31157	2.8083
ENSMUSG00000025591	Tma16	3.70629e-15	4.66665e-13	0.744455	0.0946604	6.35141	0.17332	0.00176437	0.00705585	0.0116765	0.0116765	16.6713	14.1484	15.4299	6.44494	7.65674	7.71757
ENSMUSG00000097166	9330179D12Rik	4.08606e-15	5.11816e-13	1.74184	0.221826	4.3147	0.935973	0.0213592	0.0108557	0.0524513	0.0524513	10.1203	8.6398	10.1706	2.11338	1.35709	1.44598
ENSMUSG00000025875	Tspan17	4.77231e-15	5.94694e-13	-0.831687	0.10618	6.63041	0.22104	0.00330585	0.0136056	0.00985564	0.0136056	42.084	44.3912	45.2123	88.9967	78.5598	106.63
ENSMUSG00000108053	Gm43890	4.88239e-15	6.05291e-13	1.69305	0.216229	4.30842	0.895553	0.01742	0.0271103	0.0527125	0.0527125	2.36173	2.95146	3.41954	0.680529	0.479935	0.434495
ENSMUSG00000097428	AW047730	5.09197e-15	6.28053e-13	-0.746598	0.0954165	6.87063	0.178148	0.00223895	0.0114175	0.0086261	0.0114175	13.983	15.0066	17.1866	28.665	36.6876	30.1467
ENSMUSG00000074305	Peak1	5.22284e-15	6.40924e-13	-0.749633	0.0958435	7.30096	0.179608	0.000435336	0.0133436	0.00702752	0.0133436	9.14749	9.17094	10.6765	20.9768	22.4204	17.4568
ENSMUSG00000031962	Cdh15	5.37103e-15	6.55781e-13	-0.548905	0.0702113	7.37976	0.0936976	0.000590792	0.00354491	0.00680364	0.00680364	11.9894	12.629	13.8036	22.135	23.2091	20.7685
ENSMUSG00000029359	Tesc	5.62776e-15	6.83673e-13	-0.913991	0.116998	6.50857	0.26704	0.00146478	0.019068	0.0105922	0.019068	23.5547	24.9147	29.0112	68.0343	66.6043	50.2004
ENSMUSG00000025220	Mgea5	6.65623e-15	8.04571e-13	0.454125	0.0582896	9.26379	0.0635232	9.93539e-05	0.00196844	0.00499716	0.00499716	110.426	113.463	117.083	67.9861	73.0241	74.8439
ENSMUSG00000032517	Mobp	8.41211e-15	1.01175e-12	-0.447139	0.0576121	8.84513	0.0630939	3.6919e-05	0.00385532	0.0049418	0.0049418	734.577	737.756	683.335	1070.08	964.175	1079.54
ENSMUSG00000041670	Rims1	9.07228e-15	1.08575e-12	-0.493001	0.0635996	9.66756	0.0777688	0.000222518	0.00584485	0.00528316	0.00584485	78.5024	87.4514	95.3356	137.107	140.319	148.935
ENSMUSG00000026163	Sphkap	9.83417e-15	1.17114e-12	-0.510938	0.0660009	10.3086	0.08192	0.00023912	0.00426429	0.00629505	0.00629505	151.61	168.371	177.601	265.235	285.499	276.121
ENSMUSG00000093930	Hmgcs1	1.06297e-14	1.25967e-12	-0.710707	0.0919237	9.17408	0.161671	0.000123519	0.0125514	0.0049653	0.0125514	122.687	161.267	126.366	286.491	255.515	290.905
ENSMUSG00000052726	Kcnt2	1.5097e-14	1.78034e-12	2.81409	0.366099	4.5124	2.53657	0.0206515	0.180391	0.0451465	0.180391	6.80892	7.32586	9.65774	0.213483	0.611596	0.661609
ENSMUSG00000060240	Cend1	1.73199e-14	2.03256e-12	-0.444738	0.0579909	8.98243	0.0617714	0.000110477	0.00293182	0.00493393	0.00493393	159.691	148.319	137.856	222.174	227.538	233.516
ENSMUSG00000039910	Cited2	1.9743e-14	2.30573e-12	-0.522162	0.0682361	7.91073	0.0873834	0.000591866	0.00639238	0.00569955	0.00639238	51.4751	46.5337	51.6993	76.7088	92.8322	82.3644
ENSMUSG00000025889	Snca	2.43318e-14	2.82799e-12	-0.624459	0.0818922	7.87032	0.125032	0.000475502	0.00958399	0.00576313	0.00958399	74.4477	80.6127	79.8072	125.334	148.919	158.065
ENSMUSG00000037242	Clic4	4.15027e-14	4.78624e-12	0.711287	0.0941329	9.39469	0.162412	7.64704e-05	0.013215	0.0050638	0.013215	178.054	198.507	231.495	101.7	105.397	88.5276
ENSMUSG00000034161	Scx	4.15765e-14	4.78624e-12	-1.42904	0.189127	4.95645	0.655567	0.0178965	0.035757	0.0329952	0.035757	1.88868	1.44308	2.30468	9.51862	6.03664	7.6314
ENSMUSG00000034059	Ypel4	4.23392e-14	4.85094e-12	-0.631501	0.0836026	7.6248	0.128025	0.00077688	0.00970721	0.0062154	0.00970721	40.6688	39.9158	32.2919	67.36	66.1146	73.4165
ENSMUSG00000059743	Fdps	4.29653e-14	4.87646e-12	-0.588131	0.0778808	6.92876	0.109412	0.00073066	0.0063225	0.00836746	0.00836746	45.4219	50.251	42.4968	82.9616	87.7731	86.7225
ENSMUSG00000061576	Dpp6	4.29561e-14	4.87646e-12	-0.438145	0.0580193	8.88897	0.0593198	0.000112813	0.0020476	0.00493655	0.00493655	92.408	92.8346	87.5503	138.375	147.246	132.471
ENSMUSG00000026825	Dnm1	4.86637e-14	5.49741e-12	-0.484485	0.064294	10.2415	0.0746429	4.91471e-05	0.00523244	0.00615143	0.00615143	317.932	290.162	305.132	481.706	535.106	444.991
ENSMUSG00000025867	Cplx2	4.98232e-14	5.60221e-12	-0.602047	0.0799279	10.1479	0.116404	4.61983e-05	0.0095365	0.00596701	0.0095365	132.141	120.216	139.704	235.488	264.871	207.063
ENSMUSG00000074782	4833422C13Rik	5.36679e-14	6.00659e-12	0.720781	0.0958145	6.30858	0.157811	0.00176929	0.000672352	0.0120014	0.0120014	17.9498	18.5989	19.1672	8.72693	8.63212	9.66994
ENSMUSG00000034115	Scn11a	5.39633e-14	6.01181e-12	-1.32391	0.176006	4.79125	0.559552	0.00942428	0.0327391	0.037043	0.037043	0.468128	0.438369	0.386544	1.19283	1.99541	1.77892
ENSMUSG00000023795	Pisd-ps2	6.60797e-14	7.32787e-12	-1.11295	0.148484	5.7104	0.398056	0.00489883	0.0281725	0.0184377	0.0281725	6.66625	5.66197	7.25755	22.1353	14.934	21.6483
ENSMUSG00000022763	Aifm3	7.08563e-14	7.8217e-12	-0.94847	0.126695	8.72483	0.289141	0.000713767	0.0233635	0.00496948	0.0233635	82.7817	74.8999	59.6878	201.47	154.966	196.126
ENSMUSG00000007039	Ddah2	8.30081e-14	9.12146e-12	-0.566061	0.075824	7.10335	0.099193	0.000948181	0.00288366	0.00767574	0.00767574	46.2765	43.1872	39.2524	72.5623	73.1397	71.8133
ENSMUSG00000020447	Npc1l1	8.34076e-14	9.12388e-12	1.25277	0.167824	4.95548	0.477602	0.00922905	-0.000767168	0.033018	0.033018	2.29384	2.17641	2.03262	0.653711	0.534478	0.658862
ENSMUSG00000064360	mt-Nd3	9.32464e-14	1.01542e-11	-0.475317	0.0637998	9.98628	0.0704311	0.000415213	0.00290135	0.00569041	0.00569041	6049.43	6124.7	6733.76	8772.21	9060.76	9612.77
ENSMUSG00000003031	Cdkn1b	9.89317e-14	1.0725e-11	0.483169	0.0649218	8.72619	0.0750934	0.000220943	0.00610131	0.00496905	0.00610131	153.613	152.772	177.778	92.2883	99.5536	105.701
ENSMUSG00000055725	Paqr3	1.0665e-13	1.15101e-11	1.16384	0.156591	6.98479	0.435785	0.00345908	0.0333219	0.00813206	0.0333219	50.4735	54.8141	62.3695	15.3864	22.6735	14.2971
ENSMUSG00000070570	Slc17a7	1.08203e-13	1.16258e-11	-0.452163	0.0608524	9.8508	0.0632095	5.85079e-05	0.00228427	0.00549601	0.00549601	196.369	198.57	208.36	321.08	328.496	290.054
ENSMUSG00000020263	Appl2	1.11171e-13	1.18919e-11	-0.467064	0.0628881	8.33189	0.0701905	0.000339445	0.00559293	0.00519842	0.00559293	309.026	289.205	285.94	454.38	395.484	484.491
ENSMUSG00000030124	Lag3	1.1566e-13	1.23175e-11	1.31345	0.176975	4.7256	0.5361	0.00819969	0.0149938	0.0387806	0.0387806	9.63808	6.77899	6.66467	1.97775	1.88969	2.06391
ENSMUSG00000040552	C3ar1	1.24552e-13	1.32064e-11	1.3536	0.182627	4.72622	0.566709	0.011265	0.0100323	0.0387638	0.0387638	2.55665	2.06165	2.47708	0.516848	0.712696	0.603398
ENSMUSG00000032101	Ddx25	1.43896e-13	1.51908e-11	0.47189	0.0638321	7.88759	0.0693413	0.000376205	0.00279522	0.0057356	0.0057356	19.6729	19.0416	20.3948	11.5577	13.1431	12.2466
ENSMUSG00000061024	Rrs1	1.44555e-13	1.51939e-11	0.601618	0.0813868	6.7913	0.115717	0.000933153	0.0079841	0.00900257	0.00900257	21.7913	25.5741	27.8229	14.1562	13.7295	12.6847
ENSMUSG00000042331	Specc1	1.59051e-13	1.66453e-11	-0.480629	0.0651315	7.99424	0.0722135	0.00078595	0.00285438	0.00557722	0.00557722	32.8247	36.6641	37.2569	57.3627	58.433	53.4563
ENSMUSG00000078607	1810010H24Rik	1.65952e-13	1.72926e-11	1.01472	0.137614	5.7864	0.331625	0.00666058	0.0217458	0.01738	0.0217458	20.8515	15.0109	20.5705	6.82213	7.53885	5.69555
ENSMUSG00000035226	Rims4	1.75838e-13	1.82441e-11	-0.42817	0.058128	8.90439	0.0573786	0.000132987	0.00284156	0.00493531	0.00493531	40.031	37.1434	40.4716	56.4316	63.1665	58.8595
ENSMUSG00000026220	Slc16a14	1.80381e-13	1.86335e-11	1.23564	0.167827	6.0093	0.491843	0.00633556	0.0359134	0.0147063	0.0359134	20.2147	13.8756	21.5715	6.38513	4.84188	4.65971
ENSMUSG00000026879	Gsn	1.81132e-13	1.86335e-11	-0.483575	0.0656851	7.64822	0.0747679	0.000304886	0.00546298	0.0061669	0.0061669	101.15	103.755	94.726	168.834	142.377	155.999
ENSMUSG00000023019	Gpd1	2.26032e-13	2.31539e-11	-0.61465	0.0838264	7.9642	0.121771	0.000252795	0.0102875	0.00561985	0.0102875	55.0034	54.4422	62.0352	107.69	114.204	90.0117
ENSMUSG00000025140	Pycr1	2.46305e-13	2.51241e-11	1.76382	0.240929	4.41456	1.00297	0.0107404	0.0763298	0.0485549	0.0763298	16.5878	12.7109	18.1851	3.91134	2.50052	2.07954
ENSMUSG00000063524	Eno1	2.78658e-13	2.83048e-11	-0.433954	0.0594106	8.30391	0.0580822	7.12938e-05	0.00191294	0.00522313	0.00522313	382.09	376.089	350.497	540.613	544.006	498.831
ENSMUSG00000049295	Zfp219	2.93967e-13	2.9735e-11	-0.559059	0.0766135	7.02931	0.0964203	0.000850171	0.00247024	0.00795426	0.00795426	57.8649	64.5795	62.6358	100.443	97.6735	107.29
ENSMUSG00000046441	Cmtr2	3.11591e-13	3.13863e-11	0.783423	0.107476	6.69271	0.197987	0.00167701	0.0156496	0.00951018	0.0156496	24.3172	25.8077	25.4515	9.31153	13.3316	11.9251
ENSMUSG00000002032	Tmem25	3.51574e-13	3.52668e-11	-0.634776	0.0872784	7.69646	0.130023	0.000875267	0.010551	0.00607087	0.010551	47.2794	36.5223	40.5806	82.188	76.0638	74.333
ENSMUSG00000042406	Atf4	3.88496e-13	3.88094e-11	0.652237	0.0898459	9.29515	0.137311	7.53466e-05	0.0120331	0.00501093	0.0120331	350.118	356.851	393.913	159.551	200.192	205.713
ENSMUSG00000046699	Slitrk4	4.12623e-13	4.105e-11	-0.497043	0.0685448	7.6165	0.07823	0.00081469	0.00432854	0.0062329	0.0062329	21.6531	22.7111	24.4978	38.1018	40.306	35.2362
ENSMUSG00000054360	Bsx	4.37011e-13	4.32981e-11	4.65904	0.643197	2.00235	6.68582	0.121965	0.0953041	0.498588	0.498588	1.09707	1.18592	0.836873	0	0.0135534	0
ENSMUSG00000001467	Cyp51	4.66682e-13	4.60492e-11	-0.69815	0.0965007	6.11926	0.156393	0.000358293	0.0123527	0.0136103	0.0136103	29.4725	40.3487	33.7328	62.5212	65.4348	65.2833
ENSMUSG00000045932	Ifit2	4.76432e-13	4.68201e-11	0.946589	0.130892	5.52354	0.276513	0.00432913	0.00530013	0.0213698	0.0213698	7.49711	9.7216	8.94177	3.27106	3.24049	3.44729
ENSMUSG00000050963	Kcns2	5.11404e-13	5.00534e-11	0.903876	0.125152	6.9013	0.263893	0.00104261	0.0224519	0.00848775	0.0224519	10.9547	12.9009	14.2541	4.2213	5.74584	5.46418
ENSMUSG00000050663	Trhde	6.44489e-13	6.28246e-11	-0.644703	0.0896575	7.37684	0.134339	0.000533941	0.0115238	0.00681162	0.0115238	11.9877	13.2485	15.762	24.304	27.8005	24.9284
ENSMUSG00000055116	Arntl	7.51194e-13	7.29322e-11	0.512034	0.0714156	7.94378	0.0847738	0.000413879	0.0072364	0.00564969	0.0072364	58.4193	60.9629	56.8159	31.7459	33.5102	40.1099
ENSMUSG00000033594	Spata2l	8.62137e-13	8.33686e-11	-0.783737	0.1096	5.92202	0.188918	0.00233919	0.00346631	0.015679	0.015679	4.48018	5.02436	4.50932	9.562	11.1147	9.48834
ENSMUSG00000074570	Cass4	8.73922e-13	8.38376e-11	2.46871	0.345321	4.31635	1.97145	0.0325075	0.146362	0.0523829	0.146362	2.66626	2.70871	3.98871	0.306882	0.141624	0.393727
ENSMUSG00000071658	Gng3	8.70811e-13	8.38376e-11	-0.441399	0.0617383	8.09514	0.0622421	0.000272347	0.00446782	0.00544508	0.00544508	70.4457	63.9768	59.6181	93.2977	100.438	101.311
ENSMUSG00000026656	Fcgr2b	9.24529e-13	8.83419e-11	1.214	0.169997	4.87066	0.463211	0.00830221	0.018039	0.0350463	0.0350463	9.17052	7.1794	7.22232	1.93181	2.76646	2.18531
ENSMUSG00000030738	Eif3c	9.78467e-13	9.31277e-11	0.872704	0.122339	8.08731	0.246444	0.000188164	0.022262	0.00545473	0.022262	267.874	299.136	393.835	122.748	140.184	118.472
ENSMUSG00000011752	Pgam1	9.97628e-13	9.45791e-11	-0.424168	0.0594836	9.56501	0.0547488	0.000119915	0.00084663	0.00518754	0.00518754	266.484	274.842	256.793	400.579	411.527	386.543
ENSMUSG00000086290	Snhg12	1.0328e-12	9.75306e-11	0.666002	0.0934601	6.55071	0.139334	0.00277429	0.00505881	0.0103279	0.0103279	62.0773	65.0121	63.3628	28.1553	30.6108	36.158
ENSMUSG00000006435	Neurl1a	1.06602e-12	1.00276e-10	-0.545815	0.0766411	8.15274	0.0964228	0.000271917	0.00853886	0.00537707	0.00853886	23.8916	23.5482	22.273	41.5942	43.7167	34.3607
ENSMUSG00000033849	B3galt2	1.27291e-12	1.19274e-10	-0.738581	0.104066	7.21058	0.176646	0.000919554	0.0153251	0.00730778	0.0153251	5.52914	6.096	4.58173	9.98419	11.5909	12.6097
ENSMUSG00000110702	Gm45767	1.37243e-12	1.28102e-10	1.07491	0.151678	5.8798	0.374238	0.00511132	0.029398	0.0161834	0.029398	4.31718	4.85155	5.77598	1.3242	2.01419	1.76423
ENSMUSG00000035686	Thrsp	1.61989e-12	1.50618e-10	-0.500863	0.0709055	7.35975	0.0775434	0.000682625	0.0021726	0.00685876	0.00685876	41.2444	38.8106	40.3318	60.2559	67.5157	67.4161
ENSMUSG00000026207	Speg	1.63517e-12	1.51457e-10	-0.668198	0.094612	6.86188	0.137297	0.00476082	-0.000572909	0.00866631	0.00866631	33.1424	33.7706	37.1553	69.7493	64.2658	58.5006
ENSMUSG00000022687	Boc	1.89211e-12	1.74587e-10	-0.460138	0.0653399	8.1583	0.0686411	0.000336779	0.00606718	0.00537078	0.00606718	20.4175	22.3857	24.3034	33.0425	38.0294	34.5709
ENSMUSG00000041617	Ccdc74a	1.93021e-12	1.77425e-10	-0.56282	0.0799524	7.16078	0.102701	0.00169288	0.0078957	0.00747367	0.0078957	92.7591	86.0171	81.6789	163.578	131.853	135.343
ENSMUSG00000004110	Cacna1e	2.02291e-12	1.85242e-10	-0.632485	0.0899323	8.84258	0.129716	0.00186808	0.0102636	0.00494219	0.0102636	40.8172	40.8039	49.1601	76.4711	91.8816	76.3979
ENSMUSG00000107068	Gm42742	2.15605e-12	1.96689e-10	-0.58838	0.0837671	6.82644	0.111873	0.00169293	0.00832668	0.00883246	0.00883246	78.2122	88.1206	82.3029	134.837	121.859	146.26
ENSMUSG00000005413	Hmox1	2.19395e-12	1.99393e-10	0.998751	0.142241	5.33797	0.32353	0.00372624	0.0266223	0.0247603	0.0266223	14.6627	10.8515	13.8406	5.67573	4.08166	4.29808
ENSMUSG00000024925	Rnaseh2c	2.21001e-12	2.00102e-10	-0.959295	0.136641	5.50064	0.297412	0.006244	0.0204275	0.0217622	0.0217622	8.3626	10.1139	13.042	23.8865	26.7715	27.1491
ENSMUSG00000063632	Sox11	2.27969e-12	2.0564e-10	0.690713	0.0984454	6.29241	0.154755	0.00181318	0.0127241	0.0121276	0.0127241	3.88139	3.80088	4.47107	1.79041	1.96379	2.36814
ENSMUSG00000070327	Rnf213	2.44157e-12	2.19423e-10	1.19222	0.170156	8.11003	0.461157	0.00258287	0.0408466	0.00542699	0.0408466	10.8047	14.6111	15.1116	4.04122	5.09053	3.24469
ENSMUSG00000035964	Tmem59l	3.25766e-12	2.91682e-10	-0.405017	0.0581408	8.88834	0.0507448	0.000133928	0.00178261	0.00493661	0.00493661	235.563	233.334	223.588	314.25	347.501	344.741
ENSMUSG00000031169	Porcn	3.54549e-12	3.16281e-10	-0.423148	0.0608478	8.23676	0.0573082	0.000266484	0.00422344	0.00528719	0.00528719	70.3975	62.5075	59.545	95.3094	96.7169	99.3988
ENSMUSG00000001334	Fndc5	3.65781e-12	3.25101e-10	-0.407578	0.0586459	8.78233	0.0503483	0.000205183	0.000435435	0.00495382	0.00495382	74.9015	76.7247	76.9241	111.711	117.501	110.707
ENSMUSG00000024299	Adamts10	3.8775e-12	3.43365e-10	-0.684302	0.0985803	8.57849	0.152143	0.000691575	0.0138855	0.00502956	0.0138855	34.7425	47.4497	42.1719	80.1967	74.7762	88.8966
ENSMUSG00000048482	Bdnf	3.92107e-12	3.45956e-10	0.95572	0.137712	7.36007	0.296778	0.000656257	0.0277906	0.00685787	0.0277906	27.3616	30.7037	40.6823	11.0786	13.3125	13.4374
ENSMUSG00000042529	Kcnj12	3.99573e-12	3.51261e-10	-0.648781	0.0935203	7.86422	0.13677	0.000381635	0.0127374	0.00577297	0.0127374	29.4421	25.995	31.5068	59.1658	58.7386	47.9783
ENSMUSG00000038615	Nfe2l1	4.79475e-12	4.19975e-10	0.553231	0.0800447	9.20827	0.0995079	0.000923949	0.00868678	0.00497613	0.00868678	161.309	158.781	175.888	95.1952	106.151	82.1264
ENSMUSG00000097248	Gm2694	5.08008e-12	4.4336e-10	-0.658239	0.095351	7.64865	0.140894	0.000889744	0.012748	0.00616603	0.012748	162.062	150.971	149.603	246.297	245.641	318.838
ENSMUSG00000075256	Cerkl	5.31934e-12	4.62572e-10	-1.23496	0.179063	5.36021	0.496015	0.0143665	0.0337289	0.0243285	0.0337289	4.84427	3.03932	5.00513	14.6677	12.2118	15.9227
ENSMUSG00000016252	Atp5e	5.40541e-12	4.65038e-10	-0.470183	0.0681967	7.54329	0.0677817	0.000581973	0.00124335	0.00639422	0.00639422	383.734	380.966	364.249	570.088	540.343	526.863
ENSMUSG00000045114	Prrt2	5.39189e-12	4.65038e-10	-0.630494	0.0914441	7.35614	0.129291	9.79541e-05	0.0124451	0.00686883	0.0124451	130.654	116.614	121.696	189.696	208.105	200.117
ENSMUSG00000031144	Syp	5.38677e-12	4.65038e-10	-0.428582	0.0621585	7.90132	0.0564684	8.14192e-05	0.00162314	0.00571409	0.00571409	483.468	443.155	432.102	546.162	578.833	580.333
ENSMUSG00000031772	Cntnap4	5.89512e-12	5.05371e-10	-0.482219	0.0700679	7.35759	0.0722939	0.000499487	0.00266738	0.00686478	0.00686478	15.5919	16.0806	16.5094	23.9337	27.7301	26.3689
ENSMUSG00000070858	Gm1673	6.01847e-12	5.14122e-10	-1.1912	0.173159	4.82262	0.446963	0.00873457	0.0178633	0.0362415	0.0362415	11.5281	16.4503	12.643	42.695	43.7218	35.0462
ENSMUSG00000020163	Uqcr11	6.13075e-12	5.21869e-10	-0.562087	0.0817393	7.91399	0.1028	0.000512084	0.00950989	0.00569455	0.00950989	347.822	298.326	321.145	509.325	461.306	486.185
ENSMUSG00000011114	Tbrg1	6.21839e-12	5.27472e-10	0.484085	0.070417	7.39234	0.0738549	0.000668236	0.0037734	0.00676959	0.00676959	44.9925	47.8143	52.7541	30.6589	29.8309	28.1044
ENSMUSG00000031227	Magee1	6.24942e-12	5.28251e-10	-0.404932	0.0589091	8.59134	0.0515452	0.0001823	0.00276056	0.00502312	0.00502312	50.852	49.0809	45.3562	70.5664	76.5198	70.1183
ENSMUSG00000039158	Akna	6.34522e-12	5.3448e-10	0.927802	0.135018	5.84716	0.280121	0.00185727	0.0254877	0.0165888	0.0254877	5.62168	5.72733	7.65745	2.48257	2.85162	2.0694
ENSMUSG00000003072	Atp5d	6.96247e-12	5.84436e-10	-0.411688	0.0600267	8.3455	0.0546785	0.000217981	0.00457237	0.00518682	0.00518682	180.927	188.59	205.15	253.309	295.063	279.317
ENSMUSG00000031168	Ebp	7.00859e-12	5.86272e-10	-0.698051	0.101794	6.13908	0.148541	0.00211546	0.000832922	0.0134276	0.0134276	23.0838	23.1002	23.1485	47.9516	41.3767	44.9361
ENSMUSG00000032036	Kirrel3	7.26335e-12	6.05488e-10	-0.403707	0.0589149	8.59041	0.0510149	0.000182881	0.00246837	0.00502358	0.00502358	55.2846	49.9512	55.6291	78.0112	82.4353	78.1735
ENSMUSG00000040938	Slc16a11	7.29934e-12	6.06397e-10	-0.701811	0.102429	6.78934	0.160351	0.00113753	0.0146001	0.00901222	0.0146001	38.8479	40.9517	35.5277	74.7718	62.0553	81.4396
ENSMUSG00000070304	Scn2b	7.51985e-12	6.22577e-10	-0.5159	0.0753423	9.3418	0.0866575	9.60207e-05	0.00841867	0.00503396	0.00841867	69.8638	79.3087	84.4793	128.558	141.335	118.755
ENSMUSG00000043670	Diras1	8.04494e-12	6.63776e-10	-0.454638	0.0664894	7.6284	0.0659284	0.0004234	0.00447639	0.00620786	0.00620786	37.4266	35.044	32.1578	50.7452	54.643	56.048
ENSMUSG00000056608	Chd9	8.27152e-12	6.8015e-10	-0.470695	0.0688778	10.5923	0.0711772	9.58615e-05	0.00579302	0.00702037	0.00702037	645.864	566.094	648.959	903.246	1052.06	1011.36
ENSMUSG00000044933	Sstr3	8.35533e-12	6.84712e-10	-0.766539	0.112193	5.88891	0.191379	0.0023992	0.0164817	0.0160726	0.0164817	3.49098	3.98351	4.08879	7.34913	7.46398	10.0808
ENSMUSG00000073988	Ttpa	8.80139e-12	7.1883e-10	-0.621055	0.090999	6.67177	0.12345	0.00279711	0.00687441	0.00962412	0.00962412	10.0887	11.4535	11.8086	18.7186	20.5275	23.0086
ENSMUSG00000001123	Lgals9	9.30983e-12	7.57795e-10	0.832066	0.122061	5.63965	0.224621	0.00285679	0.0182939	0.0194916	0.0194916	13.9445	15.8832	14.9778	7.10786	7.1169	5.24176
ENSMUSG00000024213	Nudt3	9.37598e-12	7.60618e-10	-0.475387	0.069748	7.57909	0.0724344	0.000983444	0.0048124	0.00631374	0.00631374	247.196	232.276	239.145	327.054	281.938	333.962
ENSMUSG00000024621	Csf1r	9.47017e-12	7.6569e-10	0.558245	0.0819222	7.60859	0.101545	0.000570746	0.00949613	0.00624971	0.00949613	25.5997	21.1058	20.9473	12.3315	13.9652	11.9947
ENSMUSG00000022043	Trim35	9.54934e-12	7.69518e-10	0.428079	0.0628314	7.86216	0.0591038	0.000145369	0.00501511	0.0057763	0.0057763	107.987	103.135	116.191	71.2707	74.3889	62.9019
ENSMUSG00000039166	Akap7	1.00002e-11	8.03172e-10	-0.514803	0.0756341	7.07119	0.0843889	0.000786611	0.00531615	0.00779416	0.00779416	70.8926	66.4679	69.2437	98.3868	106.961	121.838
ENSMUSG00000031840	Rab3a	1.07508e-11	8.606e-10	-0.398206	0.0585935	9.38859	0.0500255	8.96353e-05	0.00297938	0.00506016	0.00506016	331.332	321.972	288.207	459.299	471.077	445.488
ENSMUSG00000022523	Fgf12	1.17967e-11	9.41203e-10	-0.405458	0.0597785	8.54487	0.051667	0.000312667	0.00262245	0.00504753	0.00504753	136.449	135.581	142.381	193.586	203.067	220.649
ENSMUSG00000000088	Cox5a	1.4178e-11	1.12748e-09	-0.478538	0.0708307	8.09561	0.0747199	0.000319911	0.00720558	0.0054445	0.00720558	323.809	339.3	304.089	439.825	491.415	552.624
ENSMUSG00000005045	Chd5	1.4392e-11	1.14074e-09	1.10397	0.163457	8.00292	0.397689	0.000613739	0.0394636	0.00556519	0.0394636	21.8249	19.9956	15.714	4.8823	6.6652	7.53052
ENSMUSG00000007036	Abhd16a	1.48115e-11	1.17016e-09	-0.479023	0.0709692	7.31635	0.0711227	0.000572611	0.00228201	0.00698233	0.00698233	148.653	137.719	136.963	200.875	197.307	210.193
ENSMUSG00000030669	Calca	1.4876e-11	1.17143e-09	2.04071	0.302367	3.49269	1.28652	0.0281741	0.018296	0.108965	0.108965	12.0262	15.1202	11.3233	1.78857	1.74329	1.06542
ENSMUSG00000039313	Minar1	1.53494e-11	1.20478e-09	0.840658	0.124642	6.30798	0.230655	0.00159285	0.0217108	0.012006	0.0217108	6.66739	6.35144	7.91145	2.46529	3.18713	3.43821
ENSMUSG00000021895	Arhgef3	1.58362e-11	1.23896e-09	-0.436957	0.0648303	8.05613	0.0598473	0.000810265	0.00239945	0.00549418	0.00549418	29.0133	32.1292	31.9709	50.658	45.07	47.3748
ENSMUSG00000030774	Pak1	1.67029e-11	1.30256e-09	-0.395567	0.0587568	9.40107	0.0490673	0.000110872	0.0025457	0.00506767	0.00506767	258.712	248.252	252.259	345.269	375.794	393.421
ENSMUSG00000035305	Ror1	1.7024e-11	1.32073e-09	-1.16858	0.17365	5.52637	0.445858	0.00565281	0.0395786	0.0213218	0.0395786	1.05008	1.15411	0.876524	4.07239	3.61352	2.44553
ENSMUSG00000004455	Ppp1cc	1.70998e-11	1.32073e-09	-0.468389	0.069609	8.72772	0.071631	0.000446931	0.00682119	0.00496858	0.00682119	297.754	262.43	248.655	386.082	402.544	446.039
ENSMUSG00000036751	Cox6b1	1.70548e-11	1.32073e-09	-0.530867	0.0788896	7.32681	0.0920143	0.000220536	0.00911482	0.00695205	0.00911482	393.102	430.304	371.689	583.995	591.574	659.728
ENSMUSG00000028560	Usp1	2.21168e-11	1.70279e-09	0.459454	0.0686641	7.44437	0.0654391	0.000438769	0.00219847	0.00663337	0.00663337	53.3483	52.2107	58.1075	32.5344	34.9432	34.1893
ENSMUSG00000096862	Gm13301	2.29898e-11	1.76438e-09	-3.89733	0.582939	3.98817	4.96453	0.182463	0.327265	0.0692471	0.327265	0.396827	0.0589132	0.0689766	6.63561	5.25246	7.04464
ENSMUSG00000034891	Sncb	2.31902e-11	1.77413e-09	-0.727306	0.108807	8.00145	0.172899	0.000290906	0.0174675	0.00556722	0.0174675	157.949	138.292	109.37	262.07	270.627	256.305
ENSMUSG00000027581	Stmn3	2.56479e-11	1.95596e-09	-0.392114	0.0587911	9.44891	0.0500521	8.60184e-05	0.00482161	0.00509857	0.00509857	473.056	454.494	407.848	610.302	611.133	669.719
ENSMUSG00000040354	Mars	2.73779e-11	2.08132e-09	0.796341	0.11957	8.18077	0.207404	0.00121618	0.0202294	0.00534587	0.0202294	132.999	130.641	120.855	53.2223	48.2582	71.8276
ENSMUSG00000041697	Cox6a1	2.98432e-11	2.26163e-09	-0.389496	0.0585943	8.78722	0.0475761	0.00019724	0.0023826	0.0049527	0.0049527	582.693	555.831	567.474	711.013	768.084	782.46
ENSMUSG00000033578	Tmem35a	3.03839e-11	2.29541e-09	-0.42882	0.0645357	7.81683	0.0598757	0.000395499	0.0054917	0.00585178	0.00585178	48.1247	48.7444	48.0266	71.6099	81.8095	66.6698
ENSMUSG00000001383	Zmat2	3.28397e-11	2.47321e-09	-0.416385	0.0627725	8.03835	0.0530848	0.000393203	0.000946563	0.00551738	0.00551738	46.6078	50.8031	46.8847	72.1341	71.7522	71.625
ENSMUSG00000018727	Cpsf4l	3.71364e-11	2.78812e-09	-0.970613	0.146727	5.25398	0.288433	0.00584119	0.00141604	0.0264522	0.0264522	4.00645	4.73435	4.60928	11.0756	12.692	11.1771
ENSMUSG00000025137	Pcyt2	3.7545e-11	2.81006e-09	-0.54834	0.0829128	7.51726	0.0984525	0.00040717	0.00990463	0.00645472	0.00990463	105.87	102.224	95.3258	170.55	144.257	184.329
ENSMUSG00000036242	Armh4	3.87935e-11	2.89455e-09	-0.449136	0.0679622	8.54091	0.0660596	0.00018555	0.00674274	0.00504975	0.00674274	51.2424	53.0392	62.6396	82.8723	87.276	87.9666
ENSMUSG00000074896	Ifit3	4.1172e-11	3.06256e-09	1.43733	0.217784	6.70092	0.676689	0.00171298	0.0694316	0.00946615	0.0694316	37.9293	51.2294	42.7365	11.2673	13.4634	6.91252
ENSMUSG00000033159	Cnppd1	4.18499e-11	3.10344e-09	0.52124	0.0790071	7.19292	0.0874078	0.00199754	0.00537819	0.00736565	0.00736565	50.6215	48.5452	54.6236	27.3183	33.3917	27.8885
ENSMUSG00000023393	Slc17a9	4.265e-11	3.1531e-09	2.72801	0.413676	2.86911	2.38754	0.0527976	0.140862	0.203894	0.203894	7.05691	4.74093	3.57421	0.185843	0.451553	0.306841
ENSMUSG00000023011	Faim2	4.86141e-11	3.58307e-09	-0.563992	0.0857766	9.30893	0.104255	0.000485549	0.0105509	0.00501741	0.0105509	120.976	111.955	95.5926	183.291	208.611	175.18
ENSMUSG00000041528	Rnf123	5.09326e-11	3.74254e-09	-0.566695	0.0862788	6.88981	0.101526	0.00262697	0.00385113	0.00853908	0.00853908	57.1931	52.305	49.4209	87.6366	82.0677	98.0399
ENSMUSG00000073418	C4b	6.73236e-11	4.93197e-09	1.25523	0.192329	4.80899	0.517071	0.00386483	0.0516206	0.0365875	0.0516206	16.9308	14.7371	17.7338	3.15669	5.83436	4.7878
ENSMUSG00000037894	H2afz	7.29115e-11	5.32518e-09	0.395044	0.0606404	8.24895	0.0481812	0.00024082	0.00146314	0.00527506	0.00527506	394.067	359.803	376.761	242.188	255.875	236.187
ENSMUSG00000046718	Bst2	7.62506e-11	5.55229e-09	1.14026	0.175214	5.10896	0.426898	0.00481804	0.0412319	0.0295541	0.0412319	30.3986	38.6639	25.9287	9.89679	11.4529	7.25652
ENSMUSG00000019370	Calm3	7.86677e-11	5.71109e-09	-0.408982	0.06289	8.14002	0.0549259	4.32136e-05	0.00588951	0.00539163	0.00588951	414.185	367.311	362.665	512.391	521.417	558.011
ENSMUSG00000045725	Prr15	8.24904e-11	5.97068e-09	1.73074	0.266432	4.68081	0.983822	0.0181778	0.0883014	0.0400187	0.0883014	8.37907	5.4053	4.92679	1.15916	0.696584	1.4857
ENSMUSG00000002010	Idh3g	8.87499e-11	6.40456e-09	-0.425966	0.0656851	7.62555	0.0559798	0.000257967	0.00167422	0.00621383	0.00621383	143.177	144.718	144.472	199.2	200.182	221.182
ENSMUSG00000084803	5830444B04Rik	8.9694e-11	6.45343e-09	-0.691712	0.10669	6.1336	0.144888	0.00359645	-0.0019109	0.0134777	0.0134777	6.77147	7.26354	6.39708	13.5629	13.3534	13.4545
ENSMUSG00000047013	Fbxo41	1.08959e-10	7.81624e-09	-0.401822	0.0622596	8.05067	0.0511931	0.000313142	0.00313056	0.00550125	0.00550125	14.0709	12.9592	13.0801	19.3774	21.4158	18.9609
ENSMUSG00000083626	Gm4459	1.11826e-10	7.99824e-09	-5.31662	0.824277	2.47537	8.82856	0.712137	-0.276337	0.307013	0.307013	0	0	0.371352	22.3657	40.9567	33.841
ENSMUSG00000071855	Ccdc112	1.12323e-10	8.01009e-09	0.638979	0.0990763	6.19066	0.129093	0.00175578	0.00650083	0.0129684	0.0129684	10.9294	13.3501	13.5472	6.40257	6.65295	6.69403
ENSMUSG00000049044	Rapgef4	1.20538e-10	8.57062e-09	-0.483049	0.0750233	7.01971	0.0711365	0.00045082	0.00096884	0.00799191	0.00799191	92.752	84.7183	86.758	126.902	132.96	132.035
ENSMUSG00000038508	Gdf15	1.25377e-10	8.88856e-09	5.02877	0.781753	4.23702	8.31991	0.119505	0.797203	0.0558312	0.797203	17.1836	22.0769	34.5566	0.541748	0.148559	0.0269733
ENSMUSG00000030683	Sez6l2	1.47812e-10	1.04484e-08	-0.379456	0.0592196	8.40697	0.047162	0.000122637	0.00483466	0.0051378	0.0051378	131.702	122.59	128.991	184.726	197.478	162.003
ENSMUSG00000093989	Rnasek	1.51019e-10	1.0644e-08	-0.407572	0.06364	7.93446	0.053314	0.00041152	0.00393778	0.00566356	0.00566356	277.402	238.22	241.111	369.448	364.783	330.268
ENSMUSG00000078651	Aoc2	1.56598e-10	1.10051e-08	0.911924	0.142515	5.57864	0.273854	0.00344811	0.0270176	0.0204553	0.0270176	5.01185	7.56311	7.56193	2.42522	2.58924	2.83066
ENSMUSG00000016346	Kcnq2	1.66952e-10	1.16988e-08	-0.40876	0.0639784	7.95996	0.0531824	0.000513874	0.0033075	0.00562599	0.00562599	30.4344	34.7129	31.2124	51.1788	49.4015	49.2361
ENSMUSG00000075470	Alg10b	1.92193e-10	1.34285e-08	0.398505	0.0625847	8.56916	0.0523422	0.00015801	0.00571726	0.00503439	0.00571726	43.9189	45.0547	51.4413	30.7702	33.2722	30.3631
ENSMUSG00000025425	St8sia5	1.99293e-10	1.38845e-08	-0.479609	0.0753879	8.42975	0.0758275	0.000214324	0.00831068	0.00512103	0.00831068	76.4017	74.1082	90.5855	131.591	134.469	118.555
ENSMUSG00000029059	Fam213b	2.02474e-10	1.40656e-08	-0.609908	0.0959057	6.2048	0.116421	0.000950321	0.00508042	0.0128465	0.0128465	62.8353	52.9446	54.7423	86.9581	89.6872	74.5729
ENSMUSG00000033595	Lgi3	2.03126e-10	1.40704e-08	-0.46517	0.0731519	8.7835	0.0713364	0.000308608	0.0077182	0.00495355	0.0077182	69.6156	62.9677	54.8273	96.6033	95.6698	103.565
ENSMUSG00000026158	Ogfrl1	2.05214e-10	1.41673e-08	-0.396751	0.0624079	8.20656	0.0500097	0.00052388	0.00295882	0.00531825	0.00531825	65.9716	61.8198	65.437	81.9039	97.421	93.4977
ENSMUSG00000037362	Nov	2.05697e-10	1.41673e-08	0.953058	0.149922	6.80329	0.299468	0.00116464	0.0325502	0.0089439	0.0325502	27.978	25.1877	19.9017	10.6333	10.1137	7.4034
ENSMUSG00000028369	Svep1	2.06735e-10	1.41984e-08	-1.08956	0.171415	5.60864	0.391402	0.00131814	0.0427567	0.0199751	0.0427567	1.97145	1.65291	2.56505	6.37316	7.05719	4.81225
ENSMUSG00000063873	Slc24a3	2.13163e-10	1.45983e-08	-0.439607	0.0692125	7.88964	0.0637246	0.000190139	0.00699542	0.00573236	0.00699542	57.3968	48.7762	47.8689	75.7841	83.9545	74.6535
ENSMUSG00000015243	Abca1	2.17563e-10	1.48576e-08	0.938648	0.147856	7.94882	0.290552	0.00175037	0.0310416	0.00564226	0.0310416	39.1878	27.6711	34.9904	12.0456	16.0914	11.7335
ENSMUSG00000031996	Aplp2	2.37707e-10	1.61875e-08	-0.386797	0.0610594	9.86316	0.0482573	7.99713e-05	0.0041373	0.0055124	0.0055124	494.833	485.604	557.117	765.981	762.44	701.599
ENSMUSG00000034926	Dhcr24	2.56784e-10	1.74375e-08	-0.689737	0.109086	7.88068	0.157001	0.000378228	0.0174716	0.00574655	0.0174716	14.802	19.2052	15.583	35.7002	34.8647	27.9165
ENSMUSG00000038020	Rapgefl1	2.78236e-10	1.88413e-08	-0.499675	0.0791822	7.00915	0.0786614	0.00137095	0.00332765	0.00803378	0.00803378	15.7332	14.5825	15.7112	22.7395	26.2373	25.9722
ENSMUSG00000039347	Atp6v0e2	2.83081e-10	1.91159e-08	-0.366487	0.0581009	9.18784	0.0429832	9.41129e-05	0.00326754	0.00496947	0.00496947	222.174	206.996	190.369	280.712	297.541	295.52
ENSMUSG00000025757	Hspa4l	2.84211e-10	1.91387e-08	-0.401251	0.0636184	8.0784	0.0531574	0.000344695	0.00572625	0.00546585	0.00572625	101.066	112.448	118.961	143.397	162.422	162.553
ENSMUSG00000055629	B4galnt4	3.00482e-10	2.01782e-08	0.539901	0.0857186	6.74791	0.0913495	0.00180116	0.00307586	0.00922035	0.00922035	74.4201	63.8358	66.4449	36.8226	36.7476	40.5102
ENSMUSG00000021948	Prkcd	3.22406e-10	2.15905e-08	-0.399426	0.063526	8.06697	0.0485173	0.000573037	0.000245639	0.00548029	0.00548029	56.0586	56.1786	52.227	79.4736	81.0732	79.9025
ENSMUSG00000002416	Ndufb2	3.40428e-10	2.27344e-08	-0.474763	0.0756094	7.15186	0.0707418	0.00107089	0.00283151	0.00750427	0.00750427	127.348	137.777	150.08	249.534	242.446	247.688
ENSMUSG00000021474	Sfxn1	3.775e-10	2.51407e-08	0.390779	0.0623943	8.12224	0.0479302	0.000427139	0.00222009	0.00541242	0.00541242	47.5837	47.5174	52.7599	33.7961	33.9516	31.7644
ENSMUSG00000026797	Stxbp1	4.01898e-10	2.6692e-08	-0.404454	0.0646786	10.2816	0.0515024	3.90474e-05	0.00299544	0.00623593	0.00623593	274.565	248.157	246.391	379.395	400.517	363.771
ENSMUSG00000040258	Nxph4	4.64929e-10	3.07936e-08	0.59461	0.0954352	6.42477	0.116998	0.00173294	0.0119289	0.0111502	0.0119289	19.6718	17.8911	19.8896	8.6687	11.4486	11.0711
ENSMUSG00000038683	Pak1ip1	4.74927e-10	3.13698e-08	0.512977	0.0823772	7.66495	0.0870869	0.000468011	0.00971101	0.00613302	0.00971101	72.6575	78.9107	76.7595	38.7866	50.2473	47.0274
ENSMUSG00000031065	Cdk16	4.82855e-10	3.18066e-08	-0.369288	0.0593273	8.43554	0.0430014	0.000162716	0.00244907	0.00511688	0.00511688	255.344	226.623	243.951	326.109	323	344.699
ENSMUSG00000046157	Tmem229b	4.91456e-10	3.22852e-08	-0.519459	0.0834901	8.77435	0.0893161	0.000706213	0.00974968	0.00495573	0.00974968	48.5837	46.1229	55.327	81.9994	92.9239	75.3451
ENSMUSG00000040618	Pck2	5.20759e-10	3.41175e-08	0.682721	0.109891	7.33963	0.154323	0.00199683	0.0161172	0.00691537	0.0161172	48.9509	45.0765	44.0016	19.9648	21.3904	28.4299
ENSMUSG00000031070	Mrgprf	5.34478e-10	3.49216e-08	-0.599674	0.0965871	6.63255	0.119077	0.00136479	0.0126288	0.00984343	0.0126288	9.0631	11.7373	10.9978	20.6185	19.7459	16.4728
ENSMUSG00000048481	Mypop	5.48336e-10	3.57305e-08	-0.545637	0.0879406	6.6316	0.0918879	0.00175148	0.00146347	0.00984884	0.00984884	10.4616	10.9381	9.96809	17.4794	16.8823	18.839
ENSMUSG00000107045	Gm43636	5.53619e-10	3.59778e-08	3.11722	0.502527	2.84692	3.09959	0.170143	0.060443	0.208656	0.208656	1.44345	1.51273	1.9394	0.038521	0.0393456	0.142121
ENSMUSG00000028527	Ak4	5.96684e-10	3.85691e-08	-0.771715	0.124645	6.75211	0.197307	0.000614632	0.0226899	0.00919889	0.0226899	37.5846	49.3614	52.9607	93.8799	109.39	85.8985
ENSMUSG00000037386	Rims2	5.96046e-10	3.85691e-08	-0.395697	0.06391	7.85372	0.0511181	0.000336637	0.00484499	0.00579009	0.00579009	83.6254	76.184	88.7251	119.336	128.544	113.343
ENSMUSG00000020641	Rsad2	6.24586e-10	4.0265e-08	1.51652	0.245229	5.19543	0.762115	0.0133445	0.0768615	0.0276868	0.0768615	3.28762	5.27379	5.65848	0.809389	1.41023	0.890901
ENSMUSG00000112332	4930466K18Rik	6.55889e-10	4.21705e-08	0.600806	0.0972749	6.29086	0.119645	0.00184143	0.0123522	0.0121397	0.0123522	54.1304	64.7323	67.6131	30.0356	32.3545	37.5027
ENSMUSG00000003992	Ssbp2	6.57848e-10	4.21843e-08	0.48027	0.0777651	6.92177	0.0698143	0.000673379	9.7257e-05	0.00839774	0.00839774	90.3571	93.517	89.7467	52.4086	55.8421	53.0973
ENSMUSG00000043631	Ecm2	6.76335e-10	4.3255e-08	0.502428	0.0814106	7.32609	0.0836832	0.000773895	0.00916762	0.00695412	0.00916762	18.8661	20.4079	23.6055	13.296	12.9402	11.5818
ENSMUSG00000049097	Ankrd34a	7.21804e-10	4.60412e-08	-0.418537	0.0679308	7.54362	0.0539591	0.000528432	0.0012304	0.00639345	0.00639345	19.7182	20.7884	20.3403	29.4223	32.4588	29.3257
ENSMUSG00000059325	Hopx	7.35063e-10	4.67636e-08	-0.367309	0.0596441	8.48656	0.0438831	0.000253701	0.00400669	0.00508242	0.00508242	180.6	166.399	181.397	263.858	250.676	224.057
ENSMUSG00000021392	Nol8	7.7155e-10	4.8956e-08	0.484934	0.0788424	7.26733	0.0780075	0.00054458	0.0087796	0.00712876	0.0087796	27.15	28.8624	34.069	17.7104	18.069	19.3961
ENSMUSG00000031150	Ccdc120	8.08802e-10	5.11853e-08	-1.23766	0.201469	4.35742	0.470707	0.0101571	0.00379875	0.0507276	0.0507276	15.0049	12.6038	12.7273	48.9528	42.211	36.1152
ENSMUSG00000033967	Rnf225	8.15201e-10	5.14556e-08	1.09978	0.17906	5.66026	0.401327	0.00412546	0.0439683	0.0191776	0.0439683	5.07466	5.74226	7.6494	1.57857	2.47985	2.06685
ENSMUSG00000045136	Tubb2b	8.69313e-10	5.47283e-08	-0.416369	0.0679041	7.91767	0.0575421	0.000315759	0.00660068	0.00568892	0.00660068	72.8037	81.6396	79.3626	120.126	126.43	104.067
ENSMUSG00000040537	Adam22	8.81361e-10	5.53426e-08	-0.441868	0.0720883	7.16278	0.0607651	0.000328251	0.00241044	0.00746683	0.00746683	84.3832	84.4258	88.5321	122.41	136.231	117.426
ENSMUSG00000017778	Cox7c	8.92334e-10	5.58865e-08	-0.38463	0.0627705	7.96738	0.0482769	0.000294941	0.00457357	0.00561526	0.00561526	460.085	441.92	437.455	567.284	568.623	665.024
ENSMUSG00000030729	Pgm2l1	9.30492e-10	5.81257e-08	-0.532021	0.0869188	8.3385	0.0939798	0.00013605	0.0111963	0.00519275	0.0111963	46.522	47.177	48.5763	80.5225	92.6368	70.4681
ENSMUSG00000034187	Nsf	1.00119e-09	6.23806e-08	-0.378116	0.0618927	7.91632	0.045776	5.50724e-05	0.00355049	0.00569098	0.00569098	202.793	190.737	170.075	251.557	263.481	257.956
ENSMUSG00000074818	Pdzd7	1.054e-09	6.55026e-08	1.24797	0.204552	6.4096	0.51744	0.00495627	0.0578058	0.011256	0.0578058	9.39541	8.9705	11.4052	1.98715	2.91631	3.80338
ENSMUSG00000067212	H2-T23	1.06985e-09	6.63173e-08	0.593401	0.0973009	6.35322	0.111812	0.00253812	0.00517964	0.0116631	0.0116631	18.0874	18.8824	16.3114	10.7442	9.15857	8.95418
ENSMUSG00000061518	Cox5b	1.0792e-09	6.67254e-08	-0.421585	0.0691436	7.63458	0.0543209	0.000976256	0.000274706	0.006195	0.006195	284.419	264.584	263.777	387.258	374.583	385.597
ENSMUSG00000036564	Ndrg4	1.08269e-09	6.67704e-08	-0.360972	0.0592076	9.53172	0.0432969	4.6151e-05	0.00521216	0.00515997	0.00521216	677.646	611.459	562.101	834.216	813.033	848.685
ENSMUSG00000031824	6430548M08Rik	1.13792e-09	6.99979e-08	-0.416545	0.0684122	8.18484	0.0576693	0.000111954	0.00690839	0.00534144	0.00690839	64.4581	61.2958	71.2175	99.4466	106.047	89.1346
ENSMUSG00000049939	Lrrc4	1.29837e-09	7.96651e-08	-0.44419	0.0732068	7.43324	0.0656224	0.000424421	0.00761444	0.00666188	0.00761444	25.0269	24.3031	29.3918	40.3038	42.7867	37.6975
ENSMUSG00000052160	Pld4	1.31545e-09	8.0509e-08	1.27682	0.210505	4.27219	0.503773	0.0122093	0.00615656	0.0542594	0.0542594	12.7003	9.59916	9.06875	3.24245	3.08936	3.13525
ENSMUSG00000020704	Asic2	1.39984e-09	8.54572e-08	-0.387761	0.0640346	7.86646	0.0497403	0.000381286	0.00540956	0.00576935	0.00576935	29.2405	25.1995	24.945	36.9139	40.9716	37.5308
ENSMUSG00000006575	Rundc3a	1.40778e-09	8.57256e-08	-0.400293	0.0661139	8.97946	0.0533155	0.000568175	0.0059884	0.00493384	0.0059884	192.954	177.62	202.017	268.021	253.794	301.31
ENSMUSG00000058740	Kcnt1	1.42677e-09	8.66639e-08	-0.458674	0.0757834	9.211	0.0700063	0.000542664	0.00807203	0.00497707	0.00807203	83.9616	86.7833	69.5696	134.306	119.417	122.219
ENSMUSG00000028937	Acot7	1.47749e-09	8.95198e-08	-0.352326	0.0582665	8.90739	0.0396425	0.000157365	0.00284574	0.00493511	0.00493511	186.124	195.252	174.462	247.33	255.172	273.921
ENSMUSG00000015837	Sqstm1	1.52293e-09	9.20422e-08	0.359058	0.0594278	8.40533	0.0398113	0.000158458	0.00125968	0.00513904	0.00513904	292.625	275.062	301.187	193.194	204.506	197.237
ENSMUSG00000024601	Isoc1	1.53655e-09	9.26337e-08	0.449988	0.0744954	7.15265	0.0619455	0.000822799	0.000675637	0.00750155	0.00750155	30.0985	30.7683	28.5567	18.2722	19.7402	18.9246
ENSMUSG00000014846	Tppp3	1.67798e-09	1.00909e-07	-0.433471	0.0719303	7.45416	0.0625778	0.000930685	0.00683027	0.00660855	0.00683027	56.1708	53.1411	46.5871	71.7213	77.2935	83.1812
ENSMUSG00000009470	Tnpo1	1.69922e-09	1.01932e-07	0.509164	0.0845195	7.89448	0.0863468	0.00016439	0.0105509	0.00572476	0.0105509	50.3668	52.0947	64.2985	34.1472	33.8281	31.3984
ENSMUSG00000022269	March11	1.76122e-09	1.0539e-07	-0.708362	0.117699	6.10717	0.155438	0.00705562	-0.000924165	0.0137239	0.0137239	10.4147	9.77999	9.83111	18.8703	18.6171	22.4701
ENSMUSG00000027489	Necab3	1.80703e-09	1.07864e-07	-0.800911	0.133168	6.39284	0.213718	0.00145452	0.0251462	0.0113747	0.0251462	55.2501	51.7153	65.2085	102.008	98.2853	144.93
ENSMUSG00000034855	Cxcl10	1.86893e-09	1.11284e-07	3.00447	0.500011	4.02717	3.00807	0.105135	0.269882	0.0668861	0.269882	6.76397	14.9449	10.7921	0.32822	0.281483	1.18424
ENSMUSG00000028266	Lmo4	1.88894e-09	1.122e-07	0.498559	0.0829953	7.1381	0.0828342	0.000907478	0.00942484	0.00755205	0.00942484	66.9207	55.9843	61.5941	36.6355	32.4206	40.6416
ENSMUSG00000098051	Gm27032	1.98111e-09	1.17385e-07	-0.729231	0.121552	5.90124	0.177263	0.00268568	0.0194765	0.0159245	0.0194765	10.2616	8.48282	9.64863	17.3978	16.884	23.0901
ENSMUSG00000027257	Pacsin3	2.00803e-09	1.1869e-07	-0.484223	0.0807422	7.0575	0.0734115	0.0019332	0.00190404	0.00784575	0.00784575	77.5189	72.2393	71.906	113.233	104.834	118.664
ENSMUSG00000027977	Ndst3	2.02665e-09	1.19498e-07	-0.363508	0.0606285	8.41267	0.0430752	0.000380184	0.00391209	0.00513354	0.00513354	47.665	55.2581	55.3596	74.3293	77.4123	74.2555
ENSMUSG00000038332	Sesn1	2.08289e-09	1.22516e-07	-0.364939	0.0609125	8.26009	0.0418956	0.000301331	0.00212541	0.00526416	0.00526416	56.3065	57.9981	59.0823	77.5152	87.2271	83.0517
ENSMUSG00000041351	Rap1gap	2.1239e-09	1.24624e-07	-0.382406	0.0638618	7.99381	0.0446758	0.000539668	0.000467033	0.00557782	0.00557782	94.0909	93.1229	88.143	129.708	134.254	131.294
ENSMUSG00000044288	Cnr1	2.23801e-09	1.31002e-07	-0.370447	0.0619527	9.99695	0.0450455	5.00809e-05	0.00479522	0.00570712	0.00570712	138.182	141.725	154.777	212.03	223.149	197.025
ENSMUSG00000052253	Zfp622	2.24816e-09	1.31278e-07	0.564606	0.0944349	7.34351	0.106335	0.00209022	0.0112867	0.00690435	0.0112867	39.6276	46.1441	51.0542	27.8874	25.8178	22.874
ENSMUSG00000031239	Itm2a	2.28027e-09	1.32833e-07	0.365198	0.061106	8.1987	0.0434573	0.000274356	0.00403369	0.00532655	0.00532655	127.961	137.465	147.146	92.6518	89.7705	99.5176
ENSMUSG00000066315	Gm12918	2.3079e-09	1.34119e-07	0.672376	0.112541	6.9734	0.150825	0.00958979	0.00940839	0.00817884	0.00940839	168.613	151.11	158.129	71.8219	64.0459	92.1416
ENSMUSG00000070493	Chchd2	2.33447e-09	1.35337e-07	-0.349912	0.0585859	9.33326	0.0397138	0.000118942	0.00360881	0.00502951	0.00502951	287.956	341.437	310.564	425.73	444.411	431.419
ENSMUSG00000022865	Cxadr	2.43557e-09	1.40861e-07	0.59491	0.0997214	6.09301	0.109953	0.00105736	0.00366473	0.0138592	0.0138592	34.0988	31.2755	34.6503	19.0234	16.4325	18.4416
ENSMUSG00000019312	Grb7	2.53511e-09	1.46268e-07	-0.966427	0.162175	4.96765	0.296051	0.00671633	0.013105	0.0327345	0.0327345	2.28077	2.05777	2.32107	6.37865	4.43299	5.98878
ENSMUSG00000072235	Tuba1a	2.56853e-09	1.47843e-07	-0.400549	0.0672397	10.4969	0.0517865	2.79017e-05	0.00454024	0.00675387	0.00675387	676.526	760.163	653.874	950.859	1008.25	1104.95
ENSMUSG00000052776	Oas1a	2.60223e-09	1.49236e-07	1.22485	0.205687	4.36359	0.484747	0.0129749	0.0303653	0.0504858	0.0504858	2.49506	3.59429	3.80455	1.13825	0.903241	0.785524
ENSMUSG00000022321	Cdh10	2.60507e-09	1.49236e-07	0.452075	0.0759187	7.11848	0.0638276	0.00102409	0.00212098	0.00762138	0.00762138	22.1052	23.8707	23.5855	12.9639	14.9112	14.6881
ENSMUSG00000074736	Syndig1	2.61323e-09	1.49349e-07	-0.485324	0.0815093	6.68633	0.0744111	0.000420949	0.00426579	0.00954469	0.00954469	70.0802	69.6989	81.3846	114.774	106.467	106.599
ENSMUSG00000000732	Icosl	2.70417e-09	1.54182e-07	0.743166	0.124931	6.23061	0.184418	0.00198285	0.0214287	0.0126283	0.0214287	15.034	13.158	15.2302	5.93413	8.47946	6.09919
ENSMUSG00000016194	Hsd11b1	2.76803e-09	1.56715e-07	-0.412784	0.0694362	7.44649	0.0568667	0.000604105	0.00658287	0.00662796	0.00662796	65.0718	51.7947	56.5039	88.0092	85.5587	80.0144
ENSMUSG00000027435	Cd93	2.76395e-09	1.56715e-07	0.688677	0.115841	7.0034	0.158386	0.00103862	0.01909	0.00805676	0.01909	7.33847	10.0876	10.2856	4.85983	4.30031	4.58166
ENSMUSG00000031530	Dusp4	2.76484e-09	1.56715e-07	0.816039	0.137265	6.40771	0.222386	0.00199882	0.0262637	0.0112693	0.0262637	12.3315	12.4366	14.3283	5.07923	7.34979	4.94502
ENSMUSG00000024867	Pip5k1b	2.78232e-09	1.57156e-07	-0.490955	0.0825973	6.68614	0.0784426	0.00068776	0.00697687	0.00954572	0.00954572	24.2863	24.7096	28.7055	41.5108	44.3853	38.49
ENSMUSG00000020734	Grin2c	2.86485e-09	1.6144e-07	-0.344819	0.0580586	9.13652	0.0358518	0.000100961	0.000126218	0.00495523	0.00495523	57.8462	59.1074	58.3468	83.2983	82.6373	80.5585
ENSMUSG00000068129	Cst7	2.97315e-09	1.67153e-07	3.96508	0.668302	2.42535	5.25252	0.104643	0.565298	0.323323	0.565298	4.41226	4.12411	4.65382	0	0.0521733	0.238885
ENSMUSG00000053192	Mllt11	2.99605e-09	1.67837e-07	-0.510184	0.086008	7.22081	0.086963	0.000232258	0.0108638	0.00727473	0.0108638	121.236	114.93	97.8425	158.395	166.816	185.517
ENSMUSG00000015342	Xk	2.99919e-09	1.67837e-07	-0.677403	0.114202	7.71841	0.153313	0.000545937	0.0190171	0.00602884	0.0190171	13.4032	14.5191	17.7248	29.7497	33.7962	26.5863
ENSMUSG00000036504	Phpt1	3.01854e-09	1.68529e-07	-0.402161	0.0678114	7.55794	0.0513367	0.000536668	0.0029841	0.00636091	0.00636091	112.054	95.9959	105.309	141.79	150.404	152.528
ENSMUSG00000035569	Ankrd11	3.13142e-09	1.74429e-07	0.345508	0.058318	9.11174	0.038275	0.000151845	0.00292585	0.00494965	0.00494965	100.359	94.7414	103.973	67.7416	74.9047	68.0877
ENSMUSG00000060743	H3f3a	3.18309e-09	1.76899e-07	-0.368219	0.0621796	9.07366	0.0453152	0.00011324	0.00568621	0.00494268	0.00568621	614.215	603.338	647.332	792.694	842.21	972.11
ENSMUSG00000022753	Tmem30c	3.19773e-09	1.77305e-07	1.59843	0.269955	4.32052	0.853946	0.0316215	0.0776918	0.0522108	0.0776918	2.48596	2.63587	3.29222	0.840004	0.588091	0.299043
ENSMUSG00000033191	Tie1	3.2156e-09	1.77888e-07	0.516455	0.0872362	6.61316	0.0848918	0.00146033	0.00463218	0.00995489	0.00995489	7.85913	8.52076	8.10986	4.29799	5.06089	5.23506
ENSMUSG00000029291	Rufy3	3.3538e-09	1.8511e-07	0.345202	0.0583774	9.22513	0.037759	0.000129817	0.00238243	0.00498207	0.00498207	213.938	220.919	241.775	156.478	156.671	155.781
ENSMUSG00000039236	Isg20	3.44998e-09	1.89985e-07	1.17466	0.198804	4.48109	0.421167	0.0130869	-0.00406068	0.0461978	0.0461978	9.3075	8.47222	10.891	3.11595	2.32763	2.90119
ENSMUSG00000001103	Sebox	3.52639e-09	1.93751e-07	-0.630135	0.106712	6.30036	0.132786	0.00193394	0.0151472	0.0120652	0.0151472	12.6241	10.6872	15.0191	25.118	22.5918	22.4044
ENSMUSG00000013367	Iglon5	3.54539e-09	1.93914e-07	-0.442833	0.0750042	7.09881	0.059479	0.000746203	6.45175e-05	0.00769224	0.00769224	21.8332	21.6626	23.0219	34.4554	33.3978	33.9885
ENSMUSG00000053580	Tanc2	3.54381e-09	1.93914e-07	0.78119	0.132311	7.04964	0.204085	0.00284668	0.0234126	0.00787571	0.0234126	26.8635	28.7986	36.7981	12.0151	16.1097	13.7574
ENSMUSG00000025969	Nrp2	3.85055e-09	2.10129e-07	0.450865	0.0765412	7.03808	0.0666124	0.00086766	0.00616801	0.00792018	0.00792018	8.38338	9.13396	8.19875	5.27339	6.12154	4.99868
ENSMUSG00000016477	E2f3	4.02826e-09	2.19332e-07	-0.455475	0.0774218	6.99173	0.0649754	0.000887372	0.00253541	0.00810383	0.00810383	7.20061	7.63215	8.00818	11.7927	12.7849	11.3466
ENSMUSG00000027782	Kpna4	4.05515e-09	2.19909e-07	0.385441	0.0655296	8.5437	0.0497223	0.00023049	0.00621071	0.00504818	0.00621071	77.9608	85.3617	91.6727	53.3832	58.6889	61.4418
ENSMUSG00000113252	Gm33489	4.05706e-09	2.19909e-07	-1.38964	0.236258	4.76165	0.646308	0.0132429	0.0704841	0.0378158	0.0704841	5.1457	5.35548	7.51082	28.7438	15.2529	26.8256
ENSMUSG00000092417	Gpank1	4.28769e-09	2.3189e-07	-0.759261	0.129287	5.53699	0.192728	0.00392988	0.0208009	0.0211427	0.0211427	14.3025	15.1695	13.8761	37.0911	24.3342	27.9153
ENSMUSG00000004698	Hdac9	4.42368e-09	2.38711e-07	0.482885	0.0822981	6.82775	0.0762855	0.00133326	0.00658178	0.0088262	0.0088262	14.808	14.9318	16.3657	8.53452	9.36481	10.7359
ENSMUSG00000084786	Ubl5	4.54609e-09	2.4477e-07	-0.420817	0.0717752	7.31573	0.0562089	0.000743358	0.00311015	0.00698416	0.00698416	240.149	215.345	199.65	261.026	264.588	246.471
ENSMUSG00000030806	Stx1b	4.65119e-09	2.49872e-07	-0.346985	0.0592207	9.59206	0.0396049	4.94481e-05	0.00430704	0.00521118	0.00521118	186.001	173.756	197.032	256.539	278.748	243.838
ENSMUSG00000022378	Fam49b	4.66261e-09	2.4993e-07	-0.378515	0.0646063	8.37455	0.0479908	0.000356707	0.00590426	0.00516297	0.00590426	111.617	104.358	101.477	150.96	138.95	171.006
ENSMUSG00000016256	Ctsz	4.79204e-09	2.563e-07	0.445293	0.0760634	7.08142	0.061735	0.000922391	0.0018891	0.00775607	0.00775607	45.3373	40.0965	44.6156	27.6167	26.5829	27.3587
ENSMUSG00000017978	Cadps2	4.98178e-09	2.6586e-07	-0.455207	0.0778427	9.78534	0.0694355	0.000184031	0.00890521	0.00541359	0.00890521	138.576	156.793	169.197	220.634	258.786	256.029
ENSMUSG00000039717	Ralyl	5.01855e-09	2.67174e-07	-0.483075	0.0826256	6.78289	0.077612	0.00119637	0.008308	0.00904412	0.00904412	69.1171	76.1018	58.562	97.4283	107.58	111.592
ENSMUSG00000024486	Hbegf	5.02851e-09	2.67174e-07	-0.426641	0.0729772	7.24126	0.0587807	0.000778802	0.00443854	0.00720971	0.00720971	19.0377	20.7575	21.271	28.2939	30.4847	33.1707
ENSMUSG00000040229	Gpr34	5.24978e-09	2.78319e-07	0.731241	0.125233	5.71157	0.179234	0.00365092	0.019874	0.0184207	0.019874	14.524	11.2382	12.7342	7.51211	5.35163	5.6705
ENSMUSG00000003273	Car11	5.55331e-09	2.93766e-07	-0.541038	0.0928075	6.70108	0.0981525	0.00318162	0.00973822	0.0094653	0.00973822	58.3283	44.4686	52.1872	76.9311	81.1695	90.804
ENSMUSG00000038717	Atp5l	5.69255e-09	3.00475e-07	-0.347328	0.0596216	8.51946	0.0374498	0.000269949	0.00130342	0.00506215	0.00506215	579.258	582.132	563.651	780.035	784.342	863.07
ENSMUSG00000026860	Sh3glb2	5.75014e-09	3.02195e-07	-0.481353	0.0826517	8.39093	0.0777077	0.000527056	0.00971991	0.00515007	0.00971991	151.422	129.707	121.038	199.303	199.858	229.141
ENSMUSG00000039470	Zdhhc2	5.74412e-09	3.02195e-07	-0.434928	0.074678	7.20067	0.057141	0.00102509	-0.000534732	0.00734012	0.00734012	35.148	35.2601	35.7879	54.2002	54.743	52.1718
ENSMUSG00000043702	Pde12	5.92366e-09	3.10639e-07	0.452069	0.0776899	7.25302	0.0685529	0.000682144	0.00837143	0.00717291	0.00837143	10.223	10.576	11.944	6.92935	7.67412	6.36964
ENSMUSG00000071076	Jund	6.01796e-09	3.14901e-07	-0.826905	0.142171	7.34074	0.229387	0.000762919	0.0295561	0.00691221	0.0295561	20.73	21.6808	31.4293	50.8528	62.0135	51.0151
ENSMUSG00000032192	Gnb5	6.03792e-09	3.15263e-07	-0.381501	0.0655983	7.67487	0.0458334	0.00034151	0.0023717	0.0061132	0.0061132	108.437	95.1981	97.5011	138.662	140.833	144.092
ENSMUSG00000056895	Hist3h2ba	6.21562e-09	3.23842e-07	-0.698625	0.120228	5.75024	0.159988	0.00380843	0.0131477	0.0178736	0.0178736	30.6371	24.3242	21.6264	47.201	45.2264	50.9431
ENSMUSG00000021094	Dhrs7	6.30108e-09	3.27588e-07	0.453969	0.0781551	6.95907	0.0658647	0.000923863	0.00412409	0.00823847	0.00823847	49.2415	51.3935	48.7197	34.3826	28.3478	30.4207
ENSMUSG00000002771	Grin2d	6.51618e-09	3.38044e-07	-0.534389	0.0920893	6.57844	0.090785	0.0025611	0.00383096	0.0101596	0.0101596	3.84195	3.71636	3.16934	6.15975	5.86412	6.18232
ENSMUSG00000051703	Tmem198	6.55992e-09	3.39585e-07	-0.533299	0.0919192	6.62244	0.0924676	0.00277243	0.00615926	0.00990128	0.00990128	18.7866	16.1222	16.101	25.2935	30.6578	28.0808
ENSMUSG00000028459	Cd72	6.69728e-09	3.45954e-07	1.54287	0.266087	4.12111	0.76519	0.0446427	0.0191805	0.061561	0.061561	6.20472	8.76403	5.20751	1.75776	1.26423	1.01349
ENSMUSG00000040747	Cd53	6.75095e-09	3.47984e-07	1.11652	0.192603	5.05285	0.418499	0.00765249	0.0479912	0.0307949	0.0479912	9.1681	7.40918	8.49624	3.85918	2.33669	2.15333
ENSMUSG00000042747	Krtcap2	6.83226e-09	3.51425e-07	0.463271	0.0799432	6.9413	0.068371	0.00127279	0.00370855	0.00831359	0.00831359	98.8237	104.424	112.791	57.3531	63.4501	65.1927
ENSMUSG00000059552	Trp53	6.98041e-09	3.58283e-07	0.505502	0.0872851	6.81399	0.0812343	0.00253593	0.00318214	0.0088921	0.0088921	27.8709	24.8618	24.2824	15.0348	14.1387	16.3349
ENSMUSG00000033579	Fa2h	7.46718e-09	3.82456e-07	-0.380125	0.0657648	7.76125	0.045071	0.00053801	0.00161517	0.0059495	0.0059495	42.3635	46.7953	44.5434	62.9298	62.4863	67.502
ENSMUSG00000031155	Pim2	7.49554e-09	3.83097e-07	-0.490421	0.0848563	6.63341	0.0733774	0.000962308	0.000567327	0.00983857	0.00983857	25.7592	25.7858	24.5847	38.7292	41.3052	37.9826
ENSMUSG00000098097	6530403H02Rik	7.54222e-09	3.84669e-07	-3.9904	0.690573	1.88054	4.93945	0.151565	0.051515	0.563773	0.563773	0.0301202	0.102043	0	3.91434	5.24077	3.21616
ENSMUSG00000047735	Samd9l	7.61091e-09	3.87355e-07	0.768418	0.133017	5.43989	0.187326	0.00370148	0.0090319	0.0228386	0.0228386	5.96561	6.79279	5.62177	2.4726	3.14518	2.90599
ENSMUSG00000045733	Sprn	7.77209e-09	3.94727e-07	-0.485252	0.0840507	6.64681	0.0720024	0.000834044	0.000867803	0.00976274	0.00976274	12.8464	11.9909	13.2815	20.229	20.7595	20.009
ENSMUSG00000041329	Atp1b2	7.91878e-09	4.01334e-07	-0.385132	0.0667453	9.58844	0.049844	0.000103954	0.00657845	0.00520795	0.00657845	624.614	619.551	673.263	890.804	907.858	780.835
ENSMUSG00000116525	Gm30371	8.10701e-09	4.10015e-07	1.50409	0.260845	3.9136	0.736826	0.0280458	0.0446292	0.0740145	0.0740145	0.870863	0.910174	1.42776	0.232868	0.293139	0.172138
ENSMUSG00000056091	St3gal5	8.2608e-09	4.1692e-07	-0.436459	0.075734	8.01635	0.0640317	0.000261583	0.00834188	0.00554682	0.00834188	79.5371	74.6899	88.3984	118.442	136.332	114.237
ENSMUSG00000034701	Neurod1	8.56537e-09	4.31391e-07	-0.468198	0.0813276	9.84707	0.0736998	5.01349e-05	0.00987114	0.00549113	0.00987114	266.403	266.852	293.894	381.916	452.909	487.887
ENSMUSG00000055862	Izumo4	8.61903e-09	4.33191e-07	-1.17695	0.204478	5.64524	0.465738	0.00807711	0.0546398	0.019406	0.0546398	19.6295	16.693	13.5328	48.4467	38.2179	67.5847
ENSMUSG00000057666	Gapdh	8.64646e-09	4.33668e-07	-0.338474	0.0588104	9.48794	0.0360595	6.17461e-05	0.00205095	0.00512624	0.00512624	1402.77	1284.74	1239.05	1698.1	1720.55	1653.67
ENSMUSG00000040666	Sh3bgr	9.05869e-09	4.53403e-07	-1.16631	0.202927	4.96713	0.457502	0.017114	0.0446548	0.0327466	0.0446548	10.5626	13.271	8.67188	25.4314	29.4597	43.9954
ENSMUSG00000040612	Ildr2	9.08568e-09	4.53815e-07	0.642465	0.111792	5.78455	0.135378	0.00134137	0.0130956	0.0174048	0.0174048	8.72218	8.49042	7.17871	4.195	4.87879	3.95445
ENSMUSG00000029861	Fam131b	9.28929e-09	4.63028e-07	-0.351732	0.061243	9.35416	0.0416155	7.395e-05	0.00555211	0.00504058	0.00555211	89.9839	76.9022	87.0967	113.231	127.358	116.755
ENSMUSG00000002083	Bbc3	9.32392e-09	4.63798e-07	1.10212	0.19192	5.49444	0.408598	0.00342255	0.0518273	0.0218698	0.0518273	35.6184	24.9424	38.105	8.38453	12.9052	9.26295
ENSMUSG00000037235	Mxd4	9.58456e-09	4.75784e-07	-0.384145	0.0669485	8.10653	0.0496487	0.00021126	0.00651189	0.00543121	0.00651189	42.0031	37.5089	43.5702	60.9105	63.8957	54.1821
ENSMUSG00000095779	Gm2163	9.65553e-09	4.78325e-07	-1.56152	0.2722	4.22103	0.779137	0.0545695	0.0049708	0.0565697	0.0565697	0.399228	0.336857	0.62416	1.79887	2.34943	2.18511
ENSMUSG00000082286	Pisd-ps1	1.02848e-08	5.08457e-07	-1.44285	0.251983	6.64277	0.700738	0.00220796	0.0930355	0.0097855	0.0930355	30.573	20.3329	28.8954	119.076	68.0953	136.776
ENSMUSG00000025558	Dock9	1.08758e-08	5.36577e-07	-0.335107	0.0586213	8.90486	0.0342489	0.000219408	0.000480425	0.00493528	0.00493528	67.3719	64.5416	62.4607	91.4164	89.606	90.1976
ENSMUSG00000027273	Snap25	1.11903e-08	5.5097e-07	-0.453334	0.0793703	11.2097	0.0666554	1.48894e-05	0.00623761	0.00943459	0.00943459	1280.23	1428.88	1473.73	2103.16	2359.29	2072.29
ENSMUSG00000020886	Dlg4	1.12369e-08	5.52136e-07	-0.358684	0.0628066	8.05737	0.0407284	0.000424436	0.00224082	0.00549257	0.00549257	173.564	160.597	160.186	227.78	237.283	205.293
ENSMUSG00000026202	Tuba4a	1.16011e-08	5.68879e-07	-0.525813	0.0921592	8.60218	0.0931357	0.000266359	0.0124736	0.00501785	0.0124736	238.244	289.447	283.617	396.339	440.158	500.439
ENSMUSG00000038481	Cdk19	1.1722e-08	5.73645e-07	-0.414866	0.0727361	8.19767	0.0579828	0.000225551	0.00771025	0.00532765	0.00771025	34.1227	31.7629	32.712	54.1424	52.5004	43.9299
ENSMUSG00000008140	Emc10	1.2073e-08	5.89625e-07	-0.387681	0.0680298	7.46705	0.0460552	0.000365781	0.000842098	0.0065763	0.0065763	84.8171	81.747	86.3057	115.724	125.162	117.257
ENSMUSG00000027350	Chgb	1.33876e-08	6.52511e-07	-0.495248	0.0871756	10.2544	0.0827007	2.78146e-05	0.0113716	0.00617827	0.0113716	281.84	323.252	322.114	437.772	507.68	551.247
ENSMUSG00000062296	Trank1	1.41285e-08	6.87236e-07	0.483146	0.0851835	7.00166	0.0787364	0.000917617	0.00996671	0.00806373	0.00996671	110.908	105.273	110.007	59.4848	57.3701	73.7744
ENSMUSG00000027204	Fbn1	1.46777e-08	7.12518e-07	0.482409	0.0851516	6.68154	0.076733	0.00130549	0.00734148	0.00957071	0.00957071	3.99696	4.19307	3.61601	2.33352	2.74099	2.24457
ENSMUSG00000039126	Prune2	1.52172e-08	7.37225e-07	-0.337662	0.0596671	8.41159	0.0356763	0.000205907	0.00163359	0.00513434	0.00513434	101.299	93.6665	97.1801	134.857	141.417	128.456
ENSMUSG00000044681	Cnpy1	1.6027e-08	7.74905e-07	-0.423944	0.0750318	9.43014	0.0606742	0.000106791	0.00833786	0.00508605	0.00833786	227.653	223.097	200.322	323.526	295.58	372.55
ENSMUSG00000037408	Cnnm4	1.64095e-08	7.91817e-07	-0.537052	0.0951185	6.54454	0.0973844	0.000931316	0.01264	0.0103659	0.01264	6.81885	6.89962	7.03968	12.3529	13.0558	9.7671
ENSMUSG00000034384	Barhl2	1.64601e-08	7.92674e-07	-0.627173	0.11109	6.77932	0.132813	0.00101775	0.0174939	0.00906183	0.0174939	10.067	10.5369	13.4831	20.6414	23.4662	18.5723
ENSMUSG00000015745	Plekho1	1.67807e-08	8.06507e-07	-0.691118	0.122489	6.7996	0.161298	0.00205897	0.0204464	0.00896188	0.0204464	45.3386	35.934	46.8202	66.9749	87.0184	90.2082
ENSMUSG00000059498	Fcgr3	1.69229e-08	8.11726e-07	0.826209	0.146469	5.57648	0.23053	0.00326271	0.0289172	0.0204905	0.0289172	17.3359	12.9484	13.7663	5.51142	7.90506	5.53849
ENSMUSG00000028795	Ccdc28b	1.7131e-08	8.20083e-07	-0.424971	0.0753664	7.15713	0.0598641	0.00103396	0.0060711	0.00748618	0.00748618	139.664	148.507	139.222	181.517	181.875	205.086
ENSMUSG00000046229	Scand1	1.72493e-08	8.24116e-07	-1.17229	0.207943	4.42098	0.440531	0.0165405	0.018777	0.0483199	0.0483199	2.6904	3.50267	4.68548	10.4898	10.7042	11.5366
ENSMUSG00000090338	Gm17081	1.76598e-08	8.4206e-07	-3.74302	0.664423	2.08818	4.51224	0.205188	0.181286	0.456999	0.456999	0.203984	0	0.39558	12.8562	8.68359	7.1186
ENSMUSG00000018770	Atp5g3	1.7992e-08	8.56214e-07	-0.326611	0.0580098	8.97554	0.034784	0.000113978	0.00336295	0.00493373	0.00493373	666.994	669.726	584.064	882.785	807.884	850.709
ENSMUSG00000016427	Ndufa1	1.87165e-08	8.88939e-07	-0.448069	0.0796784	6.88564	0.0641658	0.00096512	0.00395502	0.00855785	0.00855785	214.87	194.59	188.23	306.962	270.822	269.725
ENSMUSG00000030695	Aldoa	1.8903e-08	8.9604e-07	-0.33699	0.059944	9.72877	0.0349991	4.17995e-05	0.00112113	0.00534812	0.00534812	791.939	741.4	725.665	1015.45	1061.98	993.461
ENSMUSG00000069874	Irgm2	1.92904e-08	9.11666e-07	0.964715	0.171711	5.70676	0.314584	0.00329494	0.0409321	0.0184902	0.0409321	4.51653	6.99277	6.36403	2.12978	2.71332	1.90683
ENSMUSG00000039989	Cbx4	1.93081e-08	9.11666e-07	0.449828	0.0800677	8.03021	0.0683965	0.000786706	0.00882956	0.00552818	0.00882956	43.4946	37.2097	43.648	23.289	27.2955	27.912
ENSMUSG00000050856	Atp5k	1.94872e-08	9.18328e-07	-0.46884	0.0834755	7.20206	0.0743049	0.000774491	0.00967774	0.00733556	0.00967774	331.6	382.491	321.316	486.482	480.287	525.813
ENSMUSG00000026626	Ppp2r5a	1.96257e-08	9.23056e-07	0.515266	0.0917616	6.72855	0.0863993	0.00330993	0.00512719	0.00932034	0.00932034	99.6307	95.1695	104.977	49.6471	63.4897	57.5979
ENSMUSG00000047180	Neurl3	2.00879e-08	9.42961e-07	1.07941	0.192365	4.59001	0.393941	0.0119431	0.0435633	0.0426809	0.0435633	4.34436	3.61884	2.99729	0.970644	1.61613	1.15596
ENSMUSG00000010663	Fads1	2.1482e-08	1.00645e-06	-0.452894	0.0808794	8.70352	0.0693837	0.000190886	0.00962133	0.00497641	0.00962133	53.5807	61.9097	50.3016	90.8641	90.8286	77.082
ENSMUSG00000033703	Fuk	2.15612e-08	1.0082e-06	-0.574876	0.102675	6.78169	0.111795	0.00144544	0.0143678	0.00905005	0.0143678	8.36934	8.05218	8.10889	15.7525	11.7692	16.2899
ENSMUSG00000041263	Rusc1	2.16198e-08	1.00899e-06	-0.368	0.0657318	7.88145	0.0439468	0.000735686	0.00341368	0.00574532	0.00574532	45.8244	43.6662	39.4062	61.9969	63.2482	57.8689
ENSMUSG00000105207	Gm42927	2.17836e-08	1.01468e-06	0.534261	0.0954514	7.05554	0.0920375	0.00581325	0.00219557	0.00785321	0.00785321	19.9308	20.7397	18.8147	10.2653	12.7596	11.91
ENSMUSG00000057897	Camk2b	2.23353e-08	1.03838e-06	-0.324365	0.0579962	9.22943	0.0327028	6.16859e-05	0.00136211	0.00498365	0.00498365	196.316	186.68	187.812	250.323	271.443	255.684
ENSMUSG00000058975	Kcnc1	2.31283e-08	1.07318e-06	-0.410076	0.0734009	9.41039	0.056914	6.93235e-05	0.00801221	0.00507343	0.00801221	116.598	125.408	132.044	184.125	209.718	168.045
ENSMUSG00000019437	Tlcd1	2.38902e-08	1.10641e-06	-0.599831	0.107474	6.02501	0.114251	0.00278503	0.00510537	0.0145409	0.0145409	29.0317	37.1973	33.5974	56.787	55.3907	55.268
ENSMUSG00000047712	Ust	2.41129e-08	1.11459e-06	-0.372234	0.0667138	8.3157	0.0469082	0.000208651	0.00646744	0.00521257	0.00646744	33.7228	33.6702	38.4018	48.7755	55.8302	48.3996
ENSMUSG00000040565	Btaf1	2.4716e-08	1.14028e-06	0.549608	0.0985797	8.18574	0.102282	0.000277293	0.0142996	0.00534046	0.0142996	27.156	30.5902	35.105	16.3422	19.8626	17.6133
ENSMUSG00000116946	AC130815.2	2.47781e-08	1.14097e-06	1.02038	0.183034	4.67907	0.315777	0.0101845	-0.00590466	0.0400676	0.0400676	1.74212	1.55432	1.7655	0.580414	0.584313	0.64301
ENSMUSG00000026833	Olfm1	2.52021e-08	1.15671e-06	-0.344566	0.0618404	9.956	0.0400772	9.22518e-05	0.00548197	0.00564409	0.00564409	270.302	282.598	305.46	364.042	424.721	415.393
ENSMUSG00000041378	Cldn5	2.52156e-08	1.15671e-06	0.426746	0.0765907	7.15974	0.061673	0.000784127	0.00801507	0.00747722	0.00801507	47.9975	56.9306	46.1743	29.832	31.9394	35.6444
ENSMUSG00000031104	Rab33a	2.54994e-08	1.16751e-06	-0.522735	0.0938512	6.38047	0.090276	0.00174848	0.00862711	0.0114636	0.0114636	19.3908	20.4272	15.817	28.4247	30.3439	31.4306
ENSMUSG00000001227	Sema6b	2.61685e-08	1.19588e-06	-0.39181	0.0704022	7.39099	0.0493108	0.000661468	0.00340892	0.00677323	0.00677323	14.2028	13.3711	13.0637	19.2905	21.6482	18.9819
ENSMUSG00000020737	Jpt1	2.68385e-08	1.22419e-06	-0.624967	0.112386	5.75932	0.125048	0.00119785	0.00864334	0.017748	0.017748	24.3706	24.6998	22.0507	47.1674	37.219	39.1463
ENSMUSG00000028086	Fbxw7	2.69882e-08	1.2287e-06	-0.356624	0.0641419	8.82765	0.0430913	0.0001918	0.00597947	0.00494462	0.00597947	64.0883	70.5129	68.3342	87.1493	104.839	97.3188
ENSMUSG00000027500	Stmn2	2.71349e-08	1.23306e-06	-0.495708	0.0891724	9.56353	0.08326	5.6791e-05	0.0118708	0.00518628	0.0118708	451.593	433.085	421.87	617.913	695.061	812.409
ENSMUSG00000057596	Trim30d	2.76782e-08	1.25539e-06	1.11725	0.201106	4.3893	0.403534	0.0111681	0.0251566	0.0494974	0.0494974	3.26621	3.71332	3.30204	0.905616	1.4698	0.98642
ENSMUSG00000026764	Kif5c	2.83175e-08	1.28197e-06	-0.343858	0.0619392	7.90515	0.036683	4.65452e-05	0.00146794	0.00570816	0.00570816	268.432	270.277	290.847	333.285	360.5	342.837
ENSMUSG00000078532	Nkain1	3.0782e-08	1.39094e-06	-0.447848	0.0808838	7.61685	0.068021	0.000534839	0.00927845	0.00623216	0.00927845	84.2827	67.2772	80.2965	123.453	115.388	111.434
ENSMUSG00000038909	Kat7	3.11683e-08	1.40577e-06	0.352902	0.0637612	7.89312	0.0389135	0.00037134	0.00156807	0.00572689	0.00572689	71.9691	76.5888	74.8651	51.6552	54.1124	48.4614
ENSMUSG00000027951	Adar	3.27582e-08	1.47199e-06	0.34248	0.061976	8.34617	0.0378089	0.000575273	0.00270109	0.00518626	0.00518626	85.6291	88.0482	85.1969	65.5128	60.4664	55.8182
ENSMUSG00000087042	Gm11611	3.27432e-08	1.47199e-06	-0.677638	0.122625	6.30239	0.155802	0.00184134	0.020714	0.0120495	0.020714	10.2244	14.2213	10.9059	25.407	20.0884	21.9438
ENSMUSG00000031950	Gabarapl2	3.30052e-08	1.47759e-06	-0.335129	0.0606602	8.25585	0.0361181	0.000251197	0.00277955	0.00526829	0.00526829	281.085	254.933	265.369	372.414	369.329	326.901
ENSMUSG00000025078	Nhlrc2	3.29833e-08	1.47759e-06	0.469055	0.0848997	6.68862	0.0714392	0.00127968	0.00551452	0.00953227	0.00953227	10.2235	11.1026	12.5627	6.91243	7.40916	6.79607
ENSMUSG00000015944	Castor2	3.48919e-08	1.55917e-06	-0.567551	0.102912	5.93251	0.0981658	0.000329092	0.00158516	0.0155572	0.0155572	20.0457	18.8988	17.3152	29.6728	31.1842	29.2711
ENSMUSG00000091649	Phf11b	3.52471e-08	1.57214e-06	3.71143	0.673196	1.80221	4.66872	0.0699447	0.600429	0.609845	0.609845	1.42869	2.55155	1.44791	0.129355	0	0
ENSMUSG00000085244	Spag17os	3.62576e-08	1.61423e-06	-0.84317	0.153076	5.14285	0.224803	0.006332	0.00807097	0.0288164	0.0288164	2.06313	1.70315	1.88819	5.14661	4.00671	3.98357
ENSMUSG00000033316	Galnt9	3.8226e-08	1.69874e-06	-0.380565	0.069208	7.44717	0.0473842	0.000558383	0.00436073	0.00662624	0.00662624	37.1501	32.0083	37.0099	51.0578	52.9924	48.5424
ENSMUSG00000050821	Fam131a	4.0794e-08	1.80953e-06	-0.443637	0.0808467	7.62381	0.0668875	0.000372005	0.00943229	0.00621748	0.00943229	71.3259	82.1251	78.3006	99.5552	123.564	125.301
ENSMUSG00000036510	Cdh8	4.08866e-08	1.81032e-06	-0.454883	0.0829023	7.59771	0.070323	0.000502065	0.00980713	0.00627308	0.00980713	20.6721	21.8965	24.4706	32.5083	33.8629	35.6124
ENSMUSG00000058966	Fam57b	4.35699e-08	1.9256e-06	-0.349865	0.0638938	7.92198	0.0380095	0.00044126	0.0011684	0.00568236	0.00568236	46.7664	45.7134	49.174	63.7839	69.1352	63.5683
ENSMUSG00000027612	Mmp24	4.43e-08	1.95429e-06	-0.395594	0.0722837	8.91326	0.0532183	0.000117138	0.00772027	0.00493475	0.00772027	91.8591	81.5559	100.702	130.441	142.538	128.168
ENSMUSG00000060371	Caln1	4.47691e-08	1.97139e-06	-0.657353	0.120154	8.39437	0.146958	0.000345326	0.0213101	0.0051474	0.0213101	69.4453	68.3678	88.5502	150.587	159.682	120.331
ENSMUSG00000037872	Ackr1	4.50312e-08	1.97933e-06	-0.328558	0.0600666	8.43266	0.0349417	0.00029305	0.00290287	0.00511894	0.00511894	160.971	166.017	171.99	213.196	218.797	244.859
ENSMUSG00000018340	Anxa6	4.51603e-08	1.9814e-06	-0.324283	0.0592907	8.5448	0.0328431	0.000225508	0.00139347	0.00504757	0.00504757	68.7088	70.7663	70.5876	92.3865	101.413	92.6771
ENSMUSG00000030276	Ttll3	4.56363e-08	1.99866e-06	0.459896	0.0841141	7.70684	0.0719414	0.00101029	0.00960247	0.00605086	0.00960247	62.3907	54.8022	63.5909	34.5671	35.9386	43.2512
ENSMUSG00000003469	Phyhip	4.6668e-08	2.04014e-06	-0.479927	0.0878414	9.21305	0.0783583	0.000229164	0.011345	0.00497778	0.011345	201.197	168.746	191.524	283.756	339.816	266.547
ENSMUSG00000062101	Zfp119b	4.7111e-08	2.05579e-06	0.689886	0.126309	6.12274	0.161928	0.00229913	0.0216319	0.0135779	0.0216319	19.0843	15.4907	19.398	8.45586	7.60575	10.8792
ENSMUSG00000026458	Ppfia4	4.80317e-08	2.08468e-06	-0.321124	0.0588307	9.24187	0.0330232	0.00020322	0.0024055	0.00498835	0.00498835	82.5723	80.822	73.6158	107.318	103.802	111.629
ENSMUSG00000029765	Plxna4	4.7999e-08	2.08468e-06	-0.507126	0.0929046	7.6739	0.0875106	0.000270156	0.0126767	0.00611514	0.0126767	8.62458	8.59936	8.91005	16.1331	15.6044	12.0332
ENSMUSG00000038390	Gpr162	4.80005e-08	2.08468e-06	-0.542364	0.0993601	8.61872	0.100094	0.000400087	0.0144086	0.00501013	0.0144086	62.1967	48.4483	45.341	85.3737	89.0869	86.5864
ENSMUSG00000004815	Dgkq	4.85031e-08	2.10137e-06	-0.383738	0.070324	8.24793	0.0483162	0.00214214	0.0030326	0.00527607	0.00527607	26.7096	26.1162	23.1193	39.5097	34.3165	37.4677
ENSMUSG00000040563	Plppr2	5.00007e-08	2.15989e-06	-0.330324	0.0605953	8.2512	0.0333861	0.000234841	0.000580108	0.00527284	0.00527284	44.4125	42.5175	42.8313	59.1546	61.6352	58.3938
ENSMUSG00000032064	Dixdc1	5.00327e-08	2.15989e-06	-0.357381	0.0655602	7.93274	0.0432148	0.000781058	0.00534195	0.00566614	0.00566614	67.0524	79.5657	78.6214	109.329	106.459	98.0029
ENSMUSG00000029088	Kcnip4	5.12674e-08	2.20925e-06	-0.325782	0.0598109	8.40641	0.0336404	0.000227794	0.00202257	0.00513823	0.00513823	97.9554	92.8889	101.45	138.581	136.467	128.868
ENSMUSG00000068551	Zfp467	5.16477e-08	2.22168e-06	-0.561601	0.10313	6.18807	0.0981861	0.00296285	0.00149655	0.0129909	0.0129909	40.7496	33.8827	35.669	61.1827	58.7894	57.8834
ENSMUSG00000035199	Arl6ip5	5.3026e-08	2.27692e-06	-0.327668	0.0602237	8.31182	0.0335537	0.00022431	0.00145545	0.00521602	0.00521602	115.61	120.94	109.325	151.921	157.074	165.202
ENSMUSG00000016349	Eef1a2	5.33983e-08	2.28884e-06	-0.347818	0.0639418	10.2117	0.0372804	4.20903e-05	0.00119192	0.00609073	0.00609073	447.398	426.993	435.789	609.949	632.13	588.622
ENSMUSG00000030057	Cnbp	5.36929e-08	2.29739e-06	0.31512	0.057941	8.97271	0.0318001	0.000102084	0.00241036	0.00493366	0.00493366	487.693	486.898	509.33	328.29	351.433	372.999
ENSMUSG00000031231	Cox7b	5.51645e-08	2.35619e-06	-0.439103	0.0808094	7.44503	0.0656795	0.000539728	0.00925551	0.00663168	0.00925551	223.424	244.783	203.555	336.694	286.361	330.91
ENSMUSG00000034652	Cd300a	5.83243e-08	2.48676e-06	0.700282	0.129111	6.33833	0.167122	0.0100258	0.0149787	0.0117743	0.0149787	6.4059	7.66708	6.26269	2.97412	4.155	2.99353
ENSMUSG00000015291	Gdi1	5.85685e-08	2.49277e-06	-0.330858	0.0610088	8.35614	0.0360457	0.000405167	0.00360191	0.00517794	0.00517794	394.632	394.184	393.388	542.538	474.384	555.798
ENSMUSG00000016356	Col20a1	5.89514e-08	2.50118e-06	0.849978	0.156766	6.12327	0.246229	0.00982005	0.0270433	0.013573	0.0270433	4.76012	8.11332	6.18518	2.55658	2.44142	2.74729
ENSMUSG00000059824	Dbp	5.89731e-08	2.50118e-06	-0.501088	0.0924196	7.69295	0.0855765	0.000715318	0.0120967	0.00607767	0.0120967	52.7047	54.4194	64.2906	101.742	93.3191	79.4974
ENSMUSG00000020733	Slc9a3r1	6.2201e-08	2.63347e-06	-0.355552	0.0656927	7.7169	0.0395915	0.000441615	0.00164112	0.00603169	0.00603169	36.5058	36.6403	38.2754	51.8263	55.2334	48.5708
ENSMUSG00000024360	Etf1	6.23349e-08	2.63452e-06	0.336078	0.062099	7.97095	0.0352981	0.000174303	0.00159272	0.00561013	0.00561013	79.746	85.0829	87.25	58.1404	60.3868	61.3155
ENSMUSG00000010086	Rnf112	6.35011e-08	2.67913e-06	-0.324029	0.0599093	8.26673	0.0348087	0.000125932	0.00401196	0.00525776	0.00525776	162.332	157.844	140.953	206.624	193.207	212.425
ENSMUSG00000025666	Tmem47	6.36318e-08	2.67996e-06	0.32168	0.0594791	8.35613	0.0345026	0.000128687	0.00419542	0.00517795	0.00517795	140.722	145.602	156.759	100.028	114.677	105.657
ENSMUSG00000094257	Ap3s1-ps2	6.42128e-08	2.69973e-06	4.21848	0.780238	1.41609	5.35256	0.01979	-0.00242671	0.893368	0.893368	5.19608	4.90459	3.64113	0	0	0
ENSMUSG00000038453	Srcin1	6.80384e-08	2.85561e-06	-0.346181	0.0641519	7.74309	0.0396364	0.000190495	0.00441445	0.00598271	0.00598271	57.4124	50.909	52.5245	73.7478	79.4262	68.5646
ENSMUSG00000043036	Ccdc63	6.84783e-08	2.86909e-06	-0.974966	0.180713	5.00173	0.324356	0.00787366	0.0411119	0.0319497	0.0411119	8.68125	6.264	11.3393	19.9914	20.4955	22.742
ENSMUSG00000066861	Oas1g	6.90056e-08	2.88618e-06	4.30197	0.797586	2.23384	6.31546	0.108686	0.845528	0.393818	0.845528	2.16672	3.27684	1.74097	0	0.14775	0
ENSMUSG00000041028	Ghitm	6.93922e-08	2.89733e-06	0.36023	0.066799	10.1732	0.0442842	7.04857e-05	0.00662268	0.00601513	0.00662268	769.08	804.828	940.518	557.21	596.434	573.879
ENSMUSG00000018427	Ypel2	7.0068e-08	2.92051e-06	-0.355427	0.0659296	7.68711	0.039511	0.000431005	0.00158471	0.00608907	0.00608907	15.2572	16.2356	15.0709	22.9494	22.5569	20.782
ENSMUSG00000035310	Lin54	7.08661e-08	2.94869e-06	0.469338	0.0870924	6.64288	0.0701767	0.00159273	0.003524	0.0097849	0.0097849	12.765	12.3567	14.4768	8.09377	8.59247	8.09974
ENSMUSG00000020255	D10Wsu102e	7.11838e-08	2.95682e-06	0.472773	0.087743	9.51526	0.0762929	6.13589e-05	0.0114869	0.00514695	0.0114869	4.69882	5.84343	6.2328	3.46921	3.46981	3.47859
ENSMUSG00000040265	Dnm3	7.18007e-08	2.96871e-06	-0.392242	0.0728181	8.37213	0.0525192	0.000287447	0.00766626	0.00516491	0.00766626	61.5928	56.7367	53.7146	86.7249	89.1921	74.1752
ENSMUSG00000036106	Prr5	7.18385e-08	2.96871e-06	-0.648507	0.120395	5.74077	0.133156	0.00373646	0.00499799	0.0180058	0.0180058	4.4853	5.01972	5.81447	9.13285	9.76758	9.36905
ENSMUSG00000022454	Nell2	7.15992e-08	2.96871e-06	-0.31488	0.0584506	9.30332	0.0309183	0.000109971	0.00135693	0.00501474	0.00501474	122.602	113.483	123.747	165.845	162.936	166.996
ENSMUSG00000063531	Sema3e	7.3097e-08	3.01556e-06	-0.450364	0.0836581	6.69052	0.0665322	0.000976006	0.00612901	0.009522	0.009522	5.88372	5.42561	5.47347	7.67824	9.10294	9.4115
ENSMUSG00000049907	Rasl11b	7.33527e-08	3.01712e-06	-0.44038	0.0818131	6.91621	0.0641785	0.00161804	0.00587964	0.00842203	0.00842203	19.7975	22.7991	24.4966	32.7702	33.0876	36.551
ENSMUSG00000037347	Chst7	7.33843e-08	3.01712e-06	-1.13712	0.211256	4.34715	0.413061	0.0158099	0.0156234	0.0511336	0.0511336	0.869226	0.696957	0.806854	2.79104	2.77202	1.90263
ENSMUSG00000032396	Dis3l	7.41932e-08	3.0452e-06	-0.412985	0.0767528	7.54939	0.0532855	0.00245622	0.00019208	0.00638028	0.00638028	28.3233	25.8324	27.3796	43.472	39.8902	39.9575
ENSMUSG00000054452	Aes	7.48147e-08	3.0655e-06	-0.320348	0.0595531	8.41069	0.0345454	0.000184844	0.00451327	0.00513502	0.00513502	307.045	302.878	274.905	364.246	369.266	402.245
ENSMUSG00000026950	Neb	7.60155e-08	3.10943e-06	-0.550616	0.102415	6.14785	0.0973134	0.00238531	0.00556476	0.0133478	0.0133478	8.31984	10.4875	8.48818	15.6986	15.5287	15.1072
ENSMUSG00000051790	Nlgn2	7.8334e-08	3.19886e-06	-0.335874	0.0625357	8.77245	0.0376642	0.000909872	0.00386598	0.00495619	0.00495619	69.1258	61.9436	66.1826	87.9156	99.2492	86.4132
ENSMUSG00000053641	Dennd4a	8.12273e-08	3.31142e-06	0.37756	0.0703827	7.39041	0.0473863	0.000655801	0.00512037	0.00677478	0.00677478	41.5755	41.2467	42.819	25.7304	31.9724	28.3336
ENSMUSG00000064247	Plcxd1	8.14829e-08	3.31624e-06	0.799041	0.148969	5.71501	0.217117	0.0149163	0.0170546	0.0183713	0.0183713	9.02527	7.12151	6.25902	3.90913	2.75869	3.2836
ENSMUSG00000053675	Tgm5	8.24712e-08	3.3452e-06	-0.981016	0.18297	4.79914	0.328891	0.00720828	0.0430085	0.0368397	0.0430085	2.01535	1.39044	1.47133	5.52089	4.02297	3.30156
ENSMUSG00000091002	Tcerg1l	8.23997e-08	3.3452e-06	0.586971	0.109473	6.37643	0.114072	0.00648368	0.00690527	0.0114928	0.0114928	14.6758	11.3073	11.936	6.30924	7.03801	7.42613
ENSMUSG00000034908	Sidt2	8.33769e-08	3.37628e-06	-0.445634	0.0831459	6.72834	0.0640256	0.00104844	0.0045125	0.00932142	0.00932142	62.3261	59.5261	55.9109	91.5839	77.6951	87.2019
ENSMUSG00000116165	Pdxp	8.53268e-08	3.44946e-06	-0.319242	0.0596102	8.41242	0.0347742	0.000196344	0.00505322	0.00513372	0.00513372	79.4516	72.1992	68.9116	92.3627	103.133	104.149
ENSMUSG00000025351	Cd63	9.17749e-08	3.70394e-06	0.347385	0.0650254	7.7628	0.040583	0.000395747	0.0050794	0.0059467	0.0059467	149.356	138.746	126.875	101.317	89.0645	93.9684
ENSMUSG00000036908	Unc93b1	9.32259e-08	3.75623e-06	0.649987	0.121733	6.11345	0.144528	0.0035842	0.0186441	0.0136647	0.0186441	13.8116	15.2392	11.3526	6.05606	8.05869	6.76356
ENSMUSG00000026628	Atf3	9.40586e-08	3.78347e-06	2.43225	0.455661	5.53133	2.0239	0.00920998	0.302231	0.0212379	0.302231	21.6092	17.0569	19.2626	3.14141	2.07994	0.671749
ENSMUSG00000060780	Lrrtm1	9.78741e-08	3.93041e-06	0.725842	0.136164	5.9317	0.180303	0.002922	0.0248891	0.0155665	0.0248891	8.24059	9.03196	8.43691	3.20081	4.84881	4.62691
ENSMUSG00000030376	Slc8a2	9.94394e-08	3.98665e-06	-0.487003	0.0914088	8.9535	0.0811782	0.000153947	0.0123794	0.00493349	0.0123794	39.0973	41.8306	50.96	67.3958	77.4604	67.3469
ENSMUSG00000002105	Slc39a13	1.00262e-07	4.01297e-06	-0.567724	0.10659	6.40562	0.110327	0.00493409	0.012108	0.011284	0.012108	25.9901	23.8292	26.0167	37.163	40.5082	51.8099
ENSMUSG00000035863	Palm	1.00506e-07	4.01607e-06	-0.385876	0.072454	7.30019	0.0470326	0.000844568	0.00210863	0.00702979	0.00702979	70.3513	64.3458	65.7605	95.6274	100.631	87.02
ENSMUSG00000022619	Mapk8ip2	1.02365e-07	4.0836e-06	-0.314144	0.0590221	8.80344	0.0335678	0.000276218	0.0046762	0.00494919	0.00494919	75.0813	66.2418	68.8618	87.2429	99.4144	97.3477
ENSMUSG00000034275	Igsf9b	1.0447e-07	4.16072e-06	-0.595593	0.111979	7.80823	0.121466	0.000125695	0.0186834	0.00586653	0.0186834	15.2488	16.8638	21.4372	32.5887	34.1126	29.544
ENSMUSG00000070427	Il18bp	1.05853e-07	4.20889e-06	0.807031	0.151801	5.72781	0.223042	0.00928319	0.025282	0.0181885	0.025282	16.1456	11.2776	16.7107	6.43297	7.36387	5.63405
ENSMUSG00000027223	Mapk8ip1	1.08762e-07	4.31744e-06	-0.312724	0.0588774	9.45784	0.0295776	9.51323e-05	0.000203213	0.0051047	0.0051047	131.265	131.526	135.661	182.428	181.785	176.612
ENSMUSG00000073062	Zxdb	1.12221e-07	4.44743e-06	0.485961	0.0915916	6.85149	0.0809142	0.00150013	0.0110834	0.00871447	0.0110834	8.59555	9.33165	10.7823	5.80313	6.57477	5.32046
ENSMUSG00000097128	Gm26884	1.13523e-07	4.48528e-06	2.13974	0.403448	3.62517	1.56887	0.0530181	0.191138	0.0962305	0.191138	1.37868	1.27855	1.82679	0.092507	0.137806	0.358237
ENSMUSG00000047344	Lancl3	1.13547e-07	4.48528e-06	-0.473801	0.0893359	6.5647	0.0713835	0.00172899	0.00331747	0.0102424	0.0102424	6.86996	6.37137	5.74333	10.3041	10.5501	9.62016
ENSMUSG00000038199	4931409K22Rik	1.14502e-07	4.50096e-06	4.21053	0.794131	1.41212	5.34836	0.0491217	-0.011879	0.896844	0.896844	0.407999	0.668548	0.639575	0	0	0
ENSMUSG00000109715	Gm45606	1.14376e-07	4.50096e-06	-0.642226	0.121123	5.73002	0.133986	0.00384899	0.00896309	0.0181572	0.0181572	3.30796	2.47591	2.84821	5.76931	5.16949	5.18944
ENSMUSG00000022594	Lynx1	1.14425e-07	4.50096e-06	-0.350579	0.0661197	7.51792	0.0369881	0.000104542	4.11175e-05	0.00645317	0.00645317	116.401	112.516	117.008	151.555	150.85	148.961
ENSMUSG00000036622	Atp13a2	1.15202e-07	4.52113e-06	-0.349458	0.0659237	7.96728	0.0404922	0.000903507	0.00391633	0.0056154	0.0056154	42.4479	36.1318	36.4493	55.3536	53.8272	52.521
ENSMUSG00000006517	Mvd	1.20697e-07	4.7291e-06	-0.431828	0.0815935	6.80354	0.0576352	0.00104352	0.00107218	0.00894272	0.00894272	16.2856	14.8846	14.7245	24.2656	23.0911	22.6251
ENSMUSG00000087006	Gm13889	1.23119e-07	4.8138e-06	-0.511955	0.0967998	6.30148	0.0897261	0.00199874	0.0118721	0.0120566	0.0120566	14.4227	12.6477	14.3099	19.067	22.5233	25.5099
ENSMUSG00000039620	Trmt9b	1.23257e-07	4.8138e-06	-0.352469	0.0666469	7.76396	0.0389467	0.000718108	0.00137741	0.00594461	0.00594461	49.4927	46.9837	49.4087	64.3592	69.2662	71.5683
ENSMUSG00000042429	Adora1	1.29376e-07	5.04462e-06	-0.41804	0.0791783	9.03277	0.0599503	0.000140744	0.00926307	0.00493738	0.00926307	57.7456	52.8057	63.6111	88.8669	94.8893	77.8981
ENSMUSG00000052833	Sae1	1.29972e-07	5.05969e-06	0.346561	0.0656504	7.70259	0.0385585	0.000405926	0.002753	0.00605903	0.00605903	76.4514	83.4649	87.4473	56.2247	59.7546	55.3611
ENSMUSG00000010080	Epn3	1.31414e-07	5.10762e-06	-0.574917	0.108951	6.05484	0.107192	0.00357015	0.00647156	0.0142352	0.0142352	8.15335	8.54165	9.3772	15.4937	16.8053	13.1267
ENSMUSG00000020140	Lgr5	1.32383e-07	5.13703e-06	0.485319	0.0919946	6.52408	0.0716249	0.00220082	-0.000995047	0.0104937	0.0104937	15.0371	14.4895	14.3233	8.91781	8.56624	9.46816
ENSMUSG00000029757	Dync1i1	1.39034e-07	5.38646e-06	-0.311562	0.059159	8.63508	0.0295303	0.000246821	0.000264497	0.00500286	0.00500286	78.4591	74.3186	74.6852	103.493	103.286	100.795
ENSMUSG00000062098	Btbd3	1.45593e-07	5.63153e-06	-0.429573	0.0816982	9.65992	0.0633695	4.19241e-05	0.00996998	0.00527547	0.00996998	210.211	214.955	246.603	323.377	387.506	324.714
ENSMUSG00000004347	Pde1c	1.45971e-07	5.63714e-06	-0.613317	0.116654	7.5963	0.129177	0.000741916	0.0196703	0.00627614	0.0196703	16.7124	20.2696	23.7743	38.9615	33.2618	38.687
ENSMUSG00000025422	Agap2	1.46884e-07	5.66333e-06	-0.436071	0.0829597	8.76898	0.0653063	0.000980267	0.0093432	0.00495706	0.0093432	33.8534	27.5669	28.2908	43.1126	50.0078	44.2605
ENSMUSG00000043259	Fam13c	1.47219e-07	5.66722e-06	0.343002	0.0652591	7.77576	0.0385815	0.000464696	0.00364325	0.00592343	0.00592343	37.5866	36.8063	38.869	24.5576	26.4346	28.9636
ENSMUSG00000003341	Atp8b3	1.49736e-07	5.75495e-06	3.77909	0.719431	1.66274	4.62303	0.0756122	0.347619	0.700759	0.700759	0.232349	0.561153	0.308506	0	0.0166589	0
ENSMUSG00000028184	Adgrl2	1.5105e-07	5.78706e-06	0.364161	0.0693472	7.96257	0.04175	0.00159135	0.000866178	0.0056222	0.0056222	30.9822	34.1193	31.5605	23.621	22.527	21.3874
ENSMUSG00000021557	Agtpbp1	1.51007e-07	5.78706e-06	-0.35144	0.0669241	7.90578	0.0414027	0.00101106	0.00442593	0.00570718	0.00570718	141.798	126.731	147.86	204.569	201.577	173.1
ENSMUSG00000030579	Tyrobp	1.52564e-07	5.83581e-06	0.994707	0.189488	5.47707	0.33992	0.00459589	0.0492628	0.0221736	0.0492628	63.6209	37.5773	49.9993	21.0669	14.4844	15.0189
ENSMUSG00000073616	Cops9	1.53908e-07	5.87791e-06	-0.385481	0.0734555	7.28126	0.0484177	0.00100717	0.00379153	0.00708639	0.00708639	208.99	182.496	214.008	249.476	232.992	214.637
ENSMUSG00000000184	Ccnd2	1.56571e-07	5.9702e-06	1.42558	0.271816	5.15353	0.698347	0.00561906	0.105207	0.0285856	0.105207	18.1801	23.8454	37.2165	7.32876	6.42393	4.07309
ENSMUSG00000030731	Syt3	1.63548e-07	6.22642e-06	-0.431937	0.082484	6.97959	0.0581927	0.00205208	0.000725207	0.00815334	0.00815334	26.8919	25.0261	26.8157	41.7784	36.9676	39.2954
ENSMUSG00000071708	Sms	1.6476e-07	6.26268e-06	-0.352611	0.0673532	7.64291	0.0426209	0.000626888	0.00602381	0.00617779	0.00617779	59.8494	65.1886	59.4929	86.084	77.8026	97.4211
ENSMUSG00000034863	Ano8	1.65166e-07	6.26825e-06	-0.340116	0.0649721	7.85714	0.034931	0.000547565	-0.00026336	0.00578449	0.00578449	21.0394	20.788	21.2151	28.6971	29.3055	29.6357
ENSMUSG00000038555	Reep2	1.6628e-07	6.30065e-06	-0.303961	0.0580793	8.9213	0.0315343	0.000125487	0.00464517	0.00493432	0.00493432	133.882	111.566	124.754	165.597	169.124	158.703
ENSMUSG00000056596	Trnp1	1.7107e-07	6.47202e-06	-0.344861	0.0659603	7.91376	0.0367696	0.000831238	0.000532414	0.0056949	0.0056949	84.5013	83.3747	89.0805	122.108	119.62	111.881
ENSMUSG00000036534	Slc38a7	1.71819e-07	6.49019e-06	0.499763	0.0956028	6.47979	0.0815492	0.00293103	0.00534419	0.0107788	0.0107788	27.1528	22.6682	27.4295	14.4871	16.0471	15.8354
ENSMUSG00000028838	Extl1	1.79607e-07	6.77381e-06	0.993003	0.190256	4.39813	0.327946	0.00513141	0.0350301	0.0491647	0.0491647	14.1358	11.0715	11.453	5.55882	3.45607	3.8447
ENSMUSG00000020150	Gamt	1.8105e-07	6.81757e-06	-0.575113	0.110221	5.98126	0.101373	0.00321447	-0.000531991	0.0150086	0.0150086	13.8415	13.7761	15.448	25.3532	24.4506	24.2019
ENSMUSG00000034902	Pip5k1c	1.83003e-07	6.88039e-06	-0.322256	0.0617843	7.9595	0.0356905	9.92951e-05	0.00557053	0.00562665	0.00562665	119.795	108.826	129.674	161.577	166.356	143.374
ENSMUSG00000036816	Atoh7	1.83376e-07	6.88372e-06	-0.637584	0.122249	5.61937	0.137993	0.0026109	0.0174383	0.0198064	0.0198064	9.35842	9.40997	10.6122	15.1502	22.0773	18.0743
ENSMUSG00000038145	Snrk	1.8829e-07	7.05723e-06	-0.567338	0.108883	7.46645	0.110788	0.000453303	0.0173299	0.00657779	0.0173299	143.1	142.651	165.559	251.219	269.567	220.707
ENSMUSG00000028132	Tmem56	1.89114e-07	7.07714e-06	-0.387608	0.0744007	7.0164	0.0474619	0.000298177	0.00268929	0.00800502	0.00800502	49.0927	52.2498	55.139	67.05	77.5657	68.8406
ENSMUSG00000026721	Rabgap1l	1.98135e-07	7.40327e-06	-0.444249	0.0854147	6.54613	0.0624796	0.00058743	0.00350318	0.0103561	0.0103561	55.8659	54.8327	58.567	80.0602	86.8648	74.7652
ENSMUSG00000029915	Clec5a	2.04143e-07	7.61599e-06	1.67996	0.323347	3.55728	0.972138	0.0515887	0.105241	0.102523	0.105241	5.17125	1.87466	4.39632	0.643865	0.519295	0.675497
ENSMUSG00000027357	Crls1	2.061e-07	7.67713e-06	0.480444	0.0925043	6.5205	0.0795164	0.00146764	0.0113679	0.0105163	0.0113679	42.2717	43.0181	48.9296	23.7718	27.4969	32.0015
ENSMUSG00000062151	Unc13c	2.069e-07	7.69511e-06	-0.368856	0.0710291	9.21855	0.0468706	8.81808e-05	0.00747952	0.00497971	0.00747952	45.8964	44.0973	47.9107	67.3114	73.426	59.3134
ENSMUSG00000032018	Sc5d	2.14102e-07	7.95072e-06	-0.342986	0.0661285	7.70699	0.0385596	0.000508881	0.00357594	0.00605058	0.00605058	52.9026	60.1422	59.866	81.4012	83.4136	75.8908
ENSMUSG00000029055	Plch2	2.15911e-07	8.0056e-06	-0.485171	0.0935705	8.95855	0.0811239	0.000439781	0.0126934	0.00493349	0.0126934	44.1342	49.584	55.6645	72.5543	79.7683	90.3759
ENSMUSG00000066129	Kndc1	2.22395e-07	8.23338e-06	-0.337332	0.0651275	9.03039	0.0392279	0.00013619	0.00622619	0.00493714	0.00622619	67.2806	69.7145	58.6226	88.3544	85.9712	98.3022
ENSMUSG00000039578	Ccser1	2.34053e-07	8.65174e-06	0.675459	0.130649	6.05745	0.157357	0.00406199	0.0215417	0.0142089	0.0215417	25.156	21.0334	26.4183	12.5075	14.3176	9.90298
ENSMUSG00000072844	G530011O06Rik	2.37324e-07	8.75923e-06	0.619902	0.119963	5.7354	0.128691	0.00350551	0.0132534	0.0180812	0.0180812	7.9119	10.5444	8.50674	4.73647	4.24948	5.35385
ENSMUSG00000032330	Cox7a2	2.37784e-07	8.76283e-06	-0.345298	0.0668265	7.53105	0.0358486	0.000276224	-0.00017694	0.00642245	0.00642245	316.143	300.513	309.828	390.802	400.848	399.127
ENSMUSG00000003346	Abhd17a	2.43279e-07	8.9517e-06	-0.348191	0.0674422	7.51436	0.0391962	0.000361123	0.00317022	0.00646156	0.00646156	70.8236	63.6682	62.529	92.6641	91.5426	87.1543
ENSMUSG00000041598	Cdc42ep4	2.44781e-07	8.99328e-06	-0.515766	0.0999226	7.9923	0.0917858	0.000287745	0.0146891	0.00557992	0.0146891	39.3036	45.7215	53.6939	74.4942	81.673	69.4501
ENSMUSG00000035781	R3hdm4	2.45521e-07	9.00677e-06	-0.437412	0.0847519	6.60694	0.0636725	0.000783243	0.00705896	0.00999108	0.00999108	70.1872	63.0484	59.9772	102.138	87.4689	86.0124
ENSMUSG00000048834	Vstm2a	2.58695e-07	9.47568e-06	0.772938	0.150047	7.0033	0.206247	0.00128251	0.0324888	0.00805717	0.0324888	46.6909	47.9342	37.9703	15.6691	20.864	24.339
ENSMUSG00000022389	Tef	2.6291e-07	9.61552e-06	-0.351642	0.068303	7.66964	0.0385075	0.000874327	0.00089057	0.00612362	0.00612362	251.177	201.323	236.384	288.699	291.909	267.967
ENSMUSG00000041014	Nrg3	2.65341e-07	9.68976e-06	0.591579	0.114947	6.51506	0.120845	0.0013863	0.0184329	0.0105508	0.0184329	12.6642	13.0095	15.7266	6.85228	9.21906	6.42339
ENSMUSG00000049092	Gpr137c	2.66829e-07	9.7294e-06	-0.562166	0.109254	5.81147	0.105272	0.000857013	0.0122223	0.0170477	0.0170477	24.4292	18.8224	19.3748	35.3737	36.4742	31.6619
ENSMUSG00000035692	Isg15	2.72943e-07	9.92953e-06	0.89103	0.173311	4.88629	0.270699	0.0103899	0.0302589	0.034665	0.034665	12.0483	20.6146	16.5963	6.1154	6.7864	5.55605
ENSMUSG00000008153	Clstn3	2.73139e-07	9.92953e-06	-0.316032	0.0614718	8.15103	0.0336134	0.000289167	0.0042739	0.005379	0.005379	215.441	217.171	224.39	284.16	309.72	252.476
ENSMUSG00000024827	Gldc	2.75444e-07	9.9983e-06	-0.422192	0.0821462	7.40308	0.0615714	0.000506143	0.00961586	0.00674085	0.00961586	13.3982	12.4918	14.3334	20.2101	23.0168	17.988
ENSMUSG00000049932	H2afx	2.77101e-07	1.00434e-05	-0.62016	0.120692	6.14404	0.132859	0.00235172	0.0194979	0.0133824	0.0194979	8.80415	12.0212	11.6525	17.1218	22.5014	19.463
ENSMUSG00000069814	Ccdc92b	2.77891e-07	1.00569e-05	-0.374537	0.0728974	7.19695	0.0459591	0.000618717	0.00422603	0.00735234	0.00735234	9.66964	8.87924	10.6571	13.5416	14.344	14.1061
ENSMUSG00000025892	Gria4	2.83269e-07	1.02362e-05	-0.471737	0.0918804	10.3032	0.0768911	4.71865e-05	0.0126158	0.00628316	0.0126158	185.174	190.124	225.253	330.272	348.704	283.355
ENSMUSG00000036834	Plch1	3.06708e-07	1.10667e-05	-0.35129	0.0686209	7.64292	0.0393633	0.000885483	0.00204206	0.00617776	0.00617776	11.2388	12.0969	12.6053	17.0247	17.8063	16.7606
ENSMUSG00000028860	Sytl1	3.18402e-07	1.14715e-05	2.04566	0.400151	4.25656	1.44756	0.0560293	0.184152	0.0549489	0.184152	2.79969	3.429	7.04635	0.286526	0.678422	0.620631
ENSMUSG00000022462	Slc38a2	3.22861e-07	1.16148e-05	0.459864	0.0900001	9.67953	0.0731624	5.23837e-05	0.0120977	0.00529539	0.0120977	154.435	158.075	183.809	106.665	116.048	92.6198
ENSMUSG00000074971	Fibin	3.27532e-07	1.17654e-05	0.810421	0.158692	5.80251	0.227254	0.00364215	0.0341326	0.0171656	0.0341326	9.01658	8.77892	12.4832	3.946	5.46746	3.8718
ENSMUSG00000070425	Xntrpc	3.40483e-07	1.22124e-05	1.13316	0.222208	4.99141	0.42421	0.0418787	0.00686508	0.032186	0.032186	1.8156	2.43157	2.2777	0.558958	0.937305	0.627266
ENSMUSG00000015094	Npdc1	3.42287e-07	1.2259e-05	-0.314775	0.0617383	8.0748	0.0314177	0.000247061	0.00186884	0.00547037	0.00547037	172.143	169.023	155.663	206.965	214.297	223.312
ENSMUSG00000045094	Arhgef37	3.46503e-07	1.23916e-05	-0.423228	0.0830475	6.74331	0.0560007	0.00110139	0.00172869	0.00924394	0.00924394	7.25209	8.02536	8.28418	12.1004	12.0081	11.4103
ENSMUSG00000024777	Ppp2r5b	3.49714e-07	1.24879e-05	-0.463453	0.0909717	6.32588	0.0695343	0.000545265	0.005827	0.0118685	0.0118685	93.1409	91.2956	88.2045	122.886	124.639	113.015
ENSMUSG00000022351	Sqle	3.52502e-07	1.25689e-05	-0.316271	0.0620996	8.08937	0.0342609	0.000332348	0.00498346	0.00545219	0.00545219	43.4444	49.1892	42.6561	62.3505	56.7738	64.7155
ENSMUSG00000022516	Nudt16l1	3.56918e-07	1.27076e-05	-0.389104	0.0764357	7.09443	0.0502697	0.00105542	0.00500596	0.00770821	0.00770821	42.2954	38.8276	35.0091	55.3521	52.246	58.2887
ENSMUSG00000003199	Mpnd	3.58349e-07	1.27398e-05	-0.395829	0.0777683	7.1513	0.0542616	0.000751008	0.00832085	0.00750622	0.00832085	54.4236	46.2187	56.11	68.2734	76.1455	77.2787
ENSMUSG00000035722	Abca7	3.62127e-07	1.28552e-05	-0.421254	0.082796	7.84342	0.0614627	0.000460009	0.00982275	0.00580705	0.00982275	10.95	11.3367	9.18808	15.0347	15.0348	17.7463
ENSMUSG00000030786	Itgam	3.63925e-07	1.29001e-05	0.592116	0.1164	5.72782	0.116594	0.00213487	0.0121321	0.0181884	0.0181884	5.52776	4.22161	4.37813	2.8959	2.37061	2.47658
ENSMUSG00000047514	Tspyl1	3.68356e-07	1.30381e-05	-0.296092	0.0582329	8.7744	0.0291636	0.000130892	0.00344703	0.00495571	0.00495571	78.1219	79.4317	85.7583	100.969	114.936	109.307
ENSMUSG00000042675	Ypel3	3.70767e-07	1.31042e-05	-0.423016	0.0832154	8.05108	0.0619926	0.000467045	0.00992017	0.00550071	0.00992017	209.085	165.38	173.124	240.671	256.625	275.055
ENSMUSG00000063229	Ldha	3.75889e-07	1.32659e-05	-0.385456	0.0758655	7.77588	0.0514795	0.000150085	0.00848327	0.00592322	0.00848327	159.913	176.555	164.471	204.698	241.904	256.361
ENSMUSG00000030203	Dusp16	3.91175e-07	1.37852e-05	-0.51759	0.102024	6.45316	0.0928604	0.0019194	0.013694	0.0109561	0.013694	11.9221	10.9352	10.8109	18.674	22.0415	15.8566
ENSMUSG00000034164	Emid1	3.92369e-07	1.38072e-05	-0.559702	0.110338	6.11455	0.108438	0.00460727	0.0134657	0.0136544	0.0136544	18.4818	15.7071	19.6959	30.6382	25.4485	33.7036
ENSMUSG00000022261	Sdc2	3.95699e-07	1.39041e-05	0.3268	0.0644446	7.79103	0.0341375	0.000333237	0.00228938	0.00589642	0.00589642	42.3717	39.0373	37.5911	27.0418	28.9637	29.4345
ENSMUSG00000028444	Cntfr	3.97762e-07	1.39159e-05	-0.452162	0.0891834	6.40176	0.0670918	0.000619229	0.00657655	0.0113113	0.0113113	45.7819	43.9514	43.5615	62.0138	74.8725	59.131
ENSMUSG00000079293	Clec7a	3.96762e-07	1.39159e-05	2.07499	0.409227	3.82497	1.49263	0.027995	0.223205	0.0801541	0.223205	5.42593	4.3256	4.56688	0.639465	0.256805	1.0879
ENSMUSG00000021290	Atp5mpl	3.97635e-07	1.39159e-05	-0.330211	0.0651293	7.86035	0.0376444	0.000583491	0.00558219	0.00577925	0.00577925	506.494	524.73	512.534	619.169	609.072	723.559
ENSMUSG00000031818	Cox4i1	3.98572e-07	1.39241e-05	-0.293099	0.0578147	9.08528	0.0287758	6.92051e-05	0.00368531	0.0049446	0.0049446	1041.76	961.481	878.517	1162.93	1223.51	1207.68
ENSMUSG00000013698	Pea15a	4.05989e-07	1.41628e-05	-0.292111	0.0576596	8.9253	0.026616	5.28062e-05	0.00121892	0.00493414	0.00493414	308.713	306.893	304.066	400.164	410.567	367.492
ENSMUSG00000029304	Spp1	4.18693e-07	1.45684e-05	1.05398	0.208285	7.446	0.385319	0.000685508	0.0643885	0.00662923	0.0643885	78.9147	110.94	143.499	36.6915	30.6852	44.6139
ENSMUSG00000024924	Vldlr	4.18822e-07	1.45684e-05	0.435269	0.0860182	8.75197	0.0657168	0.000141216	0.0109575	0.00496153	0.0109575	101.447	102.357	116.464	71.769	75.4009	60.3858
ENSMUSG00000041741	Pde3a	4.21041e-07	1.46245e-05	0.563631	0.111407	7.30261	0.110198	0.000399507	0.0182179	0.00702264	0.0182179	11.5488	11.5951	13.6226	6.66386	8.39939	6.10309
ENSMUSG00000000056	Narf	4.23455e-07	1.46662e-05	-0.602567	0.119129	5.56412	0.123994	0.000595372	0.0182394	0.0206922	0.0206922	37.5471	27.6804	29.8337	45.1867	50.232	46.9579
ENSMUSG00000025529	Zfp711	4.23213e-07	1.46662e-05	0.435481	0.0860939	6.7659	0.0601832	0.00198926	0.00212344	0.00912897	0.00912897	20.1339	16.9303	18.3023	11.8131	11.5271	12.3981
ENSMUSG00000053329	D10Jhu81e	4.29497e-07	1.48542e-05	-0.402325	0.0795832	6.79836	0.0486268	0.000532264	-0.00044812	0.00896796	0.00896796	57.2864	56.5636	58.1054	83.1813	81.8647	80.2301
ENSMUSG00000037904	Ankrd9	4.39184e-07	1.51675e-05	-0.734677	0.145448	5.87071	0.187311	0.00792705	0.0238055	0.016295	0.0238055	6.35934	7.55647	7.64185	11.5683	15.4828	18.2305
ENSMUSG00000003228	Grk5	4.4048e-07	1.51906e-05	-0.479947	0.0950282	6.90315	0.0799413	0.000979384	0.0125662	0.00847954	0.0125662	10.0921	9.63338	10.0125	18.0544	16.8316	13.1633
ENSMUSG00000041203	Trir	4.42668e-07	1.52443e-05	-0.413472	0.0818817	7.1466	0.0593333	0.000787237	0.00926969	0.00752249	0.00926969	53.694	51.7421	59.5887	69.2022	84.1601	85.9739
ENSMUSG00000005674	Tomm40l	4.43751e-07	1.52599e-05	-0.381168	0.0754914	7.32506	0.0457618	0.00159133	0.00112747	0.00695709	0.00695709	34.3365	38.656	34.8364	51.6076	51.8327	49.8063
ENSMUSG00000024219	Anks1	4.49706e-07	1.54427e-05	-0.414885	0.0822106	6.95802	0.0597308	0.00189499	0.00821996	0.00824287	0.00824287	33.4496	31.6674	35.2949	44.4371	46.2231	56.508
ENSMUSG00000028859	Csf3r	4.55269e-07	1.56115e-05	1.00094	0.198431	4.5482	0.318341	0.0150771	0.00714461	0.0439852	0.0439852	3.31763	2.35324	3.19098	1.16839	0.994436	1.03928
ENSMUSG00000027637	Rab5if	4.63993e-07	1.58882e-05	-0.356165	0.0706588	7.30724	0.0435399	0.000480012	0.00637482	0.00700898	0.00700898	77.8659	72.758	78.1111	96.8188	103.618	116.39
ENSMUSG00000052921	Arhgef15	4.66505e-07	1.59516e-05	-0.554324	0.109994	6.15953	0.10649	0.00490518	0.0129786	0.0132427	0.0132427	9.71427	8.57708	8.86937	18.9577	13.4349	14.5753
ENSMUSG00000042460	C1galt1	4.69741e-07	1.60395e-05	0.384137	0.0762437	7.05454	0.0466009	0.000862639	0.00205306	0.00785701	0.00785701	11.4908	11.3729	12.4568	7.64611	8.14372	8.40761
ENSMUSG00000029528	Pxn	4.75524e-07	1.62141e-05	-0.37186	0.0738413	7.46609	0.048027	0.000631492	0.00754732	0.00657869	0.00754732	42.8379	49.411	44.2288	65.2916	61.9286	73.5411
ENSMUSG00000026121	Sema4c	4.90855e-07	1.67133e-05	-0.413812	0.0822711	6.97277	0.0545918	0.00197138	0.00205327	0.00818143	0.00818143	15.2034	13.7461	15.405	21.7495	20.9826	23.5747
ENSMUSG00000108723	Gm44837	5.09493e-07	1.73235e-05	3.30374	0.657761	1.96434	3.64561	0.130849	0.333167	0.518125	0.518125	3.41485	3.36477	3.59067	0.266424	0.0910767	0
ENSMUSG00000066191	Anks6	5.25782e-07	1.78522e-05	-0.480093	0.0956998	6.79845	0.0801369	0.00316903	0.0105686	0.00896752	0.0105686	6.08951	7.74632	7.84806	12.3045	10.3455	12.0572
ENSMUSG00000027602	Map1lc3a	5.29704e-07	1.79602e-05	-0.344824	0.0687554	7.75965	0.0413439	0.000441621	0.00664934	0.00595241	0.00664934	121.873	115.464	96.7121	146.063	147.628	146.766
ENSMUSG00000078941	Ak6	5.30961e-07	1.79776e-05	0.325358	0.0648798	7.82638	0.0340042	0.00047852	0.00233012	0.00583557	0.00583557	141.12	140.664	149.375	100.751	95.8977	109.981
ENSMUSG00000040048	Ndufb10	5.33644e-07	1.80431e-05	-0.333536	0.0665235	7.56702	0.0360205	0.000297543	0.00301081	0.00634051	0.00634051	251.086	272.355	237.157	324.87	321.628	309.588
ENSMUSG00000038550	Ciart	5.34564e-07	1.8049e-05	1.09377	0.218167	6.29757	0.416019	0.00265273	0.0687426	0.0120871	0.0687426	76.1256	70.6054	98.4258	31.197	30.7728	17.239
ENSMUSG00000018196	Glrx2	5.39306e-07	1.81837e-05	-0.428476	0.0854939	7.0872	0.0638486	0.00212277	0.00884105	0.00773472	0.00884105	62.4979	62.7394	65.3607	83.9346	80.5327	102.261
ENSMUSG00000034614	Pik3ip1	5.51729e-07	1.85767e-05	-0.620309	0.123879	6.14079	0.13385	0.00222037	0.0207985	0.0134119	0.0207985	32.3095	22.6353	21.1076	46.9663	44.4364	39.6946
ENSMUSG00000023169	Slc38a1	5.70101e-07	1.91686e-05	0.29891	0.059769	9.62528	0.0305726	0.000116748	0.00459386	0.00524176	0.00524176	184.76	179.771	203.791	140.922	148.738	128.351
ENSMUSG00000000682	Cd52	5.79435e-07	1.94553e-05	1.79469	0.359085	3.30018	1.09887	0.062177	0.103574	0.131236	0.131236	14.1076	9.54613	11.5159	0.897132	1.88378	2.80587
ENSMUSG00000023947	Nfkbie	5.81227e-07	1.94884e-05	-0.530643	0.106185	6.26385	0.098005	0.00200108	0.0149118	0.0123553	0.0149118	7.29938	5.89229	6.51911	12.2649	11.7456	9.31404
ENSMUSG00000038482	Tfdp1	5.85387e-07	1.95736e-05	0.335324	0.0671188	7.74574	0.03639	0.000779572	0.00254215	0.00597783	0.00597783	68.004	73.1144	74.2323	47.8918	49.5137	53.974
ENSMUSG00000047842	Diras2	5.84988e-07	1.95736e-05	-0.433362	0.08674	9.89939	0.0653694	5.19885e-05	0.0112337	0.00556197	0.0112337	133.614	121.798	138.468	193.567	233.491	181.816
ENSMUSG00000057411	Fam173a	5.94763e-07	1.98597e-05	-0.343925	0.0688828	7.47869	0.040493	0.00056973	0.00568978	0.00654752	0.00654752	96.7661	99.1969	93.598	134.719	143.701	116.383
ENSMUSG00000023832	Acat2	6.09661e-07	2.0329e-05	-0.375253	0.0752291	7.11955	0.0479332	0.000871592	0.0062395	0.00761753	0.00761753	24.1324	24.3823	22.6457	33.3818	30.611	38.7094
ENSMUSG00000023050	Map3k12	6.17479e-07	2.05614e-05	-0.308004	0.0617779	8.1111	0.0292905	0.000299065	0.000739021	0.0054257	0.0054257	70.5699	67.5821	66.9466	88.6999	95.4555	91.6587
ENSMUSG00000020436	Gabrg2	6.25158e-07	2.07884e-05	-0.291026	0.0584005	9.29692	0.0277464	0.000104183	0.00281778	0.00501175	0.00501175	200.632	180.15	185.322	240.251	248.241	267.578
ENSMUSG00000008892	Vdac3	6.47208e-07	2.14921e-05	0.289108	0.0580938	9.04754	0.0267943	0.000123306	0.00202579	0.00493903	0.00493903	361.588	376.277	391.944	265.312	272.446	293.03
ENSMUSG00000006576	Slc4a3	6.48275e-07	2.1498e-05	-0.44598	0.0896217	6.43581	0.0613611	0.000974026	0.00114047	0.0110741	0.0110741	35.1269	30.891	33.0776	46.8853	44.0932	46.9077
ENSMUSG00000020176	Grb10	6.50214e-07	2.15328e-05	0.527635	0.106043	6.13437	0.0970138	0.0032056	0.0136621	0.0134706	0.0136621	36.5514	32.796	29.7942	15.8894	21.4185	19.3897
ENSMUSG00000034271	Jdp2	6.5365e-07	2.16169e-05	0.433188	0.087079	6.85772	0.0653948	0.00217908	0.00919506	0.00868554	0.00919506	29.1602	33.1469	32.2015	18.5068	23.5321	18.7212
ENSMUSG00000021282	Eif5	6.7425e-07	2.22677e-05	0.297895	0.059955	8.52064	0.0294991	0.00033046	0.00326539	0.00506145	0.00506145	375.067	331.76	386.305	264.067	262.947	276.709
ENSMUSG00000034708	Grn	6.80106e-07	2.24305e-05	0.40634	0.0818086	6.70309	0.0549839	0.000584403	0.00622827	0.00945458	0.00945458	72.8574	58.9815	58.4601	39.7089	41.8512	39.9257
ENSMUSG00000051455	Meioc	6.85453e-07	2.25453e-05	1.24247	0.250223	3.92023	0.49869	0.0203408	0.024126	0.0735762	0.0735762	2.34082	2.60026	2.71075	0.655586	1.13404	1.04199
ENSMUSG00000025868	Higd2a	6.85217e-07	2.25453e-05	-0.517936	0.104307	7.45522	0.0935332	0.000592266	0.0157276	0.0066059	0.0157276	156.654	134.473	110.688	219.177	202.876	208.132
ENSMUSG00000029826	Zc3hav1	6.9562e-07	2.28487e-05	0.728707	0.14684	5.98433	0.185179	0.00193343	0.0304097	0.014975	0.0304097	6.02282	6.66281	8.09918	3.58814	3.77369	2.68562
ENSMUSG00000042508	Dmtf1	7.06611e-07	2.31782e-05	0.313694	0.0632506	8.46023	0.030678	0.000901214	0.000544812	0.00509974	0.00509974	88.2203	97.3437	94.1823	67.8725	67.6737	69.0432
ENSMUSG00000028328	Tmod1	7.2567e-07	2.37468e-05	-0.703976	0.142092	5.13867	0.158985	0.00137839	0.0115099	0.0289069	0.0289069	31.1392	28.6481	27.0129	50.4726	47.6322	61.8712
ENSMUSG00000029012	Orc5	7.25911e-07	2.37468e-05	0.394189	0.0795651	6.85624	0.0493564	0.000803526	0.00262247	0.00869239	0.00869239	40.886	37.4016	41.7717	25.3254	28.2058	26.6118
ENSMUSG00000019210	Atp6v1e1	7.27466e-07	2.37655e-05	-0.29247	0.0590386	8.44131	0.0291289	0.000115533	0.00421848	0.0051128	0.0051128	351.687	303.101	288.791	388.575	405.869	427.031
ENSMUSG00000026548	Slamf9	7.53684e-07	2.45798e-05	2.6805	0.541843	2.73971	2.50783	0.156182	0.284209	0.233291	0.284209	2.51276	1.79749	1.80798	0.197101	0.236288	0.0303655
ENSMUSG00000017802	Retreg3	7.54425e-07	2.45798e-05	-0.292792	0.0591882	8.51692	0.0275018	0.000191211	0.00203821	0.00506366	0.00506366	51.4754	50.2202	55.0134	68.6354	72.6713	67.1354
ENSMUSG00000037152	Ndufc1	7.79298e-07	2.5322e-05	-0.494276	0.100046	6.30164	0.0762968	0.00295853	0.000796657	0.0120553	0.0120553	110.946	110.642	105.245	170.296	169.469	147.892
ENSMUSG00000025515	Muc2	7.7862e-07	2.5322e-05	3.20572	0.648845	1.98843	3.58819	0.108514	0.522986	0.50566	0.522986	3.53121	2.05851	3.02119	0.076128	0.300369	0
ENSMUSG00000104348	Gm37691	7.84748e-07	2.54648e-05	0.901818	0.182587	4.69117	0.277891	0.0102787	0.0321065	0.0397281	0.0397281	3.14247	3.85291	2.22435	1.24375	1.30197	1.05643
ENSMUSG00000026156	B3gat2	7.90095e-07	2.5604e-05	-0.527663	0.106862	5.90691	0.0935873	0.00127219	0.0113013	0.015857	0.015857	8.05888	7.15368	6.16845	10.9843	12.5428	12.1933
ENSMUSG00000051451	Crebzf	7.95041e-07	2.57297e-05	-0.566296	0.114714	7.50405	0.111998	0.000714766	0.0190242	0.00648609	0.0190242	93.2117	107.412	105.31	151.243	146.899	191.291
ENSMUSG00000064356	mt-Atp8	7.97075e-07	2.57611e-05	-0.563629	0.114186	9.04637	0.110949	0.000127771	0.0194297	0.00493889	0.0194297	4971.46	6782.72	6181.02	9873.19	9131.66	10569.2
ENSMUSG00000022372	Sla	7.98677e-07	2.57784e-05	-0.569188	0.115321	7.58465	0.113151	0.000596423	0.0193519	0.00630151	0.0193519	29.2632	20.1163	23.5734	38.9124	44.8741	42.208
ENSMUSG00000052957	Gas1	8.25753e-07	2.66168e-05	-0.704889	0.143003	5.84414	0.173601	0.00210209	0.0285729	0.0166271	0.0285729	5.89629	4.90688	5.2731	8.40506	11.0856	13.3053
ENSMUSG00000078853	Igtp	8.43294e-07	2.71305e-05	1.17007	0.237574	5.37558	0.47845	0.00516676	0.0794957	0.0240342	0.0794957	6.09502	12.5004	9.04199	2.52833	3.39442	2.61502
ENSMUSG00000042109	Csdc2	8.43937e-07	2.71305e-05	-0.358168	0.0727256	7.26495	0.0448322	0.00012663	0.0078069	0.00713606	0.0078069	139.025	115.769	128.028	170.824	188.365	147.096
ENSMUSG00000028370	Pappa	8.4848e-07	2.72404e-05	-1.87761	0.381329	5.15761	1.23212	0.00694931	0.211168	0.0284976	0.211168	0.148493	0.329421	0.317426	2.17507	0.932644	2.19808
ENSMUSG00000020572	Nampt	8.61143e-07	2.76102e-05	0.368924	0.0749697	7.02494	0.0428611	0.000459326	0.00207773	0.00797135	0.00797135	77.6392	79.4517	85.0485	51.3772	55.4757	54.2984
ENSMUSG00000031170	Slc38a5	8.67439e-07	2.77385e-05	0.67011	0.136214	5.53029	0.156703	0.00657587	0.0209095	0.0212554	0.0212554	7.23177	8.20777	8.38244	3.30579	3.72727	5.09062
ENSMUSG00000025246	Tbl1x	8.67355e-07	2.77385e-05	0.294492	0.0598613	8.35977	0.0276464	0.000200112	0.00183589	0.00517495	0.00517495	49.025	46.5858	50.9059	35.8993	37.8664	35.6016
ENSMUSG00000038462	Uqcrfs1	8.7317e-07	2.78849e-05	-0.296411	0.0602674	8.30296	0.0287822	0.000224261	0.0028062	0.00522398	0.00522398	132.433	143.704	126.353	166.248	182.757	184.973
ENSMUSG00000032289	Thsd4	8.80632e-07	2.80861e-05	0.486065	0.0988621	6.2854	0.0800402	0.00247773	0.00897545	0.0121828	0.0121828	5.5468	5.03471	6.14901	3.64981	3.61539	2.98308
ENSMUSG00000045215	Asxl3	8.92971e-07	2.84421e-05	0.466669	0.0949699	6.38379	0.0743714	0.00208928	0.00920733	0.0114396	0.0114396	2.44026	2.78876	2.72928	1.49509	1.5991	1.92921
ENSMUSG00000043897	Vmn2r2	9.33728e-07	2.96621e-05	-1.09007	0.222232	5.05283	0.415741	0.0115729	0.0625075	0.0307953	0.0625075	1.35101	0.778017	1.40447	3.19538	4.20782	2.92897
ENSMUSG00000030677	Kif22	9.33632e-07	2.96621e-05	-0.697688	0.142236	5.46188	0.1563	0.00790375	0.00493274	0.022443	0.022443	15.3884	17.18	13.625	25.581	28.3489	31.1905
ENSMUSG00000024851	Pitpnm1	9.46638e-07	3.00328e-05	-0.372406	0.0759637	7.69693	0.0485304	0.000431137	0.00822459	0.00606996	0.00822459	125.981	105.226	103.627	164.588	155.351	145.205
ENSMUSG00000051504	Siglech	9.78664e-07	3.10081e-05	0.802302	0.163873	5.50033	0.225332	0.00743883	0.0328427	0.0217676	0.0328427	8.72833	11.0118	7.58649	3.14593	4.74486	4.20652
ENSMUSG00000013921	Clip3	9.94452e-07	3.14671e-05	-0.497037	0.101587	8.60968	0.0864977	0.000222263	0.0152576	0.0050143	0.0152576	420.597	359.111	443.879	619.449	701.961	568.412
ENSMUSG00000036561	Ppp6r2	9.96303e-07	3.14845e-05	-0.288249	0.058918	8.68776	0.0264195	0.000225065	0.00164156	0.00498194	0.00498194	84.079	75.5134	77.574	102.095	105.632	105.646
ENSMUSG00000022696	Sidt1	9.99323e-07	3.15387e-05	-0.565393	0.11558	6.53984	0.111931	0.00323996	0.0167983	0.0103951	0.0167983	13.6289	14.4901	10.3861	23.574	19.7025	22.796
ENSMUSG00000023452	Pisd	1.00822e-06	3.17779e-05	-0.590551	0.120766	8.09579	0.122127	0.000493406	0.0213834	0.00544428	0.0213834	48.7839	44.7653	50.5202	97.0447	67.7024	94.119
ENSMUSG00000021451	Sema4d	1.02836e-06	3.23704e-05	-0.404394	0.0827636	6.65335	0.0508866	0.000548608	0.00173427	0.00972611	0.00972611	65.3382	70.2197	65.4238	92.7041	96.5328	88.5738
ENSMUSG00000020120	Plek	1.03576e-06	3.25613e-05	0.538636	0.11027	6.75056	0.10163	0.00105174	0.0171873	0.00920677	0.0171873	15.6498	11.2273	13.1954	7.91005	8.35584	6.90924
ENSMUSG00000007783	Cpt1c	1.04788e-06	3.28993e-05	-0.338011	0.0692301	7.88329	0.0367963	0.00144682	0.00170425	0.0057424	0.0057424	30.4519	31.2451	31.5815	40.3656	42.8166	47.1917
ENSMUSG00000085156	Snhg15	1.11617e-06	3.49525e-05	0.82602	0.169615	4.92285	0.210268	0.00936703	-0.00239751	0.0337869	0.0337869	27.3196	24.6448	24.4242	9.84796	12.1756	10.3838
ENSMUSG00000008822	Acyp1	1.11484e-06	3.49525e-05	-0.488108	0.100223	6.67644	0.0835284	0.00133388	0.0137332	0.00959852	0.0137332	74.4224	64.7045	83.0847	128.122	100.836	106.635
ENSMUSG00000041995	Zbed3	1.14222e-06	3.5722e-05	0.500345	0.102837	6.23789	0.0854404	0.0032955	0.00962541	0.0125678	0.0125678	12.6973	15.0677	14.5659	8.09989	9.74821	7.53097
ENSMUSG00000028037	Ifi44	1.14471e-06	3.57536e-05	1.15764	0.237953	3.98994	0.462126	0.0157945	0.0593168	0.0691381	0.0691381	2.23974	3.96908	3.41192	0.745275	1.22108	0.978088
ENSMUSG00000044024	Rell2	1.18681e-06	3.70207e-05	-0.371886	0.0765541	8.11832	0.0485225	0.000457851	0.00833293	0.00541708	0.00833293	64.2279	53.6289	53.4792	74.3087	83.1536	85.0267
ENSMUSG00000050373	Snx21	1.19408e-06	3.71995e-05	-0.352402	0.0725611	7.34166	0.0387648	0.000988078	0.000897853	0.00690959	0.00690959	33.8158	30.731	31.8846	43.1213	45.0484	46.217
ENSMUSG00000006519	Cyba	1.19578e-06	3.72047e-05	0.883515	0.18193	4.99991	0.273898	0.00841153	0.0412365	0.0319914	0.0412365	19.5164	16.5427	20.0764	10.1468	6.74634	5.77335
ENSMUSG00000025650	Col7a1	1.20142e-06	3.73319e-05	1.47837	0.304478	4.37644	0.766918	0.0177622	0.121299	0.0499882	0.121299	10.8203	17.076	15.3065	4.62401	4.32645	2.07687
ENSMUSG00000059013	Sh2d3c	1.20577e-06	3.7371e-05	-0.726252	0.149598	5.50554	0.185088	0.00245206	0.0311173	0.0216776	0.0311173	14.2241	10.131	10.929	26.6557	24.1826	18.4406
ENSMUSG00000057706	Mex3b	1.20439e-06	3.7371e-05	0.5573	0.114791	6.61098	0.108987	0.00119207	0.0185734	0.00996756	0.0185734	10.7141	12.1658	14.2435	5.98536	7.44902	7.76435
ENSMUSG00000022309	Angpt1	1.21594e-06	3.7638e-05	0.381573	0.0786259	6.9099	0.0500365	0.000823345	0.00712296	0.00844971	0.00844971	24.6257	20.8486	21.5382	13.7259	15.9239	16.1734
ENSMUSG00000097317	Gm17281	1.23713e-06	3.82451e-05	-0.820931	0.169278	4.94528	0.236565	0.00826987	0.0347129	0.0332569	0.0347129	1.35187	0.809404	1.02723	2.63544	2.50262	1.98895
ENSMUSG00000014592	Camta1	1.25513e-06	3.86787e-05	-0.287082	0.0592321	8.9134	0.0270327	0.000327919	0.00255695	0.00493474	0.00493474	140.407	138.413	125.325	171.628	187.507	175.888
ENSMUSG00000029559	2210016L21Rik	1.25596e-06	3.86787e-05	-0.588416	0.121408	7.09932	0.121558	0.00253556	0.0195743	0.00769037	0.0195743	54.3023	50.0827	41.1215	83.7369	71.3861	96.2203
ENSMUSG00000029605	Oas1b	1.25443e-06	3.86787e-05	1.57078	0.324083	4.45642	0.866241	0.0317722	0.125773	0.0470519	0.125773	2.99096	5.34583	5.17602	0.561355	1.42986	0.803381
ENSMUSG00000029009	Mthfr	1.26502e-06	3.89084e-05	0.40127	0.0828185	6.96915	0.0494382	0.00209191	-0.000675678	0.00819644	0.00819644	23.5574	23.9473	23.1152	15.417	16.4092	15.1857
ENSMUSG00000037730	Mynn	1.27079e-06	3.9036e-05	0.486799	0.10049	7.72318	0.0832098	0.00496191	0.0101853	0.00601982	0.0101853	37.0594	42.0648	45.0618	22.1561	25.4045	29.1253
ENSMUSG00000022098	Bmp1	1.30871e-06	4.01499e-05	-0.529302	0.109395	8.59987	0.0984089	0.000744829	0.0172062	0.00501896	0.0172062	47.2723	42.4203	35.8961	73.2473	60.6405	76.7385
ENSMUSG00000079363	Gbp4	1.34571e-06	4.12325e-05	1.15297	0.238568	3.94578	0.467101	0.011528	0.0738442	0.0719151	0.0738442	1.8247	2.64064	2.26865	0.6484	1.01827	0.483369
ENSMUSG00000042066	Tmcc2	1.35139e-06	4.13543e-05	-0.283708	0.0587139	8.71992	0.0253529	0.000199965	0.00130733	0.00497102	0.00497102	62.9028	60.0814	61.8725	78.3553	85.506	78.9795
ENSMUSG00000039349	C130074G19Rik	1.38723e-06	4.23437e-05	0.549384	0.113819	6.43968	0.106093	0.00152128	0.0179108	0.0110476	0.0179108	9.1969	10.9394	9.636	5.73514	6.66001	4.6546
ENSMUSG00000021364	Elovl2	1.38555e-06	4.23437e-05	-0.485306	0.100538	7.69622	0.0827862	0.000513319	0.0146486	0.00607132	0.0146486	20.8161	18.4931	22.8383	33.7126	38.0212	29.4817
ENSMUSG00000026058	Khdrbs2	1.40164e-06	4.27093e-05	0.493985	0.102385	6.57604	0.0768808	0.00555015	-0.000957084	0.0101739	0.0101739	18.5951	19.3156	21.4215	12.7836	11.6959	11.3892
ENSMUSG00000044788	Fads6	1.40451e-06	4.27093e-05	-0.298082	0.0617868	8.05498	0.031237	0.000217921	0.00550849	0.00549566	0.00550849	31.1538	27.6159	31.4034	41.2637	42.5298	36.8018
ENSMUSG00000007035	Msh5	1.40334e-06	4.27093e-05	-1.13535	0.235329	4.9303	0.431429	0.0494593	0.00644467	0.0336101	0.0336101	2.20376	3.18725	1.59058	7.04898	6.00884	7.43295
ENSMUSG00000026959	Grin1	1.41127e-06	4.28611e-05	-0.283893	0.0588573	9.37227	0.0268276	0.000145606	0.00316569	0.00505067	0.00505067	100.965	90.2702	93.8147	128.47	129.491	118.167
ENSMUSG00000046879	Irgm1	1.42939e-06	4.3357e-05	1.00871	0.20924	6.31685	0.357789	0.00178236	0.0638894	0.0119376	0.0638894	15.3043	21.7323	17.2006	6.45078	8.75982	4.64549
ENSMUSG00000079442	St6galnac4	1.44875e-06	4.38891e-05	-0.31603	0.0655912	8.46382	0.0351252	0.000421202	0.00603211	0.00509732	0.00603211	46.3694	52.2316	57.5255	68.1541	73.2528	69.7588
ENSMUSG00000039735	Fnbp1l	1.46856e-06	4.44335e-05	0.418789	0.0869675	7.5829	0.0616914	0.0012765	0.0100685	0.00630535	0.0100685	34.6575	32.0959	31.2684	18.7455	21.4643	24.9412
ENSMUSG00000096351	Samd11	1.47505e-06	4.45741e-05	1.37881	0.286382	4.41455	0.64159	0.0744668	0.014601	0.0485553	0.0485553	2.87394	2.15644	3.27423	1.17	0.461133	0.705214
ENSMUSG00000020884	Asgr1	1.48746e-06	4.48929e-05	-0.651532	0.135372	5.57136	0.142409	0.00691454	0.011911	0.0205737	0.0205737	8.22497	6.12714	8.52474	13.4769	14.4435	13.4894
ENSMUSG00000022421	Nptxr	1.49206e-06	4.49759e-05	-0.349142	0.0725521	9.70334	0.0428867	0.000154598	0.00774112	0.0053204	0.00774112	89.0225	91.618	104.506	122.383	146.541	132.173
ENSMUSG00000031574	Star	1.5008e-06	4.51266e-05	0.519306	0.107938	6.30638	0.0843905	0.00545766	-0.00109902	0.0120184	0.0120184	13.2738	13.2818	14.3816	8.27679	8.51492	7.43788
ENSMUSG00000031604	Msmo1	1.49902e-06	4.51266e-05	-0.409617	0.0851353	7.55463	0.0590335	0.000893748	0.00997828	0.00636839	0.00997828	55.9753	73.4527	61.1825	88.2224	96.8153	94.4784
ENSMUSG00000018339	Gpx3	1.54341e-06	4.63503e-05	0.976182	0.203137	5.14811	0.335397	0.00663277	0.0552643	0.0287025	0.0552643	26.3092	21.3838	13.3778	7.42822	6.66486	6.89853
ENSMUSG00000105703	Gm43305	1.558e-06	4.67305e-05	-0.474745	0.09883	10.8769	0.0793355	1.26855e-05	0.0146384	0.00797054	0.0146384	582.265	502.996	633.148	884.545	1039.84	811.925
ENSMUSG00000074252	Gm10654	1.56732e-06	4.69518e-05	0.951814	0.198193	4.88472	0.318922	0.00707848	0.0518424	0.0347032	0.0518424	7.31046	4.52577	4.19275	1.97121	2.3094	1.64606
ENSMUSG00000084010	Gm13302	1.57579e-06	4.71469e-05	-2.78206	0.57943	3.44945	2.72485	0.202153	0.301455	0.113546	0.301455	0.26266	0.343952	0.0468161	2.28215	3.61791	2.79376
ENSMUSG00000031661	Nkd1	1.57788e-06	4.71511e-05	0.517692	0.107828	7.17538	0.0943536	0.00207305	0.0153671	0.00742417	0.0153671	18.4368	19.3207	23.5495	12.3521	13.4539	10.2839
ENSMUSG00000003660	Snrnp200	1.5811e-06	4.71891e-05	0.513831	0.107033	6.58919	0.0929539	0.000431715	0.0167522	0.0100955	0.0167522	76.5366	72.3462	88.7662	45.9833	51.6039	38.3959
ENSMUSG00000034868	Myl12b	1.58624e-06	4.72839e-05	-0.361892	0.0753933	8.35256	0.0461107	0.0013759	0.00715033	0.00518091	0.00715033	240.263	246.346	212.402	301.11	300.078	357.414
ENSMUSG00000034771	Tle2	1.59949e-06	4.76204e-05	-0.688443	0.143474	6.38806	0.166888	0.00449625	0.0263809	0.0114089	0.0263809	26.4625	22.631	22.7399	55.6682	35.921	47.0193
ENSMUSG00000044700	Tmem201	1.60638e-06	4.77079e-05	-0.454089	0.0946507	8.47753	0.0726096	0.000369757	0.0130684	0.00508825	0.0130684	40.2766	32.3878	35.6009	59.7491	60.3899	48.9119
ENSMUSG00000048939	Atp13a5	1.60627e-06	4.77079e-05	0.405775	0.0845799	6.74024	0.0535932	0.00147091	0.0037756	0.00925972	0.00925972	9.56217	9.99514	11.2944	6.66021	7.13474	6.77105
ENSMUSG00000033880	Lgals3bp	1.62923e-06	4.83273e-05	0.726427	0.151506	5.1466	0.16581	0.005696	0.00368066	0.0287353	0.0287353	20.7481	22.5218	20.4466	9.10834	11.1684	8.90991
ENSMUSG00000024857	Cabp2	1.63883e-06	4.85523e-05	-1.44843	0.302163	4.98352	0.738944	0.0352521	0.101702	0.0323674	0.101702	5.76534	2.49952	6.14177	16.625	22.1769	17.0223
ENSMUSG00000031445	Proz	1.70513e-06	5.04547e-05	0.555451	0.116068	5.79455	0.102857	0.00293659	0.00993728	0.0172711	0.0172711	7.3679	9.09757	9.17531	4.72047	5.86272	5.13349
ENSMUSG00000059974	Ntm	1.73622e-06	5.13118e-05	-0.285821	0.0597711	8.30244	0.0272103	0.000134419	0.00324337	0.00522445	0.00522445	219.452	215.298	244.116	272.196	297.325	294.391
ENSMUSG00000042729	Wdr74	1.75317e-06	5.17495e-05	0.374859	0.0784229	6.97711	0.0438607	0.00106168	0.00106939	0.00816354	0.00816354	48.5278	51.0751	53.4211	34.0714	32.3843	34.9682
ENSMUSG00000020321	Mdh1	1.76496e-06	5.20037e-05	-0.279117	0.0584094	8.82819	0.0258543	0.000172962	0.00293005	0.00494453	0.00494453	713.497	680.072	682.133	832.539	811.135	940.498
ENSMUSG00000033871	Ppargc1b	1.76823e-06	5.20037e-05	-0.568002	0.118872	6.80288	0.113745	0.00282851	0.0183674	0.00894591	0.0183674	5.52084	7.23371	8.12108	10.6845	12.4405	12.5277
ENSMUSG00000062184	Hs6st2	1.76638e-06	5.20037e-05	0.327005	0.068433	7.6868	0.0375536	0.000934923	0.0059075	0.00608969	0.00608969	25.5362	31.2261	28.7058	20.0326	19.625	21.7533
ENSMUSG00000015092	Edf1	1.79413e-06	5.27013e-05	-0.301967	0.0632347	7.98244	0.0277707	0.00040417	0.000115301	0.00559378	0.00559378	181.985	189.253	190.729	240.175	236.417	243.018
ENSMUSG00000065947	mt-Nd4l	1.80823e-06	5.3051e-05	-0.51728	0.108359	9.81382	0.0943635	5.94048e-05	0.0175531	0.00544856	0.0175531	6352.27	6364.48	8511.76	11255	11605.5	9034.44
ENSMUSG00000061232	H2-K1	1.85475e-06	5.43497e-05	0.573196	0.120201	6.0637	0.115904	0.00137291	0.0202996	0.0141464	0.0202996	31.9784	36.6194	33.0341	18.5748	21.8226	15.6438
ENSMUSG00000036427	Gpi1	1.86806e-06	5.46736e-05	-0.32193	0.0675302	8.3298	0.036564	0.000274438	0.00656605	0.00520022	0.00656605	309.719	282.749	246.371	364.013	375.447	357.927
ENSMUSG00000098979	Gm27544	1.88725e-06	5.51683e-05	0.965013	0.202515	4.43471	0.319656	0.0136961	0.0366557	0.0478225	0.0478225	187.951	229.018	167.773	54.9237	75.8703	99.6102
ENSMUSG00000055707	Klhl26	1.91587e-06	5.59375e-05	-0.330529	0.0694083	7.43634	0.0339333	0.000572357	0.000875675	0.00665391	0.00665391	18.2282	18.867	19.1694	24.8784	25.7684	27.8783
ENSMUSG00000040812	Agbl2	1.94836e-06	5.68175e-05	-0.501896	0.105469	6.06498	0.0836933	0.00255203	0.00760211	0.0141336	0.0141336	4.15922	4.14917	4.40137	7.51756	7.55563	5.9637
ENSMUSG00000053166	Cdh22	1.97811e-06	5.76153e-05	-0.528472	0.111125	7.73547	0.0986033	0.000584678	0.0179385	0.00599681	0.0179385	20.0814	18.5919	22.5287	33.6598	40.6703	29.6155
ENSMUSG00000062960	Kdr	1.98265e-06	5.76782e-05	0.470567	0.0989586	6.97915	0.0781812	0.00039988	0.0142893	0.00815516	0.0142893	12.6403	14.5091	16.0931	8.15626	8.48292	10.0706
ENSMUSG00000016559	H3f3b	1.99289e-06	5.79064e-05	0.426839	0.0897825	9.99377	0.0643305	3.23716e-05	0.012059	0.00570212	0.012059	1095.79	1022.32	1037.16	615.443	620.56	808.557
ENSMUSG00000059277	R74862	1.99716e-06	5.79609e-05	-0.51603	0.108553	5.94627	0.0831447	0.00227629	0.0017971	0.0153993	0.0153993	6.18786	5.53975	5.22579	9.51062	9.51645	8.95595
ENSMUSG00000036469	March1	2.01062e-06	5.82814e-05	0.618954	0.130242	5.56094	0.124176	0.00469982	0.00685616	0.0207445	0.0207445	5.75816	5.26863	4.10902	2.67784	3.0791	2.96579
ENSMUSG00000100021	Gm18697	2.01774e-06	5.84177e-05	3.6947	0.777563	1.52017	4.27097	0.10018	0.119482	0.806726	0.806726	0.694529	0.472648	0.561777	0	0.0197081	0
ENSMUSG00000068566	Myadm	2.05801e-06	5.95126e-05	-0.330598	0.0696342	7.57099	0.0386073	0.00071217	0.00656121	0.00633167	0.00656121	21.3129	26.6325	23.2822	31.0506	32.8268	33.959
ENSMUSG00000026817	Ak1	2.08827e-06	6.03154e-05	-0.37419	0.078865	7.5928	0.0494691	0.00145357	0.00787597	0.00628373	0.00787597	51.729	44.3695	49.1157	75.2548	70.0715	60.038
ENSMUSG00000095595	Fam177a	2.10544e-06	6.07386e-05	-1.63719	0.345177	6.72183	0.947089	0.0908156	0.0879052	0.00935546	0.0879052	2.98468	5.29495	5.08067	12.8011	33.9523	25.2534
ENSMUSG00000070420	Zscan25	2.13756e-06	6.15185e-05	0.434421	0.0916507	6.49766	0.0661354	0.00193747	0.0099611	0.0106623	0.0106623	17.3226	14.6637	18.1811	10.5848	11.7923	9.85345
ENSMUSG00000042978	Sbk1	2.13626e-06	6.15185e-05	-0.441126	0.0930629	7.57245	0.0687706	0.000144474	0.0128466	0.00632843	0.0128466	207.775	198.768	238.47	311.338	350.301	266.577
ENSMUSG00000024378	Stard4	2.15332e-06	6.18984e-05	-0.613777	0.12953	5.97985	0.13315	0.00125229	0.0239149	0.0150241	0.0239149	14.017	16.59	19.1121	33.151	31.6293	24.3613
ENSMUSG00000032135	Mcam	2.17814e-06	6.25374e-05	-0.442868	0.0935079	6.4979	0.069332	0.000746338	0.0123693	0.0106608	0.0123693	28.6425	30.1664	24.2993	44.4519	36.3497	42.4537
ENSMUSG00000000031	H19	2.19323e-06	6.28961e-05	-1.05743	0.223333	4.46533	0.395299	0.0132137	0.0616029	0.0467406	0.0616029	1.54181	2.02059	2.47675	5.5953	4.90946	6.1083
ENSMUSG00000028794	A3galt2	2.22029e-06	6.35967e-05	1.37188	0.289899	5.71481	0.665463	0.00429115	0.121771	0.0183742	0.121771	4.92333	11.3359	10.5887	1.98395	2.64293	1.79079
ENSMUSG00000031511	Arhgef7	2.22732e-06	6.37224e-05	-0.277807	0.0587129	8.88309	0.0259806	0.000233697	0.0033007	0.00493711	0.00493711	114.524	111.364	123.623	149.866	162.157	144.164
ENSMUSG00000032118	Fez1	2.24993e-06	6.42932e-05	-0.295573	0.0624947	8.57408	0.0308958	0.000138594	0.00571979	0.00503183	0.00571979	362.7	389.515	363.025	456.693	453.266	515.964
ENSMUSG00000022890	Atp5j	2.25894e-06	6.44744e-05	-0.295048	0.0623943	8.02521	0.0297174	0.000304704	0.00419718	0.00553486	0.00553486	445.293	470.688	401.812	521.163	534.281	560.956
ENSMUSG00000111092	Gm17875	2.2694e-06	6.46965e-05	0.889451	0.188131	4.60353	0.246797	0.0108197	0.00100618	0.0422703	0.0422703	8.77704	9.79923	7.42827	3.48729	3.10512	3.67958
ENSMUSG00000034880	Mrpl34	2.27845e-06	6.48782e-05	-0.483821	0.102352	6.13491	0.0811389	0.00224835	0.0113942	0.0134657	0.0134657	34.6138	45.5536	46.0447	60.7267	58.6739	63.9694
ENSMUSG00000111202	Gm48275	2.28542e-06	6.49999e-05	-0.785347	0.166162	6.69558	0.218163	0.00845591	0.0329588	0.00949476	0.0329588	279.567	215.256	397.338	487.745	641.089	590.224
ENSMUSG00000049336	Tenm2	2.3383e-06	6.64257e-05	0.521969	0.110546	6.0689	0.0930997	0.00423592	0.00996927	0.0140946	0.0140946	11.4189	8.28487	8.43955	5.43615	5.91517	5.37334
ENSMUSG00000030268	Bcat1	2.35774e-06	6.68996e-05	0.376193	0.0797009	6.86128	0.0499293	0.000859298	0.00848185	0.00866906	0.00866906	82.9079	103.623	89.842	56.1242	65.6651	58.3351
ENSMUSG00000031791	Tmem38a	2.39347e-06	6.78337e-05	-0.342085	0.0725218	7.13809	0.0386476	0.000337003	0.00408909	0.00755211	0.00755211	67.5329	61.806	64.672	89.8436	93.8188	81.8854
ENSMUSG00000051379	Flrt3	2.43959e-06	6.90597e-05	-0.447202	0.0948846	6.93878	0.0708005	0.000989456	0.0125152	0.00832437	0.0125152	9.79901	13.2379	11.1051	17.2112	16.6422	19.1566
ENSMUSG00000021822	Plau	2.45684e-06	6.94667e-05	1.13576	0.241052	3.95311	0.391906	0.0157133	-0.00956323	0.071446	0.071446	2.15763	2.23226	2.08802	0.634613	0.763259	0.644733
ENSMUSG00000022756	Slc7a4	2.46282e-06	6.95545e-05	-0.549253	0.116585	6.2645	0.0987642	0.00803802	0.00228773	0.01235	0.01235	9.06793	9.74354	9.57927	17.213	13.7572	17.3452
ENSMUSG00000024897	Apba1	2.47638e-06	6.98558e-05	-0.274171	0.0582095	8.96401	0.0250583	0.000148996	0.00298534	0.00493352	0.00493352	37.1418	34.8371	38.1332	45.7308	51.2828	47.2814
ENSMUSG00000056201	Cfl1	2.4806e-06	6.98935e-05	-0.294523	0.0625351	10.0574	0.027678	5.99925e-05	0.00200861	0.00580597	0.00580597	443.051	482.02	472.719	594.216	607.612	643.844
ENSMUSG00000009741	Ubp1	2.51885e-06	7.08885e-05	0.289678	0.0615473	8.44479	0.0290724	0.000571748	0.00430114	0.00511036	0.00511036	104.463	97.7147	112.208	71.7559	78.9678	81.8394
ENSMUSG00000028145	Them4	2.54463e-06	7.15307e-05	0.303262	0.0644619	7.83091	0.0292466	0.000405068	0.00166523	0.00582793	0.00582793	85.1524	85.9408	77.4813	58.8617	62.899	59.2699
ENSMUSG00000032554	Trf	2.55751e-06	7.18092e-05	-0.3715	0.078984	8.85612	0.0488899	0.00043485	0.00892285	0.00494025	0.00892285	415.339	518.143	492.017	714.437	627.926	610.685
ENSMUSG00000024121	Atp6v0c	2.56856e-06	7.2036e-05	-0.272413	0.057928	9.23127	0.0261221	4.91497e-05	0.00477517	0.00498433	0.00498433	742.272	679.33	609.544	826.623	857.589	830.437
ENSMUSG00000032714	Syde1	2.60517e-06	7.29779e-05	0.426493	0.0907486	6.47662	0.0610135	0.00155328	0.00650249	0.0107997	0.0107997	9.00589	8.42305	8.40285	5.52589	6.28319	4.93642
ENSMUSG00000026610	Esrrg	2.63316e-06	7.36768e-05	-0.291619	0.0620791	8.61579	0.0301371	0.000552684	0.00522804	0.00501147	0.00522804	44.3816	42.3549	46.6331	55.4146	65.6892	57.6136
ENSMUSG00000034663	Bmp2k	2.65244e-06	7.41303e-05	0.358618	0.0763659	7.10249	0.0398249	0.00106877	0.000484898	0.00767885	0.00767885	12.0984	11.9537	12.6784	8.38276	8.95207	8.41972
ENSMUSG00000035486	Plk5	2.68016e-06	7.48185e-05	-1.02896	0.219212	6.58324	0.375295	0.00224068	0.0698402	0.0101309	0.0698402	12.7763	9.02107	8.58756	34.7198	30.8681	19.4738
ENSMUSG00000032446	Eomes	2.68472e-06	7.48593e-05	-0.939515	0.20017	6.93964	0.312888	0.00117696	0.0589254	0.00832071	0.0589254	6.07884	10.5469	9.48191	17.2502	24.1313	23.8936
ENSMUSG00000020486	Sept4	2.77801e-06	7.73714e-05	-0.283607	0.0605146	9.76705	0.0255708	0.000101169	0.00170004	0.00539185	0.00539185	546.107	538.864	589.53	697.148	739.816	722.747
ENSMUSG00000032846	Zswim6	2.90216e-06	8.07362e-05	0.410988	0.0878624	6.64989	0.0528375	0.00183424	0.000871132	0.00974547	0.00974547	9.13138	9.69403	8.60296	5.65194	6.29047	6.28158
ENSMUSG00000057101	Zfp180	2.94196e-06	8.17493e-05	0.520352	0.111309	8.16056	0.0960976	0.000526931	0.0180577	0.00536824	0.0180577	41.5169	48.985	59.4698	29.1746	31.1719	27.9259
ENSMUSG00000038065	Mturn	2.95369e-06	8.19811e-05	-0.45052	0.0963883	6.10644	0.061345	0.000205218	0.000362919	0.0137308	0.0137308	36.6116	35.412	34.2697	50.8128	53.8059	51.8576
ENSMUSG00000000278	Scpep1	2.99201e-06	8.28543e-05	0.487516	0.104363	6.8596	0.0843714	0.000949652	0.0153877	0.0086768	0.0153877	24.0021	23.7113	28.0098	14.5426	18.1087	13.6606
ENSMUSG00000005262	Ufd1	2.99023e-06	8.28543e-05	0.341638	0.0731326	7.1505	0.0391859	0.000513582	0.00470006	0.00750899	0.00750899	138.557	118.878	129.675	93.2767	81.1913	83.4957
ENSMUSG00000113673	Gm47486	3.11527e-06	8.6169e-05	0.398782	0.0855191	6.82443	0.0540152	0.00212825	0.00575565	0.00884203	0.00884203	12.1256	14.5412	12.7334	8.46058	8.13811	9.72418
ENSMUSG00000030107	Usp18	3.16606e-06	8.74737e-05	1.30092	0.279184	3.71757	0.601254	0.0087691	0.108146	0.0883753	0.108146	6.86045	10.9685	8.26756	2.44921	3.09392	1.36568
ENSMUSG00000050914	Ankrd37	3.28982e-06	9.07891e-05	-0.94892	0.203988	5.52075	0.320068	0.0101372	0.0522794	0.0214172	0.0522794	14.2487	12.2171	10.4074	24.1833	24.9394	42.3516
ENSMUSG00000106767	Gm42727	3.36262e-06	9.26924e-05	0.886984	0.190859	5.0376	0.279735	0.00873579	0.0459049	0.0311369	0.0459049	3.94969	3.51266	4.6311	1.3192	2.28747	1.45854
ENSMUSG00000104713	Gbp6	3.39631e-06	9.35146e-05	1.22218	0.263101	6.3692	0.531182	0.00593792	0.0978956	0.0115455	0.0978956	8.68535	16.0186	12.7431	3.11458	5.14683	2.79475
ENSMUSG00000062345	Serpinb2	3.47245e-06	9.55023e-05	-0.835788	0.1801	4.63355	0.234419	0.00727693	0.0237941	0.041377	0.041377	2.24484	2.8304	3.54828	5.70515	6.417	7.13121
ENSMUSG00000026972	Arrdc1	3.52103e-06	9.67282e-05	-0.707369	0.152522	5.21688	0.160762	0.00766377	0.00564995	0.0272306	0.0272306	8.38636	7.57561	8.91119	15.4309	16.7771	14.2101
ENSMUSG00000058558	Rpl5	3.61481e-06	9.91918e-05	0.358936	0.0774841	7.01971	0.0416496	0.00101374	0.00273517	0.00799194	0.00799194	98.2926	99.7591	100.848	59.51	69.6827	69.4963
ENSMUSG00000050357	Carmil2	3.68042e-06	0.000100878	-0.42481	0.0917783	7.65494	0.0642471	0.000559677	0.0120752	0.00615321	0.0120752	27.076	21.9399	21.4275	32.7529	34.4263	38.3014
ENSMUSG00000067369	Trmt2b	3.69905e-06	0.000101274	-0.350324	0.075703	7.16158	0.0375207	0.00112546	-0.000247182	0.00747095	0.00747095	14.6453	14.5433	15.3001	20.9453	20.3402	21.6335
ENSMUSG00000000308	Ckmt1	3.71987e-06	0.000101728	-0.611266	0.132124	7.7396	0.133042	0.000313314	0.0258719	0.00598916	0.0258719	141.793	123.79	99.837	193.458	197.427	232.383
ENSMUSG00000029782	Tmem209	3.73307e-06	0.000101974	0.361768	0.0782081	7.13417	0.0448759	0.00160892	0.00540727	0.00756584	0.00756584	43.3708	38.1187	43.8537	30.0283	30.5177	26.1443
ENSMUSG00000026424	Gpr37l1	3.92764e-06	0.000107004	-0.353455	0.0765854	9.94769	0.0445175	4.58592e-05	0.00875213	0.00563167	0.00875213	283.905	272.166	297.072	408.594	446.725	349.188
ENSMUSG00000062785	Kcnc3	3.93048e-06	0.000107004	-0.61881	0.134086	9.737	0.136452	0.000109241	0.0268593	0.00535732	0.0268593	153.531	142.81	201.295	310.721	342.656	259.261
ENSMUSG00000024769	Cdc42bpg	3.92223e-06	0.000107004	-0.356544	0.0772498	7.25182	0.0451634	0.00177466	0.00700839	0.00717664	0.00717664	13.8428	11.4394	13.3476	16.5871	19.3369	18.7339
ENSMUSG00000028517	Plpp3	3.9361e-06	0.000107036	-0.26913	0.0583198	9.29193	0.0230533	9.23523e-05	0.00156263	0.00500945	0.00500945	124.342	120.961	124.054	153.922	169.716	153.347
ENSMUSG00000084241	Gm13416	3.97756e-06	0.000108042	0.981884	0.212872	4.32307	0.342579	0.0158654	0.050822	0.0521065	0.0521065	4.45515	4.30434	4.63604	1.08512	1.90205	2.16283
ENSMUSG00000021390	Ogn	3.99657e-06	0.000108437	0.558262	0.121057	6.93557	0.111083	0.000901271	0.0210809	0.00833814	0.0210809	29.0014	32.7726	30.7779	18.5189	20.8017	14.3043
ENSMUSG00000054499	Dedd2	4.00578e-06	0.000108565	-0.572423	0.124141	6.34968	0.116793	0.00127496	0.0218414	0.0116894	0.0218414	7.82693	7.69632	10.6194	15.9856	15.9567	13.1445
ENSMUSG00000021314	Amph	4.0913e-06	0.000110758	-0.268502	0.0582852	9.14744	0.0220511	0.000137789	0.000391146	0.00495796	0.00495796	109.199	105.576	108.338	136.671	138.719	143.623
ENSMUSG00000060794	Tssk5	4.11662e-06	0.000111319	-1.87015	0.406076	3.12311	1.24711	0.0403317	0.207015	0.15672	0.207015	0.347294	0.140418	0.284568	2.27048	2.11008	0.857254
ENSMUSG00000010453	Kansl3	4.17379e-06	0.000112739	-0.32089	0.0697204	7.64725	0.0321306	0.00112252	0.000426705	0.00616888	0.00616888	42.4629	38.0418	39.2531	54.6939	54.2799	54.0593
ENSMUSG00000028270	Gbp2	4.22063e-06	0.000113877	0.872089	0.189576	5.14637	0.271288	0.0060387	0.0478698	0.0287403	0.0478698	5.97108	9.7887	6.69801	2.39563	3.19836	3.43676
ENSMUSG00000020926	Adam11	4.30152e-06	0.00011593	-0.446937	0.0972393	7.43065	0.0712723	0.000521787	0.0136614	0.00666856	0.0136614	118.108	95.1142	94.2265	146.334	162.307	155.477
ENSMUSG00000035901	Dennd5a	4.33781e-06	0.000116778	-0.274013	0.0596393	8.28644	0.023276	9.61267e-05	0.000842684	0.00523914	0.00523914	159.608	153.424	153.05	197.687	205.862	190.546
ENSMUSG00000043461	Sptssb	4.42263e-06	0.000118929	-0.683356	0.148864	5.77084	0.166685	0.00407783	0.029163	0.0175903	0.029163	9.30716	12.4433	9.09266	16.0376	22.897	20.9567
ENSMUSG00000102504	Gm21955	4.43457e-06	0.000119117	-0.468898	0.102159	7.00435	0.0784833	0.00102466	0.0146299	0.00805295	0.0146299	7.95385	6.99254	7.31636	10.5888	14.1657	10.9982
ENSMUSG00000078722	Gm12394	4.4698e-06	0.00011993	-0.680655	0.148347	5.35034	0.165396	0.0061217	0.0268887	0.0245194	0.0268887	1.94677	1.47917	1.86945	3.59529	4.13073	2.73586
ENSMUSG00000048368	Omd	4.61021e-06	0.000123561	0.624031	0.136198	5.45462	0.137511	0.00525202	0.0206062	0.0225729	0.0225729	9.86796	11.3456	9.70837	5.14247	6.83781	4.59825
ENSMUSG00000022415	Syngr1	4.70794e-06	0.00012604	-0.292184	0.0638318	7.74458	0.0269196	0.000131795	0.00150351	0.00597996	0.00597996	164.769	149.922	154.047	196.432	207.571	188.044
ENSMUSG00000030421	Uri1	4.73471e-06	0.000126617	0.331181	0.0723701	7.42204	0.0367477	0.00116523	0.00363902	0.00669093	0.00669093	60.7954	54.9541	58.8272	40.2132	38.331	44.9609
ENSMUSG00000059003	Grin2a	4.77008e-06	0.000127422	-0.330875	0.0723279	7.12158	0.0366124	0.000236652	0.0044744	0.00761034	0.00761034	8.92615	8.94088	10.2676	13.0269	13.3123	12.8758
ENSMUSG00000073130	Gm1141	4.80895e-06	0.000128318	1.35827	0.297022	3.61666	0.61538	0.0353393	0.0420529	0.0969936	0.0969936	1.47606	2.74123	2.17358	0.501522	0.406682	0.660928
ENSMUSG00000064368	mt-Nd6	4.81637e-06	0.000128375	-0.296641	0.0648731	10.2991	0.0282608	3.88068e-05	0.00228883	0.00627396	0.00627396	4408.26	4172.1	4243.03	4931.1	5239.89	5622.77
ENSMUSG00000039953	Clstn1	5.01919e-06	0.000133633	-0.268567	0.0588449	9.4856	0.0256835	6.95696e-05	0.00498669	0.00512452	0.00512452	231.477	204.168	212.742	276.186	302.993	258.487
ENSMUSG00000071632	2510002D24Rik	5.0465e-06	0.000134213	-0.471936	0.10343	6.68774	0.0796544	0.00541215	0.0106346	0.00953703	0.0106346	34.2665	38.7325	29.99	45.3512	54.194	58.3022
ENSMUSG00000036699	Zcchc12	5.11837e-06	0.000135974	1.79518	0.393689	7.09114	1.15279	0.00130717	0.23118	0.00772025	0.23118	54.9066	67.8563	50.8564	5.86522	7.13287	20.039
ENSMUSG00000027456	Sdcbp2	5.13825e-06	0.000136353	1.07202	0.23514	4.08044	0.37696	0.0191391	0.0211022	0.0637973	0.0637973	2.35506	3.44541	3.98349	1.0258	1.1773	0.997056
ENSMUSG00000038545	Cul7	5.16511e-06	0.000136915	-0.556815	0.122163	7.32217	0.110921	0.00182475	0.0205609	0.00696544	0.0205609	15.8765	12.7551	12.5123	28.3815	20.8135	22.0507
ENSMUSG00000060519	Tor3a	5.19947e-06	0.000137675	0.63247	0.138804	5.62146	0.1273	0.00912602	-8.04113e-06	0.0197737	0.0197737	9.20124	9.34282	9.65784	4.79198	4.28034	5.43474
ENSMUSG00000059713	Rcan3	5.26011e-06	0.000139128	-0.410784	0.0902002	6.32799	0.0556769	0.000351619	0.00596567	0.0118525	0.0118525	36.7243	33.7379	38.6404	53.2911	55.3455	45.1428
ENSMUSG00000023045	Soat2	5.27261e-06	0.000139306	2.3657	0.519518	2.98111	1.98562	0.223368	0.159967	0.18148	0.18148	1.29746	1.36982	1.38964	0.0367161	0.225876	0.179307
ENSMUSG00000004891	Nes	5.29598e-06	0.000139619	0.492986	0.108284	7.07691	0.0869813	0.000864824	0.0167234	0.00777282	0.0167234	7.25893	10.3464	8.70873	5.23064	5.37848	4.77864
ENSMUSG00000013236	Ptprs	5.29033e-06	0.000139619	-0.34683	0.0761772	7.20774	0.0404731	0.00138743	0.00409493	0.00731701	0.00731701	79.0287	93.9005	79.965	115.486	108.942	110.975
ENSMUSG00000005699	Pard6a	5.31092e-06	0.00013986	-0.440894	0.0968547	7.48211	0.0695731	0.0012074	0.0128638	0.00653914	0.0128638	49.1136	48.2833	51.2552	63.8604	75.105	88.7429
ENSMUSG00000025492	Ifitm3	5.32642e-06	0.000140116	0.75445	0.165758	6.08504	0.203729	0.00228654	0.0389272	0.0139362	0.0389272	54.6471	61.8346	59.8372	31.4647	28.5168	18.4403
ENSMUSG00000029201	Ugdh	5.33793e-06	0.000140266	-0.448491	0.0985468	6.59846	0.0670523	0.00452645	0.0038598	0.0100408	0.0100408	17.7197	19.1394	20.5982	26.3174	30.3739	32.2688
ENSMUSG00000113032	Gm47578	5.44437e-06	0.000142845	0.543308	0.11949	5.96852	0.0933005	0.00626757	-0.000335845	0.0151492	0.0151492	3.96565	3.63645	4.34286	2.38057	2.36487	2.17009
ENSMUSG00000019122	Ccl9	5.44791e-06	0.000142845	1.24251	0.273274	4.54092	0.545812	0.0678	0.0355282	0.0442179	0.0442179	3.84665	5.89117	6.65928	1.04233	2.06815	1.60866
ENSMUSG00000059005	Hnrnpa3	5.49083e-06	0.000143815	-0.263648	0.058007	8.88291	0.0239383	0.000110101	0.00374639	0.00493712	0.00493712	281.819	296.663	320.258	358.881	368.002	399.916
ENSMUSG00000097785	B230217O12Rik	5.54581e-06	0.000145097	0.773002	0.170152	4.88754	0.195921	0.00879293	0.0120341	0.0346347	0.0346347	6.02475	5.548	4.49707	2.16483	2.81116	2.276
ENSMUSG00000026576	Atp1b1	5.56343e-06	0.000145401	-0.263048	0.0579104	9.16921	0.0247827	5.81361e-05	0.00497228	0.00496388	0.00497228	1005.13	923.036	891.828	1060.39	1126.84	1242.44
ENSMUSG00000054034	Tceal5	5.6189e-06	0.000146692	-0.571135	0.125794	5.4895	0.109215	0.00178038	0.0124158	0.0219558	0.0219558	58.8118	55.6447	47.5652	97.4448	86.4936	76.4608
ENSMUSG00000113902	Ndufb1-ps	5.69111e-06	0.000148417	-0.347837	0.0766574	7.13378	0.0396405	0.00124733	0.00293186	0.0075672	0.0075672	93.6877	111.521	105.557	131.971	136.268	146.019
ENSMUSG00000030827	Fgf21	5.77831e-06	0.000150529	4.24116	0.935343	2.32979	6.44608	0.0345278	1.27777	0.356833	1.27777	3.07393	3.74217	6.96287	0	0.33755	0
ENSMUSG00000071656	Lrrn4cl	5.81094e-06	0.000151216	0.905449	0.199739	4.50451	0.293826	0.0117184	0.0481253	0.045408	0.0481253	2.12538	2.47946	2.21662	1.0155	1.18693	0.617815
ENSMUSG00000043323	Fbrsl1	5.82042e-06	0.0001513	-0.316479	0.0698196	7.56194	0.0338695	0.000960274	0.00381701	0.0063519	0.0063519	27.2007	24.2521	27.2891	38.1587	33.9881	35.0118
ENSMUSG00000032294	Pkm	5.87239e-06	0.000152487	-0.260902	0.0575824	9.07039	0.020999	3.14305e-05	0.000691095	0.00494217	0.00494217	649.444	622.803	612.428	756.768	802.463	773.689
ENSMUSG00000079033	Mef2b	6.05898e-06	0.000157163	1.86318	0.411814	2.96502	1.14769	0.0698478	0.0629741	0.184539	0.184539	1.05745	1.15085	2.3919	0.191773	0.282509	0.218768
ENSMUSG00000061589	Dot1l	6.06852e-06	0.000157242	-0.288719	0.0638197	8.1582	0.0298952	0.000302051	0.00580737	0.00537089	0.00580737	39.5036	39.1419	35.3354	51.8275	45.2238	54.0355
ENSMUSG00000055943	Emc7	6.09465e-06	0.00015775	0.262327	0.0579974	9.12719	0.024036	9.25116e-05	0.00414673	0.00495303	0.00495303	76.6899	79.1927	86.3955	58.7473	66.0052	61.4123
ENSMUSG00000031865	Dctn1	6.1173e-06	0.000158167	-0.290682	0.0642775	7.85874	0.0266116	0.000415523	0.00116293	0.00578188	0.00578188	147.094	133.666	134.442	174.094	174.218	173.049
ENSMUSG00000033813	Tcea1	6.1458e-06	0.000158734	0.407051	0.0900294	9.013	0.0594335	0.000123298	0.0120346	0.00493562	0.0120346	185.898	196.27	223.367	119.475	131.501	152.41
ENSMUSG00000054072	Iigp1	6.27901e-06	0.000162001	1.34457	0.297685	4.95271	0.648702	0.0100146	0.12291	0.0330826	0.12291	3.63592	6.76792	3.91129	1.104	1.80126	0.844179
ENSMUSG00000037295	Ldlrap1	6.31081e-06	0.000162648	-0.615421	0.136285	5.39765	0.129266	0.00424279	0.0153116	0.0236175	0.0236175	6.448	8.02282	9.11778	15.2724	12.7178	13.9254
ENSMUSG00000045314	Sowahb	6.37313e-06	0.000164071	-0.588508	0.130385	7.35414	0.124303	0.000578701	0.0249217	0.00687443	0.0249217	9.70971	10.537	14.045	19.9188	22.8116	18.0115
ENSMUSG00000023809	Rps6ka2	6.37962e-06	0.000164071	0.432784	0.0958887	6.35528	0.0672243	0.00126177	0.0125302	0.0116478	0.0125302	17.2697	16.9142	20.7871	13.1751	11.39	10.3859
ENSMUSG00000025898	Cwf19l2	6.48033e-06	0.000166484	0.352003	0.078048	6.97039	0.0444815	0.000838292	0.00829894	0.00819129	0.00829894	18.4989	19.3122	22.0532	14.9865	14.4896	12.5966
ENSMUSG00000034063	4930590J08Rik	6.59908e-06	0.000169355	0.688207	0.152724	5.29214	0.153947	0.00931516	0.00550837	0.0256716	0.0256716	5.18979	4.90044	6.34267	2.49128	2.60857	3.03245
ENSMUSG00000027742	Cog6	6.67363e-06	0.000171087	-0.322427	0.0715894	7.34446	0.0359546	0.000785907	0.00517255	0.00690166	0.00690166	37.445	34.4672	32.4872	52.2791	45.6066	44.4167
ENSMUSG00000059316	Slc27a4	6.69502e-06	0.000171453	-0.293072	0.0650814	7.75224	0.0269347	0.000387477	0.0010717	0.0059659	0.0059659	30.189	32.8701	31.7382	41.397	40.7267	43.527
ENSMUSG00000032908	Sgpp2	6.76191e-06	0.000172436	-0.408643	0.0907885	8.31454	0.0599878	0.000247987	0.0121158	0.0052136	0.0121158	31.5977	33.6888	37.3356	52.2709	57.3008	44.645
ENSMUSG00000000753	Serpinf1	6.75685e-06	0.000172436	0.495318	0.110041	6.07359	0.0848107	0.00411527	0.00989584	0.0140483	0.0140483	39.706	39.2136	52.757	25.315	25.0217	25.2603
ENSMUSG00000050910	Cdr2l	6.75351e-06	0.000172436	-0.299451	0.0665253	7.69483	0.0296195	0.000564402	0.00283328	0.00607403	0.00607403	17.776	17.4347	19.4407	25.2778	25.2004	22.5694
ENSMUSG00000063239	Grm4	6.74283e-06	0.000172436	-0.471658	0.104775	9.75624	0.0799117	8.72382e-05	0.0163793	0.00537925	0.0163793	144.13	141.465	183.413	257.685	266.911	219.244
ENSMUSG00000021458	2010111I01Rik	6.82176e-06	0.000173779	-0.42673	0.0948463	6.44341	0.0593801	0.00247157	0.00346652	0.0110222	0.0110222	38.6917	31.9609	33.8451	50.9392	48.257	52.9955
ENSMUSG00000044252	Osbpl1a	6.85395e-06	0.000174415	-0.266487	0.0592434	9.04077	0.0232227	0.00032644	0.00207109	0.00493824	0.00493824	151.367	148.17	155.651	200.255	198.41	177.156
ENSMUSG00000023992	Trem2	6.87895e-06	0.000174867	1.08938	0.242225	5.33594	0.426434	0.00839839	0.079611	0.0248001	0.079611	22.3128	10.9888	12.7312	3.86664	4.8037	5.74624
ENSMUSG00000071528	Usmg5	6.89327e-06	0.000175047	-0.317626	0.0706314	7.95087	0.0362525	0.000332113	0.00715108	0.00563925	0.00715108	1003.42	881.504	897.08	1056.47	1114.25	1281.02
ENSMUSG00000044338	Aplnr	6.93624e-06	0.000175953	0.947202	0.210694	4.90263	0.322428	0.00975323	0.0568346	0.0342703	0.0568346	3.5478	5.34539	4.40939	2.14172	1.18758	1.82688
ENSMUSG00000079614	Seh1l	6.97636e-06	0.000176786	0.293085	0.0652111	7.76055	0.0274525	0.000427962	0.00167557	0.00595077	0.00595077	36.2914	38.1752	40.5448	29.3897	28.3362	28.2305
ENSMUSG00000006731	B4galnt1	7.16777e-06	0.000181446	-0.33241	0.0740559	7.11559	0.0352935	0.000594738	0.00208591	0.00763167	0.00763167	28.1351	27.1792	29.3264	39.9861	39.5733	35.4677
ENSMUSG00000025373	Rnf41	7.29117e-06	0.000184377	-0.307964	0.0686653	7.99904	0.0341105	0.000468261	0.00660413	0.00557054	0.00660413	38.029	39.0048	38.2907	51.8006	58.3461	46.0573
ENSMUSG00000018377	Vezf1	7.3111e-06	0.000184687	0.275018	0.0613274	8.19626	0.0263602	0.000312427	0.00427472	0.00532914	0.00532914	41.3141	43.8047	48.6933	33.5198	34.9227	33.2121
ENSMUSG00000021226	Acot2	7.34287e-06	0.000185296	0.615776	0.137343	5.41169	0.132775	0.00493859	0.0188374	0.0233559	0.0233559	5.59897	5.3022	6.81062	2.83773	2.85511	3.85141
ENSMUSG00000030257	Srgap3	7.42148e-06	0.000187085	-0.268026	0.0598109	8.29951	0.0247996	0.0001389	0.00392136	0.00522711	0.00522711	58.7573	58.4241	65.088	83.234	81.4844	72.7805
ENSMUSG00000002455	Prpf6	7.47721e-06	0.000188293	0.280457	0.0626071	8.08948	0.0255569	0.000427429	0.00202271	0.00545205	0.00545205	54.8025	55.5797	59.9843	42.3682	44.7683	41.0146
ENSMUSG00000031453	Rasa3	7.57917e-06	0.000190662	-0.385032	0.0860071	6.48514	0.0459916	0.000352123	0.00154396	0.0107437	0.0107437	60.0119	56.0644	58.2291	78.0804	84.9465	83.9497
ENSMUSG00000046186	Cd109	7.63205e-06	0.000191793	0.934368	0.208785	4.23775	0.299629	0.00958932	0.0375558	0.0557977	0.0557977	1.43672	1.46213	1.18716	0.553998	0.683501	0.38673
ENSMUSG00000091472	Gm3739	7.66039e-06	0.000192305	0.994236	0.222202	4.30287	0.331641	0.0211162	0.0227453	0.0529446	0.0529446	3.14853	3.27379	2.9965	0.852195	1.52382	1.13081
ENSMUSG00000000386	Mx1	7.68818e-06	0.000192803	2.3659	0.528849	3.22112	1.72876	0.277577	-0.215689	0.141945	0.141945	3.07582	3.53328	3.92542	0.214671	0.435824	0.317669
ENSMUSG00000107451	Gm44421	7.71132e-06	0.000193183	0.759582	0.169813	4.89274	0.20234	0.00874608	0.027817	0.0345086	0.0345086	9.72678	6.5429	6.76132	3.74207	2.82855	3.73539
ENSMUSG00000090841	Myl6	7.85242e-06	0.000196514	-0.259944	0.0581639	8.89491	0.0212325	0.000138527	0.00106297	0.00493604	0.00493604	585.739	582.149	542.227	675.749	679.914	714.926
ENSMUSG00000103144	Pcdhga1	7.86912e-06	0.000196728	0.583449	0.130563	6.09856	0.12258	0.00334512	0.0222249	0.0138059	0.0222249	6.86505	5.39766	5.33481	2.70961	3.82763	3.25568
ENSMUSG00000030235	Slco1c1	7.92801e-06	0.000197995	0.340264	0.0761709	7.903	0.0416963	0.000316369	0.00838663	0.00571149	0.00838663	60.4896	56.9921	53.8216	46.0983	38.0128	37.1559
ENSMUSG00000002020	Ltbp2	8.08067e-06	0.0002016	-0.803857	0.180114	6.65237	0.232785	0.0135205	0.0351413	0.00973158	0.0351413	5.59286	3.21777	4.67726	11.2179	9.06126	9.09495
ENSMUSG00000079415	Cntf	8.15717e-06	0.000203299	0.864544	0.1938	4.71628	0.269301	0.0100168	0.0463207	0.0390344	0.0463207	7.66659	7.8344	9.48811	4.53273	3.50795	2.39308
ENSMUSG00000027810	Eif2a	8.25667e-06	0.000205566	0.300825	0.0674736	7.6729	0.0296444	0.000711898	0.00240759	0.00611712	0.00611712	64.6096	68.635	72.6074	47.3869	51.1133	51.9846
ENSMUSG00000002006	Pdzd4	8.35843e-06	0.000207886	-0.305121	0.0684774	7.98524	0.0335567	0.000364726	0.00666901	0.00558983	0.00666901	26.5559	23.2621	21.4419	30.4357	32.4743	32.5883
ENSMUSG00000021111	Papola	8.62802e-06	0.00021437	0.290028	0.0651899	7.94405	0.0277243	0.000725283	0.00238647	0.0056493	0.0056493	174.292	193.419	193.246	128.953	140.153	136.817
ENSMUSG00000074415	3110039I08Rik	8.73615e-06	0.000216834	0.304997	0.0685956	7.68709	0.0324642	0.000968901	0.00472773	0.00608913	0.00608913	107.091	107.72	102.922	74.4808	65.2516	80.0199
ENSMUSG00000032423	Syncrip	8.76797e-06	0.000217401	0.397959	0.0895192	8.52964	0.0571279	0.000257733	0.0117628	0.00505618	0.0117628	107.758	114.646	135.642	74.0183	77.8083	79.4627
ENSMUSG00000032024	Clmp	8.77698e-06	0.000217401	-0.62674	0.140989	5.12282	0.12866	0.000565606	0.0129587	0.0292514	0.0292514	12.9843	14.6926	13.3519	25.517	26.6842	21.5406
ENSMUSG00000028849	Map7d1	8.81618e-06	0.000218149	-0.273748	0.0615947	9.22525	0.0245855	0.000708743	0.00192139	0.00498211	0.00498211	116.105	111.136	107.703	152.849	136.454	144.751
ENSMUSG00000062661	Ncs1	8.89822e-06	0.000219953	-0.423803	0.0954006	8.01819	0.0648042	0.000395707	0.0132562	0.00554432	0.0132562	42.2979	36.1082	31.869	50.8001	60.023	55.0634
ENSMUSG00000002409	Dyrk1b	8.97368e-06	0.000221592	-0.421764	0.0949805	6.5406	0.0641909	0.00189798	0.011634	0.0103903	0.011634	8.13284	7.07954	7.98619	12.805	12.8585	9.87187
ENSMUSG00000032440	Tgfbr2	9.00934e-06	0.000222246	0.42937	0.096712	6.90041	0.0665315	0.00140132	0.0126285	0.0084917	0.0126285	8.36851	8.20863	8.23645	6.07944	5.75153	4.45187
ENSMUSG00000041653	Pnpla3	9.05126e-06	0.000223052	-0.426038	0.0959831	6.84721	0.0557307	0.00508469	-0.00348699	0.00873443	0.00873443	46.4854	48.8329	44.5724	69.9576	66.8799	70.9022
ENSMUSG00000113852	Gm48062	9.15836e-06	0.000225462	-0.315372	0.0710913	7.33191	0.0349519	0.000643581	0.00574911	0.00693739	0.00693739	26.5049	21.6652	22.4013	33.7646	30.2227	31.7709
ENSMUSG00000056158	Car10	9.18852e-06	0.000225974	-0.318122	0.0717227	8.64169	0.0365334	0.000590065	0.00712616	0.00500002	0.00712616	74.3338	76.7286	86.8517	110.788	116.607	97.7335
ENSMUSG00000097415	AU020206	9.20279e-06	0.000226095	0.816104	0.18401	4.56084	0.200871	0.00720431	-0.00587475	0.0435853	0.0435853	3.62377	3.52783	3.82314	1.59864	1.61172	1.57275
ENSMUSG00000000216	Scnn1g	9.26083e-06	0.00022729	-0.826282	0.186362	4.67234	0.223833	0.0118382	0.011925	0.040258	0.040258	1.1039	1.01745	0.78467	2.29478	2.41562	1.90108
ENSMUSG00000041552	Ptchd1	9.41254e-06	0.000230779	-0.415895	0.0938763	6.34472	0.0599863	0.00149279	0.00862674	0.0117264	0.0117264	12.7639	13.5985	13.1942	18.8877	22.6626	17.4396
ENSMUSG00000040659	Efhd2	9.49293e-06	0.000232514	-0.281049	0.0634649	7.91142	0.0249767	0.0003432	0.00125704	0.0056985	0.0056985	37.5973	39.033	34.8904	49.324	48.2913	47.9693
ENSMUSG00000033066	Gas7	9.50737e-06	0.000232632	-0.64118	0.144798	8.75055	0.148493	8.78871e-05	0.031362	0.00496192	0.031362	147.774	131.977	182.808	282.026	341.783	237.218
ENSMUSG00000092083	Kcnb2	9.63093e-06	0.000235374	0.822885	0.18595	6.71587	0.244635	0.001226	0.0506403	0.00938681	0.0506403	5.00406	5.74773	7.53702	2.02958	2.87988	3.20202
ENSMUSG00000047379	B4gat1	9.63891e-06	0.000235374	-0.276067	0.0623863	8.01314	0.0247293	0.000286908	0.00204485	0.00555118	0.00555118	56.3517	55.9187	49.8497	69.8328	71.561	71.2186
ENSMUSG00000026427	Eif2d	9.66008e-06	0.000235653	-0.320323	0.0723951	7.43266	0.0348547	0.00119819	0.00389268	0.00666339	0.00666339	24.8569	24.7149	23.7756	30.3969	32.7131	36.6914
ENSMUSG00000073489	Ifi204	9.74706e-06	0.000237535	1.0177	0.230107	4.18302	0.348082	0.0210348	0.0256771	0.0583891	0.0583891	2.62129	2.81388	3.52514	1.19599	1.25857	0.780143
ENSMUSG00000102252	Snrpn	9.9021e-06	0.000241071	-0.281069	0.0636004	10.1818	0.0268412	3.58903e-05	0.00389067	0.00603163	0.00603163	579.309	507.25	501.501	660.64	699.524	715.835
ENSMUSG00000029919	Hpgds	1.00066e-05	0.000243371	0.752651	0.170398	5.76638	0.199324	0.0259018	0.0108211	0.0176512	0.0176512	6.83683	7.70867	5.0545	3.19073	2.49407	3.5236
ENSMUSG00000001525	Tubb5	1.04331e-05	0.000253487	-0.280479	0.0636295	7.75354	0.0281794	0.000109554	0.00561409	0.00596352	0.00596352	122.864	139.657	111.913	156.763	158.594	160.278
ENSMUSG00000028702	Rad54l	1.04828e-05	0.000254256	0.699253	0.15867	4.95073	0.149529	0.00463505	-0.00108178	0.0331291	0.0331291	4.27227	3.80095	4.28253	1.94684	2.10063	1.97776
ENSMUSG00000024965	Fermt3	1.04858e-05	0.000254256	0.839181	0.190424	5.03811	0.254781	0.00542776	0.0489642	0.0311252	0.0489642	3.68971	2.77998	3.47675	1.17531	1.19358	1.9734
ENSMUSG00000106927	Gm43598	1.05332e-05	0.000255152	1.19941	0.272226	3.71409	0.512245	0.0225029	0.078337	0.0886573	0.0886573	1.41229	1.2466	1.22924	0.370792	0.606593	0.24503
ENSMUSG00000019301	Hsd17b1	1.06754e-05	0.000258337	1.86098	0.422659	4.19071	1.25334	0.0292498	0.238711	0.0580139	0.238711	5.27986	5.45037	6.42536	0.679884	0.468124	1.95935
ENSMUSG00000040136	Abcc8	1.07149e-05	0.000259033	-0.503659	0.11441	6.4266	0.0918094	0.00451442	0.0151201	0.0111375	0.0151201	19.4642	15.3478	17.7031	27.6707	24.9909	33.9679
ENSMUSG00000005716	Pvalb	1.07266e-05	0.000259056	-0.266276	0.06049	9.81004	0.0249433	4.47223e-05	0.00454578	0.00544384	0.00544384	943.607	790.613	812.479	1064.27	1081.2	1030.41
ENSMUSG00000055633	Zfp580	1.07821e-05	0.000259877	-0.568176	0.129106	5.54004	0.0992667	0.00391096	-0.000886702	0.0210914	0.0210914	10.7649	10.3186	9.47468	17.5931	17.0772	16.3538
ENSMUSG00000048385	Scrt1	1.07727e-05	0.000259877	-0.380127	0.0863719	8.42388	0.0523012	0.000257199	0.010933	0.00512528	0.010933	36.0106	28.4019	35.2728	48.0502	50.7822	45.3321
ENSMUSG00000110275	Gm5905	1.07941e-05	0.000259907	1.77217	0.402708	3.07903	0.958439	0.0792953	-0.0589644	0.163966	0.163966	5.06118	6.77707	6.74095	0.810432	0.957194	0.981864
ENSMUSG00000038967	Pdk2	1.11846e-05	0.000269043	-0.321447	0.073174	7.05532	0.0368452	0.00017761	0.0071309	0.00785405	0.00785405	96.574	77.5724	86.0135	117.025	119.625	102.415
ENSMUSG00000007872	Id3	1.12682e-05	0.000270784	0.418484	0.0952987	6.23405	0.0570421	0.00102311	0.00460622	0.0125997	0.0125997	48.873	44.9201	47.5628	27.6498	27.9758	32.3868
ENSMUSG00000036478	Btg1	1.13126e-05	0.000271582	-0.40201	0.091565	8.64489	0.0585445	0.000934917	0.0116413	0.00499868	0.0116413	82.5269	68.5894	86.2534	107.299	129.071	116.3
ENSMUSG00000046330	Rpl37a	1.14627e-05	0.000274911	-0.297489	0.0678028	7.53277	0.0276367	0.000477359	0.00088116	0.00641846	0.00641846	300.219	266.967	281.063	365.434	365.403	349.618
ENSMUSG00000107108	Gm9936	1.15967e-05	0.00027785	1.3004	0.296555	3.97247	0.612848	0.0205214	0.111396	0.0702225	0.111396	1.2219	1.11818	2.02907	0.552432	0.391429	0.247245
ENSMUSG00000055197	Fev	1.17515e-05	0.00028128	3.8395	0.876169	1.2266	4.52554	0.0776682	0.0510924	1.07384	1.07384	0.769326	1.95699	1.82917	0	0	0
ENSMUSG00000043587	Pxylp1	1.18469e-05	0.000283284	-0.51799	0.118252	5.69624	0.0972742	0.00124339	0.0197319	0.0186431	0.0197319	21.0259	17.4003	19.6457	32.757	34.4598	27.775
ENSMUSG00000038473	Nos1ap	1.19377e-05	0.000285172	-0.341436	0.0779761	7.20461	0.0420727	0.00179319	0.00708077	0.00732722	0.00732722	32.5393	29.4161	30.8854	42.4068	48.3674	37.0073
ENSMUSG00000026153	Fam135a	1.20127e-05	0.00028668	0.280831	0.0641553	8.03718	0.0258137	0.000654933	0.00203754	0.00551892	0.00551892	64.4915	59.5535	63.5819	44.8095	46.8821	50.7804
ENSMUSG00000036957	Lrfn3	1.20272e-05	0.000286743	-0.37457	0.085575	6.63911	0.049217	0.00117844	0.00772938	0.00980618	0.00980618	7.24607	7.99924	7.98733	12.4509	11.5622	9.82077
ENSMUSG00000032087	Dscaml1	1.21216e-05	0.000288709	-0.550725	0.125869	5.55959	0.0998143	0.00299781	0.00803308	0.0207667	0.0207667	7.62201	6.82162	6.84344	13.2432	11.4368	12.8568
ENSMUSG00000046027	Stard5	1.22734e-05	0.000291909	0.584817	0.133744	6.4548	0.124068	0.00188642	0.0249446	0.0109451	0.0249446	44.4092	47.2273	54.4295	33.2971	25.5196	21.8611
ENSMUSG00000036298	Slc2a13	1.22801e-05	0.000291909	-0.500228	0.114402	6.93239	0.0907737	0.000659332	0.0189723	0.00835178	0.0189723	16.3242	18.7571	20.3574	29.7771	26.1503	32.1164
ENSMUSG00000040435	Ppp1r15a	1.23461e-05	0.000292945	0.55419	0.126777	7.37681	0.111425	0.000674455	0.023434	0.00681171	0.023434	36.774	27.4599	35.2542	19.3762	21.3103	15.5282
ENSMUSG00000031633	Slc25a4	1.23479e-05	0.000292945	-0.26373	0.0603315	9.78595	0.0239	4.55112e-05	0.00374688	0.00541432	0.00541432	480.615	442.338	415.277	543.56	580.014	595.658
ENSMUSG00000042289	Hsd3b7	1.24277e-05	0.000294548	-0.528012	0.120828	5.67298	0.0868262	0.00291236	0.0010718	0.0189867	0.0189867	15.8954	13.5723	13.6845	22.9525	21.5817	24.2563
ENSMUSG00000038299	Wdr36	1.25081e-05	0.000296163	0.309859	0.0709298	7.37617	0.0341446	0.000733083	0.0059429	0.00681346	0.00681346	30.6188	33.3004	34.9338	23.2773	23.4669	21.8751
ENSMUSG00000072487	Mroh5	1.26179e-05	0.000298471	-1.46305	0.335053	3.76909	0.776868	0.0426214	0.125769	0.0843179	0.125769	0.251579	0.304523	0.474233	1.91313	1.91535	0.820463
ENSMUSG00000069793	Slfn9	1.26492e-05	0.00029892	0.791709	0.181331	4.87799	0.227498	0.00694693	0.0423747	0.0348669	0.0423747	1.80372	2.38892	2.59064	0.73927	1.06417	1.10695
ENSMUSG00000031760	Mt3	1.27344e-05	0.000300638	-0.297204	0.0680939	7.48137	0.0276697	0.000414219	0.00104909	0.00654095	0.00654095	314.987	302.888	285.68	374.788	362.748	368.615
ENSMUSG00000029047	Pex10	1.27633e-05	0.000301027	-0.695645	0.159401	4.92879	0.166917	0.00446711	0.0227078	0.0336458	0.0336458	7.60198	12.888	8.57469	14.1963	17.232	18.4612
ENSMUSG00000020806	Rhbdf2	1.27778e-05	0.000301076	-0.52132	0.119463	5.84311	0.093421	0.00476687	0.0100941	0.0166401	0.0166401	2.99659	2.8691	3.39478	4.66394	4.78149	6.08652
ENSMUSG00000106847	Peg13	1.2822e-05	0.000301822	-0.25737	0.0589875	9.49997	0.0211942	8.40657e-05	0.001569	0.00513523	0.00513523	96.5565	90.8986	98.1149	121.922	127.18	119.542
ENSMUSG00000026285	Pdcd1	1.30206e-05	0.000306199	3.53728	0.811347	1.44146	3.9428	0.115947	0.120419	0.87148	0.87148	0.626594	0.481991	0.363317	0	0.0193573	0
ENSMUSG00000026712	Mrc1	1.30585e-05	0.000306792	0.540067	0.123894	5.61727	0.102668	0.0031851	0.0157731	0.0198393	0.0198393	4.89782	5.24886	3.90944	2.21166	2.74367	3.10035
ENSMUSG00000026355	Mcm6	1.3115e-05	0.000307821	0.709925	0.162895	5.34533	0.18304	0.00454477	0.0352574	0.0246166	0.0352574	6.80898	8.84109	8.67114	4.4382	4.54166	2.93522
ENSMUSG00000074771	Ankef1	1.33382e-05	0.000312451	1.16021	0.26644	5.03988	0.489015	0.0743368	0.032149	0.0310855	0.032149	5.62199	7.20881	6.95032	1.20272	1.99387	3.42416
ENSMUSG00000049299	Trappc1	1.33359e-05	0.000312451	-0.386143	0.0886765	6.52773	0.0474551	0.00132461	0.00207922	0.0104707	0.0104707	66.811	64.5008	59.1413	85.0633	82.217	87.6933
ENSMUSG00000026639	Lamb3	1.34445e-05	0.000314638	0.982634	0.225751	5.29723	0.303633	0.0508762	-0.033423	0.0255688	0.0255688	16.1009	16.7158	19.4239	5.61994	5.80291	7.51499
ENSMUSG00000053769	Lysmd1	1.36591e-05	0.000319043	-0.309136	0.0710778	7.33749	0.029533	0.000656626	0.000422683	0.00692145	0.00692145	20.6373	21.1539	21.2089	26.9902	28.6063	28.5142
ENSMUSG00000034330	Plcg2	1.36541e-05	0.000319043	0.776626	0.178561	4.69793	0.200403	0.00828622	0.0160378	0.03954	0.03954	1.55723	1.36935	1.2901	0.689697	0.507975	0.74158
ENSMUSG00000022111	Uchl3	1.37455e-05	0.000320749	0.348215	0.0800883	6.89972	0.0396989	0.00112644	0.00302703	0.00849477	0.00849477	81.6908	73.7667	80.2377	50.2204	58.3115	52.5291
ENSMUSG00000021709	Erbin	1.39225e-05	0.000324566	0.286819	0.0660102	8.50572	0.0299084	0.00019796	0.00633805	0.00507043	0.00633805	57.509	47.6279	46.3753	37.07	38.1041	38.5711
ENSMUSG00000093909	Gm3883	1.39589e-05	0.000324873	-0.522753	0.120325	5.98283	0.0993549	0.00641448	0.0153027	0.0149914	0.0153027	3.77421	3.43251	4.03327	5.16832	6.28897	7.55162
ENSMUSG00000038011	Dnah10	1.39625e-05	0.000324873	0.935924	0.21543	4.51323	0.318478	0.0131213	0.0564937	0.0451189	0.0564937	1.68254	1.79191	1.26666	0.720803	0.737351	0.411253
ENSMUSG00000028456	Unc13b	1.40986e-05	0.000327409	0.632042	0.145554	6.92272	0.145266	0.00340052	0.0283784	0.00839361	0.0283784	24.5746	22.4167	22.9578	12.7789	15.6629	9.75542
ENSMUSG00000047547	Cltb	1.40894e-05	0.000327409	-0.254595	0.0586291	8.86682	0.0199431	0.000217169	0.000404745	0.00493888	0.00493888	162.516	163.419	171.685	206.32	209.591	210.814
ENSMUSG00000042116	Vwa1	1.41201e-05	0.000327595	0.353928	0.0815131	7.36031	0.0455529	0.000532373	0.0094342	0.00685721	0.0094342	18.0544	18.901	19.237	11.6866	12.4257	15.2934
ENSMUSG00000014786	Slc9a5	1.42813e-05	0.000331016	-0.430379	0.0991774	7.44683	0.0673713	0.000564859	0.0141894	0.00662711	0.0141894	14.9448	12.9066	10.7542	19.852	20.0168	18.3805
ENSMUSG00000013646	Sh3bp5l	1.43882e-05	0.000333175	-0.274951	0.0633842	7.98464	0.0242183	0.000435668	0.00148784	0.00559067	0.00559067	31.6712	30.9245	29.0101	39.427	41.5449	38.1385
ENSMUSG00000038451	Spsb2	1.45091e-05	0.000335653	-0.616495	0.14218	5.30966	0.126406	0.0050031	0.0104799	0.0253197	0.0253197	4.41803	5.72212	4.91752	9.51682	9.74249	7.61549
ENSMUSG00000063160	Numbl	1.45661e-05	0.000336329	-0.432861	0.0998491	7.90571	0.0681744	0.00180988	0.0131449	0.00570729	0.0131449	31.6475	23.3296	28.4685	44.8135	40.446	41.1264
ENSMUSG00000006958	Chrd	1.45528e-05	0.000336329	-0.770723	0.177776	7.01635	0.21613	0.00311232	0.0442944	0.0080052	0.0442944	11.4523	7.89537	6.78302	16.4864	17.2384	21.4011
ENSMUSG00000049422	Chchd10	1.46824e-05	0.000338689	-0.394521	0.0910418	8.33668	0.0566403	0.00112678	0.0113061	0.00519431	0.0113061	162.687	206.888	164.841	256.438	231.6	270.41
ENSMUSG00000000740	Rpl13	1.48063e-05	0.000341223	-0.350332	0.080879	8.08996	0.0446693	0.000925001	0.00888712	0.00545146	0.00888712	199.233	215.434	206.611	256.845	329.604	256.897
ENSMUSG00000022613	Miox	1.48791e-05	0.000342572	3.47686	0.802884	1.48287	3.97314	0.130101	0.303111	0.836832	0.836832	1.03404	2.16787	1.98356	0	0.0819891	0
ENSMUSG00000055489	Ano5	1.49703e-05	0.000344345	0.985583	0.227663	4.74648	0.353609	0.00734378	0.070402	0.0382185	0.070402	2.48978	1.87816	3.66722	0.856391	1.18704	0.75535
ENSMUSG00000110419	AW046200	1.58032e-05	0.000363159	-0.872774	0.202163	4.44814	0.251788	0.0139612	0.0151236	0.0473435	0.0473435	2.0308	2.08914	2.25596	6.58051	4.11784	4.80699
ENSMUSG00000027950	Chrnb2	1.59312e-05	0.000365751	-0.251726	0.0583321	8.7786	0.020855	0.000149247	0.00215714	0.0049547	0.0049547	32.3173	33.6744	34.2399	40.6181	42.5833	45.6489
ENSMUSG00000023572	Ccndbp1	1.59698e-05	0.000366289	-0.300369	0.0696127	7.596	0.0328817	0.00044558	0.0068233	0.0062768	0.0068233	96.8131	77.0345	82.2675	115.217	113.801	103.544
ENSMUSG00000056296	Synpr	1.62368e-05	0.000372062	-0.482896	0.112009	8.52544	0.0850118	0.000441303	0.0183779	0.00505863	0.0183779	85.1149	80.5968	82.062	107.788	146.671	152.514
ENSMUSG00000035765	Dym	1.63195e-05	0.000373603	-0.281739	0.0653675	7.70697	0.0267322	0.000358746	0.0032901	0.00605063	0.00605063	33.6146	34.483	34.5558	45.3403	48.6568	41.2757
ENSMUSG00000005802	Slc30a4	1.64095e-05	0.000375306	0.327941	0.0761085	8.3274	0.0392146	0.000211719	0.00847703	0.00520231	0.00847703	52.6516	53.2253	62.714	37.5258	43.2485	41.1464
ENSMUSG00000048281	Dleu7	1.65367e-05	0.000377859	1.32697	0.308085	4.12098	0.642156	0.0212673	0.121107	0.0615679	0.121107	2.91541	5.77965	4.67272	0.91349	0.836876	1.79001
ENSMUSG00000041559	Fmod	1.65708e-05	0.000378212	0.866972	0.201308	6.53211	0.274122	0.00095071	0.0598365	0.0104433	0.0598365	26.2508	22.5223	21.9286	10.8214	12.7646	6.69911
ENSMUSG00000027995	Tlr2	1.65835e-05	0.000378212	0.934932	0.217096	4.58245	0.318787	0.0145767	0.0561195	0.042913	0.0561195	1.96105	2.50821	2.32749	1.28608	0.630458	0.820756
ENSMUSG00000047617	Paxx	1.66559e-05	0.000379233	-0.31848	0.0739694	7.16612	0.0321093	0.000751741	0.00134885	0.00745546	0.00745546	82.4994	74.9393	75.8609	101.966	98.9054	104.052
ENSMUSG00000044258	Ctla2a	1.66596e-05	0.000379233	0.613031	0.142383	5.52325	0.13707	0.00368419	0.0267251	0.0213746	0.0267251	30.344	37.1011	31.2806	21.8119	14.1616	15.3576
ENSMUSG00000018481	Appbp2	1.67818e-05	0.000381437	0.283535	0.0658786	9.00745	0.0293256	0.000120511	0.00638948	0.00493522	0.00638948	63.908	64.421	72.3366	51.2337	54.3937	46.3305
ENSMUSG00000049047	Armcx3	1.6788e-05	0.000381437	-0.256138	0.0595142	8.50973	0.02086	0.000244925	0.00122748	0.00506799	0.00506799	60.2443	64.5262	61.4791	77.3167	82.8896	80.1063
ENSMUSG00000059923	Grb2	1.69633e-05	0.00038506	-0.278222	0.06468	8.81515	0.027664	0.00132838	0.00422381	0.00494688	0.00494688	94.513	104.285	111.713	135.765	144.425	130.509
ENSMUSG00000075012	Fjx1	1.70258e-05	0.000386114	-0.314916	0.0732243	7.18838	0.0361101	0.000662032	0.00728606	0.00738067	0.00738067	12.6073	13.7451	13.8321	15.8981	19.452	19.6787
ENSMUSG00000003134	Tbc1d8	1.71075e-05	0.000387605	-0.333999	0.0776807	7.04092	0.0341178	0.00114224	-0.000328256	0.00790919	0.00790919	10.8024	11.0277	11.209	14.4488	15.8864	14.7128
ENSMUSG00000024620	Pdgfrb	1.71367e-05	0.000387902	0.312269	0.0726332	7.23915	0.0354258	0.000697036	0.00701821	0.00721634	0.00721634	10.6906	9.7803	11.0988	7.52196	8.56288	7.01814
ENSMUSG00000028672	Hmgcl	1.73046e-05	0.000391337	-0.340223	0.079175	6.89152	0.0415833	0.0008716	0.00770072	0.00853141	0.00853141	46.2539	48.1906	40.6527	65.2644	62.5491	55.4185
ENSMUSG00000004633	Chn2	1.73268e-05	0.000391473	-0.383121	0.089164	8.77846	0.0535749	5.05447e-05	0.0118748	0.00495473	0.0118748	373.256	368.469	454.46	530.836	614.54	519.322
ENSMUSG00000027247	Arhgap1	1.78551e-05	0.000403033	0.342866	0.0799193	7.3577	0.0376578	0.00271616	0.000272142	0.00686449	0.00686449	50.5661	49.5869	50.2208	33.7468	37.8257	32.3513
ENSMUSG00000034566	Atp5h	1.832e-05	0.000413141	-0.251647	0.0587351	8.69483	0.0203913	0.000195304	0.00154649	0.00497942	0.00497942	783.51	784.338	716.007	872.721	916.029	906.847
ENSMUSG00000097461	Gm26735	1.84287e-05	0.000415203	0.656656	0.153312	5.59166	0.136712	0.0150116	-0.00582063	0.0202454	0.0202454	7.46128	6.66467	6.18955	3.33302	3.26886	3.8861
ENSMUSG00000026028	Trak2	1.84607e-05	0.000415538	-0.311603	0.0727578	7.09873	0.0349762	0.000248014	0.00706122	0.00769253	0.00769253	60.9554	68.0159	69.7772	96.3214	85.6575	79.4927
ENSMUSG00000050967	Creg2	1.86955e-05	0.000420431	0.736396	0.172058	6.13163	0.198208	0.002005	0.0424009	0.0134958	0.0424009	4.77912	5.44819	3.58495	1.75112	2.1965	2.67907
ENSMUSG00000040712	Camta2	1.88002e-05	0.000422107	-0.284186	0.066419	9.09783	0.0295222	0.000490932	0.00612629	0.00494687	0.00612629	58.3683	59.2042	59.8591	80.2716	86.5243	68.2799
ENSMUSG00000022419	Deptor	1.88049e-05	0.000422107	0.464584	0.108582	5.8244	0.0714629	0.00080566	0.00758377	0.0168796	0.0168796	8.03024	8.03121	8.87066	5.22969	5.66093	4.61216
ENSMUSG00000040390	Map3k10	1.88782e-05	0.000423358	-0.287031	0.0670983	7.69437	0.0290682	0.000678358	0.00476189	0.00607492	0.00607492	45.4191	44.0818	44.975	52.4662	64.7389	58.2308
ENSMUSG00000010154	Spire2	1.90524e-05	0.000426868	0.365612	0.0855089	6.65747	0.0431838	0.0012645	0.00258824	0.00970317	0.00970317	15.4017	14.4159	15.326	9.4017	10.612	10.8013
ENSMUSG00000036587	Fut7	1.92463e-05	0.000430664	1.80115	0.421473	3.05799	1.15736	0.0988922	0.131261	0.167567	0.167567	1.11909	0.937517	1.04645	0.113071	0.0969684	0.355413
ENSMUSG00000037960	Card19	1.92574e-05	0.000430664	0.512031	0.11982	5.85133	0.0958811	0.00370728	0.017828	0.0165363	0.017828	38.0114	36.3075	33.6633	16.3727	19.8803	24.0527
ENSMUSG00000003863	Ppfia3	1.94331e-05	0.000433791	-0.260925	0.0610879	8.25542	0.0208727	0.000328879	0.000231294	0.00526871	0.00526871	27.3685	27.3449	26.2994	34.1686	34.8809	35.0868
ENSMUSG00000007891	Ctsd	1.94182e-05	0.000433791	0.346761	0.0811806	9.55747	0.0439813	6.6746e-05	0.00981868	0.00518115	0.00981868	398.64	318.62	343.978	255.119	257.119	225.195
ENSMUSG00000023249	Parp3	1.94864e-05	0.00043458	0.601092	0.140748	5.50289	0.128382	0.00799166	0.0169937	0.0217233	0.0217233	14.638	15.0684	11.0802	6.90928	7.97277	6.5379
ENSMUSG00000017485	Top2b	1.95777e-05	0.000436214	-0.349928	0.081957	6.93922	0.0447952	0.0012967	0.00877872	0.00832248	0.00877872	89.6633	94.9754	92.2293	124.462	117.884	143.515
ENSMUSG00000035325	Sec31a	1.99171e-05	0.000443367	0.317058	0.0743252	7.20696	0.0323806	0.000966802	0.00181184	0.00731956	0.00731956	65.5949	60.071	67.5353	47.5094	46.3879	45.3478
ENSMUSG00000045573	Penk	2.0364e-05	0.000452897	-0.40235	0.0944292	8.15257	0.0592659	0.000398179	0.0129771	0.00537726	0.0129771	143.908	129.26	114.512	162.85	204.109	195.134
ENSMUSG00000031953	Tmem170	2.05251e-05	0.000455642	-0.41618	0.0977156	6.26995	0.0586219	0.00201643	0.00630868	0.0123061	0.0123061	4.90858	5.363	5.0658	8.10596	6.6746	8.44413
ENSMUSG00000046434	Hnrnpa1	2.05153e-05	0.000455642	-0.252711	0.0593329	8.90345	0.0201494	0.000345214	0.000892866	0.00493538	0.00493538	187.609	196.132	176.95	242.359	237.311	232.476
ENSMUSG00000047261	Gap43	2.05513e-05	0.000455805	-0.714784	0.167836	8.16825	0.187078	0.000437656	0.0418159	0.00535965	0.0418159	122.207	126.471	84.2225	190.383	199.424	257.812
ENSMUSG00000030120	Mlf2	2.06871e-05	0.000458342	-0.254494	0.0597776	8.34012	0.0229706	0.000168664	0.00425701	0.00519137	0.00519137	254.768	240.093	242.279	315.54	315.474	293.626
ENSMUSG00000022551	Cyc1	2.07036e-05	0.000458342	-0.313552	0.0736528	8.0959	0.0360042	0.000767384	0.00736973	0.00544416	0.00736973	228.425	226.864	204.407	251.729	281.672	296.749
ENSMUSG00000042115	Klhdc8a	2.11855e-05	0.000468581	-0.513669	0.120806	6.88624	0.0966698	0.00100163	0.0208895	0.00855515	0.0208895	7.1264	6.77956	5.23507	9.13524	10.8861	11.674
ENSMUSG00000049721	Gal3st1	2.13459e-05	0.000471669	-0.410629	0.0966111	6.33294	0.0613191	0.00218562	0.0112323	0.0118149	0.0118149	10.588	12.0167	10.1954	15.1198	14.72	19.1334
ENSMUSG00000000982	Ccl3	2.13641e-05	0.000471669	1.82686	0.429837	2.8788	1.1158	0.075292	0.0679203	0.201848	0.201848	4.75956	4.49511	2.21297	0.454744	0.398196	0.781338
ENSMUSG00000033256	Shf	2.14551e-05	0.000473245	-0.254308	0.0598487	8.65122	0.0207052	0.000376756	0.00125249	0.00499605	0.00499605	190.049	174.511	181.46	226.687	227.196	225.28
ENSMUSG00000021676	Iqgap2	2.15804e-05	0.000475575	0.476482	0.112169	5.95995	0.083209	0.00255312	0.0163199	0.0152448	0.0163199	3.84	3.95209	3.15912	2.3625	2.55959	1.89981
ENSMUSG00000108456	4732496C06Rik	2.17773e-05	0.000479478	0.858098	0.202103	4.58601	0.269915	0.00994693	0.0513216	0.0428036	0.0513216	3.20692	3.86279	2.54669	1.85277	1.15768	1.08408
ENSMUSG00000030352	Tspan9	2.19936e-05	0.0004838	-0.680845	0.160439	7.6083	0.169954	0.000293911	0.0383173	0.00625033	0.0383173	133.482	120.668	165.637	274.544	290.19	199.534
ENSMUSG00000033854	Kcnk10	2.23762e-05	0.000491768	-0.514816	0.121426	6.62326	0.0972037	0.000988628	0.0211277	0.0098966	0.0211277	11.413	11.8563	16.4373	20.3456	22.0608	22.2402
ENSMUSG00000033207	Mamdc2	2.26188e-05	0.000496649	0.561446	0.1325	6.10033	0.115634	0.00208884	0.0242455	0.013789	0.0242455	7.70618	6.74767	8.56741	4.42244	5.19074	3.54542
ENSMUSG00000106383	E330034L11Rik	2.27078e-05	0.000498149	0.404597	0.0955037	6.3359	0.051744	0.0018888	0.0014041	0.0117926	0.0117926	19.5082	18.3535	18.8039	12.9891	11.3969	13.1808
ENSMUSG00000028889	Yrdc	2.27602e-05	0.000498846	0.451083	0.10649	6.52764	0.0746509	0.00304224	0.0139678	0.0104713	0.0139678	72.602	57.6686	58.4195	39.9942	40.3761	30.6332
ENSMUSG00000040490	Lrfn2	2.28409e-05	0.000500162	0.950301	0.224385	4.5737	0.33134	0.0115315	0.0639912	0.0431835	0.0639912	1.88514	2.02755	1.31194	0.456729	0.741583	0.825364
ENSMUSG00000037351	Actr1b	2.31016e-05	0.000505413	-0.304701	0.0719894	7.23649	0.0313245	0.000548958	0.00379061	0.00722475	0.00722475	117.879	105.626	117.407	154.328	139.089	142.254
ENSMUSG00000026147	Col9a1	2.31819e-05	0.000506711	-0.768774	0.181666	4.64833	0.195305	0.0085574	0.0139434	0.0409462	0.0409462	1.52935	1.37582	1.19112	2.96818	2.41599	3.38464
ENSMUSG00000003226	Ranbp2	2.32856e-05	0.000508519	0.308966	0.0730277	8.04591	0.0350376	7.96732e-05	0.0079199	0.00550745	0.0079199	70.944	77.2024	85.5569	57.1029	61.58	53.6131
ENSMUSG00000101166	Gm28496	2.34134e-05	0.000510847	1.40227	0.331539	3.38771	0.63504	0.044383	0.0120346	0.120494	0.120494	0.670882	1.10507	0.982714	0.206563	0.269959	0.175397
ENSMUSG00000070730	Rmdn3	2.3786e-05	0.000518508	-0.32935	0.0779339	6.83493	0.0358731	0.000318371	0.00384617	0.00879217	0.00879217	130.804	142.211	148.677	144.548	159.071	142.337
ENSMUSG00000018930	Ccl4	2.3917e-05	0.000520425	3.06267	0.72493	1.71935	3.09037	0.125863	0.219606	0.662423	0.662423	2.89591	2.87217	2.13754	0	0.192861	0.0850762
ENSMUSG00000022477	Aco2	2.3904e-05	0.000520425	-0.255167	0.0603958	8.14908	0.0200336	9.02462e-05	0.000535479	0.00538124	0.00538124	300.59	283.071	291.092	341.462	361.784	347.728
ENSMUSG00000092375	A730060N03Rik	2.41561e-05	0.000525157	-0.564382	0.133659	5.52536	0.116996	0.00480156	0.0219956	0.0213388	0.0219956	3.52183	3.51139	3.47717	6.25949	7.51748	4.6918
ENSMUSG00000031480	Thsd1	2.47054e-05	0.000536616	0.537426	0.127428	5.54762	0.0990219	0.00339211	0.0120752	0.0209649	0.0209649	4.44855	3.79012	3.45992	2.58978	2.08191	2.13287
ENSMUSG00000027751	Supt20	2.47408e-05	0.000536902	0.290859	0.0689705	7.70458	0.0276812	0.00108021	0.00179668	0.00605519	0.00605519	63.8857	63.8619	72.2879	48.7754	49.3008	49.145
ENSMUSG00000031166	Wdr13	2.48044e-05	0.000537799	-0.274581	0.0651195	7.82509	0.0254511	0.000523085	0.00301772	0.00583775	0.00583775	66.6876	67.988	69.1876	104.55	84.9887	90.0978
ENSMUSG00000083282	Ctsf	2.49396e-05	0.000540246	-0.256565	0.0608644	8.21608	0.0233943	0.000248414	0.00430997	0.00530831	0.00530831	71.9095	60.4252	64.2589	85.0093	83.8119	82.1262
ENSMUSG00000048827	Pkd1l3	2.51298e-05	0.000543879	0.506635	0.120237	5.88726	0.0899396	0.00559283	0.010577	0.0160926	0.0160926	4.29487	4.65508	3.5023	2.63141	2.66439	2.28491
ENSMUSG00000026245	Farsb	2.51779e-05	0.000543946	0.338992	0.0804595	7.05667	0.0422431	0.000667345	0.00904324	0.00784889	0.00904324	82.5315	92.8851	96.8496	58.2078	71.2744	60.2773
ENSMUSG00000073532	Gm7276	2.51702e-05	0.000543946	-0.842713	0.200014	4.45618	0.230936	0.0129482	0.00940915	0.0470603	0.0470603	1.92311	1.82445	1.96128	3.5685	4.23402	5.37098
ENSMUSG00000044068	Zrsr1	2.52704e-05	0.000545457	-0.332169	0.0788557	8.18772	0.0405628	0.00083729	0.00849003	0.00533832	0.00849003	46.3703	40.0707	46.9929	61.0832	68.3961	55.9369
ENSMUSG00000052155	Acvr2a	2.54277e-05	0.000548364	0.317391	0.0753723	7.50096	0.0370382	0.000775034	0.00774645	0.00649348	0.00774645	29.8472	28.1243	35.4112	21.8997	23.0705	22.9695
ENSMUSG00000035864	Syt1	2.55379e-05	0.000550248	-0.249413	0.0592431	9.5659	0.0227921	7.63107e-05	0.00508621	0.0051883	0.0051883	205.364	192.079	187.906	242.45	274.639	232.249
ENSMUSG00000027605	Acss2	2.60894e-05	0.000561632	-0.285629	0.0679235	7.95512	0.029182	0.00128737	0.00459616	0.00563302	0.00563302	54.3732	57.3427	49.4073	77.5436	70.5532	65.7683
ENSMUSG00000034248	Slc25a37	2.63278e-05	0.000566258	0.370542	0.0881591	6.54578	0.0466447	0.00129982	0.00551803	0.0103582	0.0103582	10.1244	11.9079	10.8652	8.32307	7.13433	7.14735
ENSMUSG00000021904	Sema3g	2.63663e-05	0.000566583	0.473338	0.112625	5.91626	0.079356	0.00328014	0.0118965	0.0157465	0.0157465	3.18535	3.42644	3.93529	1.8882	2.17947	2.45854
ENSMUSG00000023004	Tuba1b	2.66103e-05	0.000571317	-0.362932	0.0863983	9.25003	0.0484736	7.00208e-05	0.011127	0.00499155	0.011127	368.685	401.738	309.652	459.961	492.982	545.516
ENSMUSG00000024181	Mrpl28	2.68154e-05	0.00057521	-0.498513	0.118723	6.00357	0.0914687	0.00110399	0.0200388	0.0147672	0.0200388	48.8242	52.7809	51.8514	60.7382	73.5744	62.6736
ENSMUSG00000028207	Asph	2.68532e-05	0.000575512	-0.251812	0.0599748	9.68269	0.0225477	9.6803e-05	0.00430938	0.00529865	0.00529865	298.782	274.333	309.348	369.512	401.805	359.814
ENSMUSG00000027406	Idh3b	2.77401e-05	0.000593992	-0.245718	0.0586262	8.60589	0.0183872	0.000139456	0.000203045	0.00501609	0.00501609	216.911	218.627	215.679	265.253	278.915	267.379
ENSMUSG00000023175	Bsg	2.77695e-05	0.000594094	-0.246193	0.0587428	9.4676	0.0212447	6.45336e-05	0.00376227	0.00511154	0.00511154	546.087	484.8	470.287	609.542	636.545	623.918
ENSMUSG00000020677	Ddx52	2.78649e-05	0.000595608	0.328626	0.0784263	7.02746	0.0345866	0.00126452	0.00147075	0.0079615	0.0079615	33.7712	37.7233	35.8381	25.9901	26.1285	24.2653
ENSMUSG00000032368	Zic1	2.79447e-05	0.000596787	-0.280535	0.0669598	10.1593	0.0289902	0.000198233	0.00652718	0.00598863	0.00652718	325.34	299.864	370.853	417.866	436.285	446.096
ENSMUSG00000042918	Mamstr	2.85781e-05	0.000609776	-1.15864	0.276888	4.41421	0.494736	0.0370681	0.0779325	0.048568	0.0779325	1.16255	0.539655	0.912192	3.20899	1.89192	2.95535
ENSMUSG00000037579	Kcnh3	2.87678e-05	0.000613281	-0.80532	0.192522	5.10983	0.23904	0.0170225	0.0385745	0.0295351	0.0385745	1.68077	2.26361	2.77573	4.57405	6.11903	3.99273
ENSMUSG00000022044	Stmn4	2.89027e-05	0.000615615	-0.275916	0.065978	7.74806	0.0279905	0.000556098	0.00588338	0.00597355	0.00597355	236.228	219.1	201.975	280.235	247.993	288.22
ENSMUSG00000025393	Atp5b	2.89805e-05	0.000616729	-0.249003	0.0595512	9.65395	0.0188793	4.99945e-05	0.000298108	0.00526952	0.00526952	1219.45	1157.21	1189.59	1431.63	1479.69	1422.4
ENSMUSG00000003865	Gys1	2.90346e-05	0.000617337	0.477978	0.114324	5.78604	0.0723281	0.00222015	0.00251643	0.0173848	0.0173848	25.0675	22.7624	20.7868	13.6607	13.2066	13.8516
ENSMUSG00000113216	Gm40841	2.93582e-05	0.000623667	0.602711	0.144245	5.22893	0.111854	0.00423416	-0.000639771	0.0269757	0.0269757	30.2406	28.4009	27.2287	13.7662	15.6885	13.9688
ENSMUSG00000020374	Rasgef1c	2.94779e-05	0.000625661	-0.522307	0.12503	5.68184	0.0957618	0.00459373	0.0128067	0.018855	0.018855	4.38088	3.95164	3.80883	5.55573	7.61225	7.19528
ENSMUSG00000015405	Ace2	2.96588e-05	0.000628949	0.775354	0.185666	5.03825	0.221718	0.0127244	0.0389833	0.0311222	0.0389833	2.41758	3.14782	3.64801	1.08746	1.74135	1.40697
ENSMUSG00000104093	A330015K06Rik	2.97339e-05	0.000629988	1.62736	0.38974	3.13329	0.976763	0.0483875	0.179458	0.155102	0.179458	1.22895	0.609311	0.457173	0.0959028	0.226119	0.0981042
ENSMUSG00000026173	Plcd4	2.97896e-05	0.000630616	0.372193	0.0891467	7.08134	0.0473714	0.0041643	0.00310196	0.00775639	0.00775639	20.5913	21.0373	23.4216	16.0583	15.2616	13.2971
ENSMUSG00000078496	Zfp982	2.98709e-05	0.000631783	0.637704	0.152764	5.62274	0.150004	0.00357289	0.0314323	0.0197536	0.0314323	15.1569	20.5975	18.8264	10.0736	10.974	7.44225
ENSMUSG00000028649	Macf1	2.99663e-05	0.000633249	0.310577	0.0744125	10.9102	0.0311606	0.000207247	0.00257169	0.00809859	0.00809859	236.729	243.915	256.289	174.735	191.891	172.75
ENSMUSG00000006456	Rbm14	2.99942e-05	0.000633283	-0.313686	0.0751612	7.1547	0.0333705	0.000979299	0.0038342	0.00749451	0.00749451	14.2064	12.9572	11.9395	17.6079	18.422	17.0961
ENSMUSG00000049164	Zfp518a	3.02086e-05	0.000637253	0.301453	0.0722582	7.25358	0.0327562	0.000660672	0.00620682	0.00717119	0.00717119	12.6857	12.6791	13.4129	9.07281	8.95655	11.0459
ENSMUSG00000045790	Ccdc149	3.06878e-05	0.000646235	0.340506	0.0816893	7.20069	0.042791	0.00140578	0.00860393	0.00734005	0.00860393	28.1662	23.4092	24.2889	17.6881	19.9073	16.2079
ENSMUSG00000107096	Gm43597	3.0667e-05	0.000646235	0.458685	0.110037	5.91796	0.0681374	0.0024357	0.00383906	0.0157266	0.0157266	23.8306	23.4763	19.9016	14.0647	13.0301	14.6471
ENSMUSG00000028836	Slc30a2	3.07407e-05	0.000646786	1.28632	0.308626	3.47183	0.531239	0.0317278	0.0118352	0.111147	0.111147	0.684175	1.05395	1.20705	0.243168	0.278654	0.247411
ENSMUSG00000037509	Arhgef4	3.10032e-05	0.000651741	-0.288168	0.0691718	7.44477	0.0285813	0.000544751	0.00404165	0.00663236	0.00663236	29.4068	30.4695	25.5932	38.8223	36.9644	36.7384
ENSMUSG00000028393	Alad	3.13307e-05	0.000658053	-0.391617	0.094058	6.74535	0.0566255	0.00150405	0.0117663	0.00923346	0.0117663	26.2394	23.9195	23.3711	37.1103	38.4557	30.3257
ENSMUSG00000020451	Limk2	3.14671e-05	0.000660344	-0.341556	0.0820539	6.71867	0.0401995	0.000727233	0.00577444	0.00937204	0.00937204	57.6073	62.2302	56.9762	77.4425	72.3366	88.3544
ENSMUSG00000042105	Inpp5f	3.22183e-05	0.000675523	-0.244958	0.058924	8.94497	0.0221678	0.000195013	0.00501304	0.00493358	0.00501304	123.931	130.103	124.7	144.497	165.075	174.075
ENSMUSG00000039456	Morc3	3.23811e-05	0.000678348	0.412822	0.0993306	6.425	0.0617256	0.00365126	0.0095975	0.0111486	0.0111486	41.9265	40.3949	44.2424	22.4713	27.8822	31.6058
ENSMUSG00000019558	Slc6a8	3.24405e-05	0.000679005	-0.26303	0.0632951	7.95463	0.0232269	0.000375666	0.00271356	0.00563374	0.00563374	68.4466	61.3891	60.0949	83.6796	78.9468	78.6727
ENSMUSG00000027963	Extl2	3.26902e-05	0.000683639	-0.254133	0.0611799	8.18024	0.0219139	0.000268024	0.00290544	0.00534645	0.00534645	86.0993	89.872	91.3452	108.973	122.823	110.203
ENSMUSG00000032532	Cck	3.29005e-05	0.000687442	-0.490638	0.118158	5.96828	0.0889711	0.00269367	0.0182482	0.0151518	0.0182482	41.3037	40.3282	32.5948	66.9332	59.7872	49.2264
ENSMUSG00000022863	Btg3	3.32063e-05	0.000693231	0.852145	0.205322	5.68429	0.268434	0.0134754	0.0497604	0.0188188	0.0497604	18.0651	23.4417	12.7602	5.97897	8.57155	8.10786
ENSMUSG00000036748	Cuedc2	3.32709e-05	0.00069398	-0.252932	0.0609498	8.22358	0.020583	0.00027174	0.0014666	0.00530057	0.00530057	70.7542	63.8076	64.7402	83.0515	84.2783	83.4475
ENSMUSG00000026439	Rbbp5	3.34093e-05	0.000696267	0.269316	0.0649129	7.87241	0.0234196	0.000560767	0.00151449	0.00575975	0.00575975	65.9889	69.4167	71.7124	54.3003	49.8516	49.7236
ENSMUSG00000020399	Havcr2	3.35387e-05	0.000698363	1.01212	0.244001	4.09995	0.330568	0.0265963	0.00247136	0.0627082	0.0627082	1.95174	1.38005	1.88492	0.596719	0.72729	0.546207
ENSMUSG00000035456	Prdm8	3.36316e-05	0.000699092	0.327629	0.0789969	7.21753	0.0396909	0.000858156	0.0085026	0.00728528	0.0085026	15.7524	15.6706	19.1421	12.369	12.7347	11.0603
ENSMUSG00000022526	Zfp251	3.3617e-05	0.000699092	-0.296192	0.0714152	7.3062	0.0270415	0.000638132	0.000265019	0.00701205	0.00701205	15.7725	15.2646	16.2891	20.9959	21.6321	20.5214
ENSMUSG00000031608	Galnt7	3.36853e-05	0.000699607	-0.422279	0.101827	7.26579	0.0659385	0.000717792	0.0148355	0.00713348	0.0148355	17.9806	19.4965	19.3677	23.8526	30.5282	32.7153
ENSMUSG00000095937	Gm12671	3.38354e-05	0.000701376	-0.410443	0.0989976	7.50929	0.0622997	0.0055346	0.0091662	0.0064736	0.0091662	76.3613	58.8765	73.2533	92.0606	100.712	110.387
ENSMUSG00000094708	Gm10359	3.38354e-05	0.000701376	-0.410443	0.0989976	7.50929	0.0622997	0.0055346	0.0091662	0.0064736	0.0091662	76.3613	58.8765	73.2533	92.0606	100.712	110.387
ENSMUSG00000029463	Fam216a	3.38575e-05	0.000701376	-0.334404	0.0806603	7.12582	0.0413552	0.000705026	0.00905409	0.00759526	0.00905409	35.1866	34.1211	38.4117	43.9136	46.2609	55.2238
ENSMUSG00000005198	Polr2a	3.38962e-05	0.000701577	0.277192	0.0668647	7.92212	0.0284157	0.000279778	0.00642655	0.00568215	0.00642655	39.8793	32.9271	39.924	28.4966	29.1735	27.2939
ENSMUSG00000086894	Gm15708	3.45804e-05	0.000715126	1.40413	0.339081	3.49371	0.729446	0.0427628	0.129701	0.10886	0.129701	1.2948	2.14857	1.81676	0.26971	0.75069	0.329252
ENSMUSG00000039697	Ncoa7	3.47093e-05	0.000717177	-0.264627	0.0639173	8.06626	0.0239546	0.000646941	0.00303613	0.00548119	0.00548119	58.4971	65.0775	63.4062	76.2177	82.3237	83.7136
ENSMUSG00000097545	Mir124a-1hg	3.55731e-05	0.000734398	-0.479567	0.115992	7.36321	0.0851404	0.000348908	0.0198322	0.00684915	0.0198322	97.3986	98.4021	92.6072	152.012	120.321	172.079
ENSMUSG00000026123	Plekhb2	3.5751e-05	0.00073744	-0.240864	0.0582733	8.64425	0.0199539	9.47174e-05	0.00309185	0.00499894	0.00499894	129.087	123.855	115.702	154.029	164.093	146.127
ENSMUSG00000068151	A230006K03Rik	3.60008e-05	0.000741961	1.2364	0.299244	3.56691	0.550138	0.0327196	0.081692	0.101601	0.101601	3.95376	5.75182	2.9826	1.08805	0.788914	1.5807
ENSMUSG00000026726	Cubn	3.61071e-05	0.000743517	0.884981	0.214225	4.1262	0.247673	0.00754886	0.00834556	0.0612899	0.0612899	0.817946	0.685363	0.778756	0.319833	0.351403	0.263155
ENSMUSG00000058298	Mcm9	3.63684e-05	0.00074826	0.681009	0.164916	8.46203	0.171769	0.00578701	0.0350091	0.00509853	0.0350091	100.476	66.7373	100.293	51.7458	43.9558	37.7489
ENSMUSG00000035314	Gdpd5	3.67099e-05	0.000754645	-0.553117	0.134015	5.56391	0.113334	0.00424737	0.0226928	0.0206957	0.0226928	18.7204	14.8912	18.194	31.6225	24.7061	30.1349
ENSMUSG00000020638	Cmpk2	3.6805e-05	0.000755957	0.462222	0.112008	6.09779	0.0791498	0.00111086	0.017708	0.0138132	0.017708	12.7633	15.4638	12.5516	7.29712	9.95533	8.55794
ENSMUSG00000025782	Taf3	3.68773e-05	0.000756798	0.384827	0.0932638	6.34916	0.0489632	0.00135394	0.00431558	0.0116933	0.0116933	12.9608	13.4664	14.0122	10.0565	9.65643	8.34913
ENSMUSG00000093575	Gm20695	3.69903e-05	0.000758474	1.24146	0.300921	3.90293	0.543323	0.061105	0.0400939	0.0747253	0.0747253	6.97404	5.91691	7.93828	1.80088	2.99795	1.26141
ENSMUSG00000011877	Git1	3.7205e-05	0.000762229	0.276727	0.0670987	7.50509	0.0244974	0.00026976	0.00163526	0.00648359	0.00648359	74.4498	68.7958	74.6594	52.8831	56.4777	52.1216
ENSMUSG00000058454	Dhcr7	3.73477e-05	0.000764505	-0.478062	0.115941	5.77072	0.0772146	0.00257165	0.00824296	0.017592	0.017592	20.6718	21.022	17.8806	33.6186	31.4849	27.4339
ENSMUSG00000007041	Clic1	3.7526e-05	0.000767505	-0.333931	0.0810078	6.84688	0.0356882	0.0011074	0.00168665	0.00873598	0.00873598	29.7983	32.688	30.2079	45.2185	41.0226	40.6209
ENSMUSG00000018341	Il12rb2	3.76629e-05	0.000769655	0.804273	0.195147	4.56871	0.231508	0.0137849	0.0330295	0.0433387	0.0433387	2.3226	2.21811	2.02686	1.38706	0.830868	0.79898
ENSMUSG00000063727	Tnfrsf11b	3.84649e-05	0.000785379	0.489392	0.118885	5.74778	0.0835531	0.00329262	0.0113344	0.0179079	0.0179079	7.73751	7.041	5.48406	4.05899	4.07355	4.08495
ENSMUSG00000042111	Ccdc115	3.85171e-05	0.000785782	0.335957	0.0816183	6.81557	0.0366188	0.00110782	0.00234048	0.00888449	0.00888449	30.0872	26.1027	26.6378	19.0305	19.4048	20.1696
ENSMUSG00000020850	Prpf8	3.88131e-05	0.000791151	0.370368	0.0900167	9.28429	0.0508753	8.94567e-05	0.012065	0.00500601	0.012065	91.0869	88.5862	105.026	67.1842	72.4238	58.0446
ENSMUSG00000028780	Sema3c	3.91354e-05	0.000797051	0.569159	0.138397	5.32414	0.104434	0.00369812	0.00536628	0.0250323	0.0250323	9.66127	9.54624	8.5581	4.88748	6.25304	5.7317
ENSMUSG00000041025	Iffo2	3.96227e-05	0.000806295	-0.269304	0.0655294	7.76809	0.0219798	0.000503991	-0.000226068	0.00593717	0.00593717	14.0822	14.2051	14.262	18.3159	18.9162	18.1645
ENSMUSG00000043496	Tril	3.99187e-05	0.000811636	-0.270748	0.0659084	8.39137	0.0272041	0.000268121	0.00624776	0.00514972	0.00624776	28.0031	26.3941	26.7954	33.3645	40.0846	33.4342
ENSMUSG00000025204	Ndufb8	4.03776e-05	0.000820275	-0.28165	0.0686063	7.37475	0.027189	0.000242881	0.00399588	0.00681735	0.00681735	336.65	306.236	277.826	369.596	369.909	364.02
ENSMUSG00000046432	Bex3	4.04365e-05	0.000820783	-0.276376	0.0673271	7.92009	0.0283546	0.000343634	0.00645577	0.00568524	0.00645577	148.32	139.343	127.455	160.171	175.076	189.064
ENSMUSG00000063882	Uqcrh	4.05022e-05	0.000821426	-0.270774	0.0659684	8.50284	0.0272177	0.000225302	0.00630244	0.0050722	0.00630244	571.893	599.788	499.908	655.303	641.81	702.622
ENSMUSG00000089810	Gm16536	4.08021e-05	0.000826815	0.343773	0.0837881	6.75748	0.0419265	0.00135909	0.00673154	0.00917157	0.00917157	31.378	28.5678	31.6051	19.034	23.7812	21.1569
ENSMUSG00000030789	Itgax	4.09986e-05	0.000830102	3.2628	0.79546	1.38432	3.58041	0.0276325	0.455678	0.921501	0.921501	0.896998	0.926234	2.58387	0	0.0897636	0
ENSMUSG00000034981	Parm1	4.15708e-05	0.000840982	-0.276602	0.0674875	7.88373	0.0284181	0.000393438	0.00643841	0.00574171	0.00643841	17.8984	18.803	18.235	26.3867	25.0368	21.1675
ENSMUSG00000108825	Gm45838	4.1819e-05	0.000845296	0.614705	0.150031	5.73267	0.14037	0.0030867	0.0306771	0.0181198	0.0306771	7.20373	9.10141	8.04206	4.1332	3.52187	5.61642
ENSMUSG00000063297	Luzp2	4.28256e-05	0.00086492	-0.238376	0.0582586	9.31598	0.018052	7.02644e-05	0.00118611	0.00502084	0.00502084	146.504	149.71	148.82	184.695	197.434	182.827
ENSMUSG00000037172	E330009J07Rik	4.31604e-05	0.000870954	-0.378513	0.0925488	7.74448	0.05326	0.00015528	0.0126926	0.00598014	0.0126926	64.568	65.8298	75.596	97.4158	112.177	87.4965
ENSMUSG00000037012	Hk1	4.34794e-05	0.000876659	-0.29748	0.0727661	7.06953	0.0287006	0.000141996	0.00254836	0.00780037	0.00780037	106.564	97.0269	99.1437	125.688	136.123	123.614
ENSMUSG00000015852	Fcrls	4.41515e-05	0.000888092	0.917731	0.22468	6.21051	0.313246	0.00306284	0.072659	0.0127978	0.072659	23.6253	21.6357	29.3951	9.68171	6.85282	13.9518
ENSMUSG00000109123	Gm39059	4.41287e-05	0.000888092	3.39636	0.831478	1.34999	3.60737	0.084204	0.0992775	0.95283	0.95283	4.6834	5.45702	5.24015	0	0	0.202765
ENSMUSG00000021288	Klc1	4.41566e-05	0.000888092	-0.240225	0.0588125	8.8915	0.0197181	0.000252049	0.0027552	0.00493632	0.00493632	315.498	300.898	317.087	353.722	375.971	407.875
ENSMUSG00000110588	Gm45774	4.47321e-05	0.000898919	-1.19931	0.293835	4.13413	0.53511	0.0220013	0.107508	0.0608713	0.107508	0.549671	0.291042	0.742166	2.01208	1.58967	1.37545
ENSMUSG00000032252	Glce	4.50293e-05	0.000903561	0.355245	0.0870692	7.58305	0.046957	0.000493766	0.0108778	0.00630503	0.0108778	49.0298	49.0063	62.1041	37.0849	37.8983	35.9747
ENSMUSG00000035929	H2-Q4	4.50379e-05	0.000903561	0.800616	0.19623	5.64412	0.238503	0.00484101	0.0529183	0.0194231	0.0529183	6.7611	8.3272	8.55215	4.59977	3.69582	2.47198
ENSMUSG00000038690	Atp5j2	4.51341e-05	0.000904741	-0.286427	0.0702114	7.41324	0.0296312	0.000680499	0.00559328	0.00671397	0.00671397	184.462	165.093	163.629	230.091	201.7	198.995
ENSMUSG00000015202	Cnksr3	4.5328e-05	0.000907875	-0.46725	0.114564	7.71017	0.0812468	0.000437669	0.0192498	0.00604451	0.0192498	24.5524	22.1648	25.9062	36.9898	46.6749	32.8886
ENSMUSG00000014599	Csf1	4.54541e-05	0.000908992	0.39197	0.0961218	6.57368	0.0522898	0.00367097	0.00407607	0.0101881	0.0101881	16.4936	16.6776	16.8021	11.9443	9.84376	10.6907
ENSMUSG00000079364	Gm3558	4.5459e-05	0.000908992	0.628005	0.154005	5.19768	0.140094	0.00793752	0.0192841	0.0276387	0.0276387	5.82764	6.87518	5.63745	2.56266	3.37586	3.79012
ENSMUSG00000036199	Ndufa13	4.62461e-05	0.000923966	-0.255715	0.0627701	7.97443	0.0216389	0.000304973	0.0022224	0.00560516	0.00560516	92.1958	90.0893	88.6377	105.117	120.753	115.334
ENSMUSG00000097311	Gm26871	4.62873e-05	0.000924026	1.10449	0.271133	3.81564	0.395894	0.029436	0.007968	0.0808333	0.0808333	9.41632	7.00676	7.32589	1.94214	3.09747	2.37404
ENSMUSG00000045201	Lrrc3b	4.65218e-05	0.000927941	-0.328455	0.0806531	6.88366	0.0342593	0.00119058	0.00117742	0.0085668	0.0085668	29.3099	29.3935	25.9693	38.0875	37.9693	38.0289
ENSMUSG00000037921	Ddx60	4.69154e-05	0.00093502	0.897487	0.220487	4.05871	0.255377	0.00788247	0.00928193	0.065039	0.065039	1.58364	1.85085	2.07282	0.584586	0.775505	0.644303
ENSMUSG00000027447	Cst3	4.76636e-05	0.000949149	0.404507	0.0994658	9.14264	0.06096	6.83832e-05	0.0147718	0.00495674	0.0147718	1111.27	899.64	816.944	569.189	575.296	653.851
ENSMUSG00000071866	Ppia	4.82127e-05	0.000958894	-0.265412	0.0653061	10.2216	0.0254402	0.000286756	0.00509714	0.00611058	0.00611058	1505.75	1377.43	1269.08	1674.31	1673.34	1862.33
ENSMUSG00000022376	Adcy8	4.82323e-05	0.000958894	0.30485	0.0750117	7.68128	0.0346321	0.000455415	0.00798471	0.00610053	0.00798471	12.9011	14.2013	16.0339	10.6023	9.80752	11.2354
ENSMUSG00000033768	Nrxn2	4.88058e-05	0.000969499	-0.376713	0.0927575	9.41368	0.0528986	0.000624332	0.0122816	0.00507549	0.0122816	128.315	115.793	149.943	194.635	203.204	170.672
ENSMUSG00000020894	Vamp2	4.92197e-05	0.000976917	-0.255024	0.0628246	9.21684	0.0242475	4.44961e-05	0.0058759	0.0049791	0.0058759	502.762	451.818	422.94	530.524	581.296	590.602
ENSMUSG00000008036	Ap2s1	4.93842e-05	0.00097938	-0.378954	0.0933725	6.99195	0.0535441	0.000347674	0.01273	0.00810293	0.01273	171.526	166.659	140.585	175.718	202.827	217.62
ENSMUSG00000020785	Camkk1	4.9658e-05	0.000984001	-0.286803	0.0706894	7.60784	0.0281584	0.00124416	0.00310789	0.00625131	0.00625131	20.2388	17.8038	17.6204	24.0525	23.5487	25.8803
ENSMUSG00000105419	Gm43205	4.97611e-05	0.000985238	0.666601	0.164319	4.99145	0.147301	0.00831611	0.00917551	0.0321851	0.0321851	5.35957	5.98064	5.27433	3.19194	3.00962	2.2856
ENSMUSG00000073422	H2-Ke6	4.99556e-05	0.000988278	-0.393113	0.0969253	6.35675	0.05315	0.00245484	0.00603106	0.0116369	0.0116369	41.101	40.9584	36.4322	61.8625	51.3131	52.5722
ENSMUSG00000020658	Efr3b	5.00679e-05	0.000989691	0.246608	0.060811	8.26257	0.0219393	0.00028521	0.00433314	0.00526176	0.00526176	86.7383	77.1256	82.3218	61.3487	68.934	60.3073
ENSMUSG00000027326	Knl1	5.18693e-05	0.00102446	1.15373	0.285079	3.72707	0.436669	0.0342946	0.0123864	0.0876103	0.0876103	0.455095	0.806618	0.621137	0.151841	0.271994	0.185356
ENSMUSG00000032691	Nlrp3	5.19244e-05	0.00102471	2.07019	0.511564	3.67145	1.59974	0.103556	0.28899	0.092199	0.28899	1.74896	0.399507	1.70486	0.148893	0.091889	0.15496
ENSMUSG00000052504	Epha3	5.20325e-05	0.00102601	-0.410119	0.101356	6.0329	0.0589607	0.000950651	0.00967619	0.014459	0.014459	6.97021	7.21282	7.67679	10.1461	13.0051	10.2053
ENSMUSG00000025927	Tfap2b	5.2434e-05	0.00103308	-0.408994	0.101123	7.00966	0.0624539	0.00155379	0.0137851	0.00803176	0.0137851	23.7627	19.2133	18.2387	30.9469	32.4681	26.716
ENSMUSG00000027673	Ndufb5	5.27618e-05	0.00103869	-0.261101	0.0645802	7.86322	0.020854	0.000481322	2.11141e-05	0.00577459	0.00577459	212.198	219.271	214.101	271.533	261.645	262.569
ENSMUSG00000003657	Calb2	5.37537e-05	0.00105736	0.394	0.0975567	10.1206	0.0579915	3.2611e-05	0.0142434	0.00591668	0.0142434	1183.91	1045.24	1111.47	619.285	767.413	829.305
ENSMUSG00000031820	Babam1	5.41467e-05	0.00106422	-0.443963	0.109974	5.91864	0.0736441	0.00133894	0.0168026	0.0157185	0.0168026	73.0595	61.9679	63.4354	84.9576	84.3302	86.1844
ENSMUSG00000052125	F730043M19Rik	5.42321e-05	0.00106504	-0.393347	0.0974452	6.3844	0.0556696	0.00280814	0.00875816	0.0114352	0.0114352	20.7184	21.4139	26.2889	35.2905	31.7125	29.9115
ENSMUSG00000074622	Mafb	5.42791e-05	0.0010651	0.826001	0.204638	4.80142	0.254935	0.00858367	0.0542316	0.0367811	0.0542316	2.91168	2.15708	1.76791	0.962741	1.24264	0.756847
ENSMUSG00000042042	Csgalnact2	5.45081e-05	0.00106872	0.299016	0.074098	7.35628	0.0302462	0.00136734	0.00291156	0.00686844	0.00686844	24.1472	24.1563	27.5537	18.3549	18.3083	19.6395
ENSMUSG00000044117	2900011O08Rik	5.47285e-05	0.00107217	-0.409875	0.101594	7.13362	0.0627848	0.000413492	0.0150684	0.00756778	0.0150684	53.4498	55.4056	43.7067	79.6552	79.2742	76.7434
ENSMUSG00000032028	Nxpe2	5.52691e-05	0.00108189	2.26226	0.561056	2.29495	1.83003	0.102313	0.266039	0.369862	0.369862	1.09344	1.95024	1.9191	0.0398108	0.25583	0.210242
ENSMUSG00000045348	Nyap1	5.58804e-05	0.00109297	-0.282398	0.0700814	7.50812	0.0298182	0.000540797	0.00682631	0.00647638	0.00682631	17.2566	15.2083	15.0402	18.9104	21.0455	22.2272
ENSMUSG00000043015	Nemp2	5.66161e-05	0.00110646	0.467357	0.116071	6.00935	0.0706105	0.00550294	0.000851781	0.0147056	0.0147056	9.94915	8.46221	8.16476	5.35835	5.26794	5.82004
ENSMUSG00000033063	Cntnap3	5.67447e-05	0.00110808	1.70147	0.422626	3.22436	1.0804	0.126434	0.13843	0.141486	0.141486	0.542237	0.809192	1.05616	0.124754	0.272061	0.071632
ENSMUSG00000037336	Mfsd2b	5.72864e-05	0.00111775	0.683634	0.169901	5.61253	0.174847	0.0154602	0.0278394	0.0199137	0.0278394	5.58027	6.74565	4.24889	2.84019	2.20076	3.20627
ENSMUSG00000047090	Tmem198b	5.76036e-05	0.00112155	-0.363942	0.0904784	6.76195	0.0495598	0.00124926	0.0110303	0.00914892	0.0110303	11.9832	9.92928	12.8412	15.7839	15.6415	17.9296
ENSMUSG00000022508	Bcl6	5.762e-05	0.00112155	0.513683	0.127707	8.2096	0.098732	0.000309604	0.0241541	0.00531505	0.0241541	42.8773	47.4176	59.9113	29.6239	33.8736	25.6781
ENSMUSG00000034755	Pcdh11x	5.76193e-05	0.00112155	0.56997	0.141701	5.57705	0.121555	0.00332334	0.0267953	0.0204811	0.0267953	3.09577	3.79783	3.96872	1.94312	1.68918	2.5928
ENSMUSG00000015766	Eps8	5.78718e-05	0.00112554	0.413346	0.102789	7.76086	0.0639352	0.000142288	0.015706	0.00595022	0.015706	131.394	132.218	167.625	88.1827	86.9362	99.2623
ENSMUSG00000041797	Abca9	5.79625e-05	0.0011264	0.561309	0.139596	6.08181	0.117905	0.00142452	0.027806	0.0139677	0.027806	5.54486	5.95419	5.85386	2.91267	4.39834	2.78627
ENSMUSG00000094841	Gm10610	5.84123e-05	0.00113423	3.62076	0.90088	1.11723	4.19174	0.0244425	0.299024	1.19293	1.19293	1.03153	0.19769	0.468743	0	0	0
ENSMUSG00000002808	Epdr1	5.85537e-05	0.00113606	-0.309065	0.0769093	6.91075	0.03527	0.000426577	0.00784051	0.00844598	0.00844598	62.4027	72.8498	70.8449	85.6135	91.8858	91.6251
ENSMUSG00000041958	Pigs	5.86175e-05	0.00113639	-0.246845	0.06143	8.18049	0.0201684	0.000314299	0.00204652	0.00534618	0.00534618	46.1358	45.3667	46.9247	56.9718	62.6479	54.7891
ENSMUSG00000038801	Scgb1c1	5.94056e-05	0.00115074	3.23126	0.804765	1.45868	3.59001	0.11456	0.457565	0.856911	0.856911	2.48175	6.49896	5.87046	0	0.396899	0
ENSMUSG00000039016	Timm8b	5.99135e-05	0.00115965	-0.317203	0.0790408	7.40859	0.0376822	0.000630879	0.0087403	0.00672623	0.0087403	247.4	237.299	223.2	258.084	301.271	333.626
ENSMUSG00000097695	Gm26905	6.02573e-05	0.00116538	0.352024	0.0877471	7.71286	0.0464158	0.00133577	0.0102136	0.00603936	0.0102136	17.6069	20.1804	16.8395	13.8279	13.5245	11.0846
ENSMUSG00000003352	Cacnb3	6.04124e-05	0.00116744	-0.331538	0.0826531	7.85325	0.041173	0.00182443	0.00842288	0.00579086	0.00842288	33.7127	33.8728	27.9642	46.413	39.2212	45.4416
ENSMUSG00000074170	Plekhf1	6.05312e-05	0.0011688	-0.417153	0.104009	6.57289	0.0651866	0.00135239	0.0148745	0.0101929	0.0148745	3.80124	3.50556	4.38223	5.85601	6.71559	5.11142
ENSMUSG00000025964	Adam23	6.0992e-05	0.00117676	-0.246254	0.0614263	8.87592	0.0200354	0.000721946	0.00158185	0.00493784	0.00493784	88.0719	88.5818	94.841	116.287	119.825	108.833
ENSMUSG00000000142	Axin2	6.17085e-05	0.00118964	0.486608	0.121464	5.66562	0.0770898	0.00303354	0.00453333	0.0190969	0.0190969	13.9425	15.6881	17.0294	10.4662	9.88113	11.295
ENSMUSG00000002274	Metrn	6.25577e-05	0.00120505	-0.545561	0.13629	8.53778	0.111581	0.000273822	0.0275886	0.00505152	0.0275886	128.574	145.136	158.775	265.694	279.802	189.71
ENSMUSG00000028478	Clta	6.28216e-05	0.00120917	-0.238058	0.0594854	8.47914	0.0195248	0.000220572	0.00293353	0.0050872	0.0050872	197.9	190.849	209.505	234.838	236.884	264.937
ENSMUSG00000098188	Sowahc	6.29525e-05	0.00121072	0.378338	0.09455	6.69255	0.0536695	0.00117774	0.0122318	0.00951107	0.0122318	9.7006	10.2672	9.06293	7.24634	7.2057	5.51874
ENSMUSG00000042444	Mindy2	6.30566e-05	0.00121121	-0.236988	0.0592313	8.71853	0.0210591	6.18809e-05	0.00520063	0.00497146	0.00520063	89.0363	88.7978	101.72	114.763	125.813	110.635
ENSMUSG00000042032	Mat2b	6.3078e-05	0.00121121	-0.273485	0.0683544	7.40646	0.0237292	0.000276617	0.00133703	0.00673187	0.00673187	94.516	94.129	102.203	120.188	129.686	125.314
ENSMUSG00000035049	Rrp12	6.32614e-05	0.00121377	0.302443	0.0756051	7.03804	0.0317953	0.000653883	0.00478829	0.00792031	0.00792031	10.5552	11.2539	11.7349	8.25758	8.93366	7.48388
ENSMUSG00000032231	Anxa2	6.40895e-05	0.00122868	0.421536	0.105457	5.9971	0.060584	0.00184521	0.00725016	0.0148366	0.0148366	31.442	34.0712	28.7981	22.7063	17.6441	19.5871
ENSMUSG00000071847	Apcdd1	6.4268e-05	0.00123112	0.276425	0.0691657	7.40167	0.0280786	0.000431235	0.00601294	0.00674461	0.00674461	28.2842	30.7595	34.1832	24.3854	21.6051	23.8655
ENSMUSG00000026341	Actr3	6.45171e-05	0.00123492	0.25657	0.0642123	7.81148	0.0208467	0.000323893	0.00104889	0.00586094	0.00586094	232.775	247.262	252.529	176.086	187.591	184.785
ENSMUSG00000043432	Leng9	6.53462e-05	0.0012498	-0.481763	0.120663	5.74033	0.0839122	0.00382746	0.0140271	0.0180119	0.0180119	4.07718	3.99113	3.22296	5.87527	5.34837	6.99477
ENSMUSG00000041889	Shisa4	6.54206e-05	0.00125016	-0.410718	0.102876	7.26468	0.0633069	0.000709912	0.0151653	0.00713688	0.0151653	36.5838	36.5591	27.846	50.822	44.3406	51.6714
ENSMUSG00000024642	Tle4	6.54685e-05	0.00125016	0.292149	0.0731803	7.18505	0.027345	0.000641258	0.00153343	0.00739178	0.00739178	14.8101	14.6972	13.4356	10.5934	11.1598	10.3461
ENSMUSG00000001120	Pcbp3	6.64823e-05	0.00126852	-0.31494	0.0789612	6.99961	0.0321851	0.00128033	0.00175597	0.00807198	0.00807198	42.5106	37.9353	38.7482	49.5427	54.1256	54.2529
ENSMUSG00000005371	Fbxo11	6.69794e-05	0.00127699	0.237355	0.0595356	8.56538	0.0189784	0.000280352	0.00231617	0.00503639	0.00503639	130.28	132.773	139.35	98.9431	109.012	110.049
ENSMUSG00000029570	Lfng	6.70742e-05	0.00127716	-0.391414	0.0981865	6.50444	0.0575301	0.00377741	0.0106835	0.0106186	0.0106835	26.2649	20.4787	21.014	28.9913	35.3535	32.4584
ENSMUSG00000020573	Pik3cg	6.70938e-05	0.00127716	0.721909	0.181095	4.71057	0.18619	0.010002	0.0273035	0.0391909	0.0391909	1.32219	1.19605	1.79757	0.67368	0.815912	0.602669
ENSMUSG00000038459	Abhd17c	6.7586e-05	0.00128477	0.308603	0.0774484	6.96831	0.0354546	0.000797444	0.00780742	0.00819994	0.00819994	25.0912	25.7787	27.4564	18.3288	21.6952	17.3968
ENSMUSG00000058163	Gm5431	6.75999e-05	0.00128477	1.46069	0.366587	3.33777	0.752891	0.0750915	0.0659134	0.126487	0.126487	0.90255	0.880728	0.868015	0.108829	0.214881	0.320953
ENSMUSG00000042700	Sipa1l1	6.80792e-05	0.00129286	-0.308988	0.0775786	7.03077	0.0345008	0.00107909	0.00624444	0.00794856	0.00794856	19.0248	15.7753	16.2021	24.7761	21.5181	22.5724
ENSMUSG00000033355	Rtp4	6.81601e-05	0.00129338	1.08771	0.273113	4.81223	0.44444	0.0142552	0.0976309	0.0365049	0.0976309	8.18747	11.3412	9.34814	3.80212	4.31082	1.86466
ENSMUSG00000002504	Slc9a3r2	6.86477e-05	0.00130161	-0.256472	0.0644252	7.93277	0.0223411	0.000559826	0.0026998	0.00566609	0.00566609	48.0985	54.0415	55.3374	64.8492	66.1824	67.181
ENSMUSG00000062044	Lmtk3	6.96439e-05	0.00131947	-0.341058	0.085747	6.82091	0.0417879	0.00216994	0.00644463	0.00885887	0.00885887	43.731	37.6061	41.0277	50.4166	52.0139	60.4825
ENSMUSG00000021266	Wars	6.97647e-05	0.00132072	0.411489	0.103465	7.85698	0.063643	0.000698301	0.0153592	0.00578474	0.0153592	75.233	66.1697	84.6998	53.4352	52.7516	43.0627
ENSMUSG00000112622	Gm47164	7.03682e-05	0.0013311	0.241849	0.060842	8.43835	0.0205253	0.00043773	0.00328472	0.00511489	0.00511489	44.9616	47.6083	40.3596	33.437	35.0534	35.5077
ENSMUSG00000040420	Cdh18	7.06162e-05	0.00133456	-0.267169	0.067226	7.58322	0.0246232	0.00047434	0.00353731	0.00630465	0.00630465	37.9619	35.7465	38.6773	49.3266	50.7566	44.7015
ENSMUSG00000022361	Zhx1	7.06615e-05	0.00133456	-0.241948	0.0608819	8.21294	0.020642	0.000248343	0.00360212	0.00531157	0.00531157	43.3245	41.751	48.1613	57.2636	57.5925	54.58
ENSMUSG00000029426	Scarb2	7.08153e-05	0.00133642	0.231968	0.0583784	8.6983	0.0168004	0.00013385	0.000688131	0.0049782	0.0049782	87.5174	82.8264	85.6682	69.3405	68.4219	65.6466
ENSMUSG00000022518	4930562C15Rik	7.09458e-05	0.00133784	0.670631	0.168793	5.24385	0.162023	0.0160738	0.0177996	0.026663	0.026663	8.16573	9.56091	10.0806	3.98902	6.0778	4.07089
ENSMUSG00000016319	Slc25a5	7.11043e-05	0.00133979	-0.230229	0.0579548	9.03795	0.0172124	0.000100207	0.0015383	0.00493792	0.00493792	372.866	398.468	400.193	449.118	472.578	487.874
ENSMUSG00000039095	En2	7.12169e-05	0.00134086	-0.237435	0.0597744	8.44771	0.0200623	0.000251146	0.00368591	0.00510833	0.00510833	45.7088	49.4881	53.752	59.518	63.6366	65.0333
ENSMUSG00000039671	Zmynd8	7.13568e-05	0.00134245	-0.31376	0.0789985	7.14903	0.0354502	0.0018471	0.00554865	0.00751405	0.00751405	58.3886	51.1244	49.8874	75.616	72.7138	73.9226
ENSMUSG00000035697	Arhgap45	7.15295e-05	0.00134465	0.57183	0.143996	5.26972	0.113438	0.00497464	0.0142014	0.0261278	0.0261278	2.66864	2.41459	2.01477	1.49157	1.11654	1.36407
ENSMUSG00000031659	Adcy7	7.21141e-05	0.00135459	0.39907	0.100542	6.31808	0.0533979	0.00323482	0.00379114	0.0119281	0.0119281	4.09985	4.96591	4.37609	3.19533	3.05524	2.78691
ENSMUSG00000064345	mt-Nd2	7.2525e-05	0.00136125	-0.359853	0.0906921	11.6752	0.0456271	9.3721e-06	0.00846432	0.0123282	0.0123282	5763.72	6734.27	7124.3	9047.76	9428.55	8571.34
ENSMUSG00000034587	8430429K09Rik	7.35808e-05	0.00138	-0.840346	0.211973	4.15923	0.2499	0.0078223	0.0397346	0.0595766	0.0595766	9.48487	5.68894	7.25231	13.353	14.6212	19.3408
ENSMUSG00000030811	Fbxl19	7.37917e-05	0.00138288	-0.351385	0.0886505	7.52584	0.0451416	0.00535375	0.00477142	0.0064346	0.0064346	14.8938	15.8949	18.4573	25.8107	21.838	21.6378
ENSMUSG00000074649	BC029722	7.38602e-05	0.00138309	-0.365439	0.0922011	6.95684	0.0502649	0.0015619	0.0111897	0.00824782	0.0111897	24.57	22.5689	18.331	29.9296	32.6156	29.6053
ENSMUSG00000011171	Vipr2	7.39283e-05	0.0013833	-1.76291	0.44481	2.90223	1.03602	0.0997981	0.0297852	0.196986	0.196986	1.03063	0.406646	0.881681	4.29875	3.60482	4.66286
ENSMUSG00000041571	Selenow	7.46601e-05	0.00139483	-0.230144	0.0581035	9.13776	0.0175045	0.000108492	0.0019098	0.00495554	0.00495554	644.554	558.746	598.395	735.792	721.519	690.521
ENSMUSG00000049148	Plcxd3	7.46523e-05	0.00139483	-0.312927	0.079003	7.14539	0.0368668	0.0013288	0.00803342	0.00752668	0.00803342	15.3892	16.4379	19.1112	23.0529	24.4724	21.3712
ENSMUSG00000005338	Cadm3	7.49581e-05	0.00139824	-0.314672	0.0794632	10.3227	0.0372829	7.58027e-05	0.0093958	0.00632645	0.0093958	421.513	346.018	427.968	522.535	579.018	514.77
ENSMUSG00000063576	Klhdc3	7.49235e-05	0.00139824	-0.272654	0.0688505	8.55071	0.0279905	0.000199517	0.00691107	0.0050443	0.00691107	112.941	93.8094	99.1181	135.053	138.888	123.34
ENSMUSG00000048920	Fkrp	7.51134e-05	0.00140005	-0.351632	0.0888077	6.46079	0.0392759	0.000925353	0.00180262	0.0109049	0.0109049	15.9755	14.425	14.2602	20.3989	20.9926	20.4614
ENSMUSG00000116604	AC087898.2	7.55175e-05	0.0014065	0.998211	0.252188	4.75923	0.375246	0.0109417	0.0844567	0.0378797	0.0844567	4.23166	3.96296	3.81529	1.24549	1.02649	2.36952
ENSMUSG00000053291	Rab4b	7.69723e-05	0.00143249	-0.308567	0.0780463	6.96478	0.0332242	0.000922226	0.00490301	0.00821462	0.00821462	71.5916	68.3794	60.0859	86.7123	83.7762	83.7276
ENSMUSG00000040118	Cacna2d1	7.79106e-05	0.00144884	0.240579	0.0608948	8.31422	0.0208879	0.000348382	0.00405704	0.00521388	0.00521388	57.5995	61.8268	64.4028	46.1818	46.1665	52.6688
ENSMUSG00000017943	Gdap1l1	7.95261e-05	0.00147774	-0.271699	0.0688575	7.90233	0.0278358	0.000493149	0.00661888	0.00571253	0.00661888	56.5203	46.5515	56.8254	66.4742	68.4347	70.1424
ENSMUSG00000036052	Dnajb5	8.06865e-05	0.00149815	-0.256174	0.0649801	8.36713	0.0234191	0.00116467	0.00349977	0.00516895	0.00516895	42.3657	46.7653	45.9132	53.747	56.9065	62.3883
ENSMUSG00000029061	Mmp23	8.08019e-05	0.00149914	-0.689671	0.174954	4.92981	0.162014	0.0122918	0.0118579	0.0336217	0.0336217	6.16003	6.39731	4.67977	11.6409	11.8949	9.22331
ENSMUSG00000055435	Maf	8.09476e-05	0.0015007	-0.265948	0.0674724	7.62882	0.0254976	0.000621794	0.00472722	0.00620699	0.00620699	17.5494	15.4084	16.5769	19.9947	23.2034	21.2763
ENSMUSG00000110390	Gm45869	8.11239e-05	0.00150281	-0.756023	0.191832	5.81	0.215631	0.00295904	0.0522405	0.0170669	0.0522405	6.61905	4.83732	5.41149	15.1115	8.41253	12.2786
ENSMUSG00000053626	Tll1	8.17855e-05	0.00151391	-0.342825	0.0870312	6.55354	0.0435123	0.00105118	0.00926586	0.0103105	0.0103105	7.94724	9.6274	10.256	12.3155	13.5924	12.7264
ENSMUSG00000045009	Prrt3	8.19453e-05	0.00151506	-0.292627	0.0742964	7.26443	0.0293521	0.00114228	0.00343645	0.00713765	0.00713765	11.3051	12.6315	13.4969	15.6942	16.8767	17.0375
ENSMUSG00000022095	Fam160b2	8.19733e-05	0.00151506	-0.26816	0.068086	7.52629	0.0256424	0.000520001	0.00456681	0.00643355	0.00643355	15.3133	13.4381	13.869	17.0589	19.5036	18.59
ENSMUSG00000026484	Rnf2	8.24057e-05	0.00152189	0.362552	0.0920815	6.40695	0.0489557	0.00144384	0.0104593	0.0112747	0.0112747	52.2334	54.082	63.2744	34.7889	36.8695	44.7349
ENSMUSG00000029228	Lnx1	8.25674e-05	0.00152372	-0.471535	0.119775	6.74008	0.0839189	0.00190622	0.019613	0.00926055	0.019613	11.7058	10.2528	9.99461	18.9494	13.7923	19.0045
ENSMUSG00000004187	Kifc2	8.28735e-05	0.0015274	-0.412816	0.104884	8.8822	0.0643259	0.000485885	0.0160151	0.00493719	0.0160151	77.9771	66.758	55.9264	97.5684	94.2729	106.246
ENSMUSG00000024790	Sac3d1	8.28937e-05	0.0015274	-0.430809	0.109457	5.95291	0.0675018	0.0026472	0.0121314	0.015324	0.015324	9.44618	10.7464	9.54568	12.5776	15.2952	17.6075
ENSMUSG00000070802	Pnmal2	8.30045e-05	0.0015278	-0.347396	0.0882711	9.11364	0.0455553	0.000113525	0.0115742	0.00495004	0.0115742	70.3174	69.8202	54.4825	86.5384	94.2071	89.9404
ENSMUSG00000019489	Cd70	8.30414e-05	0.0015278	-1.21069	0.307638	3.5672	0.490663	0.0403875	0.0232733	0.101574	0.101574	1.6284	0.831035	1.13932	3.40428	3.60055	4.42215
ENSMUSG00000053368	Rxfp2	8.32994e-05	0.00153138	3.132	0.795995	1.64709	3.70316	0.0761949	0.874216	0.711719	0.874216	0.326285	0.41433	0.619627	0	0	0.0820686
ENSMUSG00000072501	Phf20l1	8.35933e-05	0.00153561	0.27992	0.0711567	8.85421	0.0295826	0.00044911	0.00714581	0.0049405	0.00714581	107.202	108.644	123.259	77.3715	87.3884	91.7919
ENSMUSG00000018239	Zcchc10	8.46689e-05	0.00155419	0.542778	0.138084	5.35669	0.111263	0.00398479	0.0246159	0.0243964	0.0246159	22.3944	22.4	19.5352	9.2412	13.6652	13.2183
ENSMUSG00000005161	Prdx2	8.49427e-05	0.00155804	-0.237287	0.0603782	8.5776	0.0186808	0.000438266	0.0017984	0.00503002	0.00503002	218.947	216.124	197.82	249.287	269.281	262.86
ENSMUSG00000026725	Tnn	8.59427e-05	0.00157518	-2.54104	0.647037	2.86743	2.43946	0.104627	0.523359	0.204249	0.523359	0.0820467	0.0496338	0.0074541	0.548192	0.326061	0.509992
ENSMUSG00000026024	Als2	8.68338e-05	0.00159031	-0.359558	0.0916138	8.63473	0.0488562	0.000130281	0.0124593	0.00500301	0.0124593	63.4646	56.7119	69.4195	90.6538	100.553	78.9899
ENSMUSG00000055653	Gpc3	8.73239e-05	0.00159807	0.601661	0.153354	5.11501	0.129439	0.00585418	0.0201963	0.0294219	0.0294219	5.76284	5.8642	4.37519	3.35583	2.91748	2.3293
ENSMUSG00000023902	Zscan10	8.79137e-05	0.00160765	1.26026	0.321353	3.53856	0.596792	0.0505597	0.0998331	0.104342	0.104342	3.10588	2.1987	3.3247	1.30805	0.555797	0.849274
ENSMUSG00000036885	Arhgef26	8.80795e-05	0.00160946	-0.316884	0.0808112	7.14077	0.0349515	0.00225295	0.00378078	0.00754273	0.00754273	31.9412	26.6312	27.5595	38.02	41.8481	36.7766
ENSMUSG00000030647	Ndufc2	8.91997e-05	0.0016287	-0.321183	0.0819713	7.57441	0.0390107	0.000432198	0.00964675	0.00632409	0.00964675	249.83	226.413	213.59	266.529	286.879	339.304
ENSMUSG00000068015	Lrch1	8.94637e-05	0.00163229	0.472384	0.120582	7.24978	0.084392	0.0142989	0.0075112	0.00718302	0.0075112	35.2154	48.371	38.8801	26.6041	26.7314	21.4303
ENSMUSG00000075304	Sp5	8.97237e-05	0.00163457	-0.670341	0.171144	4.83128	0.13612	0.00791217	-0.00627036	0.0360232	0.0360232	1.76062	1.62871	1.6881	3.16719	3.35849	3.27752
ENSMUSG00000025790	Slco3a1	8.96847e-05	0.00163457	-0.432241	0.110352	5.76053	0.0590275	0.000535005	0.00318715	0.0177314	0.0177314	20.2585	21.4966	20.5479	30.6568	27.4823	30.0839
ENSMUSG00000103821	D430013B06Rik	9.00907e-05	0.00164002	1.30682	0.333726	4.15367	0.645979	0.0188661	0.148194	0.0598594	0.148194	3.12297	3.87283	3.55435	1.52821	1.06864	0.493989
ENSMUSG00000035674	Ndufa3	9.02944e-05	0.00164249	-0.321093	0.0820101	6.84015	0.0336111	0.00132093	0.00203009	0.00876754	0.00876754	209.122	210.592	190.903	250.153	248.905	264.302
ENSMUSG00000031838	Ifi30	9.1712e-05	0.00166702	0.580129	0.148312	5.39394	0.127361	0.00426272	0.0287321	0.0236871	0.0287321	14.5514	14.3797	16.8556	7.53715	10.7804	6.97863
ENSMUSG00000022899	Slc15a2	9.19646e-05	0.00167036	-0.709273	0.181359	6.4193	0.19039	0.00184793	0.0474889	0.0111881	0.0474889	26.0319	24.4602	42.4868	63.271	59.0225	48.8722
ENSMUSG00000032551	1110059G10Rik	9.30961e-05	0.00168964	0.331918	0.0849347	7.28417	0.0343395	0.00374325	-0.0021324	0.00707761	0.00707761	34.4739	34.666	35.5767	23.6602	25.8936	24.9427
ENSMUSG00000096764	Gm21985	9.35887e-05	0.00169603	-0.572113	0.146446	6.00983	0.103984	0.0174692	-0.0102312	0.0147006	0.0147006	2.66254	3.03378	2.66424	4.42487	5.04326	5.37205
ENSMUSG00000034324	Tmem132c	9.35709e-05	0.00169603	-0.61145	0.156514	6.35237	0.141557	0.00278123	0.0339636	0.0116694	0.0339636	6.63817	6.19178	5.08932	11.477	13.2779	8.40367
ENSMUSG00000095139	Pou3f2	9.38771e-05	0.00169875	0.346444	0.0886977	6.54752	0.0394145	0.00145342	0.00280594	0.0103475	0.0103475	6.98054	7.14981	6.16063	4.62098	4.64096	5.03988
ENSMUSG00000021270	Hsp90aa1	9.38794e-05	0.00169875	-0.259933	0.0665489	8.91111	0.025584	7.40119e-05	0.00656913	0.00493487	0.00656913	719.417	852.119	791.781	894.706	970.217	1005.27
ENSMUSG00000031201	Brcc3	9.54683e-05	0.00172621	0.271584	0.0696041	7.45821	0.0226598	0.000668719	-3.09343e-06	0.00659839	0.00659839	48.9923	50.507	46.7874	37.1977	36.418	37.9846
ENSMUSG00000096054	Syne1	9.58669e-05	0.00173212	-0.250097	0.0641138	9.62096	0.0236972	8.36405e-05	0.00608223	0.00523769	0.00608223	149.421	146.761	149.612	193.838	208.384	166.466
ENSMUSG00000026617	Bpnt1	9.64313e-05	0.00174102	-0.275833	0.0707374	7.31494	0.0253365	0.000519209	0.00261992	0.00698646	0.00698646	59.2281	61.1051	63.8003	83.631	78.9043	72.8612
ENSMUSG00000052565	Hist1h1d	9.71928e-05	0.00175346	1.0471	0.268659	3.80849	0.35091	0.0269085	0.000575873	0.0813576	0.0813576	0.626335	0.474039	0.420286	0.150827	0.189101	0.185255
ENSMUSG00000020849	Ywhae	9.74581e-05	0.00175694	-0.228205	0.0585618	8.75605	0.0175726	0.000183794	0.00225275	0.00496042	0.00496042	473.362	523.052	495.563	597.355	566.427	604.904
ENSMUSG00000026895	Ndufa8	9.78702e-05	0.00176305	-0.261247	0.0670584	7.59672	0.0236014	0.000470027	0.00343791	0.00627522	0.00627522	120.059	115.709	103.037	139.367	139.002	149.114
ENSMUSG00000029993	Nfu1	9.80339e-05	0.00176468	0.30914	0.07936	6.8863	0.0314114	0.000892154	0.00253441	0.00855486	0.00855486	86.697	79.5521	89.9577	60.7768	56.2893	62.3631
ENSMUSG00000025612	Bach1	9.82658e-05	0.00176754	0.364303	0.0935349	6.29958	0.0408324	0.00105183	0.000219939	0.0120713	0.0120713	13.5146	13.1653	12.6051	8.85318	9.32592	9.17814
ENSMUSG00000029120	Ppp2r2c	9.89105e-05	0.00177781	-0.287619	0.0738764	6.99008	0.0272412	7.60761e-05	0.00295361	0.00811051	0.00811051	195.057	191.013	208.185	241.501	257.298	221.536
ENSMUSG00000041775	Mapk1ip1	9.96452e-05	0.00178969	-0.314916	0.080925	6.87584	0.0308038	0.00122096	9.42861e-05	0.00860231	0.00860231	24.2724	24.0946	24.4594	31.9793	31.1698	34.3296
ENSMUSG00000030772	Dkk3	0.000100144	0.00179731	0.310995	0.0799423	6.88561	0.0301717	0.00102816	0.000417163	0.008558	0.008558	13.4948	14.0216	12.716	10.0604	9.47771	9.81392
ENSMUSG00000115318	Gm49089	0.000101339	0.00181742	0.966914	0.248733	4.04951	0.344997	0.0272298	0.0534206	0.0655721	0.0655721	1.55884	1.36155	1.33654	0.603175	0.728999	0.336731
ENSMUSG00000089769	Gm16574	0.000101719	0.00182288	-0.902383	0.232187	4.07142	0.25089	0.0165565	-0.00830402	0.0643095	0.0643095	2.59853	2.50139	3.07904	5.89131	6.44932	6.76186
ENSMUSG00000023806	Rsph3b	0.000101821	0.00182335	0.512346	0.131837	6.49915	0.0996068	0.00456159	0.0215099	0.0106527	0.0215099	26.9638	20.9633	25.0682	11.7491	16.851	14.6273
ENSMUSG00000040380	Cbln3	0.000102357	0.00183159	-0.370401	0.0953429	10.5705	0.0520674	1.76303e-05	0.0136178	0.00695748	0.0136178	399.753	359.484	442.047	594.614	636.988	521.483
ENSMUSG00000092492	B230208B08Rik	0.000104589	0.00187014	3.55103	0.915288	1.08237	4.09326	0.0232188	0.364665	1.23341	1.23341	10.3266	5.49321	1.70151	0	0	0
ENSMUSG00000029166	Mapre3	0.000105545	0.00188584	-0.250826	0.064688	8.53484	0.0218804	0.00122361	0.00253417	0.00505319	0.00505319	153.045	140.176	131.644	181.343	169.32	180.766
ENSMUSG00000041115	Iqsec2	0.00010614	0.00189508	-0.491952	0.126919	8.51423	0.0919352	0.000606823	0.0235559	0.00506527	0.0235559	26.1345	22.3149	24.1233	42.6616	45.5279	30.7781
ENSMUSG00000024750	Zfand5	0.000106484	0.00189982	-0.225714	0.0582439	8.85372	0.0179658	0.000147956	0.00320426	0.00494057	0.00494057	244.926	233.728	234.206	268.416	304.821	309.355
ENSMUSG00000052684	Jun	0.000108063	0.00192656	-0.56934	0.14705	7.81114	0.123193	0.000413971	0.0320217	0.00586153	0.0320217	26.2107	20.3605	25.3676	49.1673	45.2851	33.0618
ENSMUSG00000034462	Pkd2	0.000108427	0.00193163	0.236488	0.0610935	8.23015	0.0173016	0.000304747	0.000349837	0.00529387	0.00529387	37.827	36.7648	37.4118	30.8061	28.3987	29.2416
ENSMUSG00000026991	Pkp4	0.000108715	0.00193391	-0.234608	0.060618	9.26179	0.0195895	0.000515487	0.00333101	0.00499633	0.00499633	162.168	158.759	173.501	200.402	223.472	196.974
ENSMUSG00000079410	Gm2897	0.000108707	0.00193391	0.656965	0.169746	5.62253	0.164057	0.00563564	0.0375848	0.0197569	0.0375848	9.69386	10.4995	10.6119	5.10862	7.11004	4.03954
ENSMUSG00000024594	Prrc1	0.000110227	0.00195937	0.27952	0.0722852	7.25317	0.0273268	0.000665272	0.00419397	0.00717245	0.00717245	12.8409	14.1991	14.0099	11.3287	10.2347	9.57841
ENSMUSG00000040037	Negr1	0.000110365	0.00196038	-0.227699	0.0588888	8.45913	0.019064	0.000101351	0.00428599	0.00510049	0.00510049	99.5228	88.1372	85.5262	106.64	113.974	116.32
ENSMUSG00000061132	Blnk	0.000110564	0.00196246	1.08152	0.279741	3.80603	0.444814	0.0223703	0.0950124	0.0815386	0.0950124	2.40375	0.951375	1.677	0.474695	0.501837	0.601468
ENSMUSG00000050017	Pitpnb	0.000111474	0.00197717	0.240862	0.0623324	7.99875	0.0187383	0.000257056	0.00141039	0.00557094	0.00557094	94.5657	87.0924	92.2758	67.7399	70.7772	72.4612
ENSMUSG00000019359	Gdpd2	0.000111599	0.00197794	0.735829	0.190438	5.41982	0.205953	0.0173265	0.0370733	0.0232057	0.0370733	6.32482	6.31586	4.09041	2.02423	2.71876	3.11047
ENSMUSG00000028108	Ecm1	0.000112002	0.00198362	0.561156	0.145264	5.69798	0.117723	0.0130348	0.0160328	0.0186178	0.0186178	25.7012	24.622	20.5134	15.9024	10.4915	13.5834
ENSMUSG00000017466	Timp2	0.000112191	0.00198552	0.491268	0.127186	7.8046	0.0918148	0.000808039	0.0234564	0.0058728	0.0234564	68.7794	60.376	44.7957	33.7888	34.7729	35.2816
ENSMUSG00000078920	Ifi47	0.000113415	0.00200571	0.91229	0.236348	4.19983	0.316714	0.0133683	0.0704223	0.0575732	0.0704223	2.54029	4.35202	2.49701	1.01815	1.5905	1.02598
ENSMUSG00000032181	Scg3	0.000114405	0.00202173	-0.23596	0.0611642	8.0845	0.0182329	0.000153367	0.00175874	0.00545823	0.00545823	390.195	383.426	416.295	456.558	490.523	443.529
ENSMUSG00000046108	Il17c	0.000115874	0.0020462	2.64919	0.687262	1.87436	2.62505	0.141209	0.508286	0.567285	0.567285	1.86296	1.51645	2.15574	0	0.292324	0.13234
ENSMUSG00000040483	Xaf1	0.000116707	0.00205942	0.733694	0.190424	4.74131	0.175978	0.0160354	0.00207238	0.0383568	0.0383568	13.8892	19.0498	15.7432	7.00104	7.77251	7.60309
ENSMUSG00000026676	Ccdc3	0.000117107	0.00206497	0.561147	0.145673	5.26382	0.105125	0.00558189	0.00774219	0.026249	0.026249	3.91825	4.21574	3.74458	2.41509	2.46304	1.87602
ENSMUSG00000033075	Senp1	0.000118123	0.00208136	0.31846	0.082717	7.10323	0.0348164	0.00258699	0.00290229	0.00767617	0.00767617	25.1387	20.8985	21.8715	16.67	16.8628	15.5546
ENSMUSG00000090071	Cdk5r2	0.000118397	0.00208422	-0.250716	0.0651308	7.76146	0.0228479	0.000413897	0.00457411	0.00594913	0.00594913	26.0603	26.5197	27.3715	30.4665	35.5053	36.1975
ENSMUSG00000005360	Slc1a3	0.000118458	0.00208422	-0.311231	0.080854	9.78894	0.0369043	1.44744e-05	0.00979158	0.00541794	0.00979158	771.892	651.188	777.363	966.439	1078.56	872.937
ENSMUSG00000063415	Cyp26b1	0.000118582	0.00208489	0.291594	0.0757577	7.30166	0.0323953	0.000693326	0.00791552	0.00702543	0.00791552	14.2618	13.2926	15.8173	9.91192	11.8317	10.4742
ENSMUSG00000026568	Mpc2	0.000119027	0.00209118	-0.262284	0.0681589	7.8923	0.0255834	0.00124026	0.00494167	0.00572819	0.00572819	117.032	126.551	136.197	157.657	149.865	176.725
ENSMUSG00000110235	Gm5086	0.000120425	0.00211421	1.58261	0.411574	2.96773	0.940669	0.0700704	0.166523	0.184019	0.184019	1.96492	1.91012	1.45171	0.19247	0.700209	0.338002
ENSMUSG00000039982	Dtx4	0.000122433	0.00214791	0.262137	0.0682434	7.53764	0.0247683	0.000578524	0.00461353	0.00640722	0.00640722	14.0345	13.1194	13.5865	9.55438	11.4593	10.2669
ENSMUSG00000097823	Gm16701	0.000123034	0.00215688	-0.342413	0.0891701	6.51579	0.0437626	0.00138083	0.00935488	0.0105461	0.0105461	20.1605	15.93	15.9226	22.0978	24.2929	24.6422
ENSMUSG00000027376	Prom2	0.000123347	0.00215841	-1.71305	0.446179	4.22795	1.11925	0.0273103	0.271303	0.0562481	0.271303	0.396479	0.593477	0.374726	1.45099	1.8532	5.71581
ENSMUSG00000050989	Selenon	0.000123389	0.00215841	-0.285779	0.0744353	7.15341	0.0257509	0.000811964	0.000750529	0.00749895	0.00749895	19.9716	21.8945	21.4147	27.5434	26.792	28.4181
ENSMUSG00000034116	Vav1	0.000123263	0.00215841	0.902956	0.235173	4.55159	0.310966	0.0134835	0.0694758	0.0438775	0.0694758	2.10243	2.25756	2.17779	0.605956	0.801519	1.31533
ENSMUSG00000033629	Hacd3	0.000123785	0.00216377	-0.223185	0.0581438	8.99069	0.0165603	0.000136788	0.00188416	0.00493427	0.00493427	119.862	129.704	118.735	145.39	155.041	156.098
ENSMUSG00000001016	Ilf2	0.000124265	0.00217059	0.229308	0.0597537	8.57657	0.0168177	0.000325212	0.00097852	0.00503055	0.00503055	146.061	140.3	146.579	109.571	118.965	111.465
ENSMUSG00000061080	Lsamp	0.000125145	0.00218439	-0.259274	0.0675928	8.26788	0.0256494	0.000347546	0.00650563	0.00525665	0.00650563	99.8294	92.0781	104.418	120.358	138.08	120.884
ENSMUSG00000040997	Abhd4	0.00012559	0.00219058	0.295925	0.0771653	6.8987	0.0313145	0.000432394	0.00587137	0.00849933	0.00849933	111.644	93.6998	93.8417	65.0766	73.0466	71.6043
ENSMUSG00000054763	Defb42	0.000125875	0.00219397	-1.46659	0.382482	2.9601	0.722031	0.0339536	0.0620074	0.185485	0.185485	1.43839	0.858984	1.51411	6.98827	5.25769	3.51705
ENSMUSG00000048379	Socs4	0.00012597	0.00219404	0.379012	0.0988501	6.97895	0.0548206	0.000638825	0.0140182	0.00815596	0.0140182	15.7622	18.3912	20.5229	11.1991	13.3511	12.8026
ENSMUSG00000078247	Airn	0.000126507	0.0022018	-0.476065	0.124196	5.71066	0.0865011	0.00407678	0.0190603	0.0184339	0.0190603	26.9706	18.4575	20.6814	36.1786	34.3021	29.7633
ENSMUSG00000107331	Gm42732	0.000126645	0.00220262	-0.299985	0.0782661	6.96021	0.0300594	0.00095469	0.00287279	0.00823368	0.00823368	43.1135	44.6009	42.3334	51.9677	61.1536	58.8988
ENSMUSG00000115263	AC154683.1	0.000126936	0.00220609	0.529457	0.138155	6.04221	0.107002	0.0023379	0.0262925	0.0143633	0.0262925	28.5551	21.7026	21.6916	11.1992	15.7874	14.6464
ENSMUSG00000007659	Bcl2l1	0.000130328	0.00226236	-0.243567	0.0636637	8.06059	0.0188356	0.000591175	0.000706521	0.00548843	0.00548843	86.0373	89.2241	92.5954	113.922	113.118	105.211
ENSMUSG00000025810	Nrp1	0.00013036	0.00226236	0.361343	0.0944496	6.27593	0.0417477	0.00112291	0.00209837	0.0122582	0.0122582	8.99547	9.44909	9.38548	5.98674	6.3669	6.84194
ENSMUSG00000095567	Noc2l	0.000130834	0.00226895	0.322491	0.0843139	7.95973	0.0397307	0.000365339	0.0102979	0.00562631	0.0102979	43.1964	48.095	48.9273	29.8215	32.5608	38.1721
ENSMUSG00000056501	Cebpb	0.000131413	0.00227736	1.06782	0.279257	3.72799	0.352932	0.0294397	-0.0158661	0.0875371	0.0875371	1.90515	2.58303	2.52506	0.777248	0.719858	0.84003
ENSMUSG00000051506	Wdfy4	0.000132924	0.0023019	1.61628	0.423002	3.51479	0.947567	0.161688	0.0431346	0.106708	0.106708	0.732294	0.291647	0.718639	0.162578	0.091766	0.0748415
ENSMUSG00000090223	Pcp4	0.000133559	0.00231123	-0.224997	0.0589029	9.49567	0.0184535	7.23366e-05	0.0040106	0.00513199	0.00513199	1466.17	1223.3	1396.59	1544.03	1591.18	1617.26
ENSMUSG00000039137	Whrn	0.000134989	0.0023343	-0.296616	0.0777057	8.27921	0.0336401	0.00140611	0.00765114	0.00524591	0.00765114	43.7113	43.8898	51.8224	63.1722	66.7949	55.3497
ENSMUSG00000046865	Fbl	0.000136174	0.00235312	0.402202	0.105426	5.97758	0.0597516	0.00162299	0.012404	0.015049	0.015049	41.3998	40.2227	44.1817	23.2505	28.9667	30.6374
ENSMUSG00000042607	Asb4	0.000137577	0.00237514	0.917683	0.240705	4.12235	0.322169	0.0157448	0.0711634	0.0614944	0.0711634	1.48339	3.33304	1.88053	0.769631	0.818938	0.891506
ENSMUSG00000030802	Bckdk	0.000137645	0.00237514	-0.367486	0.0963932	6.31661	0.0473316	0.00199805	0.00652425	0.0119394	0.0119394	28.73	25.2294	24.659	37.2889	33.094	40.0658
ENSMUSG00000003279	Dlgap1	0.000137882	0.00237753	-0.221479	0.0581015	9.10732	0.0184805	0.000114938	0.00459076	0.00494874	0.00494874	114.686	109.657	125.682	145.827	152.442	139.731
ENSMUSG00000034892	Rps29	0.000138392	0.00238463	-0.242834	0.0637187	7.93773	0.021806	0.000431435	0.00471301	0.00565868	0.00565868	613.609	642.212	570.94	716.537	749.198	648.211
ENSMUSG00000114018	Gm36495	0.0001387	0.00238823	-2.48129	0.651175	2.22889	2.14752	0.24022	0.13539	0.395823	0.395823	0.206859	0.0885582	0.486965	2.50047	1.87587	5.33939
ENSMUSG00000013997	Nit1	0.000139262	0.00239621	-0.298574	0.0783767	6.97809	0.0335235	0.00105485	0.0074196	0.0081595	0.0081595	30.2201	35.1697	33.0425	47.2929	43.1489	39.6122
ENSMUSG00000054885	4930578G10Rik	0.000139495	0.00239631	-1.23648	0.324614	3.81316	0.585111	0.0240476	0.134014	0.0810145	0.134014	3.61336	1.63704	2.93865	9.69241	11.9738	5.29951
ENSMUSG00000020440	Arf5	0.000139566	0.00239631	-0.326965	0.0858416	7.90789	0.0409144	0.000559749	0.0104934	0.00570392	0.0104934	125.605	98.0066	100.093	144.757	137.635	145.818
ENSMUSG00000063434	Sorcs3	0.00013938	0.00239631	-0.283956	0.0745435	7.15938	0.0304533	0.000856641	0.00697338	0.00747846	0.00747846	8.01276	8.0693	7.38563	10.6422	11.4113	9.12495
ENSMUSG00000024862	Klc2	0.000139735	0.00239751	-0.251421	0.0660134	7.6707	0.0203465	0.000415158	0.00131324	0.0061215	0.0061215	115.275	108.956	112.755	142.044	129.704	137.249
ENSMUSG00000012428	Steap4	0.000140102	0.0024021	1.96442	0.515869	3.40521	1.47703	0.0768688	0.322313	0.118473	0.322313	1.29649	1.27513	0.910953	0.278517	0.242053	0.0522023
ENSMUSG00000037126	Psd	0.000140711	0.0024093	-0.331293	0.0870241	6.75426	0.0414315	0.00217189	0.00845928	0.0091879	0.0091879	54.7301	48.2212	59.2076	70.6458	78.2062	62.3031
ENSMUSG00000056679	Gpr173	0.000140721	0.0024093	-0.287392	0.0754925	7.26088	0.0257508	0.0014001	-0.000184517	0.00714859	0.00714859	16.1269	16.0857	16.4624	20.455	21.8964	22.0822
ENSMUSG00000023952	Gtpbp2	0.000142394	0.00243621	0.288009	0.0757126	7.58656	0.0317636	0.00100549	0.00759311	0.00629732	0.00759311	134.279	153.021	155.011	117.198	96.4625	103.604
ENSMUSG00000007594	Hapln4	0.000142677	0.00243933	-0.416025	0.10938	5.7938	0.0629409	0.000664986	0.0131074	0.017281	0.017281	45.9022	48.2209	47.5515	61.9979	56.1426	45.8478
ENSMUSG00000005575	Ube2m	0.000144475	0.00246833	-0.257833	0.0678441	7.56757	0.022191	0.000564941	0.00224457	0.0063393	0.0063393	108.886	100.854	104.313	125.141	122.796	136.241
ENSMUSG00000029561	Oasl2	0.000146093	0.0024942	1.63628	0.430869	4.67428	1.026	0.00721962	0.271252	0.040203	0.271252	14.6374	17.0907	16.2656	5.00423	4.37333	1.3674
ENSMUSG00000001305	Rrp15	0.000147396	0.00251467	0.400032	0.105399	6.16996	0.0599564	0.00351343	0.0114225	0.0131499	0.0131499	10.8491	13.5032	10.706	8.01953	8.3864	6.75831
ENSMUSG00000087461	C230014O12Rik	0.00014859	0.00253148	1.60292	0.422553	3.93007	0.985066	0.0324343	0.235392	0.0729317	0.235392	3.26723	2.98154	3.80757	0.441417	0.416901	1.49628
ENSMUSG00000021886	Gpr65	0.00014857	0.00253148	3.11018	0.819883	1.39815	3.28107	0.0991531	0.374723	0.90916	0.90916	0.481152	0.333616	0.598342	0	0.0483881	0
ENSMUSG00000035390	Brsk1	0.000148863	0.00253433	-0.241182	0.0635868	7.94719	0.0190636	0.000420257	0.00159601	0.00564466	0.00564466	79.6423	84.377	78.6063	95.2169	103.467	100.901
ENSMUSG00000021764	Ndufs4	0.000149325	0.00254041	-0.259047	0.0683106	7.59932	0.0243586	0.000729903	0.00455382	0.00626961	0.00626961	188.475	192.63	173.871	204.831	231.149	241.812
ENSMUSG00000093429	Vmn1r-ps145	0.000149672	0.00254453	3.1192	0.822657	1.40265	3.31882	0.109978	0.390024	0.90517	0.90517	4.94359	3.05593	6.78137	0	0.456317	0
ENSMUSG00000007950	Abhd8	0.000152871	0.00259708	-0.233259	0.0616051	8.78294	0.0208771	0.000187316	0.00550546	0.00495368	0.00550546	121.314	104.256	113.049	132.985	150.929	138.145
ENSMUSG00000024420	Zfp521	0.000155159	0.00263411	-0.329698	0.0871604	6.45002	0.03346	0.000418067	0.000644058	0.0109773	0.0109773	44.8672	42.3189	45.38	55.5971	60.2471	53.6433
ENSMUSG00000015755	Tab2	0.000155752	0.00264232	0.249911	0.0660841	7.75388	0.0216204	0.000587755	0.00301698	0.0059629	0.0059629	60.0372	60.7771	64.1011	50.5149	48.2804	44.2721
ENSMUSG00000029106	Add1	0.000156705	0.00265662	-0.233843	0.0618601	8.10361	0.0184361	0.000305262	0.00223379	0.00543475	0.00543475	190.87	183.904	182.364	227.429	218.344	204.368
ENSMUSG00000030605	Mfge8	0.000157467	0.00266766	-0.32911	0.0870895	6.68963	0.0415955	0.000529931	0.0108469	0.00952682	0.0108469	40.3061	42.1475	39.0626	59.9724	62.4203	48.0436
ENSMUSG00000021087	Rtn1	0.000157904	0.0026732	-0.224748	0.059484	9.59992	0.0178171	8.92462e-05	0.00324019	0.00521827	0.00521827	549.621	506.551	520.475	583.431	657.791	658.172
ENSMUSG00000032281	Acsbg1	0.000158265	0.00267743	-0.341568	0.0904162	6.29823	0.0429738	0.000180687	0.0097859	0.0120819	0.0120819	132.984	113.897	124.057	164.144	176.629	134.343
ENSMUSG00000098176	Ccdc166	0.000158744	0.00268365	0.404462	0.107086	6.0061	0.0574715	0.00246097	0.00803222	0.0147402	0.0147402	8.04755	7.20297	8.8337	5.9368	4.85672	5.07735
ENSMUSG00000029482	Aacs	0.000158905	0.0026845	-0.628376	0.166381	4.73402	0.129574	0.00297122	0.0109246	0.0385529	0.0385529	20.2321	22.5267	22.2922	27.6166	38.2747	37.5353
ENSMUSG00000024579	Pcyox1l	0.000159053	0.00268512	-0.408451	0.108156	5.90117	0.051302	0.00162126	-5.58087e-05	0.0159254	0.0159254	14.6661	15.0076	14.7747	21.1657	20.7864	22.5636
ENSMUSG00000017664	Slc35c2	0.000159609	0.00269264	-0.302285	0.0800623	6.82183	0.0320824	0.00076051	0.00507637	0.00885446	0.00885446	49.0947	42.5736	42.4263	54.2005	57.5431	61.4524
ENSMUSG00000029860	Zyx	0.000159878	0.00269342	-0.338309	0.0896135	6.57113	0.0439726	0.00146617	0.0105797	0.0102035	0.0105797	40.7825	36.6149	44.6941	61.782	51.2765	47.9039
ENSMUSG00000064341	mt-Nd1	0.00015979	0.00269342	-0.369493	0.0978701	11.9189	0.041942	7.40131e-06	0.00122316	0.0143604	0.0143604	9012.98	9596.81	8635.16	12715.7	12598	13193.7
ENSMUSG00000021256	Vash1	0.000161372	0.0027167	-0.27642	0.0732649	7.23507	0.0245883	0.000822375	0.00126003	0.00722924	0.00722924	16.2493	16.1365	17.9788	21.1865	22.358	22.0781
ENSMUSG00000026080	Chst10	0.000162122	0.00272742	-0.230176	0.0610267	8.3055	0.0164731	0.000364688	0.000358866	0.00522169	0.00522169	48.9356	49.7751	47.2954	61.3034	61.5701	57.7851
ENSMUSG00000042305	Tmem183a	0.000162855	0.00273785	0.301	0.0798281	6.81267	0.0315137	0.00066034	0.00475647	0.00889844	0.00889844	85.6085	79.2062	84.6149	52.7801	58.4511	63.3947
ENSMUSG00000055027	Smyd1	0.000163017	0.00273867	1.10298	0.292539	4.25268	0.467661	0.0321067	0.096262	0.0551225	0.096262	5.36177	2.72469	2.99281	0.948779	1.08786	1.79021
ENSMUSG00000025939	Ube2w	0.000163515	0.00274145	0.276805	0.0734311	7.28974	0.025973	0.00102728	0.00270615	0.0070609	0.0070609	109.578	113.932	115.869	76.6085	86.7553	87.9802
ENSMUSG00000067285	Gm16223	0.000163523	0.00274145	3.24299	0.860307	1.29704	3.31893	0.10708	0.0977045	1.00311	1.00311	0.385713	0.36363	0.348604	0	0.0202906	0
ENSMUSG00000008658	Rbfox1	0.000163427	0.00274145	-0.228252	0.0605488	8.27111	0.017455	0.000245666	0.00203593	0.00525357	0.00525357	119.867	124.059	130.394	145.862	161.707	156.809
ENSMUSG00000020019	Ntn4	0.000164593	0.00275748	-0.392087	0.104058	6.74422	0.0591134	0.00076597	0.0154762	0.00923926	0.0154762	15.1756	12.2801	16.2935	19.4889	20.783	23.7609
ENSMUSG00000101942	Gm19582	0.000165923	0.00277783	-1.43073	0.379912	3.64006	0.787293	0.0409558	0.175544	0.0949115	0.175544	0.512356	1.15868	1.73652	4.34811	3.08559	5.26002
ENSMUSG00000020594	Pum2	0.000166968	0.00279291	0.222722	0.0591658	8.50013	0.0186319	0.000177009	0.00451089	0.00507388	0.00507388	121.74	120.876	134.991	102.363	104.944	92.6731
ENSMUSG00000107002	0610012G03Rik	0.000167055	0.00279291	-0.323409	0.085916	6.62493	0.0389755	0.00118533	0.00831161	0.009887	0.009887	21.1185	21.5902	19.7676	25.4514	26.648	32.6296
ENSMUSG00000063015	Ccni	0.000167679	0.00280141	-0.245783	0.0653104	7.67293	0.0200056	0.000281109	0.00207228	0.00611707	0.00611707	244.701	224.162	235.407	277.697	305.413	271.509
ENSMUSG00000039357	Fut11	0.000168132	0.00280704	-0.281781	0.0748893	7.14355	0.0298267	0.000879552	0.00662858	0.00753306	0.00753306	12.5239	12.6131	13.5076	17.8638	18.4804	15.0279
ENSMUSG00000003644	Rps6ka1	0.000168691	0.00281249	-0.277276	0.0737082	8.52377	0.0295841	0.00126648	0.00688287	0.00505961	0.00688287	80.8053	64.1427	74.5679	94.0756	91.5162	100.947
ENSMUSG00000089817	Gm7162	0.000168662	0.00281249	-0.736934	0.195897	4.77565	0.208972	0.0087076	0.0488557	0.0374481	0.0488557	2.83225	4.52363	4.79246	9.59881	7.57395	6.84225
ENSMUSG00000019943	Atp2b1	0.000169322	0.00282106	0.228323	0.06071	8.83111	0.0200622	0.000217862	0.0053107	0.00494403	0.0053107	260.101	273.725	302.755	204.202	224.051	231.984
ENSMUSG00000025977	Boll	0.000169767	0.00282653	2.91043	0.774007	1.8685	3.10568	0.327994	0.377623	0.570635	0.570635	1.66021	1.50076	5.23672	0.203316	0.145701	0
ENSMUSG00000026104	Stat1	0.000170182	0.00283148	0.533213	0.141827	7.54561	0.109433	0.00199543	0.0281769	0.0063889	0.0281769	32.4231	45.5421	46.6992	24.5112	27.123	21.1003
ENSMUSG00000026414	Tnnt2	0.00017067	0.00283766	1.73685	0.462065	2.99858	1.04669	0.142039	0.0350834	0.178217	0.178217	2.43465	2.2841	1.18207	0.184089	0.46426	0.306747
ENSMUSG00000056260	Lrif1	0.000170957	0.00284047	0.339261	0.0902657	6.63272	0.0443068	0.00157386	0.010648	0.0098425	0.010648	52.679	43.9332	49.4225	28.6813	36.1537	33.7231
ENSMUSG00000076617	Ighm	0.000171084	0.00284062	0.586731	0.156117	5.05808	0.10875	0.00588051	0.000961531	0.0306782	0.0306782	6.07007	5.33628	5.52837	3.40242	2.81447	3.10937
ENSMUSG00000029710	Ephb4	0.000172417	0.0028608	0.417644	0.111184	5.8868	0.0580327	0.00244458	0.00468623	0.0160982	0.0160982	3.89957	4.5385	3.91421	2.70346	2.92479	2.4597
ENSMUSG00000004151	Etv1	0.00017257	0.00286137	-0.304969	0.0811926	9.14081	0.0358125	6.59689e-05	0.00982238	0.00495629	0.00982238	169.233	198.69	213.64	241.847	277.109	260.453
ENSMUSG00000046223	Plaur	0.000172869	0.00286436	1.22508	0.326194	3.3624	0.494614	0.0361161	0.0193422	0.123488	0.123488	2.54881	2.1615	1.36885	0.555087	0.664151	0.54078
ENSMUSG00000048040	Arxes2	0.000173032	0.00286509	-0.227244	0.0605106	8.30975	0.0177615	0.000274418	0.00256247	0.00521787	0.00521787	122.687	128.299	125.865	144.488	159.202	163.164
ENSMUSG00000035200	Chrnb4	0.000173525	0.00287129	-1.05637	0.281345	3.72379	0.429764	0.0246338	0.0940984	0.0878741	0.0940984	0.349245	0.30398	0.139408	0.710336	0.661124	0.774324
ENSMUSG00000074340	Ovgp1	0.000173946	0.0028763	0.472966	0.125986	5.61931	0.0738703	0.00400125	0.00445018	0.0198073	0.0198073	20.4529	17.5169	17.8862	10.0416	11.2962	12.2575
ENSMUSG00000034520	Gjc1	0.000174672	0.00288554	0.401215	0.106903	6.07795	0.0565755	0.00313682	0.00721755	0.0140055	0.0140055	11.9857	11.6669	14.8673	8.05476	8.4395	8.81415
ENSMUSG00000021061	Sptb	0.000174744	0.00288554	-0.357647	0.0952968	9.42963	0.0492712	0.00028389	0.0133383	0.00508571	0.0133383	44.7236	42.1829	48.4706	64.9047	73.8669	54.8431
ENSMUSG00000035246	Pcyt1b	0.000175709	0.0028995	-0.267925	0.0714161	7.34596	0.0238531	0.000752957	0.00214453	0.00689744	0.00689744	10.6542	10.6255	11.1876	15.1883	14.0885	13.1053
ENSMUSG00000007987	Ift22	0.0001762	0.00290562	-0.431773	0.115112	6.10835	0.0718293	0.00384348	0.0160326	0.0137127	0.0160326	34.9367	44.4656	35.2039	53.3489	48.2587	62.8636
ENSMUSG00000032998	Foxj3	0.000176788	0.00291333	0.336124	0.0896315	7.33736	0.0435344	0.00186673	0.010184	0.00692181	0.010184	63.7898	59.1301	72.3012	39.7831	50.3468	38.4786
ENSMUSG00000010609	Psen2	0.000177242	0.00291882	-0.403827	0.107704	6.52873	0.0615654	0.00693578	0.00886729	0.0104644	0.0104644	14.6595	17.6742	16.1692	22.9559	20.5407	27.5321
ENSMUSG00000060512	0610040J01Rik	0.000177648	0.00292351	-0.578618	0.154346	4.99135	0.101929	0.00354646	-0.00168502	0.0321874	0.0321874	7.32097	7.07903	7.05539	11.7898	12.5877	12.0713
ENSMUSG00000086308	G630016G05Rik	0.000178024	0.0029277	1.73966	0.464118	3.10127	0.960096	0.162847	-0.0976349	0.16026	0.16026	1.19583	1.49125	1.16883	0.292192	0.226901	0.143933
ENSMUSG00000039615	Stub1	0.000178289	0.00293008	-0.232018	0.0619055	8.16012	0.020268	0.000379707	0.00476808	0.00536873	0.00536873	80.9296	77.0745	71.1457	89.2075	91.4515	102.652
ENSMUSG00000089661	Mia	0.000179777	0.00295252	-0.666807	0.178012	4.81222	0.169458	0.0110269	0.034059	0.0365053	0.0365053	13.6258	12.029	7.79761	18.5353	18.5634	21.491
ENSMUSG00000033938	Ndufb7	0.000181576	0.00298005	-0.231244	0.0617744	9.26275	0.0194247	0.000727386	0.00350089	0.00499673	0.00499673	151.767	137.766	134.121	174.721	166.098	188.736
ENSMUSG00000005469	Prkaca	0.000182002	0.00298501	-0.224166	0.059893	8.55961	0.0164528	0.000341303	0.00138082	0.00503946	0.00503946	106.686	108.06	97.898	129.897	131.898	124.543
ENSMUSG00000044006	Cilp2	0.000182797	0.00299601	-1.30121	0.34776	3.43479	0.653065	0.0458764	0.135529	0.115152	0.135529	0.131676	0.0743719	0.210634	0.618777	0.332133	0.531554
ENSMUSG00000031539	Ap3m2	0.000183315	0.00300162	-0.233374	0.0623834	8.00447	0.0184683	0.000274491	0.00238709	0.00556305	0.00556305	49.5514	47.993	43.0532	57.8582	59.5574	58.1337
ENSMUSG00000049521	Cdc42ep1	0.000183387	0.00300162	-0.310878	0.0831032	7.66518	0.0372809	0.000549929	0.00980929	0.00613256	0.00980929	23.1804	23.0601	27.2443	34.3177	35.9344	29.2318
ENSMUSG00000084842	Pabpc1l2b-ps	0.000183772	0.00300588	0.517244	0.138288	6.02722	0.103211	0.00287584	0.0258095	0.0145179	0.0258095	43.5279	45.2423	47.8853	19.8059	27.8183	31.7668
ENSMUSG00000104186	Gm37819	0.000184625	0.0030172	1.34541	0.359816	3.2427	0.582849	0.0552808	-0.00552115	0.13892	0.13892	2.39983	2.13713	2.36351	0.435335	0.803261	0.499875
ENSMUSG00000032854	Ugt8a	0.000184794	0.0030172	-0.502295	0.134341	9.26967	0.0973472	9.25925e-05	0.0269788	0.00499964	0.0269788	88.9536	139.888	117.164	185.646	181.374	199.047
ENSMUSG00000030871	Ears2	0.000184839	0.0030172	0.412723	0.110387	5.92706	0.0642972	0.00265746	0.0138365	0.0156203	0.0156203	5.26332	5.62759	6.42442	3.52021	4.39633	3.41737
ENSMUSG00000038170	Pde4dip	0.000185188	0.00302086	0.414575	0.110896	8.79369	0.0663193	0.000261512	0.0181854	0.00495126	0.0181854	77.2529	83.6638	99.7017	57.418	64.6616	49.0887
ENSMUSG00000022636	Alcam	0.000185834	0.00302936	0.381371	0.102038	7.31371	0.0561273	0.0014323	0.0141854	0.00699005	0.0141854	51.2421	64.0925	66.1441	37.7427	45.1977	39.7892
ENSMUSG00000031971	Ccsap	0.000187333	0.00305174	-0.305968	0.0819079	7.13252	0.0361356	0.000763261	0.00930009	0.00757163	0.00930009	18.6088	15.841	17.8656	24.5251	25.6497	20.5383
ENSMUSG00000030357	Fkbp4	0.000188122	0.00306253	-0.224881	0.0602179	8.89965	0.0193752	0.000503635	0.00475102	0.00493566	0.00493566	158.539	178.825	193.378	221.785	217.649	207.856
ENSMUSG00000003345	Csnk1g2	0.000188832	0.00307201	-0.333167	0.0892369	6.41795	0.040398	0.000747296	0.00812526	0.0111975	0.0111975	68.9823	71.7444	58.8199	76.7813	75.2075	92.3817
ENSMUSG00000015474	Ppt2	0.000189215	0.00307618	-0.257416	0.0689568	7.49404	0.0212386	0.000622433	0.00107732	0.00651013	0.00651013	55.123	55.2747	53.7493	66.8218	67.4869	73.4413
ENSMUSG00000045822	Zswim3	0.000189949	0.00308588	-0.42381	0.11356	5.84198	0.0598443	0.00268956	0.00476022	0.0166544	0.0166544	3.62073	4.44945	4.36198	6.09473	6.06248	6.54589
ENSMUSG00000049878	Rlf	0.000190323	0.00308588	0.251537	0.0674085	7.7364	0.0244339	0.000536792	0.00627907	0.00599509	0.00627907	26.1956	24.6594	27.1748	19.1483	22.5917	19.0157
ENSMUSG00000025893	Kbtbd3	0.000190223	0.00308588	-0.357266	0.0957391	6.35379	0.0415513	0.00209009	0.00198445	0.0116589	0.0116589	12.0921	10.9892	11.3239	16.7673	14.9357	17.7092
ENSMUSG00000014606	Slc25a11	0.000190157	0.00308588	-0.279612	0.0749279	7.03327	0.0271649	0.000482461	0.0041551	0.00793883	0.00793883	81.5116	72.0867	69.5263	96.9115	93.0069	97.8618
ENSMUSG00000038418	Egr1	0.000190466	0.00308614	0.704165	0.188717	8.02001	0.191491	0.000431927	0.052989	0.00554187	0.052989	52.8587	34.7379	41.6696	15.8928	22.3418	25.5133
ENSMUSG00000030739	Myh14	0.000190924	0.00309148	-0.34294	0.0919229	8.34257	0.0454221	0.00103936	0.0116354	0.0051893	0.0116354	34.6545	26.9288	29.7572	38.6144	46.4143	41.8648
ENSMUSG00000086480	Gm15287	0.000191865	0.00310464	1.32676	0.355749	3.27872	0.625384	0.0557919	0.0658245	0.134044	0.134044	4.25613	3.97997	3.41799	1.08744	1.4222	0.530617
ENSMUSG00000029524	Sirt4	0.000192104	0.00310643	-0.341552	0.091589	6.56678	0.0450477	0.00235304	0.01021	0.0102298	0.0102298	42.3045	48.3654	36.9173	54.7801	53.8	61.8742
ENSMUSG00000039100	March6	0.000192644	0.00311308	0.226791	0.0608268	8.07717	0.019365	8.247e-05	0.004836	0.00546738	0.00546738	117.405	110.677	122.249	90.7173	100.602	85.8462
ENSMUSG00000109006	B230209E15Rik	0.000192793	0.0031134	1.67461	0.449166	4.26261	1.0834	0.0182211	0.284404	0.0546805	0.284404	12.3278	11.9318	6.59132	1.16963	1.20655	4.01118
ENSMUSG00000032558	Nphp3	0.000193624	0.00312474	0.658013	0.176544	6.30183	0.145266	0.0346978	-0.0154831	0.0120538	0.0120538	13.3348	10.5037	10.924	5.47455	5.33999	7.01639
ENSMUSG00000069114	Zbtb10	0.000194984	0.00314458	0.307976	0.0826686	7.08778	0.0366557	0.000876103	0.00937505	0.0077326	0.00937505	8.04788	8.44447	10.1731	6.15046	6.46544	6.96382
ENSMUSG00000026365	Cfh	0.000195699	0.00315313	0.2471	0.0663444	7.7123	0.0235994	0.00047486	0.00612751	0.00604043	0.00612751	28.9246	27.5884	32.0536	25.1911	23.5346	21.7738
ENSMUSG00000054162	Spock3	0.000195775	0.00315313	-0.26062	0.0699764	8.615	0.0262529	0.000168023	0.00717701	0.00501183	0.00717701	97.8849	92.3849	88.5923	109.065	117.296	133.74
ENSMUSG00000034154	Ino80	0.000197003	0.0031708	0.313267	0.0841477	7.26882	0.0379379	0.000390585	0.0102307	0.00712421	0.0102307	19.0687	17.7758	20.7189	13.673	15.9374	12.7114
ENSMUSG00000071074	Yipf3	0.000198367	0.00319064	-0.3155	0.0847872	6.80114	0.0306224	0.00182893	-0.000878645	0.00895436	0.00895436	48.804	48.1609	48.1087	64.5026	61.2106	58.9626
ENSMUSG00000093803	Ppp2r3d	0.000198791	0.00319533	-0.364071	0.0978543	6.36494	0.0431713	0.00278653	0.00147206	0.0115767	0.0115767	69.3349	66.5307	77.7118	89.3462	90.6387	83.3788
ENSMUSG00000004552	Ctse	0.000199992	0.00321182	2.87537	0.77315	1.46267	3.13331	0.0430744	0.773166	0.853567	0.853567	0.344821	0.384022	0.567638	0	0.0945481	0
ENSMUSG00000062729	Ppox	0.000200083	0.00321182	-0.369006	0.0992242	6.39436	0.0478255	0.00340428	0.00531555	0.0113639	0.0113639	24.6681	22.6214	25.0753	30.3141	32.2321	38.0839
ENSMUSG00000103713	Gm2136	0.000203705	0.00326779	0.851733	0.229307	4.13863	0.258193	0.018237	0.0324608	0.0606357	0.0606357	2.1341	2.00473	1.22173	0.705618	0.826492	0.66658
ENSMUSG00000051154	Commd3	0.000203908	0.00326889	0.325757	0.0877077	7.11334	0.0410665	0.00051667	0.0110223	0.00763974	0.0110223	203.948	197.471	177.8	142.977	128.554	164.661
ENSMUSG00000036779	Tent4b	0.000204165	0.00327084	0.241193	0.0649449	7.98283	0.0219194	0.000733538	0.00485044	0.00559323	0.00559323	33.0388	31.4592	37.01	28.1991	26.8047	25.3336
ENSMUSG00000022956	Atp5o	0.000204421	0.00327277	-0.22246	0.0599058	8.29978	0.0158871	0.000156187	0.00114463	0.00522687	0.00522687	398.056	406.347	379.97	450.076	470.189	470.572
ENSMUSG00000039678	Tbc1d13	0.000204794	0.00327656	-0.473518	0.127529	5.45612	0.0835602	0.0018494	0.0185187	0.022546	0.022546	37.9643	27.6067	33.7522	47.1692	38.9109	38.5024
ENSMUSG00000056888	Glipr1	0.000205062	0.00327868	2.3372	0.629514	2.3156	2.10716	0.232346	0.353168	0.362087	0.362087	5.97819	5.65719	7.74134	0.243701	1.88868	0.191188
ENSMUSG00000054519	Zfp867	0.00020652	0.00329982	0.340856	0.0918525	6.71469	0.0449791	0.00109137	0.011564	0.00939301	0.011564	12.6018	13.0864	14.3874	8.06661	10.0622	10.3007
ENSMUSG00000096472	Cdkn2d	0.000206757	0.00330142	-0.29512	0.0795341	6.90749	0.0282479	0.00102818	0.00162075	0.00846033	0.00846033	32.5336	30.0065	28.8425	38.7058	41.4746	39.8797
ENSMUSG00000037849	Ifi206	0.000207784	0.00331563	2.66305	0.717928	1.73851	2.55175	0.123229	0.407016	0.649901	0.649901	0.508181	0.423892	0.903325	0.0565057	0.0581172	0
ENSMUSG00000036989	Trim3	0.000208069	0.00331799	-0.218257	0.0588449	8.68136	0.0179307	0.000209811	0.00434013	0.00498428	0.00498428	245.05	226.541	234.958	278.67	260.968	308.906
ENSMUSG00000025270	Alas2	0.000208434	0.00332162	0.647606	0.174624	6.40147	0.162411	0.00154186	0.0441986	0.0113134	0.0441986	32.0705	24.6402	38.6928	19.7622	13.1758	15.8298
ENSMUSG00000037710	Cisd1	0.00020884	0.00332589	-0.243421	0.0656462	7.70106	0.0223646	0.000402162	0.00533339	0.00606198	0.00606198	89.0811	107.207	100.23	115.412	121.349	133.137
ENSMUSG00000015950	Ncf1	0.000209307	0.00333114	0.777051	0.209588	4.63064	0.233855	0.00789886	0.057992	0.0414626	0.057992	5.58118	4.22306	3.68242	2.01278	2.70052	1.72301
ENSMUSG00000029328	Hnrnpdl	0.000210612	0.0033497	-0.241743	0.0652312	8.7861	0.022638	0.000195494	0.00618717	0.00495295	0.00618717	158.27	183.403	171.883	225.742	194.665	233.868
ENSMUSG00000030220	Arhgdib	0.000212051	0.00337037	0.597525	0.16131	5.02109	0.130057	0.00752189	0.0211602	0.0315094	0.0315094	12.4355	12.4712	13.8011	5.51011	8.72308	5.95931
ENSMUSG00000045672	Col27a1	0.000212949	0.00338243	-0.864989	0.233583	6.18421	0.289935	0.00311483	0.0787265	0.0130246	0.0787265	2.7193	2.68407	1.70822	5.51839	3.96187	7.02452
ENSMUSG00000024695	Zfp91	0.000213455	0.00338823	0.237914	0.064257	8.92724	0.0219357	8.26672e-05	0.00611078	0.00493406	0.00611078	96.4554	97.4268	111.898	77.466	85.4609	77.3674
ENSMUSG00000074052	BC048644	0.00021433	0.00339988	1.06857	0.288685	3.66382	0.399709	0.0321587	0.0392875	0.0928501	0.0928501	0.847162	1.10785	0.927587	0.35419	0.431898	0.214593
ENSMUSG00000030382	Slc27a5	0.000215175	0.00341106	1.2178	0.32909	3.23149	0.500886	0.021969	0.0480032	0.140481	0.140481	2.07346	3.60011	1.82847	0.738017	0.604696	0.666765
ENSMUSG00000037001	Zfp39	0.000215563	0.00341497	0.349804	0.0945405	6.35611	0.0397616	0.00176518	0.00205076	0.0116417	0.0116417	8.33857	7.10893	7.83776	5.27871	5.56898	5.50298
ENSMUSG00000038255	Neurod2	0.000216971	0.00343502	-0.42226	0.114174	8.17255	0.0691338	0.000293041	0.0192605	0.00535489	0.0192605	34.4832	28.3461	41.0876	48.4864	55.9374	50.8523
ENSMUSG00000047996	Prrg1	0.000218957	0.0034642	-0.380537	0.102957	6.18184	0.0478226	0.00285488	0.00262031	0.0130453	0.0130453	7.61907	7.89763	7.10852	11.0473	10.2103	11.6757
ENSMUSG00000079330	Lemd1	0.000219266	0.00346455	-0.670049	0.181304	4.73823	0.158468	0.0108673	0.0188554	0.0384395	0.0384395	4.6485	6.18284	4.26329	10.5639	9.6425	7.94888
ENSMUSG00000031349	Nsdhl	0.000219262	0.00346455	-0.451794	0.122248	6.11075	0.0791688	0.00161729	0.0207995	0.0136901	0.0207995	11.6904	13.0204	8.75122	16.9188	17.8793	16.1293
ENSMUSG00000022231	Sema5a	0.000219487	0.00346577	-0.303035	0.0820019	6.73814	0.0356182	0.000508225	0.00957824	0.00927055	0.00957824	8.29349	9.94288	10.3917	13.1067	13.4989	11.7606
ENSMUSG00000021596	Mctp1	0.000223684	0.00352975	-0.281646	0.0763134	7.25049	0.0307858	0.00050105	0.00823456	0.0071808	0.00823456	35.6771	32.0948	40.514	46.1536	44.3995	47.5491
ENSMUSG00000032590	Apeh	0.000225292	0.00355047	-0.575908	0.156122	5.97983	0.12875	0.00324707	0.0333142	0.0150243	0.0333142	18.7336	18.5363	17.5449	25.5254	28.2923	41.5651
ENSMUSG00000036790	Slitrk2	0.000225289	0.00355047	0.317366	0.0860343	7.45328	0.0390986	0.000954465	0.0101484	0.00661078	0.0101484	18.0405	16.02	20.4514	13.2594	14.1587	12.3029
ENSMUSG00000028796	Phc2	0.000225554	0.00355229	-0.251579	0.0682057	7.46578	0.0244623	0.000398577	0.00644481	0.00657945	0.00657945	88.7296	75.3167	79.0724	94.2413	104.513	100.823
ENSMUSG00000057766	Ankrd29	0.000226058	0.00355791	-0.334442	0.0906847	6.59903	0.04179	0.00229818	0.00799509	0.0100374	0.0100374	22.6935	30.0531	26.9474	36.9088	34.8401	36.7883
ENSMUSG00000087408	Cers1	0.000228369	0.00359194	-0.283277	0.0768653	7.54429	0.0311637	0.000822249	0.00804016	0.00639193	0.00804016	22.3747	19.6167	24.1899	26.521	30.5055	30.0495
ENSMUSG00000018012	Rac3	0.000229205	0.00360274	-0.455379	0.123595	5.86272	0.0805418	0.00390176	0.0190118	0.0163939	0.0190118	22.4996	25.3543	17.2847	28.9435	35.1457	32.5444
ENSMUSG00000000168	Dlat	0.000230133	0.00361499	-0.303463	0.0823864	6.74331	0.0304024	0.000937375	0.00253196	0.0092439	0.0092439	78.8957	84.7422	77.4091	105.694	96.4319	106.989
ENSMUSG00000071112	Spx	0.000230666	0.00362101	0.637733	0.173164	5.60211	0.150476	0.0249001	0.0106814	0.0200787	0.0200787	9.11651	13.6037	14.6546	6.53481	5.80721	6.79255
ENSMUSG00000044676	Zfp612	0.000231125	0.00362586	-0.315872	0.0857808	7.75244	0.0387625	0.000368079	0.0106694	0.00596553	0.0106694	23.4653	30.2368	30.3017	37.81	37.2662	39.2084
ENSMUSG00000067150	Xpo5	0.000232306	0.00364202	0.237911	0.064632	7.75717	0.0180358	0.000309022	0.00101002	0.00595692	0.00595692	31.2502	32.7299	32.353	25.8145	25.4903	23.5974
ENSMUSG00000012535	Tnpo3	0.000232883	0.00364725	0.238617	0.0648348	7.96539	0.0199516	0.000687216	0.00290052	0.00561812	0.00561812	51.2554	54.4333	57.502	44.03	43.8854	40.3184
ENSMUSG00000041515	Irf8	0.000232941	0.00364725	1.20918	0.328554	4.0435	0.568173	0.0156712	0.14625	0.0659227	0.14625	4.17917	4.06876	2.31387	1.1534	1.44283	0.703728
ENSMUSG00000084792	1700056N10Rik	0.000233703	0.00365682	0.784547	0.213222	4.43579	0.23921	0.0126087	0.0555866	0.0477837	0.0555866	5.69713	6.17468	7.50793	3.52287	3.34628	1.892
ENSMUSG00000026536	Ifi211	0.00023387	0.00365705	1.34056	0.364352	3.23837	0.682262	0.0596084	0.119302	0.139521	0.139521	1.87081	1.98876	0.839312	0.495736	0.417776	0.236901
ENSMUSG00000045091	Aqp12	0.000237154	0.00370601	3.07529	0.836643	1.3807	3.18545	0.125194	0.310094	0.924763	0.924763	0.759386	0.641005	0.722825	0	0.0764695	0
ENSMUSG00000025020	Slit1	0.000237733	0.00371266	1.1574	0.314928	5.31279	0.520888	0.0575729	0.0911966	0.0252573	0.0911966	4.10237	2.98204	1.87031	0.788021	1.40262	0.865257
ENSMUSG00000041609	Bicdl1	0.000239721	0.00374129	-0.251373	0.0684381	7.7225	0.0226848	0.00100457	0.0036557	0.0060211	0.0060211	63.0496	60.8517	67.794	77.049	76.2716	89.06
ENSMUSG00000009633	G0s2	0.000241138	0.00376097	0.558203	0.152037	5.16372	0.0975586	0.00630694	-0.0012049	0.0283659	0.0283659	13.7196	15.3157	13.334	7.27348	8.3876	7.2444
ENSMUSG00000029307	Dmp1	0.000244168	0.00380333	-0.481331	0.131214	5.55408	0.0901644	0.00389341	0.0219322	0.0208577	0.0219322	2.2146	3.35661	3.0299	4.82774	4.22579	4.431
ENSMUSG00000096210	H1f0	0.000244128	0.00380333	0.213019	0.0580695	9.17359	0.0163356	9.29524e-05	0.00331019	0.00496516	0.00496516	229.648	197.195	212.261	162.656	172.939	168.127
ENSMUSG00000022450	Ndufa6	0.000245406	0.00382015	-0.279666	0.0762655	6.99996	0.0272239	0.000654079	0.00404589	0.00807056	0.00807056	242.4	215.047	204.916	278.454	252.75	260.823
ENSMUSG00000003154	Foxj2	0.00024632	0.0038319	0.24952	0.0680622	7.9045	0.0238379	0.00123953	0.00521032	0.00570917	0.00570917	21.2047	24.459	26.403	18.3013	19.021	18.1523
ENSMUSG00000035242	Oaz1	0.00024824	0.0038593	-0.218571	0.0596526	8.62982	0.0155469	0.00033249	0.00118611	0.00500516	0.00500516	399.83	377.293	360.58	436.051	439.779	432.853
ENSMUSG00000034459	Ifit1	0.000249262	0.00387269	1.27749	0.348754	5.58723	0.63555	0.00456977	0.177874	0.0203166	0.177874	7.54522	10.1363	9.79511	3.0988	3.89044	1.2902
ENSMUSG00000067925	Rtl8a	0.000250164	0.00388421	-0.288891	0.0788868	8.13689	0.0325051	0.000345319	0.00898938	0.00539525	0.00898938	109.28	103.68	85.6559	121.275	130.714	132.63
ENSMUSG00000043673	Kcns3	0.000250446	0.00388609	0.687528	0.187757	4.60072	0.180832	0.0105234	0.0382558	0.0423553	0.0423553	2.89812	2.84753	2.14326	1.72162	1.2661	1.01088
ENSMUSG00000079070	Gm3985	0.000250813	0.00388929	1.86895	0.510443	2.58705	1.35761	0.117399	0.269754	0.273429	0.273429	1.78655	1.79538	0.595818	0.0756546	0.251555	0.265943
ENSMUSG00000026883	Dab2ip	0.000251163	0.00389055	-0.427511	0.116772	9.33817	0.0711927	0.000205163	0.0202485	0.00503206	0.0202485	49.2596	44.3096	60.5307	80.487	86.2596	67.8788
ENSMUSG00000038055	Dexi	0.000251216	0.00389055	-0.279703	0.0764002	7.2069	0.0298523	0.00143575	0.00654206	0.00731975	0.00731975	37.7418	36.8473	30.3752	43.479	47.5265	44.161
ENSMUSG00000041120	Nbl1	0.000251687	0.00389441	0.896066	0.244791	6.25634	0.312787	0.00086192	0.0890218	0.0124162	0.0890218	84.0036	56.3221	56.5394	35.3834	34.2534	22.9178
ENSMUSG00000022463	Srebf2	0.000251788	0.00389441	-0.24408	0.0666807	7.7784	0.0231349	0.000750748	0.00582712	0.00591873	0.00591873	42.3283	42.8975	44.9569	60.4917	56.1913	48.7494
ENSMUSG00000056144	Trim34a	0.000253161	0.00391315	0.891388	0.243612	5.03788	0.309588	0.00894859	0.0800719	0.0311305	0.0800719	3.75532	4.69881	4.08108	1.06949	2.30386	1.93698
ENSMUSG00000071203	Naip5	0.000255584	0.00394808	0.926975	0.253507	4.14505	0.334904	0.0222737	0.0741254	0.0603023	0.0741254	0.889537	0.844123	0.702608	0.215981	0.497925	0.292418
ENSMUSG00000094825	Gm3194	0.000256323	0.00395696	0.814349	0.222752	4.54443	0.258491	0.0154156	0.059012	0.0441057	0.059012	6.03861	6.1793	6.55647	3.63399	3.12635	1.73829
ENSMUSG00000039478	Micu3	0.00025683	0.00396225	-0.212317	0.058084	8.94661	0.0145029	0.000127072	0.00109704	0.00493355	0.00493355	158.557	160.144	163.421	190.539	202.208	204.327
ENSMUSG00000040028	Elavl1	0.000257538	0.00396307	0.232613	0.0636487	7.87666	0.0207254	0.000323789	0.0052921	0.00575295	0.00575295	35.7662	38.9656	41.8355	30.8036	32.5302	28.9043
ENSMUSG00000024696	Lpxn	0.000257425	0.00396307	1.06708	0.29197	3.58905	0.433552	0.02835	0.0865925	0.0995197	0.0995197	2.28687	1.21794	1.51976	0.431468	0.442753	0.832798
ENSMUSG00000031153	Gripap1	0.000257222	0.00396307	0.264536	0.0723774	8.04349	0.02728	0.00077089	0.00708683	0.00551062	0.00708683	98.1916	76.0835	83.2934	63.8379	64.653	65.4503
ENSMUSG00000031337	Mtm1	0.000257437	0.00396307	0.288578	0.0789598	6.98953	0.0309887	0.00123922	0.00626773	0.00811275	0.00811275	19.2967	20.7482	20.2042	13.729	14.6564	17.3093
ENSMUSG00000002324	Rec8	0.00025908	0.00398426	-0.482724	0.132141	6.37962	0.0908602	0.00129567	0.024896	0.0114697	0.024896	33.1203	29.7458	27.0365	48.5194	37.0813	53.6247
ENSMUSG00000037625	Cldn11	0.000259444	0.00398732	-0.296348	0.08113	9.08966	0.0342451	0.000121766	0.00975135	0.00494537	0.00975135	198.642	186.794	154.557	247.522	223.777	244.185
ENSMUSG00000030590	Fam98c	0.000260254	0.00399722	-0.329639	0.0902639	6.5246	0.0414088	0.00173094	0.0092818	0.0104904	0.0104904	23.5825	22.7208	18.7019	27.2937	26.8107	32.063
ENSMUSG00000109953	5430430B14Rik	0.000261119	0.00400797	3.48638	0.954885	2.74923	4.74063	0.107727	1.25998	0.230991	1.25998	1.11165	3.50066	4.31566	0.137832	0.202451	0
ENSMUSG00000062070	Pgk1	0.000262526	0.00402701	-0.215621	0.0590788	9.38672	0.017131	0.000176414	0.00380268	0.00505905	0.00505905	280.79	286.844	266.118	317.895	331.871	370.072
ENSMUSG00000026185	Igfbp5	0.000263196	0.00403473	-0.254275	0.0696822	9.01499	0.0252234	9.34165e-05	0.00718999	0.00493577	0.00718999	50.3313	54.3428	53.7237	67.8627	75.1968	60.1425
ENSMUSG00000028551	Cdkn2c	0.000267721	0.0040989	0.524614	0.143939	5.45495	0.0901335	0.00851082	0.000948698	0.022567	0.022567	6.72629	7.96047	7.58991	3.9707	4.22314	4.88472
ENSMUSG00000052085	Dock8	0.00026758	0.0040989	0.582424	0.159795	5.01667	0.119377	0.00669217	0.0153225	0.0316095	0.0316095	0.859809	1.21553	0.929715	0.494617	0.549819	0.617321
ENSMUSG00000074743	Thbd	0.000268357	0.00410604	0.301928	0.0828544	6.78501	0.0346521	0.00126365	0.00786643	0.00903363	0.00903363	9.93585	12.1575	10.9923	8.62209	8.49523	7.2877
ENSMUSG00000032058	Ppp2r1b	0.000268539	0.00410622	-0.286183	0.0785375	7.08715	0.025756	0.0015173	-3.49571e-05	0.00773492	0.00773492	24.2526	24.4329	27.0307	34.2017	33.8391	32.6806
ENSMUSG00000002769	Gnmt	0.00026905	0.00411143	0.54867	0.150593	5.1689	0.110926	0.00576259	0.0200057	0.0282546	0.0282546	15.1664	11.008	13.828	7.74794	8.44524	6.30635
ENSMUSG00000022096	Hr	0.000269371	0.00411374	-0.466823	0.128139	8.52276	0.0850807	0.00202363	0.0226057	0.0050602	0.0226057	20.8776	27.1205	24.7998	39.0514	45.3795	31.5743
ENSMUSG00000027834	Serpini1	0.000275134	0.0041991	-0.218604	0.0600947	8.24021	0.0164139	0.000133315	0.0024637	0.00528374	0.00528374	109.084	99.6531	97.6921	121.703	133.696	124.52
ENSMUSG00000108137	Gm44053	0.000275911	0.0042083	0.51431	0.141413	5.34264	0.0856971	0.00532752	0.00260077	0.0246691	0.0246691	18.6669	20.4273	23.2551	11.5209	11.7588	12.3162
ENSMUSG00000046985	Tapt1	0.000276293	0.00421146	-0.29001	0.0797482	6.82795	0.0292557	0.00071443	0.00431556	0.00882523	0.00882523	78.3092	67.2922	71.3839	91.1611	82.3546	93.5333
ENSMUSG00000037111	Setd7	0.000277017	0.00421984	-0.499501	0.13738	8.25646	0.0974983	0.000213463	0.0280966	0.00526769	0.0280966	67.4048	67.911	88.7127	121.79	143.088	102.482
ENSMUSG00000029156	Sgcb	0.000277484	0.00422344	-0.239695	0.0659326	7.63458	0.0183244	0.000325668	0.00103459	0.006195	0.006195	40.0438	43.1123	42.5154	51.7741	52.0203	54.4144
ENSMUSG00000047407	Tgif1	0.000277603	0.00422344	0.713714	0.196326	4.50796	0.157964	0.0125225	-0.00608758	0.0452935	0.0452935	4.94238	4.93498	4.74994	2.48552	2.01094	2.4185
ENSMUSG00000098134	Rnf113a2	0.000277843	0.00422444	0.445555	0.122569	6.07518	0.0775837	0.00185469	0.0206802	0.0140327	0.0206802	21.0854	17.9947	19.7897	10.0412	14.8175	12.5622
ENSMUSG00000027531	Impa1	0.000280421	0.00426095	-0.261282	0.0719242	7.34102	0.0207352	0.000848236	-0.000529966	0.0069114	0.0069114	70.1966	68.0202	67.4998	85.63	85.5802	88.5
ENSMUSG00000025158	Rfng	0.000281488	0.00427448	-0.228231	0.062843	8.03115	0.0203659	0.000355784	0.00556809	0.00552693	0.00556809	44.0911	44.7174	40.4952	49.6723	51.8166	60.2146
ENSMUSG00000024548	Setbp1	0.000284182	0.00431268	0.320493	0.0883069	8.0745	0.0401724	0.000361805	0.0113353	0.00547075	0.0113353	15.1918	14.0708	15.5542	9.87326	12.7277	10.181
ENSMUSG00000030465	Psd3	0.00028508	0.00432088	-0.275541	0.0759382	8.93177	0.0296969	8.47761e-05	0.00856515	0.0049339	0.00856515	104.299	96.8109	115.563	133.472	152.008	126.101
ENSMUSG00000097577	6230400D17Rik	0.000285076	0.00432088	-0.5467	0.150668	5.19248	0.0988357	0.00630167	0.00516278	0.0277497	0.0277497	5.64507	4.93343	6.32582	10.0437	8.61724	10.0344
ENSMUSG00000003099	Ppp5c	0.000285457	0.00432389	-0.272266	0.0750426	6.9921	0.0250189	0.000344788	0.00313052	0.00810231	0.00810231	93.7311	93.442	84.9253	106.057	116.97	110.187
ENSMUSG00000036256	Igfbp7	0.000287754	0.00435595	0.356871	0.0984179	6.82301	0.0498304	0.001258	0.0132711	0.00884882	0.0132711	38.2997	46.1275	53.6969	32.1464	32.4404	29.9391
ENSMUSG00000042396	Rbm7	0.000288122	0.0043588	0.239649	0.0660964	7.73179	0.0206945	0.000549424	0.00378181	0.00600368	0.00600368	58.7408	59.659	65.2527	44.8032	50.5081	48.9836
ENSMUSG00000029050	Ski	0.000289078	0.00437051	-0.268573	0.0740912	9.3897	0.0282268	8.60205e-05	0.00814824	0.00506082	0.00814824	65.5323	74.5387	82.0086	90.0064	96.577	102.156
ENSMUSG00000026632	Tatdn3	0.000290432	0.0043855	-0.293559	0.0810111	6.92152	0.0333294	0.00144536	0.00790007	0.00839883	0.00839883	48.2249	47.2726	54.5743	61.4209	59.9259	73.1787
ENSMUSG00000027335	Adra1d	0.0002903	0.0043855	-0.754327	0.208159	4.55397	0.222699	0.00888916	0.056106	0.0438022	0.056106	1.38785	1.09227	1.58493	3.92006	2.65241	2.14917
ENSMUSG00000036155	Mgat5	0.000291511	0.00439905	-0.340256	0.0939225	7.53433	0.0453179	0.000177384	0.0130548	0.00641486	0.0130548	21.9463	19.8031	20.6912	30.849	32.4624	24.3475
ENSMUSG00000006720	Zfp184	0.00029256	0.00441213	0.656934	0.181383	4.70648	0.153132	0.0100464	0.0195324	0.0393034	0.0393034	2.24442	3.20817	3.13101	1.31202	1.36471	1.68194
ENSMUSG00000049265	Kcnk3	0.000292988	0.00441221	-0.240514	0.0664142	7.8127	0.0221646	0.000757431	0.00525572	0.00585884	0.00585884	35.8113	37.8296	41.5909	46.9279	52.9049	44.8409
ENSMUSG00000063065	Mapk3	0.000293113	0.00441221	-0.26316	0.0726698	7.15321	0.027043	0.000421721	0.00741203	0.00749964	0.00749964	86.0687	77.7006	70.9976	103.378	90.1139	98.5987
ENSMUSG00000023495	Pcbp4	0.000293112	0.00441221	-0.329807	0.0910738	7.94561	0.042585	0.000909817	0.0115318	0.00564699	0.0115318	241.898	213.149	187.063	297.438	252.889	275.075
ENSMUSG00000026134	Prim2	0.000293893	0.0044212	0.369989	0.102189	6.12391	0.0435084	0.00209699	0.000953951	0.013567	0.013567	12.0848	11.7232	13.3683	8.26087	8.57621	8.59507
ENSMUSG00000027674	Pex5l	0.000294569	0.00442585	0.320753	0.088605	7.69249	0.0402857	0.000881168	0.0108951	0.00607858	0.0108951	39.76	35.6785	32.9438	22.2214	24.5937	28.32
ENSMUSG00000000600	Krit1	0.000294509	0.00442585	0.222661	0.0615072	8.25449	0.0183869	0.000405092	0.00398681	0.00526961	0.00526961	61.85	68.0976	66.7011	49.64	51.3888	57.3811
ENSMUSG00000048603	Gm9828	0.000294867	0.00442758	0.771586	0.213159	4.27283	0.215141	0.0139239	0.0317482	0.0542313	0.0542313	4.91213	7.05173	7.2081	2.66153	3.46167	2.47077
ENSMUSG00000039328	Rnf122	0.000295937	0.00444089	-0.445302	0.123051	7.17815	0.0776582	0.00117022	0.0215423	0.00741484	0.0215423	17.9569	22.3291	24.7057	35.0916	37.0511	28.648
ENSMUSG00000028436	Dcaf12	0.000298719	0.00447976	-0.221995	0.0613855	8.11977	0.0159289	0.000236926	0.00119352	0.00541535	0.00541535	35.0476	36.827	36.1561	45.799	45.944	42.1985
ENSMUSG00000002580	Mien1	0.000298898	0.00447976	-0.278357	0.0769738	7.02578	0.0249418	0.000919393	0.00120184	0.00796807	0.00796807	70.1744	73.0863	70.8309	85.1005	88.592	92.3872
ENSMUSG00000000627	Sema4f	0.000300393	0.00449937	-0.362389	0.100247	6.91424	0.0514572	0.000698071	0.0143761	0.00843065	0.0143761	19.5555	18.0237	19.3951	23.3855	32.0329	26.3659
ENSMUSG00000020599	Rgs9	0.000300927	0.00450458	0.598711	0.165641	5.39784	0.140461	0.00504646	0.0361092	0.0236139	0.0361092	5.81502	6.66023	4.266	3.06701	2.46681	3.5289
ENSMUSG00000042195	Slc35f2	0.000301118	0.00450466	0.536994	0.148573	5.19293	0.0977177	0.00537108	0.00864005	0.02774	0.02774	4.54736	4.69927	5.30103	3.31523	2.5377	2.58557
ENSMUSG00000091549	Gm6548	0.000302106	0.00451664	0.571329	0.15811	5.04624	0.102037	0.00655531	-0.00141508	0.0309429	0.0309429	9.18683	8.98241	8.75782	5.53474	4.79689	4.66847
ENSMUSG00000021273	Fdft1	0.000303006	0.00452731	-0.273816	0.0757922	7.05542	0.0287329	0.000763048	0.0070374	0.00785365	0.00785365	22.8476	25.0172	22.7206	29.7989	34.357	27.6435
ENSMUSG00000005410	Mcm5	0.000305182	0.004557	0.51164	0.141695	6.04238	0.102626	0.00350238	0.0266138	0.0143616	0.0266138	8.50404	7.89344	7.70313	4.98725	5.91738	3.68253
ENSMUSG00000026277	Stk25	0.000305905	0.00456497	-0.242535	0.0671796	7.64013	0.01879	0.000586134	0.00084257	0.00618352	0.00618352	136.083	130.883	132.6	157.866	154.212	169.388
ENSMUSG00000028743	Akr7a5	0.000306917	0.00457726	-0.352682	0.0977124	6.21334	0.0429243	0.00154782	0.00546334	0.0127737	0.0127737	22.0384	18.2853	19.0943	25.5752	28.8573	27.3925
ENSMUSG00000027412	Lpin3	0.000307881	0.00458879	-0.733793	0.203347	5.33013	0.170048	0.0371109	-0.0264704	0.0249141	0.0249141	1.72343	1.58613	1.31382	3.25809	3.26589	2.89564
ENSMUSG00000038486	Sv2a	0.000308348	0.00459009	-0.224141	0.0621202	7.89237	0.0170736	6.03102e-05	0.00244202	0.00572807	0.00572807	178.582	154.988	163.95	195.239	200.958	175.062
ENSMUSG00000068245	Phf11d	0.000308202	0.00459009	1.06787	0.295948	3.8556	0.447208	0.0397807	0.0915975	0.0779707	0.0915975	1.56306	2.48305	1.83902	0.494186	1.10114	0.506786
ENSMUSG00000051839	Gypa	0.00030916	0.00459936	1.13448	0.314477	3.60679	0.504785	0.0417352	0.106608	0.0978876	0.106608	1.10455	1.81708	3.25101	0.553179	0.599467	0.595835
ENSMUSG00000042507	Elmsan1	0.000311206	0.00462694	0.457928	0.126998	6.64875	0.0822635	0.00332232	0.0208704	0.00975187	0.0208704	9.32549	9.84535	9.40687	4.98474	7.61256	5.64994
ENSMUSG00000027495	Fam210b	0.000311426	0.00462737	-0.297218	0.0824322	6.77926	0.0267578	0.00113048	-0.000810202	0.00906212	0.00906212	8.71571	8.48092	8.34648	11.3207	11.5274	11.4046
ENSMUSG00000029298	Gbp9	0.000312356	0.00463833	0.529225	0.14681	5.5659	0.109888	0.00617173	0.0261581	0.020663	0.0261581	3.46796	4.93931	4.9188	2.60143	2.91562	2.18654
ENSMUSG00000042659	Arrdc4	0.000312732	0.00464107	0.416357	0.11551	5.77029	0.0600692	0.00241595	0.00766321	0.0175978	0.0175978	7.52288	5.86564	6.80334	4.18988	4.4167	4.62934
ENSMUSG00000074874	Ctla2b	0.000313339	0.00464232	1.17625	0.326372	3.81843	0.540625	0.079149	0.0777944	0.0806295	0.0806295	4.38193	5.53184	5.55275	0.782317	1.81319	2.34369
ENSMUSG00000024048	Myl12a	0.000313331	0.00464232	0.277318	0.0769468	7.05353	0.0301766	0.00100896	0.00787227	0.00786085	0.00787227	85.8244	77.5264	77.6799	64.8991	60.0102	50.7047
ENSMUSG00000045052	Prlhr	0.000313392	0.00464232	-0.999941	0.277455	3.74066	0.345154	0.0289424	0.0275451	0.0865298	0.0865298	0.521821	0.811519	0.728412	1.98478	2.25971	1.39371
ENSMUSG00000032609	Klhdc8b	0.000315683	0.00467339	-0.3193	0.0886432	6.79852	0.0368401	0.00281927	0.00499868	0.00896717	0.00896717	21.8244	18.0493	19.6674	29.3443	23.9878	27.217
ENSMUSG00000068923	Syt11	0.000316049	0.00467594	-0.222395	0.061746	9.9403	0.018149	9.81093e-05	0.00404078	0.00562074	0.00562074	225.272	203.481	200.427	265.469	274.02	240.403
ENSMUSG00000053024	Cntn2	0.000318943	0.00471587	-0.211044	0.0586329	9.20063	0.0163893	0.00018315	0.00360125	0.00497357	0.00497357	90.9432	92.7756	93.2855	113.797	124.087	105.209
ENSMUSG00000030873	Scnn1b	0.000320682	0.00473868	-1.41668	0.393742	3.58962	0.779785	0.133083	0.089027	0.0994666	0.0994666	0.489301	0.249346	0.148973	1.60365	0.961185	0.865406
ENSMUSG00000051483	Cbr1	0.00032111	0.00474211	-0.292948	0.0814277	6.77851	0.0319841	0.000879826	0.00691836	0.00906588	0.00906588	44.6057	41.979	35.4282	51.9954	51.4344	55.209
ENSMUSG00000040721	Zfhx2	0.000324525	0.00478961	-0.357337	0.0994014	7.8562	0.0501637	0.000430561	0.0143904	0.00578602	0.0143904	20.4216	20.9447	16.0344	27.5352	24.447	28.8733
ENSMUSG00000042810	Krba1	0.000324882	0.00479197	-0.231101	0.064291	7.86066	0.0200078	0.000421247	0.00456064	0.00577875	0.00577875	20.4722	17.0766	17.6059	23.4901	22.8845	22.4854
ENSMUSG00000096255	Dynlt1b	0.000327758	0.00483143	-0.499729	0.139111	6.83096	0.0981409	0.00170158	0.0273261	0.00881095	0.0273261	64.8146	51.842	48.4377	106.152	74.5051	81.7969
ENSMUSG00000100396	Gm29367	0.000329911	0.00486021	-0.624956	0.174053	4.81188	0.152054	0.00892775	0.0346756	0.0365139	0.0365139	4.63745	3.20136	2.82299	5.34243	7.26812	6.6091
ENSMUSG00000029816	Gpnmb	0.000330568	0.00486692	1.04804	0.291925	4.33694	0.431778	0.0116599	0.11617	0.0515427	0.11617	4.52853	2.06189	2.58043	0.923294	1.19745	0.883473
ENSMUSG00000044576	Garem2	0.00033126	0.00487414	-0.287696	0.0801485	6.87631	0.0271609	0.00103555	0.0018771	0.00860013	0.00860013	7.3532	7.03285	8.0877	10.1049	9.9841	9.58458
ENSMUSG00000031295	Phka2	0.000331493	0.0048746	-0.477481	0.133027	6.37716	0.0896319	0.00709494	0.0194493	0.0114876	0.0194493	12.4442	10.0364	9.02861	13.7193	17.8228	18.9621
ENSMUSG00000004902	Slc25a18	0.000331702	0.00487471	0.314899	0.0877352	7.5953	0.0389853	0.000502189	0.011044	0.0062783	0.011044	57.9855	47.1022	43.8625	34.0358	36.7901	35.6613
ENSMUSG00000035394	Cfap53	0.00033243	0.00488244	0.884849	0.246571	4.48841	0.307844	0.0164516	0.0747441	0.045949	0.0747441	9.90498	7.28093	7.16134	2.40689	4.94437	2.62506
ENSMUSG00000026904	Slc4a10	0.000338477	0.00496823	0.23002	0.0641811	9.81129	0.0208158	0.000366615	0.0058122	0.0054454	0.0058122	262.519	225.762	246.528	197.663	205.852	176.608
ENSMUSG00000033751	Gadd45gip1	0.000339826	0.004985	-0.272021	0.0759224	7.10055	0.0259202	0.000960419	0.00369161	0.00768589	0.00768589	14.796	17.8717	16.9258	22.0863	20.7522	21.2999
ENSMUSG00000025781	Atp5c1	0.00034024	0.00498806	-0.207681	0.05797	9.06573	0.0137598	9.9308e-05	0.000926105	0.00494147	0.00494147	439.154	442.767	421.801	498.245	510.315	531.607
ENSMUSG00000042682	Selenok	0.00034135	0.0050013	-0.261632	0.0730466	7.70013	0.0269383	0.000812754	0.00719096	0.00606378	0.00719096	159.367	153.821	130.461	183.679	169.738	190.523
ENSMUSG00000040785	Ttc3	0.000342614	0.00501677	-0.215854	0.0602817	9.44285	0.0145504	0.000356365	0.000359299	0.00509447	0.00509447	418.243	430.995	437.372	527.688	543.087	517.861
ENSMUSG00000055782	Abcd2	0.000343121	0.00502115	-0.491957	0.137404	5.18771	0.0806109	0.000468286	0.0095372	0.0278517	0.0278517	20.2163	23.2697	24.2553	33.0962	37.8632	30.7307
ENSMUSG00000046062	Ppp1r15b	0.000344255	0.00502934	0.215245	0.0601326	8.55109	0.0182382	0.000266206	0.00515769	0.00504409	0.00515769	48.4608	50.1687	57.8165	41.3901	43.4176	40.9377
ENSMUSG00000037461	Ints7	0.000343895	0.00502934	-0.280682	0.0784079	7.40615	0.0310121	0.000637086	0.00858462	0.0067327	0.00858462	19.7973	19.3167	19.0774	27.8522	21.7892	27.5839
ENSMUSG00000053835	H2-T24	0.000344304	0.00502934	0.46393	0.129609	5.67904	0.0847276	0.00326723	0.0219305	0.0188965	0.0219305	10.1197	12.509	11.197	6.8632	8.53069	5.76542
ENSMUSG00000029778	Adcyap1r1	0.000344749	0.0050328	0.24293	0.0678741	7.42269	0.0198349	0.000221115	0.00244189	0.00668923	0.00668923	57.876	53.009	51.728	42.0804	43.1335	42.069
ENSMUSG00000032773	Chrm1	0.000345194	0.00503625	1.17312	0.327798	3.78382	0.521457	0.0779804	0.0577634	0.0831969	0.0831969	0.608434	0.693686	0.702398	0.110783	0.298427	0.254842
ENSMUSG00000085428	Gm14344	0.000345604	0.00503919	-1.06804	0.298463	3.55522	0.354257	0.0308984	-0.0158441	0.102721	0.102721	2.43426	2.31852	1.90316	6.00157	5.21707	6.45396
ENSMUSG00000033161	Atp1a1	0.00034644	0.00504834	-0.270157	0.0755083	9.29759	0.0287372	1.32519e-05	0.00853899	0.00501206	0.00853899	603.756	498.729	583.841	717.638	771.777	666.872
ENSMUSG00000026553	Copa	0.000348427	0.00507423	0.208182	0.0582108	8.88631	0.0149383	0.000145949	0.00227455	0.00493679	0.00493679	150.649	141.889	156.716	117.858	126.145	118.819
ENSMUSG00000060152	Pop5	0.000349207	0.00507947	-0.318308	0.0890181	6.57226	0.0326363	0.00168964	0.00111076	0.0101967	0.0101967	84.7688	89.7159	95.1831	109.018	112.348	117.677
ENSMUSG00000057113	Npm1	0.000349169	0.00507947	0.212339	0.0593823	8.55345	0.0146399	0.000246588	0.00114533	0.0050428	0.0050428	322.888	315.431	327.14	244.406	249.549	266.688
ENSMUSG00000068373	D430041D05Rik	0.000349681	0.0050833	-0.359895	0.100658	9.60745	0.0510158	7.26679e-05	0.0151255	0.00522514	0.0151255	43.3527	45.0011	55.9155	68.9698	75.5839	61.733
ENSMUSG00000014313	Cox6c	0.0003501	0.00508634	-0.241904	0.0676638	8.76613	0.0230494	0.000225925	0.00664166	0.00495778	0.00664166	715.951	744.873	611.255	762.543	867.975	892.613
ENSMUSG00000056737	Capg	0.000351386	0.00510195	0.88947	0.248863	3.81728	0.284573	0.0121857	0.0468462	0.0807134	0.0807134	6.37279	6.9405	7.25503	3.73587	2.75203	1.74178
ENSMUSG00000061969	Gm5581	0.000351993	0.00510464	3.40674	0.953284	1.01022	3.50373	0.0418567	-0.0143869	1.32127	1.32127	0.747953	0.432962	0.588171	0	0	0
ENSMUSG00000036111	Lmo1	0.000351975	0.00510464	0.573989	0.160615	5.01666	0.111463	0.00708606	0.00869363	0.0316097	0.0316097	12.4984	10.2418	11.02	5.53385	5.77271	7.35987
ENSMUSG00000054717	Hmgb2	0.000352775	0.00511291	0.755533	0.21145	4.35014	0.198689	0.0160518	0.0182482	0.0510148	0.0510148	10.5106	7.93434	13.4726	5.03383	5.13392	5.59427
ENSMUSG00000112667	Gm48270	0.000353411	0.00511906	0.866832	0.242631	4.80728	0.296063	0.0217425	0.0665624	0.0366311	0.0665624	2.02474	2.36832	3.15908	0.734931	1.45874	1.03396
ENSMUSG00000032267	Usp28	0.000354331	0.00512931	-0.446084	0.124885	6.1767	0.0784129	0.00143093	0.0219636	0.0130904	0.0219636	46.3903	55.6998	50.087	61.1217	69.099	86.6008
ENSMUSG00000025777	Gdap1	0.00035517	0.00513838	-0.211161	0.0591266	8.47484	0.0153429	0.00015392	0.00230395	0.00509001	0.00509001	68.6317	74.9795	71.9071	84.0417	88.4243	91.7742
ENSMUSG00000039419	Cntnap2	0.000356505	0.00515336	0.32611	0.0913384	6.49715	0.0392331	0.00184839	0.00731263	0.0106657	0.0106657	38.7546	37.7726	30.6751	24.8907	24.4667	27.4874
ENSMUSG00000099034	2810039B14Rik	0.000356631	0.00515336	0.460836	0.129076	5.7458	0.0792964	0.00705572	0.012426	0.0179354	0.0179354	13.359	12.7016	13.5515	7.79852	9.9868	7.24973
ENSMUSG00000097340	Gm26617	0.000357395	0.0051613	0.440084	0.123283	5.87938	0.0763407	0.00462073	0.0181774	0.0161885	0.0181774	4.64352	4.44216	4.61457	2.30995	3.2996	3.34503
ENSMUSG00000029238	Clock	0.000358105	0.00516847	0.252894	0.070855	8.20198	0.0252112	0.000175986	0.00735467	0.00532307	0.00735467	46.6863	49.4052	56.104	39.1561	41.9771	37.1357
ENSMUSG00000037605	Adgrl3	0.000359265	0.00518213	-0.247489	0.0693571	9.0113	0.0224126	0.00228012	0.00276655	0.00493549	0.00493549	63.6454	64.2489	55.6783	76.4617	83.6143	74.4657
ENSMUSG00000018008	Cyth4	0.000359973	0.00518924	0.73148	0.205022	4.25337	0.1997	0.0079593	0.0410174	0.0550917	0.0550917	7.16006	6.3323	6.7301	4.94353	3.01614	2.79928
ENSMUSG00000024958	Gpr137	0.000362534	0.00522303	-0.295717	0.0829278	7.5122	0.0344869	0.000605423	0.0097101	0.00646669	0.0097101	39.661	34.4206	30.1	47.1303	45.0268	44.9324
ENSMUSG00000003410	Elavl3	0.000362862	0.00522465	-0.206307	0.0578585	9.08867	0.0148547	7.62195e-05	0.0025312	0.00494519	0.00494519	97.1654	94.9843	105.106	119.513	126.169	115.254
ENSMUSG00000021377	Dek	0.000364564	0.00524604	0.25036	0.0702372	7.36622	0.0224803	0.000559089	0.00403619	0.00684082	0.00684082	158.424	141.093	159.305	104.187	121.145	115.218
ENSMUSG00000025931	Paqr8	0.00036697	0.00526833	-0.252128	0.0707675	8.96408	0.0250802	6.16315e-05	0.00745043	0.00493352	0.00745043	102.132	84.3088	92.0865	124.784	123.425	111.819
ENSMUSG00000030249	Abcc9	0.000366888	0.00526833	0.316106	0.0887234	6.51273	0.033883	0.00124212	0.00364054	0.0105656	0.0105656	4.46166	4.93955	5.21796	3.64975	3.65464	3.35694
ENSMUSG00000051515	Fam181b	0.000366913	0.00526833	-0.28435	0.0798108	6.89183	0.0252893	0.00102461	0.000266344	0.00853003	0.00853003	17.1612	16.4271	16.8055	21.7582	23.1846	21.0903
ENSMUSG00000037990	Sh3rf3	0.000366985	0.00526833	0.660033	0.185259	4.64948	0.168761	0.0105686	0.0370159	0.0409129	0.0409129	2.97744	3.94437	3.71544	1.5956	2.0185	2.3998
ENSMUSG00000020917	Acly	0.000368047	0.00528044	-0.230793	0.0647933	8.20307	0.0210175	0.000563239	0.00573401	0.00532191	0.00573401	75.1824	77.2136	73.2352	88.5406	105.569	87.0151
ENSMUSG00000041939	Mvk	0.000369232	0.0052943	-0.368438	0.10346	6.02589	0.0528866	0.00152435	0.0136789	0.0145317	0.0145317	16.2305	14.6658	13.1865	22.7038	22.3473	17.3724
ENSMUSG00000060681	Slc9a6	0.000369748	0.00529855	-0.221708	0.0622639	8.48025	0.0161207	0.000728705	0.000989272	0.00508648	0.00508648	82.9629	77.7938	74.7695	94.5309	101.052	97.6519
ENSMUSG00000027184	Caprin1	0.00037211	0.00532924	0.220596	0.0619807	7.99281	0.0176707	0.000183198	0.00365667	0.00557921	0.00557921	257.818	275.99	298.016	202.393	224.537	218.519
ENSMUSG00000033735	Spr	0.000372588	0.00533293	-0.333669	0.0937596	6.35821	0.0361458	0.00156013	0.00187135	0.0116262	0.0116262	17.9272	21.0263	18.9146	27.0788	26.1445	25.6463
ENSMUSG00000015452	Ager	0.000373272	0.00533956	1.13271	0.31833	3.44864	0.455181	0.0383662	0.0494725	0.113635	0.113635	1.89705	1.26935	1.44305	0.319774	0.578958	0.592101
ENSMUSG00000000078	Klf6	0.000374116	0.00534847	0.364583	0.102477	6.50078	0.0524782	0.00105631	0.0146961	0.0106422	0.0146961	34.0584	33.6227	40.5283	23.6203	28.3409	22.6178
ENSMUSG00000004730	Adgre1	0.00037715	0.00538865	0.836	0.235124	3.89314	0.22957	0.00754039	0.0173364	0.0753843	0.0753843	4.71212	4.021	5.31128	1.90554	1.61371	2.29337
ENSMUSG00000042662	Dusp15	0.00037787	0.00539575	-0.282782	0.0795431	7.06467	0.0261033	0.00167202	0.000970032	0.00781864	0.00781864	23.11	20.4676	21.187	27.3235	28.7777	28.4863
ENSMUSG00000030329	Pianp	0.000379924	0.00542187	-0.403345	0.113502	7.57242	0.0642652	0.00540061	0.0139233	0.00632849	0.0139233	65.94	50.4837	57.1186	93.293	91.2934	70.1578
ENSMUSG00000004558	Ndrg2	0.000385308	0.00549547	-0.206779	0.0582485	8.76814	0.0149299	0.000132059	0.00249624	0.00495727	0.00495727	952.556	848.671	1024.14	920.039	987.01	929.733
ENSMUSG00000014503	Pkd2l2	0.000389673	0.00555118	0.269198	0.0758951	7.07579	0.0270427	0.000863108	0.00576482	0.00777699	0.00777699	31.1401	26.9281	30.8614	20.4686	23.5981	23.3122
ENSMUSG00000089768	Tmsb15b1	0.000389547	0.00555118	-0.917849	0.258763	3.84479	0.260547	0.0217039	-0.0119373	0.0787334	0.0787334	6.84995	7.41806	6.03204	16.7743	14.9687	14.6707
ENSMUSG00000036565	Ttyh3	0.000396396	0.00564363	-0.333205	0.09406	7.13115	0.0439244	0.000528076	0.0127428	0.00757646	0.0127428	53.1936	46.0411	41.2998	59.8943	71.1622	59.5201
ENSMUSG00000024991	Eif3a	0.000397921	0.005662	0.21102	0.0595856	9.39964	0.0176194	8.04507e-05	0.00524522	0.0050668	0.00524522	105.993	111.165	123.986	88.244	97.2953	89.2834
ENSMUSG00000029608	Rph3a	0.000399558	0.00568195	-0.211717	0.0598006	9.68905	0.0162798	5.88938e-05	0.00348187	0.00530528	0.00530528	153.025	142.092	160.232	183.7	197.265	174.955
ENSMUSG00000042644	Itpr3	0.000403733	0.00573795	-0.527185	0.149022	6.16938	0.110026	0.00245265	0.0308587	0.013155	0.0308587	1.42442	1.14489	1.76538	2.49102	2.69704	2.07204
ENSMUSG00000000552	Zfp385a	0.000403982	0.00573811	-0.324658	0.0917768	8.28698	0.0417284	0.000262247	0.0123722	0.00523864	0.0123722	52.0483	44.7481	48.6055	64.8338	76.8521	57.6987
ENSMUSG00000036840	Siah1a	0.000407043	0.00577819	0.310066	0.0877013	7.4231	0.0380721	0.000572875	0.0109644	0.00668816	0.0109644	52.0871	52.4272	58.3001	33.7948	41.2075	43.9085
ENSMUSG00000009394	Syn2	0.00040872	0.00579859	-0.207698	0.058765	9.44962	0.0145562	8.09354e-05	0.00193728	0.00509905	0.00509905	164.957	167.502	160.288	196.495	213.608	190.244
ENSMUSG00000023147	Wrb	0.000412197	0.00584449	-0.27404	0.0775846	7.04848	0.0269885	0.00114892	0.00442493	0.00788013	0.00788013	37.7727	41.9061	36.1005	46.1812	48.9844	53.1839
ENSMUSG00000020872	Tac4	0.00041542	0.00588674	1.91096	0.541334	2.53903	1.35681	0.152157	0.174445	0.287407	0.287407	1.33611	0.960589	0.985104	0.0631066	0.356281	0.116319
ENSMUSG00000111631	Gm32017	0.000415682	0.00588701	0.705818	0.199953	4.44716	0.186273	0.0125933	0.0334308	0.0473784	0.0473784	2.60635	3.66542	4.01042	1.60786	1.99641	1.37555
ENSMUSG00000000202	Btbd17	0.000417222	0.00590535	-0.409649	0.116083	5.87702	0.0635733	0.0039954	0.0125415	0.0162174	0.0162174	23.6409	22.4876	28.6441	32.7106	41.3825	32.5175
ENSMUSG00000104331	Gm38284	0.00041975	0.00593356	-0.547532	0.155225	5.11311	0.0990834	0.00667888	0.00475378	0.0294632	0.0294632	1.5759	1.44493	1.42974	2.95956	2.19268	2.67633
ENSMUSG00000075415	Fnbp1	0.000419585	0.00593356	-0.205851	0.0583568	9.09338	0.0150294	0.000162238	0.00273405	0.00494604	0.00494604	185.469	189.277	196.198	221.307	248.842	216.499
ENSMUSG00000073435	Nme3	0.000419951	0.00593356	-0.440202	0.124801	5.60323	0.0726528	0.00330222	0.0148472	0.0200608	0.0200608	36.6283	43.4724	30.9174	44.9478	47.1855	50.6854
ENSMUSG00000022488	Nckap1l	0.000420877	0.00594317	0.621263	0.176163	5.69152	0.153031	0.00487833	0.0416719	0.0187122	0.0416719	3.92842	3.82424	3.50093	2.8185	1.51295	1.92913
ENSMUSG00000033065	Pfkm	0.000422789	0.00596669	-0.215705	0.0611854	9.90199	0.0171375	4.98604e-05	0.00392383	0.00556561	0.00556561	257.399	230.273	236.888	292.729	318.781	281.674
ENSMUSG00000046167	Gldn	0.000425299	0.00599861	2.57728	0.73138	1.73944	2.58386	0.153075	0.585856	0.6493	0.6493	0.210887	0.152384	0.206749	0	0.0462904	0.00845535
ENSMUSG00000028382	Ptbp3	0.000425756	0.00600154	0.369082	0.104746	5.96234	0.0452225	0.0012396	0.00420543	0.0152181	0.0152181	17.5057	17.498	21.1029	13.6897	11.949	12.0561
ENSMUSG00000042745	Id1	0.000429646	0.00605286	0.311492	0.0884626	6.59005	0.0363983	0.00164804	0.00746461	0.0100904	0.0100904	36.0909	40.3323	45.6334	29.5615	26.6765	30.1105
ENSMUSG00000029659	Medag	0.00043005	0.00605501	-0.298375	0.0847435	6.71237	0.0315758	0.00136696	0.0047174	0.00940524	0.00940524	11.5423	11.4081	12.6674	17.802	14.9718	15.2415
ENSMUSG00000027947	Il6ra	0.000430401	0.00605642	0.508819	0.144522	5.59782	0.102733	0.00705672	0.0242731	0.0201468	0.0242731	2.62779	1.96309	2.04229	1.6044	1.3006	1.08161
ENSMUSG00000108957	Gm45235	0.000430872	0.00605953	0.488341	0.138717	5.32045	0.0945949	0.0037583	0.0250566	0.0251052	0.0251052	2.61912	2.95756	2.98651	1.91261	2.04982	1.35327
ENSMUSG00000102343	Gm37381	0.000431805	0.00606911	-0.794894	0.225832	4.09782	0.206086	0.0136745	0.00698644	0.0628258	0.0628258	3.27471	2.62768	3.34437	7.8375	5.87457	5.94259
ENSMUSG00000033082	Clec1a	0.000432817	0.00607745	0.97949	0.278326	3.59766	0.368076	0.0174738	0.0828468	0.0987241	0.0987241	1.60525	1.26361	1.81791	0.481048	0.896297	0.413805
ENSMUSG00000032479	Map4	0.000432901	0.00607745	-0.206365	0.0586401	9.42208	0.0139833	7.71688e-05	0.00143212	0.00508083	0.00508083	402.398	365.178	386.671	444.383	462.532	458.741
ENSMUSG00000069892	9930111J21Rik2	0.000433306	0.00607961	0.535099	0.152063	5.01872	0.098719	0.00312185	0.0129029	0.031563	0.031563	4.00418	3.59287	3.94158	2.0155	2.6632	1.8339
ENSMUSG00000097518	Gm26694	0.000434532	0.00609328	-0.341578	0.0970895	6.84851	0.0463142	0.00167041	0.0124692	0.00872835	0.0124692	15.3502	16.2618	14.9092	18.1762	25.1919	21.1299
ENSMUSG00000051146	Camk2n2	0.000446973	0.0062641	-0.226753	0.0645896	7.80605	0.0183792	0.000387432	0.00330526	0.00587029	0.00587029	76.4108	69.5447	65.4281	84.3805	88.2655	85.7471
ENSMUSG00000116589	CT030190.1	0.000448494	0.00628178	0.879146	0.250485	3.90055	0.282534	0.0192297	0.0441003	0.0748848	0.0748848	6.3361	5.22379	9.71794	3.2174	2.48818	2.40858
ENSMUSG00000013160	Atp6v0d1	0.000451311	0.00631586	-0.209931	0.0598417	8.31774	0.0135142	0.000160767	0.000205338	0.00521077	0.00521077	182.985	175.818	175.61	210.554	212.212	218.361
ENSMUSG00000035530	Eif1	0.00045145	0.00631586	0.210574	0.0600264	8.25232	0.014987	0.000133013	0.00197272	0.00527174	0.00527174	751.443	712.404	807.726	507.232	584.662	497.603
ENSMUSG00000105549	Gm43540	0.000453481	0.00633694	0.541533	0.154423	5.26771	0.112827	0.00960039	0.0214613	0.0261691	0.0261691	2.91897	4.06117	3.05948	2.33498	1.84908	1.64328
ENSMUSG00000020277	Pfkl	0.000453223	0.00633694	-0.453439	0.129296	6.19539	0.081743	0.00174504	0.0233312	0.0129274	0.0233312	39.386	30.0079	37.1314	56.2497	44.1476	53.4055
ENSMUSG00000036815	Dpp10	0.000454155	0.00634165	-0.242857	0.0692605	8.8058	0.0234504	0.000192203	0.00700333	0.00494871	0.00700333	121.243	113.664	124.05	162.857	161.135	134.524
ENSMUSG00000021913	Ogdhl	0.000454343	0.00634165	-0.214677	0.0612256	8.22489	0.0175294	0.000323628	0.00430585	0.00529923	0.00529923	38.8587	36.5753	32.7215	44.8807	45.5339	43.7586
ENSMUSG00000078129	Actl10	0.000454862	0.00634524	-0.635634	0.181298	4.82001	0.160652	0.00738262	0.0419209	0.0363074	0.0419209	1.76174	2.93076	2.90459	4.64596	3.97229	5.24825
ENSMUSG00000039252	Lgi2	0.000456497	0.00636437	0.308084	0.0878969	8.88411	0.0377458	0.000129706	0.0114591	0.00493701	0.0114591	50.2914	48.4055	57.9299	34.3114	42.4906	39.0704
ENSMUSG00000086350	B230369F24Rik	0.000463938	0.00646069	-0.421735	0.12047	5.72592	0.066897	0.003554	0.0133694	0.0182154	0.0182154	4.13392	5.82929	4.63871	7.84146	7.13617	7.00912
ENSMUSG00000022246	Rai14	0.000463941	0.00646069	0.451385	0.128939	5.51742	0.0664363	0.00346411	0.00317567	0.0214739	0.0214739	6.23948	5.38518	6.32289	3.96236	3.73129	3.55388
ENSMUSG00000071398	2410004P03Rik	0.000469058	0.00652444	0.885759	0.253231	3.87595	0.301388	0.0196321	0.0628898	0.0765567	0.0765567	3.89087	3.51714	3.34081	2.00621	1.52811	0.940301
ENSMUSG00000022442	Ttll1	0.000469019	0.00652444	0.295295	0.0844219	6.7359	0.0284439	0.00140843	0.00144666	0.00928216	0.00928216	21.8718	23.0541	21.5134	16.8957	17.1543	15.2967
ENSMUSG00000096629	Gm3383	0.000469694	0.00652952	0.840414	0.240292	4.02413	0.272163	0.0195432	0.0557995	0.0670672	0.0670672	8.59404	6.1793	8.56694	4.00864	4.07294	2.12648
ENSMUSG00000027544	Nfatc2	0.000471913	0.00655661	-0.343919	0.0983689	6.21411	0.0399052	0.00174745	0.00377904	0.0127672	0.0127672	5.33991	5.81513	5.62136	6.94454	8.23094	8.16048
ENSMUSG00000002379	Ndufa11	0.000473406	0.00657357	-0.244909	0.0700667	7.37322	0.0215472	0.000542476	0.00389892	0.00682154	0.00682154	244.116	239.799	220.616	252.873	253.504	291.044
ENSMUSG00000027067	Ssrp1	0.000473968	0.0065776	0.245662	0.0702886	7.33133	0.0193458	0.000471667	0.00107931	0.00693906	0.00693906	138.319	130.202	133.324	94.0318	101.994	103.168
ENSMUSG00000038147	Cd84	0.000475024	0.00658847	0.57313	0.164011	4.82845	0.125172	0.00425501	0.0290302	0.0360945	0.0360945	5.27601	5.13096	6.17534	2.34183	3.03687	3.79877
ENSMUSG00000115148	Gm49125	0.000476771	0.00660891	0.808043	0.2313	4.09786	0.237577	0.0174262	0.0346943	0.0628237	0.0628237	2.92968	3.82795	4.48994	1.44737	2.08577	1.3581
ENSMUSG00000031708	Tecr	0.00047895	0.00663531	-0.205805	0.0589317	8.56772	0.015118	0.000174267	0.00283982	0.00503515	0.00503515	399.948	353.692	350.186	432.559	436.712	401.829
ENSMUSG00000033411	Ctdspl2	0.000480115	0.00664764	0.359376	0.102925	7.6868	0.0514576	0.00118742	0.014703	0.00608969	0.014703	37.4791	34.205	45.1223	26.1834	30.1088	24.9838
ENSMUSG00000022240	Ctnnd2	0.000480806	0.0066534	-0.311756	0.0892971	6.57799	0.0358722	0.00179872	0.00659457	0.0101622	0.0101622	45.0126	45.1692	51.896	68.413	64.8095	55.7891
ENSMUSG00000024338	Psmb8	0.000485093	0.00670888	0.578184	0.165723	5.19797	0.128196	0.0135637	0.0213206	0.0276325	0.0276325	5.12519	5.53513	7.91443	3.35458	3.67553	3.54136
ENSMUSG00000013858	Tmem259	0.000485935	0.00671668	-0.212537	0.060927	8.30241	0.0157901	0.000343676	0.00245435	0.00522448	0.00522448	61.801	62.5851	62.5735	72.9329	72.4628	82.9061
ENSMUSG00000026709	Dars2	0.000486648	0.0067227	-0.366551	0.105089	6.51249	0.0535603	0.00406371	0.0125019	0.0105671	0.0125019	10.8304	14.0298	11.1666	19.1329	16.9632	15.1207
ENSMUSG00000018470	Kcnab3	0.000487473	0.00673024	-0.626534	0.179649	7.21297	0.156492	0.00166681	0.0467437	0.00730001	0.0467437	26.3082	18.9833	14.7877	35.6922	31.6875	40.0785
ENSMUSG00000001995	Sipa1l2	0.000487784	0.0067307	0.310904	0.0891512	8.4254	0.0385359	0.00023108	0.0116908	0.00512417	0.0116908	29.1575	31.3125	27.6864	18.8794	21.0072	25.041
ENSMUSG00000023927	Satb1	0.000489022	0.00674392	-0.244044	0.0699929	7.43852	0.0228094	0.000700204	0.00547748	0.00664831	0.00664831	18.509	17.3751	20.5305	21.7352	23.6032	21.8696
ENSMUSG00000017670	Elmo2	0.000490721	0.00676337	-0.264309	0.0758252	8.39463	0.0278572	0.000332693	0.00829149	0.00514721	0.00829149	113.964	104.598	120.122	140.286	162.241	129.655
ENSMUSG00000048616	Nog	0.000491271	0.00676337	-0.551049	0.158099	5.04027	0.0999757	0.00641605	0.00468313	0.0310768	0.0310768	3.14364	3.3226	2.69119	4.96196	4.90036	5.88895
ENSMUSG00000040140	Tdrd6	0.000491164	0.00676337	1.57096	0.450709	5.11515	0.984139	0.109634	0.195074	0.0294188	0.195074	3.25654	3.63851	0.951845	0.350086	0.563616	0.552215
ENSMUSG00000039114	Nrn1	0.000492243	0.00677289	-0.642742	0.184434	8.15946	0.164754	0.000296748	0.0507272	0.00536947	0.0507272	79.6664	98.9641	87.5808	133.962	147.165	228.647
ENSMUSG00000055839	Elob	0.000495	0.00680695	-0.22496	0.0645796	7.82637	0.0198109	0.00042019	0.00536593	0.00583559	0.00583559	407.63	322.596	354.635	390.412	393.374	358.437
ENSMUSG00000029169	Dhx15	0.000497062	0.00682763	0.202456	0.0581379	9.0351	0.0147705	0.000132404	0.0029601	0.00493762	0.00493762	181.242	192.735	189.539	148.001	143.499	164.397
ENSMUSG00000018395	Kif3a	0.000497068	0.00682763	-0.220529	0.0633281	7.86804	0.0158386	0.000248877	0.00131195	0.0057668	0.0057668	71.9098	72.1615	78.4741	88.7093	91.7014	90.4314
ENSMUSG00000046324	Ermp1	0.000498054	0.00683728	-0.242929	0.069771	7.42195	0.0225502	0.000610852	0.00544646	0.00669114	0.00669114	35.134	35.122	37.4953	48.0873	46.6602	39.2047
ENSMUSG00000020357	Flt4	0.000500388	0.00686542	0.5359	0.15397	5.05363	0.112396	0.00478259	0.0280164	0.0307775	0.0307775	1.36443	1.47122	1.61371	0.704474	1.13931	0.916241
ENSMUSG00000107705	Gm45062	0.00050133	0.00687209	-0.455715	0.130951	7.84555	0.0828806	0.00126983	0.0244524	0.00580354	0.0244524	14.6163	15.5787	17.242	24.0616	31.08	20.8843
ENSMUSG00000000296	Tpd52l1	0.000501442	0.00687209	0.657595	0.188965	5.36857	0.172578	0.00360397	0.0499576	0.0241681	0.0499576	20.9675	17.5019	12.625	8.18473	10.3633	6.84834
ENSMUSG00000040648	Ppip5k2	0.000508521	0.00696515	0.267105	0.0768376	7.19781	0.0284883	0.00122357	0.00763246	0.00734951	0.00763246	19.9887	20.0973	19.5538	13.2236	15.7369	17.119
ENSMUSG00000020705	Ddx42	0.000510281	0.0069853	0.234942	0.0676032	8.23196	0.0220435	0.000624502	0.00623079	0.00529204	0.00623079	81.5151	84.2421	87.209	59.8286	65.3386	74.402
ENSMUSG00000051166	Eml5	0.000511061	0.00699202	-0.217483	0.0625871	8.09527	0.0176824	0.000430795	0.00393505	0.00544492	0.00544492	196.555	190.937	199.78	243.685	210.718	246.58
ENSMUSG00000035198	Tubg1	0.00051286	0.00701266	-0.250296	0.0720494	7.22235	0.0211756	0.000516891	0.00245964	0.00726979	0.00726979	35.263	40.1118	38.2555	48.3533	45.1399	48.9422
ENSMUSG00000019179	Mdh2	0.000514597	0.00703244	-0.204734	0.0589496	8.47784	0.0156113	0.000124529	0.00367101	0.00508805	0.00508805	353.084	335.747	301.438	376.993	383.628	401.696
ENSMUSG00000020640	Itsn2	0.000519107	0.00709006	0.294528	0.0848612	6.79886	0.0318408	0.00183661	0.00543439	0.00896552	0.00896552	29.8082	30.704	32.3096	20.5317	22.6455	25.7943
ENSMUSG00000047844	Bex4	0.000521517	0.00711896	0.282946	0.0815534	6.78511	0.0279057	0.000943339	0.00391686	0.0090331	0.0090331	68.7086	68.3186	79.4042	49.2824	52.0677	52.9899
ENSMUSG00000022113	Trim52	0.000523229	0.00713829	0.842764	0.242971	5.52736	0.283917	0.0225021	0.0660504	0.021305	0.0660504	8.71209	10.1994	9.93867	2.53687	5.50687	4.78832
ENSMUSG00000042249	Grk3	0.000524043	0.00714347	-0.238286	0.0687068	7.54382	0.0223945	0.000687937	0.00601262	0.006393	0.006393	47.0348	39.6829	39.3461	53.2897	49.2215	54.9312
ENSMUSG00000063200	Nol7	0.000524199	0.00714347	-0.422795	0.12191	7.19282	0.0714611	0.0011624	0.0211308	0.00736599	0.0211308	93.6189	107.807	113.151	121.602	171.386	168.119
ENSMUSG00000038843	Gcnt1	0.000525382	0.00715556	-0.929302	0.268006	6.25916	0.345273	0.00204808	0.105692	0.0123932	0.105692	2.01608	4.33661	4.24951	8.24619	7.39162	9.98984
ENSMUSG00000073774	Kncn	0.000532347	0.00724633	2.94686	0.850729	2.27343	3.47369	0.100794	0.984815	0.378136	0.984815	0.868195	1.68598	1.13307	0	0.0595125	0.246036
ENSMUSG00000029270	Fam69a	0.000534218	0.00726771	-0.348298	0.100577	6.54458	0.0485325	0.00138981	0.0137839	0.0103657	0.0137839	42.257	45.5916	36.2942	49.9832	56.6968	65.6493
ENSMUSG00000046722	Cdc42se1	0.000535376	0.00727527	-0.315966	0.0912562	6.37423	0.0335284	0.000982697	0.00348996	0.0115088	0.0115088	43.1028	41.0783	43.1464	59.1182	56.0292	48.3849
ENSMUSG00000004056	Akt2	0.000535167	0.00727527	-0.236066	0.0681777	7.56108	0.022296	0.000549072	0.00642323	0.00635384	0.00642323	86.1614	85.2305	98.2272	106.448	121.269	106.386
ENSMUSG00000032262	Elovl4	0.000537837	0.00730461	0.291218	0.0841387	7.83661	0.0339376	0.000258945	0.01036	0.00581838	0.01036	73.8645	82.1955	84.4979	51.9525	59.3707	67.8392
ENSMUSG00000059883	Irak4	0.00054638	0.00741648	0.640276	0.185216	4.72708	0.160959	0.0127167	0.0347498	0.0387405	0.0387405	2.26092	2.17664	2.67356	0.90416	1.58151	1.33422
ENSMUSG00000103649	Gm37768	0.000547119	0.00742198	0.682074	0.197327	4.47227	0.143299	0.0119067	-0.00724273	0.0465004	0.0465004	9.19451	8.697	8.34786	3.84655	4.61432	4.34986
ENSMUSG00000033799	Fam208b	0.0005474	0.00742198	0.311592	0.0901486	6.54708	0.030069	0.00183993	-0.000662131	0.0103502	0.0103502	34.598	36.0256	34.6378	24.1797	26.2184	24.8042
ENSMUSG00000050503	Fbxl22	0.000549629	0.00744803	-0.875172	0.253282	5.54226	0.30676	0.00400724	0.0922205	0.0210545	0.0922205	1.04467	2.34514	1.91993	3.84316	3.60723	4.68734
ENSMUSG00000024565	Sall3	0.000550001	0.00744889	0.977858	0.283015	3.70211	0.365035	0.0305098	0.0672061	0.0896367	0.0896367	0.469504	0.350905	0.262558	0.0936187	0.128038	0.185104
ENSMUSG00000051319	Mtln	0.000551038	0.00745458	-0.324865	0.0940376	6.37332	0.0352603	0.00174919	0.00274957	0.0115154	0.0115154	43.2392	51.5437	48.381	59.99	62.0783	62.4198
ENSMUSG00000039485	Tspyl4	0.000550881	0.00745458	0.211464	0.0612102	9.87688	0.0176304	8.91227e-05	0.00518002	0.00553091	0.00553091	404.718	419.284	424.353	298.819	358.093	345.943
ENSMUSG00000022587	Ly6e	0.000553433	0.0074828	0.214179	0.0620185	8.07987	0.0153493	0.000305432	0.00167905	0.005464	0.005464	213.623	214.217	224.996	159.129	179.259	161.518
ENSMUSG00000002658	Gtf2f1	0.000557171	0.00752697	0.219452	0.0635788	7.9089	0.0191625	0.000361032	0.00553237	0.00570237	0.00570237	68.1436	73.5863	71.0235	50.8143	55.9402	60.8297
ENSMUSG00000024773	Atg2a	0.000557323	0.00752697	-0.308479	0.0893734	6.45632	0.0308067	0.00104653	0.0017771	0.0109349	0.0109349	13.7207	13.9559	14.6119	20.0074	17.5289	19.1905
ENSMUSG00000096929	A330023F24Rik	0.000560787	0.00756952	0.292994	0.0849281	8.2266	0.0344089	0.000407718	0.0104115	0.00529748	0.0104115	41.0333	47.0853	40.9769	29.5914	29.7629	36.7788
ENSMUSG00000002343	Armc6	0.00056119	0.00757074	0.341894	0.099108	6.30594	0.0468542	0.00248107	0.0122525	0.0120218	0.0122525	34.9493	32.7833	30.075	18.776	22.943	25.4575
ENSMUSG00000112478	Gm47761	0.000563294	0.00759489	0.743568	0.215608	5.87106	0.221652	0.00396318	0.0657671	0.0162906	0.0657671	7.14357	9.27938	10.0348	5.77159	4.02282	2.9912
ENSMUSG00000060890	Arr3	0.000564256	0.00760362	2.17839	0.631741	1.9585	1.84128	0.0774579	0.44462	0.521187	0.521187	1.99066	1.16204	1.4914	0.177191	0.391305	0.0237271
ENSMUSG00000043190	Rfesd	0.000567736	0.00764624	0.372505	0.10808	6.21762	0.0513162	0.0047844	0.00732575	0.0127375	0.0127375	23.0564	21.9641	24.3582	18.5602	14.1229	14.9118
ENSMUSG00000025491	Ifitm1	0.000570413	0.00767802	0.578498	0.167909	4.95668	0.130721	0.0093001	0.0286042	0.0329901	0.0329901	14.8456	16.2299	15.0852	5.81566	9.47375	8.83371
ENSMUSG00000040097	Flywch1	0.000570923	0.00768061	-0.203828	0.0591651	9.31763	0.0159236	0.000229124	0.00409575	0.00502165	0.00502165	160.904	142.342	138.626	170.151	186.132	175.393
ENSMUSG00000078485	Plekhn1	0.000572248	0.00769416	-0.218593	0.0634626	7.90501	0.0191114	0.000332876	0.0056378	0.00570838	0.00570838	30.3715	32.0435	28.0722	37.7114	33.7601	40.6623
ENSMUSG00000044628	Rnf208	0.000572694	0.00769588	-0.378886	0.110006	7.81585	0.057588	0.000532863	0.0176192	0.00585345	0.0176192	88.2092	69.5039	70.2211	106.083	122.48	94.984
ENSMUSG00000038722	Bud31	0.000574968	0.00771898	0.243276	0.0706549	7.35802	0.0205799	0.000624588	0.00290662	0.00686359	0.00686359	158.961	182.493	178.929	131.006	131.071	121.688
ENSMUSG00000034021	Pds5b	0.000575052	0.00771898	0.215541	0.0626006	8.1449	0.0181105	0.000492237	0.00472419	0.00538601	0.00538601	63.8441	68.6044	66.0339	49.1367	52.4657	59.1152
ENSMUSG00000029655	N4bp2l2	0.000577778	0.00773958	0.295101	0.0857393	6.70421	0.0320246	0.00157825	0.00579578	0.00944859	0.00944859	63.8002	63.2784	70.6482	50.9012	47.399	41.4305
ENSMUSG00000020744	Slc25a19	0.000577391	0.00773958	-0.30564	0.0887968	6.77428	0.0374866	0.00165823	0.0101691	0.00908693	0.0101691	48.6454	58.4922	47.0147	71.6688	68.6448	62.3559
ENSMUSG00000023959	Clic5	0.000578014	0.00773958	0.375045	0.10897	5.91677	0.0480562	0.00207108	0.00525231	0.0157406	0.0157406	4.06999	4.14795	3.96648	2.95733	2.99609	2.42041
ENSMUSG00000039148	Sart1	0.000578187	0.00773958	0.218152	0.0633858	7.93256	0.0148426	0.000360242	0.000346736	0.0056664	0.0056664	22.2614	21.2891	22.4236	17.7157	17.9655	17.0295
ENSMUSG00000024940	Ltbp3	0.000577036	0.00773958	-0.313806	0.0911647	7.98856	0.0395155	0.000362201	0.0121043	0.00558515	0.0121043	18.5136	16.2208	14.6277	24.9079	21.6351	20.594
ENSMUSG00000064246	Chil1	0.000579243	0.00774085	0.550199	0.159888	4.90016	0.112277	0.00401654	0.0228095	0.0343297	0.0343297	10.6914	12.5784	12.4813	5.19438	7.46577	7.75145
ENSMUSG00000033335	Dnm2	0.000579026	0.00774085	0.230026	0.0668436	8.06788	0.0196901	0.00122298	0.00354774	0.00547913	0.00547913	65.568	63.2942	63.1755	53.4027	44.8134	53.6401
ENSMUSG00000021136	Smoc1	0.000578813	0.00774085	0.34183	0.0993301	6.21717	0.0452722	0.00205842	0.0107139	0.0127413	0.0127413	6.68006	7.36115	5.79789	4.70064	5.1461	4.15532
ENSMUSG00000036402	Gng12	0.000581456	0.00776613	-0.253858	0.0737933	7.15804	0.0206877	0.000685133	0.00100806	0.00748304	0.00748304	55.9511	54.1694	56.1323	69.4205	73.4612	64.9508
ENSMUSG00000028081	Rps3a1	0.000582575	0.00777679	0.199792	0.0580859	9.01592	0.0134726	0.000125113	0.00174684	0.00493584	0.00493584	597.323	556.04	545.623	446.617	471.18	432.748
ENSMUSG00000042751	Nmnat2	0.000583864	0.00778539	-0.279737	0.0813424	6.6448	0.0262192	0.000150793	0.00327841	0.0097741	0.0097741	63.6723	71.5937	72	82.5424	80.359	85.501
ENSMUSG00000026918	Brd3	0.000583859	0.00778539	0.38687	0.112495	7.57915	0.0600867	0.00233484	0.0166478	0.00631361	0.0166478	36.3417	35.8814	36.9342	27.5808	27.5198	19.6509
ENSMUSG00000057614	Gnai1	0.000584916	0.00779512	-0.199595	0.0580467	9.06182	0.014575	0.000113227	0.00316629	0.00494091	0.00494091	125.13	123.762	135.8	147.748	157.885	165.26
ENSMUSG00000020388	Pdlim4	0.000585752	0.00780196	0.454201	0.132107	5.44059	0.0785676	0.0033525	0.0174952	0.0228259	0.0228259	15.292	14.4992	12.8172	11.4351	9.61242	7.02393
ENSMUSG00000027843	Ptpn22	0.000586517	0.00780784	-0.785157	0.228391	6.02105	0.247537	0.00507082	0.073173	0.0145823	0.073173	10.6908	16.3205	10.8028	21.3719	22.8568	34.1231
ENSMUSG00000029076	Sdf4	0.000588599	0.00782264	-0.208839	0.0607652	8.27828	0.0153249	0.000291839	0.00250912	0.00524678	0.00524678	133.39	119.218	117.327	149.274	148.664	141.979
ENSMUSG00000005225	Plekha8	0.000588125	0.00782264	-0.338004	0.0983418	7.03056	0.0458794	0.000704207	0.0138025	0.00794937	0.0138025	8.65106	10.6361	9.98614	15.5156	13.59	11.9151
ENSMUSG00000094724	Rnaset2b	0.000588405	0.00782264	0.328304	0.0955232	7.02039	0.0432846	0.00155086	0.0121361	0.00798927	0.0121361	87.1902	82.1444	76.6133	62.1277	60.8924	47.1085
ENSMUSG00000019916	P4ha1	0.000589079	0.00782472	-0.253626	0.0738015	7.21621	0.023823	0.000880451	0.00477611	0.00728954	0.00728954	16.2409	19.8595	17.8509	22.4919	22.6705	24.1632
ENSMUSG00000042096	Dao	0.000592151	0.00786121	-0.249826	0.0727257	7.30201	0.0240665	0.00090915	0.00576911	0.00702439	0.00702439	32.8701	33.89	38.3916	40.6306	45.0133	47.5921
ENSMUSG00000047632	Fgfbp3	0.000600159	0.00796314	0.625716	0.182343	5.68865	0.157355	0.00376796	0.0461053	0.0187545	0.0461053	12.9528	9.94029	9.67909	6.5446	4.16208	6.73008
ENSMUSG00000002983	Relb	0.00060152	0.00797464	0.793288	0.231217	4.77863	0.252945	0.0149445	0.0652474	0.0373703	0.0652474	3.14136	3.616	2.50904	1.10696	2.06533	1.13243
ENSMUSG00000025352	Gdf11	0.000601685	0.00797464	-0.308072	0.0897946	7.22425	0.0381482	0.000822568	0.011272	0.00726368	0.011272	9.671	10.3462	12.3596	15.8314	14.7701	13.1566
ENSMUSG00000032363	Adamts7	0.000602458	0.0079778	1.18838	0.346414	3.43938	0.486904	0.0653578	0.0136839	0.114646	0.114646	0.37915	0.464272	0.346486	0.123589	0.0950185	0.172249
ENSMUSG00000020790	Ankfy1	0.000602583	0.0079778	0.243166	0.0708847	7.40901	0.0216607	0.000811834	0.00409035	0.00672512	0.00672512	28.223	24.8369	28.5811	20.2092	22.1962	21.2096
ENSMUSG00000023330	Dtwd1	0.000605772	0.00801562	0.4726	0.137824	5.39515	0.0749437	0.00482875	0.00509431	0.0236644	0.0236644	10.4699	11.181	13.1755	6.67549	7.56322	6.8779
ENSMUSG00000025466	Fuom	0.000608716	0.00805017	-0.433467	0.12646	5.56185	0.066217	0.00325867	0.00905255	0.0207295	0.0207295	43.3377	40.2543	34.5674	48.6379	49.4653	58.4757
ENSMUSG00000032968	Inha	0.00060934	0.00805401	-0.343602	0.100251	6.19467	0.047479	0.0018493	0.0132261	0.0129337	0.0132261	11.5583	11.2536	8.63533	14.8394	13.4192	14.7794
ENSMUSG00000067847	Romo1	0.000614358	0.00811591	-0.384135	0.11215	5.88311	0.0478968	0.00272328	0.00181295	0.0161431	0.0161431	55.7948	48.7434	53.3495	76.207	72.8508	65.8528
ENSMUSG00000035131	Brinp3	0.000619696	0.00818195	-0.362985	0.106048	7.08391	0.0530227	0.00191729	0.0149519	0.00774687	0.0149519	18.2379	15.3378	15.7811	20.501	22.6426	28.1379
ENSMUSG00000028289	Epha7	0.000622222	0.00821082	0.280512	0.0819795	6.95147	0.0262342	0.00181049	0.00147456	0.00827046	0.00827046	20.5987	22.9608	21.7266	15.5098	17.2884	16.2897
ENSMUSG00000040687	Madd	0.000623303	0.00822059	-0.217777	0.0636539	9.72331	0.0190902	0.000641477	0.00543624	0.00534208	0.00543624	91.6983	106.031	98.068	114.84	117.098	135.654
ENSMUSG00000002489	Tiam1	0.00062677	0.00826182	-0.439342	0.128472	7.9737	0.0777125	0.000704785	0.0240527	0.0056062	0.0240527	66.5726	63.4654	84.8868	110.358	119.593	89.4011
ENSMUSG00000017781	Pitpna	0.000627959	0.00826847	-0.199455	0.0583332	8.72139	0.0121027	0.00013358	7.64215e-05	0.00497055	0.00497055	177.939	176.436	180.615	211.081	211.206	215.848
ENSMUSG00000037992	Rara	0.000627685	0.00826847	-0.38619	0.112942	6.37246	0.0600498	0.00240303	0.0167308	0.0115217	0.0167308	7.25752	6.1223	7.61937	11.2934	8.49435	10.7826
ENSMUSG00000048895	Cdk5r1	0.000630217	0.00829368	-0.225965	0.066105	7.6418	0.0179775	0.00037473	0.00294959	0.00618009	0.00618009	33.1751	29.6317	30.6715	36.6305	40.0736	39.0524
ENSMUSG00000022540	Rogdi	0.000630566	0.00829376	-0.287863	0.084217	6.68835	0.0331676	0.00110502	0.00927999	0.00953373	0.00953373	82.4772	77.8472	63.2824	89.2149	92.1611	93.2949
ENSMUSG00000038141	Tmem181a	0.000631503	0.00830156	-0.222579	0.0651251	9.0359	0.0199519	0.000160751	0.00620117	0.0049377	0.00620117	67.1788	68.5914	77.1324	97.7157	83.9201	84.9272
ENSMUSG00000055704	Gm9978	0.00063327	0.00832027	0.566745	0.165863	4.89332	0.105665	0.00677112	0.00486032	0.0344946	0.0344946	2.36636	2.14295	2.48109	1.46538	1.1262	1.36111
ENSMUSG00000078945	Naip2	0.00063454	0.00833243	0.870712	0.254862	3.92066	0.286448	0.0238841	0.0498736	0.073548	0.073548	0.933199	0.551756	0.61824	0.213846	0.285833	0.368763
ENSMUSG00000024597	Slc12a2	0.000636829	0.00835795	0.199714	0.0584742	9.33607	0.0127109	9.78865e-05	0.000833602	0.00503097	0.00503097	90.3003	89.4101	90.9792	77.0647	74.4406	71.7053
ENSMUSG00000061136	Prpf40a	0.00063721	0.0083584	0.242841	0.0711048	7.73637	0.0232913	0.00158869	0.00541095	0.00599514	0.00599514	69.1013	82.9992	74.7759	60.711	56.9065	55.4969
ENSMUSG00000007721	Ccdc124	0.000640218	0.00839332	-0.289546	0.0848121	6.6484	0.0273391	0.00103579	0.00169919	0.00975383	0.00975383	35.5477	38.5057	40.152	47.2789	51.802	48.4148
ENSMUSG00000062933	Gm10123	0.000644404	0.00843903	-0.351727	0.103079	8.78534	0.0498641	0.000245675	0.0156923	0.00495313	0.0156923	1162.57	996.293	925.575	1221.07	1229.46	1551.99
ENSMUSG00000022641	Bbx	0.000644321	0.00843903	0.274681	0.0804988	6.89008	0.030411	0.000700706	0.00901938	0.00853787	0.00901938	13.4348	13.6189	16.1918	11.1067	11.7914	9.84861
ENSMUSG00000026511	Srp9	0.000648002	0.00848156	0.223343	0.0654833	7.68784	0.0178712	0.000344454	0.0032888	0.00608764	0.00608764	124.878	126.038	109.445	91.8183	91.4777	100.027
ENSMUSG00000030000	Add2	0.000650232	0.00850615	-0.217278	0.0637227	7.82373	0.0173513	0.000250831	0.00373464	0.00584005	0.00584005	29.9735	31.2146	32.875	38.9809	41.3225	35.4856
ENSMUSG00000024953	Prdx5	0.000651391	0.00851669	-0.220453	0.0646629	8.41153	0.0195974	0.000274536	0.0059974	0.00513439	0.0059974	203.479	170.736	170.947	228.532	208.809	219.144
ENSMUSG00000038544	Inip	0.00065354	0.00853888	-0.295443	0.0866817	6.62586	0.0318459	0.00138894	0.00568597	0.00988165	0.00988165	24.6468	21.7508	24.9063	32.5553	28.0767	33.3698
ENSMUSG00000032254	Kif23	0.000653794	0.00853888	1.07	0.313943	3.59114	0.461742	0.0479263	0.0999144	0.0993255	0.0999144	5.56509	7.61894	5.5706	1.19725	1.67546	3.64176
ENSMUSG00000028847	Trappc3	0.000655963	0.00855828	-0.217946	0.0639633	7.80751	0.0168469	0.000269191	0.00297676	0.00586777	0.00586777	108.586	97.4871	103.351	134.328	121.62	118.434
ENSMUSG00000038224	Serpinf2	0.000655987	0.00855828	2.72972	0.801129	1.44448	3.00558	0.0553771	0.907334	0.868915	0.907334	0.627764	0.313294	0.382414	0	0.118895	0
ENSMUSG00000079508	Apoo	0.000658027	0.00858025	-0.245711	0.0721302	7.58835	0.0201953	0.00151074	0.00109318	0.00629341	0.00629341	88.207	96.2067	86.2325	118.147	109.609	108.555
ENSMUSG00000036461	Elf1	0.000660192	0.00860385	0.303338	0.0890704	6.47461	0.0305438	0.00108735	0.00258714	0.010813	0.010813	9.2404	9.43916	9.35549	7.2208	7.26704	6.25664
ENSMUSG00000038745	Nlrp6	0.000661299	0.00861363	1.20899	0.355049	3.30208	0.534459	0.0580986	0.0618513	0.130991	0.130991	0.895779	0.364806	0.478305	0.142635	0.18488	0.151196
ENSMUSG00000025104	Hdgfl3	0.000663396	0.00863567	0.216614	0.06363	7.83968	0.0159757	0.000259893	0.00211418	0.00581327	0.00581327	43.8301	44.4377	43.606	32.7822	34.7276	36.9241
ENSMUSG00000055137	Sugct	0.000664062	0.00863567	0.690198	0.202761	5.05474	0.192246	0.00653964	0.0551283	0.0307527	0.0551283	11.1906	9.04411	8.46775	5.77772	5.52151	3.25262
ENSMUSG00000096883	Shisa8	0.000663716	0.00863567	-0.774765	0.227595	6.65512	0.242237	0.00258229	0.0751167	0.00971626	0.0751167	12.6133	7.76123	16.7368	26.1937	25.338	24.0989
ENSMUSG00000022533	Atp13a3	0.000664492	0.00863661	0.295347	0.0867691	6.60676	0.0323747	0.00130122	0.00645595	0.0099921	0.0099921	65.529	67.252	69.4766	40.4125	51.5274	44.3882
ENSMUSG00000067924	Rtl8b	0.000667326	0.00866878	-0.205462	0.0603828	8.37936	0.0168761	0.000309979	0.00495463	0.00515914	0.00515914	140.929	120.675	119.821	158.403	144.846	152.174
ENSMUSG00000027404	Snrpb	0.000669303	0.00868513	0.209661	0.0616313	8.16779	0.0157895	0.000337479	0.00291529	0.00536016	0.00536016	153.207	130.132	139.197	111.046	111.289	108.61
ENSMUSG00000108991	Gm45807	0.000669209	0.00868513	1.28522	0.377796	3.31689	0.559954	0.0849951	-0.00447563	0.1291	0.1291	0.974292	1.0674	0.788524	0.38292	0.177808	0.228168
ENSMUSG00000028337	Coro2a	0.000670105	0.00869087	-0.336374	0.098889	6.14145	0.0410309	0.0012626	0.00759586	0.0134059	0.0134059	13.5111	11.134	12.0837	16.3398	18.2603	15.6246
ENSMUSG00000042354	Gnl3	0.000670627	0.00869298	0.351953	0.103476	6.02222	0.0380894	0.00149073	-0.000330611	0.0145701	0.0145701	57.0243	56.094	49.5538	31.0199	37.6368	37.0872
ENSMUSG00000089907	Gm16169	0.000671081	0.00869421	0.648739	0.190742	4.51613	0.143342	0.00955051	0.0118044	0.0450233	0.0450233	3.24168	3.3894	3.95011	1.70752	1.57472	2.20378
ENSMUSG00000054312	Mrps21	0.000675368	0.00874506	-0.317021	0.0932584	6.3811	0.0321135	0.00158663	0.000866739	0.0114591	0.0114591	118.485	116.969	128.938	158.957	147.329	147.307
ENSMUSG00000023805	Synj2	0.000677645	0.00876985	0.237436	0.0698656	7.59384	0.0190427	0.00104033	0.00162214	0.00628146	0.00628146	24.0833	22.5278	25.2555	17.9213	19.6333	18.1315
ENSMUSG00000061331	Gm17132	0.000679637	0.00878622	0.321326	0.0945726	6.39757	0.0344228	0.00207496	0.00223465	0.011341	0.011341	35.3109	38.6085	39.606	25.6705	28.9287	26.2784
ENSMUSG00000045312	Lhfpl2	0.000679418	0.00878622	-0.495006	0.145686	5.81968	0.0989789	0.0029906	0.0288462	0.0169406	0.0288462	21.0038	16.8395	23.7872	33.2685	26.3323	31.415
ENSMUSG00000034107	Ano7	0.0006827	0.0088151	1.34057	0.394699	3.48402	0.711232	0.123816	0.0913017	0.109865	0.109865	1.46242	0.650033	0.620566	0.134118	0.339944	0.243571
ENSMUSG00000024072	Yipf4	0.000682965	0.0088151	0.274194	0.0807325	6.81819	0.0267962	0.00090469	0.00439718	0.00887191	0.00887191	93.0819	89.5447	94.4691	60.7521	73.374	70.356
ENSMUSG00000100034	Gm28469	0.000682329	0.0088151	-2.85089	0.839341	1.35221	3.06781	0.105963	0.680964	0.950776	0.950776	0	0.0563709	0	0.678702	0.184884	0.261613
ENSMUSG00000050526	4933406M09Rik	0.000683568	0.00881817	3.31018	0.974705	0.961944	3.29576	0.0418024	-0.0310886	1.38327	1.38327	0.376675	0.377875	0.287783	0	0	0
ENSMUSG00000028344	Invs	0.000686318	0.00884893	0.757338	0.223075	6.99816	0.231783	0.0068065	0.0678373	0.00807784	0.0678373	25.0725	30.255	26.0199	9.62205	19.1712	11.3278
ENSMUSG00000098206	A430106G13Rik	0.000687906	0.00886467	-0.547167	0.161199	5.02278	0.121	0.00662222	0.0323555	0.0314711	0.0323555	1.79235	2.21378	1.61619	2.53918	3.27383	4.02384
ENSMUSG00000030317	Timp4	0.000689313	0.00887808	-0.237006	0.069835	8.75712	0.0227038	0.000628149	0.00668724	0.00496014	0.00668724	65.8876	74.6369	78.667	93.4558	97.6873	84.6374
ENSMUSG00000042390	Gatad2b	0.000697394	0.00897422	0.411575	0.121387	7.42564	0.0685	0.000296633	0.0218056	0.00668155	0.0218056	42.2882	44.0959	52.4826	32.0344	34.5814	25.2207
ENSMUSG00000019883	Echdc1	0.000697521	0.00897422	-0.294008	0.0867138	6.64088	0.0317318	0.00148276	0.00576673	0.00979618	0.00979618	27.5783	31.3435	29.9925	36.2891	38.4207	43.7306
ENSMUSG00000030881	Arfip2	0.000698589	0.00898318	-0.255635	0.0754056	7.2963	0.0232785	0.00148768	0.00310441	0.00704133	0.00704133	64.3992	59.1076	58.7469	76.3119	68.2239	80.6259
ENSMUSG00000042763	Maneal	0.000699966	0.00899611	-0.213993	0.0631324	7.93795	0.0182025	0.000320203	0.00526055	0.00565834	0.00565834	38.2724	33.8604	39.8679	47.653	46.2073	43.1265
ENSMUSG00000025370	Cdh9	0.000703855	0.00904128	0.769969	0.227259	4.7091	0.239832	0.0105812	0.0668886	0.0392313	0.0668886	3.36143	2.20934	1.99669	0.819457	1.28936	1.37841
ENSMUSG00000033644	Piwil2	0.000705286	0.00905486	1.27155	0.375362	2.942	0.545193	0.0223383	0.0528418	0.189007	0.189007	1.59787	1.74862	2.02587	0.606263	0.629082	0.347255
ENSMUSG00000041134	Cyyr1	0.000709769	0.00910757	0.45577	0.134613	5.30178	0.0685234	0.00170355	0.00605323	0.0254775	0.0254775	5.75771	5.8305	4.94949	3.32339	3.25682	3.56615
ENSMUSG00000025092	Hspa12a	0.000711269	0.00912197	-0.197805	0.0584325	8.78025	0.0149612	0.000167218	0.00386172	0.00495431	0.00495431	37.0774	43.5622	41.3183	49.1593	51.2525	47.8342
ENSMUSG00000084375	Gm11637	0.000712888	0.00913789	-0.859559	0.253964	3.86717	0.24828	0.019583	0.0137006	0.0771634	0.0771634	3.74957	3.61869	4.62586	9.84812	7.54357	11.0936
ENSMUSG00000025764	Jade1	0.00071777	0.00919072	0.379893	0.112305	5.73034	0.0529473	0.000765697	0.0112991	0.0181528	0.0181528	43.6182	37.1097	43.8265	23.5392	28.1601	26.3958
ENSMUSG00000021967	Mrpl57	0.000717741	0.00919072	-0.311512	0.0920894	6.99043	0.0392644	0.00461158	0.00807907	0.0081091	0.0081091	31.8735	30.3649	24.7549	43.5048	37.5027	36.1437
ENSMUSG00000024180	Tmem8	0.00071826	0.00919213	-0.326434	0.0965062	6.23531	0.0409439	0.00138102	0.00983929	0.0125892	0.0125892	6.06312	6.47395	6.26281	7.99228	7.74947	10.1188
ENSMUSG00000004360	9330159F19Rik	0.000719899	0.00920823	0.288241	0.085231	8.11444	0.0336421	0.000315753	0.0105807	0.0054217	0.0105807	51.8045	57.0241	64.3791	39.3403	46.6147	43.0448
ENSMUSG00000030699	Tbx6	0.000724645	0.00926403	0.915207	0.270765	4.06511	0.339257	0.0167217	0.0932486	0.0646703	0.0932486	1.74944	2.23236	2.40537	0.562694	1.33698	0.749971
ENSMUSG00000087501	Gm12116	0.000725794	0.00927382	-0.533611	0.15789	5.15174	0.115337	0.00568839	0.0317053	0.0286242	0.0317053	1.84693	2.23547	1.83194	3.82574	3.85921	2.48207
ENSMUSG00000066798	Zbtb6	0.000726755	0.00928119	0.251139	0.0743172	7.3724	0.0255488	0.000726211	0.00755835	0.00682379	0.00755835	17.1201	20.0612	21.143	14.5072	14.8084	16.0619
ENSMUSG00000112148	Lilrb4a	0.000729982	0.00931748	0.895749	0.265167	3.8524	0.315562	0.0272746	0.0662905	0.0781954	0.0781954	1.8133	2.89654	2.33067	1.19517	0.922132	0.552953
ENSMUSG00000116942	AC087898.5	0.000731151	0.00932748	2.31924	0.686648	2.60713	2.17944	0.140891	0.566337	0.267784	0.566337	6.85474	7.3528	16.235	0.766506	2.41124	0.178833
ENSMUSG00000025047	Pdcd11	0.000737266	0.00940053	0.227966	0.0675389	7.56079	0.0184867	0.00048776	0.00313236	0.00635449	0.00635449	12.8566	12.45	13.0787	10.3559	10.85	9.234
ENSMUSG00000004936	Map2k1	0.000738534	0.00940677	-0.240161	0.0711618	7.21303	0.0202155	0.000296195	0.00334411	0.00729982	0.00729982	104.467	97.0482	92.7203	107.605	120.111	120.657
ENSMUSG00000112410	B230217J21Rik	0.000738405	0.00940677	1.1677	0.345995	3.27336	0.515358	0.0448124	0.0880648	0.134756	0.134756	0.635932	0.966576	0.648831	0.291242	0.296321	0.12876
ENSMUSG00000096146	Kcnj11	0.000743	0.00945868	-0.53263	0.1579	4.89725	0.105232	0.00299904	0.0221554	0.0343998	0.0343998	16.146	17.7359	23.0629	25.1107	24.2807	24.0681
ENSMUSG00000037979	Ccdc92	0.000744414	0.00947169	-0.253732	0.0752317	7.41827	0.023318	0.00178894	0.0032161	0.00670078	0.00670078	102.862	110.569	112.994	122.61	149.782	135.669
ENSMUSG00000024423	Impact	0.000746329	0.00949106	0.249161	0.0738919	7.14609	0.0242123	0.000665794	0.00631912	0.00752423	0.00752423	174.859	173.812	145.418	111.487	121.653	121.954
ENSMUSG00000043068	Fam89a	0.000747285	0.00949822	0.866299	0.256939	3.88727	0.249974	0.0232437	0.00779665	0.0757826	0.0757826	2.26683	2.7746	2.53163	0.828962	1.32038	0.98672
ENSMUSG00000064125	Prr36	0.000754582	0.0095809	-0.640579	0.190143	4.3365	0.12813	0.00267101	0.00361371	0.0515603	0.0515603	5.14997	4.44295	4.3754	7.8778	7.76997	7.68694
ENSMUSG00000091537	Tma7	0.000754386	0.0095809	-0.321734	0.0954982	6.31068	0.036357	0.0016947	0.00493415	0.0119851	0.0119851	142.515	146.45	138.332	164.249	174.321	196.732
ENSMUSG00000024436	Mrps18b	0.000756686	0.00960256	0.35177	0.104439	6.30147	0.0502118	0.00174827	0.0146131	0.0120566	0.0146131	46.3355	50.0126	48.231	39.594	28.6718	30.4022
ENSMUSG00000085555	2610035F20Rik	0.000758249	0.00961735	-0.449817	0.133572	5.89115	0.0821102	0.00344974	0.0233124	0.0160456	0.0233124	8.60094	9.66137	13.0064	16.6877	16.5449	14.3131
ENSMUSG00000056692	D17Wsu92e	0.00076283	0.00967039	-0.201138	0.0597567	8.34262	0.0153615	0.000167043	0.00386376	0.00518925	0.00518925	89.4464	90.5058	100.654	114.472	117.502	104.631
ENSMUSG00000034761	Map4k5	0.000766714	0.0097145	0.215173	0.0639532	8.20552	0.0156932	0.000815677	0.00143854	0.00531934	0.00531934	45.0946	47.099	46.3372	36.4495	35.5123	40.44
ENSMUSG00000005936	Kctd20	0.000767114	0.0097145	-0.243153	0.0722725	7.60936	0.024005	0.000808379	0.00702658	0.00624807	0.00702658	42.4849	41.9643	47.7251	50.4548	52.5404	61.4316
ENSMUSG00000032375	Aph1b	0.000768573	0.00972788	-0.209394	0.062248	8.05586	0.0155582	0.000317697	0.00268778	0.00549452	0.00549452	27.1367	24.3695	26.8588	30.6106	33.1814	32.7412
ENSMUSG00000023904	Hcfc1r1	0.000770633	0.00974748	-0.233045	0.0692941	7.81725	0.0220551	0.000371888	0.00683063	0.00585106	0.00683063	179.889	178.102	155.554	190.036	194.444	221.036
ENSMUSG00000057440	Mpp7	0.000770928	0.00974748	-0.444933	0.132301	7.37509	0.0803939	0.00106272	0.0251927	0.00681642	0.0251927	21.5451	24.1316	29.5277	38.1934	41.4856	33.4008
ENSMUSG00000056413	Adap1	0.000772301	0.00975973	-0.22384	0.0665688	7.71963	0.016213	0.00062057	0.000856621	0.00602653	0.00602653	67.3288	66.5762	63.4369	84.9198	81.1249	77.5
ENSMUSG00000020846	Rflnb	0.000774876	0.00978716	-0.279964	0.0832824	7.65204	0.031837	0.000391341	0.0100126	0.00615911	0.0100126	19.0124	22.5318	23.095	26.2356	27.3323	31.7079
ENSMUSG00000029560	Snx8	0.000776541	0.00980307	0.304045	0.0904621	6.65485	0.0341845	0.00255732	0.00550698	0.00971776	0.00971776	20.4136	16.284	19.0203	13.3932	14.0546	12.6587
ENSMUSG00000035258	Abi3bp	0.000777156	0.00980571	-0.336569	0.100145	6.76976	0.0460184	0.00102174	0.0140218	0.00910958	0.0140218	8.22172	8.25809	9.95542	11.9218	14.1182	11.1118
ENSMUSG00000018398	Sept8	0.000778515	0.00981774	-0.194937	0.0580114	9.18453	0.0127985	7.95459e-05	0.00166845	0.00496844	0.00496844	213.108	216.12	215.343	263.001	266.717	238.829
ENSMUSG00000032621	Srek1	0.000779669	0.00982716	0.232456	0.069185	7.52713	0.0190771	0.000748262	0.00283469	0.00643159	0.00643159	78.1865	72.1211	73.5072	61.3188	59.4134	53.4216
ENSMUSG00000034854	Mfsd12	0.000781492	0.00984501	-0.258907	0.0770724	6.93086	0.023841	0.000551855	0.00411206	0.00835839	0.00835839	15.2949	13.2297	14.4478	17.3565	19.0379	18.6272
ENSMUSG00000015869	Prpsap1	0.000784569	0.00987862	-0.283475	0.0844131	6.93782	0.032658	0.000894069	0.00979429	0.00832848	0.00979429	59.2083	67.3579	57.3688	69.4677	78.5751	89.9439
ENSMUSG00000022285	Ywhaz	0.000787821	0.0099144	-0.198982	0.0592732	8.32297	0.0148534	6.37898e-05	0.00365526	0.00520617	0.00520617	424.563	441.463	453.407	462.989	526.267	499.068
ENSMUSG00000027828	Ssr3	0.000788699	0.00992002	0.200334	0.0596814	8.33394	0.0131396	0.000146144	0.00122816	0.00519665	0.00519665	186.644	178.227	184.197	141.513	148.537	155.231
ENSMUSG00000042766	Trim46	0.000790319	0.00992002	0.220337	0.0656514	7.83416	0.0178825	0.000642674	0.00350478	0.00582249	0.00582249	39.713	35.1515	40.98	29.7657	31.3734	30.2488
ENSMUSG00000019763	Rmnd1	0.000790149	0.00992002	-0.314081	0.0935816	6.40508	0.0396501	0.00184846	0.0107216	0.0112878	0.0112878	45.5956	54.3326	61.3404	69.4258	68.9406	72.2038
ENSMUSG00000038976	Ppp1r9b	0.000789964	0.00992002	-0.196696	0.0586051	9.36898	0.0142551	0.000103036	0.00320736	0.0050488	0.0050488	119.782	108.039	122.887	136.352	147.771	137.082
ENSMUSG00000034457	Eda2r	0.000789948	0.00992002	0.965175	0.287572	3.59262	0.377777	0.0248576	0.0980277	0.0991886	0.0991886	1.34602	1.45878	2.06625	0.825019	0.703491	0.337009
ENSMUSG00000022494	Shisa9	0.000791771	0.00993309	-0.369989	0.110258	5.80742	0.0451903	0.00113452	0.00401903	0.0171008	0.0171008	12.7209	12.0932	14.0414	16.8413	18.9007	18.1848
ENSMUSG00000028243	Ubxn2b	0.000805831	0.0101042	0.359312	0.107232	7.55309	0.0525301	0.000409677	0.0168385	0.00637189	0.0168385	13.451	15.9008	18.5206	10.5296	12.0776	10.7275
ENSMUSG00000051832	E230016K23Rik	0.000806731	0.0101103	3.27284	0.97683	0.943275	3.22215	0.0233305	-0.0124655	1.40796	1.40796	1.06682	0.930906	0.778358	0	0	0
ENSMUSG00000024962	Vegfb	0.000807585	0.0101157	-0.259648	0.0775027	7.0188	0.0230941	0.00101449	0.00257163	0.00799552	0.00799552	37.4275	39.1748	36.9526	46.4715	52.151	44.2762
ENSMUSG00000031149	Praf2	0.000808057	0.0101164	-0.222601	0.0664477	7.66184	0.0155715	0.000483664	0.000399028	0.00613928	0.00613928	63.256	64.8263	62.11	74.7011	80.5598	78.387
ENSMUSG00000030942	Thumpd1	0.00080985	0.0101336	0.263552	0.0786861	7.19303	0.0282677	0.000513948	0.00877331	0.00736527	0.00877331	39.8638	43.2097	40.387	26.989	33.246	33.902
ENSMUSG00000028657	Ppt1	0.000815882	0.0102038	-0.202141	0.0603883	8.25778	0.0129341	0.000203711	0.000641107	0.00526641	0.00526641	94.8609	91.1439	88.1571	106.949	111.003	112.227
ENSMUSG00000036644	Tbc1d9b	0.00081761	0.0102201	-0.324155	0.0968562	6.17951	0.0364082	0.00100595	0.00510065	0.0130657	0.0130657	46.228	48.2958	44.3156	57.3039	66.6558	59.5424
ENSMUSG00000047656	Trpt1	0.000819672	0.0102406	-0.389174	0.116308	5.79721	0.0551854	0.00305556	0.00913019	0.0172357	0.0172357	11.2257	10.8448	10.5869	18.6679	14.239	14.4956
ENSMUSG00000020155	Kcnmb1	0.000821671	0.0102603	0.727811	0.217556	4.2138	0.2025	0.0140876	0.0403972	0.0569086	0.0569086	0.800276	1.02825	1.04355	0.410364	0.36058	0.634909
ENSMUSG00000026981	Il1rn	0.000828458	0.0103397	3.28365	0.982214	0.948676	3.28105	0.0463378	0.0115924	1.40078	1.40078	0.530268	0.324546	0.641794	0	0	0
ENSMUSG00000105636	Gm43625	0.000832514	0.0103778	1.17301	0.351016	3.3459	0.498487	0.0593304	0.0477977	0.125488	0.125488	1.28948	1.69841	2.32446	0.338356	0.675672	0.582316
ENSMUSG00000078794	Dact3	0.000832801	0.0103778	-0.25242	0.0755373	7.07243	0.0234949	0.000769321	0.00470594	0.00778951	0.00778951	11.3636	14.1013	12.3886	15.6182	16.6451	15.9111
ENSMUSG00000045636	Mtus1	0.000832225	0.0103778	-0.229553	0.0686904	7.35437	0.02132	0.000203771	0.00668575	0.00687378	0.00687378	110.532	122.036	131.004	137.934	161.249	134.783
ENSMUSG00000027465	Tbc1d20	0.00083482	0.0103976	0.287929	0.0861808	6.49613	0.0255247	0.000468455	0.000348747	0.0106723	0.0106723	46.6187	47.2478	46.7736	37.0661	36.3144	34.3783
ENSMUSG00000036181	Hist1h1c	0.000838784	0.0104346	0.4925	0.14747	6.9508	0.0988636	0.000926089	0.0316949	0.00827327	0.0316949	42.9055	36.084	34.2272	17.9263	22.4432	28.3534
ENSMUSG00000034254	Agpat1	0.000838944	0.0104346	-0.227513	0.0681256	7.50418	0.0208453	0.000475866	0.00616991	0.00648577	0.00648577	51.7654	51.4568	52.2698	69.3399	64.9221	54.7584
ENSMUSG00000041057	Wdr43	0.000839086	0.0104346	0.33346	0.0998511	6.22164	0.0366427	0.00225184	0.00185329	0.0127035	0.0127035	70.9445	82.243	70.6731	47.5583	49.6796	48.1387
ENSMUSG00000105245	Gm31305	0.000841607	0.0104552	0.553271	0.165713	5.48785	0.124786	0.00445976	0.0367313	0.0219845	0.0367313	24.3082	26.6626	30.7963	19.1695	14.7884	11.2081
ENSMUSG00000004609	Cd33	0.000841783	0.0104552	0.698538	0.209226	4.84472	0.198917	0.00645347	0.0592097	0.0356869	0.0592097	4.25253	3.14195	4.75522	1.62453	1.77437	2.71856
ENSMUSG00000025656	Arhgef9	0.000842037	0.0104552	-0.196774	0.0589393	8.55616	0.0122556	0.000169438	0.000630008	0.00504132	0.00504132	97.8464	95.9624	97.7204	114.884	122.552	115.047
ENSMUSG00000027593	Raly	0.000842931	0.0104609	-0.204606	0.0612905	8.28142	0.0133681	0.000390967	0.000620248	0.00524383	0.00524383	142.847	134.355	135.034	169.342	163.955	162.06
ENSMUSG00000057522	Spop	0.000843885	0.0104674	-0.226076	0.0677283	7.45841	0.018963	0.000282815	0.00425455	0.00659786	0.00659786	167.986	157.006	167.088	176.421	214.295	193.46
ENSMUSG00000024158	Hagh	0.000847787	0.0105104	-0.229036	0.0686414	7.44756	0.0188134	0.000442205	0.00340304	0.00662525	0.00662525	126.618	117.659	127.811	152.707	154.041	139.241
ENSMUSG00000078903	Gm14391	0.000850468	0.0105382	0.262091	0.0785686	7.76877	0.0280152	0.00241493	0.00684461	0.00593595	0.00684461	78.9525	86.8067	89.8984	71.6777	66.4218	57.333
ENSMUSG00000038291	Snx25	0.000852577	0.0105589	-0.307507	0.0922021	6.27421	0.0356741	0.000479886	0.00865264	0.012272	0.012272	36.0119	37.5663	38.9212	42.7351	47.6894	55.4155
ENSMUSG00000029821	Gsdme	0.000854212	0.0105738	0.326899	0.0980323	7.21615	0.0435913	0.000944165	0.0134713	0.00728973	0.0134713	25.9999	24.0608	23.8794	16.121	19.5605	18.7878
ENSMUSG00000033187	BC016579	0.000857005	0.0106029	1.8977	0.569248	2.84647	1.46923	0.0848001	0.401266	0.208755	0.401266	0.667658	1.16419	1.31626	0.243417	0.248549	0.0411145
ENSMUSG00000028249	Sdcbp	0.000865296	0.0107	-0.197321	0.0592375	8.54545	0.0156997	0.000216414	0.00480737	0.00504721	0.00504721	163.187	177.865	187.808	202.853	227.133	202.721
ENSMUSG00000027715	Ccna2	0.000873087	0.0107908	0.594657	0.178655	4.93631	0.144145	0.0144083	0.0331663	0.0334682	0.0334682	4.31664	6.18488	6.01415	2.30965	3.38968	2.90075
ENSMUSG00000027131	Emc4	0.000874471	0.0108024	-0.213715	0.0642158	7.79844	0.0150865	0.000302041	0.0014282	0.00588347	0.00588347	138.669	143.023	135.332	156.459	169.29	170.105
ENSMUSG00000033669	Zfp7	0.000876307	0.0108196	-0.400732	0.120431	6.443	0.0655802	0.00210811	0.0196472	0.0110249	0.0196472	6.60492	8.75522	9.23145	10.8715	11.8165	13.2648
ENSMUSG00000031536	Polb	0.000876868	0.010821	-0.230084	0.0691501	8.40085	0.0216197	0.000457891	0.00671472	0.00514244	0.00671472	79.714	85.7869	89.0212	98.0602	102.46	118.891
ENSMUSG00000029202	Pds5a	0.000880621	0.0108617	0.203357	0.0611394	8.32629	0.014058	0.000403762	0.00166098	0.00520327	0.00520327	90.0634	94.1101	95.6404	72.4244	76.7486	80.2442
ENSMUSG00000086837	Gm16618	0.000882561	0.0108801	0.67358	0.202549	4.42769	0.173371	0.0134632	0.0331097	0.048076	0.048076	6.47902	7.19089	7.0269	2.40422	4.34603	3.53568
ENSMUSG00000074467	Gm10702	0.00088533	0.0109087	-3.39234	1.02036	2.01774	4.70175	0.869701	0.692008	0.490877	0.692008	0	0	0.374487	1.45044	1.2409	1.77929
ENSMUSG00000002052	Supt6	0.000885783	0.0109087	0.200462	0.0602984	8.98968	0.0164186	0.000130497	0.00532336	0.00493422	0.00532336	61.6397	61.5663	69.8967	49.9669	56.6503	50.7272
ENSMUSG00000027296	Itpka	0.00089046	0.0109607	-0.233262	0.0701955	7.70159	0.0222362	0.000556706	0.0068344	0.00606095	0.0068344	41.6391	41.5969	44.9775	52.3134	59.874	47.3364
ENSMUSG00000036620	Mgat4b	0.000896329	0.0110226	-0.303845	0.0914865	6.36316	0.0354485	0.00096501	0.00872499	0.0115897	0.0115897	50.5847	39.7507	46.242	61.3352	56.8201	52.8222
ENSMUSG00000018678	Sp2	0.00089684	0.0110226	0.278967	0.0839999	6.73445	0.0301313	0.00129429	0.00718642	0.00928967	0.00928967	13.1875	10.3751	12.0015	8.5799	9.16445	8.79736
ENSMUSG00000019235	Rps6kl1	0.000896854	0.0110226	-0.375032	0.112926	6.59266	0.0574974	0.00107481	0.0180537	0.0100749	0.0180537	12.6142	9.48431	9.28105	16.3992	13.7701	14.607
ENSMUSG00000014813	Stc1	0.000898583	0.0110382	0.82981	0.249906	3.90704	0.245456	0.0192288	0.0293713	0.0744504	0.0744504	0.91485	0.668138	0.874608	0.337853	0.462998	0.274953
ENSMUSG00000027656	Wisp2	0.000899968	0.011044	1.24287	0.37435	3.07761	0.505279	0.0460003	0.00633041	0.164207	0.164207	1.09363	1.46244	1.18082	0.383342	0.443809	0.261034
ENSMUSG00000081597	Gm14506	0.000899856	0.011044	-1.29651	0.390502	3.12419	0.549143	0.0721907	-0.0161092	0.156547	0.156547	1.45995	2.24391	1.73506	7.90616	4.79113	6.12338
ENSMUSG00000086712	AI427809	0.000901409	0.0110561	2.53009	0.762164	1.71943	2.48045	0.20897	0.491079	0.662369	0.662369	2.62991	1.22351	0.836738	0.105847	0.227128	0
ENSMUSG00000046743	Fat4	0.000902843	0.0110681	0.343309	0.103432	6.0303	0.0393124	0.00156135	0.00338129	0.0144859	0.0144859	2.07121	1.84085	1.95971	1.30785	1.50273	1.36574
ENSMUSG00000034789	Rab24	0.000906301	0.0111048	-0.375635	0.113208	6.94423	0.0577097	0.00389716	0.0153268	0.00830114	0.0153268	40.0646	35.9836	29.1623	52.1474	43.6699	53.1409
ENSMUSG00000031503	Col4a2	0.000910325	0.0111316	0.393437	0.118617	5.67284	0.055164	0.00211626	0.00879139	0.0189888	0.0189888	14.8977	17.6913	16.4825	9.5362	10.8274	11.6926
ENSMUSG00000031749	St3gal2	0.000910049	0.0111316	-0.438269	0.13213	6.13313	0.078574	0.000276742	0.0259108	0.013482	0.0259108	39.7965	35.6988	41.3173	60.6804	67.8492	55.3723
ENSMUSG00000097059	Fam120aos	0.000909295	0.0111316	-0.339297	0.102285	6.08886	0.0451494	0.00179399	0.0114719	0.0138992	0.0138992	11.5208	8.48354	9.77813	12.781	13.7661	14.2547
ENSMUSG00000041747	Utp15	0.000909557	0.0111316	0.289094	0.0871526	6.9642	0.0341873	0.00187944	0.00951391	0.008217	0.00951391	26.4533	25.0282	32.2106	20.9298	19.3315	21.9957
ENSMUSG00000039960	Rhou	0.000910793	0.0111317	-0.273403	0.0824315	7.21759	0.0305786	0.000541025	0.0096514	0.00728511	0.0096514	28.3473	23.1093	24.5847	34.929	34.3128	29.4081
ENSMUSG00000044707	Ccnjl	0.000911366	0.011133	-0.552735	0.16666	5.78931	0.124985	0.00227988	0.0393832	0.017341	0.0393832	5.9107	6.40812	9.31437	14.2894	11.8525	10.5352
ENSMUSG00000024317	Rnf138	0.000912648	0.0111431	0.252309	0.0760848	7.11858	0.0210506	0.00106232	0.00137856	0.00762102	0.00762102	31.574	34.5823	31.3071	25.6191	23.7213	26.2964
ENSMUSG00000063430	Wscd2	0.000916787	0.0111879	-0.278293	0.0839523	8.6542	0.0316916	0.00022481	0.0103472	0.00499483	0.0103472	53.5483	48.0627	55.0136	67.4372	74.0415	57.6348
ENSMUSG00000086600	C030005K06Rik	0.000918339	0.0112012	-0.913971	0.275756	3.79677	0.333768	0.0318367	0.0721194	0.0822254	0.0822254	2.06281	2.23496	3.45506	4.75463	5.04044	9.19474
ENSMUSG00000021359	Tfap2a	0.000920134	0.0112175	-0.375124	0.113198	5.9164	0.0490433	0.00347576	0.00505921	0.0157449	0.0157449	6.07878	6.73405	5.66827	8.8836	8.05292	9.61595
ENSMUSG00000040759	Cmtm5	0.000922022	0.0112348	-0.250058	0.075471	7.03059	0.0223055	0.000594548	0.00383888	0.00794926	0.00794926	92.9162	99.1732	88.951	120.941	112.589	104.453
ENSMUSG00000085744	Gm12259	0.000923627	0.011243	3.03139	0.91505	1.16751	2.96728	0.119237	0.14387	1.13674	1.13674	9.58313	4.91795	4.18701	0	0	0.332608
ENSMUSG00000090675	Olfr111	0.000923408	0.011243	2.42844	0.733029	1.78035	2.30688	0.182676	0.489436	0.623322	0.623322	0.364248	0.490347	0.274865	0.0728104	0.0370584	0
ENSMUSG00000027993	Trim2	0.000926383	0.0112709	-0.193439	0.0584058	8.57393	0.0145401	8.49522e-05	0.00405819	0.00503191	0.00503191	95.1827	90.0553	101.117	113.532	123.127	107.405
ENSMUSG00000068959	Zfp619	0.000927196	0.0112751	0.318742	0.0962462	6.28518	0.034446	0.00171037	0.00324849	0.0121846	0.0121846	4.39337	4.81346	5.30424	3.50131	3.52154	3.55692
ENSMUSG00000102413	Gm36937	0.000930039	0.011304	-0.633658	0.191387	4.5913	0.132753	0.0123017	0.0030691	0.0426417	0.0426417	14.8934	18.3273	19.0935	30.7621	26.9985	31.4736
ENSMUSG00000028470	Hint2	0.000931537	0.0113109	-0.352386	0.106447	6.03365	0.0499946	0.00254526	0.0133821	0.0144512	0.0144512	47.5504	39.9227	40.9635	55.7731	47.1949	51.1596
ENSMUSG00000022766	Serpind1	0.000931084	0.0113109	0.550733	0.166356	5.72493	0.124201	0.00349081	0.0380208	0.0182295	0.0380208	7.94605	9.21788	8.71005	5.16924	6.2255	3.63368
ENSMUSG00000026790	Odf2	0.000932944	0.0113166	-0.318527	0.0962315	8.82697	0.0415503	0.000806417	0.0130843	0.00494474	0.0130843	113.805	115.205	100.429	173.744	128.925	144.832
ENSMUSG00000070394	Tmem256	0.000932818	0.0113166	-0.275483	0.0832265	6.78748	0.0264025	0.00136859	0.00317538	0.00902139	0.00902139	150.306	137.214	141.781	182.558	156.928	176.605
ENSMUSG00000107306	Gm42577	0.000934039	0.0113242	0.663811	0.200567	4.42312	0.164009	0.0120988	0.0276708	0.0482417	0.0482417	1.98847	1.23041	1.52757	0.772648	0.920824	0.687491
ENSMUSG00000021635	Rad17	0.000936181	0.0113444	0.270815	0.0818412	7.16394	0.0300399	0.000640375	0.00940659	0.00746288	0.00940659	26.8958	29.231	30.4375	19.2837	24.0475	23.1609
ENSMUSG00000055897	Ppp4r1l-ps	0.000944053	0.011434	0.397834	0.120312	5.73581	0.0577879	0.00363685	0.0092461	0.0180755	0.0180755	15.2531	14.2535	11.5706	8.29726	9.51523	9.27822
ENSMUSG00000112117	Rmst	0.00094531	0.011434	1.23118	0.372372	6.22693	0.621135	0.012514	0.195478	0.0126591	0.195478	101.406	76.3669	82.5661	18.9219	16.7179	46.7013
ENSMUSG00000040276	Pacsin1	0.000944713	0.011434	-0.194802	0.0589149	8.73248	0.0134978	0.000239316	0.00240259	0.00496713	0.00496713	123.197	123.31	134.806	147.493	160.251	144.345
ENSMUSG00000049303	Syt12	0.000945463	0.011434	-0.40004	0.120994	7.20514	0.065577	0.000989275	0.0209701	0.0073255	0.0209701	34.5302	37.1249	46.9899	56.6258	65.5391	50.8045
[truncated: 22,176 more rows]

## Sheet: B6J_vs_NMF205 DE gene
target_id	ext_gene	pval	qval	b	se_b	mean_obs	var_obs	tech_var	sigma_sq	smooth_sigma_sq	final_sigma_sq	NMF205_1	NMF205_2	NMF205_3	wtJ_1	wtJ_2	wtJ_3
ENSMUSG00000031297	Slc7a3	8.06324e-112	1.9759e-107	3.35	0.149084	7.17993	3.39342	0.00196548	0.0313736	0.00867711	0.0313736	104.045	143.592	135.237	4.52012	5.09336	3.54476
ENSMUSG00000027313	Chac1	4.2319e-84	5.18513e-80	2.03272	0.104613	6.3106	1.25086	0.00246359	0.0116275	0.0139522	0.0139522	27.5585	38.0004	34.5497	4.25041	4.29832	4.10587
ENSMUSG00000025403	Shmt2	9.22383e-72	7.53433e-68	1.53508	0.0856931	7.04198	0.715752	0.000666024	0.0103489	0.00925687	0.0103489	139.386	186.075	167.565	32.8699	36.1271	32.9483
ENSMUSG00000028893	Sesn2	2.67801e-66	1.64062e-62	1.96949	0.114509	7.84468	1.1794	0.000598638	0.0190697	0.00678295	0.0190697	54.6871	74.7947	67.1006	9.16603	9.80325	7.83676
ENSMUSG00000020256	Aldh1l2	5.9525e-57	2.91732e-53	1.66931	0.104962	6.34469	0.846138	0.00286932	0.00982876	0.0136563	0.0136563	40.8083	42.748	41.5288	8.38637	8.35429	6.39151
ENSMUSG00000031026	Trim66	2.52576e-47	1.03156e-43	2.35941	0.163287	7.2697	1.70204	0.00111483	0.0388792	0.00834003	0.0388792	28.9205	36.632	43.2839	2.71224	3.89397	3.569
ENSMUSG00000030785	Cox6a2	3.46701e-40	1.2137e-36	3.40274	0.256428	4.3951	3.5525	0.0392212	0.059412	0.0543423	0.059412	25.4699	43.9901	38.7746	1.18174	0.733002	1.4648
ENSMUSG00000029752	Asns	7.24759e-35	2.22003e-31	1.35525	0.110022	7.10547	0.56554	0.000328709	0.0178286	0.0089803	0.0178286	252.639	363.008	338.075	72.6982	77.7162	78.3754
ENSMUSG00000031770	Herpud1	2.67689e-34	7.28859e-31	0.938624	0.0768598	7.28403	0.271393	0.000408728	0.00845241	0.00828894	0.00845241	144.213	184.733	174.887	60.0078	67.1647	61.876
ENSMUSG00000042834	Nrep	2.1092e-33	4.69873e-30	-0.833364	0.0691986	10.6451	0.2119	1.93626e-05	0.00441952	0.0071633	0.0071633	534.709	597.765	534.571	1241.63	1185.03	1352.63
ENSMUSG00000046805	Mpeg1	2.00563e-33	4.69873e-30	1.07891	0.0895566	6.79485	0.356467	0.00152238	0.00754457	0.0105082	0.0105082	13.3408	12.8647	15.5368	5.08893	4.58727	4.28031
ENSMUSG00000028811	Yars	7.31782e-33	1.49436e-29	0.872908	0.0731075	7.55937	0.233762	0.000578035	0.00588641	0.00743903	0.00743903	200.489	224.832	226.989	82.1188	83.5277	96.4677
ENSMUSG00000032637	Atxn2l	3.50431e-32	6.60563e-29	0.77718	0.0658121	9.32492	0.1864	0.0002973	0.00619955	0.00557486	0.00619955	153.805	184.737	173.198	82.3151	75.2823	73.0604
ENSMUSG00000040010	Slc7a5	4.20884e-32	7.36697e-29	1.35078	0.114535	6.78487	0.563127	0.000521399	0.0191559	0.0105649	0.0191559	141.517	168.447	168.537	46.0976	41.4872	32.514
ENSMUSG00000005667	Mthfd2	2.08358e-31	3.40387e-28	1.54877	0.132848	5.86304	0.740783	0.0030031	0.0234697	0.018979	0.0234697	71.7216	99.4576	96.5831	14.5298	19.8461	17.5872
ENSMUSG00000057715	A830018L16Rik	5.49931e-31	8.42254e-28	1.99233	0.172119	6.90899	1.22636	0.00356366	0.0408738	0.00989451	0.0408738	54.9375	76.7802	72.458	9.67512	6.92092	10.2144
ENSMUSG00000038539	Atf5	1.31488e-30	1.89537e-27	1.3283	0.115502	7.38834	0.545324	0.000543285	0.0194676	0.00793854	0.0194676	54.7741	72.4788	55.9012	14.3397	18.147	14.6814
ENSMUSG00000032715	Trib3	3.35366e-30	4.56564e-27	3.47145	0.304001	3.54079	3.72353	0.0244677	0.110845	0.114157	0.114157	17.2889	22.6316	20.4052	0.318213	0.528839	0.776268
ENSMUSG00000027298	Tyro3	2.70124e-28	3.48389e-25	-1.02114	0.0925682	6.50515	0.315834	0.000470728	0.0032975	0.0123826	0.0123826	29.4162	32.3933	32.8558	83.8923	80.5577	97.7438
ENSMUSG00000042532	Golga7b	5.59359e-28	6.85354e-25	-0.703981	0.0641991	8.38789	0.153272	0.000217632	0.00552608	0.00596466	0.00596466	41.3532	40.8762	34.4777	76.4454	73.4059	81.3406
ENSMUSG00000038244	Mical2	1.02773e-27	1.19926e-24	-0.698427	0.0640147	8.65185	0.148326	0.000413182	0.00206881	0.00573363	0.00573363	61.4263	61.7913	58.0551	113.887	125.702	121.182
ENSMUSG00000027965	Olfm3	8.75768e-27	9.75486e-24	-0.661374	0.0617303	9.26728	0.134367	0.000150939	0.00377773	0.00556501	0.00556501	101.074	100.719	108.35	181.281	199.315	212.001
ENSMUSG00000026220	Slc16a14	1.33626e-26	1.42369e-23	1.29537	0.121349	6.10641	0.514916	0.00614653	0.0082517	0.015942	0.015942	18.8419	20.1683	19.4168	6.37297	4.83336	4.64857
ENSMUSG00000068739	Sars	9.38507e-26	9.58255e-23	0.695711	0.0663077	9.14371	0.15048	0.000300409	0.00629465	0.00555867	0.00629465	254.528	306.48	304.587	143.803	140.413	136.55
ENSMUSG00000020428	Gabra6	1.29336e-25	1.26775e-22	-0.698475	0.0667641	10.4037	0.148217	3.88886e-05	0.00228179	0.00664728	0.00664728	450.524	474.439	478.891	896.127	894.973	985.649
ENSMUSG00000020142	Slc1a4	6.55458e-25	5.94889e-22	1.10115	0.106835	8.13306	0.377454	0.000348706	0.016772	0.00628707	0.016772	45.6445	61.1474	59.2451	19.644	17.271	16.9487
ENSMUSG00000047904	Sstr2	6.47181e-25	5.94889e-22	2.09843	0.203569	4.4962	1.36328	0.0116018	0.0412171	0.050559	0.050559	6.83584	6.09469	8.30768	0.658848	1.05052	1.01034
ENSMUSG00000028364	Tnc	1.46052e-24	1.27822e-21	-1.13323	0.110779	7.33559	0.399988	0.000737576	0.0176703	0.00811112	0.0176703	3.74222	4.7879	4.44464	13.9752	14.4966	11.3104
ENSMUSG00000036887	C1qa	1.52788e-24	1.29106e-21	0.925445	0.0905056	6.70497	0.261327	0.00124906	0.00424079	0.0110378	0.0110378	42.8762	52.532	48.6126	18.5714	18.2364	18.542
ENSMUSG00000037703	Lzts3	3.05445e-24	2.49498e-21	-0.657002	0.0646786	8.34301	0.132167	0.000260876	0.00307831	0.0060141	0.0060141	24.7062	22.1656	21.1715	44.4244	43.4922	40.4462
ENSMUSG00000044067	Gpr22	5.94497e-24	4.69941e-21	-0.759513	0.075253	7.35139	0.175624	0.000436059	0.00277098	0.00805846	0.00805846	31.0654	28.6948	33.0072	64.8205	67.0027	62.466
ENSMUSG00000020096	Tbata	6.46353e-24	4.94965e-21	-0.887954	0.0880506	6.87943	0.245842	0.00119316	0.0104362	0.0100475	0.0104362	32.4337	26.013	24.4496	65.8587	63.7147	64.2765
ENSMUSG00000044165	Bcl2l15	2.18252e-23	1.62069e-20	-0.786712	0.0789525	7.31513	0.191428	0.00116966	0.00602199	0.00818059	0.00818059	81.6796	64.4499	70.0803	148.177	151.639	158.572
ENSMUSG00000026494	Kif26b	3.76079e-23	2.71053e-20	-0.712418	0.0718877	7.7508	0.158463	0.00023474	0.00751702	0.00697753	0.00751702	9.21848	8.37852	8.06543	17.5378	18.9099	15.1327
ENSMUSG00000026163	Sphkap	4.74629e-23	3.32308e-20	-0.65635	0.0663861	10.3033	0.133989	0.000143481	0.00579393	0.00646718	0.00646718	132.935	160.567	142.464	264.73	284.997	275.461
ENSMUSG00000004267	Eno2	5.589e-23	3.8044e-20	-0.640425	0.0648828	8.88188	0.128095	0.000177164	0.0061375	0.00561162	0.0061375	390.902	314.393	353.449	655.617	647.95	629.596
ENSMUSG00000026674	Ddr2	8.49457e-23	5.62593e-20	1.89385	0.192692	6.69533	1.12056	0.00361086	0.0520842	0.0110973	0.0520842	36.5045	56.9647	54.2581	7.08548	8.83591	5.634
ENSMUSG00000057615	Ldoc1	8.76283e-23	5.65087e-20	-1.18468	0.120575	5.88698	0.424526	0.00316291	0.00119529	0.0186444	0.0186444	5.5274	5.47019	6.33002	18.1635	19.411	17.8888
ENSMUSG00000022658	Tagln3	1.87646e-22	1.17904e-19	-0.719619	0.0738202	8.99264	0.161895	0.00011851	0.00805561	0.00557819	0.00805561	189.905	185.827	187.79	351.376	348.15	432.177
ENSMUSG00000061859	Patj	8.10057e-22	4.96261e-19	-0.814851	0.0848923	7.70869	0.207843	0.000690566	0.0101195	0.00707095	0.0101195	24.6291	21.439	23.6366	56.6449	54.3274	44.095
ENSMUSG00000025478	Dpysl4	1.08276e-21	6.4715e-19	-0.611839	0.0639419	8.88852	0.11442	0.000523688	0.00212062	0.00560915	0.00560915	64.5292	57.0695	62.1303	114.295	106.141	111.947
ENSMUSG00000036896	C1qc	1.96691e-21	1.1476e-18	0.927951	0.0976096	6.46173	0.261926	0.00158264	0.00291441	0.0127088	0.0127088	36.6775	40.9945	37.3387	16.0128	15.4198	14.227
ENSMUSG00000027122	Arl14ep	6.70012e-21	3.81829e-18	0.928	0.0989511	7.93468	0.270105	0.000664868	0.0140221	0.00661221	0.0140221	97.404	129.413	128.613	44.874	46.3698	45.8693
ENSMUSG00000025592	Dach2	7.23961e-21	4.03197e-18	1.55216	0.165649	5.76639	0.755687	0.00522341	0.0359357	0.0204115	0.0359357	8.90726	13.2041	13.3559	2.68105	2.00406	2.58142
ENSMUSG00000036905	C1qb	2.99816e-20	1.63266e-17	0.807918	0.0876359	6.82902	0.204417	0.0012022	0.00954538	0.0103179	0.0103179	42.4737	52.5977	55.4554	20.9153	21.1185	22.9329
ENSMUSG00000002032	Tmem25	3.14845e-20	1.67723e-17	-0.657101	0.0713172	7.75269	0.13508	0.000655753	0.00627642	0.00697346	0.00697346	41.8875	43.6549	37.2882	82.0315	75.9299	74.1554
ENSMUSG00000038781	Stap2	4.52903e-20	2.36136e-17	-1.1233	0.122434	6.29594	0.396527	0.00171252	0.0207728	0.0140823	0.0207728	6.9087	8.02902	7.89069	27.0743	18.4583	23.7695
ENSMUSG00000031490	Eif4ebp1	4.80432e-20	2.45271e-17	2.4359	0.265687	5.10578	1.86479	0.00901417	0.09687	0.0336708	0.09687	14.6706	23.0931	16.906	1.34688	2.40912	1.19537
ENSMUSG00000010095	Slc3a2	5.45542e-20	2.72827e-17	0.900165	0.0983291	8.26945	0.254691	0.000272627	0.0142303	0.00610181	0.0142303	312.069	427.752	398.644	155.201	155.045	137.549
ENSMUSG00000041313	Slc7a1	8.63038e-20	4.19424e-17	1.34339	0.147545	7.171	0.567534	0.000814478	0.0318399	0.00871232	0.0318399	41.6363	58.0991	57.4247	12.075	15.8412	11.7633
ENSMUSG00000024299	Adamts10	8.72909e-20	4.19424e-17	-0.766636	0.0842113	8.60472	0.184829	0.000618389	0.0100189	0.00576758	0.0100189	33.4059	40.8476	40.8877	80.044	74.6445	88.6842
ENSMUSG00000046607	Hrk	1.30319e-19	6.1413e-17	1.16402	0.128478	6.18903	0.426293	0.00147283	0.023287	0.0150875	0.023287	9.4608	12.7705	10.438	3.5724	3.69998	2.73453
ENSMUSG00000020303	Stc2	2.9537e-19	1.36567e-16	2.8021	0.312371	3.5912	2.47263	0.00904296	0.137321	0.108854	0.137321	13.9741	24.5696	23.4503	1.75875	1.11534	0.670988
ENSMUSG00000024493	Lars	3.3707e-19	1.52961e-16	0.8147	0.0909683	8.28093	0.209051	0.000242114	0.0121707	0.00608758	0.0121707	54.3365	72.1278	61.9493	28.5584	27.4098	25.6483
ENSMUSG00000028059	Arhgef2	7.54025e-19	3.35952e-16	1.21257	0.136757	7.37628	0.463542	0.00121295	0.0268408	0.00797718	0.0268408	180.271	220.077	231.554	68.5933	70.4939	50.936
ENSMUSG00000021423	Ly86	1.1111e-18	4.86204e-16	1.04072	0.117951	6.31102	0.341626	0.00387837	0.0169904	0.0139485	0.0169904	16.5011	24.0888	22.7851	6.84334	7.17575	7.77099
ENSMUSG00000007944	Ttc9b	1.40563e-18	6.04297e-16	-0.788422	0.0896242	6.83238	0.196122	0.00117406	0.0108747	0.0102994	0.0108747	11.5996	10.768	8.73134	20.6236	23.4102	22.6666
ENSMUSG00000028698	Pik3r3	1.4927e-18	6.30665e-16	-0.573026	0.0651891	8.4071	0.103607	0.000167158	0.00620727	0.00594443	0.00620727	85.1538	74.6821	85.856	135.481	156.276	133.366
ENSMUSG00000074305	Peak1	2.12803e-18	8.83855e-16	-0.706	0.080683	7.39016	0.157342	0.000414783	0.00934984	0.00793275	0.00934984	10.1913	9.78815	9.8891	20.9369	22.3809	17.4151
ENSMUSG00000048065	Cyb5r2	2.7557e-18	1.12547e-15	4.32185	0.495564	3.86823	5.89822	0.20058	0.167796	0.0843305	0.167796	5.56747	10.5728	11.1968	0.0380753	0.195296	0.141055
ENSMUSG00000025007	Aldh18a1	3.29289e-18	1.32282e-15	0.999731	0.1149	6.08763	0.311535	0.0036548	0.0109658	0.0161482	0.0161482	67.7927	83.1912	79.459	30.4213	28.3833	23.7221
ENSMUSG00000040972	Igsf21	4.81835e-18	1.90442e-15	-0.61196	0.0706848	7.70954	0.115354	0.000425497	0.0033317	0.00706901	0.00706901	29.1283	31.7431	27.2709	50.4148	55.8527	52.5763
ENSMUSG00000019194	Scn1b	5.20034e-18	2.02277e-15	-0.53239	0.0615558	9.32893	0.0863716	0.00010797	0.00156705	0.00557571	0.00557571	206.06	226.199	206.555	356.18	366.459	341.636
ENSMUSG00000051401	Kctd16	6.95258e-18	2.66208e-15	1.98918	0.230879	4.26503	1.2224	0.0199996	0.0241843	0.0599579	0.0599579	4.72591	6.9621	7.46913	0.791812	0.989555	0.701845
ENSMUSG00000000805	Car4	7.06505e-18	2.66352e-15	-1.02379	0.118854	7.54748	0.331395	0.000505858	0.0206835	0.00747096	0.0206835	98.2541	133.876	150.318	347.512	301.237	354.944
ENSMUSG00000026456	Cyb5r1	8.62189e-18	3.2012e-15	1.65256	0.19236	6.38486	0.863691	0.00176399	0.0537395	0.0133194	0.0537395	62.3631	107.144	119.071	18.1395	16.8922	17.6238
ENSMUSG00000005045	Chd5	1.04508e-17	3.82233e-15	1.20714	0.140875	8.12188	0.460968	0.000543687	0.0292248	0.00630361	0.0292248	23.3592	19.4116	21.1706	4.873	6.65347	7.51252
ENSMUSG00000025408	Ddit3	1.5972e-17	5.7558e-15	0.867329	0.101801	7.3502	0.238114	0.000704562	0.0148405	0.0080624	0.0148405	105.135	141.557	138.072	50.2686	50.181	55.2402
ENSMUSG00000050663	Trhde	2.10768e-17	7.48534e-15	-0.628075	0.0739982	7.45254	0.123296	0.000473001	0.00571809	0.0077406	0.0077406	13.2895	15.4502	13.131	24.2577	27.7516	24.8689
ENSMUSG00000031700	Gpt2	2.68147e-17	9.38707e-15	0.817258	0.0966065	6.62084	0.211573	0.00102247	0.0129767	0.0115743	0.0129767	68.4011	83.3127	89.87	34.9476	37.6556	30.2859
ENSMUSG00000041670	Rims1	3.21546e-17	1.09437e-14	-0.531561	0.0629927	9.71568	0.0888535	0.000191919	0.00491602	0.0057602	0.0057602	93.1444	85.4969	75.9289	136.846	140.072	148.579
ENSMUSG00000054136	Adm2	3.19731e-17	1.09437e-14	5.97435	0.707936	2.96174	11.3093	0.0494231	0.702336	0.201666	0.702336	6.93149	14.7002	13.1544	0	0.0901978	0
ENSMUSG00000108414	Snhg1	3.84445e-17	1.29052e-14	0.817932	0.0971699	6.45216	0.21156	0.00138051	0.0121896	0.0127825	0.0127825	102.076	133.056	114.021	47.0495	52.6944	53.6952
ENSMUSG00000052336	Cx3cr1	4.05526e-17	1.34289e-14	0.69882	0.0830812	7.03805	0.1501	0.00107919	0.00341466	0.00927454	0.00927454	15.7069	14.4786	16.8889	7.33814	7.65452	7.93582
ENSMUSG00000108053	Gm43890	4.15292e-17	1.3569e-14	1.81956	0.216395	4.43803	1.02446	0.0175591	0.0214639	0.0526811	0.0526811	2.77935	3.62097	3.57851	0.679233	0.47909	0.433457
ENSMUSG00000021186	Fbln5	7.31881e-17	2.35983e-14	1.34255	0.160943	6.5395	0.571816	0.00207551	0.0367786	0.0121336	0.0367786	17.9879	27.1103	24.7039	4.92918	6.00229	6.89837
ENSMUSG00000038390	Gpr162	9.66112e-17	3.07462e-14	-0.542073	0.0652402	8.68626	0.0932606	0.00036338	0.00602105	0.00571079	0.00602105	57.3932	52.7506	45.5614	85.2111	88.9301	86.3796
ENSMUSG00000038642	Ctss	9.90642e-17	3.11227e-14	0.659895	0.0794489	7.21904	0.133598	0.000941606	0.00275805	0.00852658	0.00852658	61.8626	64.3104	65.7556	33.6028	29.4379	34.0043
ENSMUSG00000052726	Kcnt2	1.25897e-16	3.90521e-14	2.91868	0.352609	4.63042	2.70481	0.019403	0.167096	0.0461388	0.167096	8.02847	8.38163	9.56831	0.213076	0.61052	0.660028
ENSMUSG00000034161	Scx	1.32013e-16	4.04372e-14	-1.62094	0.195961	4.92779	0.821763	0.0196354	0.0222789	0.0379655	0.0379655	1.43044	1.33448	1.84917	9.50049	6.02601	7.61317
ENSMUSG00000066189	Cacng3	1.53826e-16	4.6537e-14	1.34562	0.163036	5.75562	0.575103	0.00638617	0.033485	0.0205793	0.033485	24.0496	36.7128	38.6894	8.83263	7.40414	8.6068
ENSMUSG00000027797	Dclk1	2.07334e-16	6.19601e-14	-0.507792	0.061792	9.5199	0.0794417	8.62572e-05	0.00252099	0.00564112	0.00564112	132.495	143.405	148.245	223.936	229.393	241.651
ENSMUSG00000078607	1810010H24Rik	2.17252e-16	6.41417e-14	1.06513	0.129701	5.87883	0.352746	0.00647623	0.00902021	0.0187574	0.0187574	18.05	22.075	19.0757	6.80914	7.52558	5.68195
ENSMUSG00000029777	Gars	2.47968e-16	7.23387e-14	0.896812	0.109417	7.77439	0.255648	0.000127571	0.0178306	0.00692702	0.0178306	205.939	286.814	276.835	93.796	103.949	99.2255
ENSMUSG00000025889	Snca	2.63966e-16	7.60998e-14	-0.629774	0.0769073	7.93505	0.126082	0.000419544	0.00845254	0.00661154	0.00845254	72.8933	77.0794	80.6698	125.095	148.657	157.687
ENSMUSG00000098178	Gm42418	4.10434e-16	1.1695e-13	-1.11115	0.136582	7.37198	0.392783	0.00189927	0.0260825	0.00799108	0.0260825	16.8386	24.3509	17.8312	56.3284	67.4767	50.9309
ENSMUSG00000029471	Camkk2	4.61325e-16	1.2994e-13	-0.554578	0.0682871	7.85854	0.0960974	0.000239019	0.00454902	0.00675567	0.00675567	79.7035	78.7056	70.5144	129.005	137.143	120.909
ENSMUSG00000036242	Armh4	5.11281e-16	1.42374e-13	-0.512548	0.063209	8.5766	0.0816682	0.000203732	0.00336696	0.00578933	0.00578933	55.783	54.1567	47.6111	82.7145	87.1224	87.7565
ENSMUSG00000004455	Ppp1cc	8.02364e-16	2.20921e-13	-0.512728	0.0636626	8.77295	0.0836022	0.000418932	0.0055	0.00566045	0.00566045	262.545	261.594	235.404	385.347	401.835	444.974
ENSMUSG00000097166	9330179D12Rik	9.07524e-16	2.47099e-13	1.79884	0.223771	4.40954	0.995971	0.0213361	0.0101936	0.053774	0.053774	9.22138	10.7455	10.3095	2.10936	1.3547	1.44252
ENSMUSG00000022208	Jph4	1.51423e-15	4.0776e-13	-0.62079	0.0778343	9.14483	0.122884	0.000317209	0.00877007	0.00555863	0.00877007	74.1315	62.3648	56.8786	111.441	121.312	118.353
ENSMUSG00000060882	Kcnd2	1.67919e-15	4.47267e-13	-0.48946	0.0614668	9.34303	0.0761011	8.83915e-05	0.0051987	0.00557887	0.00557887	78.8342	77.4562	65.2205	118.61	122.048	114.608
ENSMUSG00000100153	Ppp1ccb	2.24282e-15	5.9097e-13	-0.570289	0.0719415	8.1961	0.101594	0.00156566	0.00346538	0.00619772	0.00619772	108.889	101.242	118.656	177.1	200.661	188.892
ENSMUSG00000020932	Gfap	2.44655e-15	6.37794e-13	0.832701	0.105188	9.37083	0.221295	0.000128372	0.0164684	0.00558587	0.0164684	221.918	307.016	270.274	116.928	104.777	116.937
ENSMUSG00000017167	Cntnap1	2.82277e-15	7.28127e-13	-0.497579	0.0629967	8.59756	0.0780061	0.000179853	0.00448334	0.00577302	0.00577302	50.6777	43.131	49.3988	76.2996	79.8869	74.7153
ENSMUSG00000027634	Ndrg3	5.44817e-15	1.3907e-12	-0.488403	0.0624867	8.64995	0.0751745	0.00012194	0.00439473	0.00573494	0.00573494	397.234	401.76	389.286	642.58	664.402	573.442
ENSMUSG00000031654	Cbln1	6.28378e-15	1.58747e-12	-0.54295	0.0696258	10.2686	0.0942559	3.46365e-05	0.007237	0.00640929	0.007237	493.694	569.652	446.528	861.16	811.789	861.593
ENSMUSG00000062488	Ifit3b	6.91346e-15	1.72872e-12	0.945205	0.121397	5.87103	0.282209	0.00323951	0.0144916	0.0188664	0.0188664	13.0599	12.3952	11.1274	4.81645	5.41811	3.85494
ENSMUSG00000110631	Gm42047	8.30845e-15	2.05655e-12	0.643915	0.0829489	7.022	0.132093	0.000973291	0.00865823	0.0093475	0.0093475	15.8652	17.4268	16.1178	9.85613	8.14741	7.61915
ENSMUSG00000020263	Appl2	9.21819e-15	2.25892e-12	-0.500178	0.0645424	8.38273	0.0797017	0.000278394	0.00553191	0.0059702	0.0059702	276.702	280.877	279.058	453.515	394.788	483.334
ENSMUSG00000026688	Mgst3	9.3887e-15	2.27792e-12	-0.566497	0.0731221	7.61369	0.102692	0.000498158	0.00752211	0.00729824	0.00752211	70.7843	62.8303	58.3368	103.065	107.452	119.002
ENSMUSG00000086040	Wipf3	1.14822e-14	2.73175e-12	-0.603497	0.0781563	7.33273	0.114603	0.00104187	0.00563342	0.00812076	0.00812076	10.1787	8.42374	9.5061	16.6445	17.9493	15.87
ENSMUSG00000021665	Hexb	1.14417e-14	2.73175e-12	0.552088	0.0714944	7.62581	0.0973547	0.000399264	0.00699382	0.0072679	0.0072679	92.2479	108.032	108.605	57.5991	53.4937	62.5918
ENSMUSG00000031960	Aars	1.21654e-14	2.86648e-12	0.608037	0.0788196	7.24831	0.118368	0.000242398	0.00907639	0.00841765	0.00907639	111.761	143.029	132.739	69.1862	70.8201	64.5201
ENSMUSG00000032036	Kirrel3	1.37762e-14	3.2151e-12	-0.484256	0.0629033	8.61753	0.0732478	0.000177185	0.00344364	0.00575805	0.00575805	53.9434	50.4317	45.3812	77.8627	82.2902	77.9867
ENSMUSG00000063632	Sox11	1.5951e-14	3.68754e-12	0.781963	0.101823	6.40535	0.195881	0.00178639	0.0137654	0.0131524	0.0137654	4.03422	4.84365	4.63968	1.787	1.96034	2.36248
ENSMUSG00000021091	Serpina3n	1.90746e-14	4.36843e-12	1.25489	0.163894	5.55467	0.504659	0.00388307	0.0364089	0.0240173	0.0364089	8.84148	8.02004	9.31255	2.00715	3.32524	2.16169
ENSMUSG00000024245	Tmem178	2.02959e-14	4.6051e-12	-0.505761	0.0661235	8.15331	0.0794828	0.000300808	0.00312978	0.00625766	0.00625766	69.4186	74.1259	63.9612	112.795	116.513	108.23
ENSMUSG00000044288	Cnr1	2.63723e-14	5.87503e-12	-0.48523	0.0637204	10.007	0.0740423	4.94451e-05	0.0042105	0.00604098	0.00604098	130.899	139.128	123.64	211.627	222.756	196.554
ENSMUSG00000090799	Klhl33	2.63431e-14	5.87503e-12	0.616592	0.0809694	7.03979	0.117541	0.000567328	0.00378966	0.00926674	0.00926674	32.7887	38.5015	35.148	18.8804	17.8831	19.5565
ENSMUSG00000001334	Fndc5	2.824e-14	6.23443e-12	-0.471398	0.0619759	8.81781	0.0701248	0.000123117	0.00420189	0.00563841	0.00563841	67.8685	79.222	69.0381	111.499	117.294	110.442
ENSMUSG00000017978	Cadps2	3.3216e-14	7.26748e-12	-0.481418	0.0634687	9.83963	0.0739295	0.000178408	0.00532219	0.005864	0.005864	156.694	159.48	140.483	220.213	258.331	255.418
ENSMUSG00000002100	Mybpc3	3.51938e-14	7.63207e-12	-1.19692	0.157954	8.41087	0.459723	0.000224397	0.0371999	0.00594053	0.0371999	26.5267	19.4555	15.7488	58.5049	69.5157	69.5703
ENSMUSG00000023020	Cox14	5.36396e-14	1.15302e-11	-0.61003	0.0810915	7.40644	0.119532	0.000567837	0.00929591	0.00788141	0.00929591	95.703	95.0942	80.6578	171.617	159.526	147.981
ENSMUSG00000034275	Igsf9b	5.42871e-14	1.15679e-11	-0.505311	0.0671852	7.92076	0.0812531	0.000133133	0.00568092	0.00663764	0.00663764	18.638	20.7872	19.4677	32.5267	34.0525	29.4734
ENSMUSG00000024621	Csf1r	6.28585e-14	1.32788e-11	0.536701	0.0715413	7.6652	0.0900441	0.000505149	0.00403184	0.00717208	0.00717208	22.012	21.3188	23.1104	12.308	13.9406	11.966
ENSMUSG00000030579	Tyrobp	9.59688e-14	2.01001e-11	1.03397	0.138856	5.56388	0.342444	0.0050747	0.0220685	0.023847	0.023847	42.9678	53.1311	51.4519	21.0268	14.4589	14.983
ENSMUSG00000074968	Ano3	1.11738e-13	2.32046e-11	-0.74481	0.100295	6.31773	0.17555	0.00119899	0.0102108	0.0138895	0.0138895	5.98386	7.01093	7.53997	14.1735	14.1821	15.6883
ENSMUSG00000025875	Tspan17	1.16677e-13	2.40265e-11	-0.68565	0.0923994	6.7708	0.151254	0.00216072	0.0106139	0.0106457	0.0106457	48.1236	46.219	48.7309	88.8272	78.4215	106.375
ENSMUSG00000038026	Kcnj9	1.2581e-13	2.56914e-11	-0.52121	0.0703338	7.98499	0.0874342	0.000254283	0.00716599	0.00652324	0.00716599	39.5117	34.3152	30.8726	56.0288	59.3366	57.0523
ENSMUSG00000023951	Vegfa	1.28071e-13	2.59371e-11	1.0562	0.142572	8.15745	0.359057	0.000591825	0.0298983	0.00625172	0.0298983	250.916	362.236	380.082	113.832	98.3607	118.828
ENSMUSG00000024587	Nars	1.29524e-13	2.60162e-11	0.768956	0.10382	9.64314	0.190322	6.34635e-05	0.0161043	0.00570979	0.0161043	294.14	379.66	392.504	150.746	163.356	168.55
ENSMUSG00000026202	Tuba4a	1.32633e-13	2.64242e-11	-0.589017	0.0795592	8.63797	0.111678	0.000216969	0.00927752	0.00574331	0.00927752	234.57	270.435	249.808	395.584	439.384	499.243
ENSMUSG00000033615	Cplx1	1.75639e-13	3.47099e-11	-0.450798	0.0611987	9.19969	0.0641035	5.88633e-05	0.0038635	0.00555905	0.00555905	255.127	215.188	225.78	346.934	359.857	358.91
ENSMUSG00000025425	St8sia5	1.83443e-13	3.59622e-11	-0.466989	0.0634467	8.50345	0.0700092	0.000187061	0.00554492	0.00585116	0.00585116	80.8205	88.9775	74.907	131.34	134.232	118.272
ENSMUSG00000029446	Psph	1.85085e-13	3.59961e-11	0.956636	0.129993	5.87989	0.294824	0.00527165	0.0200755	0.0187427	0.0200755	42.8148	60.7413	61.2186	22.5802	21.2696	17.9849
ENSMUSG00000024736	Tmem132a	1.88227e-13	3.6319e-11	-0.548282	0.0745262	9.73104	0.0968488	6.12311e-05	0.00826999	0.00577184	0.00826999	107.917	115.3	89.2497	169.095	182.337	177.499
ENSMUSG00000006435	Neurl1a	1.90632e-13	3.64956e-11	-0.614804	0.0835876	8.18563	0.12178	0.000319047	0.0101613	0.0062121	0.0101613	21.4368	23.7901	20.3826	41.515	43.6398	34.2786
ENSMUSG00000062591	Tubb4a	2.05799e-13	3.90939e-11	-0.516218	0.0702818	10.4582	0.0858718	2.63214e-05	0.00738298	0.00675317	0.00738298	389.558	424.634	473.631	690.676	752.875	676.397
ENSMUSG00000030717	Nupr1	2.52769e-13	4.7647e-11	1.47051	0.20096	5.39238	0.697181	0.00405665	0.0565206	0.0272192	0.0565206	34.4242	62.0076	61.9525	12.5426	9.6889	11.3498
ENSMUSG00000043897	Vmn2r2	2.7007e-13	5.05195e-11	-1.29974	0.177839	5.01527	0.544749	0.0106051	0.0368348	0.0358208	0.0368348	1.12463	1.02659	0.706654	3.18929	4.20041	2.92197
ENSMUSG00000023456	Tpi1	2.85799e-13	5.30568e-11	-0.449941	0.061628	8.82907	0.0642674	6.37095e-05	0.00435289	0.00563331	0.00563331	373.76	320.153	365.765	519.467	527.511	554.232
ENSMUSG00000038615	Nfe2l1	3.08753e-13	5.68871e-11	0.599666	0.0822528	9.29888	0.115998	0.000960872	0.00918741	0.00556987	0.00918741	161.564	175.018	181.673	95.0139	105.964	81.9302
ENSMUSG00000020684	Rasl10b	3.90249e-13	7.13661e-11	-0.465397	0.064114	8.46751	0.0681285	0.000281549	0.00365611	0.00588436	0.00588436	40.4219	36.235	34.1209	55.3076	59.9097	58.5121
ENSMUSG00000109511	Nup62	4.18758e-13	7.60124e-11	0.899232	0.124043	7.3728	0.261049	0.000914262	0.0221657	0.00798844	0.0221657	29.6027	40.5034	40.235	13.5528	16.5041	13.7131
ENSMUSG00000024521	Pmaip1	5.3706e-13	9.67695e-11	1.42794	0.197896	4.61446	0.641554	0.0121103	0.0252066	0.0466342	0.0466342	2.79337	4.3735	4.28916	0.970543	0.844191	0.821351
ENSMUSG00000035722	Abca7	1.68215e-12	3.00883e-10	-0.602029	0.0852903	7.82043	0.117461	0.000475979	0.0104357	0.00683158	0.0104357	7.94989	9.99206	8.64498	15.006	15.0083	17.7039
ENSMUSG00000029055	Plch2	1.77758e-12	3.15649e-10	-0.506102	0.0717784	9.01549	0.0830245	0.000374664	0.00735354	0.00557331	0.00735354	52.8675	47.5196	46.3584	72.4162	79.6279	90.16
ENSMUSG00000031661	Nkd1	2.10786e-12	3.71605e-10	0.592582	0.0843274	7.28019	0.113879	0.00182551	0.00884115	0.00830258	0.00884115	20.9429	23.422	21.7632	12.3285	13.4302	10.2594
ENSMUSG00000023067	Cdkn1a	2.45092e-12	4.28999e-10	1.17933	0.168329	7.45367	0.451246	0.000376377	0.0421257	0.00773723	0.0421257	87.1049	121.119	119.725	25.8037	32.7841	40.0292
ENSMUSG00000023393	Slc17a9	2.50968e-12	4.33097e-10	2.83695	0.405119	2.98312	2.51877	0.0488292	0.0815208	0.197353	0.197353	4.19048	5.11322	5.27581	0.185489	0.450758	0.306108
ENSMUSG00000024403	Atp6v1g2	2.50412e-12	4.33097e-10	-0.433051	0.0618373	8.88318	0.060516	0.000124641	0.00519541	0.00561113	0.00561113	251.925	202.425	223.411	340.382	347.015	332.581
ENSMUSG00000035504	Reep6	3.07955e-12	5.27723e-10	1.46325	0.209814	7.08272	0.69516	0.00185462	0.0641784	0.00907746	0.0641784	29.1602	53.1698	46.8608	8.0109	10.5642	11.1421
ENSMUSG00000026656	Fcgr2b	3.55068e-12	6.04232e-10	1.20388	0.17312	4.93253	0.449155	0.00710874	0.01084	0.0378471	0.0378471	8.09435	7.71233	7.35841	1.92813	2.76159	2.18009
ENSMUSG00000031070	Mrgprf	4.29638e-12	7.26088e-10	-0.642008	0.092681	6.67875	0.13396	0.00123258	0.0116521	0.0112006	0.0116521	9.50399	11.4973	9.45956	20.5792	19.7111	16.4334
ENSMUSG00000052253	Zfp622	5.01439e-12	8.41628e-10	0.557924	0.080798	7.40754	0.0988878	0.0019145	0.00496574	0.00787796	0.00787796	43.0237	44.9418	48.1016	27.8342	25.7724	22.8194
ENSMUSG00000046449	Nexmif	5.21715e-12	8.69702e-10	0.536832	0.0778069	7.24899	0.0921188	0.000665735	0.0064122	0.00841513	0.00841513	7.01872	7.16741	7.96607	3.9205	4.62855	4.22243
ENSMUSG00000031530	Dusp4	5.34758e-12	8.85422e-10	1.01944	0.14783	6.57673	0.338003	0.00172262	0.031058	0.0118724	0.031058	16.1789	14.2316	18.0184	5.06956	7.33685	4.93321
ENSMUSG00000018727	Cpsf4l	5.57991e-12	9.17688e-10	-1.07348	0.155803	5.26985	0.358901	0.00652985	0.00996418	0.0298818	0.0298818	3.43053	4.01175	4.64715	11.0545	12.6696	11.1504
ENSMUSG00000046441	Cmtr2	6.05293e-12	9.88848e-10	0.867945	0.126184	6.80231	0.245105	0.00152886	0.0223548	0.0104661	0.0223548	24.5612	30.9183	27.7763	9.2938	13.3082	11.8966
ENSMUSG00000102030	Gm29106	6.83776e-12	1.09516e-09	1.81351	0.264322	4.18657	1.07049	0.028212	0.076587	0.0638489	0.076587	1.57959	3.07728	2.45078	0.360927	0.487968	0.268687
ENSMUSG00000032021	Crtam	6.80605e-12	1.09516e-09	-0.932071	0.135837	8.13757	0.282769	0.000816665	0.026861	0.00628045	0.026861	15.3036	21.0413	18.2775	50.6372	48.8032	37.1345
ENSMUSG00000049336	Tenm2	6.75376e-12	1.09516e-09	0.737175	0.107416	6.24381	0.175279	0.00274751	0.0125666	0.0145599	0.0145599	13.2174	9.79794	11.1198	5.4258	5.90476	5.3605
ENSMUSG00000036298	Slc2a13	8.14659e-12	1.29631e-09	-0.648134	0.0948126	6.92581	0.136811	0.000383577	0.0131006	0.00980927	0.0131006	16.2979	16.1463	15.6267	29.7204	26.1043	32.0396
ENSMUSG00000022763	Aifm3	8.35709e-12	1.32123e-09	-0.855308	0.125186	8.83881	0.238271	0.000688688	0.0228187	0.00562902	0.0228187	96.2337	71.6269	71.6582	201.086	154.694	195.658
ENSMUSG00000029054	Gabrd	8.49277e-12	1.33407e-09	-0.520065	0.0761445	8.916	0.088098	0.000404496	0.00829249	0.00559959	0.00829249	115.511	124.42	100.945	189.626	171.174	201.128
ENSMUSG00000063524	Eno1	9.79112e-12	1.52823e-09	-0.432642	0.0635347	8.37196	0.0584081	7.31159e-05	0.00274484	0.00598187	0.00598187	324.989	359.635	382.464	539.584	543.049	497.639
ENSMUSG00000070304	Scn2b	9.91036e-12	1.53705e-09	-0.446024	0.0655166	9.44414	0.0648322	6.46555e-05	0.00637399	0.00560929	0.00637399	78.1933	85.4505	88.8077	128.313	141.086	118.471
ENSMUSG00000015243	Abca1	1.19104e-11	1.83563e-09	0.770819	0.113668	7.93228	0.193753	0.00167608	0.0177047	0.00661656	0.0177047	31.6207	28.2746	26.6449	12.0226	16.0631	11.7054
ENSMUSG00000024867	Pip5k1b	1.36004e-11	2.08298e-09	-0.59553	0.0880688	6.70122	0.112637	0.000573239	0.00722667	0.0110609	0.0110609	21.9253	25.7786	22.2628	41.4317	44.3072	38.3981
ENSMUSG00000113252	Gm33489	1.54014e-11	2.34417e-09	-1.38009	0.204638	4.83367	0.621648	0.00866757	0.0541475	0.0403764	0.0541475	5.97521	5.56679	6.00472	28.6891	15.226	26.7615
ENSMUSG00000050963	Kcns2	1.83459e-11	2.7751e-09	0.802604	0.11946	6.91801	0.210377	0.000902483	0.0205035	0.00984864	0.0205035	10.1751	12.6614	11.9364	4.21326	5.73572	5.45112
ENSMUSG00000049295	Zfp219	1.87693e-11	2.82173e-09	-0.545226	0.0811917	7.1036	0.0970918	0.000764667	0.00912346	0.00898819	0.00912346	63.5983	66.0103	52.7117	100.252	97.5016	107.034
ENSMUSG00000035226	Rims4	2.03107e-11	3.03484e-09	-0.413748	0.0617187	8.979	0.0530282	0.000132366	0.0019576	0.00558143	0.00558143	40.3198	41.073	38.7007	56.3241	63.0553	58.7188
ENSMUSG00000056216	Cebpg	2.15851e-11	3.20571e-09	0.883543	0.131973	6.95366	0.255095	0.000473702	0.0256516	0.00967114	0.0256516	50.0814	73.7352	72.5495	24.8383	27.9258	25.8402
ENSMUSG00000030669	Calca	2.23069e-11	3.27616e-09	2.05117	0.3066	3.5625	1.30356	0.0291676	0.0225411	0.111838	0.111838	9.94998	12.9788	15.0621	1.78516	1.74022	1.06287
ENSMUSG00000048281	Dleu7	2.23268e-11	3.27616e-09	1.66466	0.24883	4.35614	0.905623	0.0202794	0.0725949	0.0559272	0.0725949	5.93545	5.18585	7.0708	0.91175	0.835403	1.78573
ENSMUSG00000029385	Ccng2	2.36528e-11	3.42966e-09	-0.476204	0.0712721	7.67734	0.0713582	0.000476213	0.00368268	0.00714336	0.00714336	49.4938	49.8458	45.927	80.0237	80.0523	69.7661
ENSMUSG00000021062	Rab15	2.36334e-11	3.42966e-09	-0.547118	0.0818841	6.9832	0.0962586	0.000528896	0.00754266	0.00952862	0.00952862	58.1349	47.8869	46.8904	85.1544	91.6283	80.5343
ENSMUSG00000053398	Phgdh	2.43596e-11	3.51137e-09	0.730731	0.109437	6.91174	0.174562	0.000660989	0.0173038	0.00988049	0.0173038	122.389	169.269	140.711	59.7432	64.4306	64.7368
ENSMUSG00000021948	Prkcd	2.9863e-11	4.2795e-09	-0.466444	0.0701711	8.10085	0.0711798	0.000497442	0.00688853	0.00633526	0.00688853	51.7225	58.1512	45.3183	79.3223	80.9305	79.7116
ENSMUSG00000033909	Usp36	3.09133e-11	4.40425e-09	0.472247	0.0710985	7.82772	0.0724945	0.000765651	0.00622097	0.00681684	0.00681684	27.5507	33.9487	30.7459	18.8747	19.4528	17.7727
ENSMUSG00000047496	Rnf152	3.21804e-11	4.55827e-09	-0.764844	0.115253	8.83905	0.191436	0.00013868	0.0197861	0.00562892	0.0197861	27.9829	22.8209	19.4249	47.3294	54.4933	45.5672
ENSMUSG00000057440	Mpp7	3.65681e-11	5.15001e-09	-0.571945	0.0864311	7.37896	0.107101	0.00106543	0.0101401	0.00796854	0.0101401	20.4252	24.1398	20.2143	38.1206	41.4126	33.321
ENSMUSG00000020620	Abca8b	3.99666e-11	5.54303e-09	-0.485623	0.0735325	7.50249	0.0742395	0.000515135	0.00384798	0.00759541	0.00759541	10.3871	8.75737	9.02166	15.3473	15.474	14.1829
ENSMUSG00000037851	Iars	4.00374e-11	5.54303e-09	0.687104	0.104045	6.68089	0.154624	0.000606603	0.0156313	0.0111872	0.0156313	69.1093	82.1479	91.4891	39.9848	41.0933	33.2546
ENSMUSG00000041014	Nrg3	3.98227e-11	5.54303e-09	0.628981	0.0952319	6.60109	0.129568	0.00130242	0.0123012	0.0117062	0.0123012	15.0531	14.2408	14.6594	6.83923	9.20283	6.40804
ENSMUSG00000003031	Cdkn1b	4.14265e-11	5.70312e-09	0.41309	0.0626	8.75855	0.0554615	0.000210037	0.00512551	0.0056681	0.0056681	142.301	165.146	149.556	92.1126	99.3783	105.449
ENSMUSG00000026833	Olfm1	4.25574e-11	5.82608e-09	-0.420571	0.0637722	9.9854	0.0572169	8.46182e-05	0.00510659	0.00601572	0.00601572	265.92	284.31	251.564	363.349	423.973	414.401
ENSMUSG00000104282	Gm37460	4.32187e-11	5.88375e-09	1.25328	0.190104	4.7062	0.495783	0.0103275	0.0203852	0.0438817	0.0438817	4.10499	4.57911	4.59548	0.940081	1.45343	1.37999
ENSMUSG00000072568	Fam84b	4.56545e-11	6.18101e-09	0.809014	0.122867	6.32244	0.214467	0.00107377	0.0215707	0.0138483	0.0215707	9.054	13.2035	12.329	5.23791	4.97177	4.728
ENSMUSG00000035686	Thrsp	5.35122e-11	7.20503e-09	-0.505334	0.077023	7.4249	0.0837279	0.000624357	0.00827446	0.00782422	0.00827446	44.5041	40.562	35.0572	60.1411	67.3969	67.255
ENSMUSG00000027220	Syt13	5.65016e-11	7.56596e-09	-0.408531	0.0623453	8.76298	0.0519053	0.000164691	0.0021303	0.00566572	0.00566572	53.6887	46.9876	50.5514	75.0311	75.3389	73.1455
ENSMUSG00000010755	Cars	7.51813e-11	1.00126e-08	0.875677	0.134514	6.71989	0.251756	0.00167918	0.0254618	0.0109469	0.0254618	127.459	167.29	158.109	63.44	48.3576	67.4877
ENSMUSG00000050700	Emilin3	1.16432e-10	1.54225e-08	-1.41541	0.219651	5.18455	0.658913	0.00730757	0.0650623	0.0318378	0.0650623	1.16074	0.921794	0.550654	3.63185	3.53351	3.12932
ENSMUSG00000022369	Mtbp	1.21664e-10	1.60289e-08	1.27306	0.197765	5.22986	0.53314	0.0106797	0.0479869	0.0307939	0.0479869	7.29165	12.4588	11.6363	3.22547	2.93327	2.27934
ENSMUSG00000044681	Cnpy1	1.28209e-10	1.68008e-08	-0.467644	0.0727366	9.47569	0.0719559	9.24402e-05	0.00784347	0.0056216	0.00784347	222.181	209.278	197.528	322.91	295.059	371.66
ENSMUSG00000046157	Tmem229b	1.31307e-10	1.71153e-08	-0.450562	0.0701193	8.87619	0.0668019	0.000438145	0.00693693	0.00561378	0.00693693	57.9875	51.7723	51.8745	81.8432	92.7604	75.1651
ENSMUSG00000074570	Cass4	1.39216e-10	1.80502e-08	2.21983	0.345943	4.25765	1.62191	0.0334522	0.146063	0.0603063	0.146063	1.91301	2.43871	2.9653	0.306297	0.141374	0.392786
ENSMUSG00000036885	Arhgef26	1.72855e-10	2.22938e-08	-0.564163	0.0883755	7.08451	0.0981761	0.00264562	0.000719728	0.00906971	0.00906971	24.004	21.9905	21.3965	37.9476	41.7744	36.6888
ENSMUSG00000031824	6430548M08Rik	1.78709e-10	2.2928e-08	-0.410931	0.0644233	8.25504	0.0543843	0.000105569	0.00455076	0.00611998	0.00611998	63.5095	68.7513	66.0203	99.2573	105.86	88.9216
ENSMUSG00000037977	6430571L13Rik	2.01573e-10	2.57267e-08	-0.705866	0.110983	6.72402	0.164255	0.000832081	0.0176437	0.010922	0.0176437	16.6825	16.1376	12.5592	32.0593	31.7625	26.0227
ENSMUSG00000027273	Snap25	2.32654e-10	2.95399e-08	-0.494339	0.0779951	11.2566	0.0797127	1.28624e-05	0.00798901	0.00911198	0.00911198	1349.97	1485.08	1226.42	2099.16	2355.14	2067.34
ENSMUSG00000022241	Tars	2.40074e-10	3.03248e-08	0.604339	0.0954234	6.80616	0.120494	0.00220918	0.0114493	0.0104446	0.0114493	70.7477	84.632	80.6535	45.2835	35.5261	45.1753
ENSMUSG00000042429	Adora1	2.4368e-10	3.06224e-08	-0.389718	0.0615578	9.11433	0.0494673	0.000123931	0.00475504	0.00556011	0.00556011	60.1621	59.8855	59.7578	88.6977	94.7222	77.712
ENSMUSG00000027612	Mmp24	2.61507e-10	3.2695e-08	-0.388653	0.0614955	8.98413	0.0489604	9.23554e-05	0.00446391	0.00558018	0.00558018	94.4577	98.2833	84.2776	130.193	142.287	127.861
ENSMUSG00000020884	Asgr1	2.73582e-10	3.40311e-08	-0.923486	0.146282	5.5027	0.257926	0.00709604	-0.00449859	0.0250016	0.0250016	5.59309	5.92545	5.50335	13.4512	14.4181	13.4572
ENSMUSG00000028860	Sytl1	2.94538e-10	3.64528e-08	2.16686	0.343858	4.38318	1.55047	0.0700014	0.107356	0.0548191	0.107356	2.96366	4.89497	6.12324	0.28598	0.677228	0.619148
ENSMUSG00000092083	Kcnb2	2.96564e-10	3.65192e-08	0.900292	0.142891	6.82191	0.267659	0.000937972	0.0296886	0.010357	0.0296886	7.08221	6.62731	6.11938	2.02572	2.87481	3.19437
ENSMUSG00000025140	Pycr1	2.99303e-10	3.66721e-08	1.83095	0.290667	4.51453	1.1071	0.01128	0.115451	0.0499183	0.115451	12.1958	21.426	17.676	3.9039	2.49612	2.07457
ENSMUSG00000043873	Chil5	3.40619e-10	4.15267e-08	-1.05092	0.167368	5.66074	0.364942	0.00391822	0.0381	0.0221299	0.0381	9.43682	7.46294	6.18673	18.3975	19.6765	26.2018
ENSMUSG00000032193	Ldlr	3.578e-10	4.34054e-08	-0.521974	0.0832307	6.95123	0.0850759	0.000707996	0.00346561	0.00968304	0.00968304	10.3382	8.65129	9.40382	16.2823	15.1508	15.4576
ENSMUSG00000027581	Stmn3	3.66429e-10	4.42332e-08	-0.386642	0.0616881	9.51905	0.0478999	6.74106e-05	0.00374789	0.00564072	0.00564072	473.685	425.276	429.41	609.14	610.058	668.118
ENSMUSG00000007030	Vwa7	4.05021e-10	4.86522e-08	-1.85952	0.297424	5.50245	1.1435	0.00687258	0.125819	0.0250064	0.125819	0.450729	0.785777	1.18067	5.62825	4.74819	3.92857
ENSMUSG00000023019	Gpd1	4.39535e-10	5.25405e-08	-0.582871	0.0934192	8.04748	0.112394	0.000213435	0.0128773	0.00641897	0.0128773	52.4497	61.9297	62.8663	107.485	114.003	89.7966
ENSMUSG00000042182	Bend6	4.65873e-10	5.54186e-08	-0.483609	0.0776236	8.62511	0.0773939	0.000223687	0.00881444	0.00575252	0.00881444	143.581	111.523	137.109	200.517	204.688	214.208
ENSMUSG00000019874	Fabp7	5.01526e-10	5.93715e-08	-0.659175	0.106	7.70395	0.143837	0.000505511	0.0163485	0.00708173	0.0163485	96.0873	129.38	119.562	237.13	217.977	192.985
ENSMUSG00000020140	Lgr5	5.04038e-10	5.9382e-08	0.581798	0.0935691	6.63966	0.108605	0.00168205	0.00714133	0.0114507	0.0114507	17.9546	13.9778	16.9586	8.90083	8.55117	9.44554
ENSMUSG00000049907	Rasl11b	5.48605e-10	6.43233e-08	-0.626343	0.100949	6.8906	0.129921	0.000978618	0.0143075	0.00998921	0.0143075	15.4605	20.8847	19.8801	32.7078	33.0294	36.4637
ENSMUSG00000028601	Echdc2	5.72137e-10	6.6763e-08	-0.682964	0.110192	6.08821	0.14704	0.00207179	0.00681358	0.0161418	0.0161418	20.9638	23.6704	20.3061	44.2606	37.798	41.5091
ENSMUSG00000073418	C4b	6.11637e-10	7.1034e-08	1.24123	0.200606	4.86887	0.510489	0.00341211	0.0569523	0.0394599	0.0569523	16.785	17.0767	13.7659	3.15068	5.82409	4.77636
ENSMUSG00000041598	Cdc42ep4	6.33105e-10	7.31803e-08	-0.477853	0.077298	8.07865	0.0756731	0.000276266	0.00868621	0.00636949	0.00868621	42.1525	51.6256	49.4321	74.3524	81.5292	69.2841
ENSMUSG00000055489	Ano5	6.77927e-10	7.79934e-08	1.08455	0.175745	4.86289	0.372618	0.00671492	0.0179663	0.0396143	0.0396143	2.90692	2.57456	3.08619	0.85476	1.18495	0.753545
ENSMUSG00000036093	Arl5a	6.94143e-10	7.94858e-08	-0.389753	0.0631956	8.5878	0.0502497	0.000209982	0.00563668	0.00578054	0.00578054	70.6675	75.006	80.5634	103.068	118.846	106.493
ENSMUSG00000007682	Dio2	7.45004e-10	8.49131e-08	-0.537365	0.0872881	7.8619	0.0957714	0.000440838	0.010988	0.00674912	0.010988	16.7421	12.5095	14.4741	24.6659	22.7712	25.8287
ENSMUSG00000029088	Kcnip4	7.81568e-10	8.86682e-08	-0.392156	0.0637794	8.44061	0.0478344	0.000191284	0.00193184	0.00591044	0.00591044	89.522	89.9889	97.1893	138.317	136.227	128.56
ENSMUSG00000074252	Gm10654	8.11726e-10	9.16652e-08	1.03657	0.168751	4.99409	0.35455	0.00638219	0.0338756	0.036333	0.036333	7.29891	5.34931	4.61047	1.96745	2.30534	1.64213
ENSMUSG00000030124	Lag3	8.48788e-10	9.54108e-08	1.14228	0.186175	4.70686	0.413709	0.00812906	0.0197025	0.0438628	0.0438628	5.15035	8.14635	6.14206	1.97398	1.88637	2.05898
ENSMUSG00000050822	Slc29a4	8.61154e-10	9.63588e-08	-0.56997	0.0929315	7.60452	0.107823	0.00364245	0.00931195	0.00732142	0.00931195	37.4291	29.7221	38.1986	57.8816	65.7355	58.5963
ENSMUSG00000027257	Pacsin3	8.67303e-10	9.66057e-08	-0.514716	0.0839381	7.10963	0.0824399	0.00160565	0.00209432	0.00896276	0.00896276	71.1848	69.3753	68.7539	113.018	104.649	118.38
ENSMUSG00000038843	Gcnt1	8.84857e-10	9.8115e-08	-1.33752	0.218232	6.12241	0.593839	0.0034695	0.0679681	0.0157698	0.0679681	1.51634	2.73868	2.72784	8.23049	7.37861	9.96598
ENSMUSG00000039470	Zdhhc2	9.12921e-10	1.00771e-07	-0.48428	0.0790799	7.24337	0.0772514	0.000944645	0.00767196	0.0084358	0.0084358	29.0923	36.4362	36.1629	54.097	54.6467	52.0472
ENSMUSG00000028370	Pappa	9.25267e-10	1.01676e-07	-1.7928	0.292856	5.26733	1.06716	0.00732859	0.121318	0.0299386	0.121318	0.329381	0.248037	0.256684	2.17093	0.931003	2.19283
ENSMUSG00000038508	Gdf15	9.47167e-10	1.03618e-07	4.93144	0.806046	4.24594	8.07539	0.125752	0.848813	0.0608661	0.848813	14.3626	35.5511	18.7409	0.540716	0.148298	0.0269089
ENSMUSG00000074782	4833422C13Rik	9.63521e-10	1.04938e-07	0.62413	0.10206	6.32757	0.11884	0.00182061	0.000652421	0.0138037	0.0138037	16.5799	17.7369	16.848	8.71031	8.61693	9.64684
ENSMUSG00000031962	Cdh15	9.68912e-10	1.05058e-07	-0.643589	0.105257	7.3998	0.137557	0.000534663	0.0160839	0.00790223	0.0160839	10.0489	14.1604	11.4077	22.0929	23.1683	20.7188
ENSMUSG00000043670	Diras1	9.80784e-10	1.05877e-07	-0.455828	0.0745729	7.6952	0.069007	0.00030384	0.00803785	0.0071018	0.00803785	39.9016	32.8198	32.1494	50.6486	54.5468	55.9141
ENSMUSG00000025868	Higd2a	1.04351e-09	1.12155e-07	-0.447568	0.0733405	7.55779	0.0653523	0.00062497	0.00594645	0.00744327	0.00744327	151.835	124.4	142.684	218.76	202.519	207.635
ENSMUSG00000025591	Tma16	1.05657e-09	1.13063e-07	0.615639	0.100914	6.35432	0.118999	0.00170111	0.00491821	0.0135744	0.0135744	12.9666	13.9045	14.0538	6.43267	7.64327	7.69913
ENSMUSG00000055629	B4galnt4	1.08489e-09	1.15588e-07	0.544812	0.0893663	6.81771	0.094751	0.0015993	0.00553183	0.0103802	0.0103802	60.0744	67.6094	74.6825	36.7525	36.6829	40.4134
ENSMUSG00000024601	Isoc1	1.27658e-09	1.35423e-07	0.475043	0.0782567	7.23255	0.0731628	0.000710275	0.00611845	0.0084759	0.0084759	30.2621	28.2641	34.5838	18.2374	19.7054	18.8794
ENSMUSG00000060371	Caln1	1.29433e-09	1.36714e-07	-0.613126	0.101041	8.48388	0.125028	0.000366642	0.0149472	0.00586901	0.0149472	86.5167	78.6474	70.6309	150.3	159.401	120.044
ENSMUSG00000025867	Cplx2	1.36497e-09	1.43556e-07	-0.488792	0.0806647	10.2719	0.0794835	3.28113e-05	0.00972737	0.00641469	0.00972737	161.678	142.774	136.528	235.04	264.405	206.568
ENSMUSG00000040747	Cd53	1.42082e-09	1.48792e-07	1.12636	0.18608	5.12479	0.422156	0.0072064	0.044732	0.0332256	0.044732	7.89759	8.75986	8.7449	3.85183	2.33258	2.14818
ENSMUSG00000015745	Plekho1	1.45645e-09	1.51617e-07	-0.624316	0.103208	6.90038	0.129713	0.00194009	0.0140377	0.00993868	0.0140377	46.6244	45.3184	41.0193	66.8474	86.8652	89.9926
ENSMUSG00000018340	Anxa6	1.46636e-09	1.51617e-07	-0.429076	0.0709449	8.5598	0.0612718	0.000178877	0.00737089	0.00580286	0.00737089	56.641	69.5289	64.2412	92.2106	101.235	92.4557
ENSMUSG00000007039	Ddah2	1.46157e-09	1.51617e-07	-0.53697	0.0887767	7.18528	0.0959586	0.000920563	0.0109014	0.00865619	0.0109014	50.6206	43.1484	37.6352	72.4241	73.011	71.6417
ENSMUSG00000004347	Pde1c	1.48692e-09	1.53096e-07	-0.791146	0.130859	7.57477	0.208323	0.000462904	0.0252233	0.00739828	0.0252233	13.4823	18.9377	18.9109	38.8873	33.2032	38.5946
ENSMUSG00000002820	Atg4d	1.58284e-09	1.62291e-07	-0.54658	0.0905579	6.85303	0.0923005	0.00211355	0.0012311	0.0101876	0.0101876	26.6173	25.313	24.9611	46.31	39.933	43.6245
ENSMUSG00000015837	Sqstm1	1.97667e-09	2.01826e-07	0.380175	0.0633656	8.48328	0.0453904	0.000153232	0.00238487	0.00586956	0.00586956	294.48	307.447	283.909	192.826	204.146	196.765
ENSMUSG00000004815	Dgkq	2.17427e-09	2.2108e-07	-0.423203	0.0707198	8.29559	0.0573668	0.00143225	0.00311343	0.00606969	0.00606969	26.7229	23.9911	23.0908	39.4344	34.2561	37.3781
ENSMUSG00000030695	Aldoa	2.28088e-09	2.30963e-07	-0.373093	0.0624275	9.77811	0.0429209	3.61348e-05	0.00141556	0.00580966	0.00580966	687.156	713.671	759.655	1013.51	1060.11	991.087
ENSMUSG00000074656	Eif2s2	2.31166e-09	2.33116e-07	0.528113	0.0883984	8.81402	0.0930482	0.000163584	0.0115578	0.00564017	0.0115578	141.505	177.986	175.654	91.6527	91.3321	102.583
ENSMUSG00000033967	Rnf225	2.354e-09	2.36413e-07	1.02808	0.172171	5.69162	0.352658	0.00406427	0.0404001	0.0216111	0.0404001	4.60243	6.29107	6.39064	1.57556	2.47548	2.06191
ENSMUSG00000027489	Necab3	2.38492e-09	2.38541e-07	-0.766004	0.128327	6.47766	0.19579	0.000972975	0.0237288	0.0125876	0.0237288	57.2867	53.2889	56.8968	101.814	98.1123	144.584
ENSMUSG00000070570	Slc17a7	2.66625e-09	2.65595e-07	-0.457815	0.0769316	9.91537	0.0699804	4.6445e-05	0.00883127	0.00593873	0.00883127	185.25	230.836	190.506	320.469	327.918	289.361
ENSMUSG00000015342	Xk	2.81755e-09	2.79531e-07	-0.729201	0.122722	7.7599	0.177593	0.000491727	0.0220994	0.00695792	0.0220994	13.3359	17.7182	13.1563	29.693	33.7367	26.5228
ENSMUSG00000035305	Ror1	3.0128e-09	2.97696e-07	-1.26067	0.21256	5.54765	0.531008	0.00388174	0.0638912	0.024148	0.0638912	1.23244	0.942239	0.72557	4.06463	3.60716	2.43969
ENSMUSG00000039126	Prune2	3.05695e-09	3.00846e-07	-0.377647	0.0637002	8.459	0.044769	0.000194068	0.00228568	0.0058925	0.0058925	98.6687	87.9831	95.8934	134.601	141.168	128.149
ENSMUSG00000070327	Rnf213	3.36751e-09	3.30084e-07	1.08898	0.184179	8.1258	0.396469	0.00275638	0.0481267	0.00629779	0.0481267	9.66804	14.6811	12.8099	4.03352	5.08157	3.23694
ENSMUSG00000056091	St3gal5	3.53406e-09	3.45029e-07	-0.411267	0.0696514	8.09633	0.0565637	0.000256107	0.00702087	0.00634216	0.00702087	83.3356	86.7476	76.6889	118.216	136.092	113.964
ENSMUSG00000028708	Mknk1	3.96022e-09	3.851e-07	0.825984	0.140334	6.52204	0.228307	0.00174994	0.0277905	0.0122592	0.0277905	61.6186	92.927	94.1581	34.5432	33.0395	35.9667
ENSMUSG00000038717	Atp5l	3.985e-09	3.85978e-07	-0.372196	0.0632469	8.57442	0.0432084	0.00020919	0.00185255	0.00579106	0.00579106	568.547	583.125	541.898	778.55	782.962	861.008
ENSMUSG00000045094	Arhgef37	4.24717e-09	4.09752e-07	-0.518946	0.0883422	6.76282	0.0892445	0.00101446	0.00955187	0.0106921	0.0106921	8.42795	7.00288	6.24277	12.0774	11.987	11.383
ENSMUSG00000064360	mt-Nd3	4.48277e-09	4.30785e-07	-0.425914	0.0726157	10.0784	0.0584636	0.0017795	0.00327401	0.00613006	0.00613006	6629.07	5596.8	6238.45	8755.51	9044.81	9589.81
ENSMUSG00000034701	Neurod1	5.13882e-09	4.89987e-07	-0.433858	0.0742575	9.93164	0.0630869	4.96527e-05	0.00822162	0.00595594	0.00822162	289.119	297.038	279.965	381.188	452.111	486.721
ENSMUSG00000093989	Rnasek	5.12117e-09	4.89987e-07	-0.39517	0.0676293	8.00806	0.0492905	0.000376626	0.00267663	0.00648395	0.00648395	263.924	234.845	242.96	368.744	364.141	329.479
ENSMUSG00000055805	Fmnl1	5.48814e-09	5.21267e-07	-0.440551	0.0755448	8.24834	0.0622988	0.00243199	0.00265961	0.00612853	0.00612853	40.2092	37.3327	34.874	62.6688	55.28	53.5229
ENSMUSG00000096847	Tmem151b	5.54509e-09	5.24642e-07	-0.536543	0.0920325	9.0318	0.0965275	0.000131163	0.0125738	0.00557024	0.0125738	47.1307	45.6072	36.2222	69.3468	78.997	67.1041
ENSMUSG00000045932	Ifit2	5.5896e-09	5.2682e-07	0.812281	0.139361	5.52358	0.199419	0.00453087	-0.00268205	0.0246015	0.0246015	7.23773	7.77111	7.8712	3.26483	3.23479	3.43906
ENSMUSG00000023992	Trem2	5.61851e-09	5.27515e-07	1.01043	0.173383	5.36358	0.342364	0.00791173	0.0371807	0.0278262	0.0371807	10.6203	16.6997	13.4194	3.85927	4.79525	5.73251
[truncated: 24,244 more rows]

## Sheet: Gtpbp1_vs_NMF205 DE gene
target_id	ext_gene	pval	qval	b	se_b	mean_obs	var_obs	tech_var	sigma_sq	smooth_sigma_sq	final_sigma_sq	J_BP1_1	J_BP1_2	J_BP1_3	NMF205_1	NMF205_2	NMF205_3
[truncated: 24,802 more rows]
