# Supplementary material for: GTPBP1 resolves paused ribosomes to maintain neuronal homeostasis
Source: eLife. 2020 Nov 13;9:e62731. doi: 10.7554/eLife.62731 (PMC7665888; doi:10.7554/eLife.62731)
Supplement: Supplementary file 3. [file elife-62731-supp3.xlsx]

## Sheet: TE_Gtpbp1 
gene_id	external_gene_name	baseMean	log2FoldChange	lfcSE	stat	pvalue	padj	log2_wtJ_1_TE	log2_wtJ_2_TE	log2_wtJ_3_TE	log2_J_BP1_1_TE	log2_J_BP1_2_TE	log2_J_BP1_3_TE
ENSMUSG00000032575.16	Manf	903.606	0.919554	0.19431	-4.7324	2.21875e-06	0.0021649	1.21481	0.915752	0.653019	1.87957	1.42705	1.93498
ENSMUSG00000044533.15	Rps2	1132.47	0.0904053	0.178319	-0.506986	0.612165	0.917203	-0.784928	-0.848023	-0.691619	-0.732477	-0.974366	-0.635375
ENSMUSG00000047215.14	Rpl9	1415.81	-0.162172	0.284686	0.569654	0.568912	0.904155	-0.97357	-0.493002	-1.35223	-0.87588	-1.36673	-1.32489
ENSMUSG00000061477.4	Rps7	1464.56	0.127653	0.217266	-0.587544	0.556838	0.898476	-0.69408	-0.608447	-1.04175	-0.625713	-1.06866	-0.583069
ENSMUSG00000037235.13	Mxd4	1118.57	1.06007	0.281454	-3.7664	0.00016562	0.0362927	-1.51955	-2.13994	-1.52882	-0.950833	-0.965761	-0.402003
ENSMUSG00000030744.13	Rps3	2539.2	0.342177	0.215667	-1.5866	0.112604	0.578393	0.451869	0.0308549	0.262012	0.727889	0.218287	0.531327
ENSMUSG00000071637.5	Cebpd	112.169	2.55894	0.574685	-4.45277	8.47702e-06	0.00505264	1.35318	0.193929	2.0562	3.92792	3.4658	3.96044
ENSMUSG00000003970.9	Rpl8	2686.89	0.418082	0.285573	-1.46401	0.143192	0.619722	0.469152	-0.143733	0.660165	0.826759	0.575066	0.669459
ENSMUSG00000039960.5	Rhou	509.278	0.949215	0.209123	-4.53903	5.65124e-06	0.00382769	-1.45471	-1.81717	-1.46421	-0.790551	-0.783325	-0.566681
ENSMUSG00000012848.15	Rps5	2020.56	0.110977	0.175421	-0.632632	0.526974	0.889493	1.3282	1.30216	1.13461	1.11985	1.28305	1.42206
ENSMUSG00000037936.15	Scarb1	207.874	1.00836	0.323092	-3.12098	0.00180251	0.131663	0.486791	-0.243863	0.82129	1.75227	1.06472	1.23985
ENSMUSG00000057113.13	Npm1	1751.48	-0.212462	0.301522	0.704633	0.481038	0.870197	-0.218314	-0.59544	-0.943955	-0.358901	-1.03099	-1.4278
ENSMUSG00000019846.11	Lama4	445.258	0.953812	0.283563	-3.36367	0.000769139	0.0881611	0.537608	0.883851	1.20901	2.25192	1.55645	1.33265
ENSMUSG00000048489.12	Depp1	23.9094	3.12632	0.929411	-3.36377	0.000768865	0.0881611	1.03021	-2.8787	-0.41557	2.60292	4.32271	1.3199
ENSMUSG00000032998.16	Foxj3	1076.91	-0.710424	0.15042	4.72294	2.32457e-06	0.0021649	-0.0686215	-0.282488	-0.244036	-0.899009	-0.889071	-1.23004
ENSMUSG00000074129.14	Rpl13a	90.559	-1.13694	0.630032	1.80458	0.0711408	0.500129	-3.38851	-2.22488	-3.70518	-3.15144	-5.55436	-4.38107
ENSMUSG00000034892.8	Rps29	987.387	0.81121	0.177733	-4.5642	5.01413e-06	0.00382769	0.422649	0.187048	0.367162	1.05818	0.740268	1.35195
ENSMUSG00000029614.13	Rpl6	1638.65	0.259887	0.359745	-0.722419	0.470037	0.86695	-1.26712	-2.04662	-1.2082	-0.802053	-1.5457	-1.66097
ENSMUSG00000022283.15	Pabpc1	1484.46	-0.233242	0.307823	0.757714	0.448622	0.85907	-0.870279	-0.904738	-1.18787	-0.796742	-1.20679	-2.14917
ENSMUSG00000025739.13	Gng13	7412.52	0.685329	0.228278	-3.00217	0.0026806	0.158499	3.1358	2.55785	3.10341	3.33844	3.75822	3.56278
ENSMUSG00000048758.14	Rpl29	780.478	-0.310999	0.330181	0.941902	0.346243	0.805899	-0.209832	0.0790519	-1.09501	-0.626983	-0.862957	-0.742842
ENSMUSG00000035569.17	Ankrd11	2609.5	-0.835821	0.235286	3.55236	0.000381791	0.0573109	-1.28755	-1.12857	-1.74149	-2.36985	-2.22928	-2.26939
ENSMUSG00000059974.10	Ntm	4817.2	0.394089	0.131737	-2.99149	0.0027762	0.158499	0.09075	-0.125137	-0.240521	0.099468	0.337377	0.188499
ENSMUSG00000031297.14	Slc7a3	1415.26	-1.00021	0.288639	3.46527	0.000529699	0.0711085	1.09488	1.80987	1.61169	0.639311	0.114586	0.511551
ENSMUSG00000019861.15	Gopc	1118.59	-0.680132	0.137588	4.94325	7.68306e-07	0.000924272	-0.320887	-0.211033	-0.530545	-1.19372	-0.990271	-1.22053
ENSMUSG00000032727.14	Mier3	529.404	-0.709704	0.236788	2.99721	0.00272465	0.158499	-0.160978	0.162086	-0.905075	-0.985309	-1.10875	-1.13816
ENSMUSG00000062232.14	Rapgef2	1023.58	-0.841183	0.199637	4.21357	2.5137e-05	0.0105296	0.205978	0.504422	0.172779	-0.78473	-0.556589	-0.558823
ENSMUSG00000003282.9	Plag1	40.2544	-3.91929	1.02192	3.83522	0.00012545	0.0292082	-3.99327	0.153824	-1.28018	-3.85349	#NAME?	-5.20922
ENSMUSG00000027009.18	Itga4	205.844	1.26544	0.41559	-3.04493	0.00232738	0.148448	-1.41855	-1.37067	-1.83625	0.276451	-0.401932	-1.37478
ENSMUSG00000017404.12	Rpl19	1602.93	0.418124	0.204091	-2.04872	0.0404897	0.409437	-0.574644	-0.847881	-0.784778	-0.206598	-0.605921	-0.453799
ENSMUSG00000063316.13	Rpl27	874.796	0.577324	0.259392	-2.22569	0.0260352	0.35112	-0.0649113	-0.551464	-0.155431	0.440235	0.227249	0.0290466
ENSMUSG00000020032.14	Nuak1	1084.87	-1.03079	0.281031	3.6679	0.000244552	0.0461275	-1.1641	-0.583323	-0.936449	-2.03649	-2.16505	-1.78688
ENSMUSG00000046364.14	Rpl27a	1134.66	0.456566	0.185353	-2.46323	0.0137693	0.275178	-0.599438	-0.180285	-0.913271	-0.185216	-0.443766	0.0493746
ENSMUSG00000031320.9	Rps4x	1494.19	0.0943868	0.203048	-0.46485	0.642039	0.926903	-1.4851	-1.51956	-1.67139	-1.34126	-1.67641	-1.71004
ENSMUSG00000028657.14	Ppt1	2027.7	0.542323	0.14888	-3.6427	0.000269793	0.0472963	0.172432	0.381296	0.281236	0.59423	0.610376	0.97593
ENSMUSG00000030057.15	Cnbp	4582.41	-0.623708	0.144119	4.32773	1.50654e-05	0.00701528	0.578966	0.66094	0.167365	-0.147803	-0.341488	-0.258496
ENSMUSG00000030525.8	Chrna7	230.403	-1.05398	0.339942	3.10047	0.00193215	0.135169	2.43833	2.79631	2.25503	0.775969	1.47566	1.68305
ENSMUSG00000014550.14	Rbsn	769.347	-0.816725	0.185785	4.39607	1.10227e-05	0.00608331	-1.40836	-1.21725	-1.34459	-2.19991	-2.21223	-2.27605
ENSMUSG00000060743.12	H3f3a	1671.75	0.798315	0.267654	-2.98264	0.00285776	0.160692	-0.847435	-0.636372	-0.292794	0.24917	-0.00148147	0.210994
ENSMUSG00000032518.6	Rpsa	1857.42	0.232576	0.218275	-1.06552	0.286642	0.764318	-2.37648	-2.72396	-2.50165	-2.2628	-2.65064	-2.24725
ENSMUSG00000032883.15	Acsl3	3179.87	0.458582	0.153496	-2.98759	0.00281191	0.159317	0.570131	0.466396	-0.10478	0.622105	0.644717	0.768688
ENSMUSG00000037805.15	Rpl10a	721.466	0.585924	0.22544	-2.59902	0.0093491	0.235573	-0.571056	-1.04827	-0.530047	-0.175651	-0.397049	-0.0206043
ENSMUSG00000026492.11	Tfb2m	189.875	-1.12042	0.33614	3.3332	0.000858545	0.0905375	-2.04515	-1.17285	-2.01403	-2.79647	-3.54459	-2.4835
ENSMUSG00000043716.13	Rpl7	1810.62	-0.141523	0.277475	0.510039	0.610024	0.91623	-1.14574	-0.959702	-1.1801	-0.879124	-1.52066	-1.76208
ENSMUSG00000000088.7	Cox5a	3424.25	0.611492	0.196932	-3.1051	0.00190216	0.13388	2.9462	2.69579	2.52005	3.33852	3.32836	2.9878
ENSMUSG00000019894.14	Slc6a15	1388.96	-0.707795	0.236064	2.99832	0.00271475	0.158499	-0.00261056	0.138295	-0.211567	-0.766876	-0.674828	-1.00205
ENSMUSG00000007039.12	Ddah2	611.793	0.591398	0.190251	-3.10852	0.0018803	0.13388	0.0404164	0.0996302	0.0790449	0.460523	0.363237	0.875368
ENSMUSG00000003435.9	Supt5	1903.74	-0.514992	0.17224	2.98996	0.0027901	0.158684	0.254004	0.0688821	0.0816268	-0.206512	-0.580028	-0.664037
ENSMUSG00000067274.10	Rplp0	1858.13	-0.184288	0.170357	1.08178	0.279352	0.760436	-0.948853	-0.852383	-0.839651	-1.28361	-1.35976	-0.849748
ENSMUSG00000037563.15	Rps16	713.24	0.723606	0.223639	-3.23559	0.0012139	0.108313	-0.663362	-0.293031	0.00464056	0.389333	0.147067	0.436968
ENSMUSG00000034994.10	Eef2	13562.9	0.171849	0.157266	-1.09273	0.274513	0.757346	-0.284259	-0.250383	0.0318962	-0.166767	-0.201422	0.0980494
ENSMUSG00000030432.12	Rpl28	1129.44	0.260071	0.20838	-1.24807	0.212007	0.698942	-0.0142717	0.628834	0.234317	0.458086	0.426622	0.52329
ENSMUSG00000008668.15	Rps18	886.501	0.790163	0.266137	-2.96901	0.00298765	0.163595	-2.07375	-1.56009	-1.12876	-0.984306	-1.06341	-0.483795
ENSMUSG00000063457.14	Rps15	1391.84	0.365574	0.238177	-1.53488	0.124812	0.596573	0.682993	0.12477	0.213307	0.726889	0.360759	0.79471
ENSMUSG00000060036.14	Rpl3	2640.57	0.090602	0.202983	-0.446353	0.655342	0.93001	-1.53901	-1.78678	-1.59527	-1.57003	-1.84329	-1.5138
ENSMUSG00000058600.13	Rpl30	845.9	0.115306	0.275679	-0.418263	0.675755	0.936256	0.0806645	-0.188447	0.163978	0.32913	-0.143432	-0.146583
ENSMUSG00000028936.15	Rpl22	876.371	0.0699058	0.231115	-0.302472	0.762292	0.955034	-0.678617	-0.220032	-1.08808	-0.516561	-0.942379	-0.56528
ENSMUSG00000003429.11	Rps11	1260.98	-0.00589328	0.231952	0.0254073	0.97973	0.995726	0.750635	0.841681	0.801937	0.725129	0.323531	0.981096
ENSMUSG00000057863.6	Rpl36	542.194	1.05309	0.369479	-2.8502	0.00436912	0.178936	-0.642834	-0.807322	0.371305	0.870156	0.364954	0.828488
ENSMUSG00000028234.6	Rps20	475.029	0.591567	0.21976	-2.69188	0.00710501	0.210063	-1.08367	-0.783473	-0.785269	-0.502539	-0.663295	0.0402283
ENSMUSG00000062997.6	Rpl35	619.729	1.02594	0.383977	-2.67189	0.00754254	0.215309	-0.12624	-0.597579	-0.215056	1.30104	0.320183	0.0125946
ENSMUSG00000073702.11	Rpl31	960.142	0.594783	0.245986	-2.41795	0.0156083	0.287845	-0.164123	-0.0588253	-0.369509	0.551273	-0.234286	0.491167
ENSMUSG00000025967.16	Eef1b2	1527.55	0.491259	0.207341	-2.36933	0.0178203	0.306628	0.365395	0.309822	0.5313	0.86207	0.603546	0.981941
ENSMUSG00000009927.9	Rps25	1010.65	0.379674	0.18423	-2.06087	0.0393153	0.40698	-0.556285	-0.770633	-0.723491	-0.232689	-0.583125	-0.375162
ENSMUSG00000052146.16	Rps10	29.3762	-2.03008	0.989225	2.05219	0.0401512	0.40858	-1.65915	-1.19677	#NAME?	#NAME?	-4.12837	-3.46274
ENSMUSG00000098274.7	Rpl24	600.137	-0.610244	0.30978	1.96993	0.0488465	0.444903	6.60581	5.74325	5.92669	5.79343	4.98812	5.22798
ENSMUSG00000071415.6	Rpl23	1034.08	0.521482	0.286772	-1.81845	0.0689948	0.494772	-0.236847	-0.898484	-0.748653	0.0532061	-0.234565	-0.420882
ENSMUSG00000040952.16	Rps19	770.975	0.374061	0.213345	-1.75332	0.0795476	0.518975	-0.39122	-0.0150186	-0.0920644	0.156212	-0.253368	0.42248
ENSMUSG00000008682.13	Rpl10	955.285	0.453347	0.265612	-1.7068	0.0878587	0.533482	-1.81571	-1.91138	-1.62642	-1.4512	-1.99779	-0.873717
ENSMUSG00000059291.15	Rpl11	1025.57	0.446884	0.274803	-1.6262	0.103908	0.565496	-0.750556	-1.02702	-0.811091	-0.384758	-1.04168	-0.162607
ENSMUSG00000090733.6	Rps27	576.037	0.41946	0.26757	-1.56767	0.116959	0.585272	0.386519	0.327067	-0.389763	0.715802	0.0734497	0.488141
ENSMUSG00000007892.8	Rplp1	1545.95	0.524709	0.360703	-1.45468	0.145757	0.62329	-0.484287	-0.827905	0.407555	0.00922722	0.0380818	0.641632
ENSMUSG00000079435.9	Rpl36a	392.017	0.399816	0.280417	-1.42579	0.153928	0.634846	0.0136531	-0.134151	-0.671645	0.432083	-0.515404	0.155715
ENSMUSG00000039001.12	Rps21	1247.96	0.449235	0.339996	-1.3213	0.186403	0.669392	2.06257	2.2375	1.45219	1.91051	1.68152	3.15172
ENSMUSG00000041453.12	Rpl21	1183	0.279084	0.223154	-1.25063	0.211068	0.698606	-0.973329	-1.43693	-0.859133	-0.812105	-1.05	-0.745349
ENSMUSG00000012405.16	Rpl15	986.589	-0.291284	0.263077	1.10722	0.268199	0.751595	-1.58095	-1.15464	-2.0148	-1.99254	-2.32543	-1.55797
ENSMUSG00000090862.3	Rps13	964.686	0.236811	0.221278	-1.0702	0.284531	0.76269	0.161312	0.384684	0.212436	0.603668	0.0740922	0.460809
ENSMUSG00000060636.14	Rpl35a	736.505	0.225051	0.283881	-0.792766	0.427914	0.848206	0.298798	0.285737	-0.605622	0.377995	-0.0866417	0.180355
ENSMUSG00000079641.3	Rpl39	412.837	0.25284	0.378761	-0.667546	0.504424	0.881788	-0.0211278	0.28234	0.0192855	0.851988	-0.0788016	-0.353274
ENSMUSG00000058546.8	Rpl23a	844.238	0.16405	0.314764	-0.521184	0.602239	0.913659	0.0892686	0.760911	-0.254215	0.643351	-0.0618789	0.284109
ENSMUSG00000032399.8	Rpl4	3736.86	0.10534	0.245807	-0.428546	0.668253	0.933931	-0.0205292	-0.66491	-0.324517	-0.0647519	-0.428612	-0.478424
ENSMUSG00000058558.12	Rpl5	1343.78	-0.0221769	0.353308	0.0627695	0.94995	0.990378	-1.27133	-2.15297	-1.79913	-1.26463	-2.08286	-2.32568
ENSMUSG00000025647.16	Shisa5	468.821	0.812924	0.228458	-3.55831	0.000373247	0.0573109	0.208576	0.66163	0.491679	1.16899	0.854431	1.45483
ENSMUSG00000072647.6	Adam1a	103.428	-3.96089	1.19469	3.3154	0.000915109	0.091492	-5.2517	-1.44636	-5.91442	#NAME?	#NAME?	-5.29871
ENSMUSG00000020255.8	D10Wsu102e	795.165	-1.73777	0.298113	5.82924	5.56787e-09	2.07417e-05	-2.19803	-1.86622	-2.34634	-3.47475	-4.46618	-3.93937
ENSMUSG00000025949.16	Pikfyve	1057.44	-0.525502	0.168939	3.1106	0.00186708	0.13388	-0.228117	-0.458612	-0.216132	-0.915629	-0.84994	-0.996293
ENSMUSG00000029561.17	Oasl2	144.956	-1.65562	0.533263	3.1047	0.00190474	0.13388	0.961683	0.993133	1.50722	-1.09389	-0.277932	-0.896445
ENSMUSG00000027485.15	Bpifb1	2.29895	-6.92679	2.22927	3.1072	0.00188867	0.13388	4.61148	5.71569	4.52704	0.888358	-0.695842	#NAME?
ENSMUSG00000025868.6	Higd2a	1185.65	0.780545	0.253547	-3.0785	0.00208046	0.141032	0.925764	1.3556	1.61748	1.75584	1.98709	2.3442
ENSMUSG00000036402.13	Gng12	884.356	0.633241	0.186003	-3.40447	0.000662919	0.078398	-2.27455	-1.9723	-1.86029	-1.65146	-1.5155	-1.2984
ENSMUSG00000066861.14	Oas1g	4.75522	-8.49696	2.31489	3.67057	0.00024201	0.0461275	#NAME?	5.22332	#NAME?	#NAME?	#NAME?	#NAME?
ENSMUSG00000068264.11	Ap5s1	175.148	0.92908	0.310406	-2.99311	0.00276149	0.158499	-0.313554	-0.0951328	-0.309729	0.0920438	0.585417	1.00032
ENSMUSG00000037686.6	Aspg	41.9691	-3.01217	0.817025	3.68676	0.00022713	0.0451262	0.55552	2.2073	0.370024	-4.59105	-1.20631	-1.00554
ENSMUSG00000059534.8	Uqcr10	1899.73	0.515614	0.138669	-3.71831	0.000200557	0.0418382	1.80566	2.15151	1.79021	2.16962	2.31598	2.52797
ENSMUSG00000022665.15	Ccdc80	87.3606	1.59993	0.478862	-3.34111	0.000834455	0.0900091	-1.16844	-0.446409	-0.515655	1.3469	0.736703	0.143023
ENSMUSG00000039578.17	Ccser1	304.898	-1.1479	0.342454	3.35198	0.000802344	0.0891004	-0.21874	0.316177	-0.0661684	-1.23167	-0.907287	-1.42671
ENSMUSG00000035104.14	Eva1a	204.899	1.64258	0.527754	-3.1124	0.00185571	0.13388	-0.334755	-0.712175	0.0029967	0.299303	0.715539	2.09784
ENSMUSG00000046994.9	Mars2	534.177	-0.882174	0.258821	3.40843	0.000653383	0.0778885	-1.15174	-0.594565	-0.793413	-1.6703	-1.71714	-2.00333
ENSMUSG00000037270.18	4932438A13Rik	2960.49	-0.723927	0.214367	3.37705	0.000732685	0.0852949	-0.265104	-0.569391	-0.493122	-1.33113	-1.02726	-1.43111
ENSMUSG00000024404.7	Riok3	1139.21	-0.572255	0.153151	3.73654	0.000186573	0.0397161	-0.773715	-0.794202	-1.29416	-1.68756	-1.65612	-1.48626
ENSMUSG00000030669.13	Calca	46.2537	-1.68623	0.505546	3.33547	0.000851552	0.0905375	1.59635	2.29814	2.73729	0.849017	0.0307637	0.68115
ENSMUSG00000010529.6	Gm266	36.2308	2.26878	0.625325	-3.62817	0.00028544	0.0479823	-1.1314	-1.29374	-0.84001	0.682331	0.697938	1.87926
ENSMUSG00000064037.13	Gpn1	413.297	-0.532686	0.178051	2.99176	0.00277372	0.158499	0.617532	0.707251	0.456195	0.0199243	-0.0958104	-0.0161275
ENSMUSG00000020076.7	Ddx50	879.999	-0.732183	0.235124	3.11403	0.0018455	0.13388	-0.789502	-0.758688	-1.38186	-1.70412	-1.58554	-2.24316
ENSMUSG00000068758.8	Il3ra	14.4202	4.24481	1.40455	-3.02219	0.00250956	0.154569	#NAME?	#NAME?	-2.93113	0.205682	0.846312	0.420024
ENSMUSG00000066189.9	Cacng3	336.574	-1.03156	0.235585	4.37872	1.1938e-05	0.00613406	1.3388	1.05296	0.700062	-0.104404	-0.206891	0.0449584
ENSMUSG00000044894.14	Uqcrq	2868.01	0.630143	0.194223	-3.24443	0.00117686	0.106929	1.93664	2.22056	2.3233	2.70729	2.55505	2.87282
ENSMUSG00000028626.5	Col9a2	344.267	0.827206	0.200865	-4.11822	3.81812e-05	0.0149721	0.201889	0.340699	0.354705	1.06884	0.861179	1.16946
ENSMUSG00000040412.16	5330417C22Rik	173.347	-1.27565	0.392281	3.25187	0.00114648	0.105024	1.86621	1.80308	0.98307	-0.79401	0.482286	0.750032
ENSMUSG00000035325.16	Sec31a	1692.68	-0.449178	0.143542	3.12924	0.00175259	0.128647	0.763726	0.924772	0.921185	0.301959	0.289703	0.392416
ENSMUSG00000034891.13	Sncb	3604.81	0.764445	0.21498	-3.55589	0.000376705	0.0573109	1.11814	0.915175	1.26824	1.59719	1.91367	1.84932
ENSMUSG00000031879.14	Ciao2b	269.83	0.778996	0.226899	-3.43323	0.000596441	0.0753183	1.00432	1.2985	0.599957	1.86979	1.64225	1.45429
ENSMUSG00000042797.9	Aqp11	146.982	0.798907	0.266932	-2.99292	0.00276322	0.158499	0.262694	-0.0684306	0.108973	0.711313	0.791739	0.918791
ENSMUSG00000038126.17	Mphosph9	470.714	-1.31402	0.419197	3.13462	0.00172075	0.127512	-2.15385	-1.73494	-3.372	-4.38464	-3.49794	-3.34309
ENSMUSG00000022893.14	Adamts1	691.971	0.735665	0.244802	-3.00514	0.00265454	0.157591	0.242731	0.426316	0.992119	1.36925	1.05947	1.20062
ENSMUSG00000029821.15	Gsdme	346.971	-0.971327	0.28411	3.41884	0.000628897	0.0768131	-0.878106	-0.611174	-0.855751	-2.15198	-1.4431	-2.05408
ENSMUSG00000042208.15	0610010F05Rik	707.798	-0.744986	0.187465	3.97401	7.0674e-05	0.0210623	-0.156309	-0.249867	-0.656961	-1.27719	-0.965958	-1.38728
ENSMUSG00000015217.11	Hmgb3	143.92	1.29851	0.431979	-3.00595	0.00264752	0.157591	-2.09394	#NAME?	-1.48567	-1.12966	-1.01973	-1.0858
ENSMUSG00000026626.11	Ppp2r5a	584.99	-0.668656	0.221778	3.01498	0.00256998	0.155474	-0.877104	-0.584832	-1.28936	-1.46938	-2.02883	-1.54838
ENSMUSG00000090077.9	Lime1	28.1639	-2.34048	0.786696	2.97508	0.00292912	0.162453	3.67492	4.74259	1.50164	1.50659	0.773769	1.26521
ENSMUSG00000031026.15	Trim66	927.916	-1.81417	0.332436	5.4572	4.83693e-08	0.000102964	0.32609	0.294741	-0.419203	-2.07322	-2.03202	-1.50297
ENSMUSG00000048078.16	Tenm4	816.262	-0.556359	0.177564	3.13329	0.00172857	0.127512	0.501886	0.468895	0.611666	-0.417818	-0.00510385	0.0108941
ENSMUSG00000034252.14	Senp6	1336.63	-0.609837	0.194392	3.13715	0.00170597	0.127103	-0.921835	-0.792182	-1.55444	-1.76584	-1.63857	-1.94847
ENSMUSG00000042213.17	Zfand4	84.9178	-1.63459	0.424404	3.8515	0.000117395	0.0289634	-0.710194	-1.11261	-1.03092	-2.76946	-2.8278	-2.34083
ENSMUSG00000029641.8	Rasl11a	160.472	1.64662	0.367729	-4.47781	7.54115e-06	0.00488568	1.6868	0.00338511	0.973087	2.261	2.41791	2.85818
ENSMUSG00000025584.17	Pde8a	224.172	-0.719605	0.238841	3.01291	0.00258758	0.155474	-0.303178	-0.16778	-0.0785747	-0.947198	-0.940259	-1.1322
ENSMUSG00000028364.15	Tnc	848.804	1.36238	0.32354	-4.21087	2.5439e-05	0.0105296	0.187675	0.707506	1.26824	1.74638	2.17784	2.0715
ENSMUSG00000031246.14	Sh3bgrl	939.097	0.566229	0.187547	-3.01913	0.00253499	0.155034	-1.04213	-0.72637	-0.515744	-0.147392	-0.46273	-0.224075
ENSMUSG00000030605.15	Mfge8	2131.04	0.93799	0.310836	-3.01764	0.0025475	0.155034	1.01267	1.86168	1.99329	2.45518	2.03572	2.93727
ENSMUSG00000030413.7	Pglyrp1	559.506	1.20799	0.273646	-4.41442	1.01283e-05	0.00580467	2.5533	2.72873	2.94378	3.96344	3.54049	4.00527
ENSMUSG00000026725.17	Tnn	9.80505	4.36454	1.3195	-3.30772	0.000940594	0.0928198	-2.85144	#NAME?	-0.845824	1.85548	-0.421706	4.91209
ENSMUSG00000006527.16	Sfmbt1	484.1	-0.803332	0.197338	4.07085	4.68419e-05	0.0161944	-0.981416	-0.712699	-0.608577	-1.6959	-1.58811	-1.66087
ENSMUSG00000025764.14	Jade1	702.013	-0.950852	0.218927	4.34325	1.40392e-05	0.00697325	-1.20717	-1.69759	-1.36039	-2.69098	-2.34876	-2.35904
ENSMUSG00000004945.15	Tmem242	509.334	0.840825	0.25179	-3.33939	0.000839626	0.0900091	0.137676	-0.222935	-0.20303	0.279743	0.543387	1.07073
ENSMUSG00000044165.12	Bcl2l15	285.575	-1.54132	0.510801	3.01746	0.00254904	0.155034	-2.83028	-2.57989	-4.42282	-5.60273	-4.81125	-4.30866
ENSMUSG00000022051.15	Bnip3l	1188.7	0.530751	0.175562	-3.02316	0.00250151	0.154569	-2.12809	-2.73712	-2.45177	-2.02341	-2.0783	-1.8279
ENSMUSG00000037465.10	Klf10	421.481	-0.757302	0.240906	3.14356	0.00166908	0.125611	0.648889	1.05051	0.505739	0.0824493	-0.482173	0.0810492
ENSMUSG00000019977.16	Hbs1l	661.548	-0.618227	0.189842	3.25654	0.00112778	0.104401	-0.333365	-0.687445	-1.05616	-1.29735	-1.36442	-1.50925
ENSMUSG00000030557.17	Mef2a	2847.92	-0.67971	0.13144	5.17124	2.32543e-07	0.000385013	-0.615364	-0.887151	-0.727259	-1.49733	-1.42916	-1.60818
ENSMUSG00000052854.15	Nrk	932.736	0.634367	0.201618	-3.14639	0.00165302	0.125192	-1.35604	-1.57891	-1.19135	-0.83855	-0.527766	-1.11147
ENSMUSG00000037710.8	Cisd1	1301.97	0.476069	0.157529	-3.0221	0.00251027	0.154569	1.3303	1.2747	1.02046	1.56316	1.50445	1.69793
ENSMUSG00000012819.15	Cdh23	42.5339	-1.54724	0.490497	3.15443	0.00160813	0.122886	1.84304	0.274542	0.882422	-0.813948	-0.732727	0.108713
ENSMUSG00000070420.4	Zscan25	251.363	-0.830308	0.257094	3.2296	0.00123965	0.109692	0.764577	1.37286	0.773638	-0.376054	0.217883	0.307516
ENSMUSG00000068959.6	Zfp619	123.859	-1.15268	0.333138	3.46006	0.00054005	0.0717478	-0.8254	0.06633	-0.942419	-1.49948	-1.78522	-1.99476
ENSMUSG00000054387.13	Mdm4	1229.58	-0.71292	0.206304	3.45568	0.000548906	0.0717478	-3.32741	-2.91703	-3.6171	-4.11464	-3.92572	-4.28396
ENSMUSG00000036504.6	Phpt1	702.965	0.9275	0.168421	-5.50705	3.64897e-08	9.06222e-05	2.08803	2.06618	1.77038	2.68887	2.72768	2.99308
ENSMUSG00000033705.17	Stard9	363.327	-2.31783	0.598976	3.86966	0.000108989	0.0275263	-0.716893	-1.04647	-2.87359	-4.30318	-4.13733	-2.9437
ENSMUSG00000021189.11	Atxn3	315.516	-0.738725	0.243245	3.03696	0.00238978	0.150254	-1.16219	-1.04813	-1.70859	-2.00737	-2.22208	-2.16791
ENSMUSG00000025889.13	Snca	1069.76	0.748222	0.236901	-3.15838	0.00158651	0.122821	0.566455	-0.0852081	0.120107	1.14769	0.851335	0.546005
ENSMUSG00000049775.16	Tmsb4x	7470.97	1.00031	0.166759	-5.99852	1.99124e-09	9.89048e-06	0.979467	0.641439	0.425838	1.57654	1.50882	1.69177
ENSMUSG00000024805.16	Pcgf5	253.505	-0.913796	0.300828	3.0376	0.00238467	0.150254	-0.971674	-1.34719	-2.35258	-2.42554	-2.66956	-2.46558
ENSMUSG00000042599.8	Kdm7a	1389.47	-0.772341	0.25406	3.03999	0.00236585	0.150015	-1.32642	-1.06417	-1.47473	-1.77811	-2.26076	-2.35947
ENSMUSG00000029622.16	Arpc1b	266.338	1.00731	0.255313	-3.9454	7.96678e-05	0.0223243	-1.13431	-1.18331	-1.03926	-0.19605	-0.492635	0.10625
ENSMUSG00000036596.6	Cpz	66.1452	1.92594	0.60994	-3.15759	0.0015908	0.122821	0.703065	2.32479	0.970303	3.90255	2.73375	2.87118
ENSMUSG00000063297.7	Luzp2	4288.82	0.513298	0.133589	-3.84237	0.000121851	0.0289634	-0.648706	-0.452681	-0.705514	-0.0569691	-0.315219	-0.172042
ENSMUSG00000016252.7	Atp5e	2186.12	0.903797	0.194121	-4.65584	3.22667e-06	0.00282827	1.99104	2.02628	2.30872	3.11073	2.66823	3.00132
ENSMUSG00000026447.16	Pik3c2b	250.173	-0.856415	0.218489	3.91971	8.8655e-05	0.0240191	0.621853	0.67846	0.532383	-0.409788	-0.575652	-0.0510773
ENSMUSG00000003746.16	Man1a	679.879	0.534526	0.169262	-3.15798	0.00158864	0.122821	0.225361	0.282801	0.403617	0.80974	0.659811	0.787235
ENSMUSG00000041841.8	Rpl37	784.485	1.12082	0.260122	-4.30883	1.64119e-05	0.0074107	0.0383327	-0.103657	-0.280645	1.17875	0.433884	1.07242
ENSMUSG00000027951.16	Adar	1841.1	-0.67344	0.193445	3.48131	0.000498977	0.0682133	-0.183128	-0.247913	-0.250877	-1.15148	-0.69585	-1.19478
ENSMUSG00000079497.4	Gm13420	3.80569	-8.01053	2.15753	3.71282	0.000204965	0.0418382	6.61148	5.1492	4.52704	#NAME?	#NAME?	-0.553915
ENSMUSG00000034154.15	Ino80	539.034	-0.943694	0.261891	3.60339	0.000314092	0.0520032	-1.0295	-0.784424	-1.36068	-2.40182	-1.96006	-1.90029
ENSMUSG00000051236.13	Msrb3	127.969	1.89314	0.416462	-4.54577	5.47346e-06	0.00382769	-1.88988	-2.846	-1.52858	-0.261676	0.076605	-0.466945
ENSMUSG00000009741.15	Ubp1	1073.28	-0.62347	0.159743	3.90296	9.50238e-05	0.0248412	-1.37918	-1.25141	-1.69659	-2.08613	-2.19479	-2.19687
ENSMUSG00000057715.13	A830018L16Rik	809.598	-1.07272	0.313458	3.42223	0.000621099	0.0767908	-0.783836	-0.248387	-1.01952	-1.39625	-1.92862	-2.29699
ENSMUSG00000030677.8	Kif22	94.4119	1.79965	0.54634	-3.29402	0.000987668	0.0955665	-4.23891	-4.57281	-1.95623	-2.1939	-1.36225	-0.896055
ENSMUSG00000026941.16	Mamdc4	45.5316	-3.63127	1.14826	3.16241	0.00156471	0.122714	-1.71037	-1.4688	#NAME?	#NAME?	#NAME?	-4.15317
ENSMUSG00000038369.14	Ncoa6	1347.59	-0.707893	0.210809	3.35798	0.000785146	0.0890005	-0.345732	-0.574943	-0.48811	-1.30422	-1.09123	-1.40369
ENSMUSG00000056216.9	Cebpg	859.985	-0.906709	0.255897	3.54325	0.00039522	0.057737	-1.33517	-0.901193	-1.30079	-1.75946	-2.50771	-2.22739
ENSMUSG00000032715.9	Trib3	104.977	-3.64605	0.799853	4.5584	5.15438e-06	0.00382769	0.587457	2.23204	-1.89355	-3.24455	-4.16013	-1.73537
ENSMUSG00000058440.14	Nrf1	358.328	-0.656144	0.197275	3.32604	0.00088088	0.0905375	0.00550025	0.0745243	-0.0193839	-0.873871	-0.666221	-0.643326
ENSMUSG00000057322.12	Rpl38	1139.29	1.15535	0.283937	-4.06905	4.72054e-05	0.0161944	0.842339	0.801389	1.48763	2.34546	1.74136	2.26096
ENSMUSG00000038781.7	Stap2	130.892	1.2249	0.401794	-3.04858	0.00229928	0.147679	-1.33737	-1.18726	-0.979683	0.259396	-0.235227	-0.188439
ENSMUSG00000040365.14	Trim41	412.549	-0.804293	0.197019	4.08231	4.45902e-05	0.0161944	-0.980768	-0.736445	-1.2073	-1.9179	-1.88758	-1.81871
ENSMUSG00000053754.14	Chd8	1775.04	-0.471559	0.136425	3.45654	0.000547167	0.0717478	0.0538517	-0.119846	-0.163771	-0.564395	-0.652747	-0.707164
ENSMUSG00000015597.17	Zfp318	771.364	-0.644932	0.211429	3.05034	0.00228581	0.14745	-0.290846	-0.325066	-0.8135	-1.35613	-0.88818	-1.48541
ENSMUSG00000041408.18	Wapl	1183.11	-0.573294	0.187832	3.05216	0.00227203	0.14745	-0.619026	-0.719382	-1.17654	-1.40614	-1.33008	-1.7791
ENSMUSG00000028470.10	Hint2	391.071	0.916298	0.252051	-3.63537	0.000277583	0.0479823	1.4202	1.7193	1.85003	2.40029	2.62861	2.40948
ENSMUSG00000031610.3	Scrg1	656.364	0.813723	0.234473	-3.47043	0.000519621	0.0703897	1.66173	1.44568	1.58529	1.84073	2.63056	2.43281
ENSMUSG00000030122.12	Ptms	2435.79	1.0303	0.337658	-3.05131	0.00227845	0.14745	-0.675525	-1.28123	-0.228377	0.367898	0.225303	0.204309
ENSMUSG00000018930.3	Ccl4	13.3621	-4.23586	1.16783	3.62713	0.000286586	0.0479823	6.61148	5.22332	4.60587	1.97576	0.439928	1.94571
ENSMUSG00000052726.15	Kcnt2	119.234	-2.13235	0.521732	4.08706	4.36869e-05	0.0161944	3.39938	1.56001	0.636109	-0.369294	-0.365911	-0.450566
ENSMUSG00000041697.8	Cox6a1	4275.36	0.872298	0.195277	-4.46698	7.93313e-06	0.00492548	1.39958	1.30661	1.4694	2.05255	2.03735	2.43235
ENSMUSG00000002393.14	Nr2f6	210.32	1.056	0.274435	-3.84792	0.000119125	0.0289634	0.818442	0.0612378	0.697436	1.12712	1.60464	1.7528
ENSMUSG00000041958.10	Pigs	1802.11	0.694604	0.203032	-3.42115	0.000623561	0.0767908	0.875155	0.421393	1.11758	1.41545	1.34832	1.52182
ENSMUSG00000032135.15	Mcam	1222.21	0.678208	0.226097	-2.99963	0.00270305	0.158499	0.625934	0.856948	0.707987	1.57144	1.1319	1.18523
ENSMUSG00000057841.5	Rpl32	956.889	0.877774	0.269021	-3.26284	0.00110302	0.103371	-0.458018	-0.822022	-0.218412	0.613637	-0.0371898	0.317539
ENSMUSG00000038880.13	Mrps34	417.929	0.787325	0.248396	-3.16963	0.00152633	0.120978	3.14882	2.97569	3.53878	4.0246	3.72904	4.0751
ENSMUSG00000074781.5	Ube2n	1404.07	0.861038	0.256503	-3.35683	0.000788408	0.0890005	-3.35111	-3.71306	-3.22251	-2.26279	-2.61906	-3.14752
ENSMUSG00000061518.11	Cox5b	2131.78	0.768729	0.152355	-5.04563	4.52024e-07	0.000612328	1.50169	1.0792	1.16167	2.07433	1.93708	1.75957
ENSMUSG00000065947.3	mt-Nd4l	119.191	2.0956	0.684205	-3.06282	0.00219261	0.144772	-6.08091	-3.38838	-2.22964	-2.10806	-1.77693	-0.52599
ENSMUSG00000028069.16	Gpatch4	93.8681	-1.13099	0.376265	3.00583	0.00264853	0.157591	-0.815216	-0.473404	-0.528582	-1.53024	-1.85941	-2.05761
ENSMUSG00000048271.14	Rbm33	1121.96	-0.690514	0.208084	3.31844	0.000905208	0.0914317	-1.87812	-1.4416	-1.93716	-2.49657	-2.81584	-2.28679
ENSMUSG00000035686.8	Thrsp	521.387	0.685471	0.180485	-3.79794	0.000145901	0.0324488	0.0126138	-0.216562	0.00472921	0.400272	0.478855	0.713909
ENSMUSG00000024548.11	Setbp1	611.408	-0.878838	0.238743	3.6811	0.000232229	0.0455321	-1.36045	-1.69249	-2.01153	-2.95003	-2.45703	-2.59055
ENSMUSG00000050730.17	Arhgap42	153.937	1.16634	0.351985	-3.31361	0.000920999	0.091492	-0.830344	-2.61738	-1.18605	-0.288666	-0.259952	-0.369153
ENSMUSG00000039278.10	Pcsk1n	4550.84	1.38554	0.356742	-3.88388	0.000102803	0.0264114	2.42605	2.3383	2.96307	3.40332	3.48929	4.59698
ENSMUSG00000028337.14	Coro2a	316.14	-0.792617	0.236358	3.35345	0.000798099	0.0891004	-0.784297	-0.436839	-0.687134	-1.82305	-1.3445	-1.41418
ENSMUSG00000021902.7	Phf7	46.0552	-1.62513	0.531102	3.05993	0.00221391	0.144772	-0.910596	-0.332427	-0.461932	-2.76888	-2.48994	-1.57793
ENSMUSG00000029156.11	Sgcb	1141.44	0.506925	0.132538	-3.82474	0.000130911	0.0300108	-0.442448	-0.414039	-0.396544	0.0901667	-0.0950818	0.00534174
ENSMUSG00000044783.16	Hjurp	787.683	-0.893211	0.226605	3.94171	8.09016e-05	0.0223243	-1.57213	-1.67282	-2.31494	-3.19507	-2.69394	-2.62914
ENSMUSG00000036687.13	Tmem184a	11.1598	-4.14322	1.30428	3.17662	0.00149	0.119178	-1.04035	2.86817	0.552155	-3.20091	#NAME?	-1.43188
ENSMUSG00000011877.13	Git1	1607.12	-0.77253	0.214815	3.59626	0.00032282	0.0528609	0.0100917	0.224406	-0.0738535	-1.06092	-0.856149	-0.549033
ENSMUSG00000010755.17	Cars	1102.44	-0.558791	0.180768	3.0912	0.0019935	0.137524	0.0327384	0.0147413	-0.358276	-0.851651	-0.922397	-0.502917
ENSMUSG00000089665.2	Fcor	229.697	0.849659	0.239312	-3.55042	0.000384611	0.0573109	2.30433	2.44303	2.82325	3.23072	3.43435	3.16625
ENSMUSG00000087006.3	Gm13889	366.065	1.13247	0.370116	-3.05976	0.00221515	0.144772	0.92834	1.0221	1.53169	1.70571	2.59282	2.41835
ENSMUSG00000075376.10	Rc3h2	1422.81	-0.66078	0.197746	3.34155	0.00083311	0.0900091	-0.785736	-1.02663	-1.22772	-1.80241	-1.63863	-1.83804
ENSMUSG00000032423.12	Syncrip	1639.15	-0.845135	0.276047	3.06156	0.00220188	0.144772	-1.99262	-1.77021	-2.38335	-2.48054	-2.93609	-3.59419
ENSMUSG00000001240.13	Ramp2	723.99	1.21065	0.350863	-3.45048	0.000559592	0.0723498	2.37546	1.15748	2.32707	3.31167	2.7654	3.29588
ENSMUSG00000093674.7	Rpl41	1091.12	1.49064	0.195048	-7.64242	2.13169e-14	3.17643e-10	-1.40736	-1.40607	-1.17191	0.0977054	-0.131504	0.277582
ENSMUSG00000007944.8	Ttc9b	436.714	1.06101	0.302207	-3.51087	0.000446644	0.0633851	0.628992	1.13443	1.25173	2.0802	1.78539	2.17505
ENSMUSG00000029238.11	Clock	1463.7	-0.709601	0.223301	3.17778	0.00148408	0.119178	-2.09573	-2.01321	-2.87615	-3.1248	-3.03955	-3.12205
ENSMUSG00000026875.14	Traf1	62.8102	1.59704	0.494658	-3.22858	0.00124408	0.109692	-3.21512	-2.521	-0.758741	-0.0219376	-0.568724	-0.568992
ENSMUSG00000026548.4	Slamf9	13.8619	-2.83594	0.924579	3.06727	0.0021602	0.144772	2.51539	3.15666	4.0209	-0.0415389	-0.229561	0.913878
ENSMUSG00000020218.11	Wif1	303.294	0.986135	0.321924	-3.06326	0.00218941	0.144772	0.765531	0.498911	0.630658	1.92091	1.22194	1.51721
ENSMUSG00000057132.16	Rpgrip1	11.1062	-3.73865	1.13726	3.28742	0.00101109	0.0972019	1.14017	1.8224	0.455419	#NAME?	-1.70031	#NAME?
ENSMUSG00000036275.13	9530068E07Rik	1799.61	0.554945	0.181067	-3.06486	0.00217774	0.144772	-0.0249135	0.287399	0.115483	0.365664	0.446091	0.929877
ENSMUSG00000045790.10	Ccdc149	324.415	-1.22167	0.309416	3.94831	7.87033e-05	0.0223243	-0.480451	-0.0296571	-1.02737	-1.90393	-1.586	-1.80976
ENSMUSG00000036281.13	Snapc4	335.546	-0.975629	0.271677	3.59114	0.000329236	0.0531345	-0.812139	-1.38244	-1.9538	-2.69655	-2.49452	-2.06754
ENSMUSG00000039048.15	Foxred1	420.49	-0.740369	0.216921	3.41308	0.00064232	0.0772254	0.364046	0.203694	-0.228845	-1.08229	-0.736974	-0.350721
ENSMUSG00000031616.7	Ednra	107.639	1.06517	0.320212	-3.32644	0.000879638	0.0905375	-0.33169	0.46933	0.503735	1.5002	1.26169	0.920161
ENSMUSG00000055629.5	B4galnt4	648.225	-0.847626	0.25057	3.38279	0.000717547	0.0841903	-0.330145	-0.629621	-1.07559	-1.94008	-1.53357	-1.39248
ENSMUSG00000028648.13	Ndufs5	859.722	0.714773	0.196121	-3.64456	0.000267849	0.0472963	0.710016	0.58742	0.384747	1.09825	0.960229	1.50106
ENSMUSG00000038801.6	Scgb1c1	4.03535	-7.21624	2.06081	3.50165	0.000462382	0.0641306	6.61148	2.41596	#NAME?	#NAME?	-2.39616	-1.7228
ENSMUSG00000003360.15	Ddx23	995.468	-0.559501	0.16822	3.326	0.00088101	0.0905375	-0.362665	0.0337964	-0.386818	-0.73539	-0.910979	-1.03278
ENSMUSG00000072568.4	Lratd2	168.337	-1.20303	0.378845	3.17553	0.00149563	0.119178	-1.80909	-1.56184	-0.843433	-2.66348	-3.14391	-2.26633
ENSMUSG00000021595.18	Nsun2	750.774	-0.635142	0.199671	3.18094	0.00146799	0.118883	0.0382843	0.504263	-0.275718	-0.502674	-0.629724	-0.751734
ENSMUSG00000046634.12	Pkd1l1	5.16284	-6.21933	1.92089	3.23774	0.0012048	0.108216	3.04518	3.15719	5.52704	#NAME?	#NAME?	#NAME?
ENSMUSG00000051811.14	Cox6b2	193.348	1.21206	0.380762	-3.18324	0.00145636	0.118586	0.775459	1.57714	1.95639	2.37766	2.94243	2.31311
ENSMUSG00000059325.14	Hopx	1886.3	0.80615	0.270151	-2.98408	0.00284435	0.160544	0.452909	0.978518	1.48733	1.63333	1.74888	1.82247
ENSMUSG00000022228.14	Zscan26	1015.92	-0.668733	0.201037	3.32642	0.000879707	0.0905375	-1.35683	-1.24792	-1.49642	-1.73976	-2.43656	-2.25361
ENSMUSG00000025403.5	Shmt2	1323.53	-0.705101	0.194325	3.62846	0.00028512	0.0479823	0.248947	0.390619	0.348568	-0.63112	-0.632024	-0.17847
ENSMUSG00000054312.6	Mrps21	327.107	0.875555	0.266894	-3.28053	0.00103612	0.0987798	0.729741	0.275515	0.560238	1.31027	1.02737	1.60101
ENSMUSG00000042308.14	Setd1a	311.477	-1.2099	0.329439	3.67261	0.000240085	0.0461275	-0.893778	-0.185053	-0.772742	-2.58609	-2.02646	-1.30386
ENSMUSG00000041203.9	Trir	618.796	0.848562	0.24863	-3.41295	0.000642638	0.0772254	0.732737	0.363262	0.651078	1.30772	1.14824	1.55491
ENSMUSG00000034926.3	Dhcr24	1375.98	0.594712	0.193379	-3.07536	0.00210246	0.141759	0.82021	0.920798	1.20325	1.54924	1.34393	1.55311
ENSMUSG00000002028.13	Kmt2a	2223.47	-1.42502	0.434553	3.27927	0.00104076	0.0987798	-0.898442	-1.24196	-2.27956	-2.67408	-3.08507	-2.80088
ENSMUSG00000021408.15	Ripk1	134.87	0.998219	0.31289	-3.19032	0.00142113	0.116353	-0.725082	-1.82005	-1.21981	-0.0453909	-0.371643	-0.509226
ENSMUSG00000034614.14	Pik3ip1	642.836	1.01598	0.294594	-3.44873	0.000563222	0.0723498	-0.395155	-0.119093	0.576756	0.764519	0.857351	1.23529
ENSMUSG00000040280.10	Ndufa4l2	53.8267	1.42238	0.467207	-3.04444	0.00233117	0.148448	-0.739169	0.35962	0.831623	1.83611	1.5809	1.28506
ENSMUSG00000079508.8	Apoo	364.258	0.774893	0.212036	-3.65454	0.000257644	0.046819	-1.01822	-0.323903	-0.746721	0.194311	-0.071535	-0.164578
ENSMUSG00000015947.10	Fcgr1	56.4557	1.96311	0.546941	-3.58926	0.000331623	0.0531345	-1.14891	-3.56493	-0.732799	0.392326	0.476857	0.789644
ENSMUSG00000042406.8	Atf4	2715.11	1.11174	0.315657	-3.522	0.000428305	0.0619629	-1.90509	-1.24786	-2.14724	-0.594722	-1.06033	-0.522132
ENSMUSG00000049755.14	Zfp672	253.114	-1.12276	0.3038	3.69572	0.00021926	0.0441513	-1.15487	-0.694451	-1.93465	-2.29765	-2.54729	-2.3836
ENSMUSG00000032101.6	Ddx25	787.367	-0.614031	0.17317	3.54582	0.000391399	0.057737	0.149696	0.332352	-0.173874	-0.679495	-0.47091	-0.645359
ENSMUSG00000017760.16	Ctsa	2094.43	0.543573	0.176585	-3.07825	0.00208221	0.141032	1.25238	1.31655	1.271	1.73316	1.59612	1.85202
ENSMUSG00000061080.11	Lsamp	4366.09	0.461539	0.142557	-3.23756	0.00120555	0.108216	-0.602949	-0.76546	-0.582401	-0.4844	-0.304473	-0.0787728
ENSMUSG00000025044.16	Msr1	12.1343	-3.11934	1.01243	3.08105	0.00206274	0.141032	2.58114	2.49507	0.737288	-1.05191	-2.00092	-0.37622
ENSMUSG00000032558.19	Nphp3	127.042	-1.23625	0.401458	3.0794	0.00207419	0.141032	-1.02574	-0.859415	-2.04179	-2.18253	-2.37574	-3.79825
ENSMUSG00000063765.12	Chadl	319.44	0.900883	0.282267	-3.1916	0.00141486	0.116353	1.31743	1.69118	2.02602	2.22883	2.41359	2.71187
ENSMUSG00000017493.12	Igfbp4	260.709	0.862049	0.27226	-3.16627	0.00154406	0.121736	0.317001	0.777307	0.424831	1.1174	1.04427	1.7061
ENSMUSG00000021025.8	Nfkbia	624.586	0.791172	0.216102	-3.66111	0.000251122	0.0467747	1.47823	1.12861	1.33669	2.14359	1.68965	2.15525
ENSMUSG00000005045.16	Chd5	670.113	-1.7232	0.281869	6.11347	9.74882e-10	7.26336e-06	0.0958662	-0.815303	-0.826821	-2.59333	-2.29637	-2.1283
ENSMUSG00000033526.16	Ppip5k1	1649.98	-0.570003	0.171525	3.32315	0.000890067	0.0908417	-0.633881	-0.792759	-1.18662	-1.70304	-1.40528	-1.49529
ENSMUSG00000047109.13	Cldn14	19.8741	4.38184	1.41739	-3.09147	0.00199166	0.137524	#NAME?	#NAME?	#NAME?	-3.34441	-1.68174	-1.13731
ENSMUSG00000075316.11	Scn9a	56.1306	-1.93899	0.652075	2.97357	0.00294357	0.162453	-1.7854	-0.751081	-2.9947	-3.52606	-3.76671	-3.67291
ENSMUSG00000020131.14	Pcsk4	40.3218	-1.8912	0.6358	2.97452	0.00293449	0.162453	-0.459269	-0.120814	0.726746	-3.97427	-1.57492	-0.939216
ENSMUSG00000027361.15	Gabpb1	360.897	-1.02619	0.2371	4.32809	1.50405e-05	0.00701528	0.12516	0.393104	-0.539059	-0.968933	-1.0883	-1.27304
ENSMUSG00000032374.14	Plod2	258.075	0.929054	0.269811	-3.44335	0.00057456	0.0731753	-0.40861	-0.250557	-0.835183	0.46802	0.37532	0.131569
ENSMUSG00000025246.13	Tbl1x	1178.11	-0.613913	0.153393	4.00221	6.27523e-05	0.0190831	-0.697968	-0.564352	-0.729874	-1.59576	-1.28705	-1.25358
ENSMUSG00000029752.12	Asns	3451.16	-0.821984	0.162169	5.06868	4.00594e-07	0.000596926	1.22249	1.25472	1.27805	0.628465	0.249841	0.143322
ENSMUSG00000036825.12	Ssx2ip	843.04	-0.618222	0.187617	3.29512	0.000983783	0.0955665	-0.570852	-0.769197	-1.00506	-1.80513	-1.2488	-1.49879
ENSMUSG00000025532.13	Crcp	291.825	-0.718185	0.238291	3.0139	0.00257913	0.155474	0.480573	0.946955	0.0940451	-0.279059	-0.14497	-0.474402
ENSMUSG00000008892.12	Vdac3	1941.92	-0.601501	0.188112	3.19757	0.0013859	0.11537	-0.201357	-0.0337452	-0.602046	-0.809984	-0.852563	-1.29374
ENSMUSG00000053644.13	Aldh7a1	1201.98	0.554571	0.157722	-3.51612	0.000437896	0.0627412	-0.159496	-0.132695	-0.0777442	0.236269	0.190288	0.582053
ENSMUSG00000036242.15	Armh4	3127.26	0.51098	0.16431	-3.10986	0.00187174	0.13388	0.407278	0.408462	0.287439	0.929734	0.972882	0.437537
ENSMUSG00000079018.10	Ly6c1	599.625	0.602298	0.16467	-3.65761	0.000254577	0.046819	1.03796	1.30279	0.937659	1.33829	1.70059	1.75623
ENSMUSG00000032254.10	Kif23	24.5768	-3.13044	0.764963	4.09228	4.2715e-05	0.0161944	0.140169	2.52995	0.777347	-0.893112	-2.10972	-3.02419
ENSMUSG00000049093.9	Il23r	4.32678	-7.04248	2.05847	3.42122	0.00062342	0.0767908	6.19644	4.73789	#NAME?	-0.0300816	#NAME?	-1.45252
ENSMUSG00000049658.13	Bdp1	726.151	-0.932516	0.291296	3.20126	0.00136826	0.115189	-1.58105	-1.50603	-2.35398	-2.35218	-2.83304	-3.2013
ENSMUSG00000042535.9	Gtpbp1	848.079	-0.997841	0.262687	3.7986	0.000145515	0.0324488	0.0621404	0.71293	0.225566	-0.784574	-0.914453	-0.504108
ENSMUSG00000046441.5	Cmtr2	239.482	-1.0093	0.307954	3.27745	0.00104751	0.0987908	-0.299444	-0.508965	-1.14906	-2.27531	-1.652	-1.48993
ENSMUSG00000022769.9	Sdf2l1	246.501	1.15097	0.359165	-3.20458	0.00135261	0.115189	1.62164	1.81791	0.537687	2.28638	1.82417	2.87158
ENSMUSG00000053329.7	Gatd3a	1127.69	0.454399	0.141844	-3.2035	0.00135766	0.115189	0.760421	1.04746	1.07456	1.28175	1.35882	1.34649
ENSMUSG00000029385.14	Ccng2	643.153	0.866604	0.190063	-4.55957	5.12586e-06	0.00382769	-1.83868	-1.90418	-1.88092	-1.01522	-0.96131	-1.33526
ENSMUSG00000040794.5	C1qtnf4	3263.75	1.21058	0.301087	-4.02068	5.80294e-05	0.0183978	3.05357	3.04326	3.74251	4.17726	4.40262	4.61259
ENSMUSG00000026566.15	Mpzl1	851.446	0.613212	0.139764	-4.38747	1.14675e-05	0.00610276	0.139521	0.276991	-0.00672376	0.577111	0.745808	0.626352
ENSMUSG00000057101.8	Zfp180	613.844	-1.2176	0.299456	4.06604	4.78192e-05	0.0161944	-2.18129	-2.03863	-2.64502	-3.37329	-3.9077	-3.47378
ENSMUSG00000040620.15	Dhx33	538.122	-0.694929	0.216848	3.20468	0.00135213	0.115189	-0.652223	-0.316348	-0.626848	-1.4811	-0.959745	-1.55628
ENSMUSG00000026275.13	Ppp1r7	1398.6	-0.612449	0.191293	3.20163	0.00136652	0.115189	-0.458299	-0.463501	-0.523391	-0.980184	-1.12929	-1.46927
ENSMUSG00000070858.12	Gm1673	577.838	1.95683	0.458689	-4.26613	1.98897e-05	0.00871696	2.90748	3.57017	4.26848	5.09019	5.06604	6.24213
ENSMUSG00000026082.11	Rev1	465.917	-0.592538	0.185299	3.19774	0.0013851	0.11537	-0.830946	-0.753517	-1.34565	-1.6677	-1.56463	-1.75957
ENSMUSG00000019883.11	Echdc1	318.857	0.911576	0.294664	-3.09361	0.00197734	0.137524	1.28715	1.14828	1.57911	2.37267	2.37691	1.72048
ENSMUSG00000005682.9	Pan2	616.48	-0.545132	0.169174	3.22231	0.0012716	0.110163	-0.926592	-0.610837	-0.714606	-1.45291	-1.54981	-1.14752
ENSMUSG00000103081.2	Pcdhgb8	39.011	-1.87147	0.580691	3.22284	0.00126927	0.110163	0.190969	1.20592	1.87335	-0.52182	-1.38373	-0.751417
ENSMUSG00000039108.14	Lsm14b	1394.07	-0.521175	0.126431	4.1222	3.75276e-05	0.0149721	0.885409	1.11214	0.923666	0.427211	0.337725	0.32008
ENSMUSG00000030967.15	Zranb1	1762.2	-0.847253	0.179118	4.73015	2.24351e-06	0.0021649	-1.01183	-1.1687	-1.61445	-2.32787	-1.96368	-2.30567
ENSMUSG00000020962.14	Gtf2a1	833.57	-0.416476	0.129105	3.22587	0.00125591	0.110084	-0.00668848	0.0552104	-0.125573	-0.629061	-0.513146	-0.474368
ENSMUSG00000028655.11	Mfsd2a	716.779	0.814013	0.217651	-3.73999	0.000184027	0.0397161	1.58315	1.75749	1.87282	2.74676	2.38229	2.23865
ENSMUSG00000000531.5	Grasp	75.6501	1.35513	0.3463	-3.91318	9.10894e-05	0.0242379	1.04302	0.0906999	1.22989	2.13979	2.21977	1.98896
ENSMUSG00000026959.13	Grin1	7298.18	0.424324	0.119463	-3.55192	0.000382433	0.0573109	2.14905	2.24142	2.07644	2.26891	2.67535	2.51074
ENSMUSG00000074896.3	Ifit3	139.739	-2.31403	0.437248	5.29226	1.20814e-07	0.000225032	-0.211644	0.0239314	-0.108241	-2.14917	-2.58305	-2.81001
ENSMUSG00000040488.17	Ltbp4	1228.96	0.708544	0.244637	-2.89631	0.00377578	0.174863	1.36702	1.44572	1.62465	2.03439	2.03185	2.25471
ENSMUSG00000055917.15	Zfp277	264.523	0.750087	0.259441	-2.89116	0.00383821	0.174863	-0.490057	-0.278457	-1.10181	0.439072	-0.159328	-0.190917
ENSMUSG00000000001.4	Gnai3	891.599	0.506266	0.179019	-2.828	0.00468391	0.185303	-0.637832	-0.795771	-0.887931	-0.0932565	-0.328564	-0.687512
ENSMUSG00000028478.18	Clta	2472.21	0.601294	0.213553	-2.81567	0.00486754	0.186922	0.716327	0.916845	0.931799	1.59527	1.28013	1.22387
ENSMUSG00000029309.7	Sparcl1	50081.8	0.384827	0.137637	-2.79596	0.00517465	0.188231	1.10956	0.881376	0.610333	0.975515	1.17277	1.32871
ENSMUSG00000002900.16	Lamb1	1138.06	0.592205	0.228269	-2.59433	0.00947743	0.235839	0.842279	0.430186	0.699265	1.30017	1.16362	0.999493
ENSMUSG00000032554.15	Trf	322.789	1.28247	0.52528	-2.4415	0.0146262	0.281977	-1.32549	-1.96281	-0.193501	1.0129	0.00617136	-0.646212
ENSMUSG00000029925.13	Tbxas1	39.8111	1.77881	0.741643	-2.39848	0.0164635	0.29736	-0.102316	#NAME?	-1.06848	0.865966	-0.0505161	1.19536
ENSMUSG00000026424.8	Gpr37l1	13196.6	0.641768	0.26921	-2.3839	0.0171304	0.301014	0.924498	1.23683	1.56186	1.54176	1.58682	2.16858
ENSMUSG00000004730.15	Adgre1	120.586	0.794359	0.342402	-2.31996	0.0203429	0.321453	0.267852	0.941762	0.37237	1.26959	1.04176	1.34625
ENSMUSG00000046865.7	Fbl	228.375	-0.583533	0.251813	2.31732	0.0204861	0.322017	-0.553203	-0.383331	-0.942248	-1.041	-1.35813	-1.47864
ENSMUSG00000027668.13	Mfn1	1559.51	0.323813	0.148429	-2.1816	0.0291391	0.367034	-0.431521	-0.756166	-0.901225	-0.667116	-0.353165	-0.389632
ENSMUSG00000025878.16	Uimc1	211.509	-0.993013	0.468079	2.12146	0.0338827	0.388959	-1.15778	-0.292601	-2.16962	-1.5673	-3.08077	-2.13912
ENSMUSG00000053768.13	Chchd3	1016.67	0.326278	0.157238	-2.07506	0.0379809	0.403718	0.404669	0.0974696	0.218142	0.467101	0.48539	0.474157
ENSMUSG00000039062.15	Anpep	182.682	0.751922	0.364225	-2.06444	0.0389757	0.406422	0.504291	1.40583	0.827173	2.31129	1.28702	1.18063
ENSMUSG00000031818.12	Cox4i1	8692.35	0.304149	0.148959	-2.04183	0.0411684	0.410609	1.64131	1.47047	1.54148	1.68384	1.59741	2.01474
ENSMUSG00000037730.13	Mynn	493.543	-0.478215	0.238245	2.00724	0.0447245	0.427142	-0.547921	-0.67169	-0.98134	-1.05215	-1.18843	-1.71769
ENSMUSG00000031425.15	Plp1	82825.1	0.456319	0.227999	-2.00141	0.0453485	0.430681	0.552291	0.726582	0.98575	1.37542	1.03337	0.959727
ENSMUSG00000004264.17	Phb2	877.643	0.301631	0.150952	-1.99819	0.0456963	0.432056	0.471245	0.702796	0.755956	0.734818	0.831005	1.00976
ENSMUSG00000026087.11	Mrpl30	488.95	-0.368755	0.184648	1.99708	0.0458169	0.43245	0.86031	0.812885	0.375143	0.220388	0.0232939	0.445134
ENSMUSG00000032855.6	Pkd1	1781.61	-1.0378	0.520393	1.99427	0.0461226	0.433845	-0.462157	-0.258572	-1.9883	-2.36319	-2.28285	-1.15509
ENSMUSG00000028436.8	Dcaf12	740.85	0.309249	0.157193	-1.96732	0.0491468	0.444905	-1.31248	-1.407	-1.47814	-1.16041	-1.1286	-1.27472
ENSMUSG00000061904.12	Slc25a3	8005.68	0.284856	0.146303	-1.94703	0.051531	0.45084	1.03183	1.14836	1.34795	1.4134	1.42582	1.28018
ENSMUSG00000005881.13	Ergic3	1701.98	0.37216	0.191798	-1.94037	0.0523342	0.452288	0.946195	1.22633	1.054	1.21235	1.07507	1.7317
ENSMUSG00000042079.13	Hnrnpf	505.233	-0.623535	0.324651	1.92063	0.0547786	0.456866	-3.51699	-3.58294	-3.98267	-4.1206	-5.17546	-4.02307
ENSMUSG00000032349.13	Elovl5	2156.86	0.413363	0.216571	-1.90867	0.0563041	0.460856	0.364538	0.617948	0.969735	1.23135	0.854501	0.903087
ENSMUSG00000021038.17	Vipas39	624.65	-0.406863	0.214485	1.89693	0.0578369	0.467369	-0.270631	-0.180557	-0.594279	-0.867269	-0.69349	-1.04627
ENSMUSG00000017344.4	Vtn	2798.26	0.505186	0.279455	-1.80775	0.0706448	0.499031	1.63318	2.11371	1.74052	2.63082	1.78942	2.21981
ENSMUSG00000021242.9	Npc2	1280.78	0.314369	0.174367	-1.80292	0.0714011	0.500129	0.630973	0.60256	0.421311	0.898811	0.50242	0.897086
ENSMUSG00000056296.17	Synpr	2211.7	0.393126	0.217862	-1.80447	0.0711575	0.500129	0.69937	0.851079	0.417631	0.822441	0.950214	1.09337
ENSMUSG00000014077.13	Chp1	1070.99	0.297945	0.171267	-1.73965	0.0819202	0.521013	-1.25976	-1.00638	-1.20814	-1.16529	-1.03001	-0.676938
ENSMUSG00000033065.14	Pfkm	7339.39	-0.212057	0.122326	1.73354	0.0829996	0.522947	0.454384	0.573053	0.482033	0.160679	0.248544	0.184831
ENSMUSG00000030534.13	Vps33b	314.675	-0.364646	0.212595	1.71522	0.0863057	0.530593	0.264964	0.2207	0.605114	-0.314082	0.146029	-0.129452
ENSMUSG00000033191.14	Tie1	346.833	0.38367	0.227471	-1.68668	0.0916658	0.539433	0.70731	0.863401	0.779406	1.38953	0.820872	1.02436
ENSMUSG00000046711.16	Hmga1	292.461	0.67409	0.414396	-1.62668	0.103805	0.56535	-2.32841	-2.78625	-1.82927	-1.68675	-1.25311	-2.59897
ENSMUSG00000041632.7	Mrps27	339.877	0.419536	0.258306	-1.62418	0.104337	0.565964	0.721143	0.0211834	0.89241	0.875503	1.03342	0.85461
ENSMUSG00000015932.8	Dstn	2987.35	0.363325	0.227106	-1.59981	0.109642	0.575271	0.130536	0.234536	0.34852	0.825574	0.49975	0.158362
ENSMUSG00000027195.10	Hsd17b12	2082.17	0.313369	0.195924	-1.59944	0.109723	0.575494	0.87343	0.974118	0.765779	1.34387	0.777876	1.12474
ENSMUSG00000048076.14	Arf1	3042.04	-0.210454	0.133451	1.57701	0.114794	0.581302	-0.713566	-0.432934	-0.701081	-1.03187	-0.789587	-0.945192
ENSMUSG00000032125.20	Robo4	204.315	0.678037	0.434767	-1.55954	0.118869	0.587376	0.552343	0.234601	1.37813	1.98208	1.01355	0.999483
ENSMUSG00000054099.11	Slc25a40	204.187	0.410933	0.270045	-1.52172	0.128078	0.599306	-1.3268	-1.71967	-1.71368	-1.48201	-1.0642	-1.28645
ENSMUSG00000034707.7	Gns	1646.65	0.249135	0.179596	-1.3872	0.165381	0.649707	0.289661	0.353875	0.6941	0.484459	0.534264	0.76999
ENSMUSG00000029147.11	Ppm1g	1270.09	-0.193705	0.140664	1.37707	0.16849	0.652109	0.766348	0.979442	0.827462	0.604282	0.454808	0.660977
ENSMUSG00000038860.15	Garnl3	2419.63	-0.347459	0.256545	1.35438	0.175616	0.661154	-0.276714	-0.193554	-0.718276	-1.00844	-0.63248	-0.794455
ENSMUSG00000030082.14	Sec61a1	2234.08	0.275156	0.203861	-1.34973	0.177104	0.662129	1.14928	0.882847	1.61038	1.49366	1.44248	1.31008
ENSMUSG00000024507.6	Hsd17b4	1279.64	0.384552	0.285817	-1.34545	0.17848	0.663323	0.415964	0.203637	0.669707	1.09809	0.685739	0.331165
ENSMUSG00000027787.14	Nmd3	584.725	-0.297679	0.221598	1.34333	0.179166	0.663624	0.609483	0.253319	0.0623764	0.0796696	0.141648	-0.508262
ENSMUSG00000027984.8	Hadh	547.773	0.374886	0.279302	-1.34222	0.179523	0.66478	0.830378	0.431246	1.39396	1.1656	1.35534	1.05655
ENSMUSG00000001525.10	Tubb5	4939.92	0.285398	0.213072	-1.33944	0.180427	0.665907	0.91787	1.1942	1.30209	1.34493	1.34517	1.3407
ENSMUSG00000037523.13	Mavs	196.918	0.31876	0.239561	-1.3306	0.18332	0.669195	0.135853	0.0996079	0.401335	0.497962	0.511651	0.351222
ENSMUSG00000039795.14	Zfand1	189.806	-0.52612	0.403322	1.30447	0.192075	0.678064	-1.37189	-1.90308	-2.46358	-2.24414	-2.44871	-2.73273
ENSMUSG00000023944.14	Hsp90ab1	19840.2	0.351912	0.279301	-1.25997	0.207679	0.696099	0.0603929	-0.0678645	0.474181	0.830382	0.373177	0.00532474
ENSMUSG00000042613.9	Pbxip1	714.454	0.423041	0.339665	-1.24547	0.21296	0.700204	-0.178237	-0.02302	-0.0834361	-0.224596	-0.0775964	0.838515
ENSMUSG00000022257.4	Laptm4b	2080.73	0.232205	0.195659	-1.18678	0.235314	0.723193	1.23036	1.17034	1.65573	1.26851	1.59832	1.65278
ENSMUSG00000007655.16	Cav1	287.654	0.459173	0.387637	-1.18454	0.236198	0.723801	-0.0518673	-0.0541897	0.103388	1.2023	-0.245899	-0.0179602
ENSMUSG00000032431.6	Crtap	198.655	0.478811	0.411825	-1.16266	0.244968	0.729861	1.68935	1.79858	2.06527	2.08779	1.88995	2.64765
ENSMUSG00000020326.7	Ccng1	743.14	-0.262069	0.227932	1.14977	0.250238	0.733596	-1.70069	-1.67938	-2.26303	-1.97359	-2.35943	-2.33863
ENSMUSG00000015750.15	Aph1a	333.966	-0.336687	0.294136	1.14466	0.252348	0.734381	-1.69073	-0.74744	-1.64732	-1.81954	-2.17156	-1.3583
ENSMUSG00000061119.7	Prcp	311.088	0.376765	0.329839	-1.14227	0.253342	0.735378	1.13671	1.97917	1.51165	2.38553	1.64797	1.2789
ENSMUSG00000021820.18	Camk2g	1901.45	-0.227702	0.203195	1.12061	0.262455	0.745917	0.229373	0.556784	0.36044	-0.211126	0.21035	0.173359
ENSMUSG00000036427.5	Gpi1	5034.46	0.196737	0.176182	-1.11667	0.264135	0.747981	0.471072	0.261194	0.545597	0.452765	0.628275	0.525678
ENSMUSG00000015149.14	Sirt2	3196.17	0.209154	0.191104	-1.09445	0.273757	0.756771	0.741206	0.653619	0.275651	0.290324	0.643975	1.06284
ENSMUSG00000071644.10	Eef1g	1526.05	0.210304	0.19438	-1.08192	0.279288	0.760436	-1.80421	-1.6615	-1.62135	-1.36892	-1.82025	-1.53756
ENSMUSG00000032178.14	Ilf3	1187.23	-0.191223	0.176847	1.08129	0.27957	0.760891	-0.173693	-0.460078	-0.27003	-0.571648	-0.391366	-0.810677
ENSMUSG00000030034.11	Ino80b	131.41	0.498834	0.466905	-1.06839	0.285347	0.762822	1.08271	-0.0919752	1.53043	1.82636	0.820289	1.40167
ENSMUSG00000040725.13	Hnrnpul1	1539.87	-0.160999	0.156068	1.0316	0.302261	0.773193	-0.0248187	-0.0561356	-0.0643005	-0.375163	-0.385103	-0.15964
ENSMUSG00000015759.11	Cnih1	1380.95	0.211714	0.209801	-1.00912	0.312918	0.781942	0.662446	0.667206	0.801156	0.905545	0.61184	0.988461
ENSMUSG00000021660.14	Btf3	1299.73	-0.196595	0.209185	0.939815	0.347312	0.806876	0.690233	0.293163	-0.0925754	0.279981	-0.15003	-0.119253
ENSMUSG00000030314.16	Atg7	454.394	-0.17345	0.187745	0.923857	0.355561	0.81211	0.787239	0.935477	0.726981	0.293964	0.589117	0.754522
ENSMUSG00000031532.6	Saraf	3909.46	0.160115	0.173903	-0.920716	0.357199	0.812916	1.28293	1.40405	1.33273	1.42038	1.22638	1.57159
ENSMUSG00000062683.11	Atp5g2	609.855	0.186813	0.203488	-0.918055	0.35859	0.813301	-0.213757	-0.0267329	0.187814	-0.126917	-0.0390038	0.432715
ENSMUSG00000036099.16	Vezt	948.956	0.142694	0.159881	-0.892503	0.372123	0.818693	-1.37579	-1.55735	-1.50901	-1.31962	-1.48379	-1.47808
ENSMUSG00000066979.6	Bub3	1336.85	-0.138804	0.15699	0.88416	0.37661	0.819982	0.547511	0.974079	0.783733	0.733305	0.446285	0.445939
ENSMUSG00000029621.14	Arpc1a	2002.28	-0.166031	0.190092	0.873425	0.382431	0.823499	1.03634	1.25726	1.10331	0.549302	1.07979	0.984889
ENSMUSG00000032114.9	Slc37a4	238.848	0.314936	0.364654	-0.863657	0.387776	0.827087	-0.239255	-0.674635	0.65333	0.0217912	0.164151	0.590254
ENSMUSG00000040618.7	Pck2	611.55	-0.210957	0.248463	0.849047	0.395855	0.831487	0.115969	-0.223875	0.259391	-0.484769	-0.348315	0.146787
ENSMUSG00000040907.15	Atp1a3	61276.1	0.188358	0.227461	-0.828091	0.407619	0.839289	2.09769	1.78117	2.42525	2.02568	2.55158	1.99269
ENSMUSG00000005566.14	Trim28	3015.32	-0.161635	0.196153	0.824023	0.409927	0.840092	0.802757	1.29833	1.24172	0.697099	0.854373	1.05691
ENSMUSG00000033436.13	Armcx2	880.223	0.129769	0.158733	-0.817525	0.413629	0.841205	-0.120269	-0.382225	-0.151951	-0.266859	0.00285064	-0.299625
ENSMUSG00000031167.16	Rbm3	1089.57	-0.283132	0.349564	0.809959	0.417964	0.842737	-1.08169	-1.42558	-0.719802	-1.85971	-1.2485	-0.966563
ENSMUSG00000027673.12	Ndufb5	2399.44	0.110429	0.140154	-0.787907	0.430751	0.849063	1.94663	2.25743	1.84136	2.09656	1.84871	2.1513
ENSMUSG00000029580.14	Actb	25514.9	0.117023	0.149955	-0.780388	0.435163	0.85155	2.3386	2.52373	2.74177	2.45358	2.60663	2.63877
ENSMUSG00000027170.12	Eif3m	915.521	0.14684	0.188744	-0.777986	0.436577	0.851704	0.0838202	0.0756571	0.0654446	0.305734	0.0498728	0.00416855
ENSMUSG00000050953.10	Gja1	5773.88	0.220919	0.28459	-0.776271	0.437589	0.852802	0.221405	1.05495	0.690737	0.585405	0.615858	1.21195
ENSMUSG00000059498.13	Fcgr3	78.9367	0.487583	0.640129	-0.761696	0.446242	0.857974	0.159941	#NAME?	-0.470269	-0.701552	-1.13202	0.230607
ENSMUSG00000018882.12	Mrpl45	584.82	-0.129065	0.170177	0.758414	0.448203	0.85903	0.165642	0.385719	0.417701	0.23468	0.174214	-0.110899
ENSMUSG00000026728.9	Vim	3181.68	-0.244213	0.329954	0.740141	0.459214	0.863489	0.0571128	0.970206	1.48758	0.575077	0.46906	0.57503
ENSMUSG00000003031.14	Cdkn1b	2340.71	0.149165	0.206979	-0.720678	0.471108	0.867115	-0.374195	-0.0333474	-0.109845	0.10934	-0.314685	-0.11739
ENSMUSG00000022186.14	Oxct1	6725.81	0.13061	0.181109	-0.721167	0.470806	0.867115	-0.150241	-0.366062	-0.440282	-0.106739	-0.108609	-0.656508
ENSMUSG00000043061.10	Tmem18	534.206	0.170255	0.243769	-0.69843	0.484908	0.870661	-1.48068	-1.01979	-0.734484	-1.146	-0.837185	-0.883917
ENSMUSG00000020570.15	Sypl	1192.45	0.152843	0.219203	-0.697267	0.485635	0.871232	0.538082	0.921403	0.647165	1.1146	0.607583	0.510942
ENSMUSG00000025810.9	Nrp1	454.187	0.160544	0.230556	-0.696333	0.48622	0.871232	1.63115	1.86178	1.11955	1.85642	1.64757	1.2839
ENSMUSG00000027108.15	Ola1	1560.26	-0.166066	0.240705	0.689913	0.490249	0.873511	0.822614	0.786008	0.583733	0.869699	0.509488	-0.0777367
ENSMUSG00000031627.9	Irf2	272.444	0.221994	0.325992	-0.680979	0.495885	0.875287	0.353026	-0.829249	-0.228801	0.349376	-0.0308146	-0.546427
ENSMUSG00000019432.15	Ddx39b	2395.67	0.110958	0.164716	-0.673633	0.500545	0.879286	0.311241	0.21547	0.170314	0.214959	0.219448	0.325461
ENSMUSG00000027828.12	Ssr3	2829.05	0.0759032	0.114626	-0.662183	0.507854	0.883604	-0.123179	-0.105639	-0.125108	-0.105434	-0.100547	-0.199541
ENSMUSG00000037254.18	Itih2	226.171	0.302609	0.461466	-0.655754	0.511982	0.88515	0.232367	1.65757	0.887686	1.7044	0.361527	1.42893
ENSMUSG00000028524.21	Sgip1	2130.07	-0.0972178	0.149978	0.648212	0.516848	0.886663	0.0547404	0.0683025	-0.315703	-0.268106	-0.0844744	-0.401646
ENSMUSG00000024248.14	Cox7a2l	700.58	0.180874	0.282094	-0.641183	0.521404	0.887835	-1.94857	-1.73731	-1.91859	-2.53682	-1.83293	-1.16126
ENSMUSG00000027206.13	Cops2	1758.73	-0.1717	0.277492	0.618757	0.536077	0.891792	0.387912	-0.102935	-0.268551	0.143393	-0.221565	-0.834744
ENSMUSG00000027423.15	Snx5	1227.58	0.110356	0.184507	-0.598112	0.549765	0.896096	-0.353939	-0.466676	-0.580872	-0.261926	-0.467137	-0.669889
ENSMUSG00000032328.12	Tmem30a	6611.64	0.100171	0.168733	-0.593665	0.552736	0.897007	0.0757841	0.0808736	-0.122785	0.258877	0.0460327	-0.288427
ENSMUSG00000028034.15	Fubp1	1967.23	0.140625	0.2415	-0.582297	0.560366	0.900044	-0.615697	-0.952829	-1.3098	-0.499469	-1.02654	-1.24158
ENSMUSG00000029657.15	Hsph1	2270.94	0.190096	0.328227	-0.57916	0.562481	0.900568	0.00392862	-0.0752359	-0.177481	0.901414	-0.20794	-0.724143
ENSMUSG00000000958.10	Slc7a7	40.583	-0.419618	0.742632	0.565042	0.572045	0.905149	-0.0440865	-1.71191	-2.38679	-0.579728	-2.90462	-2.66161
ENSMUSG00000027822.16	Slc33a1	801.252	-0.0956668	0.174142	0.54936	0.582758	0.907215	1.17666	1.10271	0.541848	0.747128	0.703825	0.795118
ENSMUSG00000001036.17	Epn2	1877.13	-0.0697695	0.130061	0.536436	0.591657	0.910229	-0.822498	-0.686116	-0.628943	-0.869249	-0.914127	-0.835665
ENSMUSG00000007097.14	Atp1a2	22619.1	0.128524	0.241317	-0.532591	0.594316	0.910807	0.415544	0.792372	0.483629	0.526261	0.31281	0.932523
ENSMUSG00000039536.16	Stau1	1009.91	-0.110686	0.211483	0.523382	0.600709	0.913384	-0.36179	-0.244398	0.0518183	-0.194209	-0.347493	-0.672494
ENSMUSG00000004233.14	Wars2	118.575	0.192752	0.378003	-0.509923	0.610105	0.91623	-1.57248	-0.00354612	-0.336881	-0.515765	-0.272112	-0.572928
ENSMUSG00000025245.14	Lztfl1	656.363	-0.18568	0.365814	0.50758	0.611748	0.917203	-1.05437	-2.5042	-1.74824	-1.59316	-1.83946	-2.44949
ENSMUSG00000025439.5	Clns1a	835.82	0.101487	0.207163	-0.489889	0.624213	0.921573	0.120651	0.520776	0.0370988	0.244283	0.127977	0.339372
ENSMUSG00000018446.8	C1qbp	1019.9	0.095266	0.202777	-0.469808	0.638492	0.925867	1.33076	0.956227	1.35715	1.41553	1.2334	1.01616
ENSMUSG00000031785.16	Adgrg1	1566.67	0.132478	0.283681	-0.466995	0.640504	0.926517	1.54272	1.74098	1.59474	1.0439	1.47517	2.40031
ENSMUSG00000062867.13	Impdh2	515.919	0.0872588	0.18893	-0.461858	0.644183	0.927358	-1.28219	-0.76004	-0.822772	-0.785724	-1.00738	-1.07037
ENSMUSG00000022234.15	Cct5	2902.06	-0.0926897	0.202261	0.458269	0.646759	0.928816	0.906807	0.811897	0.593114	0.890257	0.487563	0.306642
ENSMUSG00000020075.8	Ddx21	608.133	-0.187645	0.41435	0.452866	0.650646	0.929459	-0.231887	-1.23211	-0.7682	-0.215619	-1.25057	-1.79953
ENSMUSG00000035776.14	Cd99l2	1024.68	-0.0715383	0.158118	0.452436	0.650955	0.929459	-0.494558	-0.226305	-0.660713	-0.480793	-0.714296	-0.653905
ENSMUSG00000013593.12	Ndufs2	3914.45	-0.0492063	0.111582	0.440989	0.659221	0.931186	0.843608	0.945473	0.737081	0.727028	0.645998	0.718637
ENSMUSG00000032312.7	Csk	349.469	-0.100294	0.22737	0.441106	0.659136	0.931186	-0.173242	0.0758258	0.0678924	-0.423863	-0.246088	0.0105664
ENSMUSG00000020402.11	Vdac1	5438.14	0.100483	0.239648	-0.419292	0.675002	0.936152	0.462902	0.304759	0.703628	0.474583	0.77006	0.207331
ENSMUSG00000066357.6	Wdr6	2446.13	-0.104828	0.257923	0.406432	0.684425	0.937957	0.850646	0.838742	1.20045	0.204483	0.930784	1.13502
ENSMUSG00000025410.10	Dctn2	4114.33	-0.0525145	0.131648	0.398902	0.689966	0.938059	0.74812	0.79425	0.764209	0.549182	0.740065	0.57928
ENSMUSG00000041559.7	Fmod	617.457	-0.166403	0.42084	0.395408	0.692542	0.938978	0.657705	1.12793	1.06763	0.744094	-0.00371772	1.12422
ENSMUSG00000021929.9	Kpna3	1353.82	-0.115164	0.299458	0.384575	0.700552	0.941717	0.0913829	-0.316687	-0.122488	0.128684	-0.182658	-1.09885
ENSMUSG00000022884.15	Eif4a2	7536.64	-0.0588409	0.156252	0.376576	0.706489	0.944421	-0.292374	-0.165251	-0.65498	-0.332499	-0.597975	-0.663022
ENSMUSG00000004267.16	Eno2	10723.3	0.0873902	0.233043	-0.374996	0.707664	0.944843	0.607645	0.663576	0.616731	0.437038	0.912928	0.461038
ENSMUSG00000022336.3	Eif3e	1255.74	0.0770955	0.210814	-0.365704	0.714586	0.944978	0.342961	0.287244	-0.253864	0.403603	-0.0249092	-0.0892762
ENSMUSG00000030662.10	Ipo5	2731.2	-0.0671311	0.189077	0.355047	0.722554	0.94573	0.552003	0.29087	0.583882	0.495577	0.409449	0.0742471
ENSMUSG00000023021.15	Cers5	752.152	0.0708574	0.198498	-0.356969	0.721115	0.94573	0.124468	0.526386	-0.0818785	0.287074	-0.0501586	0.272991
ENSMUSG00000027550.14	Lrrcc1	433.942	0.133145	0.39379	-0.338112	0.735278	0.94835	-1.10319	-2.43722	-1.51642	-1.27243	-1.25414	-2.18904
ENSMUSG00000027680.15	Fxr1	1039.36	0.0918814	0.277117	-0.331562	0.74022	0.949482	-0.0107438	-0.175808	-0.446404	0.269682	-0.265734	-0.785157
ENSMUSG00000031691.14	Tnpo2	2255.9	-0.0573935	0.173954	0.329935	0.741449	0.949741	0.521809	0.502265	0.739716	0.133407	0.69143	0.459884
ENSMUSG00000020572.8	Nampt	1525.33	0.0985108	0.304437	-0.323584	0.746253	0.950929	-0.619086	-0.547568	-0.290751	0.0705897	-0.547475	-1.09302
ENSMUSG00000063446.4	Plppr1	78.0641	0.164861	0.532799	-0.309425	0.756998	0.953811	1.18947	1.34054	-0.128363	-0.199483	0.849866	1.40322
ENSMUSG00000020460.15	Rps27a	1060.05	0.0921335	0.316684	-0.290932	0.771103	0.957677	-1.10028	-1.12581	-1.09928	-0.626375	-1.69151	-1.22414
ENSMUSG00000016087.13	Fli1	108.917	-0.138669	0.478107	0.290037	0.771788	0.957857	2.0978	1.1223	1.86694	2.26055	1.12535	0.745957
ENSMUSG00000007564.15	Ppp2r1a	9150.5	-0.0447259	0.157575	0.283838	0.776534	0.959398	1.07165	0.98595	1.39273	0.903406	1.14826	1.00482
ENSMUSG00000038271.17	Iffo1	678.176	-0.0671682	0.249237	0.269495	0.787549	0.961195	-0.497313	-0.477104	-0.324202	-0.996912	-0.289641	-0.478179
ENSMUSG00000035150.15	Eif2s3x	879.734	-0.0720872	0.270757	0.266243	0.790052	0.961977	-1.43313	-1.01922	-1.20184	-1.10484	-1.19985	-1.79862
ENSMUSG00000070880.10	Gad1	9691.3	0.0995763	0.386289	-0.257777	0.796579	0.963003	0.179884	-0.587836	0.660164	-0.0965532	0.735546	-0.294941
ENSMUSG00000043008.9	Klhl6	44.5012	0.155512	0.608977	-0.255366	0.79844	0.964017	1.02753	-1.39626	0.0970462	0.707024	0.525996	-0.142086
ENSMUSG00000059447.13	Hadhb	1035.59	-0.046074	0.181048	0.254485	0.799121	0.964451	-0.687276	-0.458381	-0.63301	-0.424159	-0.907508	-0.896936
ENSMUSG00000026878.17	Rab14	2921.64	0.054975	0.224833	-0.244515	0.806832	0.966147	-0.492795	-0.746485	-0.367885	-0.364204	-0.422028	-0.948579
ENSMUSG00000059883.16	Irak4	42.9567	-0.115223	0.503202	0.22898	0.818884	0.967363	0.362875	0.807167	0.180415	-0.462653	0.714235	0.34334
ENSMUSG00000031146.6	Plp2	49.8817	-0.167881	0.736474	0.227952	0.819684	0.967383	1.6262	-0.30831	-1.83318	-0.367252	-0.169325	0.519392
ENSMUSG00000066232.4	Ipo7	3344.99	0.0498203	0.223295	-0.223115	0.823446	0.967651	0.37918	0.0710659	0.235178	0.602425	0.222473	-0.302462
ENSMUSG00000030798.15	Cd37	36.3311	-0.140922	0.656579	0.21463	0.830056	0.969576	0.00509692	1.54888	0.977172	0.718561	-0.0580151	0.96783
ENSMUSG00000022403.15	St13	2631.21	0.0431619	0.235569	-0.183224	0.854622	0.972236	-0.0396202	-0.0731649	0.0268584	0.323758	-0.0360615	-0.606713
ENSMUSG00000056234.15	Ncoa4	766.921	-0.029882	0.166491	0.179481	0.85756	0.973249	-1.13447	-1.41083	-1.42805	-1.48075	-1.36174	-1.49792
ENSMUSG00000026185.8	Igfbp5	2445.35	-0.0485509	0.29118	0.166739	0.867576	0.975187	-0.981328	-0.374351	-0.868308	-0.829339	-1.29525	-0.51305
ENSMUSG00000005683.8	Cs	4128.63	-0.032632	0.20573	0.158615	0.873972	0.976106	0.113839	0.291301	0.770693	0.202679	0.455504	0.15575
ENSMUSG00000026480.12	Ncf2	36.1171	-0.12804	0.915717	0.139825	0.888799	0.978049	-0.250222	-2.86398	#NAME?	-0.683565	-1.69844	-3.19895
ENSMUSG00000018167.10	Stard3	355.8	0.038241	0.2728	-0.140179	0.888518	0.978049	0.284108	0.545158	0.805246	0.349204	0.124232	0.928634
ENSMUSG00000020109.13	Dnajb12	674.338	0.030673	0.214954	-0.142696	0.88653	0.978049	0.777758	1.14632	0.764022	0.783815	0.759315	0.996439
ENSMUSG00000028452.7	Vcp	2849.16	0.0328153	0.241445	-0.135912	0.891891	0.978257	-1.27413	-1.66292	-1.02239	-1.21642	-1.19047	-1.75956
ENSMUSG00000029642.11	Polr1d	554.363	-0.0356812	0.270752	0.131786	0.895154	0.978842	-0.0645281	0.535983	-0.450044	0.302467	-0.491265	-0.132487
ENSMUSG00000031712.10	Il15	11.7153	-0.162973	1.30454	0.124928	0.900581	0.98026	-0.225732	#NAME?	-2.49815	-1.15293	#NAME?	-2.10017
ENSMUSG00000036249.16	Rbm43	220.365	0.0354584	0.325168	-0.109046	0.913166	0.982177	-0.403597	-1.03362	-0.407015	-0.574303	-0.267659	-1.37933
ENSMUSG00000058799.16	Nap1l1	1563.34	0.0246293	0.247878	-0.0993605	0.920852	0.983391	-1.07587	-1.73004	-1.85088	-1.48135	-1.60177	-1.77287
ENSMUSG00000034708.11	Grn	2281.23	0.0241578	0.253212	-0.0954057	0.923993	0.984161	1.76581	2.10406	1.9028	1.63955	1.54813	2.30751
ENSMUSG00000025980.14	Hspd1	2045.94	0.0254714	0.292608	-0.0870494	0.930632	0.985039	-1.0054	-1.83072	-1.47341	-0.998452	-1.5229	-1.97885
ENSMUSG00000022235.15	Cmbl	93.6978	-0.0297479	0.516973	0.0575426	0.954113	0.991152	-0.218889	1.72585	0.64333	1.3849	0.0648651	0.682151
ENSMUSG00000046519.15	Golph3l	445.365	-0.0147082	0.282625	0.0520413	0.958496	0.99202	-0.887405	-0.580445	-0.602132	-0.327944	-0.699105	-1.49762
ENSMUSG00000026483.13	Fam129a	227.51	-0.0232411	0.45348	0.0512505	0.959126	0.99202	0.307083	-1.20744	-0.0799868	0.423115	-0.493228	-0.749998
ENSMUSG00000057666.18	Gapdh	3896.56	-0.0141174	0.287931	0.0490304	0.960895	0.992288	-2.3653	-2.39804	-3.24445	-2.90304	-2.36652	-3.01586
ENSMUSG00000025428.15	Atp5a1	19634.5	-0.0107536	0.230008	0.0467533	0.96271	0.992826	0.794091	0.557574	1.07974	0.801842	0.882032	0.461747
ENSMUSG00000029247.17	Paics	1770.45	0.00610083	0.194776	-0.0313223	0.975012	0.994501	0.101963	-0.032736	-0.202721	0.117382	-0.119074	-0.444834
ENSMUSG00000056486.18	Chn1	1916.74	0.00870241	0.288003	-0.0302164	0.975894	0.994522	0.522929	0.0838019	0.624513	0.194063	0.785361	-0.0731677
ENSMUSG00000069539.11	Scyl2	727.037	0.00466539	0.228844	-0.0203867	0.983735	0.996689	-0.310643	-0.4252	-0.204581	-0.255928	-0.163308	-0.897096
ENSMUSG00000041560.12	Nop53	766.893	-0.00388368	0.249149	0.0155878	0.987563	0.997385	0.023488	0.331996	-0.0603257	0.342125	-0.0702716	-0.337818
ENSMUSG00000000787.12	Ddx3x	5966.43	0.00341805	0.279417	-0.0122328	0.99024	0.997593	-1.25756	-0.645261	-0.701717	-0.578707	-0.668772	-1.55335
ENSMUSG00000022890.13	Atp5j	3480.36	0.380741	0.127912	-2.97658	0.00291482	0.162453	1.44772	1.7869	1.47656	1.83997	1.78474	1.96251
ENSMUSG00000031849.9	Comp	68.9428	2.94422	0.992338	-2.96695	0.00300768	0.163595	0.617324	2.49076	1.31202	3.36891	5.43039	2.47163
ENSMUSG00000018707.13	Dync1h1	7615.67	-0.587892	0.198417	2.96291	0.00304749	0.163595	0.305491	-0.138413	0.340524	-0.310402	-0.546517	-0.696087
ENSMUSG00000066415.4	Msl2	835.231	-0.830676	0.280208	2.9645	0.00303174	0.163595	-0.83896	-0.384674	-1.30634	-1.78044	-1.51258	-1.88823
ENSMUSG00000053062.16	Jam2	1227.21	0.590673	0.19916	-2.96582	0.00301875	0.163595	-0.729453	-0.863571	-0.681832	-0.0681785	-0.449495	-0.275797
ENSMUSG00000062861.8	Zfp28	101.136	1.67293	0.564712	-2.96244	0.00305211	0.163595	-2.68494	-5.15287	-3.97886	-2.17696	-2.67517	-1.36529
ENSMUSG00000013787.15	Ehmt2	1262.65	-0.472203	0.159318	2.9639	0.00303763	0.163595	-0.18162	-0.0432035	-0.314847	-1.03397	-0.665265	-0.533042
ENSMUSG00000031513.8	Leprotl1	1358.81	-0.557615	0.188334	2.96077	0.00306867	0.163893	-0.253519	0.0503335	-0.1017	-0.643492	-0.955042	-0.660751
ENSMUSG00000047098.18	Rnf31	342.201	-0.587254	0.198644	2.95632	0.00311331	0.164321	-0.168266	0.297224	0.0477558	-0.78792	-0.707361	-0.363975
ENSMUSG00000042371.12	Slc5a10	3.24539	-7.86748	2.6626	2.95481	0.00312865	0.164321	4.61148	7.52304	#NAME?	#NAME?	#NAME?	2.32713
ENSMUSG00000051331.15	Cacna1c	1022.45	-0.938313	0.317184	2.95827	0.00309375	0.164321	-0.576795	-0.658277	-1.18401	-2.04231	-2.0049	-1.4976
ENSMUSG00000050549.8	Fam241a	32.6209	1.98768	0.672596	-2.95524	0.00312426	0.164321	#NAME?	-1.26415	-0.836108	0.769289	0.281144	0.375618
ENSMUSG00000038383.16	Pigu	608.108	0.426091	0.144218	-2.95449	0.00313182	0.164321	1.1828	1.34028	1.21745	1.55969	1.58365	1.60047
ENSMUSG00000050912.15	Tmem123	615.803	0.60093	0.203576	-2.95187	0.00315856	0.164565	0.131817	-0.465968	-0.236407	0.479096	0.3305	0.219082
ENSMUSG00000031444.16	F10	2.81853	-9.22525	3.12435	2.95269	0.00315017	0.164565	#NAME?	7.52304	#NAME?	#NAME?	#NAME?	#NAME?
ENSMUSG00000038943.16	Prc1	57.4075	2.2282	0.755601	-2.94891	0.00318901	0.165045	-2.84598	#NAME?	-3.7605	-1.13737	-1.92596	-1.78784
ENSMUSG00000032492.14	Pth1r	111.015	1.0547	0.35767	-2.94882	0.00318992	0.165045	-0.807163	-0.377956	-0.752624	0.0430229	0.367624	0.577577
ENSMUSG00000052833.9	Sae1	998.853	-0.427024	0.144894	2.94715	0.00320719	0.165318	0.566769	0.458659	0.208006	-0.0304226	-0.162806	-0.118803
ENSMUSG00000020672.14	Sntg2	8.76459	-4.17113	1.41578	2.94617	0.00321738	0.165318	5.62545	3.62586	4.0209	#NAME?	0.809958	1.73031
ENSMUSG00000003814.8	Calr	9134.95	0.582754	0.197955	-2.94386	0.00324142	0.165981	1.62104	1.61955	0.960851	2.01922	1.56215	2.04184
ENSMUSG00000032641.18	Gpr19	224.75	0.71874	0.244373	-2.94116	0.00326982	0.166862	0.337369	0.298813	0.271827	0.567114	0.88808	1.26535
ENSMUSG00000034610.14	Tut4	837.037	-0.563633	0.192014	2.93538	0.00333139	0.168317	-0.337344	-0.673722	-1.00517	-1.15373	-1.42668	-1.34688
ENSMUSG00000078656.11	Vps25	586.31	1.28263	0.436889	-2.93582	0.00332669	0.168317	5.70461	6.39312	5.93786	7.89714	6.58369	7.37867
ENSMUSG00000030116.14	Mfap5	26.1883	2.55367	0.869984	-2.9353	0.00333224	0.168317	0.566087	-1.08989	-1.55357	1.65442	1.14676	2.45993
ENSMUSG00000005397.8	Nid1	1823.36	0.844032	0.288049	-2.93016	0.00338783	0.169475	0.02608	0.509722	0.905401	1.78285	1.04796	0.877839
ENSMUSG00000038056.15	Kmt2c	2337.4	-1.04492	0.35675	2.92899	0.00340065	0.169475	-0.978647	-1.1217	-2.00285	-2.4947	-2.48338	-2.31443
ENSMUSG00000028128.13	F3	849.244	0.775112	0.264589	-2.9295	0.0033951	0.169475	0.822249	0.558974	0.317266	1.24003	0.785387	1.61423
ENSMUSG00000036550.16	Cnot1	2576.72	-0.550115	0.187766	2.92979	0.00339196	0.169475	-0.236154	-0.20589	-0.437093	-0.926377	-0.741218	-1.13185
ENSMUSG00000000805.18	Car4	2124.6	1.21064	0.413785	-2.92576	0.00343615	0.170106	0.0491673	0.976698	0.392311	2.3446	1.0336	1.10556
ENSMUSG00000032184.5	Lysmd2	600.938	0.591266	0.202038	-2.9265	0.00342795	0.170106	0.308291	-0.00959539	0.0133879	0.32287	0.66488	0.762288
ENSMUSG00000019850.11	Tnfaip3	59.5387	-1.62662	0.558231	2.91388	0.00356972	0.17018	0.454458	0.700927	0.605892	-0.904928	-1.02865	-1.32277
ENSMUSG00000046491.10	C1qtnf2	26.7265	2.1474	0.735792	-2.91848	0.00351738	0.17018	-2.3789	-1.79597	0.590733	1.68526	0.869975	1.95453
ENSMUSG00000066197.5	Gpr139	49.7293	-1.47942	0.506946	2.9183	0.00351942	0.17018	1.78869	1.69121	1.43243	0.00658394	-0.03415	0.340802
ENSMUSG00000029632.7	Ndufa4	5557.44	0.646726	0.221651	-2.91777	0.00352543	0.17018	1.77689	1.57311	1.88377	2.25466	2.37438	2.31686
ENSMUSG00000034570.12	Inpp5j	1756.91	-0.354637	0.1217	2.91402	0.00356808	0.17018	0.241448	0.356765	0.440626	-0.147009	-0.0523487	-0.106335
ENSMUSG00000019301.5	Hsd17b1	32.6033	4.13438	1.41907	-2.91344	0.00357469	0.17018	#NAME?	#NAME?	#NAME?	0.476092	-0.754566	0.675793
ENSMUSG00000039852.17	Rere	2202.08	-0.441194	0.150863	2.92447	0.00345045	0.17018	-0.600803	-0.367625	-0.526832	-1.1809	-0.956866	-0.952178
ENSMUSG00000035649.17	Zcchc7	474.288	-0.854922	0.292562	2.92219	0.0034758	0.17018	-2.44597	-2.33088	-3.19646	-3.46511	-3.79515	-3.51844
ENSMUSG00000073427.4	Gm4924	94.081	-1.37506	0.4714	2.91697	0.0035345	0.17018	-1.65139	-0.784796	-1.76897	-2.98391	-2.86036	-2.54829
ENSMUSG00000037579.7	Kcnh3	76.1807	1.22483	0.419751	-2.91799	0.00352297	0.17018	-1.75028	-0.998908	-1.30582	-0.00103106	-0.125118	-0.417395
ENSMUSG00000047945.6	Marcksl1	862.569	0.633355	0.216907	-2.91994	0.00350104	0.17018	0.0566235	-0.164237	-0.0897967	-0.000178917	0.570245	0.856203
ENSMUSG00000033849.3	B3galt2	394.483	0.917154	0.315115	-2.91054	0.00360809	0.171223	0.127355	-0.923035	-0.688886	0.405647	0.478437	0.115655
ENSMUSG00000028245.15	Nsmaf	675.03	-0.770687	0.265009	2.90816	0.00363565	0.171983	-1.21267	-0.417041	-1.21498	-2.17387	-1.77312	-1.40934
ENSMUSG00000034557.14	Zfyve9	2224.68	-0.577862	0.199092	2.90248	0.00370219	0.174204	0.107359	-0.161926	-0.104643	-0.835851	-0.504749	-0.84796
ENSMUSG00000025962.15	Fastkd2	296.588	-0.821643	0.283114	2.90216	0.00370596	0.174204	-0.00150305	0.284731	-0.467919	-0.742974	-0.693895	-1.52126
ENSMUSG00000078864.10	Gm14322	42.9917	-2.12613	0.733623	2.89813	0.00375394	0.174805	-1.08182	-0.688918	-3.33913	-3.96319	-3.73782	-3.22093
ENSMUSG00000070493.3	Chchd2	1146.09	0.620181	0.213989	-2.89819	0.00375319	0.174805	-1.87052	-1.47275	-1.30819	-0.840491	-1.21581	-0.91744
ENSMUSG00000035139.14	Secisbp2	324.098	-0.581779	0.200691	2.89889	0.00374492	0.174805	0.0804025	-0.239975	-0.35602	-0.795742	-0.667188	-1.11405
ENSMUSG00000031168.14	Ebp	775.366	0.743113	0.257045	-2.89099	0.00384034	0.174863	0.847384	1.42872	1.50037	2.29066	1.75504	1.7494
ENSMUSG00000075284.10	Wipf1	191.372	1.06391	0.367787	-2.89273	0.00381911	0.174863	-1.9254	-2.60203	-1.32963	-1.19074	-0.948653	-0.509831
ENSMUSG00000020733.3	Slc9a3r1	774.085	0.684348	0.236776	-2.89027	0.00384908	0.174863	-0.151518	-0.140428	0.0554222	0.674246	0.0419513	0.739557
ENSMUSG00000036586.6	Grifin	4.36494	5.38158	1.86055	-2.89247	0.0038223	0.174863	#NAME?	#NAME?	#NAME?	-0.0300816	2.64677	4.72523
ENSMUSG00000028188.13	Spata1	26.7508	-2.96563	1.02539	2.89221	0.0038254	0.174863	-3.33914	0.583425	-3.019	-4.47886	#NAME?	-2.95849
ENSMUSG00000020658.10	Efr3b	2925.62	-0.396737	0.137558	2.88414	0.00392488	0.175564	-0.547619	-0.636934	-0.497518	-1.29695	-0.880838	-0.990908
ENSMUSG00000036591.16	Arhgap21	3134.33	-0.679804	0.237044	2.86784	0.00413286	0.175564	-1.26685	-1.21225	-1.9749	-2.28865	-2.25654	-2.12314
ENSMUSG00000005886.14	Ncoa2	1733.1	-0.491261	0.170772	2.87671	0.00401842	0.175564	-0.474432	-0.665162	-0.45641	-1.18068	-0.871639	-1.29153
ENSMUSG00000039774.12	Galnt12	10.5292	3.97711	1.38405	-2.87353	0.0040591	0.175564	#NAME?	#NAME?	#NAME?	0.92273	-0.94245	0.225036
ENSMUSG00000034880.7	Mrpl34	468.214	0.780247	0.270942	-2.87976	0.00397982	0.175564	1.68786	2.19236	2.12092	2.67445	2.56999	2.86003
ENSMUSG00000012535.14	Tnpo3	1111.74	-0.560259	0.195116	2.87141	0.00408643	0.175564	0.0129147	0.258103	-0.248936	-0.790016	-0.520528	-0.619562
ENSMUSG00000034667.8	Xpot	1440.75	-0.644724	0.223797	2.88084	0.0039662	0.175564	-0.775251	-0.800769	-1.24798	-1.72591	-1.72167	-1.5566
ENSMUSG00000026361.9	Cdc73	914.092	-0.67339	0.233493	2.88398	0.00392686	0.175564	-0.712542	-0.671122	-1.07081	-1.27383	-1.46791	-2.07874
ENSMUSG00000044367.7	Slc16a13	92.843	1.09348	0.381319	-2.86762	0.00413569	0.175564	-0.786149	-0.622355	-0.3445	0.355968	0.0696046	0.754495
ENSMUSG00000039252.11	Lgi2	1796.45	-0.588168	0.20395	2.88388	0.00392811	0.175564	0.0266858	-0.747624	-0.605299	-1.11604	-0.965992	-1.23988
ENSMUSG00000020846.6	Rflnb	488.708	0.681116	0.236021	-2.88582	0.00390389	0.175564	-1.06456	-1.36964	-1.81563	-0.619443	-1.09166	-0.749095
ENSMUSG00000026344.9	Lypd1	184.2	-0.884298	0.308487	2.86656	0.00414953	0.175564	1.30859	0.906767	0.796181	-0.527034	-0.0268105	0.459521
ENSMUSG00000037706.17	Cd81	13128.5	0.533637	0.186323	-2.86405	0.00418262	0.175564	2.07904	2.30198	2.28602	2.46295	2.50705	2.99563
ENSMUSG00000005371.15	Fbxo11	2129.98	-0.548184	0.19017	2.8826	0.00394407	0.175564	-0.113794	-0.276211	-0.693816	-0.789855	-0.955744	-1.25084
ENSMUSG00000029777.10	Gars	3974.01	-0.492665	0.171504	2.87261	0.00407097	0.175564	1.06345	0.734909	0.999837	0.550984	0.289157	0.230128
ENSMUSG00000034265.8	Zdhhc14	1049.49	0.486168	0.169113	-2.8748	0.00404279	0.175564	0.016329	-0.182157	0.216234	0.294885	0.620312	0.297989
ENSMUSG00000055839.6	Elob	1303.82	0.778708	0.271492	-2.86826	0.00412743	0.175564	0.545734	0.541005	1.0182	1.29372	0.997464	1.84856
ENSMUSG00000054716.4	Zfp771	268.347	0.856026	0.297361	-2.87874	0.00399262	0.175564	1.8739	2.58839	2.49125	3.35983	2.82139	3.03926
ENSMUSG00000090223.2	Pcp4	790.974	0.967655	0.337849	-2.86416	0.0041811	0.175564	-3.73479	-5.14954	-4.07539	-4.17754	-2.87498	-3.11138
ENSMUSG00000039501.14	Znfx1	844.124	-0.51337	0.178715	2.87256	0.0040716	0.175564	0.248276	0.116659	-0.133522	-0.412734	-0.612454	-0.533969
ENSMUSG00000040325.16	Dcaf1	714.882	-0.559562	0.194674	2.87436	0.00404852	0.175564	0.270353	0.315725	0.181729	-0.14938	-0.463286	-0.563828
ENSMUSG00000015476.6	Prrt1	1984.98	0.824631	0.28623	-2.881	0.00396411	0.175564	0.0593403	0.58793	0.656926	0.890232	1.11596	1.5315
ENSMUSG00000031972.5	Acta1	99.2684	1.34023	0.467224	-2.8685	0.00412428	0.175564	0.890308	2.26856	1.55551	2.96902	2.17906	3.1609
ENSMUSG00000040434.16	Large2	9.34376	4.46479	1.55324	-2.87451	0.0040466	0.175564	#NAME?	#NAME?	#NAME?	0.755448	-3.03692	1.37462
ENSMUSG00000033938.5	Ndufb7	1371.32	0.600884	0.20989	-2.86285	0.00419844	0.175733	1.55814	1.87797	1.54769	1.93665	1.94741	2.56635
ENSMUSG00000018501.17	Ncor1	3264.17	-0.60389	0.211141	2.86012	0.00423481	0.175774	-0.964674	-1.2386	-1.45796	-1.82804	-1.82234	-2.03659
ENSMUSG00000036256.13	Igfbp7	1272.47	0.985412	0.344427	-2.86102	0.00422279	0.175774	2.12771	2.0782	2.84098	3.95448	2.85322	2.96418
ENSMUSG00000061983.7	Rps12	656.815	0.741893	0.259324	-2.86087	0.00422478	0.175774	-1.30687	-2.00953	-1.63214	-0.875693	-1.28127	-0.736548
ENSMUSG00000019775.17	Rgs17	694.577	-0.596966	0.209339	2.85167	0.00434904	0.178936	-0.713895	-0.808119	-0.984755	-2.00067	-1.28381	-1.36977
ENSMUSG00000051344.13	Plekhm3	557.149	-0.664865	0.233281	2.85007	0.00437102	0.178936	-0.248297	-0.702481	-0.399601	-1.30118	-0.961825	-1.36792
ENSMUSG00000035896.5	Rnase1	10.1529	-4.5307	1.58862	2.85196	0.00434501	0.178936	4.61148	5.36897	6.112	2.15063	0.184433	0.777594
ENSMUSG00000019737.14	Syne4	105.701	-1.06573	0.373699	2.85184	0.0043467	0.178936	-0.38918	0.243616	-0.846349	-1.35512	-2.36234	-0.850638
ENSMUSG00000026771.14	Spopl	226.04	-0.879891	0.309062	2.84698	0.00441367	0.179107	-1.28439	-1.42967	-1.70855	-2.18816	-2.56486	-2.51204
ENSMUSG00000015804.14	Med28	641.245	0.895046	0.314317	-2.84759	0.00440521	0.179107	-0.44776	-0.470929	0.231769	0.559399	0.177893	1.04257
ENSMUSG00000009013.5	Dynll1	1602.4	0.665974	0.23398	-2.84628	0.00442329	0.179107	0.862073	0.594317	0.140887	1.52619	0.70564	1.07949
ENSMUSG00000050295.4	Foxc1	134.43	0.986528	0.346348	-2.84837	0.00439435	0.179107	0.478018	-0.060701	0.905584	1.62014	1.12188	1.55875
ENSMUSG00000031812.16	Map1lc3b	1557.22	0.947446	0.33305	-2.84476	0.00444451	0.179479	-2.77319	-3.08486	-1.8612	-1.55239	-1.90128	-1.47852
ENSMUSG00000047412.16	Zbtb44	445.541	-0.651968	0.229484	2.84101	0.00449705	0.180622	-0.485395	-0.206366	-0.872212	-1.38752	-1.06664	-1.28421
ENSMUSG00000040495.4	Chrm4	35.8207	-1.61827	0.569467	2.84172	0.00448703	0.180622	3.59239	2.86817	4.24148	2.17616	2.248	1.43812
ENSMUSG00000036751.7	Cox6b1	3908.12	0.686991	0.241899	-2.83998	0.00451157	0.180718	2.05362	1.4662	1.81788	2.54883	2.32893	2.29622
ENSMUSG00000040613.14	Apobec1	26.1329	-2.16631	0.76511	2.83137	0.00463492	0.185161	0.296	-0.020445	-0.774194	-2.54349	-2.08446	-3.25475
ENSMUSG00000044080.9	S100a1	517.074	0.634517	0.224444	-2.82707	0.00469765	0.185303	1.00037	1.09637	0.823614	1.40992	1.19711	1.90646
ENSMUSG00000079317.10	Trappc2	427.966	0.744585	0.263388	-2.82695	0.00469941	0.185303	-0.973457	-1.5058	-0.511691	-0.224711	-0.243149	-0.36257
ENSMUSG00000024242.15	Map4k3	1008.59	-0.521887	0.184641	2.82649	0.00470616	0.185303	-0.342628	-0.375409	-0.964673	-1.37356	-0.965116	-1.20825
ENSMUSG00000005802.12	Slc30a4	1026.31	-0.604029	0.214585	2.81487	0.00487972	0.186922	-1.32904	-1.58955	-1.98097	-2.35949	-2.35554	-2.25177
ENSMUSG00000021943.7	Gdf10	6334.37	0.818557	0.290497	-2.81778	0.00483569	0.186922	1.01305	0.421736	1.22785	1.26657	1.80696	1.80448
ENSMUSG00000048038.8	Ccdc187	68.3598	-1.68861	0.59951	2.81665	0.00485274	0.186922	-0.964976	-0.939232	-2.60303	-3.14889	-3.60132	-2.6934
ENSMUSG00000050856.16	Atp5k	1492.99	0.670066	0.237598	-2.82017	0.00479983	0.186922	2.09877	2.75139	1.9827	3.00653	2.39722	3.19329
ENSMUSG00000025591.6	Tma16	157.971	-1.0875	0.386186	2.816	0.00486264	0.186922	-0.314266	-1.04341	-1.10671	-1.93898	-1.41959	-2.97391
ENSMUSG00000019362.8	D8Ertd738e	595.841	0.488718	0.173366	-2.819	0.00481733	0.186922	1.02009	0.495555	0.639775	1.21159	1.05617	1.09372
ENSMUSG00000039194.16	Rlbp1	123.904	1.13792	0.404019	-2.81651	0.00485484	0.186922	-1.24493	-0.769081	-0.749435	0.496603	-0.193972	0.198276
ENSMUSG00000037461.10	Ints7	704.692	0.602387	0.213521	-2.8212	0.00478438	0.186922	-0.165596	-0.0246984	0.108111	0.468521	0.553608	0.442639
ENSMUSG00000034652.12	Cd300a	67.1167	3.4793	1.23458	-2.81821	0.00482922	0.186922	-4.56476	#NAME?	#NAME?	-2.17083	-2.88067	-2.58432
ENSMUSG00000022195.7	6030458C11Rik	550.853	-0.614308	0.218433	2.81234	0.00491821	0.187433	-0.190411	0.33658	-0.0272839	-0.478857	-0.481768	-1.01226
ENSMUSG00000073650.8	Catip	26.89	-1.83381	0.651881	2.8131	0.00490659	0.187433	-0.152719	1.4317	-0.36281	-1.12014	-1.84281	-1.50289
ENSMUSG00000002413.15	Braf	1885.2	-0.449171	0.160605	2.79674	0.00516203	0.188231	-1.41558	-1.35031	-1.6071	-1.91138	-1.84455	-2.24311
ENSMUSG00000068566.12	Myadm	1103.16	0.491108	0.174837	-2.80894	0.00497044	0.188231	1.18937	1.29836	1.27869	1.67817	1.46526	1.83751
ENSMUSG00000015943.11	Bola1	177.27	0.78836	0.28067	-2.80885	0.00497194	0.188231	1.79636	1.90373	1.11367	2.28703	2.00143	2.61221
ENSMUSG00000040824.3	Snrpd2	374.291	0.896823	0.320789	-2.79567	0.00517917	0.188231	0.144561	-0.656227	0.278266	0.720818	0.503225	1.14297
ENSMUSG00000055239.10	Kcmf1	797.374	-0.429805	0.153433	2.80126	0.00509034	0.188231	0.103152	0.282618	-0.106871	-0.450978	-0.576447	-0.25432
ENSMUSG00000026864.13	Hspa5	9468.94	0.653026	0.233275	-2.79938	0.00512005	0.188231	1.25825	1.23231	0.538589	1.73355	1.23055	1.65476
ENSMUSG00000038872.10	Zfhx3	159.58	-1.38891	0.495819	2.80124	0.00509059	0.188231	2.74978	2.07053	0.733013	-0.738716	0.420111	1.20727
ENSMUSG00000051675.13	Trim32	2163.79	-0.454782	0.162303	2.80205	0.00507797	0.188231	0.474868	0.808955	0.853421	0.00921824	0.348617	0.129913
ENSMUSG00000006463.13	Zdhhc24	269.159	0.976232	0.348461	-2.80155	0.00508576	0.188231	-0.682817	-0.86964	-0.719418	-0.322316	-0.172274	0.750573
ENSMUSG00000026917.15	Wdr5	473.969	-0.483726	0.172419	2.80553	0.00502346	0.188231	-0.530173	-0.273268	-0.281706	-0.881664	-0.883789	-1.06055
ENSMUSG00000044034.11	Npb	33.6242	2.05466	0.734093	-2.79891	0.0051275	0.188231	3.30996	1.61341	2.15586	4.8279	5.13516	3.14705
ENSMUSG00000079509.10	Zfx	566.98	-0.715192	0.254784	2.80705	0.00499971	0.188231	-1.1195	-0.727689	-1.65066	-1.93443	-1.92074	-1.9657
ENSMUSG00000004460.17	Dnajb11	1187.14	0.528173	0.188639	-2.79991	0.00511163	0.188231	0.582554	0.45745	0.291558	0.921109	0.616892	1.09109
ENSMUSG00000035934.16	Pknox2	261.107	0.781248	0.278648	-2.80371	0.00505179	0.188231	-1.09423	-0.939013	-0.993816	-0.603513	-0.599935	0.123427
ENSMUSG00000029390.13	Tmed2	546.758	0.850341	0.303833	-2.79871	0.00513066	0.188231	-2.52738	-2.62502	-3.80536	-1.69877	-2.35647	-2.49453
ENSMUSG00000036510.17	Cdh8	645.119	0.560233	0.199914	-2.80237	0.00507286	0.188231	-0.313364	-0.569585	-1.07808	-0.126849	-0.0780752	-0.307635
ENSMUSG00000001403.13	Ube2c	17.4287	3.13298	1.11854	-2.80097	0.00509492	0.188231	-0.497395	#NAME?	-0.285831	2.89446	2.39492	0.429175
ENSMUSG00000016344.14	Ppdpf	292.753	0.863037	0.308647	-2.79619	0.00517086	0.188231	-1.72858	-1.37286	-0.883666	-1.18565	-0.43245	-0.137342
ENSMUSG00000026109.14	Tmeff2	1210.96	0.527947	0.189005	-2.7933	0.00521738	0.189159	0.0463084	0.275907	-0.453265	0.536099	0.276771	0.373018
ENSMUSG00000027335.9	Adra1d	82.6855	1.34938	0.48341	-2.79138	0.00524839	0.189775	0.983008	0.856894	2.35034	2.25948	3.37077	2.35454
ENSMUSG00000057469.8	E2f6	400.238	0.629138	0.225612	-2.78858	0.00529396	0.189775	-1.99374	-1.65562	-2.2156	-1.37668	-1.50397	-1.34014
ENSMUSG00000049106.7	Dcaf5	1013.27	-0.448549	0.160838	2.78882	0.00529009	0.189775	-0.394654	-0.304653	-0.750718	-1.17245	-1.13725	-0.771038
ENSMUSG00000063810.7	Alms1	739.287	-0.68724	0.246313	2.79011	0.00526895	0.189775	-0.251799	-0.60039	-0.868224	-1.23523	-1.32213	-1.43698
ENSMUSG00000043687.15	1190005I06Rik	7.19569	4.78405	1.71574	-2.78833	0.00529807	0.189775	#NAME?	#NAME?	#NAME?	-0.586799	0.159207	3.09952
ENSMUSG00000031431.13	Tsc22d3	1908.51	0.653779	0.234652	-2.78617	0.00533353	0.190587	-0.134773	-0.554309	0.247699	0.564842	0.186022	0.496498
ENSMUSG00000061175.11	Fnip2	549.147	-0.658503	0.236656	2.78253	0.00539366	0.191816	-0.728018	-0.736325	-0.950814	-1.86004	-1.58896	-1.27175
ENSMUSG00000022041.10	Chrna2	6.88017	-5.06453	1.81968	2.78319	0.00538265	0.191816	0.383451	3.54064	2.01066	#NAME?	#NAME?	#NAME?
ENSMUSG00000030231.11	Plekha5	710.11	-0.593818	0.213525	2.78103	0.00541866	0.192246	-1.23905	-1.10363	-1.69409	-2.34622	-2.03647	-1.77504
ENSMUSG00000047746.14	Fbxo40	12.7775	-2.84349	1.02394	2.77702	0.00548604	0.194174	0.859387	3.60514	1.83603	-0.548259	0.795224	#NAME?
ENSMUSG00000041737.8	Tmem45b	2.23044	-7.40446	2.66859	2.77467	0.0055257	0.194676	#NAME?	5.71569	6.112	#NAME?	#NAME?	2.32713
ENSMUSG00000021451.16	Sema4d	1626.21	0.362554	0.130667	-2.77464	0.00552634	0.194676	-0.0649497	0.0334789	-0.107206	0.115455	0.233128	0.310008
ENSMUSG00000020892.10	Aloxe3	138.12	-0.95257	0.343607	2.77226	0.00556683	0.19564	-0.262351	-0.0128274	-0.291244	-1.44901	-1.55866	-0.689337
ENSMUSG00000022340.15	Sybu	2252.27	-0.44188	0.159517	2.77012	0.00560364	0.19647	0.53223	0.579872	0.590883	0.0451856	0.231939	-0.202858
ENSMUSG00000034473.14	Sec22a	274.122	-0.782897	0.282791	2.76846	0.00563211	0.196905	0.238331	1.08141	0.0765153	-0.447615	-0.240187	-0.47877
ENSMUSG00000020423.6	Btg2	199.86	1.11463	0.402703	-2.76787	0.00564246	0.196905	-2.67621	-1.95394	-1.06921	-0.875204	-0.192357	-1.34651
ENSMUSG00000034164.17	Emid1	325.522	1.06171	0.383732	-2.76681	0.0056607	0.19708	-0.6686	0.317914	0.0294634	1.06012	0.461775	1.04089
ENSMUSG00000031758.10	Cdyl2	147.458	-0.911972	0.329845	2.76485	0.00569485	0.197806	0.727426	1.28204	0.695152	-0.08883	0.168622	-0.331162
ENSMUSG00000042115.4	Klhdc8a	231.089	1.01077	0.365747	-2.76359	0.00571702	0.198115	-0.936403	-2.28166	-1.58752	-1.15654	-0.319854	-0.452386
ENSMUSG00000035215.9	Lsm7	154.737	1.0632	0.384879	-2.76242	0.00573742	0.19836	-0.329249	-1.38993	-1.21215	0.301495	0.128174	-0.268841
ENSMUSG00000052512.17	Nav2	1027.23	-0.712078	0.258003	2.75996	0.00578076	0.198936	0.0043404	-0.0373162	-0.637734	-1.11217	-1.02926	-0.893126
ENSMUSG00000021313.16	Ryr2	2241.92	-0.891792	0.323113	2.76	0.00578012	0.198936	0.199692	-0.643398	-0.835694	-1.38156	-1.10337	-1.59302
ENSMUSG00000085601.7	Gm4969	8.36416	-2.96237	1.07409	2.75803	0.0058151	0.199656	1.98779	2.80367	-0.311269	-0.77622	-0.766753	#NAME?
ENSMUSG00000031497.9	Tnfsf13b	18.3306	-2.26856	0.823011	2.75641	0.00584391	0.199725	-1.33346	1.0748	0.173341	#NAME?	-1.69452	-1.91793
ENSMUSG00000027962.14	Vcam1	617.315	0.599132	0.217313	-2.757	0.0058334	0.199725	0.838068	1.07719	1.10148	1.83977	1.36031	1.27055
ENSMUSG00000062234.14	Gak	1549.96	-0.394098	0.143031	2.75533	0.00586332	0.19993	0.284658	0.0769613	-0.0214555	-0.486485	-0.373805	-0.258709
ENSMUSG00000029661.16	Col1a2	3959.12	1.1298	0.410906	-2.74953	0.00596799	0.200762	1.05126	1.94724	2.66601	2.92761	2.4145	3.53886
ENSMUSG00000028434.12	Epb41l4b	1033.74	-0.570608	0.207435	2.75077	0.00594547	0.200762	-1.91693	-1.29364	-1.65789	-2.30858	-2.17503	-2.3238
ENSMUSG00000046330.10	Rpl37a	729.891	0.647799	0.235474	-2.75104	0.00594067	0.200762	-0.178604	-0.246882	0.144703	0.662503	0.147122	0.57166
ENSMUSG00000038331.15	Satb2	10.5933	3.93229	1.42952	-2.75077	0.00594559	0.200762	-1.81069	#NAME?	#NAME?	1.02697	0.634447	1.64495
ENSMUSG00000027248.13	Pdia3	5525.84	0.605173	0.219929	-2.75167	0.00592916	0.200762	1.38453	1.36764	0.638879	1.93675	1.34709	1.58575
ENSMUSG00000035355.15	Kcnh4	13.4466	-2.74721	0.999165	2.7495	0.00596855	0.200762	3.78215	1.77327	2.97742	-2.81385	0.735858	0.039409
ENSMUSG00000054459.8	Vsnl1	8150.35	0.446828	0.16276	-2.74532	0.00604526	0.201974	1.00255	1.28267	0.873333	1.28333	1.43304	1.51225
ENSMUSG00000034724.18	Cnot6l	813.04	-0.543617	0.198001	2.74552	0.00604148	0.201974	-1.67359	-1.69099	-2.10133	-2.32586	-2.50059	-2.50827
ENSMUSG00000027602.9	Map1lc3a	2198.57	0.471112	0.171559	-2.74606	0.00603165	0.201974	1.95247	1.84866	1.90179	2.05863	2.09081	2.6854
ENSMUSG00000027374.12	Mrps5	631.962	-0.466445	0.170139	2.74155	0.00611493	0.202937	-0.85701	-0.386078	-0.674731	-1.20425	-1.15339	-1.21227
ENSMUSG00000028398.8	Dmac1	365.236	0.732522	0.267172	-2.74176	0.00611103	0.202937	0.388873	0.810068	1.12332	1.36517	1.14586	1.76427
ENSMUSG00000034424.5	Gcsh	450.324	0.591833	0.215768	-2.74292	0.00608953	0.202937	-0.567541	-0.35715	-0.715163	-0.361948	-0.0962667	0.265282
ENSMUSG00000046605.14	B3gntl1	84.8045	-1.1814	0.431337	2.73893	0.00616399	0.203363	-0.124479	0.424006	-1.03886	-1.1622	-1.12361	-2.74547
ENSMUSG00000049580.12	Tsku	57.6672	1.28763	0.470148	-2.73877	0.00616686	0.203363	0.180258	1.40097	0.107348	1.22989	2.11763	2.19395
ENSMUSG00000007721.6	Ccdc124	540.343	0.785676	0.286882	-2.73868	0.00616873	0.203363	0.214694	0.0368917	0.661157	1.40362	0.879976	0.74611
ENSMUSG00000019188.16	H13	1386.13	0.457992	0.167416	-2.73565	0.00622575	0.203443	0.522461	0.642833	0.838963	0.984361	0.807297	1.31229
ENSMUSG00000062906.12	Hdac10	126.53	-0.881551	0.322212	2.73594	0.0062203	0.203443	-0.191459	-0.687369	-0.177159	-1.74975	-1.17428	-0.967616
ENSMUSG00000029452.18	Tmem116	42.0083	1.72718	0.631267	-2.73605	0.0062182	0.203443	-1.03528	#NAME?	-1.66178	0.169703	-1.24971	0.131967
ENSMUSG00000052276.8	Ostn	21.0437	4.35112	1.59025	-2.73612	0.00621676	0.203443	#NAME?	#NAME?	#NAME?	2.45324	1.99228	2.08543
ENSMUSG00000037370.13	Enpp1	273.068	0.793685	0.290217	-2.7348	0.00624187	0.203493	-0.585773	0.191481	-0.113182	0.9454	0.531644	0.206969
ENSMUSG00000020447.5	Npc1l1	28.0451	-3.10298	1.13692	2.72928	0.00634725	0.203493	-0.42941	#NAME?	#NAME?	#NAME?	-5.37731	-3.84887
ENSMUSG00000042436.12	Mfap4	45.3027	1.71943	0.629227	-2.73261	0.00628354	0.203493	0.0250537	1.01836	1.50519	3.43042	1.91215	2.01567
ENSMUSG00000023805.17	Synj2	664.244	-0.586843	0.214973	2.72984	0.00633644	0.203493	0.0457786	-0.0547473	0.250057	-1.07523	-0.267023	-0.533338
ENSMUSG00000053950.10	Adnp2	434.162	-0.641355	0.234746	2.73212	0.00629283	0.203493	-0.00384422	-0.0149966	0.264987	-0.689083	-0.704759	-0.577474
ENSMUSG00000076437.10	Selenoh	234.817	0.616711	0.225713	-2.73228	0.00628976	0.203493	0.0736606	0.435822	0.772789	0.930722	0.993843	0.942391
ENSMUSG00000026663.6	Atf6	1152.89	-0.620893	0.227317	2.7314	0.00630653	0.203493	-0.478166	-0.426598	-0.575272	-0.840289	-1.20331	-1.55284
ENSMUSG00000001418.13	Glmp	924.747	0.489371	0.179314	-2.72913	0.00635021	0.203493	1.0809	1.42979	1.19248	1.75711	1.37007	1.73882
ENSMUSG00000022533.14	Atp13a3	1621.9	-0.515828	0.188974	2.72962	0.00634081	0.203493	-0.565978	-0.520683	-0.664233	-1.07914	-1.20542	-1.2781
ENSMUSG00000109293.1	Dcst2	8.56636	-4.24026	1.55465	2.72748	0.00638207	0.203638	0.587457	1.77327	2.30023	#NAME?	-1.65822	#NAME?
ENSMUSG00000020163.12	Uqcr11	1127.2	0.734912	0.270191	-2.71997	0.00652871	0.204634	0.833211	1.35886	1.10198	1.2404	1.63927	2.22263
ENSMUSG00000021870.17	Slmap	984.045	-0.574162	0.210764	2.7242	0.00644581	0.204634	-1.18151	-1.19794	-1.88259	-2.09221	-1.92741	-2.19337
ENSMUSG00000016262.14	Sertad4	177.856	-0.857012	0.315123	2.71961	0.0065359	0.204634	-0.296007	0.333021	-0.908676	-1.1022	-0.936271	-1.56679
ENSMUSG00000028843.8	Sh3bgrl3	619.163	0.559856	0.205795	-2.72045	0.00651924	0.204634	1.72841	1.92445	1.8105	1.89196	2.34911	2.63819
ENSMUSG00000033578.7	Tmem35a	1182.6	0.592083	0.217612	-2.72082	0.00651204	0.204634	0.472066	0.524503	1.06408	1.05078	1.10531	1.42772
ENSMUSG00000035310.15	Lin54	252.951	-0.764133	0.280528	2.72391	0.00645148	0.204634	0.0703606	-0.421556	0.525054	-0.559769	-0.60497	-1.06718
ENSMUSG00000001119.7	Col6a1	531.772	0.847327	0.31157	-2.71954	0.00653735	0.204634	0.384555	1.0839	-0.112779	1.23795	0.818635	1.65039
ENSMUSG00000027803.14	Wwtr1	522.625	0.735054	0.270353	-2.71887	0.00655061	0.204634	-0.561459	-0.974652	-0.111348	0.394764	-0.0256079	0.0878186
ENSMUSG00000038011.15	Dnah10	52.427	-1.66166	0.610609	2.72131	0.00650237	0.204634	0.151303	-1.67022	-1.07682	-3.84045	-1.82987	-2.47982
ENSMUSG00000057133.14	Chd6	1393.67	-0.580662	0.213398	2.72102	0.00650802	0.204634	-0.855514	-1.09332	-1.18426	-1.61583	-1.45708	-2.14343
ENSMUSG00000054091.9	1810037I17Rik	414.691	1.06546	0.392234	-2.71638	0.00659998	0.20571	-1.16239	-0.891742	-0.157429	0.204486	-0.227203	0.836207
ENSMUSG00000006599.13	Gtf2h1	605.596	-0.623363	0.229537	2.71575	0.00661265	0.20571	-0.848545	-0.967246	-1.39873	-1.76879	-1.45226	-2.22706
ENSMUSG00000000889.8	Dbh	37.057	-6.25285	2.30416	2.71373	0.00665313	0.206538	2.58114	5.19453	9.69696	5.05982	-4.15215	2.74366
ENSMUSG00000054162.15	Spock3	2618.88	0.500938	0.184813	-2.71051	0.00671794	0.206848	0.8685	0.767496	0.62129	1.11292	1.34383	0.975156
ENSMUSG00000026688.5	Mgst3	2350.66	0.505399	0.186355	-2.71202	0.00668747	0.206848	2.38921	2.70816	2.54942	2.78199	2.99572	3.13135
ENSMUSG00000022504.10	Ciita	22.0176	3.848	1.41968	-2.71048	0.00671862	0.206848	#NAME?	#NAME?	#NAME?	-1.86235	-1.84948	-4.07334
ENSMUSG00000030655.15	Smg1	4427.41	-1.18679	0.437673	2.71159	0.00669619	0.206848	-1.10618	-1.59213	-2.63786	-3.19922	-3.07394	-2.56881
ENSMUSG00000020752.11	Recql5	234.615	-0.630191	0.23261	2.70921	0.00674427	0.207209	-0.668374	-0.346298	-0.932172	-1.2749	-1.2406	-1.65931
ENSMUSG00000030098.15	Grip2	200.423	-0.91426	0.338355	2.70207	0.00689092	0.207366	0.511458	0.195288	0.0511083	-1.47674	-0.632743	-0.265115
ENSMUSG00000029202.12	Pds5a	1327.96	-0.538477	0.199082	2.7048	0.00683447	0.207366	-0.615294	-0.494493	-1.03457	-1.29187	-1.08921	-1.66272
ENSMUSG00000078440.10	Dohh	63.8967	1.29087	0.477033	-2.70604	0.00680918	0.207366	-2.46821	-3.10413	-0.936176	-0.724957	-0.713864	-0.376749
ENSMUSG00000028645.11	Slc2a1	3524.7	0.778877	0.288203	-2.70252	0.0068815	0.207366	1.90415	1.48078	2.43489	2.98646	2.29037	2.61273
ENSMUSG00000040302.17	Rbm48	131.994	-0.78771	0.291254	2.70454	0.00683982	0.207366	0.589894	0.019436	-0.200238	-0.840571	-0.519121	-0.818781
ENSMUSG00000055128.15	Cgrrf1	539.194	0.48885	0.180686	-2.70551	0.00681986	0.207366	0.641477	0.270996	0.403653	0.980165	0.61152	0.920394
ENSMUSG00000030243.16	Recql	283.921	-0.550752	0.203844	2.70183	0.00689582	0.207366	-0.0671876	0.199438	-0.0467856	-0.674334	-0.473478	-0.733959
ENSMUSG00000048537.16	Phldb1	1698.19	-0.453604	0.167628	2.70601	0.00680964	0.207366	-0.668268	-0.40958	-0.426132	-1.11721	-1.21801	-0.801617
ENSMUSG00000035258.15	Abi3bp	479.11	0.705048	0.26078	-2.70362	0.00685894	0.207366	0.453193	0.167542	0.63512	1.45033	1.06579	0.516695
ENSMUSG00000055368.14	Slc6a2	31.2755	-6.15272	2.27751	2.70151	0.00690245	0.207366	-1.14925	3.42044	6.75966	3.32285	-5.63592	0.92514
ENSMUSG00000116461.1	Gm44502	2.55074	-6.717	2.48723	2.7006	0.00692147	0.207519	6.19644	3.5171	#NAME?	#NAME?	#NAME?	#NAME?
ENSMUSG00000056328.14	Myh1	21.6403	3.87184	1.4344	-2.69926	0.00694928	0.207934	#NAME?	1.0409	5.52704	5.29894	6.12425	7.61253
ENSMUSG00000038170.15	Pde4dip	3302.77	-0.451234	0.167217	2.6985	0.00696537	0.207998	-0.37258	-0.583545	-0.242063	-0.852783	-0.884687	-1.08773
ENSMUSG00000073664.11	Nbeal1	758.076	-0.52045	0.192985	2.69684	0.00700008	0.208616	-0.818096	-1.2636	-1.33419	-1.75202	-1.76695	-1.71157
ENSMUSG00000027366.12	Sppl2a	883.338	0.478594	0.177683	-2.69352	0.00707019	0.209866	-0.170112	0.0093557	-0.46949	0.409106	-0.0713244	0.19722
ENSMUSG00000048126.16	Col6a3	124.353	1.1818	0.438715	-2.69377	0.00706483	0.209866	0.809079	1.1336	1.54443	2.36838	2.02719	2.29285
ENSMUSG00000022972.10	Cfap298	175.234	1.12535	0.417988	-2.69231	0.00709596	0.210063	0.839678	0.0499607	1.542	2.13244	1.62637	2.17922
ENSMUSG00000033066.15	Gas7	4969.13	0.6038	0.224543	-2.68901	0.00716633	0.211456	-1.94136	-2.33461	-2.25131	-1.78209	-1.49661	-1.69822
ENSMUSG00000049932.3	H2afx	316.544	0.985147	0.366716	-2.6864	0.00722265	0.212278	1.32818	0.502946	1.77719	2.19171	2.12242	2.22452
ENSMUSG00000040297.12	Suco	841.94	-0.454462	0.169325	2.68396	0.00727555	0.213411	-0.289471	-0.243881	-0.836606	-1.05236	-0.898735	-1.03373
ENSMUSG00000026478.14	Lamc1	1435.57	0.527506	0.196712	-2.68162	0.00732664	0.213431	0.664189	0.732474	0.786134	1.39769	1.27784	0.793406
ENSMUSG00000062488.9	Ifit3b	67.0102	-1.62019	0.604117	2.68191	0.00732034	0.213431	-0.35522	-0.00323111	-2.15451	-1.30993	-2.88067	-2.56382
ENSMUSG00000026544.6	Dusp23	61.6751	1.60567	0.598837	-2.68131	0.0073335	0.213431	-1.32642	#NAME?	-0.000815256	0.468015	0.712165	0.277305
ENSMUSG00000024163.17	Mapk8ip3	5207.65	-0.473287	0.176425	2.68265	0.00730411	0.213431	0.191269	0.185117	0.135088	-0.736278	-0.362523	-0.139353
ENSMUSG00000022812.14	Gsk3b	2922.68	-0.595546	0.222185	2.6804	0.00735337	0.213592	0.0247237	0.0624733	-0.437757	-0.841522	-0.526298	-0.999132
ENSMUSG00000030189.15	Ybx3	898.175	0.551579	0.205832	-2.67975	0.00736772	0.213592	0.128623	0.446943	0.666314	1.02194	0.631805	0.998607
ENSMUSG00000040048.14	Ndufb10	2402.42	0.325229	0.12144	-2.67811	0.00740388	0.214224	1.59627	1.81186	1.60224	1.95302	1.72664	2.02998
ENSMUSG00000020641.16	Rsad2	82.5395	-1.40869	0.526161	2.6773	0.00742192	0.21433	1.24003	1.67171	0.671036	0.632377	-0.740219	-0.36716
ENSMUSG00000048924.14	Ccdc125	25.5879	3.46198	1.29367	-2.67609	0.00744863	0.214685	#NAME?	#NAME?	#NAME?	-2.46322	-1.71329	-3.36743
ENSMUSG00000034566.10	Atp5h	2224.05	0.500698	0.187147	-2.67543	0.00746343	0.214696	-0.233803	-0.144648	-0.109761	0.376465	0.263541	0.0650897
ENSMUSG00000063626.6	Unc5d	358.2	-0.827992	0.309694	2.67358	0.00750457	0.2147	1.13637	0.341715	0.538177	-0.892105	0.120347	-0.01495
ENSMUSG00000046814.3	Gchfr	61.9612	1.4717	0.550461	-2.67358	0.00750461	0.2147	0.406263	1.80472	1.50321	2.02753	2.82532	3.59192
ENSMUSG00000042305.12	Tmem183a	698.157	-0.61736	0.23092	2.67348	0.00750679	0.2147	-2.06288	-2.42041	-2.72444	-3.18204	-3.14962	-2.98983
ENSMUSG00000027613.15	Eif6	799.356	-0.414477	0.155234	2.67002	0.00758467	0.216098	1.09748	1.31722	1.29895	0.570705	0.711578	0.893297
ENSMUSG00000058006.12	Mdn1	1030.15	-0.941038	0.352715	2.66799	0.00763074	0.216582	-0.251862	-1.01222	-0.961996	-1.63527	-2.15693	-1.44758
ENSMUSG00000022897.15	Dyrk1a	1169.37	-0.454192	0.1702	2.66858	0.00761733	0.216582	-0.283696	-0.648987	-0.657766	-1.28927	-0.931356	-1.0368
ENSMUSG00000041679.9	Lrrc29	20.5717	-2.42756	0.910785	2.66535	0.00769085	0.21746	-0.638146	1.89776	0.890525	-2.42735	-1.57016	-0.995013
ENSMUSG00000064145.12	Arih2	528.267	-0.676765	0.253909	2.66539	0.00769002	0.21746	-1.85583	-1.41242	-1.76127	-2.81206	-2.1532	-2.44779
ENSMUSG00000046572.10	Zfp518b	286.899	-0.690564	0.259232	2.66388	0.00772447	0.217997	-0.437516	-0.588076	-0.503226	-1.42893	-1.14795	-1.33599
ENSMUSG00000041895.15	Wipi1	447.732	0.603583	0.226648	-2.66309	0.00774273	0.218099	-0.183823	-0.49053	0.0163935	-0.0781556	0.513394	0.391203
ENSMUSG00000025782.12	Taf3	325.852	-0.620154	0.233118	2.66026	0.00780807	0.219111	-0.399883	-0.182662	0.0504977	-0.681511	-1.09883	-0.877943
ENSMUSG00000020661.15	Dnmt3a	2437.42	-0.43163	0.16235	2.65864	0.00784578	0.219756	-1.5295	-1.68941	-1.66477	-1.94217	-2.14713	-2.36282
ENSMUSG00000015766.14	Eps8	3095.3	-0.503838	0.189727	2.65559	0.00791703	0.220621	-0.214702	0.0968857	-0.374236	-0.515244	-0.713164	-1.03521
ENSMUSG00000038295.14	Atg9b	28.6697	-2.13843	0.805136	2.65599	0.00790771	0.220621	3.58114	3.34064	1.62925	-1.14319	0.255509	1.94062
ENSMUSG00000038539.15	Atf5	527.588	0.999947	0.376725	-2.65432	0.00794694	0.220621	-1.55833	-0.864852	-0.826541	-0.432057	-0.424017	0.299297
ENSMUSG00000039105.6	Atp6v1g1	663.008	0.699867	0.263808	-2.65294	0.00797947	0.220621	-2.39945	-2.2689	-1.60203	-1.55733	-1.55348	-1.17963
ENSMUSG00000032410.13	Xrn1	768.734	-0.737752	0.27805	2.65331	0.00797063	0.220621	-0.933082	-0.781047	-1.23929	-1.71045	-1.47158	-2.35118
ENSMUSG00000046862.14	Pramef8	356.171	-0.552306	0.208315	2.6513	0.00801827	0.220621	0.164289	-0.00822301	0.231644	-0.348543	-0.710676	-0.469906
ENSMUSG00000021111.15	Papola	1640.26	-0.561666	0.211648	2.65377	0.0079597	0.220621	-0.971444	-1.0588	-1.80629	-1.87301	-2.06091	-1.78929
ENSMUSG00000020219.7	Timm13	848.046	0.457052	0.172406	-2.65103	0.00802473	0.220621	1.22669	1.51115	1.75052	1.87498	1.84879	1.88574
ENSMUSG00000071984.10	Fndc1	38.1744	1.69015	0.638178	-2.6484	0.00808743	0.221527	0.406263	0.109098	-0.899219	1.55396	1.16346	1.30851
ENSMUSG00000000202.9	Btbd17	996.512	1.03399	0.390355	-2.64884	0.00807685	0.221527	1.4813	2.13996	2.55578	2.8815	2.61701	3.59169
ENSMUSG00000031538.6	Plat	1584.94	0.489396	0.184884	-2.64704	0.00811987	0.221601	1.39041	0.995535	1.49806	1.62707	1.54079	1.93173
ENSMUSG00000032051.9	Fdx1	281.668	0.714906	0.270067	-2.64715	0.00811743	0.221601	1.79624	1.32322	1.32126	2.11347	2.20499	1.9606
ENSMUSG00000041846.15	Ppp4r3a	956.133	-0.616938	0.233274	2.6447	0.00817638	0.222735	-0.493177	-0.887466	-1.13899	-1.17918	-1.55735	-1.97131
ENSMUSG00000055633.6	Zfp580	199.009	1.00623	0.380604	-2.64378	0.00819865	0.222934	0.665452	1.07148	1.66619	1.42475	2.16157	2.63029
ENSMUSG00000028419.5	Chmp5	1303.33	0.534715	0.202537	-2.64008	0.00828859	0.224208	0.244255	0.339838	0.420393	1.02639	0.718851	0.55058
ENSMUSG00000017057.9	Il13ra1	136.23	1.1412	0.432775	-2.63694	0.00836587	0.224208	-0.673603	-1.36828	-1.20699	0.572919	-0.672784	-0.233608
ENSMUSG00000034709.8	Ppp1r21	1099.56	-0.380038	0.144057	2.63811	0.00833683	0.224208	0.0952504	0.0187088	-0.00521649	-0.548799	-0.274024	-0.511093
ENSMUSG00000028736.13	Pax7	14.0721	-4.55745	1.72601	2.64045	0.00827958	0.224208	4.62826	5.87539	3.30023	-3.37816	2.02489	6.68521
ENSMUSG00000041598.7	Cdc42ep4	1547.29	0.615713	0.23329	-2.63926	0.00830873	0.224208	-0.710558	-0.320428	-0.170903	0.27937	0.169181	-0.00388847
ENSMUSG00000029703.10	Lrwd1	226.831	-0.702901	0.266319	2.63932	0.00830736	0.224208	0.703655	1.26017	0.362948	-0.223229	0.15511	0.0493742
ENSMUSG00000033904.16	Ccp110	1336.89	-0.521705	0.197803	2.6375	0.00835191	0.224208	-1.17211	-1.04608	-1.8857	-2.13261	-1.88394	-1.88654
ENSMUSG00000032480.17	Dhx30	1358.54	-0.481423	0.182506	2.63785	0.00834343	0.224208	0.146213	-0.247976	0.188932	-0.566965	-0.32552	-0.750831
ENSMUSG00000018500.2	Adora2b	46.7267	1.39852	0.53064	-2.63554	0.00840042	0.22473	0.220537	0.958245	-0.321048	1.61254	0.853562	2.44259
ENSMUSG00000075702.9	Selenom	3442.85	0.616183	0.233962	-2.63369	0.00844624	0.225551	0.635971	1.08706	1.02099	1.42493	1.31128	1.62807
ENSMUSG00000028822.11	Tmem50a	1025.53	0.524207	0.199199	-2.63158	0.00849898	0.225746	1.19448	1.16426	1.33209	1.75154	1.72644	1.50226
ENSMUSG00000031844.8	Hsd17b2	4.36457	-5.23945	1.99047	2.63227	0.00848162	0.225746	4.61148	#NAME?	5.52704	0.150626	0.370446	1.05998
ENSMUSG00000020018.6	Snrpf	269.246	0.662422	0.251695	-2.63185	0.00849219	0.225746	2.01858	1.6785	1.66206	2.24904	2.47659	2.34771
ENSMUSG00000013698.12	Pea15a	5164.84	0.41577	0.158246	-2.62737	0.00860477	0.227744	-0.989789	-1.01006	-1.15957	-0.822057	-0.928834	-0.467573
ENSMUSG00000030869.11	Ndufab1	779.045	0.56193	0.213875	-2.62737	0.00860475	0.227744	0.356364	-0.11477	-0.0275418	0.448196	0.360998	0.831267
ENSMUSG00000004069.17	Dnaja3	1205.84	-0.323241	0.123183	2.62408	0.00868831	0.229273	0.621681	0.656966	0.577381	0.189214	0.268826	0.148024
ENSMUSG00000029190.19	D5Ertd579e	1997.98	-0.436231	0.166364	2.62214	0.00873784	0.229273	-1.75013	-2.16826	-2.32398	-2.56366	-2.53213	-2.69732
ENSMUSG00000028560.11	Usp1	576.407	-0.612603	0.233618	2.62224	0.00873541	0.229273	-1.59603	-1.47438	-2.52009	-2.48969	-2.48399	-2.58874
ENSMUSG00000042390.9	Gatad2b	2065.15	-0.477624	0.182111	2.62271	0.00872345	0.229273	0.221499	0.179851	0.312417	-0.196047	-0.254719	-0.543583
ENSMUSG00000027999.15	Pla2g12a	199.082	0.697653	0.266069	-2.62208	0.00873947	0.229273	-0.159917	-0.658069	0.128907	0.288198	0.323767	0.694409
ENSMUSG00000066705.7	Fxyd6	855.142	0.658625	0.251251	-2.62139	0.0087573	0.229337	-0.400147	-0.769791	-0.386801	-0.37849	-0.0571721	0.574527
ENSMUSG00000041231.15	Ublcp1	634.446	0.656728	0.250699	-2.61959	0.00880364	0.230146	-1.9348	-2.12528	-1.80566	-1.13922	-1.24528	-1.81166
ENSMUSG00000073676.4	Hspe1	533.617	0.716652	0.273775	-2.61766	0.00885338	0.230664	0.087334	-0.425104	0.266853	1.05908	0.450095	0.287273
ENSMUSG00000001632.16	Brpf1	900.912	-0.468782	0.179087	2.61762	0.00885442	0.230664	-0.596517	-0.648629	-1.00101	-1.50906	-1.19486	-1.22034
ENSMUSG00000027495.4	Fam210b	264.091	0.644642	0.246409	-2.61614	0.00889299	0.231264	-0.536739	-0.605769	-0.229941	-0.379776	0.364799	0.242913
ENSMUSG00000036733.16	Rbm42	1001.98	1.97371	0.755429	-2.61269	0.00898314	0.233202	7.65981	9.71125	13.7144	11.2751	10.3139	11.2592
ENSMUSG00000055923.16	Aasdh	111.673	1.3397	0.514206	-2.60538	0.00917729	0.233762	-2.38619	#NAME?	-3.68742	-1.97862	-2.56185	-1.92071
ENSMUSG00000017548.15	Suz12	1024.4	-0.579925	0.222213	2.60977	0.00906027	0.233762	-0.726008	-0.825824	-1.4174	-1.4892	-1.45391	-2.01648
ENSMUSG00000020696.18	Rffl	208.061	0.796271	0.305543	-2.60608	0.0091584	0.233762	-1.75482	-1.00646	-1.42959	-0.620551	-0.728776	-0.765666
ENSMUSG00000053897.15	Slc39a8	158.012	1.18027	0.452861	-2.60624	0.00915412	0.233762	0.0825347	-0.618789	-0.174518	1.71721	0.658539	0.212108
ENSMUSG00000013646.17	Sh3bp5l	522.269	0.70694	0.271096	-2.60771	0.00911505	0.233762	-2.89997	-3.40053	-2.72988	-3.0196	-2.29023	-1.93375
ENSMUSG00000026743.16	Mllt10	445.408	-0.750686	0.287543	2.61069	0.00903587	0.233762	-1.34539	-1.07394	-2.39314	-2.49162	-2.4958	-2.13041
ENSMUSG00000033075.17	Senp1	321.903	-0.631424	0.241918	2.61007	0.00905236	0.233762	-1.58842	-1.43063	-2.19511	-2.61958	-2.31065	-2.43352
ENSMUSG00000041168.10	Lonp1	1283.82	-0.443129	0.169924	2.60781	0.00911238	0.233762	-0.276613	0.0486293	-0.042935	-0.49088	-0.735665	-0.630187
ENSMUSG00000002847.7	Pla1a	21.5563	1.97679	0.758004	-2.60789	0.0091102	0.233762	0.239839	-1.4857	-0.0956802	2.07166	1.13261	1.50749
ENSMUSG00000021978.9	Extl3	1109.11	0.586538	0.225082	-2.60589	0.0091636	0.233762	-1.63505	-1.84471	-1.53587	-1.32681	-1.32717	-0.935065
ENSMUSG00000032228.16	Tcf12	1431.01	-0.364347	0.139751	2.60712	0.00913075	0.233762	-0.672283	-0.544456	-0.908592	-1.14091	-1.09605	-1.25478
ENSMUSG00000032332.17	Col12a1	463.553	1.01446	0.389535	-2.60428	0.00920676	0.234113	-0.584851	0.404888	-0.557592	0.99058	0.190471	1.07535
ENSMUSG00000030647.8	Ndufc2	2680.7	0.658141	0.252926	-2.60211	0.00926531	0.234994	2.33299	1.96054	2.18533	2.87934	2.76167	2.52116
ENSMUSG00000025652.6	Tmem89	2.42274	-6.08393	2.33833	2.60182	0.00927295	0.234994	#NAME?	5.71569	3.8852	0.888358	#NAME?	#NAME?
ENSMUSG00000028608.15	Czib	411.697	0.668485	0.257008	-2.60103	0.00929445	0.235043	-0.165041	-0.772471	-0.355895	0.324093	-0.00488538	0.258361
ENSMUSG00000020308.6	Tpgs1	800.018	0.669413	0.257408	-2.60059	0.00930643	0.235043	2.07369	2.00258	2.30976	2.5051	2.64965	2.94394
ENSMUSG00000026042.16	Col5a2	277.762	0.706958	0.272048	-2.59865	0.00935905	0.235573	0.380624	0.222468	0.851127	1.17215	0.781301	1.41382
ENSMUSG00000087403.9	Kantr	277.197	-0.896461	0.345206	2.59689	0.00940725	0.235592	-1.55792	-2.36889	-2.83689	-3.40952	-3.16558	-3.09676
ENSMUSG00000020928.14	Higd1b	51.9656	1.38576	0.533556	-2.59722	0.00939809	0.235592	0.40358	1.87378	0.496621	2.17915	1.95599	2.20617
ENSMUSG00000031951.8	Tmem231	157.28	0.807807	0.311019	-2.59729	0.00939631	0.235592	-1.14989	-0.781298	-0.39326	-0.483809	-0.082136	0.438692
ENSMUSG00000037376.14	Trmt6	488.207	-0.634879	0.244652	2.59503	0.00945835	0.235839	-0.706128	0.03801	-0.882973	-1.13921	-1.24395	-1.24169
ENSMUSG00000024294.14	Mib1	1873.48	-0.510925	0.196947	2.59423	0.00948042	0.235839	-0.983716	-0.8713	-1.26563	-1.69673	-1.60234	-1.60419
ENSMUSG00000023110.12	Prmt5	901.874	-0.34661	0.133588	2.59463	0.00946939	0.235839	0.189687	0.235286	0.191949	-0.120823	-0.252002	-0.330955
ENSMUSG00000048482.14	Bdnf	494.723	-0.730211	0.281884	2.59047	0.00958454	0.238032	-0.0566665	0.13139	-0.0234362	-0.276689	-0.86272	-1.22909
ENSMUSG00000036972.14	Zic4	506.873	0.586001	0.226299	-2.5895	0.00961153	0.238305	-2.31679	-1.80168	-2.37032	-1.85086	-1.49157	-1.64661
ENSMUSG00000027665.13	Pik3ca	1661.31	-0.571058	0.220679	2.58773	0.00966106	0.238739	-0.512994	-0.458909	-0.876949	-1.34497	-1.10625	-1.34634
ENSMUSG00000030431.8	Tmem238	105.898	1.24339	0.480413	-2.58817	0.00964884	0.238739	1.5074	3.19901	2.15404	3.54512	3.414	3.47966
ENSMUSG00000032890.17	Rims3	2702.14	-0.944411	0.365616	2.58307	0.00979257	0.239752	-2.51923	-1.84492	-2.91143	-3.74805	-3.5164	-2.99117
ENSMUSG00000018481.9	Appbp2	2301.67	-0.424717	0.164458	2.58252	0.00980823	0.239752	-0.173204	0.00574019	-0.155267	-0.439693	-0.572056	-0.866661
ENSMUSG00000092083.4	Kcnb2	262.065	-1.08211	0.418884	2.58333	0.00978523	0.239752	-0.203862	-0.311168	-2.19463	-1.85208	-1.75143	-2.29048
ENSMUSG00000041747.3	Utp15	425.699	-0.493362	0.190905	2.58432	0.00975699	0.239752	-0.207336	0.153376	-0.073994	-0.649605	-0.471876	-0.779264
ENSMUSG00000019997.11	Ccn2	421.575	1.13196	0.437817	-2.58547	0.00972452	0.239752	1.71941	0.106163	1.41687	2.09798	1.94905	2.30912
ENSMUSG00000050234.7	Gja4	86.8431	1.17551	0.455221	-2.58229	0.0098147	0.239752	1.17846	0.414895	1.76964	2.28254	1.74815	2.85774
ENSMUSG00000071076.6	Jund	1326.93	0.853047	0.330207	-2.58337	0.00978397	0.239752	2.86925	3.11641	3.31656	3.73119	3.69996	4.10246
ENSMUSG00000085272.7	Sbk3	16.1985	-3.87322	1.50157	2.57945	0.00989583	0.240551	#NAME?	0.070884	#NAME?	-3.8802	#NAME?	#NAME?
ENSMUSG00000032966.14	Fkbp1a	3545.09	0.369694	0.14327	-2.5804	0.00986853	0.240551	0.15386	0.112884	0.321306	0.434911	0.604969	0.393852
ENSMUSG00000091705.8	H2-Q2	8.55436	-3.7467	1.45244	2.57959	0.00989166	0.240551	6.61148	1.0409	3.40681	#NAME?	0.357274	1.29905
ENSMUSG00000000409.14	Lck	8.34612	-3.26468	1.26622	2.57829	0.00992904	0.240965	6.19644	1.57045	1.11797	-0.28327	-1.28527	-1.54555
ENSMUSG00000033917.15	Gde1	3120.66	0.443892	0.17221	-2.57762	0.00994838	0.241042	1.08973	0.816285	0.790241	1.10056	1.05377	1.5754
ENSMUSG00000024085.13	Man2a1	384.255	0.52469	0.203692	-2.5759	0.00999798	0.24185	0.0621861	-0.177651	-0.594051	0.290216	0.00515549	0.329659
ENSMUSG00000036106.15	Prr5	166.865	1.08098	0.419811	-2.57492	0.0100263	0.242143	0.441435	0.791634	0.621916	0.911087	1.37656	2.15784
ENSMUSG00000039262.16	Prrc2b	3891.42	-0.610314	0.237199	2.573	0.0100821	0.242736	-1.10208	-1.28013	-1.43209	-1.95268	-1.80022	-2.13188
ENSMUSG00000054206.2	Gzmm	17.4878	-3.75466	1.45958	2.57243	0.0100988	0.242736	-2.33346	-0.707879	#NAME?	-3.60888	#NAME?	#NAME?
ENSMUSG00000029635.15	Cdk8	271.611	-0.799085	0.310639	2.5724	0.0100998	0.242736	-1.46959	-1.5631	-2.59769	-2.79634	-2.47849	-2.99423
ENSMUSG00000030683.11	Sez6l2	12010.7	0.371245	0.14444	-2.57024	0.0101629	0.24386	1.863	2.02207	2.15735	2.1589	2.29108	2.42337
ENSMUSG00000000555.8	Itga5	151.77	0.778397	0.302923	-2.56962	0.010181	0.243903	0.548019	0.489445	0.669455	1.43697	1.28197	1.03157
ENSMUSG00000022548.14	Apod	5780.73	0.737889	0.287338	-2.56802	0.010228	0.244636	1.2044	1.23058	1.64082	2.30782	1.68709	1.91694
ENSMUSG00000033364.13	Usp37	509.789	-0.763411	0.29752	2.56592	0.0102903	0.245337	-0.536303	-0.245034	-0.41513	-0.90164	-1.15028	-1.71572
ENSMUSG00000038628.8	Polr3k	860.251	0.486687	0.189792	-2.56432	0.010338	0.245725	-0.240363	-0.898537	-0.704949	-0.284958	-0.0380676	-0.315965
ENSMUSG00000071074.9	Yipf3	1410.92	0.489562	0.190958	-2.56371	0.010356	0.245725	1.34892	1.78988	1.68978	1.90824	1.97032	2.15506
ENSMUSG00000038451.13	Spsb2	80.1241	0.928713	0.362651	-2.5609	0.0104402	0.246936	-0.24902	0.490627	-0.100128	1.08402	0.485451	1.18526
ENSMUSG00000042380.8	Smim12	267.377	0.625983	0.244505	-2.5602	0.0104611	0.247038	0.0123579	-0.12649	0.0576922	0.166989	0.487229	0.876786
ENSMUSG00000021241.7	Isca2	422.998	0.424868	0.166006	-2.55935	0.0104869	0.247256	0.565278	0.427466	0.475238	0.647079	0.821657	1.00436
ENSMUSG00000022383.13	Ppara	38.1852	1.73555	0.678355	-2.55846	0.0105136	0.247422	-1.37131	-1.20613	-1.47604	-0.17976	0.563473	0.456383
ENSMUSG00000036185.9	Sapcd1	8.92131	3.72699	1.45699	-2.55801	0.0105272	0.247422	-0.997078	#NAME?	#NAME?	1.02116	-1.78321	2.33872
ENSMUSG00000029838.11	Ptn	4912.82	0.807947	0.315987	-2.5569	0.0105609	0.247824	0.366724	0.583091	1.01164	1.686	1.37129	1.0937
ENSMUSG00000071550.14	Cfap44	70.7244	-1.71899	0.672589	2.55578	0.0105951	0.248235	-2.01679	-0.368372	-2.17031	-3.28791	-3.12336	-2.78477
ENSMUSG00000040606.13	Kazn	1234.51	-0.415406	0.162616	2.55452	0.0106334	0.248741	-1.03024	-1.26928	-1.11583	-1.84918	-1.57423	-1.54894
ENSMUSG00000020808.3	Pimreg	9.37801	-2.96091	1.1595	2.55361	0.0106612	0.249002	#NAME?	2.98757	1.18374	0.125913	-1.24002	#NAME?
ENSMUSG00000072596.4	Ear2	6.22364	-4.6741	1.83087	2.55294	0.0106819	0.249094	6.19644	#NAME?	5.52704	2.66487	-0.565276	2.25344
ENSMUSG00000005360.14	Slc1a3	29169.8	0.44904	0.175977	-2.55169	0.0107202	0.249256	0.0531499	-0.0262205	0.292362	0.184081	0.657248	0.536012
ENSMUSG00000020427.11	Igfbp3	611.778	0.932633	0.365506	-2.55162	0.0107223	0.249256	1.6489	0.31216	0.607714	1.04102	1.98544	2.15732
ENSMUSG00000003484.4	Cyp4f18	5.87756	-4.28258	1.67911	2.55051	0.0107566	0.249663	5.61148	#NAME?	4.62216	-0.228593	#NAME?	-0.515203
ENSMUSG00000024735.13	Prpf19	3945.24	-0.340236	0.133547	2.54769	0.0108438	0.250715	1.10794	1.17791	0.929656	0.432845	0.799508	0.659386
ENSMUSG00000050963.7	Kcns2	248.904	-0.795373	0.312289	2.54691	0.0108681	0.250715	-0.192873	-0.621306	-0.64533	-1.5694	-1.46642	-1.18415
ENSMUSG00000025650.13	Col7a1	119.179	-1.33359	0.523617	2.54688	0.0108692	0.250715	-2.25192	-2.31724	-2.52183	-3.39116	-4.19808	-3.72314
ENSMUSG00000045038.14	Prkce	2850.76	-0.661103	0.259825	2.54441	0.0109461	0.251473	-0.64553	-0.557466	-1.00633	-1.67124	-1.50277	-1.32089
ENSMUSG00000021091.8	Serpina3n	148.321	-0.997337	0.391905	2.54484	0.0109327	0.251473	1.79109	1.6789	1.28304	-0.0472142	0.712119	0.785364
ENSMUSG00000020598.16	Nrcam	4486.58	0.365269	0.143569	-2.5442	0.0109527	0.251473	0.471697	0.445439	0.676234	0.890282	0.882123	0.632959
ENSMUSG00000021994.15	Wnt5a	107.687	0.98775	0.388379	-2.54326	0.0109823	0.251764	-0.98224	-1.53531	-1.02362	-0.151291	-0.231875	-0.525689
ENSMUSG00000041488.16	Stx3	465.033	-0.714845	0.28143	2.54004	0.0110838	0.253703	-2.36187	-2.34687	-3.42477	-3.39578	-3.50013	-3.59631
ENSMUSG00000030313.15	Dennd5b	1242.17	-0.474421	0.187032	2.53657	0.0111944	0.255392	0.318974	-0.0140588	0.29778	-0.393799	-0.170329	-0.565806
ENSMUSG00000018377.10	Vezf1	1050.07	-0.651481	0.25684	2.53652	0.011196	0.255392	-0.115997	0.312972	-0.61914	-0.681011	-0.726947	-1.12285
ENSMUSG00000019952.15	Poc1b	70.6809	-1.24102	0.489916	2.53312	0.0113052	0.25556	-1.87534	-0.823362	-1.33055	-2.23823	-3.49474	-2.21535
ENSMUSG00000029311.16	Hsd17b11	598.819	0.593546	0.234355	-2.53268	0.0113193	0.25556	1.7308	1.26053	0.676881	1.71091	1.6905	1.77387
ENSMUSG00000045854.4	Lyrm2	178.596	-0.688468	0.271832	2.5327	0.0113189	0.25556	1.68783	1.24408	0.716489	0.346043	0.152866	0.833649
ENSMUSG00000067847.13	Romo1	465.126	0.686929	0.271013	-2.53467	0.0112554	0.25556	2.0364	1.54502	2.37756	2.45013	2.43365	2.93799
ENSMUSG00000025576.17	Rbfox3	3687.26	-0.42424	0.167444	2.53362	0.0112891	0.25556	-0.698257	-0.755255	-0.985911	-1.31717	-1.37721	-1.29144
ENSMUSG00000030002.15	Dusp11	1557.05	-0.65717	0.25943	2.53313	0.011305	0.25556	-2.47003	-3.18001	-3.56355	-3.83714	-3.90501	-3.57119
ENSMUSG00000004885.5	Crabp2	54.4939	1.46083	0.577293	-2.53049	0.0113903	0.256773	-1.85541	-1.88596	-0.177964	0.521027	-0.764014	0.661785
ENSMUSG00000032454.9	Rbp2	2.88941	4.54099	1.79569	-2.52883	0.0114442	0.25721	#NAME?	#NAME?	#NAME?	1.25148	1.91704	3.55531
ENSMUSG00000031465.6	Angpt2	111.613	1.14241	0.451682	-2.52923	0.0114314	0.25721	1.38449	-0.485401	0.212086	1.8151	1.70394	0.911472
ENSMUSG00000028048.11	Gba	741.532	0.500297	0.197883	-2.52824	0.0114635	0.257251	0.713676	0.972125	1.27509	1.43967	1.33528	1.40212
ENSMUSG00000096210.2	H1f0	3192.75	-0.415738	0.164471	2.52772	0.0114805	0.257251	0.637641	0.443987	0.0337096	-0.209229	0.00260163	-0.169286
ENSMUSG00000035131.14	Brinp3	371.307	0.737732	0.291951	-2.52691	0.0115071	0.257459	0.323788	-0.253732	-0.7601	-0.05451	0.426743	0.793414
ENSMUSG00000034118.15	Tpst1	409.714	0.578449	0.229008	-2.52589	0.0115407	0.257822	-0.222595	-0.632796	-0.788177	0.265193	-0.20677	-0.234268
ENSMUSG00000008822.15	Acyp1	475.835	0.831133	0.329222	-2.52454	0.011585	0.258258	0.983095	1.09369	1.3476	2.18606	2.21001	1.12093
ENSMUSG00000020359.13	Phykpl	172.805	-0.7033	0.278618	2.52424	0.0115948	0.258258	-0.681311	-0.954439	-1.32743	-1.54814	-1.91235	-1.8726
ENSMUSG00000072235.6	Tuba1a	3070.53	0.544603	0.21591	-2.52237	0.0116569	0.259252	-3.01574	-2.98783	-2.68219	-2.37919	-2.50881	-2.35746
ENSMUSG00000042129.8	Rassf4	110.741	-0.915954	0.363408	2.52046	0.0117202	0.259884	0.207351	-0.217077	-1.02739	-1.70456	-1.40216	-0.860633
ENSMUSG00000018428.15	Akap1	647.044	-0.433216	0.17194	2.51957	0.0117497	0.260153	0.50577	0.479795	0.161418	-0.269441	-0.00362274	-0.15124
ENSMUSG00000066129.15	Kndc1	4108.61	-0.45404	0.180372	2.51724	0.0118277	0.26149	0.335475	0.230501	-0.0334967	-0.6772	-0.370676	-0.07673
ENSMUSG00000032854.12	Ugt8a	5522.32	0.795113	0.31624	-2.51427	0.0119278	0.262923	0.647556	0.591792	0.884964	2.12076	1.19243	0.930141
ENSMUSG00000041028.16	Ghitm	8953.76	-0.418566	0.166471	2.51435	0.0119253	0.262923	0.20802	0.220478	0.323928	-0.0445874	-0.196259	-0.523889
ENSMUSG00000048534.7	Jaml	57.315	1.13758	0.452667	-2.51307	0.0119686	0.263434	-0.111143	-1.31455	-0.559528	0.942874	0.538323	-0.211492
ENSMUSG00000047242.14	Taf9b	475.336	-0.467929	0.186428	2.50996	0.0120743	0.264587	0.254927	0.620329	0.162693	0.0281499	-0.251835	-0.425718
ENSMUSG00000026980.15	Ly75	179.47	0.963782	0.384146	-2.5089	0.0121108	0.264609	1.58126	0.370311	1.43724	2.09815	2.59961	1.622
ENSMUSG00000031791.8	Tmem38a	1617.84	0.485305	0.193405	-2.50927	0.012098	0.264609	0.444499	0.548335	0.553362	0.588009	0.791215	1.2883
ENSMUSG00000028998.6	Tomm7	1072.28	0.53622	0.214021	-2.50545	0.0122294	0.266113	2.23682	2.30107	1.60518	2.46668	2.19742	2.81633
ENSMUSG00000029186.12	Pi4k2b	36.2026	2.18671	0.873648	-2.50296	0.0123159	0.266113	-3.07146	#NAME?	-3.32771	-2.50201	-1.61595	-0.810594
ENSMUSG00000037791.15	Phf12	582.055	-0.605812	0.241957	2.50381	0.0122866	0.266113	-0.794923	-1.24281	-1.0107	-2.06762	-1.66204	-1.45697
ENSMUSG00000006154.13	Eps8l1	100.05	1.73871	0.694202	-2.50462	0.0122584	0.266113	#NAME?	-5.89587	-2.19282	-2.20502	-1.88092	-2.27409
ENSMUSG00000030157.5	Clec2d	158.413	1.02427	0.409137	-2.5035	0.0122972	0.266113	1.94719	1.74841	1.08292	2.31377	2.82486	2.17938
ENSMUSG00000022947.8	Cbr3	58.3047	1.01468	0.405183	-2.50426	0.0122707	0.266113	0.947191	1.25151	0.887237	2.11589	1.76036	1.96528
ENSMUSG00000078923.10	Ube2v1	11.0353	-3.52699	1.40821	2.50459	0.0122594	0.266113	0.0117341	0.433402	-1.83018	#NAME?	#NAME?	-1.84105
ENSMUSG00000039476.13	Prrx2	18.3267	2.67866	1.0711	-2.50085	0.0123897	0.266959	#NAME?	#NAME?	0.169817	0.0436959	1.06328	1.59347
ENSMUSG00000070436.12	Serpinh1	1619.33	0.795384	0.318075	-2.50062	0.0123975	0.266959	0.990903	1.79133	1.32471	2.52394	1.30631	2.32372
ENSMUSG00000030606.8	Hapln3	16.7203	1.99236	0.797105	-2.49949	0.0124372	0.267426	-0.345123	#NAME?	1.25265	2.11802	1.66232	2.00692
ENSMUSG00000031529.5	Tnks	2315.81	-0.330602	0.13231	2.49869	0.0124655	0.267503	-0.392103	-0.44264	-0.470414	-0.781158	-0.833161	-0.971647
ENSMUSG00000031231.4	Cox7b	2536.51	0.601572	0.240786	-2.49837	0.0124766	0.267503	1.45577	1.31362	1.44992	2.16118	1.83883	1.72238
ENSMUSG00000026491.13	Ahctf1	1151.24	-0.483507	0.193871	2.49397	0.0126325	0.267715	-1.11175	-1.19237	-1.4525	-1.53848	-1.78261	-2.17171
ENSMUSG00000096054.3	Syne1	13831.5	-1.28087	0.513087	2.49639	0.0125464	0.267715	0.804395	-0.190475	-1.15392	-1.6039	-1.38763	-1.04851
ENSMUSG00000008874.3	Clec3a	3.72205	7.79275	3.12233	-2.49582	0.0125668	0.267715	#NAME?	#NAME?	#NAME?	#NAME?	7.76653	2.32713
ENSMUSG00000038879.8	Nipal2	512.608	-0.403412	0.161689	2.49499	0.012596	0.267715	0.783127	0.710059	0.625325	0.205874	0.300863	0.0886347
ENSMUSG00000041974.10	Spidr	29.1559	2.03556	0.816168	-2.49405	0.0126296	0.267715	-1.1685	#NAME?	-3.56779	-0.258909	-1.3944	-0.204281
ENSMUSG00000054723.6	Vmac	95.8893	1.16782	0.467748	-2.49668	0.0125361	0.267715	-2.03002	-4.33201	-2.3475	-2.2104	-1.62063	-0.807713
ENSMUSG00000021290.6	Atp5mpl	2016.83	0.465978	0.187135	-2.49007	0.0127719	0.268395	2.49358	2.47729	1.98449	2.89975	2.57341	2.56686
ENSMUSG00000041642.18	Kif21b	523.342	-0.684	0.274534	2.4915	0.0127206	0.268395	-1.28898	-0.886879	-1.45888	-2.70691	-1.9169	-1.52255
ENSMUSG00000040354.14	Mars	1766.06	-0.528102	0.212042	2.49055	0.0127545	0.268395	0.292588	0.778523	0.563874	-0.343573	-0.192853	0.261695
ENSMUSG00000068917.12	Clk2	428.341	-0.661639	0.265783	2.4894	0.012796	0.268395	-0.950619	-0.1206	-1.30501	-1.53272	-1.4393	-1.55917
ENSMUSG00000049422.7	Chchd10	3565.67	0.497049	0.199642	-2.4897	0.0127852	0.268395	3.00991	3.17838	3.11254	3.24967	3.29055	3.91545
ENSMUSG00000040782.12	Cop1	716.689	-0.72292	0.290433	2.48911	0.0128064	0.268395	-2.54493	-1.95275	-3.15536	-3.61657	-3.38887	-2.97534
ENSMUSG00000042269.15	Fam92b	25.3872	1.83585	0.736746	-2.49183	0.0127085	0.268395	-0.205599	-2.41657	-2.15451	0.0812705	-0.200188	1.23208
ENSMUSG00000022174.8	Dad1	1271.78	0.692312	0.278694	-2.48413	0.0129868	0.271259	1.54692	1.63858	2.32158	2.38156	2.3064	2.76981
ENSMUSG00000054083.8	Capn12	4.88097	-4.07016	1.63932	2.48284	0.0130341	0.271259	1.77378	1.28321	#NAME?	#NAME?	#NAME?	#NAME?
ENSMUSG00000033004.15	Mycbp2	4283.51	-0.777121	0.312962	2.48312	0.0130238	0.271259	-0.569385	-1.48286	-1.37814	-2.18598	-1.80873	-1.899
ENSMUSG00000046167.5	Gldn	5.30498	-3.43101	1.38166	2.48325	0.0130188	0.271259	5.61148	2.28151	4.0209	0.699236	0.205924	-1.21034
ENSMUSG00000022108.8	Itm2b	35357.3	0.457498	0.184166	-2.48416	0.0129857	0.271259	1.45211	1.30357	1.69433	1.77858	2.0755	1.72182
ENSMUSG00000074141.13	Il4i1	4.57581	4.38906	1.7702	-2.47942	0.0131596	0.271972	#NAME?	#NAME?	#NAME?	0.952432	1.64677	3.00646
ENSMUSG00000039168.15	Dap	353.3	0.688406	0.277444	-2.48124	0.0130926	0.271972	0.265501	-0.168212	0.635071	0.594519	1.33576	0.568815
ENSMUSG00000040466.16	Blvrb	225.034	0.729379	0.29407	-2.48029	0.0131275	0.271972	1.02402	1.1948	1.57608	1.89901	1.8369	2.07867
ENSMUSG00000035829.13	Ppp1r26	283.467	-0.659123	0.265786	2.4799	0.0131418	0.271972	-0.793111	-0.822644	-1.03641	-2.03489	-1.6293	-1.35917
ENSMUSG00000027239.14	Mdk	487.211	0.933701	0.376534	-2.47973	0.0131483	0.271972	0.240164	1.36592	1.21874	1.88645	1.08194	2.27421
ENSMUSG00000041741.10	Pde3a	588.477	-0.690788	0.278723	2.4784	0.0131971	0.272369	-0.447823	-1.1067	-0.955729	-1.87804	-1.59042	-1.42071
ENSMUSG00000027288.16	Zfp106	2004.65	-0.721037	0.291342	2.47488	0.0133282	0.27268	-1.90875	-1.30873	-2.25434	-2.62566	-2.73477	-2.40166
ENSMUSG00000035674.13	Ndufa3	2140.28	0.458624	0.185426	-2.47335	0.0133854	0.27268	3.11066	2.80191	2.9101	3.09355	3.2307	3.59512
ENSMUSG00000026385.16	Dbi	5368.35	0.559043	0.225984	-2.47381	0.0133679	0.27268	1.39297	1.86419	1.88626	2.29816	1.94738	2.28541
ENSMUSG00000036111.8	Lmo1	107.812	-1.04238	0.421455	2.47328	0.0133879	0.27268	1.86992	2.45982	0.576971	0.101007	0.777583	0.909909
ENSMUSG00000037904.14	Ankrd9	178.474	1.06347	0.429869	-2.47393	0.0133636	0.27268	0.263764	-0.0365803	0.527807	1.0466	1.31972	1.38975
ENSMUSG00000066537.5	Vmn2r57	12.5613	-3.80818	1.53911	2.47427	0.0133509	0.27268	-1.59661	0.864075	#NAME?	#NAME?	-3.53246	#NAME?
ENSMUSG00000023150.14	Ivns1abp	1904.21	-0.505513	0.204242	2.47507	0.0133209	0.27268	-1.49172	-1.73445	-2.4037	-2.29446	-2.54771	-2.51796
ENSMUSG00000038095.15	Sbno1	2138.74	-0.459881	0.185802	2.47511	0.0133194	0.27268	-0.540525	-0.822649	-0.954133	-1.17304	-1.37489	-1.38453
ENSMUSG00000019518.11	Ap4m1	203.244	-0.641547	0.259411	2.47309	0.0133952	0.27268	-0.0633293	0.134456	-0.427264	-1.24355	-0.974967	-0.393581
ENSMUSG00000072946.12	Ptgr2	497.061	0.547868	0.221293	-2.47576	0.0132953	0.27268	0.963835	0.263659	0.569931	1.06753	1.11585	1.09147
ENSMUSG00000002107.18	Celf2	3737.07	-0.396325	0.160386	2.47107	0.0134709	0.273847	-0.328055	-0.557947	-0.443592	-0.932529	-0.661805	-1.22391
ENSMUSG00000020151.16	Ptprr	2815.67	0.49874	0.201965	-2.46944	0.0135325	0.273977	0.513817	0.41577	0.554978	1.08028	1.11138	0.451328
ENSMUSG00000070304.12	Scn2b	3284.84	0.417273	0.168963	-2.46962	0.0135257	0.273977	-0.865284	-0.696491	-0.716993	-0.28398	-0.394684	-0.616704
ENSMUSG00000074170.5	Plekhf1	191.327	0.679603	0.27511	-2.4703	0.0135001	0.273977	-1.02652	-0.957672	-0.696357	-0.391654	-0.206599	-0.326034
ENSMUSG00000103711.1	Tstd1	9.15695	-4.42838	1.79395	2.46851	0.0135675	0.274038	#NAME?	2.83598	-2.04076	#NAME?	-2.54217	#NAME?
ENSMUSG00000022464.14	Slc38a4	11.3266	3.38516	1.37143	-2.46834	0.013574	0.274038	#NAME?	#NAME?	-1.08332	0.524085	0.203837	2.08456
ENSMUSG00000022978.11	Mis18a	41.9251	1.47614	0.598136	-2.46791	0.0135906	0.274038	-1.5819	#NAME?	0.341284	0.851322	0.282089	-0.0566084
ENSMUSG00000020623.11	Map2k6	242.837	0.522529	0.21187	-2.46627	0.0136527	0.274917	0.00533266	-0.0462918	-0.000315056	0.527553	0.367537	0.371132
ENSMUSG00000021156.17	Zmynd11	1840.19	-0.39846	0.161602	2.46568	0.0136753	0.275001	-1.09421	-1.11112	-1.71499	-1.77493	-1.89796	-1.7158
ENSMUSG00000039176.17	Polg	585.182	-0.46453	0.188544	2.46378	0.0137481	0.275178	-0.931869	-0.762324	-1.09626	-1.49848	-1.5017	-1.45033
ENSMUSG00000021374.10	Nup153	1310.24	-0.639736	0.259694	2.46342	0.0137619	0.275178	-0.0643472	0.232812	-0.157577	-0.433366	-0.508414	-1.239
ENSMUSG00000017861.11	Mybl2	9.89355	-3.61445	1.46803	2.46211	0.0138123	0.275178	-1.25051	1.59335	#NAME?	#NAME?	-2.36594	#NAME?
ENSMUSG00000023084.11	Lrrc71	13.9024	3.38907	1.37611	-2.46278	0.0137863	0.275178	#NAME?	#NAME?	#NAME?	-2.50578	-1.00966	-1.55235
ENSMUSG00000033313.11	Fbxl8	15.7867	2.22119	0.901452	-2.46401	0.0137392	0.275178	-2.16211	#NAME?	0.489282	1.66432	0.899206	1.78966
ENSMUSG00000017009.3	Sdc4	1726.99	0.914758	0.371538	-2.46208	0.0138134	0.275178	0.788316	1.0934	1.01883	1.29434	1.35759	2.45132
ENSMUSG00000002475.16	Abhd3	2024.06	0.438971	0.178336	-2.46148	0.0138365	0.275271	1.1335	1.42135	1.45614	1.50978	1.75789	1.79953
ENSMUSG00000030091.17	Nup210	876.499	-0.471345	0.191535	2.46088	0.0138597	0.275364	0.665885	0.772481	0.858243	-0.0842258	0.252181	0.400895
ENSMUSG00000006307.16	Kmt2b	960.531	-0.558891	0.227314	2.45868	0.013945	0.276164	-1.08697	-1.03466	-1.65459	-2.14593	-1.90977	-1.64895
ENSMUSG00000025809.15	Itgb1	2595.34	0.542805	0.220796	-2.45841	0.0139555	0.276164	1.02008	0.710266	0.463682	1.57305	1.01153	0.907064
ENSMUSG00000029306.8	Ibsp	16.9816	7.03937	2.86476	-2.45723	0.0140014	0.276703	#NAME?	#NAME?	2.01066	6.1776	9.3515	7.42218
ENSMUSG00000024042.7	Sik1	206.962	1.03765	0.422398	-2.45656	0.0140273	0.276848	0.425539	-1.35593	0.2695	1.35972	0.929296	0.283299
ENSMUSG00000037347.7	Chst7	37.5929	1.35883	0.553325	-2.45575	0.0140592	0.277111	-0.886648	0.701312	0.589587	1.83932	1.51099	0.962002
ENSMUSG00000016150.15	Tenm1	2641.81	-0.712694	0.290388	2.45428	0.0141166	0.277509	-0.232691	-0.0729197	-0.763783	-1.04818	-0.952788	-1.31767
ENSMUSG00000003039.9	Fam32a	629.314	0.620322	0.252734	-2.45445	0.0141102	0.277509	-2.13503	-2.00701	-1.96878	-1.24663	-1.70263	-1.6492
ENSMUSG00000020330.16	Hmmr	8.20194	3.78912	1.54433	-2.45358	0.0141444	0.277688	#NAME?	#NAME?	#NAME?	0.38428	-0.324891	-1.95034
ENSMUSG00000040183.13	Ankrd6	157.307	-1.08463	0.442295	2.45228	0.0141954	0.278065	-0.338549	-0.402886	-1.29662	-2.91095	-1.17862	-1.94808
ENSMUSG00000022387.17	Brd1	905.912	-0.59542	0.242863	2.45167	0.0142196	0.278065	-0.417132	-0.211299	-1.11761	-1.21015	-1.25965	-1.21889
ENSMUSG00000073616.10	Cops9	714.897	0.763277	0.311307	-2.45184	0.0142126	0.278065	1.30545	1.37075	1.2018	1.67682	1.52592	2.47653
ENSMUSG00000039716.12	Dock3	2703.76	-0.46362	0.189204	2.45037	0.014271	0.278705	0.396646	-0.0464772	0.248068	-0.603882	-0.0860333	-0.389331
ENSMUSG00000038538.17	Ubn2	988.681	-0.758043	0.30954	2.44893	0.0143279	0.279343	-2.66443	-2.54765	-3.83429	-3.84119	-3.81318	-3.67973
ENSMUSG00000039367.11	Sec24c	1586.1	-0.399801	0.163277	2.4486	0.0143411	0.279343	0.30735	0.591366	0.36492	-0.213763	-0.158512	0.145399
ENSMUSG00000021188.14	Trip11	1085.46	-0.417488	0.170678	2.44605	0.0144431	0.28023	-0.485017	-0.110011	-0.429966	-0.660425	-0.83436	-1.0609
ENSMUSG00000052566.8	Hook2	124.215	-0.827622	0.338304	2.44638	0.0144297	0.28023	-0.294317	-0.25133	0.0803314	-1.54029	-0.89186	-0.838056
ENSMUSG00000022744.12	Cldnd1	1388.33	0.330703	0.135198	-2.44607	0.0144423	0.28023	0.362813	0.596323	0.537224	0.631122	0.747983	0.822653
ENSMUSG00000029096.15	Htra3	252.257	0.697974	0.285426	-2.44538	0.0144701	0.280389	0.593964	0.723713	-0.075884	1.04153	0.879294	1.21269
ENSMUSG00000032532.7	Cck	1086.43	1.0715	0.438434	-2.44392	0.0145285	0.28091	2.3413	2.47773	4.10684	3.91816	4.39903	4.00285
ENSMUSG00000044550.11	Tceal3	586.501	0.694309	0.284114	-2.44377	0.0145347	0.28091	-0.878417	-1.86986	-1.58454	-0.898162	-0.959014	-0.540997
ENSMUSG00000060935.6	Tmem263	414.082	0.510928	0.209354	-2.4405	0.0146669	0.281977	-0.666504	-1.2362	-1.24789	-0.547524	-0.633426	-0.671381
ENSMUSG00000015092.9	Edf1	1192.02	0.606645	0.248665	-2.4396	0.0147035	0.281977	0.492734	0.162207	0.309213	1.25979	0.639982	0.551244
ENSMUSG00000001467.5	Cyp51	1983.3	0.635288	0.260223	-2.44132	0.0146338	0.281977	0.692828	0.567092	0.812453	1.68235	1.13028	0.860901
ENSMUSG00000025794.9	Rpl14	1169.21	0.523849	0.214726	-2.43962	0.0147026	0.281977	-1.03507	-0.785098	-1.03116	-0.496578	-0.945824	-0.137731
ENSMUSG00000023120.9	Ldc1	8.89782	4.5531	1.86904	-2.43606	0.0148481	0.284385	#NAME?	#NAME?	#NAME?	0.79789	#NAME?	1.51456
ENSMUSG00000039611.2	Tmem246	685.354	0.347208	0.142685	-2.43338	0.0149584	0.284668	0.422136	0.312285	0.351624	0.505303	0.541629	0.794705
ENSMUSG00000042686.5	Jph1	374.827	-0.76882	0.315882	2.43388	0.0149378	0.284668	-0.545226	-0.0326193	-1.17206	-1.23199	-1.59841	-1.32885
ENSMUSG00000032113.16	Chek1	13.2217	3.54005	1.45421	-2.43434	0.0149189	0.284668	#NAME?	#NAME?	#NAME?	-0.740522	-0.661367	-2.24849
ENSMUSG00000026411.17	Tmem9	1106.08	0.605567	0.248788	-2.43407	0.0149302	0.284668	0.836109	1.11167	1.01034	1.1467	1.38867	1.9251
ENSMUSG00000022211.9	Carmil3	706.066	-1.06379	0.437148	2.43348	0.0149543	0.284668	-1.06302	-0.572302	-2.53101	-3.24644	-2.66107	-1.65635
ENSMUSG00000052105.17	Mtcl1	2581.06	-0.422589	0.173696	2.43292	0.0149776	0.28467	-1.03232	-1.10986	-1.24141	-1.89076	-1.50779	-1.57562
ENSMUSG00000026737.12	Pip4k2a	817.35	-0.395747	0.162733	2.43189	0.0150205	0.285121	-0.641932	-0.415993	-0.872824	-1.09963	-1.15408	-1.14536
ENSMUSG00000022369.13	Mtbp	92.631	-0.838318	0.344847	2.43098	0.0150579	0.285467	0.248221	-0.0278217	-0.357492	-0.925183	-0.944958	-1.00077
ENSMUSG00000014551.8	Mrps25	455.531	0.516139	0.212923	-2.42406	0.0153479	0.286438	0.648911	0.455805	0.853545	1.16243	1.27396	0.81613
ENSMUSG00000016194.14	Hsd11b1	1240.44	0.625529	0.257954	-2.42496	0.01531	0.286438	0.622906	1.36649	1.14743	1.33743	1.50243	1.93601
ENSMUSG00000027469.16	Tpx2	42.8189	2.0214	0.832958	-2.42678	0.0152337	0.286438	-2.10904	#NAME?	-1.16599	1.01605	-0.214396	-1.03493
ENSMUSG00000078515.4	Ddi2	679.405	-0.581277	0.239772	2.42429	0.0153382	0.286438	-1.7227	-1.04241	-1.57254	-1.90678	-1.93275	-2.46519
ENSMUSG00000032640.10	Chsy1	157.086	0.819234	0.337667	-2.42616	0.0152597	0.286438	-1.59345	-2.97334	-1.26087	-1.35195	-1.09952	-0.732273
ENSMUSG00000030317.8	Timp4	2710.43	0.871557	0.359615	-2.42358	0.0153684	0.286438	0.250036	0.0136156	-0.161867	0.247084	0.411013	1.44463
ENSMUSG00000006205.13	Htra1	4115.63	0.527992	0.21784	-2.42376	0.0153609	0.286438	1.97574	1.80173	2.03675	2.00903	2.2848	2.76871
ENSMUSG00000034755.18	Pcdh11x	187.855	-0.89583	0.368866	2.42861	0.015157	0.286438	1.59887	1.82441	0.354351	0.125273	0.486138	0.0959427
ENSMUSG00000048578.11	Mlec	1294.38	0.51092	0.210484	-2.42736	0.0152092	0.286438	-2.28905	-2.24203	-2.18234	-2.06201	-1.90073	-1.55436
ENSMUSG00000031832.15	Taf1c	139.191	-0.777248	0.320733	2.42335	0.0153782	0.286438	0.279432	0.246808	0.323699	-0.563222	-0.821602	-0.352852
ENSMUSG00000021621.15	Zcchc9	150.631	0.793518	0.327346	-2.4241	0.0153466	0.286438	-0.993411	-1.13918	-0.616416	0.292175	-0.446435	-0.439661
ENSMUSG00000030782.16	Tgfb1i1	167.654	0.781951	0.322162	-2.4272	0.0152158	0.286438	-0.811852	-0.540613	-0.0970816	0.22616	-0.0824044	0.633375
ENSMUSG00000059920.9	4930453N24Rik	349.796	-0.768968	0.31716	2.42454	0.0153279	0.286438	-0.689966	-0.711431	-1.94366	-1.6396	-2.04669	-2.06373
ENSMUSG00000052688.12	Rab7b	73.0761	1.38477	0.570972	-2.42529	0.0152963	0.286438	-1.7404	-4.59863	-1.85699	-0.297511	-1.27887	-1.22672
ENSMUSG00000003955.8	Fam162a	698.82	0.419204	0.17305	-2.42244	0.0154169	0.2868	1.39854	1.69446	1.43759	1.65144	2.04662	1.80535
ENSMUSG00000037031.10	Tspan15	611.211	0.585453	0.24181	-2.42113	0.0154725	0.287475	0.404069	-0.21437	0.060826	0.442629	0.302669	0.957551
ENSMUSG00000025758.10	Plk4	51.3142	-1.30587	0.539489	2.42058	0.0154959	0.287553	-0.170952	-0.728261	-1.5821	-1.71179	-3.02092	-2.0393
ENSMUSG00000003346.14	Abhd17a	816.708	0.587415	0.24286	-2.41874	0.0155744	0.287668	-0.417694	-0.408245	-0.527411	-0.590412	0.15045	0.459702
ENSMUSG00000032449.13	Slc25a36	720.432	-0.847594	0.350312	2.41954	0.0155401	0.287668	-3.59237	-2.35822	-3.59553	-4.69534	-4.15758	-3.48999
ENSMUSG00000045333.15	Zfp423	355.116	-0.567854	0.234784	2.41862	0.0155794	0.287668	-0.0546	0.170256	0.194488	-1.08079	-0.403217	-0.287606
ENSMUSG00000034327.17	Kctd9	407.829	-0.55067	0.227608	2.41938	0.015547	0.287668	-0.457162	-0.651994	-0.58918	-1.35879	-0.849106	-1.5435
ENSMUSG00000000399.10	Ndufa9	2830.39	-0.242986	0.100535	2.41692	0.0156524	0.287947	1.6838	1.72521	1.59166	1.37985	1.32431	1.28194
ENSMUSG00000030671.9	Pde3b	384.308	0.619235	0.256183	-2.41716	0.0156421	0.287947	-2.20746	-2.35309	-3.04244	-2.30961	-2.03522	-1.6653
ENSMUSG00000029725.10	Ppp1r35	210.948	0.789412	0.326885	-2.41495	0.0157374	0.289153	1.43138	1.95515	1.61704	2.22439	2.33673	2.59672
ENSMUSG00000027350.8	Chgb	11774	0.587321	0.243478	-2.41222	0.0158559	0.290972	0.532953	0.614698	0.0488253	1.32501	0.437094	0.835505
ENSMUSG00000048387.8	Osr1	64.0712	1.01949	0.423147	-2.4093	0.0159832	0.292946	0.408033	0.979085	-0.332766	0.838723	1.11366	1.84823
ENSMUSG00000001053.15	N4bp3	181.396	0.684838	0.284418	-2.40786	0.0160465	0.293745	0.0807854	-0.298788	-0.0309941	0.618986	0.772313	0.105354
ENSMUSG00000069208.9	Zfp825	72.439	-1.13049	0.469696	2.40685	0.0160908	0.293896	-0.501667	-0.576223	-2.48076	-2.33019	-1.886	-2.8479
ENSMUSG00000026933.17	Camsap1	1497.93	-0.577059	0.23998	2.40461	0.0161897	0.294881	-1.01582	-0.963219	-1.43531	-1.77323	-1.59586	-2.00467
ENSMUSG00000039956.9	Mrap	5.95482	4.61184	1.91824	-2.40421	0.0162075	0.294881	#NAME?	#NAME?	#NAME?	0.125913	#NAME?	2.75376
ENSMUSG00000004113.18	Cacna1b	1081.36	-0.587615	0.244533	2.40301	0.0162608	0.29549	0.0235701	-0.307161	-0.798736	-1.2582	-1.08618	-0.739494
ENSMUSG00000015488.14	Cacfd1	461.196	0.580225	0.24167	-2.4009	0.0163548	0.296837	-1.05326	-0.941773	-0.800569	-0.940702	-0.308697	-0.170002
ENSMUSG00000022483.17	Col2a1	377.283	2.76963	1.15403	-2.39996	0.0163969	0.297238	-0.155618	0.933996	1.97711	1.65598	4.99947	1.83702
ENSMUSG00000064307.13	Lrrc51	46.2077	-1.39673	0.58214	2.39931	0.0164262	0.29736	-0.913364	-1.76834	-1.2959	-2.39481	-2.75595	-3.27898
ENSMUSG00000035236.17	Scai	1213.44	-0.431525	0.179894	2.39877	0.0164503	0.29736	-1.41609	-1.42975	-1.53751	-1.83952	-1.80334	-2.38903
ENSMUSG00000023175.15	Bsg	14357.4	0.444626	0.185509	-2.39678	0.0165397	0.298235	1.89308	2.27827	1.70162	2.31785	2.24899	2.39456
ENSMUSG00000054641.10	Mmrn1	11.5457	2.45896	1.02606	-2.39651	0.0165519	0.298235	0.773782	1.46951	-0.420999	4.05828	3.24208	1.95959
ENSMUSG00000054823.16	Nsd3	1228.54	-0.62631	0.261394	2.39604	0.0165733	0.29826	-1.10225	-0.826885	-1.8135	-1.82129	-1.8341	-2.1021
ENSMUSG00000066000.12	Zfp979	45.896	3.13784	1.31092	-2.39362	0.0166831	0.299227	#NAME?	#NAME?	#NAME?	-2.57053	-4.07427	#NAME?
ENSMUSG00000040659.3	Efhd2	976.979	0.449909	0.187954	-2.39373	0.0166782	0.299227	-0.101041	0.290305	0.180962	0.238901	0.345744	0.845929
ENSMUSG00000023883.13	Phf10	1265.63	-0.594024	0.248179	2.39353	0.0166873	0.299227	-1.36595	-0.822282	-1.98745	-1.80606	-2.14068	-2.18002
ENSMUSG00000020739.11	Nup85	686.673	-0.370116	0.154666	2.39299	0.0167116	0.299257	0.439697	0.297723	0.254608	-0.272891	-0.188852	0.0649209
ENSMUSG00000090799.2	Klhl33	597.137	-0.708446	0.296098	2.39261	0.0167292	0.299257	-2.64123	-1.21583	-2.03133	-2.83105	-2.85995	-2.41228
ENSMUSG00000020038.10	Cry1	834.664	-0.399264	0.166914	2.39204	0.016755	0.29936	0.513832	-0.0549464	0.00465751	-0.305182	-0.380754	-0.322022
ENSMUSG00000020186.7	Csrp2	167.042	0.996932	0.416973	-2.39088	0.0168081	0.299705	0.860789	0.720442	1.17309	2.66961	1.36234	1.14371
ENSMUSG00000026979.16	Psd4	9.68845	-2.46365	1.03095	2.38968	0.0168629	0.300207	-0.200769	1.90154	1.47241	-1.17222	-2.47101	-0.960591
ENSMUSG00000041132.11	N4bp2l1	335.004	-0.516721	0.216369	2.38815	0.0169334	0.300402	-0.611219	-0.647249	-0.913112	-1.28609	-1.18372	-1.55815
ENSMUSG00000029477.14	Morn3	5.17418	3.67351	1.53796	-2.38857	0.0169142	0.300402	#NAME?	#NAME?	#NAME?	0.771407	-0.198246	0.665819
ENSMUSG00000033233.17	Trim45	68.6303	-1.26711	0.530585	2.38813	0.0169343	0.300402	-1.02575	0.34826	-0.381802	-1.47387	-1.76826	-1.8707
ENSMUSG00000022371.16	Col14a1	40.8238	1.63554	0.685864	-2.38464	0.0170958	0.300877	0.318484	-0.890902	1.47549	2.66693	1.01255	1.87299
ENSMUSG00000031608.13	Galnt7	459.709	0.619217	0.259598	-2.38529	0.0170656	0.300877	-0.917957	-1.42226	-2.00134	-0.601596	-1.1118	-1.05896
ENSMUSG00000064325.4	Hhip	406.385	0.66478	0.278613	-2.38603	0.0170314	0.300877	-0.447289	-0.419385	-0.190604	0.694116	0.189555	-0.178041
ENSMUSG00000048540.8	Nhlh2	171.921	0.84313	0.353407	-2.38572	0.0170456	0.300877	-2.57254	-2.25912	-1.77332	-1.66212	-1.3619	-1.14331
ENSMUSG00000042625.16	Safb2	764.526	-0.39468	0.165514	2.38457	0.0170991	0.300877	-1.70736	-1.40626	-1.73174	-2.02746	-2.12903	-2.15814
ENSMUSG00000006445.3	Epha2	89.8494	1.02099	0.428178	-2.3845	0.0171024	0.300877	0.581339	0.309719	1.19025	2.27558	1.73548	1.2165
ENSMUSG00000002015.5	Bcap31	1681.97	0.441986	0.185453	-2.38328	0.0171589	0.30116	1.34407	1.39376	1.23533	1.98222	1.35136	1.64522
ENSMUSG00000053460.8	Ggcx	387.199	0.67659	0.284053	-2.38191	0.0172229	0.301573	0.123836	1.21286	1.00303	1.6999	1.06418	1.34246
ENSMUSG00000090115.7	Usp49	98.386	-1.19463	0.501476	2.38223	0.017208	0.301573	-2.01018	-1.93883	-2.71804	-4.18798	-4.12528	-2.57273
ENSMUSG00000029775.14	Klhdc10	2300.05	-0.405918	0.170509	2.38062	0.0172835	0.301925	-1.5072	-1.47888	-1.80216	-1.92036	-2.24656	-2.11032
ENSMUSG00000006411.12	Nectin4	125.504	-0.804261	0.33783	2.38066	0.0172814	0.301925	0.0110871	0.463111	0.11616	-0.864458	-0.898747	-0.412368
ENSMUSG00000028832.11	Stmn1	1203.18	0.675123	0.283654	-2.38009	0.0173084	0.302005	-0.840462	-1.03926	-0.649646	-0.0489379	-0.335242	-0.360496
ENSMUSG00000021549.14	Rasa1	982.344	-0.385641	0.162061	2.3796	0.0173315	0.302055	-0.305909	-0.315083	-0.747256	-0.751174	-0.936362	-1.11789
ENSMUSG00000034402.3	Kcnh5	112.973	-1.61265	0.678102	2.37818	0.0173981	0.302861	5.23053	3.3828	2.43522	1.3246	1.89228	1.7883
ENSMUSG00000038902.14	Pogz	1106.61	-0.480102	0.201921	2.37767	0.0174224	0.30293	0.0377503	0.352721	0.0219693	-0.629736	-0.407413	-0.274702
ENSMUSG00000046785.8	Epm2aip1	3325.82	-0.470617	0.198135	2.37523	0.017538	0.304585	-0.961693	-0.852985	-0.722072	-1.29349	-1.21927	-1.74612
ENSMUSG00000031871.9	Cdh5	650.466	0.682747	0.287592	-2.37401	0.0175961	0.304694	1.09628	1.24381	1.76101	2.37376	1.78229	1.65249
ENSMUSG00000051149.15	Adnp	893.879	-0.721369	0.303887	2.37381	0.0176057	0.304694	7.65294	7.04715	7.12484	7.10995	6.49593	5.90369
ENSMUSG00000028755.3	Cda	34.2395	-1.75477	0.740013	2.37127	0.0177271	0.305791	1.22285	3.11092	3.32225	-0.654996	0.983549	1.76412
ENSMUSG00000026814.16	Eng	888.276	0.664548	0.280258	-2.3712	0.0177306	0.305791	1.25384	1.31193	1.55919	2.46134	1.64575	1.76943
ENSMUSG00000045822.4	Zswim3	116.5	0.851102	0.358826	-2.37191	0.0176965	0.305791	-0.0130848	-1.13393	0.0256726	0.855385	0.33849	0.361485
ENSMUSG00000052395.17	Rft1	192.102	0.669551	0.282457	-2.37045	0.0177662	0.306052	0.238835	-0.0386453	0.106392	0.513799	0.363519	1.16635
ENSMUSG00000004630.18	Pcp2	12699.6	0.755034	0.318753	-2.36871	0.0178502	0.306782	2.54836	2.0987	3.39274	3.29781	3.55286	3.3954
ENSMUSG00000028369.15	Svep1	431.845	0.677527	0.286125	-2.36794	0.0178875	0.306782	0.199453	0.196025	0.41637	1.06846	0.821108	0.635854
ENSMUSG00000043987.18	Cep164	257.522	-0.689555	0.29125	2.36757	0.0179052	0.306782	-1.06033	-1.66179	-1.36686	-1.9402	-2.13676	-2.23054
ENSMUSG00000029640.17	Usp12	546.677	-0.61848	0.261244	2.36744	0.0179116	0.306782	-2.29851	-2.6581	-2.95616	-3.51609	-3.499	-3.05971
ENSMUSG00000030814.17	Bcl7c	310.763	-0.731027	0.309295	2.36353	0.0181019	0.30827	-2.24157	-1.61766	-2.19896	-2.87289	-2.4858	-3.12988
ENSMUSG00000074754.4	Smim26	439.269	0.503003	0.212805	-2.36368	0.0180944	0.30827	2.63028	3.09656	2.47599	3.22838	2.91442	3.30609
ENSMUSG00000047044.7	D030056L22Rik	244.445	0.752603	0.31833	-2.36422	0.0180681	0.30827	-2.78537	-2.00191	-1.96617	-1.28832	-2.18654	-1.24899
ENSMUSG00000028191.11	Bcl10	229.631	-0.535519	0.226464	2.3647	0.0180448	0.30827	-0.0226698	0.209802	-0.264544	-0.5277	-0.70055	-0.700662
ENSMUSG00000038555.7	Reep2	3975.98	0.522003	0.220739	-2.3648	0.0180397	0.30827	0.963204	0.666374	1.22202	1.2039	1.72272	1.26697
ENSMUSG00000026618.11	Iars2	889.512	-0.327515	0.138669	2.36185	0.0181842	0.308966	0.413741	0.274266	0.456192	-0.108043	0.0692379	-0.0734689
ENSMUSG00000033488.11	Cryzl2	207.462	0.674289	0.285476	-2.36198	0.0181777	0.308966	0.198696	1.04449	0.5902	1.12093	0.98916	1.48792
ENSMUSG00000053580.16	Tanc2	1058.38	-0.603132	0.255504	2.36056	0.0182474	0.309687	0.0534928	-0.640824	-0.676003	-1.39125	-0.762216	-1.23217
ENSMUSG00000006736.9	Tspan31	869.579	0.496145	0.210249	-2.3598	0.018285	0.309971	1.00495	1.27454	1.0152	1.57762	1.07803	1.8043
ENSMUSG00000025795.8	Rassf3	182.694	0.712493	0.301984	-2.35937	0.0183059	0.309973	-1.79995	-2.18647	-0.782033	-0.890499	-0.786665	-0.912871
ENSMUSG00000032193.9	Ldlr	762.899	0.473293	0.200696	-2.35826	0.0183608	0.310549	0.780461	1.35378	1.42587	1.66406	1.52413	1.5484
ENSMUSG00000042216.13	Sgsm1	1174.56	-0.430479	0.182598	2.35753	0.0183971	0.310811	0.113529	0.318132	0.0822119	-0.513158	-0.424211	-0.11385
ENSMUSG00000039801.7	Cplane1	749.055	-0.86682	0.367781	2.35689	0.0184285	0.310989	-1.00874	-1.31121	-2.4967	-2.95363	-2.50517	-2.02865
ENSMUSG00000054871.5	Tmem158	226.651	1.03901	0.440997	-2.35606	0.01847	0.311337	1.52044	1.49735	1.67116	1.58995	2.68048	3.15692
ENSMUSG00000037499.9	Nenf	611.842	0.651293	0.276493	-2.35555	0.0184952	0.31141	1.84186	2.01819	2.07288	2.21158	2.19242	3.05282
ENSMUSG00000019790.17	Stxbp5	1141.1	-0.41604	0.176725	2.35416	0.0185645	0.31152	-0.563266	-1.00786	-0.927012	-1.41792	-1.09667	-1.50901
ENSMUSG00000030247.9	Kcnj8	89.0651	1.0195	0.433038	-2.3543	0.0185578	0.31152	0.206183	-0.0379398	-0.612288	0.963801	0.721967	0.533586
ENSMUSG00000023949.7	Tcte1	9.92245	2.85338	1.21192	-2.35444	0.0185507	0.31152	-1.87553	#NAME?	-0.420999	0.284198	1.26637	2.25344
ENSMUSG00000050035.7	Fhl4	10.3995	-2.89419	1.23026	2.3525	0.0186479	0.311889	1.5026	0.641682	-0.0364921	#NAME?	-2.13225	-1.7228
ENSMUSG00000040481.17	Bptf	1647.42	-0.663972	0.282245	2.35247	0.0186493	0.311889	-1.13156	-1.26996	-1.80998	-1.7805	-2.2083	-2.41978
ENSMUSG00000035262.5	Amh	23.7927	-1.90454	0.809382	2.35307	0.0186189	0.311889	1.22285	-0.769782	1.65668	-1.76366	-1.34249	-0.469793
ENSMUSG00000063015.12	Ccni	2199.75	-0.642256	0.273063	2.35205	0.0186704	0.311892	-3.30757	-3.87053	-4.54749	-4.71711	-4.64269	-4.35392
ENSMUSG00000028651.12	Ppie	217.778	-0.648887	0.275996	2.35107	0.0187194	0.312361	1.01569	1.60559	0.604353	0.582305	-0.0434046	0.477224
ENSMUSG00000016427.7	Ndufa1	1592.77	0.446284	0.18989	-2.35022	0.0187621	0.312373	3.07121	3.32057	2.88768	3.2979	3.27406	3.76975
ENSMUSG00000001016.12	Ilf2	1960.87	-0.394717	0.167991	2.34964	0.0187917	0.312518	0.928491	1.12962	0.756197	0.577113	0.525461	0.232971
ENSMUSG00000035992.15	Fnip1	1451.65	-0.381971	0.162616	2.34891	0.0188283	0.312776	0.0814088	-0.337462	-0.262446	-0.629915	-0.496793	-0.819546
ENSMUSG00000041696.14	Rasl12	62.2657	1.20142	0.511642	-2.34817	0.0188659	0.313052	-0.503678	-2.36858	-0.413237	0.102214	0.108335	0.821515
ENSMUSG00000079523.8	Tmsb10	435.905	1.01654	0.432994	-2.34771	0.0188893	0.313092	0.604744	0.355332	0.14364	1.78692	1.27949	0.387008
ENSMUSG00000056019.12	Zfp709	184.222	-0.72387	0.308477	2.34659	0.018946	0.313524	-0.936428	-0.732696	-1.90847	-2.09083	-1.9745	-1.86075
ENSMUSG00000026656.15	Fcgr2b	82.3354	-1.16894	0.49819	2.34637	0.0189575	0.313524	1.69689	2.10972	-0.22578	0.0669157	-0.0765476	0.599652
ENSMUSG00000064373.12	Selenop	3812.92	0.523049	0.223531	-2.33994	0.0192868	0.314208	0.26703	-0.0568628	-0.427479	0.526933	0.02876	0.514485
ENSMUSG00000030822.15	Prr14	396.281	-0.473376	0.202021	2.3432	0.0191194	0.314208	-0.576577	-0.616609	-1.10475	-1.24205	-1.32516	-1.42995
ENSMUSG00000075012.4	Fjx1	427.085	0.705043	0.30123	-2.34055	0.0192553	0.314208	-0.6633	-0.106181	-0.197393	0.294267	-0.0137803	0.649036
ENSMUSG00000025362.6	Rps26	709.579	0.42538	0.181708	-2.34101	0.0192316	0.314208	0.502208	0.568086	0.327101	0.896603	0.527456	0.967792
ENSMUSG00000044864.16	Ankrd50	799.014	-0.524556	0.22422	2.33947	0.0193111	0.314208	-0.614353	-0.8111	-1.07688	-1.81968	-1.1805	-1.40647
ENSMUSG00000021508.11	Cxcl14	575.642	0.808999	0.345787	-2.33959	0.0193049	0.314208	0.94788	1.35351	0.739442	0.931184	1.72803	2.33735
ENSMUSG00000049871.14	Nlrc3	31.2535	-2.05905	0.879531	2.34108	0.019228	0.314208	-1.48443	1.47028	-1.80497	-1.96037	-2.23772	-3.3173
ENSMUSG00000021643.15	Serf1	148.56	0.760915	0.325177	-2.34	0.0192837	0.314208	1.67267	1.05336	0.598223	1.40564	1.75507	2.04201
ENSMUSG00000044452.10	Zfp507	372.933	-0.431567	0.184179	2.34319	0.0191194	0.314208	-0.160152	-0.251792	-0.244403	-0.946186	-0.630376	-0.700495
ENSMUSG00000021118.7	Plek2	24.526	-1.35019	0.576824	2.34073	0.0192463	0.314208	1.02734	2.29379	2.18525	0.481579	0.580724	0.25925
ENSMUSG00000005262.13	Ufd1	1073.09	-0.398493	0.170273	2.34032	0.0192673	0.314208	0.191673	0.479761	0.161742	-0.110531	-0.125548	-0.441384
ENSMUSG00000003154.15	Foxj2	650.202	-0.552412	0.23575	2.34321	0.0191188	0.314208	-0.608391	-0.562539	-0.881515	-1.47796	-1.43047	-1.11403
ENSMUSG00000036840.5	Siah1a	381.249	-0.62876	0.268341	2.34314	0.0191223	0.314208	-0.271541	-0.898929	-1.22632	-1.80831	-1.52483	-1.27148
ENSMUSG00000026511.7	Srp9	431.451	0.675118	0.288705	-2.33844	0.0193645	0.314325	-2.55836	-3.78541	-2.42931	-2.07922	-2.28376	-2.1753
ENSMUSG00000021144.14	Mta1	1001.17	-0.547306	0.234263	2.33629	0.0194763	0.315796	0.892949	1.27988	0.671914	0.00143383	0.134653	0.736563
ENSMUSG00000037625.7	Cldn11	10636.2	0.438662	0.187838	-2.33533	0.0195264	0.316263	2.53108	2.37909	2.50894	2.66365	2.82155	3.01396
ENSMUSG00000024914.16	Drap1	804.756	0.408627	0.175033	-2.33457	0.0195659	0.31656	0.137642	0.0439571	0.255684	0.436136	0.481711	0.498797
ENSMUSG00000031562.15	Dctd	43.9043	-1.18132	0.506339	2.33307	0.0196447	0.317145	-0.307743	0.277391	-0.316043	-1.18806	-1.03894	-2.3862
ENSMUSG00000003402.14	Prkcsh	1718.55	0.449847	0.192806	-2.33315	0.01964	0.317145	1.17177	1.16517	1.47369	1.79529	1.33815	1.76501
ENSMUSG00000063229.15	Ldha	2028	0.411369	0.176429	-2.33164	0.0197195	0.317548	-0.280108	-0.496922	-0.630823	0.0694946	-0.308529	-0.246215
ENSMUSG00000033902.12	Mapkbp1	811.192	-0.494896	0.212238	2.3318	0.0197112	0.317548	-0.872762	-0.88982	-1.19984	-2.03329	-1.34717	-1.38521
ENSMUSG00000022913.16	Psmg1	265.308	-0.483559	0.207414	2.33138	0.0197335	0.317548	1.49213	1.68127	1.38411	1.14671	1.00213	0.659752
ENSMUSG00000024857.16	Cabp2	58.0788	1.13692	0.487773	-2.33085	0.0197614	0.317654	-0.356765	0.565782	-1.14981	0.873304	0.846312	0.792883
ENSMUSG00000037416.13	Dmxl1	1799.9	-0.480945	0.206407	2.33008	0.0198017	0.317958	-0.234755	-0.833516	-0.689786	-0.952256	-1.00754	-1.49758
ENSMUSG00000020803.3	Txndc17	342.496	0.439623	0.188879	-2.32754	0.0199366	0.318136	0.724802	0.537573	0.532707	1.05756	0.875107	0.919798
ENSMUSG00000020577.17	Tspan13	3075.26	0.417372	0.179229	-2.32871	0.0198745	0.318136	0.883927	0.755839	0.963129	1.09318	1.18788	1.31057
ENSMUSG00000033237.19	Arid2	1104.16	-0.43256	0.185843	2.32756	0.0199357	0.318136	-0.14146	-0.263206	-0.387317	-0.805884	-0.70125	-0.839356
ENSMUSG00000028161.17	Ppp3ca	11015.1	-0.483321	0.207618	2.32793	0.0199156	0.318136	-0.255784	0.0863569	-0.461662	-0.608751	-0.646775	-1.0628
ENSMUSG00000027935.14	Rab13	104.581	0.904436	0.388374	-2.32878	0.019871	0.318136	0.11131	-0.726869	-0.516469	0.568628	-0.188811	0.855553
ENSMUSG00000040761.16	Spen	1183.28	-0.714397	0.306943	2.32746	0.0199409	0.318136	-0.845537	-0.930417	-1.21775	-1.63674	-1.50669	-2.1604
ENSMUSG00000031927.9	1700012B09Rik	5.50539	4.04442	1.73984	-2.32459	0.020094	0.319929	#NAME?	#NAME?	-1.33231	1.11852	1.88912	2.97486
ENSMUSG00000042302.14	Ehbp1	691.055	-0.385909	0.166044	2.32415	0.0201177	0.319929	-0.668643	-0.642496	-1.0272	-1.24962	-1.11697	-1.43247
ENSMUSG00000029428.13	Stx2	124.754	-0.824455	0.354955	2.3227	0.0201953	0.320821	-1.23613	-0.996872	-1.83635	-2.1926	-2.12652	-2.43138
ENSMUSG00000032462.14	Pik3cb	431.566	-0.572589	0.2466	2.32193	0.0202366	0.321135	-0.487905	-0.121412	-0.803164	-0.945096	-1.0935	-1.29109
ENSMUSG00000051650.11	B3gnt2	198.365	1.22457	0.527492	-2.32149	0.0202603	0.321156	5.64731	4.08923	3.63846	5.66862	5.248	5.30237
ENSMUSG00000006315.9	Tmem147	1449.07	0.402114	0.173282	-2.32058	0.0203095	0.321265	1.79254	1.8857	1.9553	1.88911	2.12994	2.52522
ENSMUSG00000043895.6	S1pr2	59.0632	0.942715	0.406444	-2.31942	0.0203722	0.321574	0.322578	0.404425	-0.324428	1.28638	0.807981	1.02035
ENSMUSG00000028883.17	Sema3a	587.964	0.664622	0.286656	-2.31853	0.0204205	0.321995	0.476203	-0.148201	0.597671	0.844952	1.41213	0.37761
ENSMUSG00000001510.8	Dlx3	10.5304	2.41968	1.04387	-2.318	0.0204493	0.322017	#NAME?	#NAME?	0.253447	0.886825	2.33479	1.13245
ENSMUSG00000025216.9	Lbx1	44.7318	1.27803	0.551606	-2.31692	0.0205083	0.322017	-0.710366	-0.244239	-0.108353	0.952164	1.18789	0.31814
ENSMUSG00000026987.16	Baz2b	794.201	-0.504999	0.217946	2.31709	0.020499	0.322017	-1.05091	-1.6104	-1.72271	-1.91027	-1.89226	-2.34034
ENSMUSG00000028111.4	Ctsk	128.153	0.923379	0.398679	-2.31609	0.0205532	0.322136	0.352886	1.91475	0.487218	1.54139	2.1004	1.93883
ENSMUSG00000020737.12	Jpt1	328.768	0.498897	0.215419	-2.31594	0.0205617	0.322136	-0.219573	0.275796	0.0214784	0.375597	0.367369	0.527675
ENSMUSG00000005823.9	Gpr108	502.294	0.400358	0.172897	-2.31559	0.0205807	0.322136	0.514179	0.713933	0.546987	0.885121	0.638487	1.16338
ENSMUSG00000074649.6	BC029722	287.087	0.965782	0.41727	-2.31452	0.020639	0.322709	0.4839	0.429788	0.727777	0.233371	1.36186	2.24188
ENSMUSG00000060098.11	Prmt7	707.623	-0.40154	0.173543	2.31378	0.0206797	0.323007	0.808343	1.14459	1.13884	0.27167	0.609524	0.694896
ENSMUSG00000036499.9	Eea1	1059.75	-0.454824	0.196618	2.31324	0.0207094	0.323131	-0.440324	-0.650342	-0.685382	-0.880451	-1.00947	-1.56206
ENSMUSG00000015697.14	Setdb1	749.929	-0.480797	0.20815	2.30986	0.020896	0.323335	-0.60294	-0.38555	-0.672739	-0.895643	-1.14537	-1.37376
ENSMUSG00000047904.6	Sstr2	67.365	-1.49104	0.64507	2.31144	0.0208085	0.323335	2.90181	-1.05118	1.45153	-0.933775	0.0384867	0.805406
ENSMUSG00000068739.13	Sars	3856.94	-0.353766	0.153148	2.30996	0.0208904	0.323335	0.668298	0.68599	0.871609	0.466646	0.216014	0.201665
ENSMUSG00000038496.16	Slc19a3	114.064	0.763607	0.330459	-2.31074	0.020847	0.323335	0.54499	0.137585	0.542882	1.20246	1.09042	1.00752
ENSMUSG00000041378.2	Cldn5	1149.81	0.892824	0.386325	-2.31107	0.020829	0.323335	1.55049	0.925503	1.94358	2.79651	1.84822	2.38454
ENSMUSG00000023046.6	Igfbp6	423.563	0.800019	0.346162	-2.31111	0.0208267	0.323335	1.56185	2.54367	2.00009	2.52131	2.25972	3.22254
ENSMUSG00000032235.15	Ice2	183.196	-0.652383	0.282405	2.3101	0.0208828	0.323335	-0.762621	-0.983474	-1.02919	-1.64658	-1.36185	-2.16885
ENSMUSG00000032680.11	6820408C15Rik	40.9584	1.32182	0.572474	-2.30896	0.020946	0.323772	-1.92728	#NAME?	0.0171774	-0.167332	0.0495584	0.15062
ENSMUSG00000079283.2	2310009B15Rik	47.9233	1.64958	0.714725	-2.30799	0.0209997	0.324266	-0.636435	-2.30646	-0.130406	-1.09839	1.21789	1.56599
ENSMUSG00000038174.14	Fam126b	1670.22	-0.642607	0.278856	2.30444	0.0211978	0.326823	-1.66175	-1.38705	-2.39928	-2.53158	-2.43529	-2.53338
ENSMUSG00000031586.17	Rbpms	88.8058	0.910201	0.395011	-2.30424	0.0212092	0.326823	0.0393163	0.460183	-0.046118	1.34492	0.681578	0.755978
ENSMUSG00000031374.13	Zfp92	19.5618	-2.35619	1.02379	2.30144	0.021367	0.328915	2.44435	#NAME?	0.817376	-2.96037	-1.81301	-0.448933
ENSMUSG00000020801.8	Med31	318.408	0.666682	0.289827	-2.30028	0.0214326	0.329158	1.78994	1.16032	1.96647	2.46562	2.15884	2.16021
ENSMUSG00000032324.11	Tspan3	6758.06	0.543503	0.236265	-2.3004	0.0214257	0.329158	1.38627	1.37449	1.18603	1.32899	1.60585	2.2562
ENSMUSG00000017307.16	Acot8	210.276	0.694803	0.30209	-2.29999	0.021449	0.329158	-0.181666	-0.126034	0.375019	0.664066	0.165432	0.979795
ENSMUSG00000034636.9	Zyg11b	2864.44	-0.350282	0.152327	2.29955	0.021474	0.329201	-0.580424	-0.488029	-0.555014	-1.10217	-0.845674	-1.00765
ENSMUSG00000061531.8	Tmem236	13.3989	-3.12419	1.35952	2.298	0.0215615	0.330067	1.72419	#NAME?	-1.08332	-2.02392	-4.55365	#NAME?
ENSMUSG00000002222.14	Rmnd5a	3531.4	-0.475636	0.206999	2.29777	0.0215747	0.330067	-1.95713	-2.03798	-2.24513	-2.49381	-2.624	-2.78583
ENSMUSG00000074736.10	Syndig1	1337.99	0.51508	0.224301	-2.29638	0.0216542	0.330943	0.00125256	-0.450631	-0.0358154	0.159813	0.513883	0.137549
ENSMUSG00000040865.15	Ino80d	565.376	-0.677904	0.295274	2.29585	0.0216847	0.33107	-2.06774	-2.7366	-2.81601	-3.06402	-3.48142	-3.22635
ENSMUSG00000039158.11	Akna	151.033	-1.29694	0.565064	2.2952	0.0217216	0.331083	-0.835137	0.0445653	-2.64783	-2.3834	-2.23131	-1.8634
ENSMUSG00000031310.16	Zmym3	1127.08	-0.35432	0.154384	2.29505	0.02173	0.331083	-0.370264	-0.282819	-0.25111	-0.804182	-0.716197	-0.724467
ENSMUSG00000026674.9	Ddr2	945.566	-0.833769	0.363442	2.29409	0.0217852	0.331585	-1.32108	-0.402567	-0.925853	-1.2406	-2.3633	-1.75307
ENSMUSG00000028773.8	Fabp3	511.079	0.693323	0.302376	-2.29291	0.0218529	0.332276	-0.231404	-0.729984	-0.713883	-0.414805	-0.011857	0.510806
ENSMUSG00000031889.9	D230025D16Rik	459.661	-0.467755	0.204052	2.29233	0.0218867	0.33245	0.680079	0.278337	0.301949	-0.152388	-0.0269309	-0.23882
ENSMUSG00000050808.13	Muc15	50.2669	1.35513	0.591303	-2.29177	0.0219188	0.332599	-0.694003	-0.854377	0.790763	0.758784	2.19336	0.4843
ENSMUSG00000021967.4	Mrpl57	349.016	0.490601	0.214293	-2.2894	0.0220563	0.334344	1.06907	1.03358	1.0842	1.22646	1.52741	1.56799
ENSMUSG00000015337.5	Endog	309.354	0.763966	0.333908	-2.28795	0.0221402	0.335275	3.57734	2.1872	3.09848	3.34273	3.95376	3.634
ENSMUSG00000025409.14	Mbd6	414.694	-0.837291	0.366199	2.28643	0.0222289	0.336277	-1.88193	-1.27555	-2.83076	-3.77073	-2.80234	-2.27694
ENSMUSG00000020527.14	Myo19	123.596	-1.13748	0.497624	2.28582	0.0222646	0.336475	-1.96836	-1.77065	-3.52375	-3.41529	-4.38539	-3.02711
ENSMUSG00000057363.12	Uxs1	476.096	-0.470528	0.206103	2.28298	0.0224317	0.337443	0.333119	0.533811	-0.170704	-0.407392	-0.336504	-0.20357
ENSMUSG00000041571.9	Selenow	4086.19	0.870654	0.382143	-2.27835	0.022706	0.337443	0.367552	0.443459	0.443355	0.217117	1.05701	1.90887
ENSMUSG00000047155.13	Cyp4x1	163.614	-0.621141	0.272738	2.27743	0.0227608	0.337443	0.419303	0.501504	0.362177	-0.294872	-0.360649	-0.199501
ENSMUSG00000026879.14	Gsn	6670.21	0.659809	0.289625	-2.27815	0.0227179	0.337443	1.53078	1.71724	2.0532	2.70591	2.03671	2.17025
ENSMUSG00000026785.14	Pkn3	18.6902	-1.76443	0.773564	2.28091	0.0225535	0.337443	1.15652	1.45737	0.658768	-0.564079	-0.964872	-0.881591
ENSMUSG00000021339.4	Mrs2	846.341	-0.401517	0.17589	2.28277	0.0224439	0.337443	-1.70202	-1.53874	-1.20914	-2.02255	-2.01871	-1.86202
ENSMUSG00000015224.10	Cyp2j9	970.386	0.596627	0.262014	-2.27708	0.0227815	0.337443	1.43649	0.952893	0.54322	1.43986	1.26251	1.76699
ENSMUSG00000028278.14	Rragd	1158.61	-0.623694	0.273655	2.27913	0.0226594	0.337443	-2.47864	-2.04464	-2.49645	-3.04564	-3.30507	-2.79794
ENSMUSG00000048920.8	Fkrp	377.947	0.651012	0.285489	-2.28034	0.0225875	0.337443	-0.578429	-0.541918	-0.249791	-0.405003	-0.0159833	0.636054
ENSMUSG00000027709.9	Mccc1	475.187	-0.461565	0.202371	2.28078	0.0225612	0.337443	-0.493292	-0.106926	-0.414463	-0.661701	-1.06362	-0.986081
ENSMUSG00000029816.10	Gpnmb	72.3067	-1.15003	0.505015	2.27722	0.0227733	0.337443	1.23475	1.93598	2.07046	-0.245101	0.969908	1.12027
ENSMUSG00000069170.14	Adgrv1	85.2863	-1.26471	0.55521	2.2779	0.0227326	0.337443	0.327004	-0.0152803	0.118532	-0.696588	-2.42632	-0.926759
ENSMUSG00000030322.12	Mbd4	205.891	-0.669753	0.29361	2.2811	0.0225425	0.337443	-0.637354	-0.507162	-0.378537	-1.08573	-0.939077	-2.02635
ENSMUSG00000023274.14	Cd4	8.50289	-2.99453	1.31314	2.28044	0.0225817	0.337443	-0.0122101	4.11381	-0.136676	-0.497855	-2.05057	-1.11965
ENSMUSG00000040204.6	Pclaf	10.7745	3.42779	1.5015	-2.28292	0.0224351	0.337443	#NAME?	#NAME?	#NAME?	-1.00946	-1.13889	-2.06624
ENSMUSG00000039929.14	Urb1	235.821	-0.621462	0.272346	2.28188	0.0224963	0.337443	0.0866877	0.283078	0.160803	-0.459442	-0.737036	-0.431203
ENSMUSG00000040666.19	Sh3bgr	98.4326	0.785881	0.344909	-2.27852	0.0226959	0.337443	-0.518029	-0.302386	-0.314486	0.487959	0.245839	0.236788
ENSMUSG00000032446.14	Eomes	346.079	0.908123	0.397884	-2.28238	0.022467	0.337443	-0.11238	-1.09599	-0.766195	1.15543	-0.6423	-0.0871488
ENSMUSG00000027997.9	Casp6	80.3172	0.874171	0.384065	-2.2761	0.0228398	0.33797	0.0740157	-0.177846	0.692448	1.1668	1.21112	0.77599
ENSMUSG00000033799.10	Tasor2	716.279	-0.443148	0.194741	2.27557	0.0228716	0.338104	-0.944623	-0.874515	-1.29722	-1.27536	-1.62198	-1.82024
ENSMUSG00000059142.16	Zfp945	240.295	-0.647854	0.284859	2.27429	0.0229483	0.338903	-0.891792	-1.1743	-1.70048	-1.83647	-2.04173	-2.09558
ENSMUSG00000020166.15	Cnot2	1183.84	-0.439312	0.193237	2.27344	0.0229997	0.338971	-0.0195623	-0.0662784	-0.537874	-0.506735	-0.776245	-0.924746
ENSMUSG00000031732.12	Phlpp2	608.452	-0.484939	0.213278	2.27375	0.0229813	0.338971	-0.529562	-0.787162	-1.24457	-1.62013	-1.38151	-1.26642
ENSMUSG00000049791.4	Fzd4	355.101	0.806935	0.355185	-2.27187	0.0230942	0.339569	-0.72209	-1.77102	-0.483074	-0.242569	-0.451681	-0.0571858
ENSMUSG00000028826.14	Maco1	1334.79	-0.333979	0.14702	2.27165	0.0231074	0.339569	0.119299	-0.00271601	-0.298444	-0.418675	-0.499399	-0.536859
ENSMUSG00000040140.15	Tdrd6	17.6537	-3.22193	1.41864	2.27113	0.0231388	0.339696	-0.748499	#NAME?	-1.13668	#NAME?	-4.71633	-4.21149
ENSMUSG00000027002.13	Nckap1	6767.1	-0.383475	0.168912	2.27026	0.0231918	0.340139	0.374037	0.326662	-0.085517	-0.297273	-0.117852	-0.376636
ENSMUSG00000044337.5	Ackr3	319.223	0.746097	0.328854	-2.26878	0.0232819	0.340548	1.12407	1.4519	2.1601	2.69896	2.09822	1.88548
ENSMUSG00000031492.13	Chrnb3	18.4854	-2.84281	1.25307	2.26867	0.0232883	0.340548	2.82413	4.66401	2.01066	#NAME?	0.0171006	3.73031
ENSMUSG00000022018.7	Rgcc	269.284	0.78201	0.344605	-2.26929	0.0232506	0.340548	1.11099	1.74136	1.59386	2.73185	2.04882	1.81979
ENSMUSG00000047216.8	Cdh19	185.593	0.628391	0.277034	-2.26828	0.0233119	0.340559	0.787168	0.33917	0.425739	1.35382	0.848499	1.02952
ENSMUSG00000090877.3	Hspa1b	32.2068	1.8072	0.797237	-2.26683	0.0234007	0.341522	-1.58354	#NAME?	-0.634218	0.791764	-1.07967	0.198951
ENSMUSG00000038195.6	Rilp	37.4666	1.1642	0.514142	-2.26437	0.0235516	0.341972	-0.789634	-2.06823	-1.04189	-0.107753	-0.370274	0.184048
ENSMUSG00000074457.10	S100a16	902.093	0.437891	0.193408	-2.26408	0.0235692	0.341972	0.358966	0.34194	0.653835	0.570638	0.811196	1.05772
ENSMUSG00000072889.9	Nfxl1	233.917	-0.537996	0.237526	2.265	0.0235127	0.341972	-0.546413	-0.227544	-1.00655	-1.15308	-1.47178	-1.00136
ENSMUSG00000040435.12	Ppp1r15a	259.135	0.927267	0.409529	-2.26423	0.0235601	0.341972	-3.31718	-3.15678	-2.57079	-2.40561	-2.46593	-1.73997
ENSMUSG00000091971.3	Hspa1a	29.0595	1.64374	0.72601	-2.26408	0.0235692	0.341972	-2.72072	-0.264147	-1.02116	1.27361	-0.671708	0.144708
ENSMUSG00000031314.18	Taf1	1389.8	-0.360961	0.159615	2.26146	0.0237311	0.34232	-0.379048	-0.72369	-0.958391	-1.11414	-1.13524	-1.13169
ENSMUSG00000000804.14	Usp32	1628.5	-0.477647	0.211187	2.26172	0.0237146	0.34232	-0.57259	-1.24469	-1.25609	-1.69921	-1.44059	-1.57467
ENSMUSG00000037876.17	Jmjd1c	2732.15	-0.397273	0.175591	2.2625	0.0236666	0.34232	-0.80667	-0.990093	-1.12346	-1.51517	-1.26854	-1.5937
ENSMUSG00000033429.10	Mcee	327.651	0.590822	0.261255	-2.26148	0.0237298	0.34232	1.59135	1.1411	0.816462	1.94777	1.2877	1.78321
ENSMUSG00000056222.15	Spock1	3757.12	0.371497	0.164245	-2.26184	0.0237071	0.34232	0.598031	0.680491	0.787371	0.746543	1.19205	0.942669
ENSMUSG00000023055.10	Calcoco1	872.7	0.576115	0.254656	-2.26232	0.0236774	0.34232	-0.252254	-0.331626	0.359934	0.487778	0.541076	0.207358
ENSMUSG00000037224.15	Zfyve28	905.165	-0.585009	0.258784	2.26061	0.0237836	0.342702	-0.49235	0.000569117	-0.785413	-1.67695	-0.956382	-0.70319
ENSMUSG00000005054.7	Cstb	684.155	0.366522	0.162161	-2.26023	0.0238069	0.342702	2.22659	2.21719	2.19097	2.46604	2.39672	2.60857
ENSMUSG00000062785.14	Kcnc3	8438.11	0.634717	0.280859	-2.25991	0.0238266	0.342702	-0.401521	-0.19064	0.413493	0.197216	0.792838	0.501926
ENSMUSG00000014355.10	Anapc1	2130.46	-0.363485	0.160868	2.25952	0.0238508	0.342721	0.0109947	-0.203999	0.0362287	-0.482525	-0.432959	-0.603097
ENSMUSG00000059146.12	Ntrk3	3102.91	-0.522575	0.23139	2.25841	0.0239198	0.342721	-1.2568	-1.29459	-1.61653	-1.85547	-2.19541	-1.93628
ENSMUSG00000024258.4	Polr2d	381.062	0.391849	0.173496	-2.25855	0.0239113	0.342721	0.66009	0.515279	0.568159	0.73691	0.977362	0.931709
ENSMUSG00000022914.17	Brwd1	1498.08	-0.457831	0.202698	2.25869	0.0239029	0.342721	-1.33154	-1.42257	-1.73053	-2.10095	-2.14152	-1.88816
ENSMUSG00000017778.14	Cox7c	690.217	1.03145	0.456916	-2.25741	0.0239826	0.34329	-1.19912	-2.18383	-1.16456	0.130563	-0.802576	-0.978052
ENSMUSG00000029544.16	Cabp1	833.975	-0.502303	0.222567	2.25686	0.024017	0.343452	-1.28512	-0.998313	-0.719186	-1.76982	-1.46229	-1.52076
ENSMUSG00000090100.7	Ttbk2	1623.78	-0.517679	0.22953	2.25539	0.0241087	0.344195	-0.874474	-1.03779	-1.28824	-1.96677	-1.58147	-1.52062
ENSMUSG00000074923.10	Pak6	41.6097	-1.87069	0.829584	2.25497	0.0241349	0.344195	1.05943	0.335842	-0.248213	-4.12102	-2.55036	0.236002
ENSMUSG00000025608.9	Podxl	631.377	0.495882	0.219941	-2.25462	0.0241574	0.344195	0.513204	0.312922	0.334668	1.12832	0.69638	0.515967
ENSMUSG00000015568.16	Lpl	122.093	-0.839904	0.372537	2.25455	0.0241613	0.344195	1.17895	0.988457	0.67178	-0.0635988	-0.154277	0.301552
ENSMUSG00000022521.10	Crebbp	2076.51	-0.456626	0.202657	2.2532	0.0242467	0.345082	1.20825	1.33356	0.933982	0.463019	0.773256	0.616602
ENSMUSG00000038259.4	Gdf5	3.2457	-5.2118	2.31398	2.25231	0.0243028	0.345221	#NAME?	7.03762	#NAME?	1.15063	#NAME?	1.3899
ENSMUSG00000051329.13	Nup160	362.708	-0.552733	0.245458	2.25184	0.0243322	0.345308	0.271677	-0.196859	0.0328855	-0.312331	-0.595772	-0.939955
ENSMUSG00000027122.15	Arl14ep	1032.9	-0.49732	0.220956	2.25077	0.0244004	0.345862	-0.670054	-0.329016	-0.312924	-0.599225	-1.11175	-1.36383
ENSMUSG00000040610.7	Tlx3	110.979	1.14361	0.508265	-2.25002	0.0244476	0.345958	1.54739	0.381986	2.25736	2.66514	2.09444	2.60541
ENSMUSG00000034932.4	Mrpl54	240.459	0.69606	0.309502	-2.24897	0.0245144	0.346574	0.974884	0.823134	0.888635	1.57433	1.1178	1.86854
ENSMUSG00000026241.5	Nppc	143.877	0.987279	0.439194	-2.24793	0.0245806	0.346705	1.44842	2.17612	3.11536	3.43567	3.55666	2.74805
ENSMUSG00000038668.14	Lpar1	1187.67	0.691388	0.307594	-2.24773	0.0245934	0.346705	0.0310901	0.280738	-0.121066	0.20039	0.262656	1.30372
ENSMUSG00000029455.14	Aldh2	1172.13	0.625315	0.278151	-2.24811	0.024569	0.346705	0.891447	0.268435	1.38906	1.55309	1.1533	1.50376
ENSMUSG00000012117.13	Dhdds	843.741	-0.337019	0.150049	2.24606	0.0247004	0.346721	0.233	0.44423	0.0519104	-0.276728	-0.103185	-0.205256
ENSMUSG00000037990.18	Sh3rf3	62.6902	-1.34969	0.600789	2.24652	0.0246705	0.346721	-1.021	-2.23098	-2.79824	-4.64924	-2.88913	-3.33707
ENSMUSG00000032258.15	Lca5	171.224	-0.838087	0.373164	2.24589	0.024711	0.346721	-1.57609	-0.76384	-2.55628	-2.34876	-2.8888	-2.18604
ENSMUSG00000040557.14	Mettl27	38.968	-1.24558	0.554468	2.24643	0.0246762	0.346721	-0.684986	-0.110417	-0.775474	-1.45534	-2.36519	-1.68971
ENSMUSG00000038644.14	Pold1	164.09	-0.741174	0.329955	2.24629	0.0246855	0.346721	0.13214	1.25393	0.318371	-0.154567	-0.767914	0.0662059
ENSMUSG00000028882.13	Ppp1r8	777.268	-0.466333	0.207724	2.24496	0.0247706	0.347231	0.345101	0.546681	-0.057111	-0.302555	-0.400434	-0.128462
ENSMUSG00000030245.10	Golt1b	441.543	0.485874	0.2165	-2.24422	0.0248181	0.34757	-0.678486	-0.826372	-0.395246	-0.0577392	-0.383585	-0.231851
ENSMUSG00000020389.19	Cdkl3	134.964	-0.790018	0.352107	2.24368	0.0248527	0.347728	-0.796273	-0.0305906	-1.41242	-1.40817	-1.75772	-1.61016
ENSMUSG00000025780.7	Itih5	1246.16	0.540764	0.241085	-2.24305	0.0248939	0.347977	-0.339428	-0.149914	0.0710504	0.628669	0.0140597	0.196056
ENSMUSG00000059995.12	Atxn7l3	976.983	-0.827795	0.369198	2.24214	0.0249521	0.348139	-2.67559	-2.20637	-3.26912	-4.71421	-3.26735	-3.12123
ENSMUSG00000058297.16	Spock2	16394.7	0.326721	0.145708	-2.24231	0.0249416	0.348139	0.380169	0.257446	0.611369	0.574587	0.787165	0.600278
ENSMUSG00000028464.16	Tpm2	232.726	0.953636	0.425438	-2.24154	0.0249911	0.348356	0.606766	-0.665924	0.482587	1.58198	1.11195	0.522572
ENSMUSG00000024063.13	Lbh	456.706	0.554048	0.247338	-2.24004	0.0250882	0.349056	-0.932722	-0.883124	-1.04029	-0.699628	-0.875585	0.0394498
ENSMUSG00000025823.9	Pdia4	1699.58	0.520986	0.232557	-2.24025	0.0250749	0.349056	2.03445	1.95162	1.35985	2.49146	1.80714	2.24424
ENSMUSG00000073609.9	D2hgdh	128.94	-0.69629	0.311408	2.23594	0.0253555	0.349857	-0.467257	0.0498094	-0.442044	-1.3345	-1.41714	-0.485329
ENSMUSG00000027242.14	Wdr76	81.0751	-1.09	0.48687	2.23879	0.0251696	0.349857	-1.19092	0.0541502	-0.351172	-1.10295	-1.34026	-2.33707
ENSMUSG00000044712.15	Slc38a6	112.668	-0.77025	0.344599	2.2352	0.025404	0.349857	-1.48096	-1.05709	-1.16694	-2.39419	-1.87893	-2.10083
ENSMUSG00000037174.18	Elf2	622.346	0.449324	0.201017	-2.23525	0.0254011	0.349857	-0.994747	-1.28052	-0.937149	-0.583016	-0.597983	-0.962104
ENSMUSG00000032369.13	Plscr1	104.337	0.771868	0.345205	-2.23597	0.0253535	0.349857	-0.0915721	-0.00678616	-0.35146	0.930615	0.345391	0.239032
ENSMUSG00000116138.1	C030006K11Rik	215.026	0.574148	0.256521	-2.23821	0.0252074	0.349857	0.111117	0.57233	0.621487	0.502934	1.31032	0.86813
ENSMUSG00000027220.2	Syt13	1752.87	0.400915	0.179251	-2.23661	0.0253117	0.349857	-0.446652	-0.314262	-0.188885	-0.260502	-0.0888035	0.304878
ENSMUSG00000037152.11	Ndufc1	1014.25	0.476208	0.212958	-2.23615	0.0253417	0.349857	2.27648	2.77555	2.62579	2.9464	2.53913	3.33658
ENSMUSG00000020745.15	Pafah1b1	7230.49	-0.349232	0.156141	2.23665	0.0253094	0.349857	-0.941604	-0.917178	-1.15664	-1.35733	-1.26665	-1.74756
ENSMUSG00000037977.6	6430571L13Rik	360.433	0.609213	0.272512	-2.23555	0.0253814	0.349857	-1.23097	-0.813125	-1.01227	-0.83285	-0.60361	-0.154866
ENSMUSG00000038777.19	Sema6c	236.12	0.656245	0.293646	-2.23482	0.0254294	0.349883	-0.686579	-1.00837	-0.815349	-1.07405	0.0084561	0.0398448
ENSMUSG00000020387.15	Jade2	295.808	-0.647248	0.290104	2.23109	0.025675	0.350659	-0.647865	-0.747352	-0.442689	-1.65277	-1.35051	-1.11788
ENSMUSG00000027104.18	Atf2	1410.04	-0.366644	0.164405	2.23012	0.0257395	0.350659	-0.249241	-0.629779	-0.861334	-1.00444	-0.998498	-1.09102
ENSMUSG00000057110.15	Cntrl	200.696	-0.677529	0.303734	2.23067	0.0257033	0.350659	-1.50972	-1.65703	-2.50082	-2.91305	-2.3196	-2.71749
ENSMUSG00000085584.3	Rtl9	30.7804	-1.73632	0.778387	2.23066	0.0257037	0.350659	0.752489	-1.21662	-0.251124	-2.05211	-1.09911	-2.79431
ENSMUSG00000028766.10	Alpl	173.044	0.822532	0.368605	-2.23148	0.0256497	0.350659	1.10889	2.43465	1.67263	2.48295	2.24957	2.63729
ENSMUSG00000028838.11	Extl1	187.137	-0.816168	0.365743	2.23153	0.0256459	0.350659	-0.269262	0.0412295	-0.357676	-1.90748	-1.15293	-0.539807
ENSMUSG00000031285.14	Dcx	206.591	0.910794	0.407898	-2.2329	0.0255558	0.350659	-1.48872	-3.01215	-2.68043	-2.13345	-1.03087	-1.57228
ENSMUSG00000021594.11	Srd5a1	177.271	1.13981	0.511199	-2.22969	0.0257682	0.350659	-1.48467	-5.12612	-1.7813	-1.14765	-1.45692	-0.542971
ENSMUSG00000022702.16	Hira	264.899	-0.733118	0.328564	2.23128	0.0256626	0.350659	0.796128	1.08793	-0.189232	-0.669892	-0.0579672	0.117111
ENSMUSG00000033499.14	Larp4b	1099.05	-0.361982	0.162333	2.22987	0.0257558	0.350659	-0.724564	-0.615009	-0.846716	-1.07757	-1.03428	-1.48185
ENSMUSG00000033389.16	Arhgap44	1536.54	-0.415701	0.186521	2.22871	0.0258332	0.351112	-0.498679	-0.497935	-0.439715	-1.20416	-0.961057	-0.845142
ENSMUSG00000040605.7	Bace2	132.697	0.643222	0.288637	-2.22848	0.0258486	0.351112	0.736063	0.858359	0.490949	1.43705	0.729743	1.55685
ENSMUSG00000002129.11	Sf3a1	1420.99	0.442318	0.198704	-2.22601	0.0260134	0.35112	-0.0941734	-0.0633745	0.367293	0.648866	0.31231	0.321873
ENSMUSG00000020220.16	Vps13d	1911.11	-0.677212	0.304186	2.22631	0.0259934	0.35112	-0.166893	-0.474454	-0.633708	-1.76086	-1.00548	-0.917812
ENSMUSG00000068748.7	Ptprz1	10537.5	0.358192	0.1608	-2.22756	0.0259098	0.35112	0.635636	0.51008	0.85542	0.922185	0.873775	0.9791
ENSMUSG00000064294.12	Aox3	26.5399	2.16607	0.973034	-2.2261	0.0260078	0.35112	-1.57054	#NAME?	-1.18637	1.30392	-2.30206	0.679963
ENSMUSG00000002814.15	Top3a	94.155	0.822546	0.369619	-2.22539	0.026055	0.35112	-1.17687	-0.762357	-0.658254	-0.585541	-0.0604365	0.159898
ENSMUSG00000038963.15	Slco4a1	569.386	0.732392	0.329121	-2.2253	0.0260612	0.35112	1.10804	0.699609	0.636006	0.889971	1.63443	1.77211
ENSMUSG00000037944.8	Ccr7	2.44281	-6.24482	2.80502	2.2263	0.0259943	0.35112	#NAME?	#NAME?	6.112	1.55488	#NAME?	#NAME?
ENSMUSG00000029730.16	Mcm7	203.621	-0.745003	0.334592	2.2266	0.0259739	0.35112	-0.92768	-1.0451	-1.11574	-1.33918	-2.39852	-2.01856
ENSMUSG00000035469.17	Rcbtb1	580.088	-0.466779	0.209856	2.22429	0.0261291	0.351717	-1.25985	-1.01511	-1.8146	-2.11797	-1.89196	-1.70213
ENSMUSG00000040274.11	Cdk6	28.5624	1.76062	0.791885	-2.22332	0.0261941	0.351955	-3.39549	#NAME?	-1.21777	-0.638959	-1.49209	-0.524179
ENSMUSG00000098022.7	Zfp82	15.0283	1.81881	0.81827	-2.22275	0.0262326	0.352156	0.403392	#NAME?	1.37855	2.35637	2.20592	2.51456
ENSMUSG00000006390.15	Elovl1	859.923	0.521604	0.234789	-2.22158	0.0263115	0.352274	1.48096	1.45496	1.62833	2.09803	1.75343	2.01375
ENSMUSG00000032033.11	Barx2	21.2245	1.63877	0.737663	-2.22157	0.0263124	0.352274	0.478449	#NAME?	0.177379	1.00819	0.948261	1.69841
ENSMUSG00000039431.16	Mtmr7	1053.87	-0.479039	0.215605	2.22183	0.0262948	0.352274	1.12619	0.982234	0.460246	0.0201365	0.579196	0.22836
ENSMUSG00000029915.14	Clec5a	19.2409	-2.61361	1.17709	2.2204	0.0263918	0.353021	#NAME?	4.09851	-1.46338	-1.23511	-1.06349	-0.703554
ENSMUSG00000070283.4	Ndufaf3	470.593	0.566248	0.255074	-2.21993	0.0264233	0.353125	1.01713	1.46048	1.91333	1.80542	1.9284	2.19584
ENSMUSG00000036768.6	Kif15	41.6169	2.93839	1.32415	-2.21907	0.0264817	0.353288	#NAME?	#NAME?	-4.57967	-3.37823	-2.13119	-4.0216
ENSMUSG00000035559.9	Mpv17l2	554.716	0.534311	0.240783	-2.21906	0.026483	0.353288	1.44858	1.58317	2.14819	1.82625	2.207	2.47653
ENSMUSG00000071226.11	Cecr2	175.26	-0.803658	0.362286	2.2183	0.0265347	0.353345	-1.15687	-1.59514	-1.75554	-2.47864	-2.0315	-2.70181
ENSMUSG00000090841.2	Myl6	2890.69	0.496436	0.223757	-2.21864	0.0265113	0.353345	0.327126	0.243923	-0.224625	0.817964	0.149893	0.521826
ENSMUSG00000031207.16	Msn	1031.52	0.717906	0.323767	-2.21736	0.0265987	0.353752	-0.517555	-0.612828	-0.122396	0.747618	0.256467	-0.49515
ENSMUSG00000092094.5	Zfp804b	5.53048	-3.34686	1.50953	2.21715	0.0266127	0.353752	5.61148	3.0409	3.30023	-0.241021	0.88912	0.389896
ENSMUSG00000019804.12	Snx3	1722.29	0.341118	0.153912	-2.21632	0.0266696	0.354192	0.623888	0.485211	0.483035	1.03841	0.626654	0.666864
ENSMUSG00000022199.12	Slc22a17	8112.17	0.540728	0.24413	-2.21492	0.0267658	0.354521	1.53398	1.68248	1.91218	1.63222	2.12317	2.763
ENSMUSG00000039050.8	Osbpl2	1038.13	-0.388451	0.175375	2.21497	0.0267622	0.354521	0.112683	0.373396	-0.0230438	-0.398846	-0.109774	-0.462842
ENSMUSG00000043183.18	Simc1	276.785	-0.677228	0.305695	2.21537	0.0267346	0.354521	-0.337999	0.223264	0.476084	-1.06192	-0.0701074	-0.85648
ENSMUSG00000034621.14	Gpatch8	1063.19	-0.405322	0.183417	2.20983	0.0271166	0.358531	-1.36647	-1.59514	-1.96297	-2.23014	-1.96522	-2.25723
ENSMUSG00000027004.3	Frzb	152.655	0.825699	0.373719	-2.20941	0.0271459	0.3586	0.626035	-0.266757	0.436639	0.803411	1.55482	0.890509
ENSMUSG00000001558.5	Klhl10	5.49721	3.40496	1.54154	-2.20881	0.0271876	0.358833	#NAME?	#NAME?	#NAME?	0.0269718	1.44669	-1.37622
ENSMUSG00000032174.5	Icam5	69.9788	1.5949	0.722309	-2.20806	0.02724	0.359207	2.28315	-0.921981	1.72471	1.28386	3.55426	3.64538
ENSMUSG00000056666.13	Retsat	267.863	0.607485	0.27529	-2.20671	0.0273342	0.359812	0.338134	0.912003	0.524015	0.821268	0.962926	1.51572
ENSMUSG00000046876.16	Atxn1	444.211	-0.467297	0.211829	2.20601	0.0273832	0.359821	-1.48164	-1.24976	-1.65221	-2.42604	-1.81368	-1.92351
ENSMUSG00000025880.11	Smad7	229.304	0.609629	0.276436	-2.20532	0.0274315	0.360139	-0.83413	-1.47298	-0.881136	-0.641417	-0.362944	-0.508757
ENSMUSG00000066637.2	Ttc32	53.0333	1.18102	0.536277	-2.20225	0.0276479	0.360552	0.340331	-0.401265	-0.417155	0.995736	0.73548	1.4954
ENSMUSG00000087687.3	Pet100	265.062	0.790583	0.358825	-2.20326	0.0275766	0.360552	2.33014	2.23601	2.67417	3.62033	2.94284	2.86925
ENSMUSG00000026798.10	Coq4	151.433	0.871628	0.395812	-2.20212	0.0276566	0.360552	0.101754	0.269288	0.856234	1.77187	1.21455	0.806435
ENSMUSG00000051319.6	Mtln	285.869	0.914576	0.414898	-2.20434	0.0275005	0.360552	0.198892	0.033641	1.14899	1.7784	0.718841	1.61667
ENSMUSG00000038982.10	Bloc1s5	180.758	0.821704	0.373069	-2.20255	0.0276265	0.360552	-0.650146	-2.02878	-1.0337	-0.152523	-0.769452	-0.206875
ENSMUSG00000021963.17	Sap18	655.785	0.371982	0.168842	-2.20314	0.0275851	0.360552	-1.10228	-1.23209	-1.32792	-0.871219	-1.00639	-0.932531
ENSMUSG00000033751.5	Gadd45gip1	598.261	0.58493	0.265531	-2.20287	0.0276036	0.360552	1.60388	1.61786	2.27619	2.55619	2.02644	2.52919
ENSMUSG00000058258.14	Idi1	262.489	0.811132	0.36825	-2.20267	0.0276183	0.360552	-1.04655	-2.22389	-1.53175	-0.492292	-0.61101	-1.58095
ENSMUSG00000028367.5	Txn1	1200.48	0.449557	0.204198	-2.20157	0.0276958	0.360748	2.15839	1.9511	1.96555	2.4726	2.05261	2.63821
ENSMUSG00000063236.6	1110038F14Rik	169.42	0.634637	0.288466	-2.20004	0.0278039	0.361524	-0.85134	-0.10965	0.0657234	0.429518	0.0540419	0.316538
ENSMUSG00000011884.13	Gltp	707.566	0.528574	0.240232	-2.20027	0.0277881	0.361524	-0.207508	-0.138984	0.400282	0.478216	0.221979	0.715285
ENSMUSG00000034218.16	Atm	459.191	-0.661102	0.300618	2.19914	0.0278678	0.361723	-0.539639	-0.0913208	-0.500005	-0.899795	-1.11475	-1.27684
ENSMUSG00000055333.14	Fat2	15363.5	-0.499334	0.227045	2.19927	0.0278585	0.361723	0.489234	0.548326	0.626318	0.0248156	-0.238012	0.0472326
ENSMUSG00000037846.18	Rtkn2	42.1129	1.8513	0.842224	-2.19811	0.027941	0.362357	-0.138414	-1.63166	-0.112074	1.96133	1.58084	-1.32769
ENSMUSG00000048481.15	Mypop	165.706	0.637159	0.289951	-2.19747	0.0279868	0.362552	-0.782891	-0.0396372	-0.537466	0.0745346	-0.223718	0.450681
ENSMUSG00000036412.5	Arsi	17.3923	2.07027	0.942223	-2.19722	0.0280046	0.362552	-1.70762	-0.666228	-1.72012	0.198585	1.17416	0.0343108
ENSMUSG00000026003.5	Acadl	826.92	0.590424	0.268965	-2.19517	0.0281515	0.363481	0.377021	0.122685	0.732428	1.19681	0.687424	0.868864
ENSMUSG00000026048.16	Ercc5	369.328	-0.427242	0.194717	2.19418	0.0282228	0.363481	-0.473998	-0.398353	-0.87623	-1.12557	-1.16147	-1.02368
ENSMUSG00000038836.15	Agbl3	145.637	-0.936751	0.426919	2.19421	0.0282202	0.363481	0.112127	-0.185794	-1.83156	-2.22814	-1.54394	-1.16622
ENSMUSG00000051518.8	Rps19bp1	194.691	0.859887	0.391649	-2.19556	0.0281237	0.363481	0.159378	0.188869	0.760973	1.60956	1.28049	0.772524
ENSMUSG00000024240.13	Epc1	689.837	-0.400211	0.182434	2.19373	0.0282546	0.363577	-0.805315	-0.79203	-1.00455	-1.32517	-1.30131	-1.43467
ENSMUSG00000028430.14	Nol6	1604.1	-0.419473	0.191281	2.19297	0.0283094	0.363654	0.609722	0.843441	1.16199	0.055917	0.547215	0.477498
ENSMUSG00000066720.7	Cldn9	6.62048	3.56042	1.6242	-2.1921	0.0283721	0.364146	#NAME?	#NAME?	-1.86221	0.35637	#NAME?	2.25344
ENSMUSG00000020490.16	Btnl10	3.34042	-4.34311	1.98164	2.19167	0.028403	0.364229	2.30634	5.1492	4.52704	#NAME?	#NAME?	1.1767
ENSMUSG00000003072.15	Atp5d	4395.05	0.334505	0.152718	-2.19035	0.0284992	0.365	2.24561	2.22528	2.28994	2.4389	2.49603	2.55174
ENSMUSG00000050919.9	Zfp366	136.795	1.20165	0.548743	-2.18983	0.0285367	0.365	-1.48257	-2.06872	-0.0828131	0.922532	-0.143842	-0.865737
ENSMUSG00000034243.17	Golgb1	1711.8	-0.319704	0.145988	2.18994	0.0285288	0.365	-0.110254	-0.386008	-0.373374	-0.794009	-0.486548	-0.839174
ENSMUSG00000028173.10	Wls	1775.75	0.428657	0.195809	-2.18916	0.0285851	0.365305	0.863882	0.911084	1.06817	1.47508	1.09076	1.22943
ENSMUSG00000064267.13	Hvcn1	13.997	2.78556	1.27309	-2.18803	0.0286676	0.365391	#NAME?	#NAME?	-0.332308	1.48579	0.463853	0.809999
ENSMUSG00000051413.17	Plagl2	103.539	2.04878	0.936646	-2.18736	0.0287166	0.365391	-3.83377	#NAME?	#NAME?	-3.69516	-3.76836	-3.63626
ENSMUSG00000040464.15	Gtpbp10	149.355	-0.870796	0.398186	2.18691	0.0287491	0.365391	-1.18846	-0.318307	-1.86095	-1.75643	-1.75962	-2.37304
ENSMUSG00000060012.9	Kif13b	619.58	-0.463216	0.211747	2.18759	0.0286996	0.365391	-0.749239	-0.630309	-1.2318	-1.43022	-1.55298	-1.22365
ENSMUSG00000032336.17	Nptn	14589.2	0.227854	0.104144	-2.18787	0.0286787	0.365391	1.17316	1.15158	1.00923	1.19676	1.40432	1.1308
ENSMUSG00000042249.11	Grk3	1045.19	-0.479974	0.219398	2.18769	0.0286923	0.365391	-2.34214	-2.49567	-2.79513	-3.65255	-3.15996	-2.60949
ENSMUSG00000040681.16	Hmgn1	580.45	0.695035	0.317845	-2.18671	0.0287634	0.365391	-1.62795	-1.78085	-2.49678	-1.39116	-1.95901	-0.881637
ENSMUSG00000004328.15	Hif3a	93.356	1.29791	0.593861	-2.18554	0.028849	0.366166	-1.39285	-1.52643	-1.48044	-0.798464	0.140407	-0.26697
ENSMUSG00000064264.14	Zfp428	219.963	1.10058	0.503742	-2.1848	0.0289033	0.366203	1.26037	-0.552855	1.45439	2.25238	1.90987	1.67937
ENSMUSG00000032252.14	Glce	1045.19	-0.443728	0.203115	2.18461	0.0289171	0.366203	-0.644394	-0.774239	-1.25733	-1.39552	-1.36024	-1.4703
ENSMUSG00000000753.15	Serpinf1	724.387	0.543137	0.248637	-2.18446	0.0289283	0.366203	1.46255	1.65928	1.80427	2.26917	2.04096	2.04932
ENSMUSG00000038387.9	Rras	170.875	0.63663	0.291579	-2.18339	0.0290071	0.3663	0.929607	1.42424	1.33534	1.66408	2.10941	1.63135
ENSMUSG00000002881.14	Nab1	519.599	-0.643915	0.295099	2.18203	0.0291074	0.366946	-0.668011	-1.23995	-1.07547	-1.74651	-1.67227	-1.75516
ENSMUSG00000014361.5	Mertk	482.245	0.820914	0.376164	-2.18233	0.0290851	0.366946	0.793369	0.084023	1.36103	1.42079	1.05258	1.76274
ENSMUSG00000025762.15	Larp1b	211.883	0.547273	0.250984	-2.18051	0.0292198	0.367315	-1.77762	-1.11528	-1.09215	-0.86144	-0.724865	-0.974016
ENSMUSG00000053641.9	Dennd4a	1385.51	-0.509969	0.233875	2.18052	0.0292189	0.367315	-0.381945	-0.514886	-0.869104	-1.25872	-1.07506	-1.19655
ENSMUSG00000063410.8	Stk24	650.833	-0.412731	0.1893	2.1803	0.0292353	0.367315	0.686817	0.882272	0.362112	0.0853323	0.223951	0.116706
ENSMUSG00000001029.15	Icam2	186.076	0.697908	0.320254	-2.17924	0.0293142	0.367995	1.9238	2.4452	2.06648	3.05254	2.75721	2.28628
ENSMUSG00000062209.15	Erbb4	998.072	-0.598137	0.274557	2.17855	0.0293648	0.36832	-0.548428	-0.284276	-1.22694	-1.44106	-1.25341	-1.31627
ENSMUSG00000023755.10	Rhebl1	110.463	-0.934936	0.429478	2.17691	0.0294872	0.368875	0.0759584	-0.562928	-1.88843	-2.26434	-1.79465	-1.22854
ENSMUSG00000027865.10	Gdap2	549.018	-0.490576	0.225383	2.17663	0.029508	0.368875	0.23364	0.528955	0.00828307	-0.275456	-0.339114	-0.304427
ENSMUSG00000025616.14	Usp16	553.214	-0.534397	0.245443	2.17728	0.02946	0.368875	-1.25296	-1.02511	-1.99852	-1.70142	-2.22587	-2.21571
ENSMUSG00000029185.14	Fam114a1	68.2696	1.05428	0.484192	-2.1774	0.0294507	0.368875	-1.45235	-1.4097	-0.404439	-0.208787	-0.318249	0.410741
ENSMUSG00000046138.15	9930021J03Rik	675.19	-0.600909	0.27634	2.17453	0.0296656	0.370223	-2.34873	-2.46472	-2.98478	-3.44866	-3.03212	-3.34282
ENSMUSG00000028456.18	Unc13b	386.599	-0.671977	0.308991	2.17475	0.0296491	0.370223	-0.537911	-1.23608	-1.44001	-1.71243	-1.94981	-1.64637
ENSMUSG00000005804.14	Bloc1s6	293.71	-0.599818	0.275906	2.174	0.0297055	0.370411	0.502214	0.488889	-0.53884	-0.709572	-0.497806	-0.442383
ENSMUSG00000041235.12	Chd7	2216.13	-0.787012	0.362127	2.1733	0.0297575	0.370721	-0.96258	-1.71239	-2.0266	-2.61246	-2.27341	-2.27866
ENSMUSG00000021248.9	Tmed10	1271.5	0.500615	0.230491	-2.17195	0.0298595	0.37109	-1.74131	-1.88857	-2.00362	-1.17802	-1.77791	-1.50575
ENSMUSG00000022223.9	Sdr39u1	475.103	-0.355406	0.16367	2.17149	0.0298945	0.371215	1.5553	1.63415	1.52945	1.05544	1.29366	0.992716
ENSMUSG00000031760.9	Mt3	4031.71	0.889863	0.409865	-2.17111	0.0299228	0.371256	2.69428	3.17078	2.11918	2.91692	2.9027	4.28931
ENSMUSG00000096351.2	Samd11	14.0958	-1.89896	0.874835	2.17065	0.0299578	0.371382	0.602313	2.19837	#NAME?	-1.63468	-0.63368	-0.726341
ENSMUSG00000006567.11	Atp7b	62.7895	-0.926088	0.426966	2.169	0.030083	0.371697	0.358345	-0.507949	0.456788	-0.847817	-0.496807	-1.31248
ENSMUSG00000054580.14	Pla2r1	32.318	1.29578	0.597306	-2.16938	0.0300542	0.371697	0.1552	-2.8189	-0.255937	0.844441	0.987678	0.568121
ENSMUSG00000109372.1	Gm19410	12.9682	2.45076	1.12969	-2.1694	0.0300522	0.371697	#NAME?	-0.466719	1.53971	1.52091	3.15966	1.13245
ENSMUSG00000071103.9	1700029J07Rik	40.1757	-1.48235	0.683654	2.16827	0.0301382	0.371763	-2.01502	-0.945085	-2.44435	-2.42203	-4.33285	-3.70032
ENSMUSG00000042364.11	Snx18	458.938	0.412931	0.190418	-2.16855	0.0301165	0.371763	-0.984797	-0.935092	-0.671818	-0.615611	-0.478488	-0.509339
ENSMUSG00000058704.9	Memo1	301.606	0.554425	0.255811	-2.16732	0.0302104	0.372038	-0.355678	-0.719512	-0.0503833	-0.0937402	0.419498	0.004914
ENSMUSG00000052812.5	Atad2b	558.717	-0.735081	0.339154	2.16739	0.0302048	0.372038	-1.85436	-1.74538	-2.05003	-1.93978	-2.97841	-3.49716
ENSMUSG00000002580.7	Mien1	469.813	0.479282	0.221222	-2.16652	0.0302712	0.372479	1.63549	1.61491	1.35109	1.95394	1.5343	2.23236
ENSMUSG00000001025.8	S100a6	260.081	0.919992	0.424747	-2.16598	0.0303128	0.372683	1.04568	1.45419	1.97763	2.15674	2.21708	2.97188
ENSMUSG00000023030.16	Slc11a2	665.936	-0.447807	0.206801	2.1654	0.0303572	0.372921	0.171331	0.518129	-0.073959	-0.606302	-0.386312	0.02385
ENSMUSG00000026023.16	Cdk15	7.69118	-3.13943	1.45016	2.16488	0.0303965	0.372977	6.9334	2.28321	0.887444	-1.96574	-0.595231	0.591735
ENSMUSG00000025508.13	Rplp2	1284.41	0.472437	0.21829	-2.16427	0.030444	0.372977	0.721013	1.05552	0.510246	0.968643	0.817955	1.59245
ENSMUSG00000053161.16	Daw1	11.2367	-2.43392	1.12471	2.16403	0.0304619	0.372977	-1.02593	2.34064	0.811873	-1.13322	#NAME?	-0.417068
ENSMUSG00000031903.7	Pla2g15	273.67	0.465161	0.214949	-2.16406	0.0304601	0.372977	0.84834	0.364709	0.825564	0.91997	1.02627	1.27196
ENSMUSG00000072494.7	Ppp1r3e	103.494	1.11524	0.515632	-2.16286	0.0305516	0.373461	-1.76763	-2.55574	-1.50627	-1.78551	-1.04507	-0.0700097
ENSMUSG00000067288.13	Rps28	415.904	0.49347	0.228249	-2.16198	0.0306198	0.373989	0.754822	1.18078	0.94485	1.40848	0.935715	1.72355
ENSMUSG00000056342.16	Usp34	2705.93	-0.569126	0.263415	2.16056	0.030729	0.374156	-0.378043	-0.811591	-0.854879	-1.63765	-1.13157	-1.26027
ENSMUSG00000058740.14	Kcnt1	2276.54	-0.630369	0.29177	2.1605	0.030734	0.374156	-1.21697	-0.479257	-1.6017	-2.26992	-1.72446	-1.38392
ENSMUSG00000028849.17	Map7d1	2765.51	0.3202	0.148168	-2.16106	0.0306911	0.374156	-0.409214	-0.244584	-0.198069	-0.166947	0.00585848	0.00908694
ENSMUSG00000072949.6	Acot1	102.939	0.7468	0.345628	-2.1607	0.0307182	0.374156	-0.647881	-0.45949	0.368043	0.436346	0.499072	0.494389
ENSMUSG00000051136.1	Ghsr	5.13891	-4.0491	1.87576	2.15864	0.0308778	0.375294	#NAME?	4.73789	5.52704	#NAME?	2.11151	1.73031
ENSMUSG00000027498.14	Cstf1	444.893	-0.423795	0.196306	2.15884	0.0308623	0.375294	0.922704	0.86736	0.621114	0.583822	0.240527	0.0275797
ENSMUSG00000020790.14	Ankfy1	949.254	-0.326709	0.151416	2.15769	0.0309522	0.375892	-0.434904	-0.360806	-0.708143	-1.05277	-0.876564	-0.834415
ENSMUSG00000026238.14	Ptma	1839.75	0.806792	0.374133	-2.15643	0.0310501	0.376308	-1.87409	-2.67661	-2.23539	-0.953967	-2.05401	-1.73133
ENSMUSG00000005362.14	Crbn	1367.49	-0.372049	0.17254	2.1563	0.0310605	0.376308	0.506221	0.839082	0.672656	0.40871	0.253483	-0.0357426
ENSMUSG00000023938.8	Aars2	442.475	-0.401835	0.186356	2.15627	0.0310623	0.376308	-0.286572	-0.326824	-0.390613	-0.773153	-1.13221	-0.580003
ENSMUSG00000059005.13	Hnrnpa3	2373.35	0.673768	0.312617	-2.15525	0.0311425	0.376974	-2.82892	-3.21126	-2.769	-1.83709	-2.34514	-2.98678
ENSMUSG00000052798.13	Nup107	275.734	0.472354	0.219409	-2.15285	0.0313304	0.378633	-0.107534	-0.25564	-0.232856	0.224126	0.306083	0.0388309
ENSMUSG00000078451.5	Ppil6	45.3996	1.17601	0.546547	-2.15171	0.0314201	0.378973	-0.000910478	-0.204988	-0.711033	-0.555599	1.17298	1.30447
ENSMUSG00000027419.9	Pcsk2	1837.43	-0.458963	0.213352	2.1512	0.0314603	0.378973	1.23886	1.33408	0.583755	0.177524	0.549357	0.789848
ENSMUSG00000041361.13	Myzap	18.539	1.90905	0.88736	-2.15139	0.0314457	0.378973	-1.46569	#NAME?	-1.24891	-0.0394562	0.258109	-0.544355
ENSMUSG00000017478.15	Zc3h18	560.117	-0.419551	0.19502	2.15133	0.0314505	0.378973	-0.787247	-0.253041	-0.655939	-0.854188	-1.12771	-1.20858
ENSMUSG00000029012.11	Orc5	444.511	-0.478515	0.222542	2.15022	0.0315375	0.378984	0.771924	0.389619	0.703634	0.2215	0.26986	-0.388198
ENSMUSG00000042254.14	Cilp	4.40144	3.49295	1.62441	-2.15029	0.0315323	0.378984	#NAME?	#NAME?	#NAME?	1.73559	1.28584	1.19263
ENSMUSG00000024164.15	C3	20.4463	-1.67879	0.780571	2.15073	0.0314979	0.378984	1.60659	0.987566	1.37855	0.215199	-0.359816	-0.667704
ENSMUSG00000079429.9	Mroh2a	55.7808	-2.06975	0.962881	2.14954	0.0315916	0.379329	-4.55984	-1.83936	-4.72174	#NAME?	-4.20061	-5.81887
ENSMUSG00000054659.13	Pm20d2	102.46	-0.767588	0.357226	2.14875	0.0316546	0.379779	1.06339	1.30542	1.87839	0.344916	0.64443	0.568826
ENSMUSG00000023886.10	Smoc2	62.5072	0.915902	0.426543	-2.14727	0.031772	0.380574	0.265282	0.633467	0.868007	1.70594	0.796492	1.6749
ENSMUSG00000023089.12	Ndufa5	1641.61	0.489147	0.227865	-2.14665	0.0318212	0.380858	2.84666	2.38211	2.01728	3.02001	2.55959	2.84515
ENSMUSG00000026222.16	Sp100	68.77	1.07146	0.499246	-2.14616	0.0318601	0.381017	-1.11863	-1.54568	-0.417155	0.103334	0.370731	-0.836943
ENSMUSG00000026928.14	Card9	35.2534	1.5207	0.709286	-2.14399	0.0320336	0.381067	-0.906742	-2.95013	-0.794465	-0.536	0.807981	0.144708
ENSMUSG00000058248.12	Kcnh1	621.453	-0.736029	0.3433	2.14399	0.032034	0.381067	-1.05811	-0.547337	-0.372789	-1.39671	-1.58552	-1.44797
ENSMUSG00000020794.13	Ube2g1	1159.1	0.379407	0.177057	-2.14284	0.0321256	0.381067	-0.588804	-0.5331	-0.436039	-0.213009	-0.0401666	-0.440592
ENSMUSG00000079426.13	Arpc4	2062.27	0.388667	0.181214	-2.14479	0.0319694	0.381067	1.19302	1.75818	1.73167	1.75282	1.84231	2.0129
ENSMUSG00000001103.7	Sebox	125.969	0.773517	0.360885	-2.14339	0.0320819	0.381067	-1.99688	-1.29997	-2.05962	-0.88883	-1.18217	-1.16053
ENSMUSG00000027957.13	Slc35a3	344.659	-0.588178	0.274177	2.14525	0.0319327	0.381067	-2.00821	-1.45335	-1.84212	-2.57548	-2.58478	-2.18986
ENSMUSG00000055660.9	Mettl4	290.895	0.739818	0.345391	-2.14197	0.0321955	0.381067	-3.06564	-3.21116	-2.0632	-1.59314	-2.25655	-2.24593
ENSMUSG00000026918.16	Brd3	789.775	-0.425821	0.198579	2.14434	0.0320053	0.381067	-0.430767	-1.04011	-0.839356	-1.36952	-1.15407	-1.30083
ENSMUSG00000069892.9	9930111J21Rik2	17.6242	2.90036	1.35414	-2.14184	0.0322065	0.381067	#NAME?	#NAME?	#NAME?	-2.98249	-1.19368	-2.15553
ENSMUSG00000000263.15	Glra1	101.995	-1.81659	0.848088	2.14198	0.0321952	0.381067	6.49198	5.81076	2.74153	2.3994	2.48251	2.93724
ENSMUSG00000021607.9	Mrpl36	373.357	0.596196	0.278015	-2.14448	0.0319947	0.381067	0.581025	1.17362	1.62362	1.67814	1.66984	1.59775
ENSMUSG00000032796.8	Lama1	191.944	0.681475	0.318115	-2.14222	0.0321754	0.381067	1.33233	0.753736	0.837317	2.22273	1.20939	1.22023
ENSMUSG00000036968.15	Cnpy4	208.851	0.588877	0.274729	-2.14349	0.032074	0.381067	-0.262868	-0.317097	0.263671	0.834465	0.185519	0.195917
ENSMUSG00000036304.14	Zdhhc23	76.9169	-1.33992	0.625752	2.1413	0.0322501	0.381094	-1.68453	-0.424247	-3.14114	-2.44982	-2.31941	-5.7104
ENSMUSG00000043668.13	Tox3	56.9318	-1.44265	0.674	2.14043	0.0323197	0.381311	2.79355	2.68422	1.84589	-0.230934	1.38535	1.38251
ENSMUSG00000074570.14	Cass4	33.2603	2.87524	1.34323	-2.14054	0.0323114	0.381311	#NAME?	#NAME?	#NAME?	-0.407377	-0.12689	0.410854
ENSMUSG00000038612.16	Mcl1	1388.24	0.533055	0.249154	-2.13947	0.032398	0.381329	-1.2095	-1.10122	-0.558055	-0.198431	-0.535667	-0.725098
ENSMUSG00000048368.9	Omd	101.585	0.925974	0.432779	-2.1396	0.0323872	0.381329	0.550265	0.517353	-0.202347	1.69744	0.634198	1.04796
ENSMUSG00000019971.10	Cep290	349.787	-0.563309	0.263247	2.13985	0.0323673	0.381329	-0.980227	-0.577038	-1.28382	-1.25474	-1.50953	-1.98396
ENSMUSG00000026924.17	Sec16a	1512.45	-0.421179	0.196905	2.13899	0.0324361	0.381449	0.305645	0.202242	0.43476	-0.357896	-0.220648	-0.0699269
ENSMUSG00000028284.13	Map3k7	913.732	-0.437844	0.204724	2.13871	0.0324594	0.381449	-1.36668	-1.04963	-1.76517	-2.03805	-2.02357	-1.6812
ENSMUSG00000064127.13	Med14	1234.05	-0.322786	0.150995	2.13773	0.0325391	0.381483	0.515061	0.288462	0.194136	-0.151646	-0.0466506	-0.0543204
ENSMUSG00000021395.11	Spin1	1330.99	-0.635807	0.297398	2.1379	0.0325248	0.381483	-1.13003	-0.718313	-1.65211	-2.12644	-1.63844	-1.78885
ENSMUSG00000027652.15	Ralgapb	2125.2	-0.301644	0.141083	2.13805	0.0325125	0.381483	-0.518875	-0.519496	-0.685213	-1.05269	-0.959825	-0.898647
ENSMUSG00000032612.14	Usp4	1384.89	-0.419256	0.196163	2.13729	0.0325743	0.381596	-0.262137	0.320841	-0.340295	-0.760132	-0.565714	-0.431726
ENSMUSG00000035305.5	Ror1	75.5821	1.04349	0.488569	-2.13581	0.0326952	0.382111	-1.18131	-0.896057	-0.956101	-0.118499	-1.14498	0.76163
ENSMUSG00000074247.10	Dda1	644.603	0.384729	0.18013	-2.13584	0.0326924	0.382111	-0.774555	-0.847532	-0.668928	-0.766556	-0.369299	-0.276139
ENSMUSG00000038861.14	Pi4kb	875.864	-0.496262	0.232322	2.1361	0.0326717	0.382111	0.692754	0.924179	0.892389	-0.0967586	0.1153	0.669694
ENSMUSG00000042506.15	Usp22	3571.85	-0.328126	0.153767	2.13392	0.0328491	0.38241	0.396976	0.716502	0.574859	0.0907173	0.324472	0.0114072
ENSMUSG00000014905.4	Dnajb9	760.893	0.426103	0.19962	-2.13457	0.0327959	0.38241	0.265045	0.259499	-0.0491457	0.823204	0.316558	0.278399
ENSMUSG00000042606.9	Hirip3	237.157	-0.526588	0.246728	2.13429	0.0328192	0.38241	-0.342507	-0.222309	-0.445273	-0.659484	-1.15199	-1.08871
ENSMUSG00000042349.13	Ikbke	22.6541	3.03482	1.42212	-2.13401	0.0328416	0.38241	-3.62024	#NAME?	#NAME?	-2.74446	-2.02866	-0.907995
ENSMUSG00000022696.17	Sidt1	437.004	0.537761	0.251989	-2.13407	0.0328374	0.38241	-0.126353	0.220347	-0.558553	-0.00696921	0.0850525	0.74959
ENSMUSG00000038524.13	Fchsd1	59.4416	1.0928	0.512261	-2.13329	0.032901	0.382715	-1.762	#NAME?	-1.53313	-1.14262	-0.991665	-1.09009
ENSMUSG00000034023.16	Fancd2	12.6036	-2.27129	1.06554	2.13158	0.0330415	0.383451	-0.81613	0.59335	0.614658	-1.51842	#NAME?	-1.96569
ENSMUSG00000022838.14	Eaf2	9.35786	2.93746	1.37788	-2.13187	0.0330172	0.383451	#NAME?	#NAME?	-1.421	0.0747329	-0.074228	0.039409
ENSMUSG00000079111.3	Kdelr2	843.779	0.379475	0.178024	-2.1316	0.03304	0.383451	1.6866	1.92143	1.85224	2.1919	1.88565	2.25456
ENSMUSG00000066595.9	Flvcr1	286.531	-0.605867	0.284349	2.13072	0.0331126	0.383876	-0.387192	0.240247	-0.865371	-1.38657	-0.872434	-0.865671
ENSMUSG00000023330.12	Dtwd1	93.987	-0.692831	0.325243	2.1302	0.0331554	0.383876	1.56792	0.793104	0.895558	0.419964	0.558299	-0.0115409
ENSMUSG00000027230.9	Creb3l1	132.939	1.03923	0.487806	-2.13041	0.0331377	0.383876	0.0684553	-0.262682	0.842849	0.369407	0.914693	1.79261
ENSMUSG00000031130.3	Brs3	2.1998	-5.71376	2.68346	2.12925	0.0332337	0.3844	3.04049	#NAME?	6.112	#NAME?	-0.815567	4.10025
ENSMUSG00000053870.7	Fpgt	407.545	-0.527476	0.247755	2.12902	0.0332523	0.3844	-0.269694	0.0178539	-0.971181	-0.882076	-1.04941	-1.16251
ENSMUSG00000032180.11	Tmed1	166.072	0.68056	0.319806	-2.12804	0.0333335	0.38504	0.0645624	0.379221	0.785134	0.871097	0.477111	1.59813
ENSMUSG00000020052.9	Ascl1	30.302	1.53936	0.723561	-2.12748	0.0333803	0.385283	-1.899	-2.35474	0.15999	0.726079	1.34654	0.253314
ENSMUSG00000000346.9	Dazap2	1764.43	0.403799	0.189857	-2.12685	0.0334324	0.385287	-0.628615	-0.408353	-0.507771	-0.591895	-0.235076	0.206468
ENSMUSG00000003198.10	Zfp959	125.085	-0.746246	0.350867	2.12686	0.0334313	0.385287	-1.34211	-0.521073	-1.6736	-1.72599	-2.34877	-1.79902
ENSMUSG00000075478.3	Slitrk1	1337.11	0.31699	0.149152	-2.12529	0.0335628	0.386491	0.816211	0.404582	0.654261	0.808951	0.927223	0.826244
ENSMUSG00000003549.9	Ercc1	227.526	0.545881	0.257041	-2.12371	0.033694	0.387702	-0.127154	-0.0462121	0.360495	0.600405	0.351931	0.726562
ENSMUSG00000026209.15	Dnpep	727.788	-0.440033	0.207348	2.1222	0.0338208	0.388861	1.08835	1.87123	1.17489	0.799096	0.788244	1.01297
ENSMUSG00000019789.9	Hey2	82.2779	0.781337	0.368279	-2.12159	0.0338723	0.388959	-0.166291	-0.111776	-0.611101	0.537677	0.483348	0.119907
ENSMUSG00000006586.15	Runx1t1	443.449	-0.593681	0.279966	2.12055	0.0339599	0.388959	0.166786	0.255254	-0.30384	-0.517275	-0.441036	-0.89465
ENSMUSG00000061601.15	Pclo	6176.4	-0.417437	0.196853	2.12055	0.0339593	0.388959	0.156542	-0.0634837	-0.0700858	-0.488589	-0.303587	-0.701635
ENSMUSG00000060923.5	Acyp2	490.535	0.476451	0.224626	-2.12109	0.0339146	0.388959	1.87866	1.94781	1.64785	2.32268	2.285	1.94946
ENSMUSG00000020647.10	Ncoa1	2332.01	-0.472252	0.222767	2.11994	0.0340111	0.389023	0.272498	-0.217991	0.322386	-0.328519	-0.21128	-0.777256
ENSMUSG00000040123.17	Zmym5	642.146	-0.63047	0.297411	2.11986	0.0340177	0.389023	-1.82417	-0.925115	-1.52591	-1.82173	-2.01594	-2.62022
ENSMUSG00000022982.10	Sod1	1802.69	0.43945	0.207481	-2.11802	0.034173	0.3905	1.03602	0.761553	0.874014	1.315	1.07918	1.33381
ENSMUSG00000036698.11	Ago2	1567	-0.512494	0.242004	2.11771	0.0341995	0.390503	-1.43589	-1.64681	-1.49845	-2.29035	-2.30519	-1.88402
ENSMUSG00000049625.6	Tifab	12.1772	3.08494	1.45699	-2.11735	0.0342305	0.390557	#NAME?	#NAME?	#NAME?	-2.16269	-1.15713	-0.448036
ENSMUSG00000002808.7	Epdr1	1706.77	0.414738	0.195947	-2.11658	0.0342952	0.390719	0.265305	0.661802	0.343365	0.7776	0.511726	0.954418
ENSMUSG00000022894.6	Adamts5	60.0238	1.1138	0.526232	-2.11655	0.0342982	0.390719	-0.672996	#NAME?	-2.60828	-1.03342	-1.18881	-0.7436
ENSMUSG00000033306.15	Lpp	382.444	0.637703	0.301336	-2.11625	0.0343233	0.390719	-1.96979	-3.16009	-1.67951	-1.62686	-1.64643	-1.70115
ENSMUSG00000000384.15	Tbrg4	477.732	-0.441888	0.208999	2.11431	0.0344886	0.391405	0.54932	0.0901203	-0.00544536	-0.502452	-0.296552	-0.156385
ENSMUSG00000020432.12	Tcn2	706.328	0.682254	0.322677	-2.11435	0.0344851	0.391405	1.42821	1.76603	1.24336	2.18043	1.38643	2.56724
ENSMUSG00000049047.11	Armcx3	369.522	0.874881	0.41365	-2.11503	0.0344276	0.391405	-5.07113	-4.7054	-4.95042	-4.20376	-4.23222	-3.92253
ENSMUSG00000025509.15	Pnpla2	472.182	0.613012	0.290025	-2.11365	0.034545	0.391747	1.07886	1.03742	1.10306	1.07327	1.41563	2.14551
ENSMUSG00000032690.16	Oas2	12.5618	-2.84704	1.34798	2.11208	0.0346797	0.392975	-0.901638	#NAME?	0.00143253	-3.32723	-3.9141	#NAME?
ENSMUSG00000022394.14	L3mbtl2	381.231	-0.425884	0.201688	2.1116	0.034721	0.393144	-0.400437	-0.00936759	-0.626564	-1.1411	-0.743155	-0.696982
ENSMUSG00000032679.12	Cd59a	169.72	1.02583	0.485945	-2.11099	0.0347731	0.393365	0.0583733	0.0319551	0.737159	1.13727	0.658013	1.86803
ENSMUSG00000029179.14	Zcchc4	172.947	-0.611308	0.289616	2.11076	0.0347933	0.393365	-0.404123	-0.248415	-1.02211	-0.957186	-1.4157	-1.44009
ENSMUSG00000042453.14	Reln	6360.82	-0.332913	0.157783	2.10994	0.0348638	0.393565	0.919398	0.79243	0.784922	0.422018	0.517119	0.287008
ENSMUSG00000021186.9	Fbln5	499.275	-0.957132	0.453608	2.11004	0.0348545	0.393565	2.5195	2.52844	0.939555	1.34695	0.34967	1.18639
ENSMUSG00000055850.12	Rnf181	655.357	0.4615	0.21877	-2.10952	0.0348995	0.39367	-0.557181	-0.442577	-0.127436	-0.252473	-0.0252831	0.311024
ENSMUSG00000040548.16	Tex2	999.971	-0.378678	0.179587	2.1086	0.0349787	0.394265	-0.97513	-1.37399	-1.51166	-1.80489	-1.82722	-1.61233
ENSMUSG00000045757.6	Zfp764	34.3501	-1.92313	0.912919	2.10658	0.0351544	0.395465	-1.67437	-3.89682	-1.79628	-2.63008	#NAME?	-4.48107
ENSMUSG00000041130.10	Zfp598	705.102	-0.454145	0.215645	2.10598	0.0352059	0.395628	-0.570914	-0.499278	-1.18989	-1.58864	-1.39601	-0.950526
ENSMUSG00000049659.15	Aftph	1444.01	-0.400261	0.190254	2.10382	0.0353938	0.395948	-0.490193	-0.345575	-0.966661	-1.05312	-0.958912	-1.2232
ENSMUSG00000026193.15	Fn1	2504.89	0.783275	0.372292	-2.10392	0.035385	0.395948	0.552671	0.396864	0.937186	1.9736	1.2699	0.392758
ENSMUSG00000024068.8	Spast	969.89	-0.44305	0.210585	2.1039	0.0353874	0.395948	-1.18591	-0.923944	-1.75988	-1.64515	-1.79923	-1.96981
ENSMUSG00000055817.18	Mta3	841.193	-0.419267	0.199275	2.10396	0.0353816	0.395948	0.91575	0.384576	0.716627	0.127746	0.341834	-0.00373925
ENSMUSG00000025538.15	Sumf2	196.631	0.728951	0.346423	-2.10422	0.035359	0.395948	0.411204	0.28264	0.368626	1.08398	0.264806	1.45726
ENSMUSG00000022848.8	Slc49a4	1499.08	0.507814	0.241327	-2.10425	0.0353564	0.395948	0.603896	0.494929	0.919066	0.705558	1.17381	1.39596
ENSMUSG00000022587.14	Ly6e	2369.08	0.506402	0.240863	-2.10245	0.0355139	0.3964	0.766707	0.87886	1.37504	1.53461	1.55511	1.27438
ENSMUSG00000086965.1	Rtl10	48.1782	-0.967049	0.459901	2.10273	0.035489	0.3964	2.54478	1.86495	1.8225	0.695004	1.21417	0.956543
ENSMUSG00000040524.9	Zfp609	815.742	-0.549038	0.261126	2.10258	0.0355027	0.3964	-1.10681	-1.53439	-1.59445	-2.10448	-1.99823	-2.00468
ENSMUSG00000022141.7	Nipbl	1604.74	-0.503821	0.239751	2.10144	0.0356027	0.397093	-0.82498	-1.00865	-1.37666	-1.43067	-1.56103	-1.92997
ENSMUSG00000034522.10	Zfp395	353.36	-0.591634	0.281598	2.10099	0.0356422	0.397236	-0.481391	-0.0178523	-0.186817	-1.08718	-0.844275	-0.76722
ENSMUSG00000026568.6	Mpc2	1428.33	0.340122	0.161964	-2.09998	0.0357305	0.397391	1.7456	1.79825	1.45201	1.9849	2.01622	1.71785
ENSMUSG00000046201.9	Scaf8	1032.55	-0.435694	0.207563	2.09909	0.0358089	0.397391	-0.153037	-0.0636835	-0.192897	-0.390617	-0.802732	-0.833401
ENSMUSG00000031921.17	Terf2	477.66	-0.402269	0.191539	2.1002	0.0357116	0.397391	-0.0603875	-0.211135	-0.336709	-0.528178	-0.610447	-1.00793
ENSMUSG00000025876.15	Unc5a	326.679	-0.539672	0.257108	2.09901	0.0358161	0.397391	0.12932	0.288154	-0.0919973	-1.03942	-0.341145	-0.248337
ENSMUSG00000064246.10	Chil1	149.472	-0.940968	0.448153	2.09966	0.0357589	0.397391	1.65406	1.90298	0.550149	0.122278	0.265557	0.702261
ENSMUSG00000033152.13	Podxl2	2318.96	0.523863	0.249551	-2.09922	0.0357972	0.397391	1.26734	1.13045	1.09962	1.00244	1.58775	2.104
ENSMUSG00000005621.11	Zfp592	648.755	-0.407425	0.194407	2.09573	0.0361063	0.397731	-0.896246	-0.669795	-0.775629	-1.36989	-1.17725	-1.30523
ENSMUSG00000053825.15	Ppfia2	1211	-0.377465	0.180015	2.09686	0.0360064	0.397731	-0.665862	-0.83436	-1.14505	-1.27528	-1.24318	-1.50709
ENSMUSG00000024843.15	Chka	1160.34	0.438798	0.209299	-2.09651	0.0360369	0.397731	-0.934325	-1.25282	-0.642821	-0.515856	-0.725617	-0.453798
ENSMUSG00000023484.14	Prph	15.5219	-2.17285	1.03647	2.0964	0.0360468	0.397731	2.30915	2.97631	2.94331	0.215466	0.427828	1.28238
ENSMUSG00000021918.10	Nek4	300.446	-0.447784	0.213774	2.09466	0.0362012	0.397731	-0.22808	-0.329955	-0.56316	-0.764115	-0.90459	-1.09773
ENSMUSG00000004446.12	Bid	71.6587	-0.843029	0.402623	2.09384	0.0362738	0.397731	0.794046	1.33009	0.634905	-0.708465	0.156013	0.255714
ENSMUSG00000028565.18	Nfia	1899.61	-0.583369	0.278498	2.0947	0.0361977	0.397731	-0.186207	0.392094	-0.367047	-0.601738	-0.917626	-0.56035
ENSMUSG00000025370.7	Cdh9	75.1862	-1.00738	0.480928	2.09465	0.0362019	0.397731	2.54779	2.1175	1.91204	0.210486	1.84745	0.910811
ENSMUSG00000034071.15	Zfp551	57.6332	-1.02111	0.486909	2.09713	0.0359823	0.397731	-0.785401	0.47521	-1.07848	-2.45139	-1.04326	-1.16871
ENSMUSG00000007656.13	Arpp19	990.951	0.364142	0.173877	-2.09425	0.0362381	0.397731	-0.541977	-0.46829	-0.675166	-0.253783	-0.201415	-0.412732
ENSMUSG00000029392.12	Rilpl1	219.623	0.585412	0.279025	-2.09806	0.0358995	0.397731	-0.171586	-0.812139	0.143994	0.293879	0.257172	0.238372
ENSMUSG00000078350.11	Smim1	107.416	0.847789	0.404865	-2.094	0.0362597	0.397731	-0.438996	-1.11227	-1.30271	-0.219333	-0.5837	0.438859
ENSMUSG00000029394.11	Cdk2ap1	543.923	-1.14817	0.548294	2.09407	0.0362538	0.397731	-0.610876	0.524897	-1.69804	-2.17503	-2.05925	-0.927084
ENSMUSG00000042642.13	Flad1	280.303	0.506397	0.241754	-2.09468	0.0361997	0.397731	-0.0534992	-0.0713383	-0.139834	-0.163347	0.521221	0.579396
ENSMUSG00000029700.11	Slc13a1	72.9116	0.929598	0.444095	-2.09324	0.0363275	0.398027	0.201979	0.595249	-0.28635	1.49166	1.0625	0.510397
ENSMUSG00000030972.6	Acsm5	42.5008	1.43628	0.686664	-2.09168	0.0364669	0.398406	-2.3844	-2.0148	-0.516857	-1.08778	0.4307	-0.384475
ENSMUSG00000053297.14	AI854703	191.956	0.954495	0.456323	-2.09171	0.0364646	0.398406	-1.68267	-2.20853	-2.30277	-2.53411	-1.04627	-0.44238
ENSMUSG00000045319.13	Proser2	177.786	0.789477	0.377441	-2.09166	0.036469	0.398406	-0.219859	-1.03158	-0.0927912	0.53479	0.786768	-0.358111
ENSMUSG00000024515.13	Smad4	905.599	-0.46357	0.221602	2.0919	0.0364474	0.398406	0.0555449	0.324042	0.101447	-0.38201	-0.281005	-0.483734
ENSMUSG00000020674.17	Pxdn	218.838	0.669971	0.320452	-2.0907	0.0365547	0.399048	-0.890039	-0.659847	-0.794786	0.0971132	-0.253325	-0.547852
ENSMUSG00000046312.4	Myorg	952.339	0.667035	0.319507	-2.08771	0.0368244	0.399366	0.499276	0.819815	1.08503	0.77584	1.28704	1.91717
ENSMUSG00000024286.8	Ccny	1125.01	-0.379647	0.181786	2.08842	0.0367595	0.399366	-1.64987	-1.66278	-2.06309	-2.46753	-2.34149	-1.98409
ENSMUSG00000043243.15	Fam129c	31.439	-1.19838	0.574335	2.08656	0.0369279	0.399366	0.622363	0.73516	-1.41976	-1.72056	-0.576183	-1.31352
ENSMUSG00000075225.14	Ccdc162	31.4724	-1.29734	0.621863	2.08622	0.036959	0.399366	-1.25997	-0.035063	-0.556551	-1.63939	-1.73163	-3.14407
ENSMUSG00000026020.9	Nop58	856.793	-0.551352	0.26402	2.0883	0.0367709	0.399366	-0.488465	-1.05535	-0.789281	-0.920157	-1.53596	-1.84853
ENSMUSG00000059003.12	Grin2a	700.226	-0.601689	0.288096	2.0885	0.0367529	0.399366	-1.68927	-1.01776	-2.09403	-2.47006	-2.2002	-2.08344
ENSMUSG00000027131.3	Emc4	1669.77	0.330613	0.158328	-2.08815	0.0367847	0.399366	1.33877	1.28945	1.48869	1.6621	1.55756	1.63482
ENSMUSG00000050397.4	Foxl2	21.2128	1.38121	0.661964	-2.08653	0.0369308	0.399366	0.566087	-1.52366	0.722749	1.56016	1.68281	1.33321
ENSMUSG00000029675.12	Eln	788.036	0.550129	0.263676	-2.08638	0.0369441	0.399366	1.7997	1.77535	1.97474	2.65344	1.85303	2.41187
ENSMUSG00000030400.17	Ercc2	312.28	-0.500773	0.239967	2.08684	0.0369023	0.399366	0.349301	0.775065	0.936312	-0.300375	0.14307	0.423432
ENSMUSG00000035266.16	Helq	210.292	-0.727039	0.348409	2.08674	0.0369117	0.399366	-2.02989	-1.38512	-2.38546	-3.85385	-2.65892	-2.18654
ENSMUSG00000002064.10	Sdf2	1027.53	0.417084	0.199646	-2.08912	0.036697	0.399366	1.15745	0.967381	1.60374	1.62299	1.53187	1.60656
ENSMUSG00000078671.11	Chd2	1059.91	-0.710814	0.340199	2.08941	0.0366712	0.399366	-1.56764	-1.97024	-2.91807	-2.49631	-2.9324	-3.24207
ENSMUSG00000029201.14	Ugdh	296.764	0.44979	0.215675	-2.0855	0.0370238	0.399487	-0.827513	-0.852955	-1.3618	-0.559398	-0.626503	-0.793804
ENSMUSG00000021635.14	Rad17	306.367	-0.518153	0.248431	2.08571	0.0370051	0.399487	-0.4968	-1.05986	-1.18446	-1.37251	-1.76634	-1.40171
ENSMUSG00000057778.14	Cyb5d2	182.208	0.617665	0.296249	-2.08495	0.0370736	0.399735	-0.663709	-0.0603676	0.0940684	0.338106	0.059917	0.496184
ENSMUSG00000025020.11	Slit1	214.755	-1.44594	0.693862	2.0839	0.0371692	0.400476	4.55213	3.48956	2.5342	0.302322	2.02189	3.62311
ENSMUSG00000051396.15	Gm45902	111.773	-1.42344	0.68354	2.08246	0.0373007	0.401022	-3.39984	-3.93952	-3.40081	#NAME?	-5.7772	-3.91771
ENSMUSG00000037437.18	Adam32	3.70381	-4.56646	2.19262	2.08264	0.0372837	0.401022	#NAME?	3.62586	#NAME?	#NAME?	#NAME?	-0.919144
ENSMUSG00000070327.14	Rnf213	464.761	-0.959259	0.460847	2.08151	0.037387	0.401083	0.653262	-0.0644799	-0.148637	-0.542015	-0.538829	-1.55582
ENSMUSG00000008450.8	Nutf2	278.142	-0.419925	0.201729	2.08164	0.0373758	0.401083	0.731674	0.925363	0.493067	0.0553779	0.0828188	0.474511
ENSMUSG00000041268.17	Dmxl2	3541.76	-0.423943	0.20365	2.08172	0.037368	0.401083	-0.160666	-0.620764	-0.484508	-0.858227	-0.725354	-1.24429
ENSMUSG00000026036.17	Nif3l1	465.803	-0.346148	0.166379	2.08048	0.0374811	0.40127	0.738561	0.387409	0.653197	0.201606	0.221516	0.0509634
ENSMUSG00000001506.10	Col1a1	5604.33	1.57482	0.75707	-2.08015	0.0375121	0.40127	1.7771	3.46883	4.32846	5.04367	4.06952	5.74459
ENSMUSG00000021822.3	Plau	45.5411	-1.22676	0.589723	2.08023	0.0375041	0.40127	1.24973	3.10374	1.80102	1.50347	0.198636	0.996885
ENSMUSG00000021115.15	Vrk1	153.708	-0.709845	0.341216	2.08034	0.0374943	0.40127	0.486563	0.60371	-0.193959	-0.516726	-0.360649	-0.64772
ENSMUSG00000022610.10	Mapk12	304.737	-0.926009	0.445408	2.07901	0.0376161	0.402093	-1.48788	0.00153503	-1.44008	-2.02044	-2.49445	-1.27052
ENSMUSG00000042293.8	Gm5617	40.0492	1.15809	0.557438	-2.07753	0.0377529	0.403266	0.643641	1.05398	1.71068	2.10439	2.57367	2.30002
ENSMUSG00000015340.10	Cybb	27.2938	1.53934	0.74126	-2.07666	0.0378333	0.40371	-1.96764	-0.929116	-1.04501	0.847007	0.36228	-0.426673
ENSMUSG00000062963.10	Ufc1	747.108	0.392109	0.188832	-2.07649	0.0378487	0.40371	0.470638	0.558881	0.678466	0.970349	0.819925	0.819268
ENSMUSG00000046160.6	Olig1	1573.52	0.605178	0.291485	-2.07619	0.0378764	0.403717	0.953095	0.513486	1.12134	1.04934	1.29108	1.91277
ENSMUSG00000049907.8	Rasl11b	489.163	0.754374	0.363553	-2.075	0.0379861	0.403718	-0.1613	0.203151	0.957478	1.40211	1.13115	0.708345
ENSMUSG00000031143.4	Ccdc22	301.005	-2.76428	1.33237	2.0747	0.0380139	0.403718	12.0627	10.4066	11.8399	9.34522	8.9467	9.94184
ENSMUSG00000018293.4	Pfn1	2379.11	0.39487	0.190314	-2.07483	0.0380021	0.403718	1.76517	2.27591	2.38664	2.42871	2.33694	2.56616
ENSMUSG00000005625.15	Psmd4	1751.86	-0.319897	0.154177	2.07487	0.0379982	0.403718	1.21364	1.48475	1.39352	1.0259	1.03694	0.778999
ENSMUSG00000032590.14	Apeh	524.581	0.507096	0.24445	-2.07443	0.038039	0.403718	0.0229822	0.0176923	0.386152	0.545288	0.692195	0.451373
ENSMUSG00000038587.9	Akap12	1216.01	0.417698	0.201397	-2.07401	0.0380787	0.403851	0.434235	-0.0812422	0.544225	0.756678	0.561342	0.550471
ENSMUSG00000062627.9	Mysm1	540.928	-0.506722	0.244664	2.07109	0.0383501	0.403855	-1.13527	-1.13999	-1.73812	-1.54471	-1.87101	-2.4211
ENSMUSG00000013858.14	Tmem259	1471.05	0.541333	0.261284	-2.07182	0.0382824	0.403855	0.265944	0.507807	0.428483	0.518529	0.616202	1.3087
ENSMUSG00000073002.9	Vamp5	33.5099	1.1466	0.553595	-2.07119	0.0383408	0.403855	0.0854849	-0.871408	0.175695	0.619051	1.24068	0.950637
ENSMUSG00000031156.18	Slc35a2	563.836	0.49629	0.239418	-2.07291	0.0381811	0.403855	1.10638	1.65925	1.95439	1.79556	1.86809	2.26586
ENSMUSG00000033268.8	Duox1	15.3236	-2.46632	1.19039	2.07185	0.0382793	0.403855	#NAME?	0.132831	-2.29658	-3.12342	-3.77332	-3.71908
ENSMUSG00000001943.8	Vsig2	24.7208	-2.16364	1.04341	2.07363	0.0381137	0.403855	-0.667739	-0.179648	-3.44626	-4.007	-4.55365	-2.22393
ENSMUSG00000096606.2	Tpbgl	27.7657	1.73249	0.836344	-2.07151	0.0383111	0.403855	0.0374	-2.39626	-0.0747367	-0.205218	1.94983	2.5101
ENSMUSG00000025381.3	Cnpy2	581.859	0.57144	0.275746	-2.07235	0.0382333	0.403855	1.21722	0.786507	0.800365	1.55899	0.913011	1.70009
ENSMUSG00000030451.16	Herc2	3660.54	-0.556393	0.268606	2.07141	0.0383205	0.403855	0.0725119	-0.364811	-0.266489	-1.22378	-0.722154	-0.635304
ENSMUSG00000021364.16	Elovl2	742.13	0.489612	0.236552	-2.06979	0.0384721	0.404363	-0.334367	-0.0577519	0.202177	0.135127	0.38902	0.473809
ENSMUSG00000038909.16	Kat7	1201.13	-0.390971	0.189006	2.06857	0.0385869	0.404363	-0.359563	-0.39542	-0.560064	-0.60285	-1.03234	-1.17649
ENSMUSG00000019943.10	Atp2b1	5533.06	-0.429466	0.207625	2.06847	0.0385957	0.404363	0.0269056	-0.313087	-0.878887	-0.919233	-0.872508	-0.892076
ENSMUSG00000044393.15	Dsg2	40.6178	1.38723	0.670644	-2.06851	0.0385925	0.404363	-0.332084	-0.743111	1.17738	1.17032	0.41604	2.42092
ENSMUSG00000031728.10	Zfp821	277.671	-0.537474	0.259868	2.06826	0.0386155	0.404363	-0.445987	-0.0336208	-1.02602	-1.24362	-1.09325	-1.05782
ENSMUSG00000026208.9	Des	52.3817	1.59021	0.768743	-2.06859	0.0385848	0.404363	-1.03146	#NAME?	-0.050815	1.43935	-0.357664	-0.00153761
ENSMUSG00000027522.15	Stx16	889.895	-0.617945	0.298624	2.06931	0.0385171	0.404363	-1.32387	-1.07839	-2.07871	-2.70382	-2.18267	-1.76277
ENSMUSG00000073771.11	Btbd19	24.64	-1.5566	0.753018	2.06715	0.0387199	0.404604	-0.284124	0.641682	-0.211642	-3.84443	-2.29077	-0.28478
ENSMUSG00000080717.10	B230307C23Rik	46.9761	-1.01687	0.491868	2.06736	0.0386999	0.404604	-0.83788	-0.652322	-0.47514	-1.68843	-1.4429	-2.61159
ENSMUSG00000033177.13	Tmprss7	24.8643	-1.56913	0.759232	2.06674	0.0387591	0.40473	-0.530836	-1.53585	-0.915949	-2.91511	-4.50995	-1.57057
ENSMUSG00000019054.13	Fis1	1266.25	0.375409	0.181789	-2.06508	0.0389157	0.40608	0.753406	0.442086	0.496526	0.697499	0.769646	1.11948
ENSMUSG00000055301.8	Adh7	2.12292	-6.42413	3.11579	2.0618	0.0392273	0.40698	#NAME?	7.03762	#NAME?	#NAME?	#NAME?	1.05519
ENSMUSG00000020594.14	Pum2	2890.11	-0.558382	0.271077	2.05986	0.0394116	0.40698	-0.805635	-0.6073	-1.37682	-1.64758	-1.73182	-1.31076
ENSMUSG00000031059.9	Ndufb11	1389.3	0.391059	0.189842	-2.05992	0.0394061	0.40698	1.04417	1.11753	0.490401	1.1741	0.906773	1.44156
ENSMUSG00000091264.3	Smim13	1243.53	0.375126	0.182038	-2.0607	0.0393316	0.40698	-2.69191	-2.64548	-2.64396	-2.43218	-2.48155	-2.231
ENSMUSG00000061360.8	Phf5a	292.803	0.569559	0.276426	-2.06044	0.0393567	0.40698	-0.379763	-0.970768	-0.369344	-0.127169	-0.350733	0.334101
ENSMUSG00000063047.9	Zfp780b	230.195	-0.712073	0.345163	2.06301	0.0391119	0.40698	-1.18501	-1.84688	-1.58492	-1.71336	-2.55804	-2.63928
ENSMUSG00000066568.12	Lsm14a	1237.7	-0.308517	0.149525	2.06331	0.0390828	0.40698	-0.127932	-0.434237	-0.532319	-0.681791	-0.854717	-0.739599
ENSMUSG00000015852.13	Fcrls	359.728	0.820444	0.39781	-2.0624	0.0391696	0.40698	-0.195079	0.472352	0.0164646	1.24433	0.0905171	0.834809
ENSMUSG00000037572.17	Wdhd1	130.923	-0.632222	0.306894	2.06007	0.0393921	0.40698	0.0519137	-0.366553	-1.16418	-1.4122	-1.04255	-1.09096
ENSMUSG00000001166.17	Oas1c	8.22385	-3.4276	1.66375	2.06016	0.039383	0.40698	#NAME?	1.23204	-2.09568	-3.14319	#NAME?	#NAME?
ENSMUSG00000038299.16	Wdr36	611.567	-0.366352	0.17757	2.06315	0.0390986	0.40698	0.567139	0.417291	0.527211	0.304121	-0.0302071	-0.147626
ENSMUSG00000022971.18	Ifnar2	253.261	0.552527	0.268079	-2.06106	0.0392974	0.40698	0.494748	-0.153319	0.754926	0.987177	1.05455	0.565519
ENSMUSG00000061410.6	Zcchc14	1076.35	-0.555737	0.269445	2.06252	0.039158	0.40698	-1.78567	-1.29533	-1.46008	-2.28849	-2.25095	-1.94504
ENSMUSG00000015501.10	Hivep2	2702.04	-0.459202	0.222983	2.05936	0.0394594	0.407191	-0.474418	-1.02669	-1.03958	-1.43975	-1.50655	-1.26692
ENSMUSG00000056211.13	R3hdm1	1350.43	-0.391485	0.19018	2.0585	0.0395423	0.407765	-0.849374	-0.889894	-1.26506	-1.63253	-1.28547	-1.55503
ENSMUSG00000059975.15	Zfp74	273.67	-0.503501	0.244653	2.05802	0.0395879	0.407953	-0.800332	-0.366758	-1.05417	-0.999631	-1.3466	-1.65599
ENSMUSG00000029836.15	Cbx3	930.562	-0.49514	0.241105	2.05363	0.0400117	0.40858	-0.000666565	0.00503876	-0.758054	-0.551437	-0.807224	-1.13151
ENSMUSG00000010142.12	Tnfrsf13b	6.9057	3.12909	1.5229	-2.05469	0.0399094	0.40858	#NAME?	#NAME?	#NAME?	-2.28327	-1.54217	0.538795
ENSMUSG00000055116.8	Arntl	764.392	-0.409314	0.199381	2.05292	0.0400799	0.40858	0.080119	-0.331156	-0.577299	-0.845417	-0.801467	-0.701689
ENSMUSG00000078784.8	Rbis	199.565	0.639131	0.311106	-2.05438	0.0399389	0.40858	-0.384837	0.046177	-0.24391	0.470168	0.391001	0.103194
ENSMUSG00000031399.15	Fam3a	278.786	0.48191	0.234849	-2.052	0.0401697	0.40858	0.257865	0.0475908	-0.260704	0.274808	0.365335	0.604717
ENSMUSG00000042742.7	Bmt2	577.207	-0.449875	0.219195	2.05239	0.0401314	0.40858	-0.348342	-0.421543	-0.838331	-1.01616	-0.937679	-1.32696
ENSMUSG00000036198.12	Arhgap36	47.7316	-2.42677	1.18023	2.05619	0.0397645	0.40858	3.94371	2.39245	2.22837	-0.952514	-0.0878757	1.95655
ENSMUSG00000035354.9	Uvrag	503.128	-0.361669	0.176146	2.05324	0.0400497	0.40858	-0.214354	-0.150597	-0.47387	-0.791707	-0.684951	-0.728255
ENSMUSG00000009281.6	Rarres2	350.021	0.64079	0.311899	-2.05448	0.0399291	0.40858	1.3054	2.34513	2.65459	2.71858	2.48001	2.72125
ENSMUSG00000029171.12	Pgm2	173.887	-0.544335	0.264688	2.05652	0.0397324	0.40858	0.700782	0.766179	0.223999	-0.0919343	-0.214512	0.0802545
ENSMUSG00000107002.1	0610012G03Rik	395.577	0.706419	0.343679	-2.05546	0.0398343	0.40858	0.762332	0.754683	0.965918	1.15181	1.05474	2.04683
ENSMUSG00000042246.5	Tmc7	389.268	0.442512	0.215554	-2.0529	0.0400819	0.40858	-0.125798	-0.787647	-0.25742	0.040446	-0.0217999	-0.0387715
ENSMUSG00000004661.15	Arid3b	57.3114	-1.08504	0.527771	2.0559	0.0397924	0.40858	-1.9125	-0.460803	-1.17978	-2.37266	-2.54341	-2.01829
ENSMUSG00000038535.17	Zfp280d	702.569	-0.559591	0.272663	2.05231	0.0401391	0.40858	-0.162856	-0.101855	-0.83975	-0.63784	-1.04526	-1.43272
ENSMUSG00000074575.4	Kcng1	9.22902	-2.41571	1.17569	2.05473	0.0399054	0.40858	2.68418	#NAME?	2.31671	0.35637	-0.301642	-0.311767
ENSMUSG00000034563.16	Ccpg1	1157.97	0.563187	0.274353	-2.05279	0.0400932	0.40858	6.58749	6.55217	5.93108	6.99403	6.99575	6.37484
ENSMUSG00000054675.5	Tmem119	125.017	1.00467	0.488702	-2.05578	0.0398033	0.40858	-0.567791	-0.827796	1.26376	0.748558	0.787182	1.7018
ENSMUSG00000009214.9	Mymk	3.44517	-4.48054	2.18395	2.05157	0.0402111	0.408721	#NAME?	4.73416	6.112	0.969918	1.36054	4.10025
ENSMUSG00000006333.14	Rps9	1589.94	0.443153	0.216272	-2.04905	0.0404573	0.409437	-0.722637	-0.556559	-0.446393	-0.0610619	-0.498607	-0.122332
ENSMUSG00000040022.14	Rab11fip2	586.441	-0.629175	0.307056	2.04906	0.0404566	0.409437	-1.02353	-1.15781	-1.84273	-2.43319	-1.49527	-2.35772
ENSMUSG00000026439.14	Rbbp5	832.564	-0.413506	0.201743	2.04967	0.0403965	0.409437	-0.957908	-0.416204	-1.11462	-1.16229	-1.36214	-1.42753
ENSMUSG00000040740.7	Slc25a34	119.19	1.01601	0.495693	-2.04967	0.0403965	0.409437	-0.669788	-0.814355	-1.5565	-1.09071	-0.271557	0.598494
ENSMUSG00000075229.11	Ccdc58	89.0484	0.69285	0.338207	-2.0486	0.0405013	0.409437	-0.505474	-1.31183	-0.376652	0.0641479	-0.324994	0.0816904
ENSMUSG00000026147.16	Col9a1	61.5973	1.95711	0.955226	-2.04885	0.0404769	0.409437	-0.948763	0.248375	-1.50299	-0.96275	2.40702	-0.403
ENSMUSG00000078771.10	Evi2a	309.241	0.681972	0.332624	-2.05028	0.040337	0.409437	-0.305198	-0.624338	-0.324176	0.340253	-0.0651746	0.283309
ENSMUSG00000029175.17	Slc35f6	690.537	0.430457	0.210406	-2.04585	0.0407715	0.409695	0.867678	1.0057	0.976617	1.05693	1.13787	1.63265
ENSMUSG00000028149.12	Rap1gds1	3592.13	-0.26435	0.129215	2.04582	0.0407743	0.409695	0.29858	0.342956	0.0971222	0.00591206	-0.0761072	-0.283614
ENSMUSG00000041959.14	S100a10	488.027	0.458727	0.224097	-2.04701	0.0406575	0.409695	1.09585	1.3799	0.794531	1.57643	1.0549	1.73203
ENSMUSG00000042109.8	Csdc2	2480.16	0.413785	0.202108	-2.04735	0.0406236	0.409695	-1.46914	-1.40855	-0.940314	-1.28735	-0.7929	-0.765099
ENSMUSG00000001247.16	Lsr	165.77	0.903846	0.441546	-2.047	0.0406581	0.409695	2.40132	1.24695	2.73762	3.54423	2.37689	3.15354
ENSMUSG00000042460.5	C1galt1	214.367	-1.21229	0.592481	2.04613	0.0407437	0.409695	-2.64442	-0.588185	-3.61116	-3.00162	-3.18419	-3.04026
ENSMUSG00000028677.19	Rnf220	1011.29	-0.386857	0.189001	2.04685	0.0406733	0.409695	-0.925667	-0.994084	-1.43187	-1.9946	-1.42582	-1.40519
ENSMUSG00000039473.8	Ubn1	752.601	-0.508179	0.248332	2.04637	0.0407198	0.409695	-1.99739	-1.39952	-1.88775	-2.40136	-2.17202	-2.45344
ENSMUSG00000020390.12	Ube2b	1760.96	0.336816	0.164743	-2.0445	0.0409043	0.409952	-0.00980148	-0.368482	-0.417894	-0.025331	-0.0993962	0.0730214
ENSMUSG00000020580.10	Rock2	3011.44	-0.438156	0.214238	2.04518	0.0408373	0.409952	-0.686906	-0.588174	-1.39326	-1.28565	-1.59481	-1.34276
ENSMUSG00000028792.14	Ak2	371.159	0.583156	0.28524	-2.04444	0.0409099	0.409952	0.181088	0.175902	0.3213	0.927992	0.813408	0.438658
ENSMUSG00000066975.12	Cryba4	10.5151	-3.31551	1.62138	2.04487	0.0408672	0.409952	4.30634	2.36954	6.52704	-2.2102	-0.783209	1.44608
ENSMUSG00000023272.4	Creld2	318.466	0.658593	0.322252	-2.04372	0.0409812	0.410208	0.365904	0.974839	-0.0556789	0.996803	0.380412	1.44367
ENSMUSG00000004098.7	Col5a3	102.569	0.792567	0.387824	-2.04363	0.0409905	0.410208	-0.863155	-1.86305	-0.970985	-0.23803	-1.06096	-0.198987
ENSMUSG00000017607.9	Tns4	6.08324	-3.38897	1.65911	2.04264	0.0410877	0.41049	2.17114	2.79492	4.52704	-0.369497	#NAME?	0.192631
ENSMUSG00000001946.14	Esam	610.438	0.735984	0.360334	-2.04251	0.0411014	0.41049	1.23677	1.13553	1.58123	2.57111	1.8575	1.33737
ENSMUSG00000021033.11	Gstz1	338.199	0.44921	0.219876	-2.04301	0.0410514	0.41049	0.0947644	-0.330484	0.0395664	0.215543	0.466643	0.227656
ENSMUSG00000029797.13	Sspo	36.9978	-1.48347	0.726464	2.04204	0.0411479	0.410609	-0.0493864	-1.53585	-1.62763	-2.39315	-3.33211	-1.48838
ENSMUSG00000075470.2	Alg10b	1168.44	-0.487601	0.238912	2.04092	0.0412585	0.411233	-1.22139	-0.724193	-1.2888	-1.6808	-1.77693	-1.47919
ENSMUSG00000022560.9	Slc52a2	190.516	0.750882	0.368105	-2.03986	0.0413642	0.412011	-0.064758	-0.560315	0.867715	0.613828	0.68686	1.17195
ENSMUSG00000042772.15	Smg7	1725.92	-0.335183	0.164407	2.03874	0.0414758	0.41275	-0.267769	-0.223077	-0.419828	-0.848791	-0.556256	-0.809553
ENSMUSG00000021371.5	Mcur1	247.021	0.513815	0.252048	-2.03856	0.0414939	0.41275	-1.41121	-0.989742	-1.51705	-0.925621	-1.06437	-0.650813
ENSMUSG00000037624.15	Kcnk2	282.761	-0.680243	0.333964	2.03687	0.0416629	0.414155	-0.656527	-0.00180828	-1.65146	-1.69056	-1.28174	-1.34822
ENSMUSG00000019929.16	Dcn	839.785	0.74294	0.365018	-2.03535	0.0418155	0.415029	0.700385	1.40282	0.805234	2.16774	0.775532	1.79564
ENSMUSG00000110332.1	Gm19935	62.0161	1.30318	0.640332	-2.03516	0.0418344	0.415029	-0.190921	-1.68003	-2.89501	-0.584241	-0.97946	1.24841
ENSMUSG00000022323.11	Rida	645.832	0.621615	0.305654	-2.03372	0.0419794	0.415637	0.144365	0.522448	0.702971	1.27854	0.565577	1.08662
ENSMUSG00000020257.13	Wdr82	2919.15	-0.385057	0.189362	2.03345	0.0420072	0.415637	-0.420764	0.0198246	-0.607748	-0.874096	-0.665221	-0.852833
ENSMUSG00000029826.14	Zc3hav1	167.957	-0.660219	0.324792	2.03275	0.0420781	0.416062	0.386348	0.124294	0.283897	-0.0631067	-0.3219	-1.14917
ENSMUSG00000027257.13	Pacsin3	549.739	0.632853	0.31139	-2.03235	0.0421184	0.416184	-1.39456	-1.09754	-0.90484	-0.356961	-0.998293	-0.453766
ENSMUSG00000003464.13	Pex19	1424.45	0.306685	0.151012	-2.03087	0.0422682	0.416223	-0.0460646	0.0225333	0.1639	0.160902	0.311451	0.320225
ENSMUSG00000021950.15	Anxa8	10.8384	2.04934	1.0094	-2.03024	0.0423316	0.416223	-1.25051	#NAME?	0.614658	1.29584	1.45851	0.216867
ENSMUSG00000027472.14	Pdrg1	642.691	0.558689	0.275239	-2.02983	0.0423737	0.416223	-0.639171	-0.67394	-0.232552	0.0601915	0.0522125	-0.172998
ENSMUSG00000027314.6	Dll4	124.142	0.838457	0.413016	-2.03008	0.0423482	0.416223	0.481721	0.577503	0.536988	1.47382	1.56737	0.648185
ENSMUSG00000052707.8	Tnrc6a	1299.2	-0.498367	0.245321	2.03149	0.0422055	0.416223	-1.64543	-2.09881	-2.28677	-2.59939	-2.25309	-2.97464
ENSMUSG00000049796.4	Crh	9.21093	-3.81956	1.88114	2.03045	0.0423106	0.416223	5.61148	2.41596	7.98647	1.73789	1.05826	4.51463
ENSMUSG00000090066.2	1110002E22Rik	8.02285	-3.2685	1.60913	2.03122	0.0422325	0.416223	-0.123179	3.15666	-1.27294	-2.09314	-2.73673	#NAME?
ENSMUSG00000020903.13	Stx8	376.792	0.473815	0.233313	-2.03081	0.0422741	0.416223	0.662855	0.800249	0.606352	1.2678	1.02921	0.84273
ENSMUSG00000011034.6	Slc5a1	240.085	0.61014	0.300393	-2.03114	0.0422406	0.416223	0.200174	0.429297	0.328264	1.03878	1.07341	0.44405
ENSMUSG00000062729.11	Ppox	247.374	0.536958	0.264598	-2.02934	0.0424237	0.41644	-1.4306	-1.6275	-2.0214	-1.54042	-1.2103	-0.972258
ENSMUSG00000030588.12	Yif1b	1283.2	0.353242	0.174111	-2.02884	0.0424751	0.416669	2.08833	2.1385	2.23322	2.12403	2.45019	2.67452
ENSMUSG00000029570.5	Lfng	731.284	0.868958	0.428445	-2.02817	0.0425432	0.417063	1.00919	1.38382	1.40607	1.22171	1.67093	2.88839
ENSMUSG00000032589.14	Bsn	4611.4	-0.758346	0.374008	2.02762	0.0425988	0.417334	-0.0374441	-0.170686	0.209076	-1.40496	-0.773043	-0.634941
ENSMUSG00000002396.8	Ocel1	89.2027	1.20703	0.595568	-2.02668	0.0426952	0.417925	-5.44033	#NAME?	-2.54197	-2.72643	-2.35818	-2.82729
ENSMUSG00000030265.14	Kras	1486.54	-0.310736	0.153337	2.02648	0.0427153	0.417925	-1.58196	-1.72865	-1.99152	-2.08427	-2.07791	-2.36742
ENSMUSG00000034037.14	Fgd5	120.982	-0.705388	0.348286	2.02532	0.042835	0.418547	0.737264	0.322979	-0.227029	-0.206929	-1.07091	-0.387002
ENSMUSG00000030882.19	Dnhd1	50.6659	-1.21185	0.598349	2.02533	0.0428336	0.418547	-1.35399	-0.400494	-1.52569	-2.92374	-2.47962	-1.77292
ENSMUSG00000001018.15	Snapin	498.05	0.515126	0.254499	-2.02408	0.0429623	0.419516	-0.433231	-0.410101	-0.798134	-0.531848	-0.233032	0.287412
ENSMUSG00000047547.14	Cltb	2340.16	0.268381	0.132634	-2.02347	0.0430244	0.419847	0.413371	0.223345	0.093341	0.487427	0.385471	0.394105
ENSMUSG00000000374.8	Trappc10	1511.95	-0.506777	0.250606	2.02221	0.0431548	0.420812	-0.527119	-0.260097	-0.2572	-1.51508	-0.8005	-0.659447
ENSMUSG00000060780.2	Lrrtm1	238.574	-0.62369	0.308457	2.02197	0.0431798	0.420812	1.98934	1.66237	1.42774	0.388733	0.979173	1.37857
ENSMUSG00000032060.10	Cryab	1074.18	0.50953	0.252112	-2.02104	0.0432753	0.421467	0.264885	0.214388	0.495926	1.05156	0.277897	0.831585
ENSMUSG00000042396.10	Rbm7	504.129	-0.391544	0.193842	2.01991	0.0433931	0.422338	-0.129568	-0.320978	-0.726696	-0.664513	-0.897807	-1.08853
ENSMUSG00000053647.4	Gper1	39.9983	1.10606	0.547672	-2.01957	0.0434277	0.422399	0.376881	-1.77236	-0.882276	0.824869	0.631523	0.00208704
ENSMUSG00000026029.14	Casp8	45.1336	1.38236	0.684659	-2.01905	0.0434825	0.422461	-2.23178	-1.53585	0.979214	-0.0242495	1.12506	0.865881
ENSMUSG00000049643.15	2310022A10Rik	344.191	-0.548908	0.271986	2.01815	0.0435757	0.422461	0.14721	1.07383	0.466732	0.170303	-0.0630449	-0.20603
ENSMUSG00000002885.14	Adgre5	435.092	0.519048	0.257168	-2.01833	0.0435574	0.422461	1.53274	1.91284	1.30923	2.23715	1.96565	1.73538
ENSMUSG00000032261.16	Sh3bgrl2	334.529	0.584521	0.289616	-2.01826	0.0435639	0.422461	-2.20375	-3.60886	-1.86705	-1.83715	-1.88388	-1.89311
ENSMUSG00000026627.7	Pacc1	209.224	0.542577	0.268834	-2.01826	0.0435639	0.422461	0.742406	-0.03513	0.604953	1.04184	1.1563	0.596085
ENSMUSG00000020328.10	Nudcd2	267.273	0.513124	0.254359	-2.01732	0.043662	0.423015	0.0016145	-0.181944	-0.145563	0.470424	0.148646	0.343103
ENSMUSG00000038633.5	Degs1	2607.23	0.316927	0.157144	-2.0168	0.0437168	0.423015	1.21434	1.05997	1.20248	1.55345	1.29392	1.28196
ENSMUSG00000117286.1	Gm1043	46.3941	-2.01302	0.998258	2.01653	0.0437447	0.423015	-1.694	-4.15441	-3.60355	-5.14573	-5.82534	-4.45621
ENSMUSG00000075700.9	Selenot	3203.37	0.409741	0.203353	-2.01493	0.0439123	0.424343	-0.664964	-0.889607	-1.00262	-0.636658	-0.802474	-0.234038
ENSMUSG00000006649.17	Nphs1	6.89404	3.15072	1.56504	-2.0132	0.0440941	0.424409	#NAME?	#NAME?	#NAME?	-0.897644	-0.72323	0.12988
ENSMUSG00000062184.11	Hs6st2	772.054	-0.401952	0.199582	2.01397	0.0440129	0.424409	0.541618	1.00585	0.179859	0.0709885	0.0750433	0.1328
ENSMUSG00000045107.5	Saysd1	127.081	0.913521	0.454121	-2.01162	0.0442595	0.424409	0.503169	-0.280231	1.58612	1.66504	1.96117	1.29619
ENSMUSG00000028423.15	Nfx1	1381.45	-0.494628	0.245746	2.01277	0.0441392	0.424409	-0.498446	-0.495469	-0.698542	-0.739586	-1.2079	-1.64471
ENSMUSG00000050890.15	Pdik1l	229.167	-0.598037	0.297271	2.01176	0.0442454	0.424409	-1.13381	-1.06019	-1.48968	-1.98736	-1.5212	-2.42954
ENSMUSG00000006920.14	Ezh1	938.753	-0.393908	0.195705	2.01276	0.0441401	0.424409	-0.255829	-0.137816	-0.248192	-0.749954	-0.426347	-0.972129
ENSMUSG00000043556.10	Fbxl7	33.835	1.27072	0.630933	-2.01404	0.0440054	0.424409	#NAME?	-0.629689	-1.67085	-1.00039	-0.132091	-0.3639
ENSMUSG00000008690.15	Ncaph2	1038.87	0.353892	0.175829	-2.01271	0.044145	0.424409	-0.398133	-0.585251	-0.519559	-0.526794	-0.255334	0.0531355
ENSMUSG00000039456.10	Morc3	535.458	-0.445837	0.221566	2.01221	0.0441979	0.424409	-0.499195	-0.388467	-0.961943	-0.814755	-1.34466	-1.35715
ENSMUSG00000017291.13	Taok1	2548.2	-0.463234	0.230266	2.01173	0.0442484	0.424409	-1.29689	-1.36216	-1.91657	-1.95585	-1.96241	-2.23017
ENSMUSG00000062296.8	Trank1	1783.69	-1.03695	0.515484	2.01161	0.0442609	0.424409	-1.16883	-1.5537	-3.24203	-3.94795	-2.83192	-2.41765
ENSMUSG00000035936.6	Aldh5a1	1261.45	0.40636	0.20211	-2.01059	0.0443689	0.425171	-0.511118	-0.922974	-0.299679	-0.386887	-0.0705569	-0.284221
ENSMUSG00000022961.18	Son	6769.79	-0.321856	0.160185	2.00927	0.0445082	0.426232	-1.24299	-1.44723	-1.39475	-1.79189	-1.64365	-1.88586
ENSMUSG00000042312.9	S100a13	355.986	0.557081	0.277301	-2.00894	0.0445437	0.426298	1.22142	2.33022	1.64244	2.33056	1.78386	2.48538
ENSMUSG00000047084.8	Ngrn	534.375	-0.334678	0.166664	2.0081	0.0446322	0.42687	0.0950057	0.380459	-0.143276	-0.347556	-0.40248	-0.20546
ENSMUSG00000026617.16	Bpnt1	1202.33	0.536182	0.267064	-2.00769	0.0446762	0.427017	-0.00824956	0.294333	0.939333	1.07515	0.85192	0.769409
ENSMUSG00000025261.17	Huwe1	5150.4	-0.415903	0.207251	2.00676	0.0447749	0.427142	-0.233919	-0.641549	-0.639804	-1.04043	-0.994039	-0.969455
ENSMUSG00000020929.14	Eftud2	1394.54	-0.379476	0.189099	2.00676	0.0447752	0.427142	0.317361	0.750927	0.632694	0.21984	0.0845541	-0.0221029
ENSMUSG00000015467.14	Egfl8	67.881	1.4634	0.729411	-2.00628	0.0448262	0.427354	1.62337	-2.86398	0.900988	2.11502	2.10371	2.2072
ENSMUSG00000033658.16	Ddx19b	556.848	-0.51788	0.258166	2.006	0.0448562	0.427368	-2.14813	-2.45182	-2.94838	-3.12528	-3.15664	-3.03361
ENSMUSG00000027905.15	Ddx20	334.575	-0.564043	0.28155	2.00335	0.0451396	0.429518	0.806971	0.271802	-0.22661	-0.285721	-0.212558	-0.55267
ENSMUSG00000042404.16	Dennd4b	852.104	-0.583421	0.291272	2.00301	0.0451759	0.429589	-0.598402	-0.332465	-0.672426	-1.94423	-1.26632	-0.619677
ENSMUSG00000050212.4	Eva1b	61.7822	0.848873	0.423973	-2.00219	0.0452647	0.430159	1.2852	0.66124	0.641522	2.04911	1.44949	1.20569
ENSMUSG00000041920.14	Slc16a6	164.672	0.510823	0.255483	-1.99944	0.0455605	0.431743	-0.758829	-0.629885	-0.573089	-0.0190957	-0.308625	-0.408185
ENSMUSG00000033454.6	Zbtb1	237.139	0.524338	0.262241	-1.99945	0.04556	0.431743	-0.995096	-1.36039	-0.968482	-0.381604	-0.714269	-0.850933
ENSMUSG00000040044.11	Orc3	1025.41	-0.367096	0.183556	1.99991	0.0455095	0.431743	-0.319931	-0.230139	-0.010221	-0.400976	-0.638818	-0.924535
ENSMUSG00000068220.6	Lgals1	250.429	0.88884	0.444576	-1.9993	0.0455762	0.431743	0.9845	1.23764	1.30788	2.02381	0.916547	2.69756
ENSMUSG00000049517.8	Rps23	637.049	0.756147	0.378344	-1.99857	0.0456548	0.431938	-1.71428	-2.93372	-2.04429	-1.48456	-2.1942	-0.883178
ENSMUSG00000044791.16	Setd2	1923.64	-0.479844	0.240094	1.99857	0.0456547	0.431938	-0.558565	-0.788497	-1.0933	-1.07274	-1.21324	-1.87602
ENSMUSG00000050840.8	Cdh20	530.145	0.449373	0.224954	-1.99762	0.0457578	0.432363	0.455939	0.213432	0.163783	0.312427	0.542211	0.981776
ENSMUSG00000036854.14	Hspb6	171.233	0.59938	0.300161	-1.99686	0.04584	0.43245	0.2823	0.985946	0.497072	0.51563	1.14553	1.52635
ENSMUSG00000051166.10	Eml5	2282.77	-0.869861	0.435648	1.99671	0.0458572	0.43245	-2.38043	-3.43617	-4.05983	-4.43555	-3.89379	-3.95335
ENSMUSG00000079494.2	Nat8f5	46.2916	1.18936	0.595731	-1.99647	0.045883	0.43245	-0.0162349	-0.66942	-0.205335	-0.0992868	1.08466	1.41901
ENSMUSG00000048264.16	Dip2c	994.376	-0.391601	0.196183	1.99609	0.0459236	0.432559	0.137665	-0.385261	-0.557943	-0.848802	-0.578158	-0.824507
ENSMUSG00000030180.15	Kdm5a	1036.39	-0.433174	0.217255	1.99385	0.0461679	0.433845	-0.796366	-1.29629	-0.974864	-1.23142	-1.65989	-1.72885
ENSMUSG00000070738.10	Dgkd	3628.54	-0.506892	0.254175	1.99427	0.0461227	0.433845	-1.24517	-0.966101	-1.61489	-2.15074	-1.95475	-1.56832
ENSMUSG00000026456.18	Cyb5r1	928.424	-0.663649	0.332861	1.99377	0.0461767	0.433845	0.985446	1.11865	1.09384	0.619351	-0.326902	0.443911
ENSMUSG00000114515.2	Aldoa	8.19695	3.02576	1.51796	-1.99331	0.0462272	0.434046	-0.497395	#NAME?	#NAME?	-0.671228	-1.08978	1.59913
ENSMUSG00000027570.15	Col9a3	1353.17	0.614104	0.308132	-1.99299	0.0462622	0.434102	-0.0498255	0.645758	0.641113	0.586405	0.517201	1.62939
ENSMUSG00000000489.7	Pdgfb	106.714	0.713847	0.358297	-1.99233	0.0463345	0.434423	-1.20584	-1.23954	-0.491167	-0.546827	-0.145561	-0.433358
ENSMUSG00000021959.16	Lats2	251.934	0.788565	0.395942	-1.99162	0.0464131	0.434423	-3.41054	-3.61686	-3.60144	-2.88907	-3.66555	-2.26633
ENSMUSG00000041881.13	Ndufa7	1531.02	0.31377	0.157509	-1.99208	0.046362	0.434423	2.18655	2.5541	2.40049	2.56278	2.49128	2.73706
ENSMUSG00000038398.8	Upf3a	328.234	0.557097	0.279824	-1.99088	0.0464937	0.434904	-0.551133	-0.72738	-0.858674	-0.0789664	-0.0435731	-0.790542
ENSMUSG00000021087.18	Rtn1	16973.1	0.311246	0.156401	-1.99005	0.0465855	0.435233	1.38282	1.35084	1.60306	1.48205	1.77956	1.75022
ENSMUSG00000075419.4	Dolk	470.294	0.371805	0.186833	-1.99003	0.0465872	0.435233	1.43997	1.24555	1.09764	1.34141	1.47332	1.76663
ENSMUSG00000019066.13	Rab3d	229.749	0.870947	0.438421	-1.98655	0.046972	0.438176	-1.01193	-3.40457	-1.47773	-1.03532	-0.549615	-1.00881
ENSMUSG00000031706.7	Rfx1	298.096	-0.628	0.316152	1.98639	0.0469905	0.438176	-0.509377	0.664119	-0.600342	-1.06008	-0.954413	-0.436887
ENSMUSG00000028631.7	Kcnq4	120.149	-0.628573	0.316499	1.98602	0.0470309	0.438279	-0.453476	0.224389	-0.998468	-1.14994	-0.957261	-1.1003
ENSMUSG00000061589.14	Dot1l	1415	-0.608862	0.306621	1.98572	0.0470645	0.438317	-0.889166	-0.863601	-1.93538	-2.38171	-1.77602	-1.56968
ENSMUSG00000034245.10	Hdac11	1694.66	-0.45445	0.228977	1.9847	0.0471779	0.438562	0.926561	0.66355	0.846117	-0.323439	0.458182	0.617849
ENSMUSG00000039357.2	Fut11	407.012	0.435353	0.219414	-1.98416	0.0472379	0.438562	-0.721984	-0.40904	0.0727095	0.0982515	-0.0754314	0.0229361
ENSMUSG00000020530.14	Ggnbp2	1406.82	-0.391479	0.197245	1.98474	0.0471736	0.438562	-0.0568754	-0.262741	-0.747465	-0.584142	-0.857143	-1.11584
ENSMUSG00000000127.15	Fer	311.794	0.535999	0.270121	-1.98429	0.0472237	0.438562	0.113999	-0.382246	-0.557259	0.329869	0.438136	-0.151074
ENSMUSG00000037885.18	Stk35	304.504	0.889961	0.448472	-1.98443	0.0472079	0.438562	-3.30276	-3.32025	-3.18976	-3.05263	-3.21001	-1.689
ENSMUSG00000066149.11	Cdc26	210.522	0.653318	0.329407	-1.98331	0.0473325	0.439165	-2.31373	-3.12627	-2.20963	-1.76938	-2.00974	-1.88115
ENSMUSG00000001942.8	Siae	356.343	0.428344	0.216003	-1.98305	0.0473617	0.439165	0.50831	-0.0206726	0.620503	0.704602	0.876874	0.595725
ENSMUSG00000037331.15	Larp1	1475.94	-0.309713	0.156289	1.98167	0.0475166	0.440326	-1.52976	-1.49769	-1.50548	-1.88238	-1.75657	-2.15334
ENSMUSG00000026436.15	Elk4	302.085	-0.511455	0.25823	1.98062	0.0476342	0.441055	-1.1344	-1.12261	-1.33712	-1.49876	-2.15169	-1.74708
ENSMUSG00000024472.9	Dcp2	1141.34	-0.475454	0.240139	1.97991	0.0477136	0.441055	-2.6112	-2.69237	-2.73688	-3.07002	-3.14601	-3.53886
ENSMUSG00000038047.18	Haus6	159.391	-0.676026	0.341398	1.98017	0.0476843	0.441055	-0.972074	-1.44843	-0.721098	-1.6994	-1.76018	-1.98584
ENSMUSG00000047388.10	Atmin	829.775	-0.490107	0.2475	1.98023	0.0476778	0.441055	-0.113374	0.101502	-0.74257	-0.949224	-0.748822	-0.762304
ENSMUSG00000090122.3	Kcne1l	149.784	0.950637	0.480301	-1.97925	0.0477877	0.441466	-1.1082	0.19684	1.23923	0.716033	0.793762	1.64653
ENSMUSG00000038241.16	Cep250	492.363	-0.534147	0.270011	1.97825	0.047901	0.441964	-0.881959	-1.29832	-1.61139	-2.43332	-1.86909	-1.43565
ENSMUSG00000035047.9	Kri1	263.888	-0.702227	0.354928	1.9785	0.0478718	0.441964	0.453889	1.50454	0.20697	0.475031	-0.0759975	-0.539235
ENSMUSG00000019785.14	Clvs2	152.706	-0.781304	0.395326	1.97636	0.0481144	0.443552	1.4655	1.7102	0.756028	-0.0136504	0.857028	0.11444
ENSMUSG00000022130.10	Tgds	82.1354	-0.720956	0.364917	1.97567	0.0481921	0.443552	0.79861	0.447713	-0.16833	-0.174825	-0.720004	-0.503584
ENSMUSG00000031502.11	Col4a1	1757.66	0.622177	0.314883	-1.9759	0.0481665	0.443552	0.646203	0.0716137	0.88938	1.57904	1.12391	0.62506
ENSMUSG00000026211.17	Obsl1	310.915	0.60344	0.305381	-1.97602	0.0481521	0.443552	-0.936449	-1.61033	-1.24564	-1.0119	-0.795357	-0.370772
ENSMUSG00000004207.14	Psap	40076.4	0.302706	0.153257	-1.97515	0.0482515	0.443824	1.40519	1.64252	1.65991	1.67775	1.68122	1.98519
ENSMUSG00000078773.11	Rad54b	12.9224	2.68533	1.36008	-1.9744	0.0483368	0.444164	#NAME?	#NAME?	-1.51379	0.331619	-1.50041	-0.037998
ENSMUSG00000062743.9	Zfp677	55.6877	-0.874007	0.442693	1.9743	0.048348	0.444164	-0.763306	-0.3103	-1.05683	-1.24034	-1.91806	-1.81361
ENSMUSG00000072941.5	Sod3	540.347	0.73056	0.370106	-1.97392	0.048391	0.444285	1.39467	2.31367	2.08082	2.77529	1.92782	2.89536
ENSMUSG00000030641.10	Ddias	14.7625	-2.29057	1.1607	1.97344	0.0484455	0.444412	-2.62503	#NAME?	0.313872	#NAME?	-2.94068	-3.09032
ENSMUSG00000055430.4	Nap1l5	5157.77	0.770756	0.390753	-1.97249	0.048554	0.444412	-0.213224	-0.771137	-0.048523	0.00250743	0.545989	0.615015
ENSMUSG00000030946.13	Lhpp	447.693	0.649111	0.328999	-1.97299	0.048497	0.444412	0.407167	-0.0280854	0.857308	1.03084	1.43432	0.596618
ENSMUSG00000025938.16	Slco5a1	52.2369	-1.16145	0.588757	1.97271	0.0485282	0.444412	-2.31941	-1.2588	-1.57967	-2.1692	-2.90692	-4.06478
ENSMUSG00000044934.13	Zfp367	252.269	-0.998636	0.506245	1.97263	0.0485373	0.444412	-2.05402	-0.214995	-1.90384	-2.70351	-2.42853	-1.72599
ENSMUSG00000028099.8	Polr3c	342.139	-0.366054	0.185799	1.97016	0.0488196	0.444903	-0.0483433	0.324727	0.148397	-0.235737	-0.430967	-0.27976
ENSMUSG00000020176.17	Grb10	691.509	-0.521585	0.264754	1.97007	0.04883	0.444903	0.179102	0.657988	0.194261	-0.369755	-0.140287	-0.304142
ENSMUSG00000037824.6	Tspan14	792.699	0.316953	0.160865	-1.9703	0.0488036	0.444903	0.462904	0.491697	0.767447	0.843625	0.767957	0.77038
ENSMUSG00000019818.15	Cd164	1588.11	0.345177	0.175179	-1.97043	0.0487895	0.444903	-0.0787744	-0.137678	-0.0329973	0.26912	-0.0826839	0.297434
ENSMUSG00000035199.6	Arl6ip5	2020.88	0.33599	0.170505	-1.97056	0.0487746	0.444903	0.858645	1.0628	0.823872	1.17183	0.835377	1.44174
ENSMUSG00000062031.13	Pgghg	100.544	0.639163	0.324161	-1.97175	0.0486385	0.444903	-0.740833	-0.658931	-0.655157	-0.46521	-0.238299	0.272372
ENSMUSG00000045273.8	Cenph	5.22643	3.13387	1.59057	-1.97029	0.0488056	0.444903	#NAME?	#NAME?	-0.00189419	1.4132	1.10741	-0.0228781
ENSMUSG00000016763.15	Scube1	89.2127	1.09328	0.556093	-1.966	0.0492988	0.444905	0.347041	-1.67948	1.45656	1.52777	1.211	0.915976
ENSMUSG00000071014.10	Ndufb6	1317.49	0.434239	0.220696	-1.96759	0.0491155	0.444905	2.96057	2.64537	2.68748	3.24775	3.11725	2.93993
ENSMUSG00000035373.2	Ccl7	4.42494	3.32396	1.69122	-1.96542	0.0493659	0.444905	#NAME?	#NAME?	#NAME?	1.24983	2.32271	2.03105
ENSMUSG00000032766.9	Gng11	275.018	1.10435	0.56226	-1.96412	0.0495158	0.444905	-0.847191	-0.18834	0.30722	1.83273	0.361129	-0.0306549
ENSMUSG00000034430.16	Zxdc	533.872	-0.380215	0.193396	1.96599	0.0493001	0.444905	0.461029	0.363962	0.589511	0.0428876	0.124747	-0.154649
ENSMUSG00000028018.15	Gstcd	148.287	-0.768012	0.39074	1.96553	0.0493524	0.444905	-0.163571	0.635617	-0.409306	-0.917076	-0.859926	-0.470953
ENSMUSG00000034602.15	Mon2	1811.08	-0.254744	0.129601	1.9656	0.0493445	0.444905	0.0647174	-0.0323429	-0.0505249	-0.416679	-0.303002	-0.345579
ENSMUSG00000056215.13	Lrguk	17.9252	1.87496	0.954375	-1.9646	0.0494607	0.444905	-2.2625	#NAME?	0.0804103	-0.477487	0.0790967	0.49464
ENSMUSG00000028480.14	Glipr2	120.678	0.797374	0.405751	-1.96518	0.0493934	0.444905	0.5525	-0.781949	-0.824655	-0.119116	0.303494	0.873231
ENSMUSG00000026100.6	Mstn	6.14268	2.85433	1.45202	-1.96576	0.0493262	0.444905	#NAME?	#NAME?	-1.02792	0.630503	-0.255831	0.704338
ENSMUSG00000036989.16	Trim3	2897.22	-0.315749	0.160436	1.96807	0.0490605	0.444905	0.0178162	0.175916	0.0176562	-0.661812	-0.328726	-0.0548537
ENSMUSG00000040006.13	Ginm1	377.971	0.508105	0.258626	-1.96463	0.0494566	0.444905	0.477441	0.843072	0.266635	1.29169	0.605769	0.855449
ENSMUSG00000030691.15	Fchsd2	731.012	-0.348513	0.177453	1.96397	0.0495334	0.444905	-0.502559	-0.829537	-0.796588	-0.96893	-1.17263	-1.31316
ENSMUSG00000010086.17	Rnf112	3263.82	-0.511074	0.260145	1.96458	0.0494634	0.444905	-0.823418	-0.404996	-1.51108	-1.73936	-1.71685	-1.05611
ENSMUSG00000038523.10	1700003F12Rik	16.4996	2.07917	1.05797	-1.96524	0.0493867	0.444905	-2.10917	-1.07259	-3.92702	-1.28327	-0.547283	0.261801
ENSMUSG00000034761.15	Map4k5	773.899	-0.41735	0.212502	1.96399	0.0495318	0.444905	-0.257141	-0.576686	-0.938249	-0.904919	-1.24315	-1.11362
ENSMUSG00000096215.8	Smim22	6.77488	5.11802	2.59875	-1.96941	0.0489055	0.444905	0.93151	#NAME?	#NAME?	5.47716	1.48039	7.80069
ENSMUSG00000043336.14	Filip1l	59.796	1.30884	0.665176	-1.96766	0.0491074	0.444905	-0.508605	-3.71191	0.620224	1.47576	0.703372	-0.289666
ENSMUSG00000037221.13	Mospd3	188.089	0.717035	0.364268	-1.96843	0.0490191	0.444905	-0.829538	-0.242833	0.104291	-0.418644	0.606258	0.610347
ENSMUSG00000040759.9	Cmtm5	1503.44	0.453051	0.230727	-1.96358	0.0495794	0.444931	1.05246	1.62235	1.70367	1.71382	1.53984	2.19361
ENSMUSG00000098950.7	Gm28036	17.3113	-2.68739	1.36872	1.96343	0.049596	0.444931	2.4621	4.9937	6.52704	1.5985	0.473296	1.51456
ENSMUSG00000055762.16	Eef1d	1019.2	0.362168	0.184636	-1.96152	0.0498183	0.445049	-0.119881	-0.241405	-0.0853011	0.187239	-0.0688369	0.265697
ENSMUSG00000042745.9	Id1	442.499	0.601607	0.30659	-1.96225	0.0497329	0.445049	1.45353	0.868506	1.67586	2.1265	1.77705	1.85359
ENSMUSG00000040943.12	Tet2	430.23	-0.529502	0.269771	1.96278	0.0496719	0.445049	-1.14299	-1.71777	-1.46639	-2.19492	-1.58935	-2.50571
ENSMUSG00000015647.9	Lama5	334.783	-0.514227	0.26207	1.96217	0.0497424	0.445049	1.34257	2.02328	1.49928	0.769388	1.01224	1.25669
ENSMUSG00000066613.14	Zfp932	260.267	0.874081	0.445494	-1.96205	0.0497568	0.445049	-4.34622	-4.22086	-4.63346	-3.86596	-3.72629	-3.34986
ENSMUSG00000040594.19	Ranbp17	186.778	-0.5673	0.289211	1.96155	0.0498153	0.445049	-0.168303	-0.696149	-0.120754	-1.28248	-0.783521	-0.935989
ENSMUSG00000031887.13	Tradd	76.2164	0.864259	0.440522	-1.9619	0.0497745	0.445049	0.286668	0.466254	0.00719398	0.650422	0.993006	1.40572
ENSMUSG00000025963.5	Mdh1b	12.6526	-1.96079	1.00025	1.9603	0.0499606	0.446054	0.654877	2.86817	1.04038	0.68769	-0.714988	-1.7228
ENSMUSG00000063200.4	Nol7	858.433	0.520327	0.265772	-1.9578	0.050254	0.446917	0.376251	0.214428	0.152093	1.26081	0.258824	0.391624
ENSMUSG00000039841.14	Zfp800	371.515	-0.626168	0.31972	1.95849	0.0501728	0.446917	0.482058	0.236973	-0.0878807	0.102483	-0.557016	-1.25068
ENSMUSG00000020385.16	Clk4	778.208	0.508654	0.259656	-1.95895	0.0501186	0.446917	-2.57027	-2.65564	-2.65725	-1.91932	-2.18521	-2.57819
ENSMUSG00000016028.10	Celsr1	29.325	-1.23472	0.630495	1.95834	0.0501906	0.446917	0.0407688	0.533888	-0.858216	-0.84239	-2.08446	-1.03027
ENSMUSG00000021373.16	Cap2	1438.58	0.441876	0.225713	-1.95769	0.050266	0.446917	-0.316952	-0.629956	0.0263008	0.0691135	0.309151	-0.184112
ENSMUSG00000039231.18	Suv39h1	221.36	-0.478396	0.244369	1.95768	0.0502673	0.446917	-0.610225	-0.468223	-0.997726	-1.39089	-1.12306	-1.24628
ENSMUSG00000043067.15	Dpy19l1	974.267	0.260305	0.132873	-1.95906	0.0501059	0.446917	0.238166	0.198765	0.174492	0.337304	0.295288	0.487806
ENSMUSG00000025521.15	Tmem192	187.903	0.517419	0.264455	-1.95654	0.0504012	0.447306	-0.0986502	0.0740192	0.0607122	0.280793	0.377575	0.670492
ENSMUSG00000026895.7	Ndufa8	1473.14	0.291652	0.14906	-1.9566	0.0503943	0.447306	1.64097	1.82974	1.70238	1.90257	1.87342	2.00212
ENSMUSG00000031960.14	Aars	4983.52	-0.309387	0.15809	1.95703	0.0503444	0.447306	0.444807	0.488899	0.624297	0.355306	0.086946	-0.085883
ENSMUSG00000043448.13	Gjc2	781.406	0.652793	0.33369	-1.95628	0.0504317	0.447311	1.84478	1.68069	2.57816	3.1751	2.29755	2.51774
ENSMUSG00000041396.13	Mettl18	58.7546	-1.05591	0.540181	1.95474	0.0506134	0.448656	-0.0418727	1.75006	1.03898	-0.261714	-0.0333641	-0.627449
ENSMUSG00000027067.16	Ssrp1	1661.66	-0.281078	0.143823	1.95434	0.0506612	0.448812	-0.079232	-0.247186	-0.219576	-0.422776	-0.519811	-0.735899
ENSMUSG00000042389.13	Tsen2	214.925	-0.562966	0.288198	1.9534	0.050772	0.449527	0.315711	1.06518	-0.0150465	-0.0643895	-0.376825	0.00205971
ENSMUSG00000030208.15	Emp1	81.525	1.13062	0.578925	-1.95296	0.0508244	0.449723	0.62852	0.542948	-1.00003	1.03694	0.100554	1.84033
ENSMUSG00000040170.13	Fmo2	12.6667	2.26906	1.16271	-1.95152	0.0509954	0.449973	-3.25634	-1.44672	-0.887923	1.44525	-2.47101	0.406024
ENSMUSG00000007872.3	Id3	602.226	0.497283	0.2549	-1.9509	0.0510695	0.449973	0.921902	0.972131	1.37312	1.52123	1.36941	1.69669
ENSMUSG00000037487.7	Ubr5	3105.51	-0.371923	0.190712	1.95018	0.0511546	0.449973	-0.549136	-1.01767	-0.629489	-1.08693	-1.02397	-1.48278
ENSMUSG00000034435.6	Tmem30b	30.0705	0.992921	0.50885	-1.9513	0.0510211	0.449973	0.279828	-0.020445	0.3908	1.04454	1.03582	1.34671
ENSMUSG00000028047.11	Thbs3	105.706	-0.828123	0.424167	1.95235	0.0508965	0.449973	0.908428	0.212061	-0.307479	-1.09463	-0.336855	-0.133893
ENSMUSG00000062691.10	Cebpzos	233.818	0.468457	0.240163	-1.95058	0.0511072	0.449973	1.33528	0.725858	0.891232	1.60841	1.29397	1.27664
ENSMUSG00000007035.15	Msh5	14.0465	2.22768	1.14228	-1.95021	0.0511512	0.449973	-2.23178	#NAME?	-3.29019	-1.96574	-2.82499	0.221763
ENSMUSG00000037872.5	Ackr1	755.794	-0.683843	0.350597	1.95051	0.0511153	0.449973	-4.13748	-4.09821	-5.73773	-5.5344	-5.26599	-5.22605
ENSMUSG00000031245.8	Hmgn5	148.301	1.01702	0.520991	-1.95208	0.0509283	0.449973	-1.97609	-1.55459	-2.90484	-0.186113	-2.1417	-1.64807
ENSMUSG00000050071.8	Bex1	489.032	-0.347848	0.17835	1.95036	0.0511328	0.449973	1.14691	0.844059	0.682627	0.594119	0.388641	0.353773
ENSMUSG00000044496.6	2510039O18Rik	293.759	0.525353	0.269515	-1.94925	0.0512652	0.450179	-0.140873	-0.0482546	0.0652779	0.379246	0.00661074	0.746156
ENSMUSG00000020940.13	1700023F06Rik	75.8525	0.844273	0.433263	-1.94864	0.0513385	0.450179	2.14242	1.65593	1.88437	2.77856	1.68282	3.394
ENSMUSG00000036634.15	Mag	10978.9	0.399752	0.205136	-1.94872	0.051329	0.450179	1.88353	1.91235	2.14436	2.36899	2.17285	2.35855
ENSMUSG00000039738.16	Slx4	405.962	-0.545933	0.280018	1.94964	0.0512196	0.450179	-0.94691	-1.26108	-1.709	-1.52257	-2.15914	-2.07169
ENSMUSG00000069727.5	Zfp975	53.2731	2.28041	1.17036	-1.94847	0.0513593	0.450179	#NAME?	-3.46357	#NAME?	-2.01774	-4.37244	-3.93025
ENSMUSG00000023953.9	Polh	162.167	-0.752122	0.385899	1.94901	0.0512938	0.450179	0.540468	0.591876	-0.024178	-0.295034	0.187705	-1.38968
ENSMUSG00000026834.13	Acvr1c	228.561	-0.905218	0.465223	1.94577	0.0516822	0.45084	-1.1908	-0.759219	-1.62762	-1.90605	-3.47526	-1.58067
ENSMUSG00000027087.11	Itgav	1542.48	0.316583	0.162587	-1.94716	0.0515157	0.45084	1.58769	1.27851	1.19997	1.54892	1.53008	1.67113
ENSMUSG00000020894.16	Vamp2	7774.1	0.458492	0.235692	-1.94531	0.0517381	0.45084	-0.827614	-0.87709	-0.453107	-0.624854	-0.228278	-0.119999
ENSMUSG00000034117.3	Ptgdr2	4.50369	-3.60602	1.85465	1.94431	0.0518583	0.45084	6.19644	2.07905	4.52704	-1.55799	-0.0829619	0.591735
ENSMUSG00000048583.16	Igf2	1473.42	0.907104	0.466332	-1.94519	0.0517521	0.45084	4.69607	5.24801	4.92078	5.86899	4.96828	6.23809
ENSMUSG00000030109.15	Slc6a12	99.1114	0.796438	0.409588	-1.94448	0.0518371	0.45084	0.755002	0.0674672	0.391502	0.444143	1.51613	1.56849
ENSMUSG00000027574.15	Nkain4	808.881	0.672706	0.345983	-1.94433	0.0518552	0.45084	1.54235	2.36657	1.65327	2.15493	1.982	3.07129
ENSMUSG00000033105.12	Lss	601.336	-0.375458	0.192995	1.94543	0.0517232	0.45084	-0.525031	-0.617183	-0.0893535	-1.04916	-0.812153	-0.731398
ENSMUSG00000087651.3	1500009L16Rik	52.5305	0.935399	0.481039	-1.94454	0.0518302	0.45084	-0.779766	-1.64027	-1.19373	-1.02632	-0.459211	0.218487
ENSMUSG00000031864.16	Ints10	867.746	0.336667	0.173141	-1.94447	0.0518389	0.45084	-0.419507	-0.62582	-0.365531	-0.153216	-0.257631	-0.221429
ENSMUSG00000028040.7	Efna4	9.55698	-1.89948	0.975839	1.94651	0.0515938	0.45084	2.30972	2.65438	1.35835	-0.671228	-0.254543	1.3138
ENSMUSG00000017999.16	Ddx27	435.781	-0.381528	0.196188	1.9447	0.0518107	0.45084	0.269838	0.175561	-0.113349	-0.106899	-0.630917	-0.362525
ENSMUSG00000095845.3	Gm5741	4.04543	-4.26398	2.19132	1.94585	0.051673	0.45084	#NAME?	3.41969	#NAME?	#NAME?	#NAME?	1.05519
ENSMUSG00000021260.8	Hhipl1	49.4072	-1.18912	0.611714	1.94392	0.0519054	0.450987	1.64059	1.47028	0.297074	-1.16469	-0.0524245	0.68509
ENSMUSG00000091636.2	Akain1	392.307	0.524666	0.269952	-1.94355	0.0519495	0.451107	-1.31065	-1.91179	-0.819821	-1.19982	-0.778641	-0.607843
ENSMUSG00000096330.8	Gm21976	5.03141	-3.20135	1.64803	1.94253	0.0520727	0.45165	3.04518	#NAME?	#NAME?	#NAME?	-0.957203	#NAME?
ENSMUSG00000022451.12	Twf1	821.772	-0.512233	0.263664	1.94275	0.0520467	0.45165	-0.144884	0.317103	-0.767264	-0.735323	-0.708996	-0.817029
ENSMUSG00000102440.1	Pcdhga9	141.601	0.587153	0.302373	-1.94181	0.0521595	0.451651	1.60583	0.994477	1.15965	1.69992	1.79498	1.83845
ENSMUSG00000028036.6	Ptgfr	24.7352	1.48954	0.767102	-1.94178	0.0521637	0.451651	#NAME?	-1.16951	-2.11517	-0.623029	-1.14046	-0.655944
ENSMUSG00000040423.10	Rc3h1	815.041	-0.693577	0.357176	1.94184	0.0521569	0.451651	-1.89994	-1.58817	-2.90247	-3.12834	-2.54127	-2.79792
ENSMUSG00000020267.6	Hint1	2158.86	0.440155	0.226728	-1.94133	0.052218	0.451858	1.44876	1.15399	1.29889	1.52492	1.44436	2.00675
ENSMUSG00000030056.8	Isy1	149.64	1.14994	0.592449	-1.94099	0.0522591	0.451951	-4.72434	#NAME?	-3.61343	-2.61162	-4.73888	-3.33019
ENSMUSG00000039347.7	Atp6v0e2	3171.65	0.731417	0.376985	-1.94017	0.0523587	0.452288	-1.25978	-0.789042	-0.119903	-0.468386	-0.0681032	0.512612
ENSMUSG00000048174.2	Tmem81	38.4657	2.50653	1.29234	-1.93952	0.052438	0.45271	-4.1191	#NAME?	#NAME?	-4.04951	-2.13119	-4.03407
ENSMUSG00000041245.13	Wnk3	366.369	-0.527613	0.272589	1.93556	0.0529218	0.452725	-0.608122	-1.74203	-1.21346	-2.00138	-1.54856	-1.78111
ENSMUSG00000038255.6	Neurod2	1175.66	0.529337	0.273132	-1.93803	0.0526198	0.452725	-0.609013	-0.118324	-0.166929	0.026623	0.308662	0.177581
ENSMUSG00000032757.6	Bet1	339.476	0.55029	0.284187	-1.93636	0.0528231	0.452725	-0.511815	-1.03666	-0.630545	-0.0353251	-0.113897	-0.69053
ENSMUSG00000054793.8	Cadm4	4952.58	0.551532	0.284548	-1.93827	0.0525901	0.452725	0.36704	0.570991	0.776663	0.491886	0.82346	1.64618
ENSMUSG00000048874.15	Phf3	1443.56	-0.607304	0.313544	1.9369	0.0527571	0.452725	-0.563627	-0.525985	-0.944148	-0.867777	-1.29339	-2.0316
ENSMUSG00000024817.13	Uhrf2	636.616	-0.545759	0.281951	1.93565	0.0529103	0.452725	-0.388836	-0.57717	-0.959701	-0.702094	-1.4171	-1.73997
ENSMUSG00000042446.16	Zmym4	1009.35	-0.433958	0.223891	1.93826	0.0525918	0.452725	-0.195368	-0.808648	-0.647019	-1.08249	-0.769705	-1.38587
ENSMUSG00000034201.13	Gas2l1	184.122	0.707882	0.365697	-1.93571	0.0529035	0.452725	-1.23093	-1.85561	-1.03172	-1.52567	-0.734878	-0.160026
ENSMUSG00000031772.17	Cntnap4	1122.27	0.296409	0.153104	-1.936	0.0528676	0.452725	1.13279	1.10812	1.04791	1.45684	1.32269	1.09741
ENSMUSG00000034940.15	Synrg	1682.67	-0.36647	0.18914	1.93756	0.0526774	0.452725	0.54389	0.575773	0.67884	0.294808	0.288762	-0.189518
ENSMUSG00000063972.13	Nr6a1	60.4755	-1.94356	1.00347	1.93683	0.0527656	0.452725	-1.57376	#NAME?	-5.10975	-5.89052	-5.15257	-5.52408
ENSMUSG00000042655.5	Shisal2b	4.82924	-4.33999	2.24172	1.93601	0.0528667	0.452725	4.61148	4.50033	#NAME?	1.25148	#NAME?	#NAME?
ENSMUSG00000030789.9	Itgax	19.9	-2.93331	1.51372	1.93781	0.0526463	0.452725	5.61148	#NAME?	4.60587	0.509565	-3.6659	0.582644
ENSMUSG00000028848.13	Gpn2	140.623	0.74767	0.386386	-1.93503	0.0529865	0.452984	-0.113488	0.539197	1.3559	0.878978	1.69001	1.30186
ENSMUSG00000002289.16	Angptl4	89.4096	1.01177	0.522996	-1.93457	0.0530434	0.453211	1.96333	0.332883	1.43522	1.78339	1.79531	2.92958
ENSMUSG00000024908.15	Ppp6r3	1885.93	-0.363851	0.188152	1.93382	0.0531355	0.453738	-0.26161	-0.262684	-0.643136	-0.664386	-0.743698	-1.12867
ENSMUSG00000001741.12	Il16	2148.9	-0.558779	0.289044	1.9332	0.0532122	0.453888	-0.0166606	0.173657	-0.574604	-0.638616	-1.02903	-0.659946
ENSMUSG00000036446.5	Lum	192.196	1.08777	0.562829	-1.93269	0.0532749	0.453888	-0.515306	1.31659	1.17308	2.76016	0.609337	1.18021
ENSMUSG00000039145.16	Camk1d	732.624	-0.530783	0.274606	1.93289	0.0532499	0.453888	-1.79891	-0.932468	-1.20002	-2.1604	-1.55413	-2.04835
ENSMUSG00000040490.4	Lrfn2	75.8903	-0.924809	0.478465	1.93287	0.0532527	0.453888	3.31032	2.25561	1.61939	0.575292	1.53066	1.89285
ENSMUSG00000017764.2	Zswim1	344.649	-0.568161	0.294033	1.93231	0.0533218	0.454028	0.913656	1.41107	1.67464	0.717635	0.814742	0.633869
ENSMUSG00000047459.14	Dynlrb1	1927	0.374056	0.193606	-1.93205	0.0533532	0.454035	1.77062	1.63743	1.57562	2.18875	1.85487	1.74357
ENSMUSG00000042423.9	Fbrs	625.98	-0.450772	0.233439	1.93101	0.0534817	0.454141	-0.341023	-0.00111244	-0.190197	-1.08925	-0.907979	-0.224135
ENSMUSG00000032041.15	Tirap	30.5287	-1.79734	0.930802	1.93096	0.0534875	0.454141	-1.09551	#NAME?	-2.40139	#NAME?	-3.50236	-3.62814
ENSMUSG00000070394.10	Tmem256	799.901	0.531294	0.27505	-1.93163	0.0534053	0.454141	2.06776	2.4274	1.70353	2.21061	2.22626	2.97021
ENSMUSG00000054034.10	Tceal5	363.932	0.652539	0.337855	-1.93142	0.0534314	0.454141	-0.52345	-0.583216	-0.737115	0.338405	0.0230362	-0.8304
ENSMUSG00000038418.7	Egr1	1006.01	-0.69394	0.359701	1.92921	0.0537046	0.454689	1.35873	0.439021	1.0913	-0.260533	0.772723	0.110279
ENSMUSG00000036893.17	Ehmt1	679.039	-0.349441	0.181104	1.92951	0.0536676	0.454689	-0.306951	-0.230385	-0.481259	-1.01688	-0.627771	-0.748479
ENSMUSG00000071324.11	Armc2	43.5652	1.34117	0.695107	-1.92944	0.053676	0.454689	-4.07146	-1.03043	-0.682791	0.428816	-0.797151	-0.81661
ENSMUSG00000003380.11	Rabac1	3101.4	0.460208	0.238462	-1.9299	0.053619	0.454689	1.93649	2.23937	2.69572	2.49535	2.53164	2.98184
ENSMUSG00000023913.17	Pla2g7	9479.6	0.393355	0.20381	-1.93001	0.0536055	0.454689	1.40859	1.55792	1.2424	1.96492	1.47849	1.65369
ENSMUSG00000023852.14	Chd1	486.877	-0.608437	0.315438	1.92886	0.053748	0.454739	-0.796623	-1.63185	-1.3627	-1.49397	-1.84298	-2.47785
ENSMUSG00000023931.5	Efhb	10.9144	2.46093	1.27597	-1.92867	0.0537715	0.454739	-1.81069	#NAME?	-1.13668	0.71673	-0.243179	0.340177
ENSMUSG00000075304.2	Sp5	61.8866	0.816893	0.423715	-1.92793	0.0538635	0.455258	0.98446	-0.5745	0.989807	0.984511	1.51967	1.55518
ENSMUSG00000021892.14	Sh3bp5	1616.33	-0.300338	0.155833	1.92731	0.0539411	0.455656	0.0741523	0.189107	-0.00297547	-0.240041	-0.374963	-0.295894
ENSMUSG00000052676.16	Zmat1	188.234	-0.615294	0.319316	1.92691	0.0539906	0.455815	-0.616448	-0.168123	-0.780269	-0.792619	-1.03892	-2.08753
ENSMUSG00000021488.8	Nsd1	2952.01	-0.447019	0.232436	1.92319	0.054456	0.456866	-0.86729	-1.16738	-1.43026	-1.5958	-1.44288	-2.00245
ENSMUSG00000056073.16	Grik2	2098.15	-0.513909	0.267423	1.92171	0.0546429	0.456866	-0.678206	-0.382061	-1.55289	-1.39085	-1.6646	-1.27391
ENSMUSG00000034457.10	Eda2r	20.814	-1.75604	0.915603	1.91791	0.0551226	0.456866	-2.31019	0.897759	#NAME?	-2.27149	-2.06777	-2.49015
ENSMUSG00000025656.17	Arhgef9	2212.27	-0.328092	0.170807	1.92083	0.0547532	0.456866	-1.98173	-2.15174	-2.4353	-2.6138	-2.39994	-2.85207
ENSMUSG00000050288.6	Fzd2	100.662	0.881839	0.458859	-1.92181	0.0546299	0.456866	1.25678	1.06155	0.824532	1.4927	1.09034	2.76122
ENSMUSG00000074971.4	Fibin	121.782	0.849074	0.4428	-1.91751	0.0551728	0.456866	-0.0435162	-0.544601	-0.658772	0.660723	-0.122512	0.402604
ENSMUSG00000060657.8	Marf1	1308.37	-0.80791	0.420531	1.92117	0.0547109	0.456866	-1.55651	-1.32785	-3.02113	-2.67939	-2.94965	-2.5086
ENSMUSG00000020713.6	Gh	4.16021	-5.76226	2.99636	1.92309	0.0544688	0.456866	1.93043	7.88561	#NAME?	#NAME?	#NAME?	#NAME?
ENSMUSG00000071757.10	Zhx2	359.511	-0.542217	0.281752	1.92445	0.0542988	0.456866	-0.256967	0.201876	-0.294709	-0.523523	-1.28414	-0.454342
ENSMUSG00000002983.17	Relb	50.1859	-0.967645	0.504425	1.91831	0.0550716	0.456866	1.79103	1.3171	1.33447	-0.480521	0.431694	1.1195
ENSMUSG00000033107.6	Rnf125	9.99715	2.70773	1.40624	-1.92551	0.0541651	0.456866	-2.21318	#NAME?	#NAME?	-2.45124	-1.24002	-0.223625
ENSMUSG00000045394.9	Epcam	14.0026	2.04896	1.06862	-1.91739	0.0551882	0.456866	0.0774534	#NAME?	1.35835	1.08711	2.37853	4.05224
ENSMUSG00000037447.16	Arid5a	168.043	0.707455	0.367531	-1.92489	0.0542435	0.456866	-1.90571	-0.828829	-0.329863	-0.0153266	-0.782159	-0.185531
ENSMUSG00000063568.11	Jazf1	287.025	-0.654047	0.34025	1.92225	0.0545738	0.456866	0.101364	0.88791	-0.262367	-0.422215	-0.432763	-0.483267
ENSMUSG00000025369.15	Smarcc2	3850.06	-0.270865	0.141165	1.91878	0.0550127	0.456866	-0.433914	-0.196292	-0.352625	-0.630935	-0.642015	-0.793746
ENSMUSG00000028221.3	Pip4p2	820.49	-0.362722	0.188943	1.91974	0.0548909	0.456866	0.654524	0.897259	0.423349	0.353284	0.294754	-0.0495884
ENSMUSG00000035493.10	Tgfbi	155.689	0.94104	0.489459	-1.92261	0.0545287	0.456866	0.444617	1.68578	0.697008	2.29303	0.761177	1.92591
ENSMUSG00000040177.10	2310057M21Rik	406.725	-0.452143	0.235597	1.91914	0.0549672	0.456866	0.248857	0.512784	-0.232162	-0.0399014	-0.38243	-0.632312
ENSMUSG00000058709.11	Egln2	613.628	0.46324	0.240861	-1.92327	0.0544465	0.456866	-1.70119	-1.94459	-1.43702	-1.62721	-1.32602	-1.00492
ENSMUSG00000110086.1	Gm45623	6.11629	2.74079	1.42705	-1.9206	0.0547825	0.456866	#NAME?	#NAME?	0.286356	1.30212	2.53332	1.73031
ENSMUSG00000000876.11	Pxmp4	254.788	0.485246	0.252637	-1.92072	0.0547669	0.456866	0.226289	0.428881	1.05236	0.76477	1.09634	1.10883
ENSMUSG00000045128.9	Rpl18a	1040.94	0.447423	0.233077	-1.91964	0.054904	0.456866	-0.968491	-1.07973	-0.817803	-0.501714	-0.946605	-0.402735
ENSMUSG00000042096.15	Dao	904.212	0.467035	0.243146	-1.9208	0.0547567	0.456866	0.65138	1.26806	0.966301	1.33993	1.38611	1.36635
ENSMUSG00000032386.15	Trip4	813.553	-0.411663	0.214652	1.91781	0.0551345	0.456866	-0.790227	-0.456184	-0.72367	-0.791759	-1.12411	-1.58394
ENSMUSG00000067586.4	S1pr3	70.1427	1.11745	0.580697	-1.92432	0.054314	0.456866	-0.610751	-2.61854	-1.78669	-0.3547	-0.581128	-0.533151
ENSMUSG00000034683.12	Ppp1r1c	3.53332	-4.86986	2.52974	1.92505	0.0542235	0.456866	4.61148	#NAME?	4.52704	#NAME?	0.573667	#NAME?
ENSMUSG00000038400.15	Pmepa1	235.387	0.723687	0.377167	-1.91875	0.0550166	0.456866	-0.971045	-1.28082	-0.220121	-0.209731	-0.710141	0.508049
ENSMUSG00000034022.8	Cpsf1	776.114	-0.383357	0.199163	1.92484	0.0542495	0.456866	0.309064	0.229708	-0.12647	-0.579405	-0.514421	0.0511128
ENSMUSG00000032366.15	Tpm1	1815.05	0.339983	0.177188	-1.91878	0.0550126	0.456866	-0.331715	-0.489512	-0.661471	0.0524429	-0.417488	-0.419041
ENSMUSG00000007033.4	Hspa1l	18.3106	2.61526	1.36339	-1.9182	0.0550851	0.456866	-3.24411	#NAME?	#NAME?	-3.58017	-1.65226	-2.24849
ENSMUSG00000027952.16	Pmvk	433.566	0.47565	0.247363	-1.92288	0.0544953	0.456866	0.125446	-0.636073	-0.325619	-0.0596472	0.285571	0.156274
ENSMUSG00000001151.10	Pcnt	684.057	-0.392031	0.204529	1.91675	0.0552694	0.457284	-0.286231	-0.598795	-0.488425	-1.19866	-0.933297	-0.740459
ENSMUSG00000028100.11	Nudt17	50.7956	-1.04491	0.545292	1.91624	0.0553345	0.457569	2.86671	2.27902	1.17455	0.129094	1.06717	1.37548
ENSMUSG00000020689.4	Itgb3	61.6833	0.861167	0.449531	-1.9157	0.0554035	0.457885	-0.924689	-1.71832	0.00892177	-0.127577	0.161181	-0.14239
ENSMUSG00000002416.13	Ndufb2	1639	0.495098	0.258812	-1.91297	0.0557525	0.458629	1.89751	1.58942	2.02008	2.46634	1.87145	2.39191
ENSMUSG00000037503.12	Fam168b	3896.9	-0.382698	0.199902	1.91443	0.0555658	0.458629	-1.28826	-0.812808	-1.32457	-1.69801	-1.529	-1.56283
ENSMUSG00000030577.14	Cd22	4.21232	-4.19771	2.19435	1.91297	0.0557522	0.458629	#NAME?	#NAME?	4.52704	0.491826	-0.595231	0.936308
ENSMUSG00000024742.15	Fen1	173.866	0.698625	0.36507	-1.91367	0.0556618	0.458629	3.92291	3.93066	4.5886	5.34475	4.5897	4.48976
ENSMUSG00000051285.17	Pcmtd1	1873.32	-0.395536	0.206625	1.91427	0.0555855	0.458629	-1.00736	-1.0471	-1.58203	-1.57106	-1.51786	-2.00657
ENSMUSG00000030930.14	Chst15	407.324	0.442647	0.23141	-1.91282	0.0557705	0.458629	-0.758659	-0.815331	-0.74497	-0.195136	-0.497329	-0.616516
ENSMUSG00000056947.5	Mab21l1	647.519	-0.322972	0.168829	1.91301	0.0557466	0.458629	0.72701	0.893358	0.731843	0.227651	0.278254	0.60245
ENSMUSG00000032181.7	Scg3	7929.3	0.343674	0.179655	-1.91296	0.0557527	0.458629	0.601326	0.804405	0.378141	1.05589	0.762584	0.726527
ENSMUSG00000047085.14	Lrrc4b	1259.56	0.50763	0.265243	-1.91383	0.0556417	0.458629	0.494308	0.304448	0.816387	0.579974	1.01356	1.20005
ENSMUSG00000046792.8	Zfp787	211.627	0.432275	0.226026	-1.9125	0.0558121	0.458718	0.0397425	0.0399538	0.266548	0.140423	0.59597	0.625454
ENSMUSG00000040097.16	Flywch1	2198.11	-0.365877	0.191344	1.91214	0.0558584	0.45874	0.413793	0.218222	0.206774	-0.59754	0.132349	-0.12578
ENSMUSG00000026608.13	Kctd3	1006.35	-0.360335	0.188493	1.91166	0.0559195	0.458842	-0.667735	-1.07533	-1.00119	-1.62105	-1.09418	-1.39111
ENSMUSG00000041781.9	Cpsf2	1137.74	-0.310647	0.162546	1.91113	0.0559879	0.45915	0.271295	-0.127634	-0.0773858	-0.232983	-0.368683	-0.530051
ENSMUSG00000068747.14	Sort1	3984.24	0.319159	0.167066	-1.91038	0.0560842	0.459687	0.129368	-0.00573785	0.434784	0.415899	0.514516	0.320936
ENSMUSG00000000142.15	Axin2	296.267	-0.519265	0.271899	1.90977	0.0561626	0.460076	0.0663236	-0.149065	-0.986907	-1.1771	-0.90667	-0.829843
ENSMUSG00000028164.15	Manba	371.977	0.531748	0.278613	-1.90855	0.0563196	0.460856	0.169743	0.785192	0.702945	1.3245	1.04909	0.487122
ENSMUSG00000035473.10	Galm	48.8442	1.10676	0.580051	-1.90805	0.056385	0.460977	-1.35907	-0.979972	-0.276335	0.647044	-0.331516	-0.00145551
ENSMUSG00000092074.2	Dynlt1a	53.8517	-1.56883	0.822256	1.90796	0.0563963	0.460977	-2.36941	-2.07033	-5.00962	-3.34448	#NAME?	-4.18706
ENSMUSG00000009734.18	Pou6f2	7.33276	-2.38477	1.25069	1.90676	0.0565518	0.461378	#NAME?	1.21871	4.30023	-0.241021	-1.06135	0.0599838
ENSMUSG00000060679.14	Mrps9	424.867	0.37033	0.194173	-1.90722	0.0564922	0.461378	-0.11048	-0.137722	-0.0357184	0.184841	0.187986	0.193609
ENSMUSG00000028487.18	Bnc2	27.7475	-1.12892	0.59209	1.90666	0.0565642	0.461378	0.761947	1.96788	0.751087	-0.199043	-1.05207	0.909678
ENSMUSG00000001054.9	Rmnd5b	596.741	0.355748	0.186585	-1.90662	0.0565692	0.461378	0.184652	0.0887823	0.419258	0.169348	0.691601	0.584646
ENSMUSG00000032363.15	Adamts7	10.6207	-2.26083	1.1861	1.90611	0.0566365	0.461422	-1.59661	3.05447	#NAME?	-1.41917	-1.57016	-1.64645
ENSMUSG00000062151.13	Unc13c	2268.51	-0.501101	0.262879	1.9062	0.0566237	0.461422	-1.47664	-1.55573	-2.11651	-2.52867	-2.28022	-2.06401
ENSMUSG00000029110.13	Rnf4	922.912	-0.344329	0.180809	1.90438	0.0568603	0.461866	-0.940055	-1.08456	-1.4621	-1.45785	-1.57841	-1.73928
ENSMUSG00000033722.9	BC034090	111.606	-0.661877	0.347602	1.90412	0.0568945	0.461866	-0.938043	-0.842801	-1.82754	-1.96859	-1.8621	-1.86845
ENSMUSG00000028078.14	Dclk2	1398.77	-0.383762	0.201457	1.90493	0.0567886	0.461866	-0.667899	-0.172624	-0.723346	-1.26591	-0.760782	-0.942714
ENSMUSG00000002343.11	Armc6	416.488	-0.464091	0.24357	1.90537	0.0567316	0.461866	1.53972	1.28494	0.70551	0.392187	0.61968	0.758259
ENSMUSG00000031021.13	Tmem9b	1254.66	0.448728	0.235674	-1.90402	0.056908	0.461866	0.257896	0.187953	-0.338407	-0.00104866	0.307921	0.771144
ENSMUSG00000074582.10	Arfgef2	1248.26	-0.328444	0.172414	1.90497	0.0567835	0.461866	0.126331	-0.0510586	0.191873	-0.478989	-0.169257	-0.353749
ENSMUSG00000022269.13	March11	139.741	0.558981	0.293829	-1.90241	0.0571181	0.463319	1.03768	0.608	1.09051	1.15149	1.74603	1.24695
ENSMUSG00000035620.15	Ric8b	612.169	-0.361647	0.190133	1.90208	0.0571613	0.463417	-0.230518	-0.333471	-0.818133	-1.02076	-0.790651	-0.940031
ENSMUSG00000053510.12	Nrd1	2003.29	-0.356474	0.187621	1.89997	0.0574373	0.465148	-0.230181	-0.590818	-0.621846	-0.681019	-0.929512	-1.1811
ENSMUSG00000015357.10	Clpx	797.705	-0.45214	0.238035	1.89947	0.057503	0.465428	0.557628	0.438455	0.462712	0.0230534	0.242303	-0.5726
ENSMUSG00000026840.14	Lamc3	272.448	0.725688	0.38214	-1.89901	0.0575631	0.465661	1.13066	1.22669	2.03974	2.63928	1.95869	1.47422
ENSMUSG00000049470.13	Aff4	3930.69	-0.428011	0.225624	1.89701	0.0578264	0.467369	-0.934135	-1.3096	-1.43803	-1.54089	-1.60076	-2.09205
ENSMUSG00000015461.15	Atf6b	1142.29	0.410711	0.216593	-1.89623	0.0579291	0.46786	0.492967	0.599111	0.477215	0.729716	0.505614	1.22796
ENSMUSG00000051067.8	Lingo3	1628.97	0.640803	0.338011	-1.89581	0.0579853	0.46806	0.41892	0.0597765	1.33938	0.874264	1.39494	1.33875
ENSMUSG00000016494.9	Cd34	655.646	0.828905	0.437327	-1.89539	0.0580409	0.468159	0.473588	-0.202358	0.106084	1.66614	0.574559	0.218247
ENSMUSG00000019916.14	P4ha1	657.97	0.569135	0.300297	-1.89524	0.0580604	0.468159	0.481414	0.995211	0.175581	1.62354	0.533115	0.915097
ENSMUSG00000047658.6	Gal3st3	1186.22	0.580238	0.306199	-1.89497	0.0580962	0.468195	1.45539	1.61711	2.32294	1.67338	2.53672	2.61102
ENSMUSG00000040009.6	Gnaz	440.959	-0.466439	0.246348	1.89342	0.0583022	0.46903	0.210317	0.441276	0.420751	-0.472828	0.000871824	-0.206325
ENSMUSG00000090461.2	Iltifb	144.796	1.5683	0.82837	-1.89324	0.0583262	0.46903	-4.57778	#NAME?	-6.17728	-5.2648	-3.3157	-5.82711
ENSMUSG00000068290.11	Ddrgk1	923.199	0.385116	0.203391	-1.89348	0.0582944	0.46903	0.611706	0.629197	0.59376	0.961541	0.576537	1.1523
ENSMUSG00000090061.9	Nwd2	304.851	0.651405	0.343985	-1.8937	0.0582648	0.46903	-0.271507	-1.16751	-1.3384	-0.350698	-0.0140672	-0.752311
ENSMUSG00000019578.11	Ubxn6	698.166	0.298614	0.157746	-1.893	0.0583573	0.46903	2.02383	2.04538	1.925	2.12909	2.16268	2.32399
ENSMUSG00000026421.14	Csrp1	2705.04	0.379714	0.200635	-1.89256	0.0584158	0.469248	0.268441	0.121797	0.163672	0.36866	0.106114	0.894659
ENSMUSG00000052423.14	B4galt3	359.022	0.562776	0.297515	-1.89159	0.0585453	0.469276	-0.0189627	-0.0680275	0.640143	0.66125	0.344288	1.01734
ENSMUSG00000040147.14	Maob	275.473	0.577771	0.305348	-1.89217	0.058468	0.469276	0.0896749	-0.509441	-0.279306	0.612878	-0.361416	0.608075
ENSMUSG00000027751.13	Supt20	634.469	-0.469542	0.248187	1.89189	0.0585061	0.469276	-0.512249	-0.596928	-1.6589	-1.52649	-1.41289	-1.36833
ENSMUSG00000045932.12	Ifit2	119.456	-0.844987	0.446684	1.89169	0.0585324	0.469276	0.477443	-0.702265	-0.117396	-0.883423	-0.591074	-1.87241
ENSMUSG00000026873.9	Phf19	26.0991	-1.27802	0.675768	1.89121	0.058597	0.469297	-0.115799	0.0994762	-1.24232	-1.62303	-2.58769	-0.987962
ENSMUSG00000001829.17	Clpb	588.793	-0.414906	0.219399	1.8911	0.0586109	0.469297	-0.0444186	0.456974	-0.22118	-0.376034	-0.339987	-0.543851
ENSMUSG00000036890.13	Gtdc1	268.015	-0.580952	0.307242	1.89086	0.0586431	0.469302	-0.827695	-0.428322	-1.34324	-1.44696	-1.29009	-1.8648
ENSMUSG00000026971.15	Itgb6	20.7022	1.50146	0.794323	-1.89024	0.058726	0.469462	0.791026	1.04262	0.674671	2.6305	2.31166	1.85496
ENSMUSG00000022565.15	Plec	1590.51	-0.382163	0.202166	1.89034	0.0587122	0.469462	0.294696	0.0921094	0.240342	-0.473588	-0.170936	-0.169178
ENSMUSG00000063234.5	Gpr84	9.03973	2.73339	1.44683	-1.88923	0.0588609	0.470288	-0.653452	#NAME?	0.117967	0.755448	1.99179	3.84579
ENSMUSG00000020705.6	Ddx42	1650.98	-0.378293	0.200282	1.8888	0.0589186	0.470496	0.0219538	-0.374824	-0.315282	-0.425641	-0.734869	-0.926514
ENSMUSG00000025156.17	Gps1	1141.61	-0.270717	0.143488	1.88668	0.0592035	0.470753	-0.134988	0.221417	-0.0144129	-0.494065	-0.326927	-0.191643
ENSMUSG00000030491.16	Tdrd12	7.95139	-2.16609	1.14793	1.88696	0.0591657	0.470753	1.01735	1.34984	-0.565874	#NAME?	-0.98678	-0.896729
ENSMUSG00000021028.8	Mbip	311.078	-0.428095	0.226749	1.88797	0.0590298	0.470753	-0.124513	-0.293731	-0.444309	-0.685817	-0.905115	-0.837047
ENSMUSG00000090071.4	Cdk5r2	1348.34	0.687222	0.364193	-1.88697	0.0591645	0.470753	0.768395	0.873287	1.34971	1.02735	1.68885	2.0387
ENSMUSG00000002014.12	Ssr4	906.794	0.384723	0.203869	-1.88711	0.0591455	0.470753	1.64374	1.97171	1.87524	1.83951	1.94776	2.54486
ENSMUSG00000028517.8	Plpp3	4453.24	0.468405	0.248264	-1.88672	0.0591976	0.470753	0.113876	0.650862	0.543452	0.590553	0.684306	1.16822
ENSMUSG00000014039.18	Prdm15	205.902	-0.557982	0.295589	1.88769	0.0590673	0.470753	-0.794623	-0.371738	-1.63784	-1.25607	-1.71981	-1.6356
ENSMUSG00000026153.15	Fam135a	964.761	-0.450715	0.238933	1.88636	0.0592464	0.470843	-0.954382	-1.07128	-1.61456	-2.06462	-1.6386	-1.55127
ENSMUSG00000040693.7	Slco4c1	22.1621	1.55507	0.825166	-1.88456	0.0594898	0.471289	-0.486601	#NAME?	-1.64513	-0.0659467	-0.015762	0.345424
ENSMUSG00000054199.17	Gon4l	452.445	-0.425656	0.225913	1.88416	0.0595431	0.471289	-0.940336	-1.66963	-1.16344	-1.89946	-1.80081	-1.5212
ENSMUSG00000035529.10	Prdm4	300.694	-0.513995	0.272736	1.88459	0.0594852	0.471289	-1.41139	-2.23141	-2.23965	-2.74787	-2.49189	-2.40226
ENSMUSG00000072501.5	Phf20l1	1559.75	-0.382582	0.202987	1.88477	0.0594615	0.471289	-1.94658	-2.14675	-2.76567	-2.61432	-2.68402	-2.99622
ENSMUSG00000067851.11	Arfgef1	2534.37	-0.375023	0.198896	1.88552	0.0593597	0.471289	-0.00498182	-0.280095	-0.465479	-0.613651	-0.487153	-1.06339
ENSMUSG00000038664.16	Herc1	3542.21	-0.490782	0.260486	1.8841	0.0595514	0.471289	-0.126273	-0.979288	-0.68101	-1.14484	-0.914577	-1.39447
ENSMUSG00000031377.11	Bmx	29.23	-1.16185	0.616671	1.88407	0.0595556	0.471289	0.472473	1.16839	2.33974	0.988781	-0.375488	-0.352886
ENSMUSG00000030826.19	Bcat2	197.585	0.549834	0.291884	-1.88374	0.0596	0.471374	-0.538531	-0.0556645	-0.6362	-0.26671	0.257302	0.0642164
ENSMUSG00000066440.5	Zfyve26	437.871	-0.652656	0.346508	1.88352	0.0596296	0.471374	-0.808141	-0.370088	-0.986595	-1.77137	-1.62714	-1.02461
ENSMUSG00000052917.15	Senp7	678.982	-0.474649	0.252069	1.88301	0.0596985	0.471669	-0.912413	-0.375264	-0.776729	-1.05854	-1.07708	-1.70863
ENSMUSG00000063524.13	Eno1	5579.92	0.293753	0.156042	-1.88253	0.0597639	0.471864	-0.688951	-0.497739	-0.232771	-0.287709	-0.309711	-0.194477
ENSMUSG00000032415.14	Ube2cbp	53.1095	-0.868542	0.46141	1.88236	0.0597866	0.471864	0.378159	1.7381	1.13788	0.32137	0.203021	0.219032
ENSMUSG00000021319.7	Sfrp4	31.4517	1.2116	0.643856	-1.88179	0.0598641	0.472226	-0.846574	-1.65465	-1.179	0.373206	-0.537499	-0.0584484
ENSMUSG00000020974.6	Pole2	15.5431	1.99909	1.06352	-1.87969	0.0601507	0.474236	-1.67156	#NAME?	-0.72959	0.460646	-1.01576	0.142401
ENSMUSG00000061393.14	Acvr2b	74.1306	-1.10507	0.588036	1.87926	0.0602093	0.474447	-0.430226	0.995085	-0.796276	-1.53854	-1.06541	-0.748916
ENSMUSG00000040462.13	Os9	2467.17	0.339836	0.180926	-1.87832	0.0603378	0.474957	0.93916	1.1119	0.914146	1.2826	1.26489	1.14013
ENSMUSG00000001783.3	Rtcb	1563.6	-0.238858	0.127222	1.87749	0.0604511	0.475477	0.66867	0.483887	0.404712	0.110192	0.203508	0.236438
ENSMUSG00000025571.13	Tnrc6c	904.612	-0.510287	0.27181	1.87737	0.0604677	0.475477	-1.29131	-1.40654	-1.91978	-2.46219	-2.00372	-1.91847
ENSMUSG00000025408.15	Ddit3	300.214	0.61311	0.32672	-1.87656	0.0605779	0.475687	-2.72747	-1.67184	-3.14101	-1.79819	-2.28036	-1.6737
ENSMUSG00000040836.15	Gpr161	112.965	-0.641117	0.341651	1.87653	0.0605827	0.475687	-0.929772	-1.17048	-1.21271	-1.92889	-1.72811	-1.84145
ENSMUSG00000024677.13	Ms4a6b	24.403	-1.36109	0.725861	1.87513	0.0607743	0.476882	0.749491	2.06251	0.944593	0.422277	-0.0728797	-0.209487
ENSMUSG00000046351.11	Zfp322a	479.787	0.479582	0.255899	-1.87411	0.0609156	0.476932	-2.93255	-2.64149	-3.15418	-2.49266	-2.54888	-2.52493
ENSMUSG00000030986.13	Dhx32	450.058	-0.449492	0.239902	1.87365	0.0609786	0.476932	0.135299	0.722629	-0.197623	-0.650985	-0.0885297	-0.218447
ENSMUSG00000039068.16	Zzz3	794.248	-0.602618	0.3217	1.87323	0.0610368	0.476932	-2.44839	-1.43082	-2.83872	-2.74669	-2.82527	-2.90899
ENSMUSG00000098132.1	Rassf10	17.2492	1.8668	0.996386	-1.87357	0.0609901	0.476932	#NAME?	#NAME?	-0.0262874	0.79599	-1.52403	0.523475
ENSMUSG00000031939.16	Taf1d	236.38	0.752945	0.401685	-1.87447	0.0608662	0.476932	-3.47238	-4.07403	-4.07204	-2.71334	-3.23353	-3.87196
ENSMUSG00000041319.14	Thoc6	169.909	0.569916	0.304161	-1.87373	0.0609678	0.476932	0.00348774	0.938202	0.807527	0.999	0.919693	1.31198
ENSMUSG00000039781.14	Cep131	273.631	-0.492926	0.26314	1.87325	0.061034	0.476932	0.20479	0.228788	0.268761	-0.895231	-0.0208201	-0.174557
ENSMUSG00000040936.15	Ulk4	49.6585	-0.914693	0.488164	1.87374	0.0609661	0.476932	1.54937	1.48169	-0.540534	-0.031042	-0.175905	0.145734
ENSMUSG00000030772.6	Dkk3	442.041	0.606163	0.323638	-1.87297	0.061073	0.476965	0.962703	-0.153586	0.455694	0.816125	0.834238	1.39382
ENSMUSG00000057236.10	Rbbp4	2722.98	-0.230459	0.123071	1.87256	0.0611288	0.477151	0.97389	1.06942	0.838826	0.718609	0.651954	0.530374
ENSMUSG00000004561.14	Mettl17	293.822	-0.518797	0.277235	1.87132	0.0613005	0.47824	-0.975984	-0.291028	-1.49503	-1.65478	-1.5321	-1.38143
ENSMUSG00000054499.9	Dedd2	279.402	0.519281	0.277636	-1.87036	0.0614332	0.478774	-1.41038	-1.30416	-0.651606	-0.721594	-0.454655	-0.790988
ENSMUSG00000037286.15	Stag1	1194.17	-0.346279	0.185163	1.87013	0.061466	0.478779	-0.733832	-0.706695	-1.22154	-1.16362	-1.25792	-1.54482
ENSMUSG00000029188.14	Slc34a2	4.38894	-4.81885	2.57856	1.86881	0.0616493	0.4798	#NAME?	3.49409	#NAME?	#NAME?	-1.45476	0.389896
ENSMUSG00000035184.15	Fam124a	126.362	-0.71044	0.380214	1.86852	0.061689	0.4798	0.189995	-0.190051	-0.941714	-1.74961	-1.3157	-0.496904
ENSMUSG00000040875.12	Osbpl10	199.057	-0.498634	0.266865	1.86849	0.0616936	0.4798	0.755593	0.241331	0.898206	-0.242127	0.0924919	0.227246
ENSMUSG00000030602.13	Pak4	157.18	0.476288	0.254944	-1.8682	0.0617336	0.47986	-0.569465	0.0937013	-0.11205	0.235841	0.239746	0.173475
ENSMUSG00000045136.6	Tubb2b	929.839	0.677737	0.362846	-1.86784	0.0617844	0.480005	-1.72196	-0.614529	-0.347048	0.0374663	-0.666397	-0.0505777
ENSMUSG00000027326.13	Knl1	12.4138	2.7218	1.4577	-1.86719	0.0618752	0.480218	#NAME?	#NAME?	#NAME?	0.412741	-0.171827	-1.3715
ENSMUSG00000000085.16	Scmh1	547.397	-0.44965	0.240822	1.86715	0.0618808	0.480218	-1.61032	-2.05213	-1.48557	-2.49848	-2.28091	-1.97701
ENSMUSG00000074218.3	Cox7a1	98.5018	0.997364	0.534221	-1.86695	0.0619085	0.480218	2.16107	0.902097	3.36948	2.63245	2.92112	3.4091
ENSMUSG00000020571.12	Pdia6	1872.68	0.455403	0.243995	-1.86645	0.061979	0.480278	1.26304	1.35855	0.609459	1.49591	0.927306	1.80962
ENSMUSG00000035401.9	Emsy	985.607	-0.474675	0.254322	1.86643	0.0619807	0.480278	-0.649122	-0.330537	-0.971997	-0.921848	-1.13663	-1.54474
ENSMUSG00000020607.7	Lratd1	526.523	0.621464	0.333059	-1.86593	0.0620511	0.480574	-0.699828	-1.29583	-0.918081	-1.35389	-0.021384	-0.108429
ENSMUSG00000083695.6	Rnf138rt1	17.9486	-1.38432	0.742027	1.86559	0.0620981	0.480688	2.48497	1.13422	0.491745	0.0183822	-0.305863	-0.248489
ENSMUSG00000027840.5	Wnt2b	52.1811	1.44384	0.774268	-1.86478	0.0622116	0.481316	-2.25263	#NAME?	-4.20194	-3.39481	-1.78924	-1.90369
ENSMUSG00000026240.12	Cops7b	234.968	0.453556	0.243286	-1.86429	0.062281	0.481354	-0.00569017	-0.647982	-0.568244	0.0922824	0.0660539	-0.247927
ENSMUSG00000032217.13	Rnf111	589.601	-0.367789	0.197267	1.86442	0.0622625	0.481354	0.176357	-0.0383878	0.00420526	-0.306032	-0.241435	-0.729635
ENSMUSG00000034832.15	Tet3	1515.9	-0.501421	0.269059	1.86361	0.0623769	0.481407	-1.66608	-2.25677	-1.62146	-2.59848	-2.2319	-2.47653
ENSMUSG00000035673.10	Sbno2	266.105	-0.513922	0.275735	1.86383	0.0623458	0.481407	-1.19923	-0.739095	-1.79847	-2.13024	-1.97938	-1.43439
ENSMUSG00000009470.17	Tnpo1	1626.49	-0.413503	0.22189	1.86355	0.0623852	0.481407	-0.971936	-1.47993	-1.01769	-1.50297	-1.68253	-1.71764
ENSMUSG00000060594.6	Layn	117.235	0.737146	0.395609	-1.86332	0.0624172	0.481407	-0.00826382	0.269748	-0.00818756	1.57017	0.072698	0.582605
ENSMUSG00000046338.4	Gpat2	11.9275	2.06015	1.10595	-1.86279	0.0624912	0.481519	0.845589	#NAME?	#NAME?	0.545708	0.893873	0.319898
ENSMUSG00000048616.4	Nog	122.349	0.73596	0.395091	-1.86276	0.0624963	0.481519	0.806799	2.07666	1.66109	1.81597	2.07877	2.78463
ENSMUSG00000028862.6	Map3k6	43.8292	0.955866	0.513212	-1.86252	0.0625302	0.481531	1.14055	0.943373	-0.14531	0.921348	1.28038	2.13779
ENSMUSG00000026620.11	Mark1	771.888	-0.411761	0.221125	1.86212	0.0625865	0.481715	-0.298584	-0.73153	-0.374611	-0.909229	-0.712442	-1.30142
ENSMUSG00000022750.18	Klhl22	1250.77	-0.361021	0.193934	1.86157	0.0626639	0.48204	0.338679	0.807939	0.62041	-0.150185	0.343202	0.20601
ENSMUSG00000044244.18	Il20rb	289.613	0.84891	0.456115	-1.86118	0.0627192	0.48204	-3.25719	-1.85913	-4.54678	-2.86742	-2.10707	-1.60837
ENSMUSG00000026628.13	Atf3	114.952	-1.39324	0.748597	1.86113	0.0627256	0.48204	-0.478421	1.10673	0.858548	-0.335939	-1.38682	-1.96825
ENSMUSG00000050587.14	Lrrc4c	454.195	-0.540019	0.290242	1.86058	0.0628037	0.482142	-0.355647	-0.448296	-1.62746	-1.56052	-1.36996	-1.2721
ENSMUSG00000025234.11	Arih1	1453.86	-0.345848	0.18588	1.8606	0.0628012	0.482142	-0.894668	-1.16135	-1.33023	-1.26118	-1.60584	-1.87113
ENSMUSG00000040713.12	Creg1	1254.47	0.412969	0.222077	-1.85957	0.0629457	0.482805	0.561374	0.552363	1.20971	0.889715	1.31647	1.13518
ENSMUSG00000054863.9	Tafa5	779.703	-0.788542	0.424059	1.85951	0.0629549	0.482805	-1.40015	-0.715367	-2.21948	-2.98954	-2.31739	-1.61665
ENSMUSG00000014959.12	Gorasp2	1360.65	-0.276348	0.148678	1.8587	0.0630696	0.482871	1.02771	0.875639	0.987894	0.458487	0.700823	0.613063
ENSMUSG00000039977.16	Deup1	8.02879	-2.7389	1.47369	1.85853	0.0630931	0.482871	5.36242	4.15541	#NAME?	-1.72468	0.188806	-0.0228781
ENSMUSG00000021120.11	Pigh	150.528	0.536336	0.288482	-1.85917	0.0630033	0.482871	0.51145	0.215428	-0.432102	0.465528	0.35158	0.784936
[truncated: 11,968 more rows]

## Sheet: TE_NMF205
gene_id	external_gene_name	baseMean	log2FoldChange	lfcSE	stat	pvalue	padj	log2_wtJ_1_TE	log2_wtJ_2_TE	log2_wtJ_3_TE	log2_NMF205_1_TE	log2_NMF205_2_TE	log2_NMF205_3_TE
ENSMUSG00000066189	Cacng3	277.871	-1.86434	0.244648	7.62051	2.52684e-14	3.68539e-10	1.33804	1.05218	0.699277	-0.839609	-0.97281	-0.909884
ENSMUSG00000093674	Rpl41	1217.06	2.01106	0.286298	-7.02434	2.15078e-12	1.56845e-08	-1.40824	-1.40696	-1.1728	1.02423	0.0438839	0.665051
ENSMUSG00000031026	Trim66	916.435	-1.73908	0.265998	6.53796	6.23642e-11	3.03194e-07	0.32526	0.29389	-0.420056	-1.59204	-1.52446	-2.05917
ENSMUSG00000037465	Klf10	361.5	-1.35401	0.221217	6.12072	9.31517e-10	2.79031e-06	0.648049	1.04966	0.504879	-0.692429	-0.506691	-0.848306
ENSMUSG00000027861	Casq2	960.405	1.16581	0.191513	-6.08736	1.14788e-09	2.79031e-06	0.367789	0.377064	0.399	1.64634	1.4462	1.32157
ENSMUSG00000070730	Rmdn3	2012.42	0.828109	0.135872	-6.09475	1.09607e-09	2.79031e-06	0.248089	0.0653904	0.11725	1.07826	0.818306	0.803393
ENSMUSG00000025739	Gng13	9257.86	1.39651	0.234816	-5.94727	2.72656e-09	5.68098e-06	3.13492	2.55696	3.10251	4.18554	4.07242	4.60425
ENSMUSG00000020255	D10Wsu102e	743.646	-1.62087	0.276778	5.85621	4.73557e-09	8.44614e-06	-2.1989	-1.8671	-2.34723	-3.63238	-3.94854	-3.88533
ENSMUSG00000052726	Kcnt2	103.366	-3.20525	0.548819	5.84026	5.21188e-09	8.44614e-06	3.40029	1.55991	0.635834	-1.22509	-1.02524	-2.18862
ENSMUSG00000036242	Armh4	3204.58	0.788301	0.139306	-5.65876	1.52468e-08	2.22374e-05	0.406391	0.407566	0.28654	0.979722	1.20633	1.05907
ENSMUSG00000045114	Prrt2	1899.99	-1.49105	0.269644	5.52968	3.20812e-08	4.25368e-05	8.47328	7.88878	7.94435	6.50151	6.40395	6.54969
ENSMUSG00000005716	Pvalb	16313.7	1.33271	0.243825	-5.46587	4.60647e-08	5.59878e-05	1.82806	1.13884	1.70922	2.79535	2.66663	3.11261
ENSMUSG00000013646	Sh3bp5l	539.731	1.17776	0.2171	-5.42495	5.79702e-08	6.50381e-05	-2.90085	-3.40142	-2.73077	-1.80078	-1.96847	-1.84859
ENSMUSG00000042396	Rbm7	472.171	-1.07229	0.198246	5.40886	6.34266e-08	6.6077e-05	-0.130433	-0.321854	-0.727577	-1.45957	-1.82356	-1.43053
ENSMUSG00000031297	Slc7a3	1208.72	-1.44593	0.270774	5.34001	9.29435e-08	9.03721e-05	1.09414	1.80912	1.61098	0.376064	-0.269567	-0.0595455
ENSMUSG00000059401	Mamld1	790.269	-0.93872	0.17676	5.3107	1.09205e-07	9.95468e-05	0.228867	0.0606953	0.30911	-0.834643	-1.09197	-0.589518
ENSMUSG00000029385	Ccng2	701.79	0.960665	0.182771	-5.25611	1.47135e-07	0.000126233	-1.83956	-1.90507	-1.88182	-1.2516	-0.870004	-0.859591
ENSMUSG00000073616	Cops9	746.329	0.870839	0.166695	-5.22416	1.74946e-07	0.000134294	1.3046	1.36989	1.20093	2.26798	1.99826	1.97816
ENSMUSG00000029675	Eln	1106.68	1.41694	0.271001	-5.22854	1.70856e-07	0.000134294	1.79885	1.77449	1.97388	3.19417	3.48161	2.81974
ENSMUSG00000039108	Lsm14b	1343.64	-0.663114	0.127604	5.19665	2.02911e-07	0.000147973	0.88453	1.11125	0.922776	0.415579	0.0709601	0.213559
ENSMUSG00000062397	Zfp706	1923.87	-1.11347	0.21519	5.17434	2.28714e-07	0.000158847	-3.25457	-3.3068	-3.54765	-4.98271	-4.01093	-4.78657
ENSMUSG00000020163	Uqcr11	1287.3	1.06754	0.211832	-5.03956	4.66596e-07	0.000309332	0.832336	1.35798	1.10109	2.03389	1.79082	2.42291
ENSMUSG00000063511	Snrnp70	2777.23	1.2215	0.244947	-4.98677	6.13962e-07	0.000389332	-1.98441	-2.08093	-2.66916	-1.01139	-0.8818	-1.4237
ENSMUSG00000049775	Tmsb4x	7921.11	1.01618	0.204671	-4.96495	6.87194e-07	0.000417614	0.978579	0.640541	0.424937	1.64913	1.36291	1.82725
ENSMUSG00000025576	Rbfox3	3512.55	-1.00053	0.202131	4.94993	7.42402e-07	0.000433117	-0.699145	-0.756154	-0.986812	-1.6271	-2.00915	-2.02956
ENSMUSG00000032998	Foxj3	999.571	-0.874462	0.178398	4.90174	9.49893e-07	0.000513118	-0.0694998	-0.283376	-0.244927	-1.06377	-1.46979	-0.986292
ENSMUSG00000028820	Sfpq	2726.24	0.971646	0.198168	-4.90314	9.43177e-07	0.000513118	-0.609121	-1.08573	-0.813645	0.0280156	0.186945	0.0288722
ENSMUSG00000067787	Blcap	873.383	-0.835726	0.171313	4.87836	1.06973e-06	0.000557216	-0.667936	-0.733045	-0.975227	-1.98949	-1.41848	-1.73189
ENSMUSG00000041231	Ublcp1	646.017	0.974924	0.200184	-4.87014	1.11519e-06	0.000560864	-1.93568	-2.12616	-1.80655	-0.93461	-1.02616	-1.14341
ENSMUSG00000042978	Sbk1	6641.33	0.996013	0.209337	-4.75794	1.95581e-06	0.000950849	-2.03035	-1.88826	-1.49875	-1.0802	-0.876719	-0.63728
ENSMUSG00000028736	Pax7	17.538	-7.04781	1.49912	4.7013	2.58517e-06	0.00121628	4.64435	5.89182	3.31739	-3.38142	2.85757	-3.3522
ENSMUSG00000030494	Rhpn2	217.396	1.22273	0.261164	-4.68187	2.84274e-06	0.00129567	-0.216146	-0.160728	0.245143	0.820348	1.16706	1.27187
ENSMUSG00000096916	Zfp850	124.147	-2.11739	0.453976	4.66411	3.0996e-06	0.00136993	-1.00859	-1.28678	-2.05903	-2.86225	-4.34305	-3.98098
ENSMUSG00000023087	Noct	647.262	-0.681771	0.147587	4.61945	3.84767e-06	0.00165054	0.373161	0.626215	0.34065	-0.248579	-0.353981	-0.342238
ENSMUSG00000064127	Med14	1131.55	-0.677232	0.147026	4.6062	4.10097e-06	0.00168468	0.514181	0.287572	0.193245	-0.20386	-0.350996	-0.686396
ENSMUSG00000025323	Sp4	792.537	-0.957196	0.207936	4.60331	4.15827e-06	0.00168468	-0.57159	-0.119484	-0.283834	-1.07424	-1.54775	-1.4417
ENSMUSG00000039086	Ss18l1	563.51	-1.12944	0.24603	4.59067	4.41827e-06	0.00174163	-0.309016	0.153661	-0.350305	-1.46723	-1.17878	-1.37883
ENSMUSG00000030122	Ptms	2896.67	1.60562	0.351707	-4.56522	4.98978e-06	0.00191515	-0.676412	-1.28213	-0.229276	0.972034	0.426919	1.18771
ENSMUSG00000026718	Stam	1530.36	-0.674062	0.147877	4.55825	5.15804e-06	0.00192897	0.309505	0.506976	0.410296	-0.140651	-0.417935	-0.452292
ENSMUSG00000041025	Iffo2	353.793	1.41775	0.311479	-4.55166	5.32241e-06	0.00194068	-2.86887	-3.86257	-2.49058	-1.78565	-1.71707	-1.31192
ENSMUSG00000057715	A830018L16Rik	792.192	-1.40098	0.308738	4.53776	5.68539e-06	0.00202247	-0.784683	-0.249233	-1.02039	-1.60356	-2.35488	-2.58493
ENSMUSG00000091405	H4c14	2622.12	-1.89978	0.420258	4.5205	6.16932e-06	0.00214237	11.1661	10.5232	9.8448	8.81155	7.62448	8.90184
ENSMUSG00000025246	Tbl1x	1166.21	-0.598539	0.133242	4.49212	7.0517e-06	0.0023603	-0.69885	-0.565243	-0.730767	-1.18752	-1.50108	-1.33914
ENSMUSG00000040435	Ppp1r15a	261.802	1.55709	0.347385	-4.48233	7.38333e-06	0.0023603	-3.31803	-3.15765	-2.57164	-1.2553	-1.62313	-1.67677
ENSMUSG00000054091	1810037I17Rik	467.467	1.60615	0.35847	-4.48058	7.44422e-06	0.0023603	-1.16326	-0.892612	-0.158305	1.39118	0.61961	0.528395
ENSMUSG00000005338	Cadm3	15178.3	-0.993259	0.221231	4.48968	7.13288e-06	0.0023603	0.12345	0.674548	0.132682	-0.801861	-0.75192	-0.620828
ENSMUSG00000056216	Cebpg	805.755	-1.08909	0.244346	4.45716	8.30533e-06	0.0025773	-1.33604	-0.902077	-1.30167	-1.9742	-2.44127	-2.51884
ENSMUSG00000024193	Phf1	385.156	1.13794	0.255639	-4.45137	8.53226e-06	0.00259256	-1.28996	-1.35972	-0.714115	-0.391374	0.239548	0.0873033
ENSMUSG00000060780	Lrrtm1	225.711	-1.21962	0.274319	4.44598	8.74933e-06	0.00260427	1.98863	1.66159	1.42696	0.282459	0.791244	0.113923
ENSMUSG00000071657	Bscl2	1139.46	-0.719744	0.162541	4.42808	9.50743e-06	0.002695	1.30045	1.36621	0.894775	0.333138	0.320427	0.49522
ENSMUSG00000048100	Taf13	244.31	1.25622	0.284193	-4.4203	9.85623e-06	0.002695	-1.87146	-2.11832	-2.29982	-1.06101	-0.851291	-0.886962
ENSMUSG00000072704	Smim10l1	1726.77	-1.38206	0.31211	4.42812	9.50577e-06	0.002695	-1.50527	-0.817347	-1.52207	-2.8252	-2.89198	-2.46201
ENSMUSG00000039913	Pak5	483.641	-0.879252	0.198886	4.42088	9.82993e-06	0.002695	-0.838809	-0.582143	-0.862055	-1.49804	-1.4258	-2.18158
ENSMUSG00000034566	Atp5h	2265.18	0.654813	0.148227	-4.41765	9.97806e-06	0.002695	-0.234689	-0.145543	-0.110659	0.669206	0.327447	0.252629
ENSMUSG00000036478	Btg1	1596.32	-0.910377	0.206939	4.39925	1.08628e-05	0.00288061	-0.477711	-0.523041	-0.839646	-1.5068	-1.90975	-1.38046
ENSMUSG00000062981	Mrpl42	414.459	-0.978632	0.223191	4.38473	1.16131e-05	0.0030246	0.460196	0.486717	-0.134268	-0.548072	-0.866466	-0.916529
ENSMUSG00000027708	Dcun1d1	516.272	-1.05889	0.241934	4.37678	1.20444e-05	0.00304495	-1.4386	-1.53403	-2.15868	-2.71785	-2.64284	-3.09277
ENSMUSG00000049556	Lingo1	754.075	-1.01535	0.232046	4.37562	1.21088e-05	0.00304495	0.527466	0.28116	0.0581982	-1.16322	-0.587846	-0.577762
ENSMUSG00000025762	Larp1b	231.608	1.12085	0.258378	-4.33803	1.43766e-05	0.00350342	-1.77847	-1.11613	-1.09301	0.114363	-0.501476	-0.400906
ENSMUSG00000048988	Elfn1	43.6116	-2.5948	0.598227	4.33748	1.44124e-05	0.00350342	1.66632	2.0763	1.67458	-1.57251	-0.29867	-0.495659
ENSMUSG00000005802	Slc30a4	981.089	-0.852789	0.197501	4.31791	1.57517e-05	0.00376621	-1.32993	-1.59044	-1.98186	-2.63834	-2.72179	-2.38174
ENSMUSG00000038976	Ppp1r9b	3387.04	0.825562	0.191669	-4.30722	1.65318e-05	0.00388898	-1.4724	-1.72108	-1.59176	-0.734325	-0.753595	-1.06562
ENSMUSG00000020846	Rflnb	503.425	0.972864	0.226308	-4.29885	1.71686e-05	0.00397466	-1.06543	-1.37052	-1.81652	-0.197565	-0.816742	-0.557584
ENSMUSG00000030307	Slc6a11	2325.38	-1.77166	0.413353	4.28607	1.8186e-05	0.00414443	2.16901	2.08519	0.975404	-0.504883	0.506643	-0.161082
ENSMUSG00000037503	Fam168b	3696.15	-0.879183	0.205342	4.28155	1.85598e-05	0.00416454	-1.28915	-0.813706	-1.32547	-2.16399	-2.0283	-2.0425
ENSMUSG00000063568	Jazf1	247.887	-1.54425	0.361977	4.26617	1.98861e-05	0.00439453	0.100536	0.887067	-0.263221	-0.726865	-1.32333	-1.91553
ENSMUSG00000026858	Miga2	1015.9	0.640853	0.150409	-4.26073	2.03764e-05	0.00443567	-0.61854	-0.458375	-0.718761	-0.249439	0.161204	-0.000276114
ENSMUSG00000049517	Rps23	677.773	1.19583	0.281101	-4.25409	2.09896e-05	0.00450197	-1.71516	-2.93461	-2.04518	-0.927698	-0.945552	-1.17415
ENSMUSG00000002625	Akap8l	793.013	1.01546	0.23948	-4.24026	2.2326e-05	0.00465179	-1.60952	-1.77169	-2.0047	-0.794462	-0.70953	-1.07279
ENSMUSG00000028758	Kif17	183.779	1.25315	0.295534	-4.24029	2.2323e-05	0.00465179	-0.268536	-0.273547	-0.26702	0.874225	0.995077	0.888438
ENSMUSG00000015396	Cd83	275.887	-1.27805	0.302193	4.22924	2.34483e-05	0.0048168	0.67198	0.42927	-0.0222367	-1.33054	-0.416024	-1.12323
ENSMUSG00000042506	Usp22	3459.39	-0.556103	0.131907	4.21586	2.48824e-05	0.00497138	0.396089	0.715606	0.573959	-0.109653	-0.0496915	-0.0354176
ENSMUSG00000038893	Fam117a	207.756	1.20488	0.285796	-4.21588	2.48804e-05	0.00497138	0.104846	-0.399078	-0.581558	0.926841	0.84588	0.811182
ENSMUSG00000031391	L1cam	3396.89	-0.760638	0.18107	4.20079	2.65986e-05	0.00524243	1.2709	1.27241	1.26834	0.494378	0.494441	0.30177
ENSMUSG00000034755	Pcdh11x	189.565	-1.72066	0.411291	4.18355	2.86995e-05	0.00554182	1.59813	1.82367	0.353546	-0.94835	0.160367	-0.721088
ENSMUSG00000052854	Nrk	970.228	1.0565	0.252653	-4.1816	2.89464e-05	0.00554182	-1.35692	-1.5798	-1.19224	-0.440521	-0.38456	-0.274629
ENSMUSG00000026238	Ptma	1996.43	1.5357	0.367466	-4.17917	2.92575e-05	0.00554182	-1.87498	-2.67751	-2.23629	-0.156949	-1.43258	-0.920241
ENSMUSG00000031245	Hmgn5	158.957	1.71254	0.41139	-4.16282	3.14337e-05	0.00587769	-1.97691	-1.55542	-2.90568	0.310534	-0.713723	-1.07489
ENSMUSG00000040009	Gnaz	418.326	-0.883809	0.21298	4.14972	3.32876e-05	0.00614557	0.209458	0.440404	0.419885	-0.689799	-0.467532	-0.640563
ENSMUSG00000040412	Elapor1	161.503	-1.52423	0.367769	4.14452	3.40521e-05	0.00620812	1.86552	1.80233	0.982305	-0.672289	0.156008	0.207101
ENSMUSG00000070420	Zscan25	242.394	-0.871089	0.210699	4.13428	3.56069e-05	0.00641144	0.763763	1.37205	0.772814	0.120303	0.0226395	-0.01923
ENSMUSG00000034636	Zyg11b	2797.02	-0.529086	0.128733	4.10995	3.95748e-05	0.007039	-0.581311	-0.488926	-0.555913	-1.12905	-1.14594	-1.17256
ENSMUSG00000031093	Dock11	317.597	0.85315	0.208412	-4.09358	4.24771e-05	0.00746419	-0.540438	-0.870082	-0.855515	0.119276	0.070811	-0.10352
ENSMUSG00000006154	Eps8l1	115.125	2.57888	0.633547	-4.07055	4.69024e-05	0.00811076	#NAME?	-5.89671	-2.19366	-0.441396	-1.51302	-1.53167
ENSMUSG00000003955	Fam162a	705.805	0.758907	0.186522	-4.06874	4.72688e-05	0.00811076	1.39768	1.6936	1.43673	2.42952	1.8654	2.28188
ENSMUSG00000026456	Cyb5r1	738.251	-1.19424	0.293775	4.06517	4.7998e-05	0.00813526	0.984608	1.11781	1.093	0.516441	-0.328396	-0.707228
ENSMUSG00000053293	Pom121	888.501	-0.880837	0.216816	4.06261	4.85271e-05	0.00813526	0.339317	0.464196	0.606546	-0.478863	-0.259669	-0.697926
ENSMUSG00000004980	Hnrnpa2b1	6066.82	0.931322	0.229787	-4.05297	5.05711e-05	0.008273	-1.18355	-1.1759	-1.33833	0.0968256	-0.675859	-0.617443
ENSMUSG00000028838	Extl1	188.192	-1.03258	0.25485	4.05171	5.08443e-05	0.008273	-0.270052	0.040436	-0.358485	-1.11228	-1.33354	-1.44747
ENSMUSG00000047904	Sstr2	60.7057	-2.35218	0.580676	4.05077	5.10504e-05	0.008273	2.90208	-1.0513	1.45139	-0.49918	-0.626597	-1.20483
ENSMUSG00000040118	Cacna2d1	1978.69	-0.917956	0.226889	4.04583	5.21383e-05	0.00835646	0.538398	0.631089	-0.304337	-0.684233	-0.684092	-0.666925
ENSMUSG00000073411	H2-D1	2646.22	0.564114	0.139828	-4.03433	5.47594e-05	0.0085878	1.00634	0.915792	1.21722	1.4395	1.51795	1.66245
ENSMUSG00000008683	Rps15a	1360.7	-0.552461	0.136911	4.03519	5.45575e-05	0.0085878	-1.31103	-1.41843	-1.47481	-1.90155	-1.9915	-2.18395
ENSMUSG00000022194	Pabpn1	607.607	2.14919	0.533469	-4.02871	5.60833e-05	0.00870186	-3.85734	-2.81278	-2.10323	-0.483603	-0.300382	-1.26114
ENSMUSG00000028149	Rap1gds1	3538.57	-0.394022	0.0985167	3.99954	6.34645e-05	0.00974348	0.297692	0.342059	0.0962223	-0.0956753	-0.264502	-0.312916
ENSMUSG00000073676	Hspe1	567.468	0.960696	0.24213	-3.96768	7.25745e-05	0.0108458	0.0864717	-0.425978	0.265979	1.2675	0.483979	0.893157
ENSMUSG00000062070	Pgk1	2868.77	0.731799	0.184292	-3.97086	7.16126e-05	0.0108458	-0.676595	-1.10713	-0.845702	-0.0209154	-0.269503	-0.320756
ENSMUSG00000030671	Pde3b	382.998	1.02711	0.258933	-3.9667	7.28757e-05	0.0108458	-2.20833	-2.35397	-3.04332	-1.37697	-1.46367	-1.83241
ENSMUSG00000026344	Lypd1	186.573	-1.19495	0.301816	3.95919	7.52043e-05	0.0110793	1.30781	0.905949	0.795371	-0.491178	-0.263676	-0.133955
ENSMUSG00000027531	Impa1	1498.47	0.4347	0.109975	-3.9527	7.72727e-05	0.0111627	0.511291	0.541075	0.47727	0.921015	0.787689	0.886151
ENSMUSG00000021962	Dcp1a	343.571	-0.799034	0.202274	3.95026	7.80665e-05	0.0111627	-0.757154	-0.739592	-0.853228	-1.50838	-1.49315	-1.93016
ENSMUSG00000031608	Galnt7	471.829	0.961422	0.243333	-3.95106	7.78069e-05	0.0111627	-0.918828	-1.42314	-2.00222	-0.601786	-0.367392	-0.696994
ENSMUSG00000045038	Prkce	2853.58	-0.71194	0.180424	3.94593	7.94898e-05	0.0112559	-0.646418	-0.558363	-1.00723	-1.34069	-1.56622	-1.62713
ENSMUSG00000008658	Rbfox1	2442.66	-0.491989	0.125363	3.92452	8.69014e-05	0.0119455	0.00984262	0.000519046	-0.208219	-0.713794	-0.583606	-0.615197
ENSMUSG00000031157	Pqbp1	995.186	-0.498926	0.127196	3.9225	8.7636e-05	0.0119455	0.882578	1.09464	1.01548	0.357736	0.432154	0.459113
ENSMUSG00000051401	Kctd16	59.9054	-1.85622	0.473152	3.92309	8.74216e-05	0.0119455	3.66472	1.76624	2.53704	1.12565	0.820354	0.655709
ENSMUSG00000033419	Snap91	5806	-0.353095	0.0899947	3.92351	8.72671e-05	0.0119455	0.589926	0.649432	0.627085	0.136365	0.283782	0.164938
ENSMUSG00000002900	Lamb1	1198.61	1.00635	0.256929	-3.91683	8.97191e-05	0.0121162	0.841403	0.429302	0.698381	1.83759	1.66418	1.28715
ENSMUSG00000063856	Gpx1	846.702	0.662389	0.169336	-3.9117	9.16504e-05	0.0122635	0.837454	0.711156	1.03565	1.48041	1.5756	1.3436
ENSMUSG00000027533	Fabp5	780.797	0.911856	0.233712	-3.90163	9.55462e-05	0.0124423	-0.491402	-0.556378	0.191195	0.586638	0.631015	0.542535
ENSMUSG00000033703	Fcsk	344.042	1.02115	0.26163	-3.90305	9.49894e-05	0.0124423	-0.754809	-0.272907	-0.982482	0.159114	0.554378	0.106591
ENSMUSG00000027236	Eif3j1	483.782	1.2496	0.320117	-3.90357	9.47848e-05	0.0124423	-2.30708	-3.55803	-2.18881	-0.87199	-1.45736	-1.84337
ENSMUSG00000038762	Abcf1	1122.55	0.595928	0.152918	-3.89704	9.73745e-05	0.0125682	-0.289302	-0.618799	-0.390271	0.324667	0.02276	-0.0489083
ENSMUSG00000038418	Egr1	918.443	-1.35018	0.348076	3.87897	0.000104898	0.0134206	1.35787	0.438144	1.09042	-0.656635	-0.690785	0.0586705
ENSMUSG00000109511	Nup62	664.817	-0.842793	0.217511	3.87471	0.000106753	0.0134348	1.18676	0.961748	1.32763	0.395793	-0.0206646	0.358244
ENSMUSG00000032228	Tcf12	1353.48	-0.520399	0.134364	3.87306	0.000107479	0.0134348	-0.673168	-0.545349	-0.909488	-1.13939	-1.28866	-1.4679
ENSMUSG00000027613	Eif6	740.39	-0.638421	0.164865	3.87239	0.000107774	0.0134348	1.09661	1.31635	1.29807	0.683081	0.289225	0.575668
ENSMUSG00000027472	Pdrg1	668.307	0.945526	0.24431	-3.87019	0.000108753	0.013442	-0.640044	-0.67482	-0.233439	0.298386	0.431064	0.460394
ENSMUSG00000042757	Tmem108	415.611	-1.04003	0.268999	3.8663	0.000110498	0.013543	0.21051	0.687005	0.362223	-0.765992	-0.676076	-0.568589
ENSMUSG00000025020	Slit1	207.171	-2.46428	0.637895	3.86314	0.000111938	0.0136051	4.552	3.48921	2.53359	-0.154195	2.67884	0.7723
ENSMUSG00000010608	Rbm25	2058.54	0.614071	0.159111	-3.8594	0.000113665	0.0137009	-1.70677	-1.56777	-1.67281	-1.00722	-1.15355	-1.17001
ENSMUSG00000090461	Iltifb	129.265	3.11809	0.808433	-3.85695	0.000114809	0.0137253	-4.57863	#NAME?	-6.17813	-1.74474	-3.46445	-3.3885
ENSMUSG00000062861	Zfp28	99.6421	2.08045	0.542802	-3.8328	0.000126693	0.0150229	-2.68575	-5.15368	-3.97969	-1.54263	-1.56092	-1.67486
ENSMUSG00000027104	Atf2	1344.27	-0.727371	0.190287	3.82249	0.000132111	0.0153774	-0.250125	-0.630672	-0.86223	-1.67116	-1.21016	-1.28648
ENSMUSG00000040010	Slc7a5	3552.32	-0.769183	0.201298	3.82112	0.000132845	0.0153774	0.955698	1.20279	1.58086	0.460434	0.207169	0.519875
ENSMUSG00000024064	Galnt14	98.8965	-1.73625	0.454307	3.82176	0.000132504	0.0153774	2.44919	2.59881	1.44519	-0.495593	0.972454	0.614321
ENSMUSG00000023942	Slc29a1	574.362	-0.735445	0.193721	3.7964	0.00014681	0.01686	1.32156	1.27309	1.18392	0.164405	0.672855	0.497372
ENSMUSG00000052798	Nup107	294.047	0.793802	0.209322	-3.79225	0.000149287	0.0170106	-0.108377	-0.256488	-0.233707	0.49585	0.665609	0.436885
ENSMUSG00000017778	Cox7c	751.937	1.47715	0.390367	-3.784	0.000154327	0.0174053	-1.2	-2.18472	-1.16546	0.263374	-0.103345	-0.221482
ENSMUSG00000018340	Anxa6	2316.77	0.615645	0.162835	-3.78079	0.000156332	0.0174053	0.709193	0.666251	0.926645	1.58772	1.25355	1.11121
ENSMUSG00000041203	Trir	671.433	0.998814	0.264104	-3.7819	0.000155639	0.0174053	0.731875	0.362388	0.650199	1.22041	1.47904	1.91826
ENSMUSG00000004885	Crabp2	53.5045	2.19375	0.580594	-3.77847	0.000157796	0.0174352	-1.85606	-1.88657	-0.178509	1.47832	0.62453	0.795544
ENSMUSG00000012535	Tnpo3	1059.44	-0.721148	0.191107	3.77353	0.000160951	0.0175003	0.0120351	0.257215	-0.249827	-0.647008	-0.914156	-0.791104
ENSMUSG00000022812	Gsk3b	2862.63	-0.726398	0.192674	3.7701	0.000163184	0.0175003	0.0238368	0.0615768	-0.438656	-0.819188	-0.915956	-0.965221
ENSMUSG00000029394	Cdk2ap1	520.146	-1.82224	0.482963	3.77305	0.000161266	0.0175003	-0.61175	0.524015	-1.69892	-2.02731	-2.4563	-2.32221
ENSMUSG00000000056	Narf	1320.74	0.515425	0.136706	-3.77031	0.000163046	0.0175003	-0.262761	-0.449581	-0.333874	-0.0252921	0.206261	0.115801
ENSMUSG00000026781	Acbd5	1205.65	0.629168	0.166988	-3.76775	0.000164724	0.0175364	-1.22076	-1.51199	-1.59006	-0.813319	-0.97751	-0.885758
ENSMUSG00000029752	Asns	3215.61	-0.738894	0.196268	3.76471	0.00016674	0.0176225	1.22161	1.25383	1.27716	0.815645	0.0929908	0.439471
ENSMUSG00000027002	Nckap1	6414.54	-0.578099	0.153824	3.75819	0.000171148	0.0179582	0.373148	0.325763	-0.0864184	-0.355033	-0.517876	-0.451452
ENSMUSG00000024925	Rnaseh2c	269.515	1.27428	0.34031	-3.74446	0.00018078	0.0185682	1.10884	1.52594	1.18776	2.03606	2.3646	3.20996
ENSMUSG00000049295	Zfp219	790.516	1.11612	0.29793	-3.74623	0.000179509	0.0185682	-1.57801	-2.17192	-1.90369	-1.13286	-0.431812	-0.990945
ENSMUSG00000038233	Gask1a	58.0052	-2.09564	0.559552	3.74521	0.000180244	0.0185682	0.116612	1.94035	-0.0873875	-1.30759	-1.32134	-1.3536
ENSMUSG00000032366	Tpm1	1889.25	0.509162	0.136366	-3.7338	0.000188612	0.0192371	-0.3326	-0.490407	-0.662368	0.115103	-0.152851	-0.150271
ENSMUSG00000074923	Pak6	45.7365	-2.64923	0.709891	3.73188	0.000190055	0.0192497	1.05925	0.335394	-0.248861	-3.65887	-1.42754	-2.51411
ENSMUSG00000024283	Wac	1563.92	-0.566652	0.15209	3.72577	0.000194723	0.0194523	-0.495307	-0.796666	-0.829684	-1.15917	-1.55159	-1.35001
ENSMUSG00000023953	Polh	161.701	-1.11825	0.300139	3.72577	0.000194721	0.0194523	0.539666	0.591049	-0.0249919	-0.757703	-1.09134	-0.627432
ENSMUSG00000049796	Crh	6.0148	-7.43227	1.99632	3.72298	0.000196886	0.0195346	5.69652	2.43238	8.0721	#NAME?	0.416549	-0.600437
ENSMUSG00000018377	Vezf1	977.818	-0.933642	0.250925	3.7208	0.00019859	0.0195705	-0.116876	0.312083	-0.620031	-1.05628	-1.15452	-1.11094
ENSMUSG00000047746	Fbxo40	13.158	-4.43235	1.19265	3.71638	0.000202095	0.0197823	0.860561	3.60686	1.83773	#NAME?	#NAME?	-0.642279
ENSMUSG00000036790	Slitrk2	657.397	-0.715158	0.193054	3.70445	0.000211846	0.0205839	0.584603	0.449587	0.448031	-0.492739	-0.451383	-0.0315874
ENSMUSG00000004044	Cavin1	535.974	0.696191	0.18801	-3.70295	0.000213107	0.0205839	0.556238	0.76034	1.03796	1.42908	1.23003	1.58932
ENSMUSG00000039662	Icmt	6331.86	0.716762	0.193828	-3.69793	0.000217364	0.0208569	-0.936288	-0.899055	-0.340161	-0.0986087	-0.101584	0.00396939
ENSMUSG00000096210	H1f0	2841.92	-0.754016	0.204062	3.69504	0.000219852	0.0209578	0.636754	0.443092	0.0328108	-0.282385	-0.689965	-0.349619
ENSMUSG00000042644	Itpr3	179.395	1.26868	0.343543	-3.69292	0.000221691	0.0209958	-0.0078451	-0.241551	-0.342663	1.34509	1.1976	0.35274
ENSMUSG00000028465	Tln1	1126.12	0.694788	0.188552	-3.68486	0.000228831	0.021258	-0.0271376	0.20089	0.48307	0.91687	0.955149	0.631119
ENSMUSG00000029461	Fam168a	4047.46	-0.696016	0.188812	3.68628	0.000227556	0.021258	-1.39059	-1.01206	-0.926603	-2.05645	-1.90656	-1.68133
ENSMUSG00000036111	Lmo1	93.5079	-1.69612	0.460092	3.68649	0.000227368	0.021258	1.86932	2.45921	0.576294	-0.228179	0.173917	0.0032825
ENSMUSG00000003746	Man1a	733.315	0.812565	0.221418	-3.66982	0.000242718	0.0217366	0.224492	0.281925	0.402736	0.618775	1.29178	1.21541
ENSMUSG00000022546	Gpt	128.323	1.67008	0.454877	-3.6715	0.000241136	0.0217366	-0.543251	-2.23298	-0.14261	1.22161	0.404364	1.0898
ENSMUSG00000015943	Bola1	182.476	1.06356	0.289688	-3.67139	0.000241232	0.0217366	1.79563	1.90302	1.1129	2.43015	2.49904	2.84168
ENSMUSG00000047155	Cyp4x1	151.377	-1.11947	0.305001	3.67039	0.000242182	0.0217366	0.418521	0.500693	0.361369	-1.1539	-0.163794	-1.05235
ENSMUSG00000047767	Atg16l2	206.57	2.05338	0.559368	-3.67089	0.000241712	0.0217366	-2.06803	-1.51305	-3.67645	-0.272158	0.51032	-1.74211
ENSMUSG00000027284	Cdan1	420.791	0.844792	0.230213	-3.66961	0.000242925	0.0217366	-1.22676	-1.0762	-1.27601	-0.346024	-0.228797	-0.695658
ENSMUSG00000031967	Afg3l1	539.195	0.661379	0.18034	-3.6674	0.000245032	0.0217914	-0.897835	-0.925394	-0.964058	-0.0467307	-0.352238	-0.618199
ENSMUSG00000020808	Pimreg	6.98207	-5.97351	1.632	3.66024	0.000251977	0.0221391	#NAME?	2.98987	1.1856	#NAME?	#NAME?	#NAME?
ENSMUSG00000028863	Meaf6	731.904	-0.641215	0.175133	3.6613	0.000250936	0.0221391	-0.973808	-0.570093	-0.765302	-1.54709	-1.36587	-1.52107
ENSMUSG00000019831	Wasf1	1468.15	-0.536502	0.147177	3.64529	0.000267093	0.0232539	1.10626	0.840907	0.857313	0.320096	0.124301	0.494463
ENSMUSG00000037541	Shank2	3400.69	1.02789	0.282035	-3.64456	0.000267854	0.0232539	-1.27459	-1.59748	-0.820656	-0.257978	-0.25179	-0.397647
ENSMUSG00000039960	Rhou	557.512	0.977492	0.269061	-3.63297	0.000280173	0.0241231	-1.45559	-1.81806	-1.46509	-0.930648	-0.941304	-0.194548
ENSMUSG00000050587	Lrrc4c	447.823	-1.2006	0.330557	3.63205	0.000281174	0.0241231	-0.356513	-0.449175	-1.62834	-2.49881	-1.84688	-1.8513
ENSMUSG00000032715	Trib3	102.684	-2.52913	0.697056	3.6283	0.000285291	0.0243331	0.589132	2.23265	-1.89347	-2.09084	-1.13887	-2.07168
ENSMUSG00000024743	Syt7	3904.58	0.690008	0.190954	-3.61349	0.000302108	0.0253105	-0.816439	-1.13714	-0.600462	-0.50117	-0.0119772	-0.182613
ENSMUSG00000019731	Slc35e1	816.579	-0.806504	0.223277	3.61213	0.000303691	0.0253105	-1.14361	-0.55723	-0.635672	-1.78165	-1.5093	-1.66379
ENSMUSG00000040722	Scamp5	4174.76	-0.453147	0.125422	3.61298	0.000302698	0.0253105	-0.118462	-0.189922	-0.0301103	-0.778928	-0.664765	-0.493767
ENSMUSG00000047388	Atmin	811.112	-0.846738	0.234273	3.61432	0.00030114	0.0253105	-0.11425	0.100616	-0.74346	-1.07522	-1.1191	-1.25733
ENSMUSG00000051335	Gfod1	1534.73	0.789689	0.218856	-3.60825	0.000308267	0.0254016	-2.37108	-2.3697	-1.63117	-1.28167	-1.54236	-1.38043
ENSMUSG00000020297	Nsg2	2336.14	-0.958904	0.26567	3.60938	0.000306925	0.0254016	1.33396	0.783973	0.511113	-0.478558	-0.0906583	0.0312492
ENSMUSG00000036309	Skp1	5534.82	0.604461	0.167917	-3.59976	0.000318507	0.0259521	0.662168	0.648517	0.359791	1.23979	0.937916	1.04389
ENSMUSG00000030669	Calca	36.6135	-2.18119	0.605758	3.60077	0.000317279	0.0259521	1.59753	2.299	2.73841	-0.348526	0.213362	0.112018
ENSMUSG00000026655	Fam107b	1784.71	0.76735	0.213346	-3.59674	0.000322229	0.0259653	-0.792995	-1.11713	-1.74608	-0.608601	-0.643208	-0.368017
ENSMUSG00000027827	Kcnab1	2617.5	0.831132	0.231074	-3.59682	0.000322136	0.0259653	-0.0887739	-0.761097	-0.075975	0.413438	0.424385	0.619566
ENSMUSG00000018750	Zbtb4	1256.69	0.599874	0.167714	-3.57676	0.000347884	0.0278785	-2.15733	-2.08168	-2.02609	-1.75438	-1.41393	-1.55358
ENSMUSG00000079598	Clec2l	1826.08	0.679146	0.190816	-3.55917	0.000372035	0.0294899	-0.0533641	-0.0529776	0.454972	0.640247	0.666734	0.886164
ENSMUSG00000002580	Mien1	478.15	0.646906	0.18169	-3.5605	0.000370145	0.0294899	1.63465	1.61406	1.35024	2.28997	2.04366	1.97038
ENSMUSG00000053644	Aldh7a1	1193.7	0.558387	0.157237	-3.55123	0.000383429	0.0299476	-0.160376	-0.133585	-0.0786369	0.531597	0.141205	0.375158
ENSMUSG00000033061	Resp18	725.53	-1.87479	0.528185	3.54949	0.000385976	0.0299476	4.38068	4.066	2.60316	0.810472	2.35774	1.72174
ENSMUSG00000075701	Selenos	1955.97	1.06235	0.299298	-3.54946	0.000386023	0.0299476	1.21712	0.428439	1.32469	2.00931	1.89399	2.23134
ENSMUSG00000031841	Cdh13	546.371	-1.43513	0.403913	3.55307	0.000380764	0.0299476	2.77158	1.88904	1.15671	-0.160421	1.01134	0.539059
ENSMUSG00000056211	R3hdm1	1333.02	-0.606075	0.170994	3.54443	0.000393461	0.0303631	-0.850259	-0.890787	-1.26595	-1.46532	-1.69496	-1.86124
ENSMUSG00000040490	Lrfn2	62.1696	-1.93815	0.54737	3.54084	0.000398861	0.0306178	3.31042	2.25538	1.61904	-0.940178	0.743795	0.947172
ENSMUSG00000030335	Mrpl51	392.798	0.81564	0.230521	-3.53825	0.000402795	0.030758	-0.912271	-1.30615	-1.15562	-0.108736	-0.69483	-0.372494
ENSMUSG00000027855	Sycp1	394.034	1.03002	0.291461	-3.53401	0.000409308	0.0310925	-1.05117	-2.39103	-1.71383	-0.792911	-0.799235	-0.411872
ENSMUSG00000020821	Kif1c	1014.09	0.620229	0.175664	-3.53077	0.000414358	0.031313	-2.23523	-2.14787	-2.4906	-1.74089	-1.78422	-1.69254
ENSMUSG00000042406	Atf4	2589.64	1.06562	0.30225	-3.52562	0.000422491	0.031763	-1.90598	-1.24875	-2.14814	-0.426682	-1.17033	-0.635961
ENSMUSG00000022842	Ece2	66.3815	4.46459	1.26847	-3.51967	0.000432083	0.0321527	#NAME?	#NAME?	-5.43213	-2.47048	-1.57368	-2.60593
ENSMUSG00000024480	Ap3s1	509.922	-0.800268	0.227362	3.51979	0.000431892	0.0321527	-1.69971	-1.5786	-2.1272	-2.77704	-2.68178	-2.62118
ENSMUSG00000071855	Ccdc112	132.384	-1.01565	0.289148	3.51255	0.000443833	0.0326935	0.548375	0.0601804	-0.127187	-0.586152	-1.10446	-1.0462
ENSMUSG00000038369	Ncoa6	1303.27	-0.644918	0.183541	3.51375	0.000441835	0.0326935	-0.346615	-0.575836	-0.489003	-1.07824	-1.12029	-1.36354
ENSMUSG00000024286	Ccny	1109.69	-0.598994	0.170816	3.50667	0.000453757	0.0328945	-1.65075	-1.66367	-2.06398	-2.62744	-2.29692	-2.47663
ENSMUSG00000029012	Orc5	403.267	-0.616496	0.175861	3.5056	0.000455583	0.0328945	0.771075	0.388758	0.702773	0.161177	-0.149351	-0.198638
ENSMUSG00000036902	Neto2	1791.04	-0.879168	0.250605	3.50818	0.000451177	0.0328945	-1.07904	-0.870155	-1.66846	-2.12072	-2.37887	-1.93475
ENSMUSG00000017132	Cyth1	929.202	0.726266	0.207019	-3.50821	0.000451138	0.0328945	-1.32708	-1.5045	-1.61556	-0.766731	-0.798226	-0.906292
ENSMUSG00000021669	Cert1	1297.08	0.466848	0.133327	-3.50152	0.000462617	0.0330748	-0.86039	-1.1731	-0.975281	-0.549182	-0.640612	-0.644649
ENSMUSG00000032575	Manf	818.81	0.639406	0.18255	-3.50263	0.000460683	0.0330748	1.21394	0.914877	0.652139	1.75512	1.50298	1.23207
ENSMUSG00000021700	Rab3c	4225.38	-0.701823	0.200571	3.49912	0.000466795	0.0331157	-1.2715	-1.25309	-2.0461	-2.13235	-2.23563	-2.45153
ENSMUSG00000032405	Pias1	810.858	-0.540752	0.154563	3.49859	0.00046773	0.0331157	0.488458	0.0732646	0.0118821	-0.436416	-0.45257	-0.3936
ENSMUSG00000025089	Gfra1	278.472	-1.31588	0.376994	3.49045	0.000482201	0.0338243	1.47423	0.858914	1.27859	-0.768006	0.746273	-0.297038
ENSMUSG00000074793	Hspa12b	246.936	0.989242	0.283421	-3.49036	0.000482377	0.0338243	0.344168	0.538538	1.01042	1.49708	1.87221	1.29159
ENSMUSG00000050035	Fhl4	9.77528	-5.11867	1.46839	3.48591	0.00049047	0.0340643	1.50413	0.641621	-0.0362111	#NAME?	#NAME?	#NAME?
ENSMUSG00000059005	Hnrnpa3	2557.5	1.17796	0.337883	-3.48629	0.000489772	0.0340643	-2.82981	-3.21215	-2.7699	-1.13416	-2.27724	-2.25439
ENSMUSG00000027935	Rab13	99.9456	1.34366	0.386019	-3.48081	0.000499899	0.0343213	0.11056	-0.72764	-0.517231	1.62132	0.365228	0.62225
ENSMUSG00000032454	Rbp2	5.2941	5.75723	1.65433	-3.4801	0.00050123	0.0343213	#NAME?	#NAME?	#NAME?	2.8145	2.48935	4.55146
ENSMUSG00000068040	Tm9sf4	1673.42	-0.408935	0.117452	3.48171	0.000498219	0.0343213	0.856625	0.999542	0.767773	0.546456	0.399423	0.235917
ENSMUSG00000061887	Ssbp3	1384.86	-0.562875	0.161824	3.47833	0.000504553	0.0343874	0.014158	-0.229546	-0.318325	-0.797399	-0.633798	-0.993464
ENSMUSG00000048489	Depp1	31.0276	2.5115	0.723078	-3.47335	0.000514014	0.0348693	1.03031	-2.87916	-0.415927	2.40886	1.24459	2.38574
ENSMUSG00000018395	Kif3a	1695.9	0.503869	0.145261	-3.46872	0.000522941	0.0351599	-0.178879	-0.31411	-0.0403955	0.326104	0.320243	0.144419
ENSMUSG00000054013	Tmem179	431.772	-1.42166	0.409863	3.46863	0.000523119	0.0351599	2.00515	1.29418	0.95592	-0.804918	0.399348	0.0364244
ENSMUSG00000055489	Ano5	53.5776	-1.99088	0.574197	3.46724	0.000525831	0.03518	0.100563	-0.185819	-0.913764	-1.9906	-2.12907	-3.1171
ENSMUSG00000053063	Clec12a	4.53474	-5.72167	1.65096	3.46565	0.000528944	0.0352267	1.54788	3.16153	2.83388	#NAME?	#NAME?	#NAME?
ENSMUSG00000031489	Adrb3	6.51751	-5.56813	1.60831	3.4621	0.000535969	0.0355323	1.58913	3.24353	0.690766	#NAME?	#NAME?	#NAME?
ENSMUSG00000027570	Col9a3	1381.57	0.86304	0.249464	-3.45958	0.000541024	0.0357051	-0.0507062	0.644869	0.640222	1.1038	1.17801	1.39407
ENSMUSG00000026421	Csrp1	2885.34	0.635709	0.183834	-3.45806	0.000544089	0.0357456	0.267555	0.120902	0.162774	0.704098	0.585141	0.897592
ENSMUSG00000060475	Wtap	715.433	-0.537462	0.155898	3.44752	0.000565754	0.0370024	-0.388078	-0.272518	-0.576268	-0.953133	-1.1284	-1.00969
ENSMUSG00000038451	Spsb2	79.2401	1.21162	0.351659	-3.44545	0.000570101	0.0371202	-0.249774	0.489873	-0.100862	1.02999	1.19438	1.31975
ENSMUSG00000031492	Chrnb3	18.6533	-3.68287	1.07028	3.44103	0.000579511	0.0372267	2.82727	4.66766	2.01269	-3.35578	0.994995	0.618009
ENSMUSG00000015711	Prune1	708.027	-0.620139	0.180346	3.4386	0.000584722	0.0372267	-0.21783	0.190181	-0.0517144	-0.686554	-0.7443	-0.690584
ENSMUSG00000054452	Tle5	3848.56	-0.509311	0.148162	3.43753	0.000587051	0.0372267	0.334037	0.668512	0.172402	-0.343885	-0.147809	-0.0750398
ENSMUSG00000066415	Msl2	817.147	-0.951294	0.276716	3.4378	0.000586456	0.0372267	-0.839838	-0.385564	-1.30723	-1.80722	-1.96811	-1.73341
ENSMUSG00000025650	Col7a1	161.168	2.71702	0.790333	-3.43782	0.000586418	0.0372267	-2.25271	-2.31803	-2.52265	1.08612	0.707254	-2.25918
ENSMUSG00000034652	Cd300a	70.974	4.22186	1.22721	-3.44022	0.000581252	0.0372267	-4.56551	#NAME?	#NAME?	-1.53079	-1.3794	-2.42094
ENSMUSG00000018574	Acadvl	788.487	0.559584	0.162911	-3.43492	0.000592738	0.0374246	0.867412	1.24877	0.901378	1.70753	1.29202	1.4836
ENSMUSG00000009734	Pou6f2	6.70431	-5.95691	1.74115	3.42124	0.000623352	0.0386412	#NAME?	1.22157	4.31739	#NAME?	-1.70694	#NAME?
ENSMUSG00000069833	Ahnak	1142.8	1.35926	0.397184	-3.42224	0.000621081	0.0386412	0.71391	-0.572318	0.317149	1.61003	1.5735	1.3312
ENSMUSG00000038295	Atg9b	30.7249	-2.66128	0.777433	3.42316	0.000618982	0.0386412	3.58317	3.34207	1.62937	-1.38479	1.33634	-0.406808
ENSMUSG00000008450	Nutf2	261.388	-0.691393	0.201914	3.42419	0.000616629	0.0386412	0.730843	0.924521	0.492224	0.0313589	-0.0304157	-0.140981
ENSMUSG00000063870	Chd4	3746.34	0.696472	0.203622	-3.42042	0.000625254	0.0386412	-0.340608	-0.716576	-0.247059	0.381716	0.278892	-0.120131
ENSMUSG00000045996	Polr2k	172.041	1.23498	0.361569	-3.41562	0.000636369	0.0386854	-0.0793769	0.379805	0.0989094	1.95754	0.701346	1.08509
ENSMUSG00000016552	Foxred2	526.386	-1.02433	0.299852	3.41611	0.000635215	0.0386854	-0.527369	0.377895	-0.651751	-1.30033	-1.17709	-1.39568
ENSMUSG00000035896	Rnase1	7.82917	-7.85962	2.30109	3.41561	0.000636391	0.0386854	4.69652	5.37594	6.19763	#NAME?	#NAME?	#NAME?
ENSMUSG00000022974	Paxbp1	1495.77	0.914993	0.267892	-3.41553	0.000636578	0.0386854	-1.97618	-2.47001	-2.33463	-1.49819	-1.11036	-1.64499
ENSMUSG00000011877	Git1	1612.13	-0.586774	0.171915	3.41316	0.000642139	0.0387942	0.0092088	0.223513	-0.0747474	-0.680533	-0.494771	-0.64203
ENSMUSG00000027573	Gid8	645.606	-0.526324	0.154234	3.4125	0.000643689	0.0387942	0.443865	0.205095	0.00460727	-0.261465	-0.393815	-0.493269
ENSMUSG00000020176	Grb10	722.493	-0.784083	0.22998	3.40935	0.000651189	0.0390528	0.178235	0.657111	0.193383	-0.678743	-0.262468	-0.51715
ENSMUSG00000031513	Leprotl1	1190	-0.959314	0.281582	3.40688	0.000657106	0.0390528	-0.254397	0.0494461	-0.10259	-1.10822	-1.35386	-0.989495
ENSMUSG00000027940	Tpm3	1097.53	0.927517	0.272277	-3.40652	0.000657965	0.0390528	-1.22387	-2.23453	-1.27618	-0.42109	-0.765857	-0.773843
ENSMUSG00000028849	Map7d1	2890.69	0.509665	0.149628	-3.40622	0.000658689	0.0390528	-0.410102	-0.245481	-0.198969	-0.0507891	0.286177	0.233716
ENSMUSG00000022636	Alcam	1171.96	-0.601769	0.177026	3.39933	0.000675505	0.0398876	0.596545	0.557766	0.316004	-0.308987	-0.0943716	-0.174686
ENSMUSG00000028221	Pip4p2	769.534	-0.583201	0.171857	3.39352	0.000690014	0.0402554	0.653653	0.896378	0.422466	0.169992	-0.135624	-0.014637
ENSMUSG00000092094	Zfp804b	6.07372	-6.05687	1.78405	3.39501	0.000686254	0.0402554	5.69652	3.04665	3.31739	#NAME?	0.712096	#NAME?
ENSMUSG00000070570	Slc17a7	6199.6	-0.891348	0.262633	3.39389	0.000689069	0.0402554	-0.15089	0.570003	0.0479563	-0.384649	-1.03636	-0.944864
ENSMUSG00000031210	Gpr165	266.6	-1.73926	0.51304	3.39011	0.000698649	0.0405968	3.41563	2.98284	2.13528	0.316344	1.82731	1.12972
ENSMUSG00000040681	Hmgn1	596.36	0.791269	0.233514	-3.38853	0.000702686	0.0406379	-1.62883	-1.78173	-2.49768	-1.26026	-1.17056	-1.29418
ENSMUSG00000025374	Nabp2	586.411	-0.752395	0.222099	3.38766	0.000704929	0.0406379	0.642343	0.939814	0.700813	-0.18959	-0.264311	0.17174
ENSMUSG00000024513	Mbd2	349.5	0.727442	0.214972	-3.3839	0.000714648	0.041036	-1.04286	-1.4024	-1.61323	-0.639519	-0.88708	-0.607504
ENSMUSG00000061981	Flot2	930.058	-0.687498	0.203368	3.38057	0.000723364	0.0413736	-0.00383136	0.416762	-0.0979976	-0.938764	-0.549099	-0.455709
ENSMUSG00000043668	Tox3	62.2322	-2.08079	0.616188	3.37687	0.000733153	0.0417209	2.79356	2.68448	1.84542	-0.0414276	0.265998	0.307037
ENSMUSG00000028601	Echdc2	173.422	1.50876	0.446892	-3.37612	0.000735158	0.0417209	-2.57294	-0.696674	-2.89257	-0.314855	-0.234352	-0.725196
ENSMUSG00000067274	Rplp0	1832.76	-0.432192	0.128058	3.37497	0.000738237	0.0417333	-0.949739	-0.853279	-0.840549	-1.17591	-1.54219	-1.45811
ENSMUSG00000002981	Clptm1	3534.65	-0.538073	0.159553	3.37239	0.000745195	0.041964	1.62189	1.8592	1.46168	0.923911	1.09833	1.09807
ENSMUSG00000042272	Sestd1	2022.34	0.629074	0.186749	-3.36855	0.000755647	0.0423889	-1.43891	-1.57408	-1.1628	-0.994078	-0.869172	-0.619711
ENSMUSG00000022354	Ndufb9	2280.27	0.456321	0.135517	-3.36727	0.00075915	0.0424222	2.02883	1.89046	1.8201	2.26739	2.19369	2.40248
ENSMUSG00000046159	Chrm3	120.32	-2.06305	0.613185	3.36449	0.00076686	0.0426895	2.23563	1.71726	0.538576	-1.92018	0.635906	-0.64036
ENSMUSG00000030842	Lamtor1	572.4	-0.853578	0.253814	3.363	0.000770998	0.0427567	-0.0269207	0.278853	-0.590227	-1.23925	-1.09522	-0.771169
ENSMUSG00000033083	Tbc1d4	944.617	0.65476	0.194899	-3.35948	0.000780886	0.0429782	-0.723742	-1.22556	-0.817411	-0.467843	-0.38967	-0.121046
ENSMUSG00000052572	Dlg2	5465.95	0.560586	0.166848	-3.35987	0.000779797	0.0429782	-0.775328	-0.983482	-0.637375	-0.14597	-0.350571	-0.455608
ENSMUSG00000021431	Snrnp48	349.64	0.879151	0.261983	-3.35575	0.000791494	0.0432357	-1.99243	-1.74389	-2.68455	-1.24395	-1.17715	-1.54923
ENSMUSG00000052783	Grk4	46.765	3.12498	0.931009	-3.35656	0.000789199	0.0432357	-3.66979	#NAME?	-4.56589	-0.985341	-1.33382	-2.33267
ENSMUSG00000018820	Zfyve27	1154.57	0.522984	0.15597	-3.3531	0.000799129	0.0434899	-0.315803	-0.476974	-0.537625	-0.16979	0.21094	-0.00114491
ENSMUSG00000075033	Nxpe3	200.853	-0.907099	0.270954	3.34779	0.000814582	0.0441253	0.202422	-0.15364	-0.372474	-1.6419	-0.684239	-1.02822
ENSMUSG00000030525	Chrna7	224.651	-1.30649	0.390344	3.34702	0.000816856	0.0441253	2.43764	2.79558	2.25429	0.0609667	1.57218	1.62665
ENSMUSG00000020672	Sntg2	8.97118	-4.52221	1.3517	3.34556	0.000821165	0.0441944	5.65292	3.63161	4.04988	-0.889852	-0.0890215	0.821519
ENSMUSG00000042817	Flt3	891.841	0.616109	0.184302	-3.34293	0.000828993	0.0444517	0.907815	0.738531	0.993051	1.35015	1.4494	1.49806
ENSMUSG00000036835	Psenen	274.526	0.825478	0.247188	-3.33947	0.000839385	0.0446036	-1.32696	-0.539699	-0.583133	0.0901745	-0.254836	0.0117792
ENSMUSG00000026496	Parp1	1320.86	0.871815	0.261106	-3.33894	0.000840999	0.0446036	-0.404749	-0.909934	-0.278506	0.568341	0.344903	-0.0879678
ENSMUSG00000037364	Srrt	1153.8	0.74519	0.223137	-3.33961	0.000838966	0.0446036	-1.05407	-1.00584	-1.55681	-0.32074	-0.520522	-0.823238
ENSMUSG00000069208	Zfp825	70.2292	-1.76264	0.528565	3.33475	0.00085375	0.0449529	-0.502417	-0.576989	-2.48155	-3.22791	-2.18714	-3.30796
ENSMUSG00000040495	Chrm4	31.2264	-1.99229	0.597414	3.33486	0.000853426	0.0449529	3.59379	2.86989	4.24304	1.03819	1.75249	2.02031
ENSMUSG00000020962	Gtf2a1	777.302	-0.567015	0.170288	3.32974	0.000869282	0.0456061	-0.00756375	0.0543268	-0.126461	-0.494891	-0.964919	-0.550684
ENSMUSG00000052298	Cdc42se2	952.754	-0.589861	0.177298	3.32696	0.000878005	0.0457347	-1.14535	-1.26283	-1.77926	-2.09558	-2.13749	-1.9634
ENSMUSG00000028826	Maco1	1262.67	-0.483183	0.145211	3.32747	0.000876399	0.0457347	0.118418	-0.00360659	-0.299338	-0.657459	-0.723777	-0.492417
ENSMUSG00000022861	Dgkg	2169.76	0.855944	0.257442	-3.3248	0.000884807	0.0459249	0.635279	0.0627696	1.13322	1.37626	1.28886	1.53586
ENSMUSG00000021130	Galnt16	1077.84	-0.682296	0.205427	3.32136	0.000895799	0.0461669	1.04995	1.00864	0.901443	-0.151195	0.440007	0.407991
ENSMUSG00000074896	Ifit3	117.75	-1.99809	0.601422	3.32227	0.00089288	0.0461669	-0.212372	0.023157	-0.108919	-3.63877	-2.83795	-1.0271
ENSMUSG00000039419	Cntnap2	2181.99	-0.637049	0.192024	3.31756	0.000908084	0.0466352	1.2948	0.911681	0.967672	0.0941323	0.521481	0.456761
ENSMUSG00000040035	Disp2	6206.06	-0.624996	0.188495	3.31572	0.000914087	0.0467788	1.20575	1.09173	1.20156	0.131138	0.787741	0.517875
ENSMUSG00000004945	Tmem242	497.974	0.665082	0.200656	-3.31453	0.000917966	0.0468131	0.136813	-0.223806	-0.203907	0.474166	0.251075	0.726323
ENSMUSG00000024797	Vps51	19.712	-4.52539	1.36953	3.30434	0.000952002	0.0470793	#NAME?	-1.05805	-0.946581	#NAME?	#NAME?	#NAME?
ENSMUSG00000059851	Kmt5c	226.352	1.35643	0.409729	-3.31055	0.000931118	0.0470793	-2.34384	-2.41075	-1.97921	-1.29339	-0.510457	-0.921576
ENSMUSG00000093536	Smim17	72.6699	-2.49569	0.754207	3.30903	0.000936206	0.0470793	-0.0534012	-0.627571	-1.49261	-4.07952	-3.538	-3.09253
ENSMUSG00000021047	Nova1	1268.16	-0.72406	0.219059	3.30532	0.000948694	0.0470793	-0.401392	-0.193237	-1.00517	-1.60347	-1.17741	-1.23119
ENSMUSG00000027820	Mme	45.5058	-1.86941	0.564813	3.30978	0.000933701	0.0470793	0.718975	0.718534	0.116084	-2.35608	-0.480828	-1.41463
ENSMUSG00000027996	Sfrp2	60.5915	-1.90043	0.574842	3.30601	0.000946347	0.0470793	3.40234	3.61117	2.9857	1.76042	1.12434	0.841008
ENSMUSG00000042129	Rassf4	116.631	-1.37952	0.417615	3.30332	0.000955466	0.0470793	0.206596	-0.217851	-1.02818	-1.68384	-1.16	-2.37569
ENSMUSG00000030513	Pcsk6	2330.99	0.594155	0.179549	-3.30916	0.000935778	0.0470793	0.60816	0.360111	0.737553	0.966101	1.1438	1.15229
ENSMUSG00000033434	Gtpbp6	183.28	1.11947	0.338711	-3.30508	0.000949506	0.0470793	1.01957	0.0608371	0.107777	1.68302	1.11277	1.51863
ENSMUSG00000039911	Spsb1	406.47	0.583576	0.176639	-3.30377	0.000953931	0.0470793	-0.0693437	-0.188661	0.162705	0.337188	0.624738	0.490844
ENSMUSG00000030522	Mtmr10	431.444	0.653642	0.197974	-3.30166	0.00096114	0.0471994	-1.26092	-1.20821	-1.07314	-0.318658	-0.698649	-0.798779
ENSMUSG00000021779	Thrb	130.912	-1.27603	0.387255	3.29507	0.000983981	0.0481589	-0.82881	-1.09972	-1.53264	-3.00194	-2.16695	-2.32753
ENSMUSG00000057738	Sptan1	26278.6	0.83327	0.253211	-3.29081	0.000998992	0.0487301	0.135045	-0.540505	0.315829	0.882233	0.780187	0.595407
ENSMUSG00000103793	Pcdhga6	456.539	-0.62533	0.190173	3.28821	0.00100826	0.0490021	1.67538	1.72177	1.5787	1.29691	0.877475	0.695362
ENSMUSG00000078812	Eif5a	3137.03	-0.365756	0.111261	3.28737	0.00101129	0.0490021	0.588863	0.566409	0.309395	0.1739	-0.0793313	0.050146
ENSMUSG00000034424	Gcsh	480.413	0.667344	0.20348	-3.27965	0.00103935	0.050098	-0.568405	-0.358024	-0.716043	0.20057	-0.144829	0.0393103
ENSMUSG00000064247	Plcxd1	61.4082	-1.48945	0.45433	3.27834	0.00104421	0.050098	0.86759	0.310972	-0.437639	-1.80015	-0.877337	-1.32769
ENSMUSG00000036555	Iqce	257.539	0.917622	0.279897	-3.27843	0.00104385	0.050098	-1.9357	-1.55738	-1.58758	-0.791525	-0.701411	-1.0331
ENSMUSG00000026107	Nabp1	60.3559	-1.898	0.579362	3.27601	0.00105283	0.0503462	-1.0252	-1.16202	-2.01628	-2.74079	-3.23182	-4.12464
ENSMUSG00000021687	Scamp1	3539.5	-0.497965	0.152049	3.27504	0.00105648	0.0503555	0.0988855	0.160062	-0.13557	-0.624871	-0.621346	-0.386844
ENSMUSG00000019966	Kitl	2462.16	0.780112	0.238335	-3.27318	0.00106344	0.0505221	-1.18622	-1.87371	-1.51176	-0.518277	-1.25974	-0.67083
ENSMUSG00000031488	Rab11fip1	119.779	1.24736	0.38142	-3.2703	0.00107434	0.050546	0.0444301	-0.331441	0.730102	0.879482	1.36786	1.86717
ENSMUSG00000044080	S100a1	530.446	0.9165	0.280198	-3.2709	0.00107205	0.050546	0.999518	1.09552	0.822754	1.7973	1.2605	2.19729
ENSMUSG00000035504	Reep6	326.584	-1.34742	0.411929	3.271	0.00107169	0.050546	-0.116299	0.899458	-0.0904728	-0.282879	-1.52284	-1.3619
ENSMUSG00000031799	Tpm4	614.847	1.07776	0.329677	-3.26913	0.00107878	0.0505567	-1.37436	-1.85582	-2.1178	0.0129704	-0.975303	-1.36234
ENSMUSG00000001119	Col6a1	456.922	0.917495	0.280812	-3.26729	0.00108581	0.0505567	0.383703	1.08304	-0.113639	1.48562	1.29606	1.27312
ENSMUSG00000051379	Flrt3	424.476	-0.897035	0.274579	3.26695	0.00108713	0.0505567	0.588479	1.08956	0.130447	-0.520862	-0.317634	-0.16012
ENSMUSG00000067847	Romo1	499.758	0.873747	0.267478	-3.26661	0.00108843	0.0505567	2.03558	1.5442	2.37674	2.7074	2.61845	3.15357
ENSMUSG00000058927	Gm10053	33.5358	4.2094	1.29094	-3.26072	0.00111131	0.0506516	-3.69463	#NAME?	-2.4885	2.22302	-3.39186	-0.641329
ENSMUSG00000008690	Ncaph2	1046.24	0.423845	0.129931	-3.26208	0.00110599	0.0506516	-0.399014	-0.586141	-0.520452	-0.0641345	-0.00594463	-0.360183
ENSMUSG00000038374	Rbm8a	565.597	0.661093	0.202561	-3.26367	0.00109978	0.0506516	-0.783996	-0.458671	-0.942744	0.220126	-0.388363	-0.30836
ENSMUSG00000006764	Tph2	29.6246	-2.9383	0.900028	3.26468	0.00109589	0.0506516	1.07746	1.81427	0.823709	-2.79454	-0.201958	-2.00903
ENSMUSG00000032418	Me1	848.885	0.441762	0.135471	-3.26092	0.0011105	0.0506516	-1.37519	-1.28837	-1.21075	-0.909246	-0.916364	-0.942617
ENSMUSG00000040434	Large2	7.93649	4.83673	1.48328	-3.26084	0.00111082	0.0506516	#NAME?	#NAME?	#NAME?	1.3807	-1.35457	0.534536
ENSMUSG00000032254	Kif23	24.273	-3.19978	0.982816	3.25572	0.00113103	0.0513898	0.141159	2.53074	0.777692	0.472207	-2.37909	-2.97088
ENSMUSG00000038861	Pi4kb	843.099	-0.648418	0.199307	3.25336	0.00114048	0.0516581	0.691881	0.923296	0.891507	-0.0964057	0.382962	0.0361739
ENSMUSG00000021186	Fbln5	430.825	-1.25375	0.385516	3.25213	0.00114543	0.0517218	2.51876	2.52766	0.938759	0.821747	0.587489	0.864458
ENSMUSG00000030421	Uri1	557.62	0.800165	0.246305	-3.24867	0.00115947	0.0521939	-1.76652	-2.03074	-2.83589	-1.64869	-1.54877	-1.2156
ENSMUSG00000040459	Arglu1	1363.52	1.31222	0.404605	-3.24321	0.0011819	0.0525468	-2.19023	-3.47138	-2.42217	-1.14424	-1.38858	-1.47213
ENSMUSG00000025044	Msr1	12.814	-3.29423	1.01594	3.24254	0.00118469	0.0525468	2.58317	2.49569	0.738411	-0.213977	-1.35457	-2.70172
ENSMUSG00000041308	Sntb2	226.998	0.917093	0.282671	-3.24438	0.00117705	0.0525468	-1.85368	-2.47313	-2.0825	-1.0523	-1.28222	-1.45036
ENSMUSG00000020788	Atp2a3	8251.41	0.817317	0.252072	-3.24239	0.00118532	0.0525468	0.609386	0.0527966	0.791104	0.972336	1.37865	1.42983
ENSMUSG00000035355	Kcnh4	9.84336	-4.42646	1.36414	3.24487	0.00117503	0.0525468	3.79067	1.77421	2.98131	-0.806547	#NAME?	#NAME?
ENSMUSG00000047412	Zbtb44	459.225	-0.760343	0.234651	3.24032	0.00119396	0.0527693	-0.486262	-0.207243	-0.87309	-1.31875	-1.51324	-1.21351
ENSMUSG00000029064	Gnb1	7300.72	-0.371291	0.114716	3.2366	0.00120963	0.0533003	0.593179	0.679254	0.38587	0.277765	0.00893095	0.0391174
ENSMUSG00000041354	Rgl2	496.864	1.38336	0.428251	-3.23027	0.00123675	0.0540655	-2.07483	-2.30027	-3.2849	-1.09416	-0.72456	-2.12661
ENSMUSG00000023932	Cdc5l	943.8	0.723804	0.224026	-3.2309	0.00123403	0.0540655	-0.917388	-1.52273	-1.16737	-0.101185	-0.837692	-0.670965
ENSMUSG00000025138	Sirt7	308.423	0.880378	0.272567	-3.22995	0.00123811	0.0540655	-0.850737	-0.906754	-1.3195	-0.0739909	-0.0932835	-0.491122
ENSMUSG00000057132	Rpgrip1	11.144	-3.59299	1.11352	3.22668	0.00125236	0.0545243	1.14116	1.82313	0.455764	#NAME?	#NAME?	-1.14559
ENSMUSG00000062488	Ifit3b	50.865	-2.19652	0.681211	3.22444	0.0012622	0.0546753	-0.355869	-0.00388403	-2.155	-2.65093	-5.02964	-2.10643
ENSMUSG00000026163	Sphkap	8725.34	0.417624	0.129597	-3.22249	0.00127082	0.0546753	-0.466597	-0.418201	-0.676238	0.0158668	-0.198571	-0.347304
ENSMUSG00000070493	Chchd2	1166.7	0.77019	0.238921	-3.22362	0.00126583	0.0546753	-1.8714	-1.47365	-1.30909	-0.87614	-1.04345	-0.5317
ENSMUSG00000002748	Baz1b	2273.02	0.711592	0.220805	-3.22272	0.00126979	0.0546753	-1.38087	-1.52001	-1.50398	-0.427671	-0.795388	-1.30074
ENSMUSG00000020658	Efr3b	2909.89	-0.377748	0.11728	3.22092	0.0012778	0.0548138	-0.548507	-0.637831	-0.498417	-1.01058	-0.978323	-1.04619
ENSMUSG00000036459	Wtip	39.2983	2.46928	0.768154	-3.21457	0.00130642	0.0558772	-2.33969	#NAME?	-1.96506	0.121855	-0.0280123	-0.652065
ENSMUSG00000029161	Cgref1	97.9506	-1.09359	0.340886	3.20809	0.00133618	0.0561789	1.23416	0.738992	0.812371	-0.264308	0.149807	-0.501305
ENSMUSG00000047242	Taf9b	443.896	-0.697232	0.217324	3.20826	0.00133543	0.0561789	0.254066	0.61946	0.161819	-0.299493	-0.575691	-0.435073
ENSMUSG00000032340	Neo1	2373.92	-0.575578	0.179419	3.20801	0.00133658	0.0561789	0.767176	0.536074	0.339678	-0.137741	-0.113398	-0.0328465
ENSMUSG00000090061	Nwd2	307.593	1.18967	0.370688	-3.20936	0.00133031	0.0561789	-0.272364	-1.16837	-1.33927	-0.275991	0.809452	0.162158
ENSMUSG00000034667	Xpot	1333.95	-0.72233	0.225046	3.2097	0.00132874	0.0561789	-0.776132	-0.801658	-1.24887	-1.32873	-1.88703	-1.90924
ENSMUSG00000026548	Slamf9	10.5051	-3.44532	1.07275	3.21166	0.0013197	0.0561789	2.52102	3.16153	4.04988	-0.376849	-1.53111	0.356195
ENSMUSG00000028100	Nudt17	44.9664	-1.9361	0.604088	3.205	0.00135062	0.0566056	2.86681	2.2787	1.17404	-0.344156	-0.46739	0.349
ENSMUSG00000028577	Plaa	897.384	-0.443869	0.138877	3.19614	0.00139281	0.0582066	0.00894249	0.294587	0.210682	-0.212869	-0.380324	-0.428375
ENSMUSG00000024008	Cpne5	106.646	-2.17822	0.682087	3.19346	0.00140577	0.0585347	3.20227	2.75768	1.63056	-1.27499	1.31848	0.475338
ENSMUSG00000027298	Tyro3	1737.62	0.692075	0.216757	-3.19287	0.00140869	0.0585347	-0.696099	0.058371	-0.907697	0.0930265	0.19031	0.0516755
ENSMUSG00000004897	Hdgf	1425.05	0.530702	0.166277	-3.19168	0.0014145	0.0586094	-1.24854	-1.6943	-1.53581	-0.939889	-1.28224	-0.900293
ENSMUSG00000066595	Flvcr1	281.597	-0.830363	0.260349	3.18942	0.00142559	0.0589016	-0.388044	0.23939	-0.866237	-1.22115	-1.37252	-1.12583
ENSMUSG00000030102	Itpr1	53368	1.07007	0.335857	-3.18609	0.00144212	0.0594162	-0.288768	-1.05557	0.521899	0.970414	0.737487	0.495926
ENSMUSG00000080268	Brms1	123.814	1.0398	0.32658	-3.1839	0.00145303	0.0596972	-1.22217	-1.33662	-0.940448	0.025923	-0.21295	-0.324566
ENSMUSG00000024395	Lims2	253.734	0.854509	0.268889	-3.17792	0.00148334	0.060601	0.482987	0.558655	0.426287	1.6108	1.05235	1.0679
ENSMUSG00000033287	Kctd17	1179.09	0.454402	0.142978	-3.17812	0.00148233	0.060601	-0.299047	-0.208359	-0.270458	0.197947	0.135087	0.0375879
ENSMUSG00000000263	Glra1	100.722	-2.94067	0.925886	3.17606	0.00149289	0.0608208	6.49554	5.81265	2.74119	0.878069	3.13557	1.23656
ENSMUSG00000042625	Safb2	900.348	1.00613	0.316876	-3.17516	0.00149755	0.0608323	-1.70824	-1.40715	-1.73263	-0.48172	-0.354403	-1.41593
ENSMUSG00000020151	Ptprr	2749.55	0.590269	0.185947	-3.17439	0.00150152	0.0608323	0.512932	0.414875	0.55408	1.2454	0.95868	0.797694
ENSMUSG00000051236	Msrb3	116.451	1.6147	0.509027	-3.17212	0.00151329	0.0611393	-1.8907	-2.84681	-1.52937	-0.719514	-1.04055	0.0855405
ENSMUSG00000062729	Ppox	259.213	0.985121	0.310713	-3.17052	0.00152166	0.061266	-1.43146	-1.62836	-2.02227	-1.40102	-0.405273	-0.529754
ENSMUSG00000027361	Gabpb1	346.651	-0.861249	0.271695	3.16992	0.00152482	0.061266	0.124305	0.392239	-0.53993	-0.694529	-1.3583	-0.814936
ENSMUSG00000048534	Jaml	61.932	1.46536	0.462419	-3.16889	0.00153022	0.061314	-0.111868	-1.31529	-0.560225	1.20546	0.710862	0.49021
ENSMUSG00000031207	Msn	1035.92	0.907921	0.286639	-3.16748	0.00153768	0.0614439	-0.518435	-0.613716	-0.123288	1.16635	0.0419694	0.0935892
ENSMUSG00000027257	Pacsin3	549.976	0.799352	0.25257	-3.16487	0.00155151	0.0618271	-1.39543	-1.09843	-0.90573	-0.0941359	-0.440897	-0.639362
ENSMUSG00000015217	Hmgb3	170.63	1.51878	0.480551	-3.1605	0.00157501	0.0624227	-2.09474	#NAME?	-1.48651	-0.762436	-0.910697	-0.890049
ENSMUSG00000050714	Zbtb26	221.168	-1.25801	0.397944	3.16127	0.00157085	0.0624227	-0.645265	-0.802733	-2.55132	-2.71078	-2.31557	-2.52993
ENSMUSG00000025968	Ndufs1	3369.6	0.322943	0.102298	-3.1569	0.00159458	0.0630271	0.713891	0.78899	0.474023	0.953765	0.848927	0.907388
ENSMUSG00000002107	Celf2	3687.31	-0.362183	0.114892	3.15237	0.00161951	0.0634242	-0.328943	-0.558845	-0.444492	-0.882417	-0.907473	-0.845484
ENSMUSG00000030270	Cpne9	1132.83	0.763988	0.242363	-3.15225	0.00162017	0.0634242	0.076723	-0.206484	0.265225	0.53021	0.933464	0.800551
ENSMUSG00000032235	Ice2	172.888	-0.943511	0.299213	3.15331	0.00161428	0.0634242	-0.763458	-0.984316	-1.03004	-1.89316	-1.9256	-1.93146
ENSMUSG00000057572	Zbtb8os	133.243	-0.978987	0.310601	3.15192	0.00162202	0.0634242	-0.560079	0.159052	-0.755515	-1.64765	-1.33652	-1.30047
ENSMUSG00000021408	Ripk1	140.505	1.09037	0.346256	-3.14903	0.00163813	0.0634452	-0.725884	-1.82087	-1.22064	0.1748	-0.580016	-0.32935
ENSMUSG00000019254	Ppp1r12c	1047.11	0.692283	0.219708	-3.15093	0.00162754	0.0634452	-0.948764	-1.02725	-0.923128	-0.287572	-0.109688	-0.670233
ENSMUSG00000000296	Tpd52l1	131.839	-1.2842	0.408435	3.14419	0.0016655	0.0634452	2.05105	1.58892	1.43767	-0.219214	0.768717	0.504443
ENSMUSG00000021798	Ldb3	66.0207	-1.47551	0.468511	3.14936	0.00163626	0.0634452	0.743491	0.560236	1.011	-1.82855	-0.407866	-0.345115
ENSMUSG00000024219	Anks1	703.069	0.790834	0.251183	-3.14844	0.00164143	0.0634452	-1.51334	-1.3336	-1.90625	-0.739077	-0.4917	-1.42857
ENSMUSG00000036273	Lrrk2	752.997	0.69354	0.220536	-3.1448	0.00166201	0.0634452	0.267381	-0.23634	-0.285262	0.612845	0.697819	0.332857
ENSMUSG00000053414	Hunk	426.236	0.65248	0.207377	-3.14635	0.00165323	0.0634452	-0.312374	-0.961203	-0.649726	-0.0129061	-0.248232	0.113309
ENSMUSG00000028603	Scp2	1107.48	0.613564	0.195338	-3.14104	0.00168346	0.0634452	-0.500513	-0.616946	-0.405019	-0.0276714	-0.0719481	0.179552
ENSMUSG00000032249	Anp32a	2791.71	0.734127	0.233617	-3.14243	0.00167549	0.0634452	-0.548973	-0.825099	-1.01803	0.263763	-0.493587	-0.287293
ENSMUSG00000064225	Paqr9	956.376	-0.67931	0.216232	3.14157	0.00168042	0.0634452	-1.1823	-0.694755	-0.614596	-1.82911	-1.40751	-1.47629
ENSMUSG00000020684	Rasl10b	734.709	0.761664	0.242486	-3.14106	0.00168339	0.0634452	-2.77994	-3.4978	-3.66426	-2.7023	-2.58015	-2.47999
ENSMUSG00000018930	Ccl4	9.2942	-5.27993	1.67861	3.14542	0.00165851	0.0634452	6.69652	5.23974	4.63484	3.71082	0.332003	0.198528
ENSMUSG00000046562	Unc119b	461.839	0.723795	0.230306	-3.14275	0.0016737	0.0634452	-1.8306	-1.22654	-1.74659	-0.700607	-1.19908	-0.932958
ENSMUSG00000046229	Scand1	511.815	1.199	0.381043	-3.14662	0.00165168	0.0634452	4.77008	4.45401	5.08793	5.46663	5.64557	6.85875
ENSMUSG00000019828	Grm1	6184.66	0.6678	0.212923	-3.13635	0.00171066	0.064304	0.449078	0.246107	0.902201	0.918785	1.25529	1.19683
ENSMUSG00000040302	Rbm48	131.701	-0.911529	0.290956	3.13288	0.00173102	0.0644054	0.58911	0.0186288	-0.201043	-0.661002	-0.649099	-1.1384
ENSMUSG00000026103	Gls	3449.06	0.380786	0.121461	-3.13504	0.00171832	0.0644054	-1.11913	-1.0437	-1.08812	-0.714524	-0.817564	-0.799473
ENSMUSG00000048076	Arf1	2955.94	-0.416992	0.133069	3.13366	0.0017264	0.0644054	-0.714454	-0.433832	-0.701981	-1.18451	-1.1732	-0.988594
ENSMUSG00000034684	Sema3f	200.157	-1.327	0.423509	3.13335	0.00172823	0.0644054	1.97772	2.2393	1.17187	-0.807348	0.907183	0.652324
ENSMUSG00000030557	Mef2a	2687.34	-0.504573	0.161215	3.1298	0.00174923	0.0649173	-0.616251	-0.888048	-0.728158	-0.99387	-1.60483	-1.37175
ENSMUSG00000051786	Tubgcp6	746.263	0.708407	0.226848	-3.12283	0.0017912	0.0661384	-1.06623	-1.07102	-1.22249	-0.591898	-0.0557103	-0.843222
ENSMUSG00000054855	Rnd1	395.281	-0.625933	0.200403	3.12338	0.00178789	0.0661384	0.644769	0.823956	0.649404	0.20143	0.191634	-0.342701
ENSMUSG00000000766	Oprm1	32.2026	-2.46815	0.790596	3.12189	0.00179695	0.0661832	2.5378	5.0213	2.89512	0.0883949	1.13557	1.46063
ENSMUSG00000026031	Cflar	250.3	1.36532	0.438042	-3.11687	0.00182784	0.0671512	-4.34613	-6.9026	-3.5871	-3.07746	-3.50885	-2.9414
ENSMUSG00000029622	Arpc1b	287.097	0.753727	0.241892	-3.11596	0.00183344	0.0671878	-1.13516	-1.18417	-1.04012	-0.359998	-0.117147	-0.795193
ENSMUSG00000066438	Plekhd1	1577.35	0.93951	0.302013	-3.11083	0.00186561	0.0680249	-0.383641	-0.686726	0.420586	0.616878	0.541387	0.998545
ENSMUSG00000030417	Pdcd5	211.289	-0.910435	0.292636	3.11115	0.00186361	0.0680249	0.624241	-0.0601176	0.080554	-1.10604	-0.902332	-0.309124
ENSMUSG00000035215	Lsm7	153.041	1.10191	0.354694	-3.10665	0.00189219	0.0688218	-0.330067	-1.39075	-1.21299	0.578038	-0.434042	0.120367
ENSMUSG00000020142	Slc1a4	1194.55	-0.84693	0.272772	3.1049	0.00190343	0.0688947	0.0975799	1.01203	0.877242	0.10563	-0.66042	-0.165639
ENSMUSG00000000305	Cdh4	422.84	-0.738962	0.238001	3.10487	0.00190364	0.0688947	0.242557	0.601911	0.165624	-0.235747	-0.310969	-0.825926
ENSMUSG00000015947	Fcgr1	53.0431	2.07132	0.667375	-3.10369	0.00191124	0.0689987	-1.14963	-3.56556	-0.733428	0.677444	-0.456241	1.2906
ENSMUSG00000071862	Lrrtm2	576.354	-0.685381	0.220998	3.10129	0.00192676	0.0691217	-0.628399	-0.75665	-0.568004	-1.78439	-1.17962	-1.26769
ENSMUSG00000028669	Pithd1	711.084	-0.524003	0.168905	3.10235	0.0019199	0.0691217	0.307166	0.234813	0.0198192	-0.697185	-0.220529	-0.342088
ENSMUSG00000032812	Arap1	905.629	0.905509	0.292008	-3.10097	0.00192887	0.0691217	-0.798977	-0.33797	0.244481	0.580532	0.63162	0.496691
ENSMUSG00000028445	Enho	518.006	-0.96799	0.312232	3.10023	0.00193371	0.0691255	-0.513938	0.0670068	-1.02638	-1.90918	-1.32906	-1.29715
ENSMUSG00000032289	Thsd4	194.846	0.857704	0.276931	-3.09718	0.00195373	0.0695003	-0.822307	-1.79445	-1.17611	-0.6235	-0.274236	-0.386218
ENSMUSG00000030972	Acsm5	50.0925	2.34116	0.755804	-3.09757	0.00195115	0.0695003	-2.38496	-2.0155	-0.517336	0.517428	-0.414669	1.66204
ENSMUSG00000041974	Spidr	27.986	2.5094	0.811261	-3.09321	0.00198005	0.0699252	-1.16901	#NAME?	-3.56838	0.0462067	-0.17089	-0.172065
ENSMUSG00000028565	Nfia	1819.51	-0.890017	0.287715	3.0934	0.0019788	0.0699252	-0.187091	0.3912	-0.367943	-0.612616	-1.11269	-1.21042
ENSMUSG00000032368	Zic1	10129.3	-0.717256	0.231801	3.09428	0.00197291	0.0699252	-0.673147	-0.0514706	-0.628081	-1.27181	-1.42299	-0.942048
ENSMUSG00000021936	Mapk8	1154.69	-0.5282	0.170952	3.08975	0.00200323	0.0704182	-0.970207	-0.679731	-0.985388	-1.31453	-1.47059	-1.66568
ENSMUSG00000042208	0610010F05Rik	733.364	-0.495441	0.160353	3.08969	0.00200367	0.0704182	-0.157186	-0.250752	-0.65785	-1.04338	-0.745341	-0.967581
ENSMUSG00000030584	Dpf1	217.53	0.758691	0.245796	-3.08667	0.00202411	0.0709655	0.19941	0.0199585	-0.04484	0.502821	0.761004	0.927542
ENSMUSG00000028464	Tpm2	234.934	1.09184	0.353949	-3.08473	0.00203737	0.0712592	0.605946	-0.666746	0.481755	1.55819	1.27545	0.994672
ENSMUSG00000024810	Il33	102.13	-1.51238	0.490945	3.08055	0.00206618	0.0715802	0.459036	0.723021	-1.05245	-1.75302	-0.898384	-1.63283
ENSMUSG00000006057	Atp5g1	1664.44	-0.757009	0.245709	3.08092	0.00206361	0.0715802	0.0890515	0.246708	0.780086	-0.123544	-0.515742	-0.627424
ENSMUSG00000051034	Zfp11	91.7738	-1.1899	0.386169	3.08129	0.00206107	0.0715802	-0.342601	-0.243541	-0.694544	-1.69363	-1.6545	-1.72401
ENSMUSG00000039860	Srrm3	691.593	1.02701	0.333379	-3.08062	0.00206569	0.0715802	-1.50659	-0.981027	-0.873067	0.247803	-0.0151066	-0.835592
ENSMUSG00000061762	Tac1	115.26	-2.5706	0.835694	3.076	0.00209795	0.0720234	5.3304	3.69967	1.96337	0.00438315	0.701773	0.762676
ENSMUSG00000038984	Tspyl5	451.729	-0.609243	0.198033	3.07647	0.00209468	0.0720234	-0.245904	-0.0314039	-0.198672	-0.778549	-0.99545	-0.793673
ENSMUSG00000092083	Kcnb2	271.926	-1.33984	0.436188	3.07171	0.00212836	0.0720234	-0.204686	-0.312018	-2.19549	-2.49445	-1.67887	-2.56471
ENSMUSG00000047787	Flrt1	225.349	-0.935231	0.304407	3.07231	0.00212412	0.0720234	0.28134	0.953868	0.34434	-0.338637	-0.525194	-0.479534
ENSMUSG00000027834	Serpini1	3608.37	0.460754	0.149935	-3.07304	0.00211893	0.0720234	0.706754	0.348355	0.444597	0.854947	0.847315	0.963231
ENSMUSG00000073542	Cep76	3724	0.705159	0.229493	-3.07268	0.00212146	0.0720234	0.819095	0.0391493	0.660345	0.954153	1.19729	1.36309
ENSMUSG00000045246	Kcng4	1666.85	0.740388	0.240717	-3.07576	0.00209967	0.0720234	-1.13385	-1.66284	-0.72652	-0.742294	-0.494557	-0.258596
ENSMUSG00000016487	Ppfibp1	385.834	0.700303	0.227837	-3.0737	0.00211423	0.0720234	-0.379314	-0.821085	-0.908551	0.127712	-0.203729	-0.107551
ENSMUSG00000029438	Bcl7a	933.084	0.565282	0.183702	-3.07717	0.00208976	0.0720234	-0.674866	-1.21178	-0.874793	-0.646292	-0.392107	-0.229548
ENSMUSG00000030946	Lhpp	479.522	0.86653	0.282051	-3.07224	0.00212459	0.0720234	0.40631	-0.0289492	0.856441	1.5447	1.31059	0.897656
ENSMUSG00000018965	Ywhah	10497.9	1.04129	0.339405	-3.06799	0.00215507	0.0726909	-0.483058	-1.15266	0.166521	0.648107	0.447776	0.630648
ENSMUSG00000061536	Sec22c	390.778	-0.882756	0.28777	3.06757	0.00215805	0.0726909	-1.46329	-0.966205	-1.05796	-2.71029	-2.11799	-1.7457
ENSMUSG00000036745	Ttll7	3387.56	0.365364	0.119138	-3.06674	0.0021641	0.0727267	-0.985583	-1.07817	-0.94885	-0.677946	-0.679028	-0.782926
ENSMUSG00000047617	Paxx	463.473	0.650722	0.212684	-3.05957	0.00221657	0.0743188	-0.78673	-0.519537	-0.624765	-0.247799	-0.235598	0.251728
ENSMUSG00000067889	Sptbn2	15603.7	1.14824	0.37555	-3.05748	0.00223204	0.0744801	-0.288926	-1.51783	-0.0562777	0.463803	0.753115	0.298738
ENSMUSG00000000708	Kat2b	1148.87	0.682328	0.223212	-3.05686	0.0022367	0.0744801	-1.66992	-1.82537	-2.27172	-1.74874	-1.26439	-0.958175
ENSMUSG00000039630	Hnrnpu	7447.55	0.570131	0.18646	-3.05766	0.00223073	0.0744801	-0.70234	-0.933836	-0.904482	-0.112735	-0.379028	-0.588062
ENSMUSG00000020900	Myh10	5349.94	0.764106	0.250282	-3.05298	0.0022658	0.0747663	-0.459835	-1.06513	-0.276821	0.348336	0.144282	-0.228068
ENSMUSG00000052921	Arhgef15	214.756	0.969491	0.317482	-3.05369	0.00226043	0.0747663	-2.18151	-1.9966	-0.898065	-0.779362	-0.486085	-0.726275
ENSMUSG00000054723	Vmac	96.9204	1.55585	0.509293	-3.05493	0.00225114	0.0747663	-2.03083	-4.33283	-2.34833	-1.74951	-1.54525	-0.430298
ENSMUSG00000055725	Paqr3	260.889	-1.12409	0.368149	3.05336	0.00226295	0.0747663	1.00839	0.548711	1.03059	0.131252	-0.522271	-0.549928
ENSMUSG00000033955	Tnks1bp1	712.032	0.590201	0.193476	-3.05052	0.00228449	0.0752129	-0.244477	-0.728075	-0.140008	0.196267	0.366799	-0.080927
ENSMUSG00000038615	Nfe2l1	3188.3	-0.513321	0.168329	3.0495	0.0022922	0.0752967	-0.401228	-0.186179	-0.233653	-0.812114	-0.711323	-1.06259
ENSMUSG00000020994	Pnn	1119.45	0.712447	0.23389	-3.04608	0.00231846	0.0755078	-1.39487	-1.59522	-1.65997	-0.660588	-1.03578	-1.0805
ENSMUSG00000029821	Gsdme	340.139	-0.76169	0.250065	3.04597	0.00231933	0.0755078	-0.878961	-0.612045	-0.856624	-1.54834	-1.77991	-1.5169
ENSMUSG00000025477	Inpp5a	6844.58	0.453314	0.148799	-3.04649	0.00231532	0.0755078	0.529016	0.0370874	0.429911	0.703166	0.684571	0.756369
ENSMUSG00000027634	Ndrg3	8668.47	-0.579233	0.19005	3.04779	0.00230533	0.0755078	-0.140915	0.36047	0.00845336	-0.518121	-0.717417	-0.45463
ENSMUSG00000054519	Zfp867	166.506	-1.04994	0.344808	3.045	0.00232678	0.0755816	-0.666411	-1.07518	-2.11302	-2.53503	-2.43088	-2.1564
ENSMUSG00000050967	Creg2	138.906	-1.41634	0.46525	3.04426	0.00233251	0.0755993	1.07215	0.271165	-0.688487	-1.38734	-0.960898	-1.23569
ENSMUSG00000024268	Celf4	3924.25	-0.629721	0.207198	3.03922	0.00237192	0.0760543	-0.125574	0.249622	-0.35199	-1.09131	-0.592461	-0.626566
ENSMUSG00000024260	Sap130	747.836	-0.51291	0.168794	3.03867	0.00237624	0.0760543	0.425651	0.724754	0.736417	0.00327072	0.118997	-0.00858443
ENSMUSG00000038916	Soga3	1061.03	0.46656	0.153534	-3.03882	0.00237509	0.0760543	0.916195	0.590042	0.727883	1.43344	1.02665	0.963859
ENSMUSG00000026436	Elk4	296.357	-0.778388	0.25598	3.04081	0.0023594	0.0760543	-1.13526	-1.12348	-1.33799	-1.66649	-2.27766	-2.20073
ENSMUSG00000078578	Ube2d3	3045.08	-0.565316	0.185864	3.04156	0.00235356	0.0760543	-1.1912	-1.28578	-1.59332	-1.62064	-2.28906	-2.10614
ENSMUSG00000028757	Ddost	1693.68	-0.390649	0.128568	3.03847	0.00237784	0.0760543	1.67295	2.01789	1.74247	1.39892	1.3286	1.32631
ENSMUSG00000024218	Taf11	387.943	-0.594625	0.19578	3.0372	0.00238784	0.076207	0.249776	0.549241	0.0227567	-0.404871	-0.206622	-0.535692
ENSMUSG00000045519	Zfp560	134.006	-1.02813	0.338721	3.03533	0.00240273	0.076515	-0.341262	-0.506549	-0.986499	-1.81029	-1.69197	-1.62171
ENSMUSG00000007817	Zmiz1	4077.99	-0.623892	0.205695	3.03309	0.00242065	0.0769175	-0.488044	-0.303314	-0.32179	-0.805807	-1.10143	-1.31603
ENSMUSG00000028207	Asph	6352.66	0.506702	0.16727	-3.02924	0.0024517	0.077735	0.208507	0.057327	0.230425	0.846018	0.527371	0.390131
ENSMUSG00000031066	Usp11	1226.33	-0.462438	0.152702	3.02836	0.00245882	0.0777916	0.704755	0.670778	0.423458	0.065465	0.35429	-0.224753
ENSMUSG00000028883	Sema3a	601.879	0.785736	0.259589	-3.02684	0.00247121	0.0780144	0.475337	-0.149078	0.596797	0.978369	1.25298	0.844551
ENSMUSG00000018678	Sp2	329.311	-0.571374	0.188823	3.02598	0.00247832	0.0780696	0.855539	1.00597	0.922691	0.602028	0.135948	0.117981
ENSMUSG00000028165	Cisd2	866.968	-0.736996	0.243878	3.02199	0.00251117	0.0789342	-0.268526	0.1292	-0.888922	-1.21921	-1.11488	-1.0959
ENSMUSG00000019647	Sema6a	1227.47	-0.688033	0.227865	3.01947	0.00253217	0.079311	1.46798	0.956221	0.800781	-0.085783	0.594779	0.492617
ENSMUSG00000045838	Ccdc9b	71.3208	2.0127	0.666623	-3.01925	0.00253404	0.079311	#NAME?	#NAME?	-1.55367	-1.11085	-1.4237	-1.42656
ENSMUSG00000056812	St8sia3	1194.82	-0.696044	0.230795	3.01585	0.00256258	0.0796912	0.393292	0.344808	-0.240459	-0.82146	-0.362285	-0.536652
ENSMUSG00000066197	Gpr139	46.8114	-2.01616	0.668463	3.01611	0.00256041	0.0796912	1.78822	1.69092	1.43207	-1.47733	0.449403	-0.251218
ENSMUSG00000045790	Ccdc149	328.369	-0.98837	0.327837	3.01483	0.00257127	0.0797914	-0.481308	-0.0305247	-1.02823	-1.98579	-1.38678	-1.24217
ENSMUSG00000039680	Mrps6	276.159	1.02866	0.341421	-3.01287	0.00258793	0.080138	-0.318074	0.280223	0.811805	1.53155	0.699835	1.41096
ENSMUSG00000024507	Hsd17b4	1348.55	0.676324	0.224533	-3.01213	0.0025942	0.0801619	0.415086	0.202749	0.668816	1.36162	0.841338	0.928386
ENSMUSG00000091896	Ube2d2a	1101.01	-0.710445	0.23621	3.00768	0.00263247	0.0802666	-0.638378	-0.51944	-1.48075	-1.43388	-1.82029	-1.68538
ENSMUSG00000031111	Igsf1	227.324	-1.15788	0.38499	3.00756	0.00263356	0.0802666	1.77536	2.30506	1.26467	-0.215242	1.28458	0.482258
ENSMUSG00000024812	Tjp2	940.816	0.535494	0.178025	-3.00797	0.00263001	0.0802666	-0.569295	-0.537874	-0.124533	0.00201041	0.120805	0.0806604
ENSMUSG00000001053	N4bp3	186.525	0.71997	0.23941	-3.00726	0.00263611	0.0802666	0.0799621	-0.299625	-0.0318291	0.622933	0.774269	0.33438
ENSMUSG00000042320	Prox2	19.2831	-4.26952	1.41875	3.00934	0.00261812	0.0802666	-0.867894	#NAME?	-1.96145	#NAME?	#NAME?	#NAME?
ENSMUSG00000030615	Tmem126a	327.867	-0.901627	0.299733	3.0081	0.00262887	0.0802666	0.398012	0.876014	-0.249455	-0.351018	-0.760236	-0.683796
ENSMUSG00000027605	Acss2	1031.78	0.556662	0.185044	-3.00826	0.00262745	0.0802666	-0.0772662	0.110198	0.374806	0.781121	0.653709	0.462988
ENSMUSG00000029477	Morn3	5.56184	4.8306	1.60665	-3.00663	0.00264163	0.0802671	#NAME?	#NAME?	#NAME?	-0.122255	1.70341	2.20692
ENSMUSG00000042312	S100a13	368.737	0.778594	0.25914	-3.00453	0.00265987	0.0803648	1.22061	2.32943	1.64163	2.72989	2.23739	2.34983
ENSMUSG00000039103	Nexn	278.602	0.804344	0.267678	-3.00489	0.00265673	0.0803648	0.356727	-0.469263	-0.162127	0.7687	0.283601	0.916881
ENSMUSG00000004815	Dgkq	472.523	0.678017	0.225677	-3.00436	0.00266138	0.0803648	-0.606174	-0.341029	-0.564742	0.168182	0.294228	-0.177622
ENSMUSG00000069255	Dusp22	205.261	-0.716541	0.238602	3.00308	0.00267261	0.0805372	-0.0132399	-0.146581	0.0150549	-0.906607	-0.707754	-0.885771
ENSMUSG00000050963	Kcns2	230.83	-0.840709	0.28042	2.99804	0.00271725	0.0815041	-0.193684	-0.622145	-0.646172	-1.24798	-1.37053	-1.59056
ENSMUSG00000051811	Cox6b2	179.873	1.23428	0.411672	-2.99821	0.00271571	0.0815041	0.774682	1.57646	1.95567	2.98659	2.68623	1.97195
ENSMUSG00000036469	Marchf1	65.6766	-2.16044	0.72096	2.99661	0.00272998	0.0815041	-0.257858	#NAME?	-1.04051	-3.70565	-3.88362	-3.15739
ENSMUSG00000071054	Safb	1855.37	0.663067	0.221294	-2.99632	0.00273264	0.0815041	-0.517665	-0.485166	-0.330586	0.503099	0.0103639	-0.137835
ENSMUSG00000039943	Plcb4	5423.34	0.608805	0.203158	-2.99671	0.00272912	0.0815041	-0.216486	-0.606263	-0.102926	0.385293	0.258521	0.00150254
ENSMUSG00000020076	Ddx50	897.922	-0.580448	0.193891	2.99369	0.00275629	0.0819773	-0.790382	-0.759577	-1.38275	-1.39066	-1.58838	-1.92583
ENSMUSG00000057777	Mab21l2	54.1611	-1.42321	0.475466	2.9933	0.00275974	0.0819773	1.6934	2.69504	1.9863	0.414457	0.753794	0.763623
ENSMUSG00000011958	Bnip2	474.109	0.631618	0.211099	-2.99205	0.00277112	0.0821481	-1.59406	-2.14614	-1.84612	-1.15132	-1.29676	-1.41957
ENSMUSG00000004071	Cdip1	3154.56	-0.673268	0.225202	2.98962	0.00279329	0.082399	0.180938	0.500568	0.378593	-0.835166	-0.213375	-0.187484
ENSMUSG00000022545	Ercc4	497.131	0.469048	0.156976	-2.98803	0.00280784	0.082399	-0.184007	-0.162152	-0.0878704	0.199762	0.257395	0.280539
ENSMUSG00000003039	Fam32a	661.532	0.5557	0.185873	-2.98967	0.00279275	0.082399	-2.13591	-2.0079	-1.96967	-1.75117	-1.39365	-1.51663
ENSMUSG00000058881	Zfp516	292.433	0.996889	0.333553	-2.9887	0.00280167	0.082399	-1.0359	-1.97492	-0.625017	-0.143196	0.148648	-0.713743
ENSMUSG00000032897	Nfyc	754.321	-0.792638	0.265238	2.98841	0.00280434	0.082399	-0.433943	0.212115	-0.934107	-1.22066	-1.41975	-1.00939
ENSMUSG00000019359	Gdpd2	44.4104	-1.79511	0.601636	2.98371	0.00284774	0.0829026	0.853048	2.36278	0.998646	-0.790628	-0.363068	-0.0842214
ENSMUSG00000025889	Snca	1033.11	0.593973	0.198958	-2.98542	0.00283185	0.0829026	0.565577	-0.0860973	0.119214	0.910705	0.760919	0.513831
ENSMUSG00000024045	Akap8	1089.72	0.620795	0.207992	-2.98471	0.00283849	0.0829026	-2.10285	-2.13822	-2.02794	-1.34109	-1.62445	-1.63337
ENSMUSG00000026259	Ngef	345.183	-1.27336	0.426696	2.98424	0.00284283	0.0829026	2.6454	2.55964	1.16631	0.0360975	0.742907	1.29397
ENSMUSG00000022100	Xpo7	1415.83	-0.428036	0.143528	2.98225	0.00286137	0.0829817	0.152199	0.198811	-0.100025	-0.525642	-0.388436	-0.362033
ENSMUSG00000043091	Tuba1c	548.694	-0.803703	0.2695	2.9822	0.00286183	0.0829817	2.24708	2.35568	2.75483	1.82839	1.8988	0.913848
ENSMUSG00000054863	Tafa5	748.262	-1.12615	0.377787	2.98091	0.00287394	0.0831676	-1.40103	-0.716256	-2.22037	-3.03779	-2.24412	-2.40567
ENSMUSG00000027716	Trpc3	3026.05	0.691365	0.232261	-2.97667	0.00291399	0.0837971	0.572923	0.0881526	0.875003	1.2991	1.21408	0.917443
ENSMUSG00000032400	Zwilch	30.4765	-2.29023	0.769255	2.9772	0.00290891	0.0837971	-0.465968	1.73351	0.766578	-2.38254	-0.362321	-2.03952
ENSMUSG00000026347	Tmem163	1130.23	-0.715842	0.240413	2.97755	0.00290562	0.0837971	0.775849	1.51843	0.829997	0.241973	0.332405	0.286199
ENSMUSG00000042699	Dhx9	2787.17	0.43486	0.146173	-2.97497	0.00293017	0.0837971	-0.187809	-0.426955	-0.197147	0.395711	0.023548	-0.142275
ENSMUSG00000029054	Gabrd	2755.27	-0.981132	0.329787	2.97505	0.0029294	0.0837971	0.669051	1.79928	0.393807	0.201797	-0.339127	0.0593583
ENSMUSG00000078591	Hs3st4	39.5672	-3.23295	1.0865	2.97557	0.00292448	0.0837971	-0.310397	0.918851	-1.65781	-4.53012	-1.65658	#NAME?
ENSMUSG00000030223	Ptpro	294.719	-1.0879	0.365817	2.97388	0.00294055	0.0839295	1.74779	1.52199	0.679474	-0.393384	0.652544	0.236817
ENSMUSG00000025216	Lbx1	46.5125	1.65535	0.556762	-2.97317	0.00294739	0.083959	-0.711084	-0.244892	-0.10895	1.01832	0.732537	1.89103
ENSMUSG00000031661	Nkd1	303.019	-0.681469	0.229252	2.97258	0.0029531	0.083959	0.045741	-0.685201	-0.0673552	-0.885119	-0.848449	-1.16734
ENSMUSG00000022437	Samm50	1166.06	0.370201	0.124627	-2.97047	0.00297341	0.0843721	0.186763	-0.0308301	0.073304	0.381259	0.369707	0.380914
ENSMUSG00000025050	Pcgf6	203.92	0.928834	0.312825	-2.96918	0.00298598	0.0844003	-1.25573	-0.987048	-2.16471	-0.548019	-0.119598	-1.07856
ENSMUSG00000027498	Cstf1	410.852	-0.547736	0.184474	2.96918	0.00298593	0.0844003	0.921855	0.866501	0.620248	0.00242568	0.120473	0.344556
ENSMUSG00000006673	Qrich1	1673.49	-0.647153	0.218054	2.96786	0.00299882	0.0845992	0.923586	1.29409	0.445219	0.352812	-0.0834073	0.230709
ENSMUSG00000004098	Col5a3	123.987	1.38668	0.467927	-2.96344	0.00304221	0.0852243	-0.863936	-1.86385	-0.971791	-0.454479	0.741621	0.168223
ENSMUSG00000072596	Ear2	6.16849	-5.35371	1.8065	2.96358	0.0030408	0.0852243	6.28148	#NAME?	5.61267	2.74613	1.29706	-0.68847
ENSMUSG00000029049	Morn1	86.1811	1.08751	0.367076	-2.96263	0.00305019	0.0852243	-0.516845	-1.18094	-0.416687	0.181177	0.644448	0.257671
ENSMUSG00000039210	Gpatch2	289.29	0.718606	0.24255	-2.96271	0.00304946	0.0852243	-1.22137	-1.42444	-0.80533	-0.343877	-0.328177	-0.781787
ENSMUSG00000029641	Rasl11a	192.549	1.41332	0.477012	-2.96286	0.00304794	0.0852243	1.68607	0.00259604	0.972339	2.36697	1.36786	2.97276
ENSMUSG00000049313	Sorl1	15631.2	0.553072	0.186736	-2.96179	0.00305858	0.0852953	0.511589	0.458642	0.728605	1.04777	1.22872	0.810655
ENSMUSG00000021823	Vcl	696.738	0.720293	0.2434	-2.9593	0.00308341	0.0856602	1.03114	0.491413	0.651851	1.37406	1.40168	1.36077
ENSMUSG00000049184	Purg	286.501	0.759453	0.256601	-2.95966	0.00307978	0.0856602	-1.80144	-1.8578	-1.58932	-0.618896	-1.20584	-1.36352
ENSMUSG00000026003	Acadl	845.04	0.682725	0.230964	-2.95599	0.00311672	0.0864209	0.37615	0.121806	0.731545	1.15607	0.790382	1.16376
ENSMUSG00000031201	Brcc3	658.248	-0.481906	0.163077	2.95508	0.00312592	0.0865113	-0.177526	-0.014708	-0.190327	-0.649892	-0.803092	-0.645269
ENSMUSG00000044864	Ankrd50	801.684	-0.602453	0.204058	2.95237	0.00315348	0.0870575	-0.615232	-0.811989	-1.07777	-1.65107	-1.18051	-1.69096
ENSMUSG00000052496	Pkdrej	9.2167	4.61971	1.56513	-2.95165	0.00316084	0.0870575	#NAME?	#NAME?	-0.846552	1.02258	1.4091	1.63346
ENSMUSG00000033313	Fbxl8	15.106	2.46054	0.833999	-2.95029	0.00317473	0.0870575	-2.16224	#NAME?	0.489231	1.61188	1.36998	1.8034
ENSMUSG00000030987	Stim1	2058.87	0.566887	0.192126	-2.9506	0.00317161	0.0870575	0.340615	0.165299	0.687529	0.63975	0.966326	1.07296
ENSMUSG00000018541	Cwc25	285.323	1.02578	0.347696	-2.95022	0.0031755	0.0870575	-1.96569	-1.41408	-1.06517	-0.0593126	-0.72487	-0.592871
ENSMUSG00000046711	Hmga1	308.271	0.914668	0.310185	-2.94879	0.00319025	0.0871344	-2.32927	-2.78713	-1.83014	-1.56141	-1.6332	-1.19598
ENSMUSG00000030321	Efcab12	40.1195	1.88271	0.638442	-2.94891	0.00318897	0.0871344	-3.10634	-3.08065	-1.42371	-0.34367	0.0021794	-1.36498
ENSMUSG00000039156	Stim2	767.347	-0.458858	0.155672	2.9476	0.00320252	0.0873061	0.418405	0.392546	0.172148	-0.130073	-0.244555	-0.240259
ENSMUSG00000032766	Gng11	301.321	1.42166	0.482872	-2.94417	0.00323825	0.0881155	-0.848031	-0.189176	0.306361	2.11686	0.503554	0.916338
ENSMUSG00000041261	Car8	28507	0.629124	0.214371	-2.93475	0.0033382	0.0894994	0.139835	-0.299045	0.310892	0.844114	0.567966	0.458068
ENSMUSG00000020564	Atxn7l1	301.726	-0.657429	0.223764	2.93805	0.00330284	0.0894994	0.405096	-0.214898	0.249385	-0.51272	-0.721464	-0.526269
ENSMUSG00000030403	Vasp	339.696	0.565509	0.192639	-2.9356	0.00332908	0.0894994	0.408439	0.195622	0.0726774	0.880192	0.828524	0.490333
ENSMUSG00000033157	Abhd10	367.127	-0.592769	0.201794	2.93749	0.00330878	0.0894994	0.413753	0.481546	0.209667	-0.106073	-0.462537	-0.386815
ENSMUSG00000022000	Zc3h13	774.167	0.655298	0.223129	-2.93686	0.00331559	0.0894994	-1.63887	-1.36662	-1.40473	-0.778373	-0.60158	-1.28047
ENSMUSG00000053475	Tnfaip6	369.11	0.735533	0.250393	-2.93751	0.00330857	0.0894994	2.24343	2.68973	2.44625	2.70062	3.24764	3.38041
ENSMUSG00000028173	Wls	1693.69	0.55444	0.188916	-2.93486	0.00333702	0.0894994	0.863002	0.910197	1.06728	1.32385	1.48091	1.43885
ENSMUSG00000034265	Zdhhc14	1020.8	0.511379	0.174304	-2.93384	0.00334801	0.0895977	0.0154497	-0.183046	0.215344	0.488515	0.37889	0.510843
ENSMUSG00000061742	Slc22a12	17.2137	-2.97485	1.01444	2.93251	0.00336232	0.0898157	-0.321912	0.789024	-0.640216	-2.98655	-2.51601	-2.97243
ENSMUSG00000029467	Atp2a2	29863.1	0.477147	0.16277	-2.93141	0.00337425	0.0899698	0.624503	0.375818	0.757263	1.05986	1.10169	0.820599
ENSMUSG00000026087	Mrpl30	473.202	-0.512608	0.174956	2.92993	0.00339035	0.0900576	0.859456	0.812017	0.374274	0.0734429	0.237565	0.00230441
ENSMUSG00000031229	Atrx	3255.08	1.03567	0.353505	-2.92972	0.00339262	0.0900576	-2.03008	-2.6372	-2.69665	-1.08112	-1.32004	-2.26124
ENSMUSG00000031889	D230025D16Rik	440.894	-0.601328	0.205273	2.92941	0.00339607	0.0900576	0.679222	0.277468	0.301085	-0.211996	-0.108401	-0.421452
ENSMUSG00000038587	Akap12	1277.91	0.599517	0.204819	-2.92706	0.00342185	0.0901431	0.433356	-0.0821319	0.543335	0.927212	1.0291	0.496875
ENSMUSG00000024538	Ppic	183.547	0.963651	0.329108	-2.92807	0.00341072	0.0901431	0.857409	0.688473	0.739093	2.25848	1.73162	1.06767
ENSMUSG00000026029	Casp8	46.5707	1.82348	0.622942	-2.9272	0.0034203	0.0901431	-2.23231	-1.53638	0.979029	0.92768	1.02094	1.36992
ENSMUSG00000051451	Crebzf	724.115	0.976219	0.333538	-2.92686	0.00342402	0.0901431	-2.32697	-2.13743	-1.80765	-1.11178	-0.746085	-1.70501
ENSMUSG00000007721	Ccdc124	524.066	0.753807	0.257653	-2.92566	0.00343723	0.0903279	0.213831	0.0360194	0.660281	1.27331	0.73413	1.02922
ENSMUSG00000060882	Kcnd2	2844.27	-0.70406	0.240819	2.9236	0.0034601	0.0906023	-0.674519	0.0289618	-0.536872	-1.16671	-1.38367	-0.883546
ENSMUSG00000026622	Nek2	238.131	1.01674	0.347751	-2.92375	0.00345841	0.0906023	0.496846	0.150898	-0.218291	1.13801	0.879827	1.31161
ENSMUSG00000002341	Ncan	954.863	-0.7306	0.250024	2.92212	0.00347654	0.0908698	1.43026	1.48793	0.595708	0.172197	0.510845	0.42605
ENSMUSG00000049755	Zfp672	252.026	-0.974411	0.333632	2.92062	0.00349336	0.0911461	-1.15573	-0.69532	-1.93553	-2.21324	-1.73856	-2.82092
ENSMUSG00000026303	Mlph	170.384	0.876325	0.300108	-2.92003	0.00349993	0.0911545	-0.000888397	-0.433943	0.384485	0.764072	0.497851	1.10274
ENSMUSG00000035623	Rsf1	1127.79	0.780462	0.267497	-2.91765	0.00352679	0.0916901	-1.19287	-1.72692	-1.51215	-0.293158	-0.916917	-1.20728
ENSMUSG00000045319	Proser2	181.227	1.01574	0.34842	-2.91529	0.00355362	0.0918963	-0.220696	-1.03242	-0.0936377	0.328975	0.214124	1.0618
ENSMUSG00000020368	Canx	8628.98	0.317624	0.108929	-2.91588	0.00354689	0.0918963	1.08417	0.924213	0.760879	1.28194	1.08723	1.12857
ENSMUSG00000042473	Tbc1d8b	178.253	0.924118	0.31699	-2.91529	0.0035536	0.0918963	-0.508592	-0.623422	-0.724776	0.752215	-0.0348046	0.0592262
ENSMUSG00000042099	Kank3	290.149	0.963391	0.330898	-2.91144	0.00359765	0.0928703	0.293238	-0.724182	-0.151581	0.836711	0.8751	0.609617
ENSMUSG00000031939	Taf1d	237.948	1.12878	0.388209	-2.90767	0.00364136	0.0937137	-3.47324	-4.0749	-4.07292	-2.6791	-2.97231	-2.80728
ENSMUSG00000037111	Setd7	3741.58	0.571081	0.196416	-2.90751	0.00364317	0.0937137	-1.94606	-1.83861	-1.93572	-1.06185	-1.5955	-1.58467
ENSMUSG00000024456	Diaph1	572.717	0.517844	0.178171	-2.90644	0.00365569	0.0937877	-0.149936	-0.463145	-0.639701	-0.129319	0.234737	-0.00745316
ENSMUSG00000019969	Psen1	909.776	-0.642284	0.221008	2.90616	0.00365891	0.0937877	0.0565548	0.756859	0.0347375	-0.188941	-0.482767	-0.568505
ENSMUSG00000055900	Tmem69	136.076	-0.894955	0.308248	2.90336	0.00369182	0.0944652	0.685813	0.758988	0.333126	-0.846383	-0.245307	-0.200414
ENSMUSG00000067942	Zfp160	348.318	-0.885517	0.305331	2.90019	0.00372935	0.0950919	-1.31696	-1.39193	-2.31313	-2.63715	-2.11669	-3.11636
ENSMUSG00000037846	Rtkn2	47.4851	1.60958	0.554968	-2.9003	0.003728	0.0950919	-0.138995	-1.63221	-0.112737	0.451576	1.61196	1.12115
ENSMUSG00000041841	Rpl37	651.093	0.561561	0.19409	-2.8933	0.00381222	0.0955347	0.0374612	-0.104534	-0.281525	0.454611	0.223641	0.461663
ENSMUSG00000078816	Prkcg	9389.31	0.982621	0.339219	-2.89671	0.00377095	0.0955347	0.822762	0.276101	1.80226	1.92036	1.98035	1.90285
ENSMUSG00000008892	Vdac3	1924.43	-0.520309	0.179703	2.89538	0.00378698	0.0955347	-0.202242	-0.0346391	-0.602943	-0.502879	-1.11087	-1.02022
ENSMUSG00000040044	Orc3	986.745	-0.475981	0.164356	2.89604	0.00377908	0.0955347	-0.320811	-0.231027	-0.0111118	-0.456594	-0.799248	-0.959797
ENSMUSG00000027680	Fxr1	1127.72	0.586439	0.202672	-2.89354	0.00380923	0.0955347	-0.011623	-0.176696	-0.447297	0.617289	0.0534931	0.180815
ENSMUSG00000020954	Strn3	2615.59	0.422789	0.146045	-2.89492	0.00379249	0.0955347	0.248512	-0.186979	0.0990271	0.506398	0.322893	0.397285
ENSMUSG00000026782	Abi2	1740.74	-0.411328	0.142017	2.89634	0.00377545	0.0955347	-0.491491	-0.378439	-0.664639	-0.888687	-1.00926	-1.08584
ENSMUSG00000048483	Zdhhc22	163.031	-1.49485	0.516505	2.89417	0.00380167	0.0955347	0.678293	0.873999	-1.04945	-2.28939	-0.843135	-0.937332
ENSMUSG00000022044	Stmn4	2578.87	0.590565	0.204078	-2.89383	0.00380578	0.0955347	0.848286	0.795399	1.07825	1.60176	1.41556	1.26944
ENSMUSG00000038459	Abhd17c	343.397	-0.890773	0.307424	2.89754	0.00376102	0.0955347	0.273285	0.849437	0.377473	-0.433917	-0.821755	-0.138038
ENSMUSG00000046962	Zbtb21	367.204	-0.805893	0.278609	2.89256	0.00382117	0.0955948	-0.376909	0.0975462	0.28186	-0.519156	-1.03462	-1.0107
ENSMUSG00000022978	Mis18a	45.1595	1.73611	0.600438	-2.8914	0.00383525	0.0957471	-1.5825	#NAME?	0.340735	0.301636	0.494525	1.00171
ENSMUSG00000031299	Pdha1	2737.83	0.352395	0.12194	-2.88991	0.00385352	0.0957471	0.363637	0.129155	0.0464389	0.543986	0.369087	0.446183
ENSMUSG00000032262	Elovl4	1527.53	-0.633604	0.219233	2.89009	0.0038513	0.0957471	1.15622	0.895224	0.45273	-0.0245388	-0.0773271	0.395933
ENSMUSG00000028189	Ctbs	168.374	-0.814917	0.28193	2.8905	0.00384635	0.0957471	0.999822	1.7451	1.35515	0.810431	0.558229	0.114933
ENSMUSG00000068758	Il3ra	15.745	4.1652	1.44159	-2.88932	0.00386082	0.0957653	#NAME?	#NAME?	-2.93155	1.09666	0.109662	0.020822
ENSMUSG00000057396	Zfp759	120.128	-1.06001	0.36701	2.88823	0.00387413	0.0959325	-0.597161	-0.782278	-0.870398	-1.56698	-2.41517	-1.83264
ENSMUSG00000028035	Dnajb4	1078.07	0.738687	0.25583	-2.88741	0.00388426	0.0960203	0.0316966	-0.972454	-0.198694	0.396508	0.233323	0.371606
ENSMUSG00000038902	Pogz	1080.67	-0.501485	0.173983	2.88239	0.00394675	0.0973999	0.036871	0.351832	0.0210787	-0.26447	-0.399301	-0.612544
ENSMUSG00000047044	D030056L22Rik	237.693	0.887816	0.308194	-2.88071	0.00396782	0.0977546	-2.78623	-2.00278	-1.96703	-0.836134	-1.97007	-1.521
ENSMUSG00000024084	Qpct	174.159	-1.1179	0.388549	2.87712	0.00401324	0.0987068	2.81081	2.50053	2.05103	1.38157	1.27528	1.05187
ENSMUSG00000051517	Arhgef39	10.4942	4.67892	1.62907	-2.87214	0.00407697	0.0992698	#NAME?	#NAME?	#NAME?	#NAME?	0.81743	-0.510486
ENSMUSG00000030499	Kctd15	137.187	-1.11814	0.389265	2.87243	0.00407325	0.0992698	-1.41089	-0.448097	-1.99928	-2.16625	-2.70417	-2.3924
ENSMUSG00000036890	Gtdc1	271.991	-0.815097	0.283785	2.87224	0.00407576	0.0992698	-0.828543	-0.429185	-1.3441	-1.55338	-1.82125	-1.83451
ENSMUSG00000035620	Ric8b	605.19	-0.495283	0.172331	2.87403	0.00405274	0.0992698	-0.231392	-0.334354	-0.819019	-0.932518	-1.0259	-1.10934
ENSMUSG00000040220	Gas8	281.008	0.927118	0.322621	-2.87371	0.00405681	0.0992698	-1.00783	-1.35607	-1.04913	-0.0249996	-0.308472	-0.492022
ENSMUSG00000040297	Suco	818.598	-0.512325	0.178297	2.87344	0.00406034	0.0992698	-0.290348	-0.244767	-0.837495	-0.950521	-0.853868	-1.27427
ENSMUSG00000039375	Wdr17	110.824	-1.0625	0.370058	2.87116	0.00408975	0.099415	1.19692	0.374174	-0.317034	-0.635606	-0.528773	-0.845747
ENSMUSG00000029814	Igf2bp3	59.5916	3.70794	1.29238	-2.86907	0.00411674	0.0999047	#NAME?	#NAME?	#NAME?	-4.26739	-5.06395	-3.16012
ENSMUSG00000003623	Crot	553.132	0.565538	0.197348	-2.86569	0.00416102	0.100478	0.0830265	-0.575093	-0.120628	0.452579	0.40587	0.0944151
ENSMUSG00000038539	Atf5	522.562	0.907266	0.316529	-2.86629	0.00415307	0.100478	-1.55917	-0.865705	-0.827386	-0.0644103	-0.757292	0.160504
ENSMUSG00000041775	Mapk1ip1	267.42	-0.724231	0.252683	2.86616	0.00415482	0.100478	-0.81322	-0.864418	-0.657999	-1.95799	-1.54357	-1.34915
ENSMUSG00000020102	Slc16a7	389.26	-0.746736	0.260795	2.8633	0.00419251	0.101071	-1.24086	-1.80697	-1.50813	-2.1168	-2.50166	-2.35792
ENSMUSG00000040022	Rab11fip2	592.194	-0.632241	0.22098	2.86108	0.00422199	0.101613	-1.02441	-1.15869	-1.84362	-2.04783	-1.89961	-2.07299
ENSMUSG00000050295	Foxc1	128.422	0.96914	0.338997	-2.85884	0.00425188	0.102095	0.47731	-0.0614082	0.904839	1.75102	1.45713	1.11939
ENSMUSG00000049728	Zfp668	164.29	-0.800012	0.279868	2.85854	0.00425601	0.102095	0.122929	0.0913177	-0.539143	-1.05952	-0.835103	-0.96222
ENSMUSG00000035125	Gcfc2	128.235	0.899559	0.314964	-2.85607	0.00428917	0.102613	-0.646006	-0.775662	-0.989805	0.345964	-0.027083	-0.271959
ENSMUSG00000059920	4930453N24Rik	338.866	-0.919922	0.322114	2.85589	0.00429165	0.102613	-0.690827	-0.712307	-1.94454	-1.73855	-2.08314	-2.32553
ENSMUSG00000022504	Ciita	21.9391	3.94601	1.38215	-2.85499	0.00430382	0.102735	#NAME?	#NAME?	#NAME?	-1.2806	-1.58546	#NAME?
ENSMUSG00000029922	Mkrn1	1551.65	0.395019	0.138409	-2.85399	0.00431737	0.10289	-1.30721	-1.54002	-1.49991	-1.00191	-1.17128	-1.18769
ENSMUSG00000058246	Gm10037	35.0724	2.3621	0.827959	-2.85292	0.00433198	0.102902	-3.11308	#NAME?	-2.68494	-1.61249	-1.81892	-0.24553
ENSMUSG00000035842	Ddx11	45.7722	1.65199	0.578984	-2.85326	0.00432737	0.102902	-2.07105	-3.087	-2.13317	-0.273019	-0.71189	-1.09741
ENSMUSG00000026723	Trdmt1	93.6674	-0.948224	0.332435	2.85236	0.00433956	0.102915	-0.353891	-0.315566	-0.145803	-1.34693	-1.26336	-1.25272
ENSMUSG00000019785	Clvs2	148.807	-1.03434	0.363004	2.8494	0.00438016	0.103345	1.46478	1.70948	0.755238	-0.120282	0.349024	0.242705
ENSMUSG00000026864	Hspa5	9016.99	0.616418	0.216281	-2.85008	0.00437081	0.103345	1.25736	1.23141	0.537687	1.76117	1.67735	1.19586
ENSMUSG00000041476	Smpx	147.262	1.24965	0.438633	-2.84897	0.00438607	0.103345	-0.109003	-1.87041	-0.118188	0.882684	0.192363	1.10974
ENSMUSG00000037624	Kcnk2	272.479	-0.975608	0.342422	2.84914	0.00438375	0.103345	-0.657366	-0.00266079	-1.65232	-1.77476	-1.71212	-1.69337
ENSMUSG00000021824	Ap3m1	600.598	-0.596489	0.209612	2.84568	0.00443166	0.103796	-1.36149	-1.54496	-1.8465	-2.28808	-2.58903	-2.03031
ENSMUSG00000043811	Rtn4r	535.652	-0.834809	0.293358	2.8457	0.00443141	0.103796	0.45758	1.09675	0.738709	-0.425302	-0.110563	0.129628
ENSMUSG00000053799	Exoc6	401.986	-0.52888	0.18593	2.84452	0.0044479	0.103796	0.776235	0.898722	0.391279	0.330754	0.00129888	-0.0452916
ENSMUSG00000010376	Nedd8	1044.01	0.607747	0.213638	-2.84476	0.00444454	0.103796	0.931528	0.979717	0.971282	1.65234	1.07459	1.68245
ENSMUSG00000030555	Ttc23	52.5039	-1.54119	0.541758	2.84479	0.00444402	0.103796	-1.00974	-0.342109	-1.04611	-1.59549	-2.74886	-3.02837
ENSMUSG00000041697	Cox6a1	4074.02	0.689183	0.24227	-2.84468	0.00444554	0.103796	1.3987	1.30572	1.4685	1.7616	1.83492	2.5147
ENSMUSG00000020733	Slc9a3r1	744.925	0.58109	0.204349	-2.84362	0.00446044	0.103923	-0.152394	-0.141314	0.0545352	0.867342	0.0252949	0.379932
ENSMUSG00000039367	Sec24c	1560.41	-0.421108	0.148253	2.84047	0.00450478	0.104741	0.306467	0.590474	0.364027	-0.0274935	-0.0122547	-0.176095
ENSMUSG00000000776	Polr3d	213.565	0.699301	0.246268	-2.83959	0.00451713	0.104741	-0.84458	-0.438271	-0.527815	0.0199825	0.0218199	0.0759644
ENSMUSG00000037664	Cdkn1c	190.592	1.22011	0.429667	-2.83967	0.00451598	0.104741	0.849356	0.290052	1.65421	1.80507	1.7388	2.716
ENSMUSG00000038515	Grtp1	91.1431	1.17768	0.415247	-2.8361	0.00456682	0.105248	-0.973921	-1.26406	0.488264	1.15166	0.444045	0.497343
ENSMUSG00000028222	Calb1	26455.3	0.962189	0.339138	-2.83716	0.00455172	0.105248	0.87349	-0.248219	1.08835	1.74906	1.3449	1.56163
ENSMUSG00000029861	Fam131b	2531.23	-0.845092	0.298034	2.83556	0.00457459	0.105248	-1.0327	-0.449619	-1.32122	-2.18161	-1.79456	-1.41322
ENSMUSG00000025283	Sat1	605.569	0.778403	0.274512	-2.83559	0.00457416	0.105248	-1.02392	-1.32772	-2.02837	-0.954916	-0.922787	-0.417725
ENSMUSG00000043687	1190005I06Rik	7.02165	4.64081	1.6369	-2.83512	0.00458091	0.105248	#NAME?	#NAME?	#NAME?	0.724044	0.601749	3.41856
ENSMUSG00000040782	Cop1	671.841	-0.820087	0.28927	2.83502	0.00458229	0.105248	-2.54581	-1.95364	-3.15625	-3.30176	-3.58747	-3.30598
ENSMUSG00000030930	Chst15	406.17	0.728854	0.257257	-2.83317	0.00460884	0.105692	-0.759528	-0.81621	-0.745847	-0.216408	-0.179148	-0.0357556
ENSMUSG00000062785	Kcnc3	8750.24	0.691157	0.244138	-2.831	0.0046402	0.106077	-0.402411	-0.19154	0.412591	0.461607	0.64894	0.643854
ENSMUSG00000021144	Mta1	1004.87	-0.567225	0.200397	2.8305	0.00464746	0.106077	0.892074	1.279	0.671028	0.232691	0.560753	0.128561
ENSMUSG00000048388	Fam171b	2035.84	-0.678026	0.239467	2.83139	0.00463463	0.106077	-0.961221	-0.593047	-1.44789	-1.70352	-1.88301	-1.6031
ENSMUSG00000041571	Selenow	3764.4	0.460848	0.162845	-2.82998	0.00465514	0.106086	0.366664	0.442563	0.442456	0.7633	0.594893	1.04978
ENSMUSG00000093904	Tomm20	2017	-0.476571	0.168536	2.82771	0.00468823	0.106674	-1.49847	-1.81789	-1.54483	-2.30614	-2.01679	-2.16857
ENSMUSG00000031442	Mcf2l	2294.31	0.548824	0.194157	-2.8267	0.00470308	0.106845	-0.576814	-0.337344	-0.588708	-0.00906593	0.217195	-0.330878
ENSMUSG00000041132	N4bp2l1	335.326	-0.703026	0.248926	2.82423	0.00473939	0.107502	-0.612075	-0.648118	-0.913985	-1.97925	-1.50201	-1.20994
ENSMUSG00000020653	Klf11	105.634	-0.995972	0.352888	2.82235	0.00476734	0.107588	8.01879e-05	-8.7884e-07	0.460992	-0.975227	-0.880153	-0.759334
ENSMUSG00000034402	Kcnh5	115.144	-2.02481	0.717405	2.8224	0.00476654	0.107588	5.23205	3.3828	2.43475	-0.0716632	1.70315	1.89878
ENSMUSG00000073678	Pgap1	858.078	-0.621443	0.220238	2.82168	0.00477721	0.107588	0.0309927	0.284793	0.0403822	-0.715806	-0.417171	-0.566279
ENSMUSG00000028397	Kdm4c	558.772	0.6723	0.238278	-2.82149	0.00478006	0.107588	-0.358959	-0.755719	-0.786222	0.431456	-0.0999785	-0.455384
ENSMUSG00000025856	Pdgfa	203.68	-0.802844	0.284426	2.82268	0.00476238	0.107588	0.217004	0.86235	-0.319254	-0.783861	-0.231163	-0.767598
ENSMUSG00000001943	Vsig2	31.7495	-2.93006	1.03919	2.81956	0.00480902	0.108073	-0.6682	-0.179598	-3.44683	-5.3096	-4.37812	-3.48348
ENSMUSG00000002393	Nr2f6	209.088	0.855517	0.303665	-2.81731	0.00484283	0.108312	0.817629	0.0604104	0.696608	0.773117	1.6352	1.50918
ENSMUSG00000078584	AU022252	329.181	0.802561	0.284859	-2.8174	0.00484142	0.108312	-2.39905	-2.84117	-2.14145	-1.13618	-1.9613	-2.08634
ENSMUSG00000064246	Chil1	135.072	-1.31955	0.468444	2.81688	0.00484933	0.108312	1.65342	1.90223	0.54939	0.325121	-0.159733	-0.0856339
ENSMUSG00000030681	Mvp	242.551	0.604372	0.214473	-2.81794	0.00483336	0.108312	-0.314153	-0.470288	-0.573783	-0.146175	0.160756	0.197462
ENSMUSG00000071454	Dtnb	366.408	-0.619517	0.22013	2.81433	0.00488793	0.108329	-0.0419914	0.165725	0.0182247	-0.866811	-0.297759	-0.737449
ENSMUSG00000046598	Bdh1	1384.22	0.386638	0.137374	-2.81449	0.00488543	0.108329	0.364431	0.52316	0.376849	0.965298	0.604547	0.626152
ENSMUSG00000039706	Ldb2	125.666	-1.69865	0.603312	2.81554	0.00486952	0.108329	3.10479	2.1532	0.52821	-0.838697	0.800735	-0.063606
ENSMUSG00000041757	Plekha6	1150.66	0.530236	0.188436	-2.81388	0.00489469	0.108329	-0.932022	-1.58756	-1.1479	-0.650439	-0.835487	-0.774754
ENSMUSG00000039033	Tasp1	184.998	0.793242	0.281852	-2.81439	0.00488695	0.108329	-0.497638	-1.69052	-1.57544	-0.285293	-0.650347	-0.413123
ENSMUSG00000006205	Htra1	4159.93	0.670376	0.238139	-2.81507	0.00487671	0.108329	1.97486	1.80084	2.03585	2.2237	2.43385	2.92986
ENSMUSG00000024780	Cdc37l1	1918.33	0.501463	0.17828	-2.81278	0.00491152	0.108537	-1.75417	-1.54807	-1.88905	-1.39545	-1.39427	-1.16469
ENSMUSG00000028249	Sdcbp	2408.34	0.459445	0.163439	-2.81111	0.00493709	0.108937	-0.191232	-0.459328	-0.0551233	0.444196	-0.0326123	0.0503199
ENSMUSG00000037013	Ss18	565.702	-0.54435	0.193745	2.80962	0.00495999	0.10919	-0.86949	-1.01682	-1.00257	-1.33181	-1.84724	-1.57869
ENSMUSG00000028248	Pnisr	2559.04	0.806028	0.286954	-2.80891	0.00497101	0.10919	-2.30829	-2.52299	-3.30438	-1.68753	-2.02931	-2.25719
ENSMUSG00000074364	Ehd2	309.966	0.651775	0.232002	-2.80935	0.0049642	0.10919	0.727584	0.798448	0.439516	1.53133	1.2272	0.96802
ENSMUSG00000053716	Dusp7	386.156	-0.668428	0.238162	2.80661	0.00500659	0.109806	0.0890244	0.457832	0.127526	-0.310569	-0.348872	-0.924091
ENSMUSG00000030016	Zfp638	2163.43	0.568496	0.2026	-2.806	0.00501614	0.10985	-0.858749	-1.29723	-1.56389	-0.380446	-0.838106	-1.024
ENSMUSG00000026254	Eif4e2	652.98	0.503842	0.179597	-2.8054	0.00502537	0.109888	-0.654683	-0.541686	-0.990961	-0.101331	-0.334023	-0.476451
ENSMUSG00000113255	Tes3-ps	9.38893	3.97493	1.41741	-2.80436	0.00504164	0.110078	#NAME?	#NAME?	#NAME?	1.20811	-0.671782	-0.406018
ENSMUSG00000020451	Limk2	1016.51	0.521221	0.186105	-2.80068	0.00509954	0.110188	-1.3981	-1.78054	-1.79956	-1.25266	-0.93627	-1.39016
ENSMUSG00000001707	Eef1e1	399.406	-0.762937	0.272303	2.8018	0.00508191	0.110188	1.55969	0.780464	1.13179	0.678596	0.0812278	0.319301
ENSMUSG00000043702	Pde12	388.516	-0.678826	0.242302	2.80157	0.0050854	0.110188	0.256103	-0.250756	0.541557	-0.592129	-0.675518	-0.423835
ENSMUSG00000039183	Nubp2	437.134	0.699305	0.249564	-2.80211	0.00507696	0.110188	0.372112	0.300015	1.01136	1.13985	0.938078	1.46793
ENSMUSG00000030739	Myh14	1207.43	0.689827	0.246089	-2.80316	0.00506051	0.110188	-0.711027	-0.432206	-0.407034	0.204861	0.129433	-0.0117167
ENSMUSG00000014550	Rbsn	755.237	-0.565654	0.201945	2.80103	0.00509394	0.110188	-1.40924	-1.21814	-1.34548	-2.22173	-1.81927	-1.92222
ENSMUSG00000020166	Cnot2	1134.73	-0.48957	0.174725	2.80194	0.00507956	0.110188	-0.0204437	-0.0671694	-0.538768	-0.637619	-0.963908	-0.699561
ENSMUSG00000034064	Poglut1	549.175	-0.619366	0.221263	2.79923	0.00512254	0.110358	-0.302449	-0.0637771	-0.968665	-0.964168	-0.961115	-1.38729
ENSMUSG00000036966	Spryd3	1777.62	0.522688	0.186707	-2.79952	0.00511793	0.110358	0.148933	-0.390226	-0.240252	0.268318	0.328958	0.30208
ENSMUSG00000040479	Dgkz	8885.98	0.60248	0.215278	-2.79861	0.00513231	0.110405	-0.564748	-0.766593	-0.393974	-0.304948	0.0820522	0.114964
ENSMUSG00000022533	Atp13a3	1532.23	-0.512236	0.183112	2.7974	0.00515163	0.110658	-0.566862	-0.521577	-0.665128	-1.1404	-1.06116	-1.3046
ENSMUSG00000021180	Rps6ka5	1027.29	0.546172	0.195435	-2.79464	0.00519568	0.110997	-0.267878	-0.512828	-0.0195917	0.133697	0.383646	0.141168
ENSMUSG00000025094	Slc18a2	64.8538	-1.78202	0.637649	2.79468	0.00519514	0.110997	-2.95074	-1.37884	-1.28903	-3.25958	-4.02268	-3.63334
ENSMUSG00000025393	Atp5b	26085.3	0.416844	0.149165	-2.79451	0.00519785	0.110997	0.799583	0.725174	1.00542	1.30377	1.02812	1.2407
ENSMUSG00000090394	4930523C07Rik	67.0926	1.47477	0.5277	-2.79471	0.00519466	0.110997	-2.49909	-4.91376	-1.29846	-0.368186	-1.24027	-1.20051
ENSMUSG00000042203	Tbc1d22b	493.242	-0.498938	0.178597	2.79366	0.00521156	0.111127	-0.468519	-0.295877	-0.486328	-0.741396	-0.974382	-1.23485
ENSMUSG00000029401	Rilpl2	95.8693	1.10709	0.396423	-2.79269	0.00522711	0.111295	-0.640805	-1.36794	-1.35225	-0.0957373	-0.458178	0.295411
ENSMUSG00000033735	Spr	440.76	0.727785	0.26073	-2.79134	0.00524904	0.111586	0.743596	1.33839	1.43006	1.92053	1.44882	2.18994
ENSMUSG00000066000	Zfp979	43.31	3.65106	1.3082	-2.79091	0.00525607	0.111586	#NAME?	#NAME?	#NAME?	-4.67358	-2.31965	-3.59278
ENSMUSG00000027963	Extl2	1960.7	-0.54625	0.195789	2.78999	0.005271	0.111741	0.332633	0.348178	0.0405487	-0.255712	-0.72921	-0.211459
ENSMUSG00000031969	Acad8	669.906	0.708319	0.253923	-2.7895	0.00527892	0.111746	0.0578413	0.16802	0.0991936	0.216923	0.703174	1.1677
ENSMUSG00000033721	Vav3	284.613	0.641523	0.230085	-2.78819	0.00530031	0.11181	-0.183406	-0.226765	-0.384665	0.366784	0.114527	0.420124
ENSMUSG00000062963	Ufc1	777.141	0.438925	0.157439	-2.78791	0.00530493	0.11181	0.469769	0.558004	0.677584	0.930494	0.845028	1.01559
ENSMUSG00000025532	Crcp	272.552	-0.770676	0.276362	2.78864	0.00529292	0.11181	0.479732	0.946114	0.0931971	-0.00631676	-0.898083	-0.16546
ENSMUSG00000059811	Atl2	4179.75	0.441764	0.15856	-2.78609	0.00533479	0.111954	0.0682272	-0.273766	0.0395581	0.524694	0.227921	0.19535
ENSMUSG00000054901	Arhgef33	3045.07	0.582951	0.209213	-2.7864	0.00532967	0.111954	-0.130603	-0.469485	0.201152	0.239093	0.272299	0.631062
ENSMUSG00000046814	Gchfr	53.0488	1.29368	0.464181	-2.78702	0.00531958	0.111954	0.406018	1.80436	1.50288	2.18966	2.93566	2.71833
ENSMUSG00000062753	AI413582	273.534	-0.820072	0.294638	2.78332	0.00538056	0.112752	1.35904	1.54817	0.810838	-0.269965	0.786739	0.529093
ENSMUSG00000045205	Dpy19l4	817.07	-0.467851	0.168334	2.7793	0.0054477	0.113368	0.0679476	-0.385022	-0.570519	-0.928234	-0.686961	-0.864874
ENSMUSG00000027712	Anxa5	1228.57	0.620412	0.22321	-2.7795	0.00544429	0.113368	0.842635	1.05843	1.43018	2.08944	1.46577	1.49345
ENSMUSG00000035891	Cerk	3764.02	0.35872	0.129072	-2.77923	0.00544881	0.113368	-0.465601	-0.726071	-0.413194	-0.214938	-0.362989	-0.166833
ENSMUSG00000070695	Cntnap5a	364.241	-0.92986	0.334431	2.78042	0.0054288	0.113368	1.53967	0.591959	0.255079	-0.591712	0.119342	-0.159487
ENSMUSG00000027296	Itpka	1020.69	0.923553	0.332177	-2.78031	0.00543074	0.113368	0.455025	0.0310563	1.26017	1.63953	1.28324	1.62297
ENSMUSG00000058966	Tlcd3b	1056.72	-0.612037	0.220323	2.77791	0.00547094	0.113666	-0.412786	0.154309	-0.065967	-1.09573	-0.669517	-0.570364
ENSMUSG00000022195	6030458C11Rik	543.997	-0.595869	0.215129	2.76983	0.00560858	0.115361	-0.191278	0.335704	-0.0281624	-0.25069	-0.998357	-0.671297
ENSMUSG00000009569	Mrtfb	689.853	-0.489696	0.176708	2.77122	0.00558473	0.115361	-0.0835206	0.139293	0.317312	-0.524402	-0.263564	-0.491392
ENSMUSG00000028337	Coro2a	313.984	-1.01147	0.365139	2.7701	0.00560386	0.115361	-0.785161	-0.437715	-0.688009	-2.78114	-0.911441	-1.66189
ENSMUSG00000029778	Adcyap1r1	1914.59	-0.47865	0.172804	2.76991	0.00560725	0.115361	-0.703517	-0.108305	-0.317081	-0.858423	-0.855153	-1.02873
ENSMUSG00000030091	Nup210	825.084	-0.805902	0.291001	2.76941	0.00561577	0.115361	0.665015	0.771601	0.857364	-0.447673	0.459702	-0.530686
ENSMUSG00000037907	Ankrd13b	584.476	0.798167	0.288124	-2.77023	0.00560175	0.115361	-1.5822	-1.71298	-1.6289	-1.30873	-0.400746	-1.07613
ENSMUSG00000028878	Fam76a	422.39	-0.662598	0.239251	2.76946	0.00561492	0.115361	-1.20789	-0.99503	-1.32634	-2.07914	-1.95414	-1.76883
ENSMUSG00000036687	Tmem184a	11.2606	-3.88168	1.40072	2.77119	0.00558511	0.115361	-1.03958	2.86989	0.556604	-1.96181	-1.24621	#NAME?
ENSMUSG00000035847	Ids	2827.74	-0.692958	0.250287	2.76865	0.00562891	0.115468	-1.08097	-0.884288	-1.57029	-2.18134	-1.85696	-1.79414
ENSMUSG00000045625	Pigz	201.252	-0.726122	0.262531	2.76585	0.00567745	0.1163	1.2767	1.46418	1.44128	-0.0177948	0.76369	0.887317
ENSMUSG00000021846	Peli2	644.853	-0.66529	0.240663	2.76441	0.00570266	0.116653	-1.31439	-1.39802	-1.60436	-2.06255	-2.32291	-2.14432
ENSMUSG00000035469	Rcbtb1	599.038	-0.626034	0.226591	2.76284	0.0057301	0.11705	-1.26073	-1.01599	-1.81549	-2.20644	-1.68313	-2.19634
ENSMUSG00000006676	Usp19	2434.9	0.291075	0.105402	-2.76158	0.00575232	0.117339	-0.138205	0.00334361	-0.167763	0.268131	0.0918813	-0.00778065
ENSMUSG00000047786	Lix1	99.0018	-1.69012	0.612309	2.76024	0.0057759	0.117656	-0.984672	0.535593	-1.46252	-1.50002	-2.18751	-2.53171
ENSMUSG00000041205	Map6d1	720.178	-0.512106	0.185666	2.75821	0.00581181	0.117892	-1.68976	-1.26643	-1.38738	-1.83186	-2.1929	-2.08113
ENSMUSG00000049504	Proser1	579.512	-0.505071	0.183202	2.7569	0.00583516	0.117892	0.259787	0.1502	0.412137	-0.461002	-0.329946	-0.159426
ENSMUSG00000030042	Pole4	298.438	1.01463	0.368039	-2.75686	0.00583598	0.117892	-1.01652	-2.16111	-0.298197	0.143585	-0.0655773	-0.1431
ENSMUSG00000047141	Zfp654	533.719	-0.506702	0.18374	2.75771	0.0058207	0.117892	-0.590661	-0.87032	-0.984769	-1.14232	-1.42275	-1.61921
ENSMUSG00000027313	Chac1	298.027	-0.715481	0.259429	2.75791	0.00581723	0.117892	0.728578	1.35425	1.05012	0.480207	0.0924578	0.265283
ENSMUSG00000025145	Lrrc45	402.113	1.37193	0.497583	-2.7572	0.00582991	0.117892	-1.7173	-1.82464	-3.46869	-0.987592	-0.515447	-1.76335
ENSMUSG00000038412	Higd1a	864.576	0.588026	0.213471	-2.75459	0.00587652	0.118546	-0.162062	-0.350155	-0.630314	0.0917449	0.0404012	0.195055
ENSMUSG00000024347	Psd2	3904.3	0.649085	0.235704	-2.75382	0.00589041	0.118663	-0.257383	-0.397909	0.430946	0.575987	0.386833	0.619109
ENSMUSG00000052616	Terb1	7.3067	-4.51844	1.64124	2.75307	0.00590391	0.11877	-0.0864134	1.38646	#NAME?	#NAME?	#NAME?	#NAME?
ENSMUSG00000090019	Gimap1	24.5544	2.14305	0.779306	-2.74994	0.00596061	0.119581	#NAME?	-0.406333	1.35258	1.58592	1.70493	2.00419
ENSMUSG00000040177	2310057M21Rik	404.609	-0.576846	0.209749	2.75018	0.00595627	0.119581	0.248002	0.511918	-0.233033	-0.32461	-0.720273	-0.380233
ENSMUSG00000021820	Camk2g	1920.14	-0.692655	0.252223	2.7462	0.00602902	0.119958	0.228489	0.55589	0.359544	-0.75138	-0.317916	-0.0929449
ENSMUSG00000036611	Eepd1	344.162	0.588626	0.214172	-2.74838	0.00598914	0.119958	-0.00636708	-0.315551	-0.106985	0.733988	0.213771	0.180604
ENSMUSG00000001962	Fam50a	393.296	0.728609	0.265336	-2.74599	0.00603287	0.119958	0.106871	0.0947664	0.300069	0.864079	0.535346	1.07473
ENSMUSG00000043923	Ccdc84	126.565	1.17977	0.42963	-2.74601	0.00603256	0.119958	-2.09997	-1.892	-2.65134	-1.22375	-0.448998	-1.79587
ENSMUSG00000056553	Ptprn2	2085.82	-0.624389	0.227432	2.74539	0.00604384	0.119958	1.00879	1.12319	0.525681	-0.0300469	0.637606	0.022548
ENSMUSG00000019894	Slc6a15	1352.31	-0.633944	0.230733	2.74752	0.00600474	0.119958	-0.00349247	0.137403	-0.212459	-0.602094	-0.958261	-0.63113
ENSMUSG00000026585	Kifap3	4403.36	0.42436	0.15453	-2.74613	0.00603033	0.119958	0.293259	0.117115	0.203352	0.689467	0.590415	0.389378
ENSMUSG00000000125	Wnt3	408.393	0.720419	0.262417	-2.74532	0.00604518	0.119958	0.813925	0.499228	1.48272	1.62131	1.65502	1.62913
ENSMUSG00000034098	Fstl5	613.324	-0.694708	0.253225	2.74345	0.00607981	0.120481	0.49173	0.980714	-0.114206	-0.376185	-0.119935	-0.409967
ENSMUSG00000040028	Elavl1	1294.09	-0.505694	0.184534	2.74038	0.00613683	0.120502	-0.0510271	0.0367358	0.282167	-0.363256	-0.494574	-0.587732
ENSMUSG00000034157	Cipc	1266.4	-0.408762	0.149133	2.74092	0.00612679	0.120502	-1.21509	-0.823502	-1.14156	-1.64876	-1.49975	-1.47949
ENSMUSG00000041747	Utp15	418.383	-0.537151	0.195993	2.74066	0.00613161	0.120502	-0.208198	0.15251	-0.0748646	-0.405908	-0.548472	-1.00571
ENSMUSG00000034709	Ppp1r21	1090.44	-0.360152	0.131429	2.74028	0.00613869	0.120502	0.0943718	0.0178204	-0.00610838	-0.372134	-0.355328	-0.460205
ENSMUSG00000018379	Srsf1	2171.21	0.699951	0.255256	-2.74215	0.00610385	0.120502	-2.61815	-2.78982	-2.66938	-1.65066	-2.08976	-2.45982
ENSMUSG00000029550	Sppl3	851.879	-0.620967	0.22646	2.74206	0.00610548	0.120502	0.32626	0.482386	0.41188	-0.501881	-0.480935	-0.0014229
ENSMUSG00000030685	Kctd13	721.07	-0.387619	0.141365	2.74198	0.00610703	0.120502	1.31337	1.28318	1.04325	0.797897	0.577125	0.851533
ENSMUSG00000017119	Nbr1	3346.23	0.295193	0.107802	-2.73829	0.00617599	0.121071	-0.455682	-0.435245	-0.382784	-0.11091	-0.302287	-0.196883
ENSMUSG00000028161	Ppp3ca	10677.6	-0.550806	0.201284	2.73646	0.00621045	0.121583	-0.256674	0.0854574	-0.462565	-0.606592	-0.974902	-0.888412
ENSMUSG00000039841	Zfp800	378.629	-0.61815	0.226195	2.73282	0.00627947	0.12277	0.481207	0.236107	-0.0887465	-0.344291	-0.552525	-0.525808
ENSMUSG00000031078	Cttn	1222.52	0.442147	0.161848	-2.73187	0.00629762	0.12296	-0.632342	-0.694205	-0.5415	-0.313317	-0.0702037	-0.343
ENSMUSG00000030688	Stard10	478.973	-0.612051	0.224202	2.72991	0.00633515	0.123527	-0.0505811	0.156647	-0.410839	-0.696685	-0.913757	-0.701069
ENSMUSG00000052384	Nrros	85.1708	-1.17127	0.429277	2.72847	0.00636285	0.123801	0.360065	1.22086	1.09136	-1.09356	-0.135986	0.14576
ENSMUSG00000049583	Grm5	552.443	-1.40755	0.515909	2.7283	0.00636619	0.123801	2.03602	1.24149	-0.0669706	-1.42595	0.117387	-0.269779
ENSMUSG00000033938	Ndufb7	1289.93	0.440932	0.161663	-2.72748	0.00638198	0.123943	1.55727	1.87709	1.54681	2.16481	1.82458	2.07875
ENSMUSG00000033386	Frrs1	31.2833	-1.68314	0.617223	2.72695	0.00639225	0.123958	1.00745	1.66992	0.179182	-1.13293	-1.2332	-0.31318
ENSMUSG00000017764	Zswim1	326.335	-0.882687	0.323736	2.72656	0.00639975	0.123958	0.912836	1.41023	1.6738	0.2817	0.730805	0.233286
ENSMUSG00000039977	Deup1	6.18494	-5.27688	1.93666	2.72473	0.00643532	0.124105	5.38988	4.16413	#NAME?	#NAME?	-0.75917	#NAME?
ENSMUSG00000024387	Csnk2b	1831.3	-0.330857	0.121392	2.72551	0.00642014	0.124105	1.68712	1.89909	1.74166	1.53061	1.32907	1.25907
ENSMUSG00000048758	Rpl29	720.823	-1.02048	0.374566	2.72442	0.00644138	0.124105	-0.210709	0.0781652	-1.09589	-1.02102	-1.48685	-1.89663
ENSMUSG00000027285	Haus2	320.344	-0.614133	0.225397	2.72468	0.00643642	0.124105	-0.234373	-0.145258	-0.145127	-0.897463	-0.694347	-0.973599
ENSMUSG00000046699	Slitrk4	1078.18	-0.60588	0.22269	2.72073	0.00651374	0.124547	0.000256532	0.351545	-0.303054	-0.6935	-0.715177	-0.540811
ENSMUSG00000078716	Tmem8b	573.723	-0.597025	0.219366	2.7216	0.00649671	0.124547	-0.14401	0.253355	-0.187673	-0.727331	-0.349352	-0.965405
ENSMUSG00000098176	Ccdc166	127.89	-1.02496	0.376732	2.72066	0.00651513	0.124547	-0.747925	1.02815	0.231631	-1.21481	-0.74193	-0.610269
ENSMUSG00000070806	Zmynd12	7.3933	3.65437	1.34294	-2.72117	0.00650521	0.124547	-0.120933	#NAME?	-0.309234	3.57224	1.29706	2.99589
ENSMUSG00000017286	Glod4	949.656	0.443309	0.162943	-2.72064	0.00651556	0.124547	0.316147	0.866465	0.583442	1.01495	0.940605	0.933766
ENSMUSG00000061718	Ppp1r1b	1773.55	0.924563	0.339749	-2.72131	0.00650234	0.124547	-0.249196	-0.407709	0.803902	0.744855	0.751333	1.44815
ENSMUSG00000026975	Dph7	260.156	-0.692786	0.25481	2.71883	0.00655129	0.124577	0.210045	0.627436	-0.195519	-0.811341	-0.57949	-0.291772
ENSMUSG00000042390	Gatad2b	1912.58	-0.525351	0.193138	2.72008	0.00652659	0.124577	0.220616	0.178958	0.311522	-0.356274	-0.624036	-0.0948058
ENSMUSG00000091705	H2-Q2	12.4992	-3.44141	1.26563	2.71913	0.0065453	0.124577	6.69652	1.04665	3.41884	-1.88351	1.64207	0.421566
ENSMUSG00000005533	Igf1r	1138.81	0.503753	0.185273	-2.71897	0.00654848	0.124577	-0.464748	-0.558697	-0.260219	-0.283045	0.0988689	0.181048
ENSMUSG00000019809	Pex3	368.585	-0.571215	0.21022	2.71723	0.00658312	0.124778	0.103199	0.437011	0.210299	-0.189506	-0.583337	-0.415813
ENSMUSG00000001419	Mef2d	2339.08	-0.423897	0.156085	2.71581	0.00661144	0.124778	-0.642853	-0.499336	-0.301609	-0.964137	-0.94864	-1.0186
ENSMUSG00000033327	Tnxb	90.5216	1.61491	0.594482	-2.71651	0.0065975	0.124778	-1.38664	-2.31081	-1.95391	-0.0745257	0.381412	-1.5509
ENSMUSG00000075376	Rc3h2	1436.98	-0.504295	0.18555	2.71784	0.00657096	0.124778	-0.786621	-1.02752	-1.22861	-1.60998	-1.41151	-1.7286
ENSMUSG00000031952	Chst5	18.3918	-2.29595	0.845147	2.71663	0.00659505	0.124778	1.82554	2.26751	1.62937	#NAME?	0.518166	0.044065
ENSMUSG00000028914	Casp9	389.367	0.753945	0.277622	-2.71572	0.00661318	0.124778	-1.05085	-1.70118	-0.726447	-0.40055	-0.627024	-0.270045
ENSMUSG00000067931	Zfp948	153.621	-0.955576	0.351997	2.71472	0.00663312	0.124884	-0.728035	-1.30474	-1.66306	-2.14668	-2.29254	-2.33335
ENSMUSG00000087006	Gm13889	373.74	1.0255	0.377775	-2.71458	0.00663596	0.124884	0.927521	1.02126	1.53084	1.90313	1.93858	2.77882
ENSMUSG00000032468	Armc8	1494.9	-0.36251	0.133572	2.71396	0.00664852	0.12496	0.0577312	0.152078	-0.0442302	-0.263804	-0.552072	-0.343091
ENSMUSG00000062184	Hs6st2	743.972	-0.650899	0.239985	2.71225	0.00668289	0.125444	0.540749	1.00498	0.178976	-0.376221	-0.0503241	-0.042346
ENSMUSG00000057101	Zfp180	552.718	-0.865813	0.319345	2.71122	0.00670371	0.125673	-2.18217	-2.03951	-2.64591	-3.49801	-3.16851	-3.11296
ENSMUSG00000045854	Lyrm2	177.388	-0.751992	0.277611	2.7088	0.00675278	0.126268	1.68707	1.24329	0.71569	0.815905	0.211048	0.167326
ENSMUSG00000060534	Dcc	93.9386	-1.17657	0.43432	2.70899	0.0067489	0.126268	1.8625	1.81418	1.6397	-0.113	1.27321	0.474481
ENSMUSG00000022525	Plaat1	118.953	-1.11975	0.413628	2.70713	0.00678668	0.126461	0.133088	0.110066	-0.348571	-2.50096	-0.822777	-0.84487
ENSMUSG00000042401	Crtac1	261.933	-0.996223	0.368028	2.70692	0.00679104	0.126461	2.41319	2.57675	1.52312	0.619067	1.88688	0.948937
ENSMUSG00000026873	Phf19	22.4989	-2.29935	0.849539	2.70659	0.00679778	0.126461	-0.116296	0.0990696	-1.24283	-1.4974	-3.24409	-4.00819
ENSMUSG00000028268	Gbp3	95.8557	-1.37017	0.506087	2.70739	0.00678152	0.126461	-1.27278	-0.416662	0.486537	-1.70524	-2.24324	-1.66046
ENSMUSG00000022762	Ncam2	1332.94	-0.562941	0.208067	2.70557	0.00681865	0.126554	1.40561	1.2925	1.01297	0.281789	0.864986	0.707109
ENSMUSG00000052911	Lamb2	1250.23	0.556651	0.205748	-2.7055	0.00682011	0.126554	1.21856	1.5884	1.8982	2.09486	2.04646	1.97584
ENSMUSG00000031143	Ccdc22	319.188	-3.41503	1.26536	2.69886	0.00695776	0.12728	12.1477	10.4346	11.9256	8.52874	9.74734	8.47968
ENSMUSG00000039148	Sart1	879.769	0.565917	0.20953	-2.70089	0.00691549	0.12728	-0.115982	-0.69809	-0.0331375	0.388962	0.172645	0.185574
ENSMUSG00000028467	Gba2	1103.81	0.417593	0.154665	-2.69998	0.00693434	0.12728	0.0285264	0.145344	-0.150025	0.300611	0.436994	0.314171
ENSMUSG00000015575	Atp6v0e	515.838	0.912268	0.338069	-2.69847	0.00696595	0.12728	0.252146	0.509596	0.394949	0.563648	0.977301	1.86576
ENSMUSG00000024539	Ptpn2	634.356	0.542682	0.200867	-2.7017	0.00689865	0.12728	-0.0931669	-0.539335	-0.250464	0.360552	0.0412095	0.171343
ENSMUSG00000033007	Asic4	132.608	-1.80914	0.670172	2.69952	0.00694396	0.12728	4.35099	3.48921	1.53934	0.298621	1.69003	1.3043
ENSMUSG00000028717	Tal1	45.1085	-2.0737	0.76804	2.69998	0.00693427	0.12728	-0.168049	2.04279	-0.273997	-2.42455	-1.15127	-1.51621
ENSMUSG00000008730	Hipk1	2685.87	-0.597554	0.221282	2.70041	0.00692532	0.12728	-0.635971	-0.359194	-0.620737	-1.37137	-1.17891	-1.0741
ENSMUSG00000039728	Slc6a5	676.777	0.440589	0.163317	-2.69775	0.00698098	0.12728	0.35897	0.132837	0.282584	0.504511	0.604121	0.727884
ENSMUSG00000040260	Daam2	955.259	0.424581	0.157384	-2.69773	0.00698144	0.12728	-0.986884	-1.08031	-1.13401	-0.794607	-0.55147	-0.786887
ENSMUSG00000028132	Tlcd4	1338.65	-0.425022	0.157273	2.70244	0.00688317	0.12728	-2.1648	-2.14059	-2.16565	-2.44928	-2.82044	-2.74012
ENSMUSG00000040133	Gpr176	156.226	-0.827372	0.30611	2.70286	0.0068745	0.12728	-0.167481	0.644308	-0.0603068	-0.76665	-0.983918	-0.555257
ENSMUSG00000030811	Fbxl19	362.548	0.714574	0.264455	-2.70206	0.00689108	0.12728	-1.65103	-1.28557	-2.01843	-1.17868	-0.591083	-1.19558
ENSMUSG00000017861	Mybl2	9.65958	-4.21477	1.56161	2.69899	0.00695504	0.12728	-1.24997	1.59367	#NAME?	#NAME?	-2.2264	#NAME?
ENSMUSG00000022521	Crebbp	2047.4	-0.551534	0.204649	2.69503	0.00703819	0.127448	1.20737	1.33267	0.933089	0.483777	0.780483	0.342899
ENSMUSG00000031137	Fgf13	556.669	-0.675772	0.250668	2.69589	0.00702006	0.127448	0.527384	0.165237	0.178388	-0.874061	-0.167191	-0.284343
ENSMUSG00000009293	Ube2g2	363.347	0.499851	0.185487	-2.6948	0.00704306	0.127448	-0.667009	-0.209095	-0.275265	0.150581	-0.11197	0.078242
ENSMUSG00000056851	Pcbp2	3324.9	-0.503763	0.186913	2.69518	0.00703506	0.127448	0.610264	0.876727	0.716824	0.51172	-0.144463	0.0754303
ENSMUSG00000026339	Ccdc93	342.32	0.67679	0.25103	-2.69605	0.00701666	0.127448	-1.63008	-1.68325	-2.22758	-0.884141	-1.07916	-1.75082
ENSMUSG00000005374	Tbl2	590.249	-0.717109	0.265975	2.69615	0.00701451	0.127448	-0.749527	0.255878	0.0267684	-0.611225	-1.08028	-1.03711
ENSMUSG00000025370	Cdh9	75.5815	-1.32635	0.492493	2.69313	0.00707837	0.127928	2.54758	2.11708	1.91167	-0.15588	0.866025	1.34054
ENSMUSG00000043999	Gpr75	178.17	-0.703977	0.261515	2.69192	0.00710421	0.128144	-0.194907	-0.243782	-0.515857	-1.67383	-0.773842	-0.9649
ENSMUSG00000011960	Ccnt1	916.968	-0.569061	0.211409	2.69175	0.00710789	0.128144	-0.906648	-0.576275	-0.64369	-0.914856	-1.47831	-1.63068
ENSMUSG00000025738	Fbxl16	3303.76	-0.51353	0.190828	2.69106	0.00712252	0.128249	-0.748949	-0.249889	-0.324375	-1.1224	-1.06234	-0.855849
ENSMUSG00000038784	Cnot4	573.776	-0.508648	0.189065	2.69033	0.00713816	0.128372	0.0935613	0.151877	0.281761	-0.235379	-0.47136	-0.493945
ENSMUSG00000054499	Dedd2	305.253	0.639431	0.237772	-2.68926	0.00716109	0.128626	-1.41124	-1.30504	-0.652478	-0.498768	-0.690723	-0.407094
ENSMUSG00000035722	Abca7	842.904	0.566937	0.210905	-2.68812	0.00718563	0.128908	0.0234075	0.413718	-0.454685	0.528438	0.430298	0.53574
ENSMUSG00000053617	Sh3pxd2a	498.459	0.966466	0.359684	-2.68698	0.00721004	0.129029	-1.61496	-2.76328	-1.91922	-1.26978	-0.673662	-1.56946
ENSMUSG00000032470	Mras	932.591	-0.421364	0.156804	2.6872	0.00720544	0.129029	-0.82177	-0.589341	-1.05144	-1.32038	-1.27964	-1.33143
ENSMUSG00000020173	Cobl	138.806	-1.52974	0.569445	2.68637	0.00722336	0.129109	1.84293	2.09889	0.0593811	-1.34173	0.75985	-0.365859
ENSMUSG00000042682	Selenok	835.261	0.841311	0.313465	-2.6839	0.00727679	0.129272	-0.582816	-1.47925	-0.64107	-0.174553	-0.142268	0.108963
ENSMUSG00000031312	Itgb1bp2	7.85777	4.08794	1.52272	-2.68463	0.00726098	0.129272	#NAME?	#NAME?	#NAME?	-1.03683	-1.06043	0.359687
ENSMUSG00000023052	Npff	16.3044	3.59265	1.33835	-2.68439	0.00726621	0.129272	-1.74267	#NAME?	#NAME?	-0.239147	-1.29324	0.548094
ENSMUSG00000046441	Cmtr2	250.234	-0.791937	0.295044	2.68413	0.00727186	0.129272	-0.300266	-0.509811	-1.14991	-1.28658	-1.80184	-1.52513
ENSMUSG00000047515	BC049715	8.1455	-4.52768	1.68604	2.6854	0.00724432	0.129272	1.19517	#NAME?	#NAME?	#NAME?	#NAME?	#NAME?
ENSMUSG00000026765	Lypd6b	72.5553	-1.9964	0.744057	2.68313	0.00729363	0.129312	2.78196	0.957793	-0.335129	-1.92815	-0.107151	-0.442049
ENSMUSG00000068267	Cenpb	1050.53	0.509867	0.190037	-2.68299	0.00729677	0.129312	-2.28476	-2.57305	-2.33873	-2.16142	-1.72401	-1.98832
ENSMUSG00000049985	Ankrd55	124.764	-1.01618	0.37896	2.68149	0.00732958	0.129678	1.55593	2.37489	1.31326	-0.0237927	1.28089	0.781666
ENSMUSG00000046364	Rpl27a	989.184	-0.504432	0.188135	2.68123	0.00733521	0.129678	-0.60032	-0.181175	-0.914165	-0.860291	-1.2915	-1.2606
ENSMUSG00000031750	Il34	111.084	-1.08207	0.403965	2.67862	0.00739266	0.130535	0.593576	0.607528	-0.177813	-1.75803	-0.773081	-0.409695
ENSMUSG00000037902	Sirpa	5393.37	-0.539262	0.201401	2.67755	0.00741622	0.130793	-0.14856	0.263588	-0.225926	-0.550477	-0.793871	-0.550164
ENSMUSG00000031380	Vegfd	5.76531	4.23378	1.58147	-2.67712	0.00742579	0.130803	#NAME?	#NAME?	#NAME?	0.746132	0.760296	-0.3213
ENSMUSG00000062257	Opcml	1622.54	-0.463359	0.173241	2.67466	0.0074806	0.131293	0.0321117	-0.0744668	-0.319644	-0.807536	-0.376409	-0.762371
ENSMUSG00000028614	Ndc1	407.515	-0.826187	0.308854	2.67501	0.00747272	0.131293	-0.145072	0.974773	0.44652	-0.462999	-0.459126	-0.394413
ENSMUSG00000060601	Nr1h2	448.238	0.526915	0.196945	-2.67545	0.00746299	0.131293	-0.657648	-1.13303	-0.696712	-0.317777	-0.556867	-0.249628
ENSMUSG00000024561	Mbd1	508.858	0.83907	0.313808	-2.67383	0.00749899	0.131458	-1.48115	-2.41994	-2.04918	-1.08413	-0.757386	-1.75699
ENSMUSG00000036990	Otud4	834.944	0.623586	0.233268	-2.67326	0.00751188	0.131526	-1.77778	-2.2965	-2.50947	-1.36118	-1.45998	-2.08538
ENSMUSG00000020639	Pfn4	66.9461	-1.34614	0.503885	2.67153	0.0075506	0.131729	-0.675304	-0.607298	-1.50121	-1.96289	-2.19927	-2.76168
ENSMUSG00000028443	Nudt2	198.848	-0.728396	0.272646	2.67158	0.00754944	0.131729	1.47872	1.74436	1.43212	0.670658	0.415969	1.04776
ENSMUSG00000043441	Gpr149	16.5764	-3.14776	1.17794	2.67225	0.00753438	0.131729	1.99029	3.98049	0.972964	-0.75298	#NAME?	-0.790388
ENSMUSG00000040464	Gtpbp10	134.344	-1.03188	0.3865	2.6698	0.00758974	0.132096	-1.18926	-0.319134	-1.86177	-1.96198	-2.38783	-2.03407
ENSMUSG00000116138	C030006K11Rik	227.768	0.709842	0.265876	-2.66982	0.00758919	0.132096	0.11029	0.571502	0.620659	0.756203	1.10575	1.38585
ENSMUSG00000037326	Capn15	1029.11	0.657405	0.246284	-2.6693	0.00760096	0.132134	-0.741478	-0.707502	-0.654041	-0.164552	0.255531	-0.542165
ENSMUSG00000021478	Drd1	11.7544	-3.48151	1.30513	2.66756	0.00764046	0.132662	1.80792	-0.541313	1.78691	#NAME?	-1.30953	-1.72534
ENSMUSG00000031921	Terf2	470.984	-0.460949	0.172938	2.6654	0.00768977	0.133359	-0.0612527	-0.21201	-0.337585	-0.526883	-0.634281	-1.02775
ENSMUSG00000045410	Akr1e1	502.069	0.499878	0.187681	-2.66345	0.00773441	0.133394	0.151876	-0.275974	0.00520289	0.595062	0.386846	0.229723
ENSMUSG00000046727	Cystm1	1682.08	0.669518	0.251474	-2.66237	0.00775917	0.133394	1.49171	1.25461	1.91806	1.85316	2.1086	2.50767
ENSMUSG00000027668	Mfn1	1633.96	0.408899	0.153573	-2.66258	0.00775453	0.133394	-0.432405	-0.75706	-0.902122	-0.489277	-0.24743	-0.329104
ENSMUSG00000023367	Tmem176a	148.226	-0.820281	0.30813	2.66212	0.00776494	0.133394	2.29981	2.03835	2.2917	1.30944	0.96387	1.4921
ENSMUSG00000026249	Serpine2	2497.16	-0.784358	0.29463	2.66218	0.00776359	0.133394	1.54702	1.99116	1.08363	0.443873	0.680163	0.956164
ENSMUSG00000063234	Gpr84	11.9412	3.4678	1.30206	-2.66333	0.00773721	0.133394	-0.652173	#NAME?	0.121022	3.22139	1.31692	3.41703
ENSMUSG00000024104	Washc2	8018.44	0.980724	0.368237	-2.6633	0.0077379	0.133394	0.248434	-0.962468	0.621318	0.859656	1.04105	1.09647
ENSMUSG00000042097	Zfp239	171.346	-1.44641	0.54302	2.66365	0.00772987	0.133394	-2.85822	-4.36656	-3.17588	-6.79281	-3.21011	-6.2799
ENSMUSG00000035936	Aldh5a1	1338.62	0.527466	0.198187	-2.66145	0.00778053	0.133505	-0.512001	-0.923867	-0.300574	-0.00520267	-0.0597617	-0.255027
ENSMUSG00000074826	Gm10767	29.0739	-3.72785	1.40184	2.65925	0.00783156	0.133547	-2.79867	-1.61917	#NAME?	#NAME?	#NAME?	#NAME?
ENSMUSG00000052407	Ccdc171	28.8967	2.56084	0.962514	-2.66057	0.00780076	0.133547	-2.45031	#NAME?	-3.21828	-1.74737	-0.0956983	-0.837646
ENSMUSG00000062778	Chia1	7.30152	3.93274	1.47905	-2.65897	0.00783791	0.133547	#NAME?	#NAME?	#NAME?	0.019455	0.614983	-0.269856
ENSMUSG00000026260	Ndufa10	2345.36	-0.300203	0.112872	2.65969	0.00782137	0.133547	1.40538	1.45836	1.35669	1.13575	0.994361	0.966925
ENSMUSG00000046862	Pramel12	336.012	-0.728141	0.273745	2.65993	0.00781579	0.133547	0.163437	-0.00908542	0.230782	-0.917794	-0.92366	-0.35217
ENSMUSG00000020937	Plcd3	166.317	1.05603	0.397062	-2.6596	0.00782328	0.133547	-0.228541	-1.52815	-0.317726	0.341082	0.353617	0.642665
ENSMUSG00000004931	Apba3	230.433	0.756096	0.284467	-2.65794	0.00786193	0.133644	-0.92065	-0.229555	-1.17034	0.00306375	0.196321	-0.418191
ENSMUSG00000051747	Ttn	66.1315	-1.29856	0.488513	2.65819	0.00785611	0.133644	1.72496	1.66563	-0.236706	-0.135643	0.201397	-0.570749
ENSMUSG00000050052	Tdrp	208.909	0.918841	0.345917	-2.65625	0.00790151	0.133848	-0.380226	-0.193414	-0.234118	1.17845	0.58442	0.0211725
ENSMUSG00000031766	Slc12a3	13.1197	4.61593	1.73739	-2.65681	0.00788831	0.133848	#NAME?	#NAME?	#NAME?	0.490367	#NAME?	-0.269856
ENSMUSG00000017376	Nlk	493.255	0.609738	0.229542	-2.65632	0.00789984	0.133848	-1.90428	-2.17848	-2.81081	-1.64996	-1.45191	-2.07707
ENSMUSG00000043090	Zfp866	415.622	-0.757531	0.285328	2.65495	0.0079321	0.134211	-1.89756	-2.06448	-2.51448	-3.32256	-3.02545	-2.68205
ENSMUSG00000030854	Ptpn5	383.644	-1.07274	0.40439	2.65274	0.00798424	0.134545	0.644358	0.561043	-0.67944	-1.83287	-0.181777	-1.03765
ENSMUSG00000038872	Zfhx3	177.447	-1.37973	0.520049	2.65308	0.0079761	0.134545	2.74917	2.06985	0.732254	-0.278784	1.43311	-0.216069
ENSMUSG00000043587	Pxylp1	426.932	-1.00676	0.379497	2.65289	0.0079807	0.134545	-0.926766	0.101838	-0.926509	-2.05762	-1.4516	-1.27622
ENSMUSG00000026502	Desi2	482.744	-0.890554	0.335736	2.65254	0.00798875	0.134545	-2.0716	-1.2172	-1.78441	-2.03636	-2.53821	-3.27002
ENSMUSG00000037216	Lipt1	42.512	-1.44145	0.543614	2.65161	0.00801085	0.134761	0.562709	0.98131	1.55337	0.314703	-0.648993	-1.468
ENSMUSG00000046873	Mbtps2	564.132	-0.872568	0.329359	2.64929	0.00806613	0.135535	0.300295	0.93085	-0.344913	-0.642256	-0.636203	-0.435935
ENSMUSG00000032946	Rasgrp2	272.361	-1.2381	0.467589	2.64783	0.00810107	0.135762	1.88659	1.9841	0.777968	-0.863414	0.565958	0.638441
ENSMUSG00000028419	Chmp5	1305.83	0.490579	0.185295	-2.64756	0.00810758	0.135762	0.243376	0.33895	0.419501	1.12122	0.46322	0.657045
ENSMUSG00000047434	Xxylt1	348.091	-0.72874	0.275178	2.64824	0.0080911	0.135762	-0.28696	0.305037	-0.144038	-0.984097	-0.859369	-0.716805
ENSMUSG00000024827	Gldc	479.245	0.929908	0.351309	-2.64698	0.00812143	0.135838	-0.190334	-1.43923	-0.180826	0.586052	-0.0463097	0.445448
ENSMUSG00000051136	Ghsr	5.33946	-5.51831	2.0852	2.64641	0.00813506	0.135911	#NAME?	4.75431	5.61267	#NAME?	0.961876	0.403478
ENSMUSG00000028063	Lmna	624.938	0.618714	0.23387	-2.64555	0.00815586	0.136102	0.286284	0.443013	0.910428	1.23906	0.932019	1.17466
ENSMUSG00000020607	Lratd1	568.853	0.892669	0.337679	-2.64354	0.00820433	0.136598	-0.700703	-1.29672	-0.918969	-0.712575	-0.18345	0.493156
ENSMUSG00000035151	Elmod2	448.59	-0.584034	0.220927	2.64357	0.00820375	0.136598	-0.831322	-0.335442	-0.556976	-1.06313	-1.40951	-1.2588
ENSMUSG00000036452	Arhgap26	3035.67	0.643546	0.243513	-2.64276	0.00822336	0.136657	-0.209942	-0.794322	0.114303	0.333404	0.399368	0.12694
ENSMUSG00000059208	Hnrnpm	1772.45	0.512222	0.193831	-2.64263	0.0082266	0.136657	-0.44574	-0.323086	-1.03073	0.103681	-0.285756	-0.345327
ENSMUSG00000030109	Slc6a12	90.2251	0.919125	0.347914	-2.64182	0.00824619	0.136827	0.754285	0.0667779	0.390826	1.3455	1.48861	1.08856
ENSMUSG00000019362	D8Ertd738e	572.879	0.498377	0.188745	-2.64048	0.00827879	0.137212	1.01923	0.494686	0.638902	1.1784	0.956601	1.30097
ENSMUSG00000036810	Cnep1r1	437.698	-0.685659	0.259776	2.63942	0.00830468	0.137484	-0.782731	-0.285693	-0.774619	-1.79317	-1.43315	-1.03887
ENSMUSG00000016427	Ndufa1	1660.2	0.449714	0.170457	-2.63828	0.00833282	0.137794	3.07036	3.31971	2.88681	3.60059	3.31196	3.49174
ENSMUSG00000075467	Dnlz	283.468	0.719547	0.272902	-2.63665	0.00837284	0.138237	-0.0146899	-0.794421	-0.455689	0.494704	-0.00291536	0.181589
ENSMUSG00000033060	Lmo7	262.168	0.871957	0.330769	-2.63615	0.00838528	0.138237	-0.948059	-0.609564	-0.188222	0.635329	0.27091	-0.185096
ENSMUSG00000074607	Tox2	207.362	-1.69554	0.643216	2.63604	0.00838806	0.138237	3.3787	1.04948	2.00271	-0.44247	1.37137	0.442722
ENSMUSG00000029701	Rbm28	524.586	0.745214	0.282792	-2.6352	0.00840874	0.138421	-1.44041	-1.87486	-2.15263	-0.861168	-1.10989	-1.4337
ENSMUSG00000034135	Sik3	2235.82	-0.37986	0.144188	2.63449	0.0084265	0.138558	0.470197	0.638383	0.404996	-0.13986	0.235571	0.0558298
ENSMUSG00000004610	Etfb	163.301	0.793603	0.301576	-2.63152	0.00850034	0.139144	1.5517	1.92099	1.88128	2.87744	2.54184	2.05076
ENSMUSG00000005237	Dnah2	40.5814	1.88155	0.714799	-2.63228	0.00848146	0.139144	-2.11308	-1.34995	-1.50889	0.629644	0.559512	-1.03714
ENSMUSG00000023044	Csad	619.837	0.736446	0.279832	-2.63174	0.00849486	0.139144	-0.0229626	0.195771	0.756634	0.897102	1.1905	0.979784
ENSMUSG00000040620	Dhx33	553.373	-0.483961	0.183831	2.63264	0.00847235	0.139144	-0.653094	-0.317229	-0.627731	-0.991233	-1.22118	-1.0672
ENSMUSG00000039048	Foxred1	431.35	-0.500498	0.190284	2.63027	0.00853182	0.139355	0.363187	0.202823	-0.229721	-0.55105	-0.33591	-0.492564
ENSMUSG00000045322	Tlr9	24.0876	-3.2466	1.23433	2.63025	0.00853231	0.139355	8.69652	2.55639	6.75032	0.493955	1.15664	1.75004
ENSMUSG00000049036	Tmem121	89.1756	-1.00679	0.383006	2.62866	0.00857226	0.139851	1.33818	1.67168	1.12239	0.0120184	0.502667	0.479131
ENSMUSG00000001127	Araf	2693.09	-0.522029	0.199183	2.62085	0.0087711	0.141514	0.642968	0.459608	0.141016	-0.601054	-0.0569167	0.0626452
ENSMUSG00000090236	Car15	80.2739	2.54598	0.971436	-2.62084	0.0087714	0.141514	-4.45448	-3.74519	-4.49991	-0.855553	-1.1079	#NAME?
ENSMUSG00000021948	Prkcd	1298.55	0.439405	0.167613	-2.62154	0.00875322	0.141514	0.172332	0.0987425	0.271809	0.521366	0.444297	0.714002
ENSMUSG00000078451	Ppil6	46.4811	1.49944	0.572186	-2.62055	0.00877883	0.141514	-0.00149184	-0.205539	-0.711618	0.639742	0.129691	2.15387
ENSMUSG00000024735	Prpf19	3867.25	-0.345813	0.131947	2.62086	0.00877087	0.141514	1.10705	1.17702	0.928757	0.556393	0.594973	0.772118
ENSMUSG00000066191	Anks6	187.844	1.06353	0.405695	-2.6215	0.00875441	0.141514	-0.932896	-1.43147	-1.6901	-0.20614	0.195072	-1.21779
ENSMUSG00000036327	Qsox2	501.288	-0.640749	0.244201	2.62386	0.00869395	0.141514	0.811163	1.12697	0.337144	0.182469	-0.153161	0.174971
ENSMUSG00000018822	Sfrp5	45.1194	-1.66179	0.633753	2.62214	0.0087379	0.141514	3.45679	2.39121	1.89858	-0.200431	1.31089	0.997082
ENSMUSG00000031431	Tsc22d3	2212.96	0.836933	0.319383	-2.62047	0.00878098	0.141514	-0.135657	-0.555202	0.246805	0.194365	0.331367	1.15318
ENSMUSG00000034701	Neurod1	6632.76	-0.696483	0.265775	2.62058	0.00877815	0.141514	0.285224	0.915882	0.492366	-0.0509179	-0.396357	-0.0977668
ENSMUSG00000007891	Ctsd	2898.89	-0.616552	0.234958	2.62409	0.00868796	0.141514	0.144451	0.605222	0.556414	-0.424819	-0.431849	0.0104172
ENSMUSG00000024661	Fth1	6430.54	0.696884	0.266346	-2.61647	0.00888454	0.141935	-0.981641	-1.60215	-0.916949	-0.497353	-0.470319	-0.52233
ENSMUSG00000026100	Mstn	8.04187	3.79631	1.45084	-2.61663	0.0088802	0.141935	#NAME?	#NAME?	-1.02704	1.23237	-0.26303	2.26859
ENSMUSG00000001151	Pcnt	796.822	0.535835	0.20474	-2.61714	0.0088669	0.141935	-0.287106	-0.59968	-0.489311	0.105037	0.0739326	-0.175014
ENSMUSG00000024974	Smc3	1809.48	0.443097	0.169241	-2.61815	0.00884081	0.141935	-0.568188	-0.610694	-0.457943	0.131287	-0.478332	-0.210535
ENSMUSG00000046897	Zfp740	999.663	0.527664	0.201495	-2.61875	0.00882538	0.141935	-2.8392	-3.51899	-3.39298	-2.91832	-2.60629	-2.78202
ENSMUSG00000001052	Sec24b	1204.22	-0.37163	0.141987	2.61735	0.00886155	0.141935	0.689724	0.515945	0.613023	0.181606	0.245929	0.0615511
ENSMUSG00000050796	B3galt6	236.778	-0.770328	0.294417	2.61645	0.00888491	0.141935	0.603521	1.63134	1.28768	0.451512	0.328714	0.284539
ENSMUSG00000043388	Tmem130	2791.08	-0.816391	0.311848	2.61791	0.00884697	0.141935	1.90756	1.69713	1.53783	0.242805	1.39594	0.869928
ENSMUSG00000055923	Aasdh	110.623	1.67611	0.640701	-2.61605	0.00889524	0.141944	-2.38701	#NAME?	-3.68825	-1.50469	-1.22384	-3.24602
ENSMUSG00000051359	Ncald	2072.55	-0.524144	0.20045	2.61484	0.00892697	0.141958	-0.380112	-0.350022	-1.04847	-1.33994	-1.23852	-1.00393
ENSMUSG00000028998	Tomm7	1081.38	0.543065	0.207768	-2.61381	0.00895391	0.141958	2.23596	2.30021	1.60431	2.73232	2.18263	2.62283
ENSMUSG00000048814	Lonrf2	2184.56	-0.409293	0.156657	2.61267	0.0089837	0.141958	-0.590004	-0.289129	-0.502972	-0.963811	-0.873693	-0.976341
ENSMUSG00000024603	Dctn4	1705.01	-0.298843	0.114362	2.61313	0.00897159	0.141958	0.406445	0.306426	0.32619	0.0376099	-0.00440917	-0.120073
ENSMUSG00000037235	Mxd4	1140.02	0.554552	0.212244	-2.61281	0.00898022	0.141958	-1.52044	-2.14083	-1.52971	-1.27058	-1.36118	-1.0918
ENSMUSG00000055850	Rnf181	660.864	0.580282	0.222083	-2.6129	0.00897768	0.141958	-0.558054	-0.443458	-0.128322	0.0962394	0.0336088	0.294405
ENSMUSG00000062040	Zfp27	271.487	-0.634267	0.242581	2.61466	0.00893157	0.141958	-0.156925	-0.24572	-0.407191	-1.0258	-1.01155	-0.890368
ENSMUSG00000026697	Myoc	186.533	-1.46285	0.559785	2.61324	0.00896878	0.141958	1.60493	3.40494	0.565787	-0.359889	1.06768	0.0839197
ENSMUSG00000049709	Nlrp10	84.5805	1.21414	0.464291	-2.61504	0.00892169	0.141958	0.410331	0.0451943	1.76549	1.75072	2.08959	1.63958
ENSMUSG00000045441	Gprin3	301.207	-0.556343	0.213057	2.61124	0.00902156	0.142402	-0.711331	-0.632158	-0.575008	-1.04305	-1.3428	-1.4183
ENSMUSG00000024270	Slc39a6	895.144	-0.388387	0.148863	2.60902	0.00908009	0.142995	0.71329	0.617047	0.606743	0.320853	0.0754161	0.143096
ENSMUSG00000048920	Fkrp	396.152	0.579314	0.222127	-2.60803	0.00910645	0.142995	-0.579292	-0.542791	-0.250666	-0.246689	0.157418	0.285987
ENSMUSG00000001435	Col18a1	3171.71	0.807893	0.309734	-2.60834	0.00909824	0.142995	0.834039	0.677497	1.72147	1.66637	1.90018	1.95417
ENSMUSG00000029186	Pi4k2b	33.6172	2.29767	0.880979	-2.60809	0.00910485	0.142995	-3.07215	#NAME?	-3.32843	-1.1878	-1.17116	-1.82242
ENSMUSG00000026836	Acvr1	566.479	-0.507437	0.194572	2.60797	0.00910816	0.142995	0.609384	0.731097	0.249935	-0.0182635	0.0731838	-0.212991
ENSMUSG00000022604	Cep97	404.217	-0.548865	0.210531	2.60705	0.00913256	0.143042	-0.373198	-0.281089	-0.453674	-1.0375	-0.704708	-1.21628
ENSMUSG00000062580	Timm17a	970.811	-0.460358	0.176599	2.6068	0.00913929	0.143042	-0.10057	-0.174483	-0.711505	-0.781709	-0.759615	-1.0066
[truncated: 13,633 more rows]
